# Supplementary material for: Integrative analysis of 3604 GWAS reveals multiple novel cell type-specific regulatory associations
Source: Genome Biol. 2022 Jan 7;23:13. doi: 10.1186/s13059-021-02560-3 (PMC8742386; doi:10.1186/s13059-021-02560-3)
Supplement: Supplementary file 3 — Additional file 3: Table S2. Unconsolidated (2012) Epigenomics Roadmap DNase I hotspot FORGE2 GWAS catalogue analysis results (q-values). [file 13059_2021_2560_MOESM3_ESM.xlsx]

## Sheet: sig.sites.erc.qvals
Table S2: Unconsolidated (2012) Epigenomics Roadmap DNase I hotspot FORGE2 GWAS catalog analysis results (q-values):
Cell_Tissue_File	Waist_circumference_adjusted_for_BMI_in_non-smokers	White_blood_cell_count	Sulfasalazine-induced_agranulocytosis	Sum_basophil_neutrophil_counts	Asthma_childhood_onset	Albumin-globulin_ratio	Cardiovascular_disease	Platelet_distribution_width	Eosinophil_percentage_of_granulocytes	Non-glioblastoma_glioma	Chronic_kidney_disease	Sum_eosinophil_basophil_counts	Non-melanoma_skin_cancer	Primary_sclerosing_cholangitis	Medication_use_agents_acting_on_the_renin-angiotensin_system	Coronary_artery_disease	Eosinophil_percentage_of_white_cells	Sum_neutrophil_eosinophil_counts	Chronic_lymphocytic_leukemia	Waist_circumference_adjusted_for_BMI_joint_analysis_main_effects_and_smoking_interaction	Granulocyte_count	Triglyceride_change_in_response_to_fenofibrate_in_statin-treated_type_2_diabetes	Lymphocyte_counts	PR_interval	Triglyceride_levels	Hypothyroidism	Heart_rate_in_heart_failure_with_reduced_ejection_fraction	Waist_circumference_adjusted_for_body_mass_index	Acute_lymphoblastic_leukemia_B-cell_precursor	Lymphocyte_percentage_of_white_cells	PR_interval_in_Tripanosoma_cruzi_seropositivity	Granulocyte_percentage_of_myeloid_white_cells	Atrial_fibrillation	Diastolic_blood_pressure	FEV1	Mosquito_bite_size	Acute_lymphoblastic_leukemia_in_childhood_B_cell_precursor	Cognitive_performance_MTAG	Macrophage_inflammatory_protein_1b_levels	Peripheral_arterial_disease_traffic-related_air_pollution_interaction	Height	Systemic_lupus_erythematosus	Mouth_ulcers	Medication_use_drugs_used_in_diabetes	Body_mass_index	Idiopathic_pulmonary_fibrosis	Waist-hip_ratio	Macular_thickness	Educational_attainment_years_of_education
CD3_Blood_UW.CD3_Primary_Cells.ChromatinAccessibility.CB1_1-3-2011.DS17702.twopass.merge150.wgt10.zgt2.wig.gz	0.186	2.16e-13	0.0546	0.0208	2.19e-06	0.0862	0.112	8.76e-05	2.18e-07	0.00647	0.361	1.72e-09	0.00956	0.207	0.00434	0.608	1.16e-07	0.0178	0.00179	0.272	0.0347	0.295	4.09e-12	0.286	0.487	1.43e-07	1	0.146	0.539	3.37e-06	0.0851	7.2e-08	0.394	0.02	0.942	0.00795	0.476	0.863	0.0935	0.0429	4.42e-11	6.79e-07	0.0076	0.159	0.603	1	0.567	0.641	0.108
CD3_Blood_UW.CD3_Primary_Cells.ChromatinAccessibility.CB6_1-4-2011.DS17706.twopass.merge150.wgt10.zgt2.wig.gz	0.0999	2.85e-10	0.0258	0.00308	0.000178	0.00308	0.00403	0.000118	2.85e-07	0.0757	0.156	2.98e-05	0.0543	0.209	0.00284	0.00198	5.16e-06	0.0147	1.31e-05	0.0899	0.0259	1	7.53e-06	0.396	0.138	0.000107	0.76	0.018	1	1.9e-06	0.0105	1.03e-13	0.201	0.000239	0.807	0.00693	0.693	0.497	0.0441	0.0222	2.22e-15	3.63e-10	0.104	0.056	0.112	1	0.0613	0.133	0.0114
CD3_Blood_UW.CD3_Primary_Cells.ChromatinAccessibility.RO_01679.DS17198.twopass.merge150.wgt10.zgt2.wig.gz	0.0982	8.75e-15	0.316	0.0428	7.36e-09	0.201	0.00573	0.000416	6.59e-07	0.0102	0.164	3.69e-08	0.00398	0.0666	0.00154	0.0802	1.21e-07	0.0762	6.26e-06	0.168	0.127	1	4.37e-17	0.296	0.16	2.23e-07	0.835	0.454	0.102	7.18e-07	0.202	8.45e-11	0.118	0.0106	0.463	0.00557	0.222	0.834	0.0204	0.00695	3.54e-17	3.24e-08	0.0112	0.0323	0.193	0.757	0.0968	0.675	0.0609
CD3_Blood_UW.CD3_Primary_Cells.ChromatinAccessibility.RO_01701.DS17534.twopass.merge150.wgt10.zgt2.wig.gz	0.00282	1.5e-12	0.122	0.0912	7.48e-06	0.428	0.0287	0.0444	7.45e-07	0.0275	0.322	4.62e-11	0.00449	0.00766	0.000847	0.205	7.29e-06	0.2	3.18e-05	0.00366	0.134	1	4.13e-11	0.378	0.00743	1.26e-06	0.265	0.00165	0.225	2.89e-06	0.248	8.45e-11	0.0866	0.000941	0.71	0.00115	0.151	0.809	0.0183	0.0442	2.49e-11	7.04e-10	0.0764	0.0284	0.112	1	0.0688	0.244	0.0227
CD4_Mobilised;_Blood_UW.Mobilized_CD4_Primary_Cells.ChromatinAccessibility.RO_01679.DS16955.twopass.merge150.wgt10.zgt2.wig.gz	0.00334	4.58e-18	0.0241	0.0113	1.75e-08	0.0805	0.0076	0.00755	1.72e-09	0.0275	0.457	3.12e-11	0.0238	0.222	0.00577	0.032	1.01e-08	0.0343	0.00163	0.00076	0.0846	1	3.19e-12	0.451	0.0759	2.23e-07	0.777	4.17e-05	0.0315	6.85e-07	0.383	1.24e-14	0.0787	0.00183	0.414	0.00739	0.148	0.72	0.0024	0.0211	3.65e-14	1.33e-10	0.0157	0.0256	0.0652	1	0.237	0.738	0.396
CD4_Mobilised;_Blood_UW.Mobilized_CD4_Primary_Cells.ChromatinAccessibility.RO_01701.DS17175.twopass.merge150.wgt10.zgt2.wig.gz	0.361	6.48e-15	0.0148	0.00435	7e-06	0.107	0.00979	0.000416	8.18e-09	0.0173	0.448	2.79e-08	0.00398	0.0863	0.0021	0.159	2.21e-06	0.00678	0.00163	0.315	0.0129	1	4.85e-11	0.509	0.0368	3.3e-08	0.491	0.114	0.619	7.18e-07	0.262	6.9e-19	0.0322	0.0482	0.493	0.0113	0.542	0.634	0.0404	0.00859	2.12e-11	5.29e-09	0.00836	0.0301	0.409	0.357	0.325	0.57	0.396
CD4_Blood_UW.CD4_Primary_Cells.ChromatinAccessibility.RO_01549.DS15947.twopass.merge150.wgt10.zgt2.wig.gz	0.0951	1.46e-12	0.452	0.00402	1.01e-05	0.184	0.0573	0.00187	3.02e-08	0.044	0.593	4.13e-11	0.0117	0.314	0.0135	0.0647	3.31e-08	0.0101	0.000455	0.0477	0.0167	1	1.54e-12	0.315	0.219	3.65e-06	1	0.0261	0.0202	7.18e-07	0.418	2.3e-14	0.206	0.0167	0.698	0.00481	0.0982	0.651	0.0835	0.00635	1.48e-10	7.96e-07	0.0428	0.0763	0.194	1	0.0316	0.429	0.153
CD4_Blood_UW.CD4_Primary_Cells.ChromatinAccessibility.RO_01679.DS17212.twopass.merge150.wgt10.zgt2.wig.gz	0.0765	2.34e-18	0.306	0.00191	2.51e-10	0.148	0.00375	0.0013	2.97e-09	0.0354	0.694	3.12e-11	0.00858	0.251	0.00249	0.282	3.52e-08	0.000784	0.000501	0.129	0.00837	1	1.44e-12	0.431	0.563	2.23e-07	0.857	0.0262	0.539	1.3e-06	0.068	3.21e-18	0.0258	0.00428	0.474	0.00481	0.23	0.751	0.00356	0.00931	3.94e-14	2.49e-10	0.00157	0.017	0.353	0.771	0.0124	0.451	0.182
CD4_Blood_UW.CD4_Primary_Cells.ChromatinAccessibility.RO_01689.DS17329.twopass.merge150.wgt10.zgt2.wig.gz	0.0299	8.49e-11	0.0618	0.116	3.23e-06	0.126	0.0177	0.0313	2.07e-05	0.00389	0.283	4.73e-07	0.00503	0.103	0.0047	0.0802	8.18e-07	0.18	0.00596	0.0177	0.243	1	4.22e-14	0.434	0.0162	1e-05	0.876	0.000536	0.0288	5.28e-05	0.0428	5.58e-09	0.0888	0.000705	0.216	0.00481	0.0476	0.951	0.000464	0.00185	5.63e-14	8e-07	0.00106	0.103	0.0112	1	0.0344	0.316	0.465
CD4_Blood_UW.CD4_Primary_Cells.ChromatinAccessibility.RO_01701.DS17881.twopass.merge150.wgt10.zgt2.wig.gz	0.0606	1.46e-17	1	0.000916	1.77e-08	0.144	0.000773	0.00198	3.56e-10	0.00284	0.0935	5.84e-11	0.00398	0.215	5.44e-05	0.0976	3.57e-08	0.000784	5.55e-05	0.0571	0.0038	0.2	4.53e-13	0.537	0.0414	9.57e-05	1	0.0825	0.518	6.19e-08	0.0385	2.29e-18	0.0191	6.48e-05	0.164	0.000145	0.222	0.335	0.00678	0.00407	4.61e-21	1.14e-07	0.0451	0.00189	0.0126	0.78	1.48e-05	0.139	0.00716
CD8_Mobilised;_Blood_UW.Mobilized_CD8_Primary_Cells.ChromatinAccessibility.RO_01679.DS16962.twopass.merge150.wgt10.zgt2.wig.gz	0.00908	1.22e-13	0.00302	0.0267	3.23e-06	0.0396	0.01	0.0125	1.1e-06	0.00647	0.327	7.4e-08	0.00398	0.185	0.0424	0.151	6.95e-08	0.109	0.00022	0.00942	0.231	1	3.37e-09	0.723	0.052	0.00069	0.059	0.0146	0.153	1.14e-05	0.131	3.71e-16	0.145	0.00306	0.406	0.0587	0.123	0.798	0.0273	0.0075	5.54e-13	3.24e-08	0.0239	0.0359	0.0381	0.8	0.00491	0.506	0.0689
CD8_Blood_UW.CD8_Primary_Cells.ChromatinAccessibility.RO_01549.DS16012.twopass.merge150.wgt10.zgt2.wig.gz	0.0688	5.01e-12	0.0346	0.0702	0.000233	0.0093	0.0894	0.00771	3.4e-07	0.0757	0.275	3.85e-08	0.00422	0.142	0.00673	0.00502	1.27e-07	0.118	0.00273	0.0412	0.228	1	3.53e-11	0.537	0.0695	8.1e-05	0.296	0.0057	0.0427	2.49e-06	0.0849	1.03e-11	0.238	0.0219	0.868	0.00481	0.059	0.918	0.117	0.0138	9.46e-07	3.81e-07	0.0208	0.176	0.0311	1	0.0506	0.79	0.437
CD8_Blood_UW.CD8_Primary_Cells.ChromatinAccessibility.RO_01679.DS17203.twopass.merge150.wgt10.zgt2.wig.gz	0.155	2.26e-18	0.00389	0.013	3.71e-07	0.148	0.00698	0.0013	4.06e-09	0.00647	0.31	2.55e-11	0.00485	0.0859	0.000135	0.00791	5.64e-08	0.0262	5.53e-05	0.119	0.0259	1	7.43e-14	0.353	0.13	1.43e-07	0.76	0.0571	0.00744	9.63e-08	0.111	1.79e-14	0.525	0.00211	0.572	0.000448	0.0476	0.746	0.0152	0.00724	4.71e-18	9.56e-12	0.00618	0.0387	0.235	1	0.0583	0.244	0.0234
CD8_Blood_UW.CD8_Primary_Cells.ChromatinAccessibility.RO_01689.DS17332.twopass.merge150.wgt10.zgt2.wig.gz	0.218	1.88e-11	0.356	0.0548	0.000134	0.0147	0.0524	0.00567	7.6e-07	0.00284	0.645	7.43e-08	0.0543	0.317	0.0197	0.0366	9.7e-05	0.0897	0.0019	0.204	0.139	1	2.3e-11	0.321	0.0755	3.65e-06	0.508	0.0101	0.181	7.31e-07	0.337	1.2e-10	0.655	0.0112	0.663	0.0152	0.322	0.791	0.107	0.0477	2.05e-06	4.36e-08	0.0112	0.57	0.0967	1	0.674	0.623	0.0888
CD8_Blood_UW.CD8_Primary_Cells.ChromatinAccessibility.RO_01701.DS17885.twopass.merge150.wgt10.zgt2.wig.gz	0.135	9.64e-15	0.132	0.0403	5.42e-06	0.148	0.0036	0.000709	2.29e-10	0.0028	0.102	9.81e-09	0.00402	0.143	0.00293	0.0357	1.88e-08	0.295	9.66e-05	0.23	0.271	0.171	1.44e-12	0.327	0.0837	1.06e-05	0.678	0.233	0.0414	6.19e-08	0.0619	4.31e-14	0.0331	3.57e-06	0.393	0.0096	0.148	0.62	0.000154	0.00235	5.06e-21	4.39e-09	0.121	0.00831	0.0381	0.756	0.00055	0.122	0.0615
CD14_Blood_UW.CD14_Primary_Cells.ChromatinAccessibility.RO_01689.DS17391.twopass.merge150.wgt10.zgt2.wig.gz	0.0648	6.48e-15	0.169	2.7e-07	7.86e-05	0.00308	0.000405	6.31e-07	5.61e-07	0.0762	0.143	3.69e-08	0.12	0.215	0.00489	0.0203	6.29e-06	5.34e-06	0.108	0.0257	4.67e-05	1	0.0124	0.41	0.0638	0.098	0.76	0.0497	1	0.000268	0.344	8.16e-24	0.267	0.0187	0.197	0.0759	0.694	0.88	0.0024	0.0057	3.12e-10	2.52e-07	0.0217	0.0625	0.602	0.286	0.000584	0.101	0.492
CD14_Blood_UW.CD14_Primary_Cells.ChromatinAccessibility.RO_01701.DS17889.twopass.merge150.wgt10.zgt2.wig.gz	0.613	8.84e-18	1	1.12e-08	0.0229	0.0278	0.0224	3.34e-10	5.49e-09	0.0727	0.137	6.59e-09	0.113	0.0981	0.0301	0.338	3.37e-06	7.43e-09	0.0171	0.491	1.39e-07	1	0.00366	0.321	0.921	0.0704	0.491	0.174	1	8.63e-05	0.216	6.54e-26	0.143	0.00236	0.57	0.302	0.668	0.864	0.047	0.481	1.3e-07	2.98e-07	0.0177	0.0212	0.939	0.0759	0.0128	0.21	0.795
CD19_Blood_UW.CD19_Primary_Cells.ChromatinAccessibility.RO_01679.DS17186.twopass.merge150.wgt10.zgt2.wig.gz	0.12	4.55e-12	0.0618	0.00165	0.00909	0.00134	0.000483	0.000137	1.23e-08	0.00647	0.0573	3.18e-08	0.00285	0.526	0.000385	0.0652	2.31e-07	0.0237	6.26e-06	0.12	0.00707	1	1.3e-06	0.386	0.125	0.00222	0.68	0.0463	0.581	6.55e-06	0.438	1.24e-15	0.109	0.000152	0.197	0.0893	0.0931	0.571	0.0682	0.0576	5.47e-11	6.67e-17	0.219	0.0609	0.0124	1	0.0016	0.306	0.0431
CD19_Blood_UW.CD19_Primary_Cells.ChromatinAccessibility.RO_01689.DS17281.twopass.merge150.wgt10.zgt2.wig.gz	0.0436	6.2e-13	1	0.0013	3.85e-06	0.00368	0.00328	0.000182	1.07e-08	0.0354	0.156	1.32e-08	5.25e-05	0.753	2.68e-05	0.3	1.35e-07	0.0134	0.000327	0.0456	0.0219	1	9.42e-10	0.28	0.143	0.0032	0.825	0.00015	0.581	1.9e-06	0.175	4.08e-14	0.0153	0.00278	0.493	0.149	0.23	0.644	0.00411	0.0576	2.02e-12	2.78e-12	0.0489	0.0174	0.0798	0.777	0.00055	0.328	0.0178
CD19_Blood_UW.CD19_Primary_Cells.ChromatinAccessibility.RO_01701.DS17440.twopass.merge150.wgt10.zgt2.wig.gz	0.0177	8e-10	1	0.00332	0.000257	0.0154	0.0034	0.000859	2.17e-05	0.0173	0.0882	2.41e-07	0.0199	0.207	6.21e-05	0.36	3.93e-06	0.0375	0.000137	0.00783	0.0246	1	8.06e-06	0.498	0.0685	0.00155	0.876	0.000581	1	2.89e-06	0.451	6.39e-14	0.251	0.00228	0.222	0.149	0.728	0.959	0.0306	0.0654	8.62e-09	3.33e-13	0.072	0.0286	0.0381	0.8	0.0296	0.317	0.0947
CD20_Blood_UW.CD20_Primary_Cells.ChromatinAccessibility.RO_01778.DS17371.twopass.merge150.wgt10.zgt2.wig.gz	0.251	3.09e-07	0.0254	0.0462	0.0476	0.691	0.00228	0.0236	0.0686	0.0282	0.0772	0.00652	0.29	0.872	0.0021	0.00197	0.111	0.0752	0.495	0.376	0.124	0.181	0.061	0.365	0.265	0.574	0.647	0.0149	1	0.432	0.181	8.69e-06	0.0197	1.12e-06	0.0105	0.266	0.728	0.463	0.0307	0.0732	2.51e-09	0.00757	0.16	0.00649	0.29	0.0359	2.23e-05	0.162	0.95
CD34_Mobilised;_Blood_UW.Mobilized_CD34_Primary_Cells.ChromatinAccessibility.RO_00738.DS13199.twopass.merge150.wgt10.zgt2.wig.gz	0.0283	3.17e-13	1	3.85e-05	0.00102	0.0943	0.0433	2.28e-11	1.33e-08	0.011	0.42	2.43e-11	0.00398	0.221	0.000259	0.661	9.14e-07	7.57e-05	0.011	0.029	0.000549	0.291	0.000746	0.628	0.0539	0.325	0.76	0.0601	1	0.00123	0.0619	5.97e-12	0.0981	0.0968	0.679	0.241	0.713	0.851	0.00394	0.0132	1.53e-15	0.00021	0.0531	0.00931	0.563	0.295	0.00324	0.191	0.342
CD34_Mobilised;_Blood_UW.Mobilized_CD34_Primary_Cells.ChromatinAccessibility.RO_01480.DS12771.twopass.merge150.wgt10.zgt2.wig.gz	0.069	2.87e-18	0.239	4.28e-07	7.49e-05	0.0093	0.000909	1.14e-13	2.11e-13	0.0107	0.11	5.59e-12	0.00449	0.222	0.000579	0.0703	1.19e-09	1.67e-06	0.000774	0.0666	3.55e-06	0.335	2.35e-06	0.431	0.27	0.0672	0.525	0.0405	1	7.18e-07	0.0723	5.4e-21	0.027	5.93e-05	0.664	0.0759	0.222	0.538	0.000448	0.0777	5.08e-21	1.73e-05	0.127	0.0014	0.0121	0.32	9.36e-06	0.393	0.0615
CD34_Mobilised;_Blood_UW.Mobilized_CD34_Primary_Cells.ChromatinAccessibility.RO_01492.DS12774.twopass.merge150.wgt10.zgt2.wig.gz	0.0455	1.13e-18	0.204	1.25e-06	0.000484	0.0154	0.00427	2.01e-12	1.59e-09	0.00647	0.0567	2.43e-11	0.00754	0.401	0.000454	0.122	3.67e-07	8.77e-06	0.0193	0.0454	9.87e-06	0.291	4.32e-05	0.408	0.0931	0.0302	0.466	0.0388	0.518	1.9e-06	0.115	1.7e-15	0.00477	0.000614	0.317	0.0875	0.694	0.233	0.0144	0.0465	1.08e-23	1.31e-05	0.16	0.0174	0.0381	0.303	0.00134	0.314	0.00901
CD34_Mobilised;_Blood_UW.Mobilized_CD34_Primary_Cells.ChromatinAccessibility.RO_01492.DS14206.twopass.merge150.wgt10.zgt2.wig.gz	0.0335	1.55e-15	0.355	1.9e-06	0.0122	0.0245	0.0345	4.45e-12	7.76e-09	0.0374	0.32	9.95e-12	0.0543	0.468	0.00489	0.0385	5.07e-07	5.34e-06	0.0417	0.0635	1.6e-05	0.418	5.66e-07	0.474	0.355	0.00034	0.876	0.0571	1	5.09e-07	0.248	6.39e-14	0.101	0.000124	0.477	0.484	1	0.848	0.00388	0.0233	1.42e-15	3.33e-05	0.072	0.00589	0.173	0.334	0.000639	0.314	0.131
CD34_Mobilised;_Blood_UW.Mobilized_CD34_Primary_Cells.ChromatinAccessibility.RO_01508.DS11202.twopass.merge150.wgt10.zgt2.wig.gz	0.261	5.9e-15	1	4.28e-07	0.015	0.194	0.00543	8.21e-14	9.6e-10	0.0326	0.0427	2.31e-10	0.00503	0.465	0.0189	0.233	1.65e-06	3.35e-07	0.0371	0.241	1.46e-06	0.349	7.37e-05	0.641	0.22	0.0856	0.829	0.0472	1	1.3e-06	0.161	5.65e-16	0.132	0.000516	0.382	0.142	0.708	0.719	0.00264	0.0512	1.49e-10	6.69e-06	0.213	0.67	0.193	0.303	0.00131	0.744	0.112
CD34_Mobilised;_Blood_UW.Mobilized_CD34_Primary_Cells.ChromatinAccessibility.RO_01517.DS14129.twopass.merge150.wgt10.zgt2.wig.gz	0.598	2.34e-17	0.355	6.12e-07	0.00818	0.505	0.162	5.81e-13	1.59e-09	0.0315	0.103	4.62e-11	0.00754	0.222	0.0117	0.482	1.16e-07	5.34e-06	0.0578	0.331	1.06e-05	0.161	0.000231	0.619	0.0638	0.0255	0.876	0.063	0.539	8.68e-05	0.0892	5.65e-16	0.0673	0.00537	0.646	0.239	0.0662	0.571	0.069	0.0951	3.38e-09	1.94e-05	0.0329	0.0119	0.0971	0.736	0.00424	0.279	0.376
CD34_Mobilised;_Blood_UW.Mobilized_CD34_Primary_Cells.ChromatinAccessibility.RO_01520.DS12785.twopass.merge150.wgt10.zgt2.wig.gz	0.279	6.15e-15	0.239	0.000211	0.00888	0.136	0.00105	2.04e-13	3.42e-10	0.0835	0.0265	5.12e-12	0.0116	0.245	0.00197	0.104	1.05e-07	0.00154	0.0371	0.26	0.00107	0.329	1.25e-05	0.457	0.0539	0.0468	0.825	0.342	1	8.68e-05	0.147	1.13e-15	0.00353	0.000783	0.25	0.14	1	0.329	0.00266	0.19	7.98e-22	0.000185	0.091	0.193	0.0537	0.334	0.000397	0.196	0.0651
CD34_Mobilised;_Blood_UW.Mobilized_CD34_Primary_Cells.ChromatinAccessibility.RO_01527.DS11666.twopass.merge150.wgt10.zgt2.wig.gz	0.174	1.3e-15	0.00623	1.7e-06	0.00262	0.237	0.191	1.51e-08	3.54e-12	0.0113	0.208	1.62e-12	0.0124	0.127	0.000613	0.0373	1.21e-07	5.34e-06	0.0845	0.0849	3.27e-05	0.353	0.000111	0.293	0.0414	0.0156	0.559	0.00981	0.539	7.18e-07	0.165	5.11e-21	0.0308	0.0553	0.525	0.142	0.493	0.411	0.00356	0.00724	9.18e-11	0.000143	0.0162	0.202	0.518	0.303	0.0116	0.461	0.279
CD34_Mobilised;_Blood_UW.Mobilized_CD34_Primary_Cells.ChromatinAccessibility.RO_01535.DS12274.twopass.merge150.wgt10.zgt2.wig.gz	0.00132	6.48e-15	0.0293	3.68e-06	0.00156	0.0862	0.00274	5.84e-13	4.1e-11	0.0242	0.0293	1.56e-12	0.021	0.407	0.00355	0.0739	1.82e-08	1.11e-05	0.00712	0.00173	3.27e-05	0.291	0.000357	0.588	0.308	0.0809	0.261	0.0233	0.518	1.72e-05	0.121	5.34e-19	0.0449	8.35e-05	0.715	0.103	0.437	0.472	0.0144	0.0582	2.01e-22	1.45e-05	0.072	0.315	0.0117	0.756	4.71e-05	0.139	0.123
CD34_Mobilised;_Blood_UW.Mobilized_CD34_Primary_Cells.ChromatinAccessibility.RO_01535.DS14197.twopass.merge150.wgt10.zgt2.wig.gz	0.0294	8.56e-14	0.415	0.000163	0.000524	0.0093	0.0818	1.36e-11	2.06e-11	0.0914	0.666	1.07e-10	0.0238	0.142	0.00472	0.126	6.55e-08	0.000132	0.00459	0.057	0.00073	0.471	5.88e-06	0.382	0.197	0.0881	1	0.0366	0.539	0.000857	0.181	3.68e-15	0.101	0.0129	0.588	0.538	0.713	0.571	0.106	0.0206	1.06e-11	8.14e-05	0.16	0.113	0.431	0.771	0.0165	0.481	0.465
CD34_Mobilised;_Blood_UW.Mobilized_CD34_Primary_Cells.ChromatinAccessibility.RO_01536.DS12339.twopass.merge150.wgt10.zgt2.wig.gz	0.429	1.48e-14	0.178	0.000107	0.0306	0.0583	0.000787	1.93e-12	1.59e-09	0.0275	0.0694	2.09e-09	0.00754	0.445	0.000568	0.0332	1.16e-07	0.000784	0.00443	0.381	0.00519	0.259	0.000108	0.608	0.0837	0.383	0.466	0.251	1	3.78e-05	0.111	1.33e-15	0.206	0.00594	0.128	0.0187	0.222	0.538	0.000154	0.0248	1.35e-18	2.39e-05	0.181	0.0243	0.0798	0.106	4.87e-05	0.172	0.187
CD34_Mobilised;_Blood_UW.Mobilized_CD34_Primary_Cells.ChromatinAccessibility.RO_01549.DS12734.twopass.merge150.wgt10.zgt2.wig.gz	0.0109	4.05e-19	0.0687	1.05e-06	0.000276	0.0862	0.00909	6.48e-11	3.32e-10	0.0159	0.103	5.12e-12	0.0116	0.273	0.0134	0.305	6.95e-08	8.77e-06	0.0357	0.00268	4.93e-05	0.418	3.37e-06	0.409	0.583	0.000656	0.458	0.00252	0.539	2.71e-06	0.251	8.41e-19	0.0915	0.000157	0.203	0.1	0.52	0.565	0.00877	0.027	1.17e-17	3.17e-05	0.088	0.0573	0.0703	0.357	0.00395	0.29	0.0472
CD34_Mobilised;_Blood_UW.Mobilized_CD34_Primary_Cells.ChromatinAccessibility.RO_01562.DS13196.twopass.merge150.wgt10.zgt2.wig.gz	0.0685	4.92e-16	0.028	3.98e-05	0.00128	0.237	0.00617	7.77e-09	2.36e-09	0.0277	0.105	2.43e-11	0.00449	0.103	0.00134	0.238	1.65e-06	0.000353	0.00426	0.0289	0.000201	0.0846	2.38e-05	0.357	0.0414	0.0302	0.491	0.0383	0.539	1.7e-05	0.131	5.32e-17	0.073	0.000991	0.679	0.00481	0.0784	0.335	0.00592	0.00323	3.21e-18	0.000159	0.299	0.176	0.0217	0.325	3.08e-05	0.397	0.0178
CD34_Mobilised;_Blood_UW.Mobilized_CD34_Primary_Cells.ChromatinAccessibility.RO_01701.DS17112.twopass.merge150.wgt10.zgt2.wig.gz	0.0391	1.13e-18	0.056	8.52e-06	2.58e-05	0.0789	0.00204	7.71e-12	5.46e-09	0.00284	0.131	6.85e-10	0.00398	0.0839	0.00149	0.000547	1.05e-07	8.42e-05	0.00176	0.0212	6.07e-05	0.364	1.49e-05	0.422	0.0338	0.0998	0.668	0.00235	1	2.4e-05	0.0686	2.23e-14	0.0132	3.72e-06	0.374	0.0242	0.542	0.165	0.0518	0.0856	1.35e-18	0.00024	0.072	0.00148	0.0381	0.434	1.23e-05	0.0628	0.0103
CD56_Mobilised;_Blood_UW.Mobilized_CD56_Primary_Cells.ChromatinAccessibility.RO_01689.DS16376.twopass.merge150.wgt10.zgt2.wig.gz	0.162	7.34e-08	0.164	0.157	3.85e-06	0.0862	0.0232	0.00264	1.05e-09	0.0275	0.596	1.18e-11	0.0117	0.142	0.00482	0.185	6.1e-09	0.288	5.53e-05	0.266	0.5	0.542	1.02e-13	0.273	0.11	3.78e-06	0.713	0.194	0.00591	2.99e-05	0.381	1.59e-07	0.142	0.119	0.463	0.00693	0.0476	0.805	0.0307	0.053	8.68e-06	9.73e-07	0.0112	0.0595	0.399	1	0.212	0.446	0.469
CD56_Blood_UW.CD56_Primary_Cells.ChromatinAccessibility.RO_01679.DS17189.twopass.merge150.wgt10.zgt2.wig.gz	0.457	3.8e-20	0.177	6.75e-05	3.71e-07	0.0583	0.0131	9.16e-05	2.74e-10	0.0483	0.464	2.43e-11	0.0767	0.0839	0.0012	0.129	1.82e-08	0.000148	0.0018	0.569	0.000324	1	2.39e-12	0.273	0.324	8.64e-07	0.76	0.514	0.0414	7.31e-07	0.0892	6.54e-26	0.207	5.39e-05	0.515	0.149	0.148	0.655	0.279	0.0771	9.45e-13	1.33e-10	0.00106	0.252	0.166	0.707	0.0145	0.21	0.349
CD56_Blood_UW.CD56_Primary_Cells.ChromatinAccessibility.RO_01701.DS17443.twopass.merge150.wgt10.zgt2.wig.gz	0.106	2.48e-09	0.315	0.0369	1.75e-08	0.0212	0.0795	0.000709	1.84e-08	0.0159	0.889	3.69e-08	0.0767	0.0839	0.0448	0.213	2.95e-06	0.0378	0.000455	0.177	0.1	1	9.61e-08	0.403	0.138	0.00162	0.876	0.0108	0.0202	2.15e-06	0.259	6.65e-10	0.266	0.0809	0.71	0.403	0.0908	0.952	0.0783	0.0359	4.7e-07	5.39e-09	0.00656	0.0101	0.587	0.783	0.365	0.694	0.648
Breast_vHMEC_Breast_UW.Breast_vHMEC.ChromatinAccessibility.RM035.DS18406.twopass.merge150.wgt10.zgt2.wig.gz	0.0615	5.45e-09	1	0.165	0.00488	0.77	0.094	0.00384	0.0122	0.276	0.11	0.000903	0.0238	0.767	0.0183	0.0161	0.00625	0.216	0.0798	0.115	0.317	0.425	0.0487	0.36	0.355	0.0216	0.119	0.00256	1	0.0282	0.0723	0.000201	0.0529	0.00564	0.457	0.294	0.721	0.72	0.113	0.124	2.82e-13	0.000159	0.177	0.0111	0.919	0.756	0.0179	0.161	0.957
Breast_vHMEC_Breast_UW.Breast_vHMEC.ChromatinAccessibility.RM035.DS18438.twopass.merge150.wgt10.zgt2.wig.gz	0.218	3.97e-07	0.0635	0.102	0.0145	0.887	0.097	0.015	0.00146	0.0395	0.181	0.000206	0.134	1	0.0654	0.0131	0.0192	0.216	0.142	0.324	0.317	0.443	0.0719	0.757	0.483	0.205	0.479	0.0145	1	0.22	0.152	0.000389	0.02	0.000204	0.567	0.149	0.52	0.62	0.0628	0.161	5.56e-10	0.000185	0.121	0.0119	0.851	0.759	0.0124	0.156	0.919
H1_ES_Cell_UW.H1.ChromatinAccessibility.DS18873.twopass.merge150.wgt10.zgt2.wig.gz	0.0153	8.05e-05	0.0332	0.136	0.0599	0.656	0.0207	0.00245	0.15	0.0871	0.281	0.0775	0.349	0.984	0.0063	0.0299	0.381	0.2	0.56	0.00507	0.156	0.378	0.00345	0.223	0.216	0.504	0.136	4.17e-05	1	0.0911	0.00495	0.000288	0.00903	0.00137	0.05	0.266	0.728	0.0119	5.5e-05	0.0278	3.7e-15	0.00371	0.683	0.00322	0.0537	0.479	0.000153	0.083	0.123
H1_ES_Cell_UW.H1.ChromatinAccessibility.DS19100.twopass.merge150.wgt10.zgt2.wig.gz	0.0214	6.74e-05	0.158	0.248	0.394	0.814	0.0155	0.0731	0.028	0.188	0.115	0.0201	0.0292	1	0.000407	0.00878	0.163	0.318	0.317	0.00776	0.225	0.0655	0.034	0.756	0.0924	0.625	0.757	0.000546	1	0.349	0.0115	7.03e-05	0.0291	1.58e-06	0.151	0.935	0.373	0.00237	0.0201	0.0304	1.71e-15	0.000461	0.225	0.00206	0.274	0.251	0.000252	0.328	0.00509
H9_ES_Cell_UW.H9.ChromatinAccessibility.DS18517.twopass.merge150.wgt10.zgt2.wig.gz	0.00896	0.00299	0.00311	0.116	0.0198	0.714	0.0859	0.0921	0.0598	0.0395	0.322	0.0526	0.395	0.889	0.00425	8.94e-05	0.58	0.321	0.608	0.0054	0.325	0.483	0.0192	0.422	0.105	0.125	0.581	4.17e-05	0.662	0.163	0.0388	0.000176	0.00242	0.00481	0.663	0.62	0.373	0.258	0.0024	0.0471	3.99e-13	0.0364	0.74	0.00527	0.0763	0.214	0.0102	0.21	0.38
H9_ES_Cell_UW.H9.ChromatinAccessibility.DS18522.twopass.merge150.wgt10.zgt2.wig.gz	0.0278	0.00262	0.0318	0.157	0.311	0.646	0.00866	0.397	0.0195	0.0516	0.133	0.00689	0.345	1	0.00031	0.00279	0.138	0.29	0.346	0.0134	0.317	1	0.0463	0.599	0.135	0.489	0.372	0.000794	1	0.278	0.0851	2.26e-05	0.00424	0.00135	0.261	0.239	0.541	0.0429	0.00795	0.00335	1.12e-15	0.0945	0.657	0.00197	0.0381	0.389	0.00067	0.0832	0.00254
Mesenchymal_Stem_Cells_ES_Cell_UW.H1_Derived_Mesenchymal_Stem_Cells.ChromatinAccessibility.DS20671.twopass.merge150.wgt10.zgt2.wig.gz	0.00023	1.25e-11	0.0148	0.093	0.00909	0.49	0.0614	0.000118	0.00301	0.0393	0.281	0.000107	0.668	0.767	0.000276	1.47e-06	0.0125	0.0897	0.309	5.19e-05	0.314	0.157	0.0517	0.0922	0.1	0.191	0.76	0.000632	1	0.13	0.107	8.36e-05	0.000437	0.0027	0.00111	0.218	0.499	0.635	0.149	0.464	2.08e-20	0.00815	0.088	0.153	0.448	1	1.45e-06	0.21	0.729
Mesenchymal_Stem_Cells_ES_Cell_UW.H1_Derived_Mesenchymal_Stem_Cells.ChromatinAccessibility.DS21042.twopass.merge150.wgt10.zgt2.wig.gz	0.000294	5e-12	0.0237	0.0478	0.000568	0.238	0.0106	1.88e-05	0.000147	0.0221	0.279	7.36e-05	0.243	0.848	0.00356	7.35e-08	0.00191	0.122	0.32	0.000139	0.256	0.0697	0.0602	0.0371	0.159	0.012	0.661	0.00011	1	0.152	0.156	2.83e-05	0.000174	0.000949	0.000292	0.0875	0.728	0.399	0.124	0.18	2.58e-22	0.000913	0.0415	0.122	0.522	1	1.19e-06	0.743	0.644
Mesendoderm_Cultured_Cells_ES_Cell_UW.H1_BMP4_Derived_Mesendoderm_Cultured_Cells.ChromatinAccessibility.DS18732.twopass.merge150.wgt10.zgt2.wig.gz	0.201	0.000127	0.0555	0.0369	0.741	0.691	0.124	0.00252	0.244	0.324	0.373	0.0182	0.522	0.984	0.000503	0.0369	0.353	0.105	0.62	0.116	0.045	0.425	0.369	0.28	0.0886	0.504	0.167	0.00754	0.623	0.132	0.0176	0.00333	0.000444	0.0296	0.352	0.471	0.542	0.424	0.0205	0.0877	6.72e-08	0.238	0.258	0.0204	0.897	0.777	0.00658	0.598	0.493
Mesendoderm_Cultured_Cells_ES_Cell_UW.H1_BMP4_Derived_Mesendoderm_Cultured_Cells.ChromatinAccessibility.DS19310.twopass.merge150.wgt10.zgt2.wig.gz	0.018	4.77e-05	0.0376	0.0428	0.274	0.703	0.0697	0.0925	0.0159	0.698	0.379	0.000584	0.513	0.984	0.000615	7.3e-05	0.0701	0.114	0.533	0.0205	0.132	0.361	0.0432	0.508	0.0648	0.369	0.0492	0.00576	1	0.0862	0.0103	0.00584	0.000366	0.000205	0.409	0.212	0.728	0.173	0.00356	0.102	1.52e-07	0.019	0.372	0.00154	0.478	0.78	0.000151	0.611	0.536
Neuronal_Progenitor_Cultured_Cells_ES_Cell_UW.H1_Derived_Neuronal_Progenitor_Cultured_Cells.ChromatinAccessibility.DS18739.twopass.merge150.wgt10.zgt2.wig.gz	0.00519	2.95e-06	0.00306	0.0518	0.548	0.599	0.00424	0.386	0.131	0.273	0.346	0.01	0.295	1	0.00014	0.000164	0.198	0.141	0.527	0.00699	0.228	0.285	0.223	0.197	0.101	0.504	0.291	0.00025	1	0.13	0.0247	5.28e-05	0.00228	2.85e-05	0.0602	0.182	0.713	0.0715	0.0109	0.00114	3.17e-22	0.00318	0.256	0.00225	0.0217	0.124	1.16e-05	0.049	0.0448
Neuronal_Progenitor_Cultured_Cells_ES_Cell_UW.H1_Derived_Neuronal_Progenitor_Cultured_Cells.ChromatinAccessibility.DS20153.twopass.merge150.wgt10.zgt2.wig.gz	0.0125	0.000144	0.0515	0.0407	0.368	0.599	0.0162	0.0451	0.118	0.0695	0.201	0.000789	0.314	0.984	0.00305	0.00264	0.184	0.158	0.37	0.0149	0.181	0.389	0.236	0.535	0.0326	0.504	0.0131	0.000432	0.623	0.0504	0.13	4.31e-06	0.0005	0.000351	0.102	0.338	0.322	0.00481	0.0024	0.0686	1.53e-17	0.0839	0.584	0.00169	0.0311	0.176	0.000584	0.105	0.00254
Trophoblast_Cultured_Cells_ES_Cell_UW.H1_BMP4_Derived_Trophoblast_Cultured_Cells.ChromatinAccessibility.DS18736.twopass.merge150.wgt10.zgt2.wig.gz	0.0391	0.0498	0.2	0.143	0.388	0.751	0.156	0.102	0.015	0.664	0.0706	5.28e-05	0.422	1	0.00351	0.000116	0.0151	0.309	0.808	0.0324	0.418	0.418	0.426	0.286	0.55	0.639	0.000597	0.00789	1	0.541	0.00379	0.000549	0.0233	0.0598	0.824	0.322	0.713	0.422	0.0548	0.0788	4.47e-07	0.0274	0.258	0.307	0.917	0.707	0.171	0.479	0.942
Trophoblast_Cultured_Cells_ES_Cell_UW.H1_BMP4_Derived_Trophoblast_Cultured_Cells.ChromatinAccessibility.DS19317.twopass.merge150.wgt10.zgt2.wig.gz	0.0312	5.21e-06	0.0237	0.0211	0.415	0.732	0.717	0.0661	0.0562	0.626	0.0882	0.00248	0.716	1	0.132	0.0243	0.0861	0.0403	0.239	0.0125	0.0476	1	0.235	0.28	0.057	0.856	0.0487	0.000333	1	0.475	0.0502	7.73e-05	0.00725	0.00759	0.00835	0.174	0.694	0.648	0.0285	0.0731	6.17e-07	0.00544	0.221	0.258	0.979	0.0759	0.0919	0.297	0.919
Fetal_Adrenal_Gland_Fetal_Adrenal_UW.Fetal_Adrenal_Gland.ChromatinAccessibility.H-22662.DS12528.twopass.merge150.wgt10.zgt2.wig.gz	0.0129	4.21e-06	0.0176	0.0548	0.0121	0.883	0.000133	0.00392	0.151	0.179	0.156	0.00172	0.383	0.984	1.52e-06	7.56e-05	0.111	0.101	0.314	0.0167	0.216	0.0655	0.0199	0.132	0.00417	0.604	0.777	0.0012	1	0.243	0.147	3.39e-05	0.0102	2.5e-08	0.0106	0.337	0.728	0.411	0.04	0.252	3.31e-13	0.197	0.16	0.0171	0.108	0.8	5.62e-06	0.179	0.679
Fetal_Adrenal_Gland_Fetal_Adrenal_UW.Fetal_Adrenal_Gland.ChromatinAccessibility.H-23769.DS17319.twopass.merge150.wgt10.zgt2.wig.gz	0.00375	1.19e-08	0.0618	0.0894	0.0122	0.648	0.000199	0.089	0.0211	0.677	0.0875	0.000903	0.532	0.532	1.52e-06	1.94e-06	0.0192	0.282	0.585	0.00255	0.4	0.127	0.00714	0.286	0.0338	0.489	0.487	0.0078	1	0.39	0.147	0.000164	0.0509	4.19e-07	0.104	0.294	0.52	0.354	0.0546	0.128	3.25e-15	0.0163	0.072	0.33	0.127	0.8	9.41e-05	0.18	0.437
Fetal_Adrenal_Gland_Fetal_Adrenal_UW.Fetal_Adrenal_Gland.ChromatinAccessibility.H-24409.DS20343.twopass.merge150.wgt10.zgt2.wig.gz	0.000685	9.69e-09	0.039	0.0135	0.0464	0.675	0.000175	0.00139	0.08	0.163	0.328	0.0354	0.668	0.984	4.86e-05	0.000241	0.06	0.105	0.109	0.00098	0.23	0.253	0.0138	0.291	0.469	0.489	0.876	0.000835	1	0.39	0.262	0.00195	0.0121	4.15e-07	0.00932	0.422	0.728	0.301	0.345	0.442	3.66e-08	0.0908	0.48	0.00631	0.0381	0.8	6.5e-05	0.164	0.667
Fetal_Brain_Fetal_Brain_UW.Fetal_Brain.ChromatinAccessibility.H-22510.DS11872.twopass.merge150.wgt10.zgt2.wig.gz	0.0972	0.0238	0.043	0.253	0.397	0.691	0.0109	0.0967	0.0796	0.00613	0.0534	0.00505	0.566	0.928	0.0484	0.542	0.0779	0.315	0.638	0.0833	0.464	1	0.124	0.378	0.396	0.695	0.466	0.241	1	0.963	0.398	0.0349	0.0299	0.0625	0.811	0.21	0.668	6.83e-08	0.0925	0.000499	4.26e-10	0.538	0.262	0.188	0.0232	0.717	0.0633	0.0493	3.33e-05
Fetal_Brain_Fetal_Brain_UW.Fetal_Brain.ChromatinAccessibility.H-22510.DS11877.twopass.merge150.wgt10.zgt2.wig.gz	0.0625	0.00736	0.0606	0.21	0.786	0.703	0.124	0.357	0.0233	0.0172	0.105	0.00966	0.345	0.956	0.168	0.738	0.0209	0.282	0.685	0.0559	0.4	1	0.618	0.404	0.53	0.948	0.748	0.252	1	0.796	0.49	0.0103	0.161	0.257	0.382	0.267	0.437	0.00087	0.119	0.0114	9.24e-08	0.117	0.315	0.258	0.193	0.715	0.0657	0.0666	0.00334
Fetal_Brain_Fetal_Brain_UW.Fetal_Brain.ChromatinAccessibility.H-22911.DS14464.twopass.merge150.wgt10.zgt2.wig.gz	0.0207	0.0291	0.0204	0.598	0.619	0.966	0.0121	0.159	0.121	0.0178	0.229	0.0228	0.287	1	0.0166	0.417	0.124	0.652	0.759	0.00887	0.793	0.557	0.748	0.432	0.914	0.825	0.0679	0.0131	1	0.998	0.142	0.0444	0.0566	0.339	0.187	0.455	0.499	0.000231	0.183	0.000638	1.46e-08	0.692	0.394	0.314	0.0288	0.303	0.0113	0.00499	4.75e-05
Fetal_Brain_Fetal_Brain_UW.Fetal_Brain.ChromatinAccessibility.H-23266.DS14717.twopass.merge150.wgt10.zgt2.wig.gz	0.194	0.0117	0.00302	0.203	0.985	0.875	0.376	0.353	0.881	0.0166	0.361	0.0853	0.712	1	0.106	0.452	0.699	0.341	0.62	0.204	0.455	0.631	0.876	0.427	0.769	0.944	0.202	0.207	1	0.963	0.123	0.23	0.156	0.0502	0.414	0.718	1	0.0705	0.0209	0.00724	0.00117	0.415	0.698	0.0573	0.0381	0.46	0.0706	0.000911	0.0492
Fetal_Brain_Fetal_Brain_UW.Fetal_Brain.ChromatinAccessibility.H-23266.DS14718.twopass.merge150.wgt10.zgt2.wig.gz	0.0861	0.000903	0.0181	0.163	0.646	0.834	0.0559	0.567	0.106	0.00647	0.0863	0.0123	0.459	1	0.00305	0.119	0.159	0.288	0.809	0.175	0.4	0.544	0.967	0.382	0.265	0.944	0.163	0.0441	1	0.786	0.047	0.0475	0.0331	0.00302	0.646	0.565	0.728	0.258	0.345	0.0512	2.94e-06	0.652	0.305	0.031	0.0381	0.783	0.000268	0.0264	0.0125
Fetal_Brain_Fetal_Brain_UW.Fetal_Brain.ChromatinAccessibility.H-23284.DS14803.twopass.merge150.wgt10.zgt2.wig.gz	0.172	0.0114	1	0.598	0.437	0.872	0.0226	0.0445	0.0365	0.0173	0.0835	0.0343	0.513	0.958	0.0127	0.339	0.0391	0.651	0.471	0.144	0.643	1	0.816	0.552	0.944	0.589	0.215	0.441	1	0.858	0.743	0.0201	0.0434	0.013	0.241	0.218	1	4.34e-06	0.0302	0.000464	2.23e-10	0.698	0.54	0.0632	0.173	0.324	0.00609	0.2	1.5e-09
Fetal_Brain_Fetal_Brain_UW.Fetal_Brain.ChromatinAccessibility.H-23284.DS14815.twopass.merge150.wgt10.zgt2.wig.gz	0.018	0.0314	0.0846	0.6	0.928	0.966	0.0659	0.152	0.0385	0.00284	0.137	0.00487	0.516	1	0.0948	0.0213	0.0218	0.664	0.871	0.0196	0.789	0.512	0.614	0.434	0.516	0.765	0.225	0.0385	1	0.732	0.55	0.0451	0.00342	0.0113	0.0717	0.577	1	4.53e-05	0.0365	0.00245	2.23e-10	0.872	0.381	0.156	0.232	0.304	0.00413	0.0117	3.99e-06
Fetal_Brain_Fetal_Brain_UW.Fetal_Brain.ChromatinAccessibility.H-23399.DS15453.twopass.merge150.wgt10.zgt2.wig.gz	0.00633	0.0761	0.00302	0.848	0.962	0.691	0.009	0.24	0.253	0.0028	0.217	0.0337	0.42	1	0.0122	0.242	0.347	0.78	0.56	0.00814	0.928	0.674	0.48	0.223	0.68	0.884	0.32	0.00273	1	0.959	0.216	0.0519	0.0143	0.00302	0.445	0.227	0.728	0.0012	0.122	0.0366	1.72e-05	0.538	0.227	0.0733	0.000545	0.487	0.00578	0.000817	1.5e-09
Fetal_Brain_Fetal_Brain_UW.Fetal_Brain.ChromatinAccessibility.H-23548.DS16302.twopass.merge150.wgt10.zgt2.wig.gz	0.122	0.00931	0.00454	0.366	0.245	0.988	0.145	0.0195	0.666	0.00647	0.141	0.12	0.76	0.984	0.0414	0.32	0.418	0.528	0.581	0.135	0.66	0.702	0.532	0.498	0.53	0.772	0.76	0.102	1	0.963	0.602	0.104	0.101	0.0668	0.57	0.538	1	7.5e-05	0.198	0.00833	1.84e-07	0.816	0.512	0.349	0.0228	0.8	0.262	0.0296	4.43e-09
Fetal_Brain_Fetal_Brain_UW.Fetal_Brain.ChromatinAccessibility.H-24279.DS20221.twopass.merge150.wgt10.zgt2.wig.gz	0.0577	0.000915	0.00311	0.121	0.488	0.752	0.0287	0.0205	0.0588	0.00647	0.0137	0.0345	0.645	0.88	0.0281	0.209	0.06	0.175	0.606	0.0348	0.259	0.538	0.179	0.327	0.131	0.795	0.0157	0.102	1	0.706	0.149	0.00159	0.00726	0.000917	0.187	0.265	0.728	8.76e-05	0.00076	0.000456	3.62e-10	0.536	0.469	0.0842	0.000194	0.446	1.81e-05	0.00466	7.95e-06
Fetal_Brain_Fetal_Brain_UW.Fetal_Brain.ChromatinAccessibility.H-24297.DS20226.twopass.merge150.wgt10.zgt2.wig.gz	0.0149	0.00131	0.0142	0.416	0.306	0.898	0.00941	0.00931	0.162	0.00647	0.107	0.0367	0.166	1	0.00911	0.00981	0.115	0.755	0.683	0.0163	0.856	1	0.189	0.623	0.594	0.863	0.217	0.0429	1	0.905	0.509	0.00549	0.000765	0.00634	0.128	0.311	0.72	6.08e-07	0.00974	0.00171	2.69e-12	0.555	0.425	0.0774	0.0088	0.783	0.000803	0.0356	1.5e-09
Fetal_Brain_Fetal_Brain_UW.Fetal_Brain.ChromatinAccessibility.H-24381.DS20231.twopass.merge150.wgt10.zgt2.wig.gz	0.0701	0.00228	0.00311	0.525	0.801	0.897	0.0346	0.047	0.0975	0.00647	0.0726	0.00433	0.391	1	0.0125	0.25	0.06	0.586	0.808	0.12	0.827	0.511	0.681	0.365	0.475	0.852	0.41	0.0627	1	0.962	0.216	0.0106	0.0153	0.00672	0.325	0.333	1	1.19e-05	0.00411	0.0183	1.94e-09	0.608	0.422	0.171	0.000194	0.777	0.0023	0.111	3.99e-06
Fetal_Heart_Fetal_Heart_UW.Fetal_Heart.ChromatinAccessibility.H-22662.DS12531.twopass.merge150.wgt10.zgt2.wig.gz	0.347	4.18e-08	0.0555	0.042	0.0714	0.706	0.000405	0.000403	0.17	0.134	0.104	0.00564	0.388	0.533	0.000538	5.6e-07	0.0456	0.18	0.762	0.202	0.249	0.423	0.0179	0.000188	0.221	0.745	0.0628	0.251	1	0.0277	0.0412	0.00376	1.11e-13	3.84e-06	0.000407	0.227	0.728	0.142	0.103	0.032	1.87e-21	0.149	0.258	0.0204	0.499	0.126	3.3e-05	0.0463	0.654
Fetal_Heart_Fetal_Heart_UW.Fetal_Heart.ChromatinAccessibility.H-22727.DS12810.twopass.merge150.wgt10.zgt2.wig.gz	0.175	4.15e-07	0.0192	0.555	0.0266	0.801	0.00592	5.69e-05	0.0523	0.0395	0.072	0.0111	0.422	0.889	0.00103	1.65e-07	0.057	0.502	0.892	0.109	0.717	0.0824	0.139	0.000393	0.259	0.765	0.292	0.00307	1	0.0396	0.068	0.0048	2.62e-15	4.17e-05	4.06e-05	0.254	0.728	0.422	0.0578	0.0262	1.57e-15	0.428	0.16	0.013	0.425	0.446	6.46e-07	0.147	0.919
Fetal_Heart_Fetal_Heart_UW.Fetal_Heart.ChromatinAccessibility.H-23468.DS15839.twopass.merge150.wgt10.zgt2.wig.gz	0.302	8.41e-08	0.0092	0.034	0.641	0.789	0.000713	0.000129	0.0491	0.289	0.279	0.018	0.422	0.928	5.27e-05	8.3e-06	0.0205	0.251	0.644	0.15	0.231	0.611	0.189	0.000188	0.0837	0.504	0.458	0.013	1	0.0668	0.109	0.0187	2.64e-11	2.14e-07	0.00352	0.0242	0.437	0.258	0.00543	0.247	2.74e-17	0.648	0.133	0.00524	0.38	0.552	0.000134	0.101	0.553
Fetal_Heart_Fetal_Heart_UW.Fetal_Heart.ChromatinAccessibility.H-23500.DS16018.twopass.merge150.wgt10.zgt2.wig.gz	0.252	9.23e-06	0.0662	0.184	0.422	0.82	0.00427	0.00575	0.255	0.0454	0.121	0.024	0.532	0.992	0.00168	6.33e-06	0.0852	0.689	0.829	0.103	0.647	0.156	0.129	4.21e-06	0.504	0.785	0.521	0.0219	1	0.27	0.123	0.0227	1.46e-12	3.33e-05	0.00109	0.218	0.373	0.263	0.326	0.266	4.29e-17	0.179	0.524	0.000799	0.647	0.519	3.34e-06	0.118	0.832
Fetal_Heart_Fetal_Heart_UW.Fetal_Heart.ChromatinAccessibility.H-23524.DS16146.twopass.merge150.wgt10.zgt2.wig.gz	0.0725	6.09e-08	0.0362	0.00887	0.0777	0.834	0.00106	0.00457	0.146	0.109	0.285	0.0028	0.391	0.767	0.00137	1.12e-06	0.137	0.106	0.663	0.0254	0.112	0.592	0.0354	2.89e-05	0.138	0.81	0.0928	0.00439	1	0.0605	0.121	0.00422	3.84e-11	2.27e-06	7.22e-05	0.425	0.728	0.165	0.381	0.0336	1.48e-18	0.164	0.278	0.000498	0.596	0.22	2.57e-06	0.356	0.729
Fetal_Heart_Fetal_Heart_UW.Fetal_Heart.ChromatinAccessibility.H-23589.DS16500.twopass.merge150.wgt10.zgt2.wig.gz	0.386	3.49e-06	0.184	0.195	0.541	0.787	0.0334	0.00177	0.187	0.152	0.333	0.0313	0.516	0.883	0.000385	2.59e-05	0.18	0.332	0.845	0.285	0.408	0.511	0.177	0.00598	0.475	0.695	0.825	0.0571	1	0.244	0.49	0.00419	2.75e-13	0.000166	0.000336	0.758	0.774	0.42	0.412	0.427	1.49e-09	0.552	0.18	0.0118	0.444	0.871	2.73e-06	0.0978	0.649
Fetal_Heart_Fetal_Heart_UW.Fetal_Heart.ChromatinAccessibility.H-23604.DS16582.twopass.merge150.wgt10.zgt2.wig.gz	0.302	2.02e-07	0.00603	0.00739	0.0868	0.739	0.00062	0.000276	0.244	0.103	0.271	0.00588	0.357	0.523	7.05e-05	7.26e-07	0.0771	0.135	0.747	0.124	0.134	0.565	0.0121	0.000188	0.877	0.738	0.332	0.00754	1	0.00834	0.216	0.000707	2.17e-16	1.57e-05	8.86e-05	0.163	0.728	0.411	0.154	0.103	9.76e-23	0.445	0.259	0.000729	0.467	0.204	6.87e-10	0.316	0.97
Fetal_Heart_Fetal_Heart_UW.Fetal_Heart.ChromatinAccessibility.H-23617.DS16621.twopass.merge150.wgt10.zgt2.wig.gz	0.498	2.38e-07	0.0725	0.0486	0.429	0.691	0.00393	0.000741	0.187	0.121	0.237	0.00169	0.38	1	0.000385	1.48e-05	0.189	0.181	0.875	0.364	0.321	0.67	0.101	6.28e-05	0.544	0.852	0.296	0.0758	1	0.0745	0.216	0.0043	1.37e-14	1.46e-06	0.000147	0.333	0.728	0.557	0.38	0.21	9.1e-18	0.308	0.589	0.0012	0.368	0.812	3.2e-09	0.124	0.795
Fetal_Heart_Fetal_Heart_UW.Fetal_Heart.ChromatinAccessibility.H-23663.DS16819.twopass.merge150.wgt10.zgt2.wig.gz	0.0978	6.84e-10	0.0148	0.0576	0.0224	0.544	9.4e-05	3.81e-06	0.0203	0.0232	0.31	0.000418	0.162	0.39	1.28e-05	3.35e-08	0.00772	0.205	0.696	0.0728	0.268	0.174	0.00892	3.22e-05	0.0794	0.852	0.0795	0.0102	1	0.0299	0.0529	0.0012	2.53e-15	1.34e-08	0.000407	0.11	0.728	0.641	0.048	0.116	1.69e-22	0.0236	0.214	0.00324	0.157	0.088	2.17e-08	0.109	0.729
Fetal_Heart_Fetal_Heart_UW.Fetal_Heart.ChromatinAccessibility.H-23744.DS19431.twopass.merge150.wgt10.zgt2.wig.gz	0.205	3.59e-07	0.03	0.0581	0.0945	0.751	0.00012	2.87e-07	0.183	0.107	0.189	0.0369	0.383	0.913	2.31e-05	2.45e-06	0.132	0.383	0.845	0.0832	0.354	0.0915	0.0142	0.00236	0.122	0.8	0.376	0.0605	1	0.0928	0.0922	0.0382	8.48e-13	1.64e-05	6.25e-05	0.38	0.543	0.224	0.0925	0.312	1.53e-17	0.229	0.133	0.00154	0.288	0.214	4.35e-08	0.125	0.729
Fetal_Heart_Fetal_Heart_UW.Fetal_Heart.ChromatinAccessibility.H-24042.DS19427.twopass.merge150.wgt10.zgt2.wig.gz	0.0583	1.75e-08	0.038	0.0767	0.182	0.82	0.000773	2.4e-05	0.0717	0.106	0.0827	0.000369	0.37	0.767	1.57e-05	7.24e-08	0.0252	0.334	0.609	0.0396	0.412	0.0962	0.0789	5.58e-06	0.0514	0.65	0.261	0.0117	1	0.0485	0.0376	0.00216	9.02e-16	8.7e-07	8.86e-05	0.606	0.728	0.33	0.198	0.0731	2.89e-21	0.677	0.175	0.0153	0.353	0.211	2.77e-09	0.164	0.675
Fetal_Intestine_Large_Fetal_Intestine,_Large_UW.Fetal_Intestine_Large.ChromatinAccessibility.H-23500.DS16027.twopass.merge150.wgt10.zgt2.wig.gz	0.162	7.69e-10	0.00302	0.00473	0.0137	0.643	0.00081	0.00674	0.00389	0.0102	0.0398	0.00117	0.134	0.984	0.00018	2.45e-06	0.00191	0.0309	0.486	0.171	0.0882	0.137	0.0248	0.537	0.0414	0.606	0.0852	0.0189	1	0.211	0.0617	2.62e-05	0.0153	4.79e-07	0.000133	0.149	0.728	0.634	0.00388	0.00724	2.88e-19	0.00714	0.775	0.000799	0.353	0.0759	4.35e-07	0.21	0.517
Fetal_Intestine_Large_Fetal_Intestine,_Large_UW.Fetal_Intestine_Large.ChromatinAccessibility.H-23524.DS16164.twopass.merge150.wgt10.zgt2.wig.gz	0.0591	7.57e-09	0.397	0.0297	0.00602	0.0957	0.00451	0.000224	0.042	0.199	0.0188	0.0036	0.299	0.984	7.05e-05	2.61e-05	0.111	0.0856	0.558	0.0753	0.118	0.0655	0.189	0.197	0.0398	0.609	0.129	0.00897	1	0.39	0.0877	4.21e-06	0.0931	2.87e-06	0.0294	0.267	0.728	0.422	0.058	0.0132	1.09e-19	0.011	0.129	0.00151	0.313	0.0764	2.46e-07	0.128	0.815
Fetal_Intestine_Large_Fetal_Intestine,_Large_UW.Fetal_Intestine_Large.ChromatinAccessibility.H-23604.DS16563.twopass.merge150.wgt10.zgt2.wig.gz	0.0197	1.85e-08	0.00468	0.0312	0.0138	0.588	0.00226	4.21e-05	0.0843	0.0173	0.0677	0.00473	0.322	0.887	0.00105	1.89e-06	0.0878	0.0944	0.492	0.0477	0.141	0.0697	0.166	0.103	0.0985	0.606	0.283	0.000632	1	0.541	0.0679	1.73e-07	0.0232	0.000949	0.0289	0.297	0.728	0.732	0.119	0.0723	4.71e-17	0.0137	0.104	0.0256	0.64	0.0359	2.17e-05	0.23	0.984
Fetal_Intestine_Large_Fetal_Intestine,_Large_UW.Fetal_Intestine_Large.ChromatinAccessibility.H-23744.DS17094.twopass.merge150.wgt10.zgt2.wig.gz	0.0411	4.9e-09	0.386	0.0211	0.0224	0.605	0.00897	0.0552	0.0818	0.0908	0.0264	0.00033	0.203	0.727	0.000587	2.92e-07	0.135	0.0911	0.124	0.0269	0.191	0.0655	0.127	0.28	0.0399	0.662	0.136	0.0087	1	0.418	0.0617	1.47e-06	0.0544	0.00335	0.000133	0.161	0.542	0.538	0.0539	0.209	4.31e-16	0.00634	0.292	0.00197	0.586	0.0359	1.83e-06	0.0794	0.919
Fetal_Intestine_Large_Fetal_Intestine,_Large_UW.Fetal_Intestine_Large.ChromatinAccessibility.H-23758.DS17157.twopass.merge150.wgt10.zgt2.wig.gz	0.145	2.28e-08	0.00996	0.0239	0.0106	0.505	0.0163	0.0203	0.00388	0.00647	0.0795	0.00242	0.957	0.977	0.0251	0.000859	0.0151	0.0684	0.309	0.23	0.172	0.412	0.271	0.286	0.41	0.504	0.458	0.018	1	0.9	0.04	1.62e-05	0.00258	0.00849	0.000484	0.403	0.72	0.72	0.238	0.227	1.66e-11	0.00453	0.133	0.0332	0.536	0.0418	3.3e-05	0.337	0.991
Fetal_Intestine_Large_Fetal_Intestine,_Large_UW.Fetal_Intestine_Large.ChromatinAccessibility.H-23769.DS17313.twopass.merge150.wgt10.zgt2.wig.gz	0.0902	2.32e-07	0.384	0.138	0.6	0.544	0.0431	0.00023	0.0132	0.184	0.0784	0.00108	0.29	0.984	0.00577	0.00856	0.0199	0.279	0.146	0.095	0.477	0.174	0.152	0.273	0.211	0.65	0.416	0.000794	0.662	0.727	0.106	0.000175	0.0765	0.00348	0.0225	0.267	0.542	0.62	0.0609	0.198	2.09e-08	0.0627	0.249	0.00748	0.499	0.0359	2.34e-06	0.715	0.984
Fetal_Intestine_Large_Fetal_Intestine,_Large_UW.Fetal_Intestine_Large.ChromatinAccessibility.H-23808.DS17422.twopass.merge150.wgt10.zgt2.wig.gz	0.0173	1.23e-08	0.00502	0.00332	0.0126	0.505	0.000529	0.0201	0.00761	0.0516	0.00819	0.000504	0.0803	0.805	9.35e-06	4.58e-07	0.0148	0.0237	0.146	0.0205	0.0734	0.0962	0.127	0.293	0.0688	0.765	0.0855	0.00929	1	0.244	0.0115	4.78e-06	0.00342	1.97e-07	7.65e-05	0.149	0.0998	0.411	0.000104	0.0374	5.26e-18	0.00378	0.177	0.00649	0.21	0.171	2.41e-06	0.0709	0.729
Fetal_Intestine_Large_Fetal_Intestine,_Large_UW.Fetal_Intestine_Large.ChromatinAccessibility.H-23833.DS17462.twopass.merge150.wgt10.zgt2.wig.gz	0.0215	6.14e-10	0.415	0.0243	0.0945	0.675	0.00115	0.00293	0.135	0.463	0.0487	0.0109	0.349	0.312	0.00472	0.000188	0.202	0.0677	0.0851	0.00686	0.097	0.191	0.132	0.286	0.0795	0.542	0.491	0.00149	1	0.421	0.2	2.71e-06	0.0815	0.00346	0.00207	0.319	0.728	0.794	0.0783	0.0493	4.15e-15	0.00378	0.581	0.00548	0.193	0.0764	8.69e-05	0.458	0.984
Fetal_Intestine_Large_Fetal_Intestine,_Large_UW.Fetal_Intestine_Large.ChromatinAccessibility.H-23855.DS17502.twopass.merge150.wgt10.zgt2.wig.gz	0.0902	6.14e-10	0.224	0.0199	0.0126	0.0862	0.000103	0.0104	6.53e-08	0.0243	0.143	2.43e-11	0.00398	0.412	0.000929	0.344	1.52e-06	0.0133	0.0193	0.146	0.0391	1	1.1e-10	0.383	0.174	0.0124	0.775	0.0817	1	4.74e-06	0.0679	2.78e-13	0.201	0.0722	0.892	0.142	0.437	0.411	0.00678	0.0114	3.36e-11	4.16e-05	0.072	0.0215	0.326	1	0.0209	0.326	0.0953
Fetal_Intestine_Large_Fetal_Intestine,_Large_UW.Fetal_Intestine_Large.ChromatinAccessibility.H-23887.DS17647.twopass.merge150.wgt10.zgt2.wig.gz	0.0538	1.17e-07	0.0224	0.00903	0.0913	0.673	0.000405	0.00653	0.0603	0.0102	0.0107	0.00211	0.512	0.533	0.000692	7.35e-06	0.0982	0.0286	0.00356	0.0706	0.0718	0.471	0.06	0.28	0.00252	0.799	0.189	0.00981	1	0.0928	0.0189	4.8e-06	0.0106	0.000107	0.00768	0.377	0.548	0.663	0.0654	0.00724	1.58e-20	0.0304	0.297	0.0242	0.353	0.101	0.000645	0.11	0.964
Fetal_Intestine_Large_Fetal_Intestine,_Large_UW.Fetal_Intestine_Large.ChromatinAccessibility.H-23914.DS17748.twopass.merge150.wgt10.zgt2.wig.gz	0.0456	1.08e-10	0.0632	0.0164	0.0126	0.639	0.000682	0.00417	0.0137	0.361	0.0222	0.00035	0.227	1	1.08e-05	8.7e-06	0.0148	0.0753	0.279	0.0945	0.127	0.397	0.0587	0.232	0.0584	0.852	0.0769	0.0067	1	0.226	0.0122	2.29e-07	0.00477	4.7e-06	0.00406	0.187	0.542	0.411	0.03	0.069	2.91e-22	0.00548	0.294	0.000821	0.161	0.0359	7.12e-08	0.14	0.729
Fetal_Intestine_Large_Fetal_Intestine,_Large_UW.Fetal_Intestine_Large.ChromatinAccessibility.H-23941.DS17785.twopass.merge150.wgt10.zgt2.wig.gz	0.174	2.95e-09	0.0471	0.00547	0.0408	0.432	0.0364	0.00187	0.022	0.13	0.101	0.000247	0.376	0.526	0.0117	0.000394	0.0649	0.024	0.369	0.0934	0.0448	0.113	0.00724	0.378	0.0414	0.341	0.00802	0.0543	1	0.0823	0.0723	1.03e-07	0.00476	0.00417	0.00103	0.287	0.728	0.805	0.0392	0.0534	1.63e-12	0.0065	0.227	0.017	0.362	0.057	0.00137	0.196	0.999
Fetal_Intestine_Large_Fetal_Intestine,_Large_UW.Fetal_Intestine_Large.ChromatinAccessibility.H-23964.DS17841.twopass.merge150.wgt10.zgt2.wig.gz	0.0321	3.84e-12	0.0589	0.000476	0.0277	0.514	0.00207	0.000182	0.00741	0.0369	0.0726	0.000967	0.345	0.674	0.000259	1.65e-07	0.0174	0.00614	0.171	0.0309	0.0237	0.0655	0.0214	0.273	0.0342	0.426	0.0327	0.00462	0.918	0.00279	0.000752	2.64e-08	0.0148	1.62e-06	0.00504	0.254	0.499	0.576	5.5e-05	0.135	3.11e-22	0.000315	0.247	0.0042	0.529	0.0612	1.05e-05	0.032	0.991
Fetal_Intestine_Large_Fetal_Intestine,_Large_UW.Fetal_Intestine_Large.ChromatinAccessibility.H-24005.DS17990.twopass.merge150.wgt10.zgt2.wig.gz	0.166	8.26e-12	0.265	0.00587	0.00112	0.249	4.14e-05	0.00343	0.0132	0.0108	0.0387	0.000573	0.221	0.0362	1.52e-06	2.66e-06	0.0137	0.0337	0.0357	0.173	0.0271	0.126	0.000124	0.281	0.0178	0.17	0.0596	0.058	1	0.0596	0.04	5.73e-07	0.00342	1.67e-05	9.77e-05	0.132	0.728	0.394	0.0144	0.038	1.14e-21	0.00499	0.214	0.00457	0.695	0.0759	1.11e-05	0.424	0.535
Fetal_Intestine_Large_Fetal_Intestine,_Large_UW.Fetal_Intestine_Large.ChromatinAccessibility.H-24111.DS18499.twopass.merge150.wgt10.zgt2.wig.gz	0.000316	7.79e-08	0.0145	0.0548	0.0301	0.675	0.000483	0.0249	0.0383	0.219	0.0181	0.0139	0.513	0.984	5.19e-05	0.000353	0.0654	0.192	0.597	0.000245	0.269	0.612	0.25	0.286	0.701	0.338	0.607	0.000835	1	0.349	0.656	9.09e-06	0.0875	0.000126	0.000547	0.538	0.728	0.62	0.272	0.568	9.35e-12	0.0778	0.32	0.00258	0.603	0.0364	1.11e-05	0.135	0.919
Fetal_Intestine_Small_Fetal_Intestine,_Small_UW.Fetal_Intestine_Small.ChromatinAccessibility.H-23604.DS16559.twopass.merge150.wgt10.zgt2.wig.gz	0.0595	2.38e-07	0.0474	0.0408	0.023	0.544	0.00722	0.0587	0.0137	0.0472	0.0303	0.00323	0.148	0.222	0.000102	8.78e-06	0.0563	0.0752	0.19	0.0425	0.156	0.0655	0.224	0.28	0.15	0.481	0.459	0.00373	1	0.33	0.131	2.31e-05	0.0168	0.00499	0.00406	0.149	0.543	0.641	0.082	0.303	3.42e-16	0.0612	0.104	0.0041	0.522	0.0418	5.44e-05	0.34	0.649
Fetal_Intestine_Small_Fetal_Intestine,_Small_UW.Fetal_Intestine_Small.ChromatinAccessibility.H-23640.DS16712.twopass.merge150.wgt10.zgt2.wig.gz	0.143	3.65e-06	0.217	0.00361	0.0219	0.544	0.000488	8.96e-05	0.00301	0.276	0.0415	0.00216	0.478	0.767	0.000105	1.1e-05	0.00706	0.0409	0.0792	0.135	0.124	0.098	0.0228	0.535	0.0985	0.496	0.0795	0.00256	1	0.791	0.0101	1.23e-05	0.0073	1.56e-05	0.0337	0.157	1	0.282	0.0024	0.0508	1.57e-24	0.0163	0.177	0.00322	0.0381	0.00867	2.19e-06	0.306	0.437
Fetal_Intestine_Small_Fetal_Intestine,_Small_UW.Fetal_Intestine_Small.ChromatinAccessibility.H-23663.DS16822.twopass.merge150.wgt10.zgt2.wig.gz	0.0603	2.87e-10	0.0219	0.00464	0.0126	0.49	0.00143	0.00226	0.0682	0.0156	0.038	0.00169	0.314	0.984	0.00154	7.41e-05	0.0267	0.0318	0.331	0.0348	0.0831	0.179	0.0466	0.396	0.149	0.426	0.291	0.00322	1	0.275	0.19	7.63e-07	0.0073	0.00598	0.00255	0.218	0.728	0.732	0.0595	0.0414	1.51e-12	0.0398	0.0902	0.0224	0.444	0.0359	3.7e-07	0.148	0.992
Fetal_Intestine_Small_Fetal_Intestine,_Small_UW.Fetal_Intestine_Small.ChromatinAccessibility.H-23724.DS16975.twopass.merge150.wgt10.zgt2.wig.gz	0.0292	4.42e-11	0.0555	0.00108	0.0184	0.449	0.000294	0.00288	0.00631	0.374	0.0044	0.00185	0.0336	0.859	0.000165	1.52e-05	0.00345	0.017	0.146	0.0183	0.045	0.0655	0.0124	0.286	0.0238	0.65	0.167	0.00235	1	0.0668	0.027	4.2e-06	0.0073	3.3e-06	0.000745	0.149	0.728	0.624	0.00877	0.0777	8.35e-23	0.019	0.347	0.000696	0.2	0.0759	8.27e-08	0.172	0.437
Fetal_Intestine_Small_Fetal_Intestine,_Small_UW.Fetal_Intestine_Small.ChromatinAccessibility.H-23744.DS17092.twopass.merge150.wgt10.zgt2.wig.gz	0.0876	4.37e-09	0.0181	0.0518	0.0703	0.544	0.00012	0.00966	0.0285	0.0715	0.00846	0.000954	0.162	0.872	0.00121	2.98e-06	0.0303	0.135	0.213	0.0992	0.198	0.0655	0.152	0.549	0.0761	0.504	0.094	0.00548	1	0.176	0.0758	6.38e-07	0.00972	0.00119	0.0054	0.171	0.542	0.43	0.00266	0.0716	1.29e-19	0.00777	0.332	0.000955	0.306	0.0759	6.59e-07	0.0471	0.702
Fetal_Intestine_Small_Fetal_Intestine,_Small_UW.Fetal_Intestine_Small.ChromatinAccessibility.H-23758.DS17150.twopass.merge150.wgt10.zgt2.wig.gz	0.0254	8.42e-10	0.335	0.00543	0.0255	0.43	0.0665	0.0271	0.0159	0.0335	0.143	0.00169	0.151	0.868	0.00056	0.000345	0.0725	0.0141	0.309	0.0309	0.0411	0.0655	0.142	0.197	0.0379	0.637	0.0193	0.000612	1	0.727	0.0388	1.47e-06	0.00424	0.000105	0.000171	0.161	0.728	0.576	0.163	0.0633	4.56e-17	5.38e-05	0.16	0.00223	0.353	0.0759	9.51e-07	0.0709	0.634
Fetal_Intestine_Small_Fetal_Intestine,_Small_UW.Fetal_Intestine_Small.ChromatinAccessibility.H-23769.DS17317.twopass.merge150.wgt10.zgt2.wig.gz	0.0674	1.39e-05	0.118	0.0367	0.199	0.626	0.00204	0.00195	0.0132	0.722	0.0398	0.00249	0.163	0.984	0.000313	0.0012	0.0984	0.147	0.171	0.136	0.313	0.179	0.318	0.354	0.481	0.852	0.151	0.00127	1	0.7	0.114	0.000106	0.00988	0.000186	0.031	0.103	0.728	0.604	0.272	0.0336	1.63e-12	0.0161	0.143	0.00216	0.313	0.0359	0.00352	0.196	0.957
Fetal_Intestine_Small_Fetal_Intestine,_Small_UW.Fetal_Intestine_Small.ChromatinAccessibility.H-23808.DS17425.twopass.merge150.wgt10.zgt2.wig.gz	0.218	9.08e-13	0.00364	0.017	2.81e-06	0.0789	0.0014	0.000698	1.89e-07	0.00647	0.258	1.04e-06	0.0543	0.00766	0.000324	0.00923	2.71e-06	0.0314	0.00163	0.229	0.132	0.0655	1.02e-13	0.382	0.161	0.000252	0.478	0.00182	0.102	1.36e-05	0.0526	7.64e-13	0.0855	0.00119	0.29	0.132	0.23	0.529	0.00142	4.19e-05	7.04e-17	3.92e-10	0.114	0.219	0.353	0.8	0.000251	0.257	0.0615
Fetal_Intestine_Small_Fetal_Intestine,_Small_UW.Fetal_Intestine_Small.ChromatinAccessibility.H-23864.DS17844.twopass.merge150.wgt10.zgt2.wig.gz	0.0292	9.88e-11	0.224	0.00264	0.0119	0.605	0.000103	0.000167	0.000424	0.192	0.0377	5.26e-05	0.245	0.468	1.17e-05	1.7e-08	0.00162	0.0181	0.374	0.0398	0.076	0.0655	0.0394	0.316	0.00378	0.606	0.0225	0.00485	1	0.0429	0.0321	7.06e-08	0.00424	3.37e-06	0.00436	0.149	0.542	0.635	5.5e-05	0.0152	5.5e-18	0.0157	0.288	0.00322	0.362	0.0364	6.1e-06	0.0728	0.822
Fetal_Intestine_Small_Fetal_Intestine,_Small_UW.Fetal_Intestine_Small.ChromatinAccessibility.H-23887.DS17643.twopass.merge150.wgt10.zgt2.wig.gz	0.0233	4.02e-09	0.0825	0.00824	0.0654	0.691	0.00522	0.0251	0.0241	0.0914	0.0181	0.00339	0.208	0.292	9e-05	5.97e-06	0.0644	0.0446	0.153	0.00814	0.0779	0.453	0.191	0.412	0.0131	0.365	0.132	0.000794	1	0.23	0.248	2.82e-05	0.00932	2.73e-05	0.0146	0.227	0.728	0.43	0.00826	0.0214	1.36e-12	0.146	0.0828	0.000696	0.522	0.0359	1.16e-05	0.343	0.949
Fetal_Intestine_Small_Fetal_Intestine,_Small_UW.Fetal_Intestine_Small.ChromatinAccessibility.H-23914.DS17763.twopass.merge150.wgt10.zgt2.wig.gz	0.186	8.55e-06	0.0966	0.00461	0.0641	0.75	0.0168	0.00637	0.00781	0.152	0.0784	0.00825	0.345	1	0.0112	0.000437	0.0389	0.0301	0.0798	0.295	0.0816	0.163	0.171	0.325	0.131	0.489	0.106	0.0328	1	0.347	0.0849	2.28e-05	0.136	0.005	0.00161	0.649	0.728	0.62	0.21	0.378	1.34e-10	0.00778	0.407	0.01	0.529	0.0359	2.27e-06	0.738	0.984
Fetal_Intestine_Small_Fetal_Intestine,_Small_UW.Fetal_Intestine_Small.ChromatinAccessibility.H-23941.DS17808.twopass.merge150.wgt10.zgt2.wig.gz	0.218	3.16e-09	0.0555	0.0246	0.0295	0.544	0.00293	0.000129	0.0227	0.0992	0.0377	0.00125	0.125	0.299	4.52e-06	7.82e-09	0.0937	0.0489	0.26	0.241	0.116	0.423	0.0224	0.267	0.00686	0.609	0.00244	0.0109	1	0.0628	0.0158	9.63e-09	0.00501	9.55e-05	0.0006	0.11	0.543	0.411	0.00406	0.0049	9.51e-17	0.00172	0.247	0.0114	0.368	0.0418	1.96e-07	0.411	0.808
Fetal_Intestine_Small_Fetal_Intestine,_Small_UW.Fetal_Intestine_Small.ChromatinAccessibility.H-24111.DS18495.twopass.merge150.wgt10.zgt2.wig.gz	0.0174	3.7e-08	0.00502	0.147	0.42	0.691	0.0235	0.00138	0.0109	0.174	0.0398	0.00483	0.512	0.984	0.00557	3.15e-06	0.0574	0.205	0.558	0.00843	0.291	0.0153	0.379	0.12	0.396	0.8	0.458	0.000217	1	0.273	0.181	1.23e-05	0.0344	0.076	0.000333	0.59	0.728	0.863	0.45	0.482	4.13e-09	0.0479	0.149	0.0361	0.875	0.0721	2.02e-05	0.297	0.988
Fetal_Kidney_Left_Fetal_Kidney_UW.Fetal_Kidney_Left.ChromatinAccessibility.H-23589.DS16446.twopass.merge150.wgt10.zgt2.wig.gz	0.00421	0.000915	0.0362	0.12	0.0233	0.691	0.00115	0.0325	0.435	0.184	0.00707	0.0409	0.828	0.883	0.000613	5.39e-05	0.16	0.109	0.488	0.0025	0.181	0.23	0.337	0.378	0.14	0.423	0.579	0.00201	1	0.289	0.169	0.00274	0.0335	4.68e-05	0.00465	0.544	0.728	0.411	0.351	0.0262	2.86e-14	0.114	0.121	0.0012	0.348	0.8	1.06e-09	0.0341	0.624
Fetal_Kidney_Left_Fetal_Kidney_UW.Fetal_Kidney_Left.ChromatinAccessibility.H-23604.DS16579.twopass.merge150.wgt10.zgt2.wig.gz	0.00116	0.000107	0.00538	0.0879	0.0709	0.544	0.00116	0.0314	0.104	0.13	0.0554	0.0313	0.512	0.947	0.000123	0.00128	0.272	0.185	0.602	0.000896	0.257	0.35	0.0789	0.0954	0.324	0.852	0.232	0.00317	1	0.432	0.33	1.59e-05	0.101	4.85e-07	0.00111	0.267	0.76	0.571	0.259	0.0236	6.59e-18	0.0612	0.177	0.0012	0.288	0.101	2.82e-09	0.0439	0.644
Fetal_Kidney_Left_Fetal_Kidney_UW.Fetal_Kidney_Left.ChromatinAccessibility.H-23640.DS16805.twopass.merge150.wgt10.zgt2.wig.gz	0.00759	5.62e-09	0.00473	0.0243	0.0102	0.691	0.000346	0.158	0.015	0.401	0.00263	0.00805	0.12	0.65	3.28e-06	1.01e-05	0.0389	0.101	0.303	0.006	0.118	0.121	0.203	0.365	0.0414	0.504	0.0104	8.1e-05	1	0.00826	0.0563	1.24e-06	0.0328	5.21e-08	0.000863	0.455	0.542	0.22	0.000154	0.0028	1.09e-28	0.019	0.072	0.000845	0.0723	0.0759	5.36e-11	0.0549	0.247
Fetal_Kidney_Left_Fetal_Kidney_UW.Fetal_Kidney_Left.ChromatinAccessibility.H-23758.DS17140.twopass.merge150.wgt10.zgt2.wig.gz	0.00431	3.87e-07	0.00473	0.0811	0.00294	0.698	0.000319	0.00542	0.0445	0.0908	0.0554	0.0241	0.134	0.885	1.64e-05	0.000212	0.0661	0.183	0.346	0.00654	0.271	0.176	0.0695	0.325	0.259	0.641	0.0492	0.000175	1	0.0524	0.181	2.34e-05	0.0462	5.01e-09	0.0041	0.294	0.728	0.173	0.0302	0.00375	6.86e-19	0.0516	0.072	0.00322	0.136	0.487	1.32e-09	0.0239	0.368
Fetal_Kidney_Left_Fetal_Kidney_UW.Fetal_Kidney_Left.ChromatinAccessibility.H-24089.DS18466.twopass.merge150.wgt10.zgt2.wig.gz	0.000339	3.02e-06	0.0114	0.21	0.131	0.691	0.000373	0.0156	0.144	0.258	0.0136	0.022	0.416	0.532	2.8e-05	0.000238	0.368	0.369	0.26	0.00029	0.468	0.101	0.213	0.224	0.156	0.609	0.0306	4.17e-05	1	0.209	0.295	0.000942	0.0158	7.13e-08	0.0355	0.25	0.728	0.248	0.0347	0.00748	2.39e-19	0.0448	0.379	0.00154	0.157	0.248	1.02e-08	0.0296	0.574
Fetal_Kidney_Right_Fetal_Kidney_UW.Fetal_Kidney_Right.ChromatinAccessibility.H-23435.DS15651.twopass.merge150.wgt10.zgt2.wig.gz	0.0148	1.02e-07	0.0114	0.142	0.0267	0.49	0.000483	0.0019	0.206	0.0559	0.0181	0.0984	0.566	0.445	1.52e-06	1.88e-05	0.272	0.267	0.417	0.0102	0.345	0.116	0.152	0.36	0.174	0.765	0.114	4.17e-05	0.83	0.125	0.0892	0.000248	0.03	1.34e-08	0.0203	0.59	0.46	0.399	0.0374	0.0465	1.67e-14	0.0908	0.0846	0.00108	0.135	0.551	9.87e-09	0.0607	0.522
Fetal_Kidney_Right_Fetal_Kidney_UW.Fetal_Kidney_Right.ChromatinAccessibility.H-23589.DS16441.twopass.merge150.wgt10.zgt2.wig.gz	0.0415	1.29e-09	0.00589	0.0428	0.0115	0.752	0.000655	0.0274	0.0465	0.258	0.0137	0.00059	0.513	1	2.8e-05	0.000379	0.0177	0.0753	0.649	0.0275	0.124	0.23	0.0411	0.396	0.211	0.505	0.136	0.0155	1	0.0429	0.536	1.47e-06	0.0164	3.99e-08	0.0112	0.294	0.728	0.444	0.00877	0.0307	2.86e-19	0.0683	0.262	0.000463	0.21	0.542	5.23e-09	0.00467	0.492
Fetal_Kidney_Right_Fetal_Kidney_UW.Fetal_Kidney_Right.ChromatinAccessibility.H-23640.DS16801.twopass.merge150.wgt10.zgt2.wig.gz	0.00431	2.72e-06	0.00953	0.0297	0.0138	0.794	0.00204	0.00159	0.0769	0.136	0.0105	0.00507	0.422	0.802	3.07e-06	0.000365	0.16	0.0769	0.433	0.00393	0.125	0.0655	0.0491	0.273	0.0608	0.438	0.0928	0.000124	1	0.0391	0.174	0.000146	0.0562	1.4e-06	0.0201	0.212	0.578	0.432	0.00435	0.00734	1.24e-17	0.0388	0.072	0.000696	0.332	0.553	2.89e-08	0.0674	0.723
Fetal_Kidney_Right_Fetal_Kidney_UW.Fetal_Kidney_Right.ChromatinAccessibility.H-23758.DS17144.twopass.merge150.wgt10.zgt2.wig.gz	0.0764	2.25e-07	0.0156	0.129	0.0476	0.49	0.000405	0.0013	0.0995	0.0382	0.00518	0.0182	0.519	0.885	1.52e-06	2.17e-05	0.152	0.174	0.558	0.0488	0.249	0.0655	0.216	0.619	0.0703	0.504	0.0327	0.00242	1	0.273	0.0475	8.29e-05	0.0194	1.6e-10	0.0923	0.187	0.542	0.263	0.00678	0.0254	2.45e-24	0.0164	0.27	0.00151	0.068	0.214	1.85e-09	0.0471	0.195
Fetal_Kidney_Right_Fetal_Kidney_UW.Fetal_Kidney_Right.ChromatinAccessibility.H-24089.DS18463.twopass.merge150.wgt10.zgt2.wig.gz	0.00468	2.72e-06	0.0114	0.104	0.0275	0.691	0.000998	0.000192	0.158	0.115	0.0252	0.0775	0.651	0.928	0.000198	2.68e-05	0.306	0.149	0.581	0.00359	0.22	0.108	0.17	0.398	0.723	0.325	0.0327	0.00486	1	0.152	0.202	0.000308	0.0197	2.89e-08	0.0178	0.675	0.565	0.432	0.0152	0.044	1.39e-19	0.0233	0.104	0.000339	0.325	0.0823	3.67e-09	0.0674	0.247
Fetal_Kidney_Fetal_Kidney_UW.Fetal_Kidney.ChromatinAccessibility.H-22337.DS10986.twopass.merge150.wgt10.zgt2.wig.gz	0.0011	7.23e-10	0.00302	0.0542	0.0451	0.944	0.0203	0.012	0.0153	0.0275	0.121	0.000355	0.121	0.859	4.9e-05	6.34e-05	0.0148	0.101	0.558	0.00138	0.219	0.0655	0.288	0.365	0.0454	0.514	0.508	0.00152	1	0.11	0.0319	0.00276	0.0102	2.85e-05	0.000691	0.149	0.542	0.685	0.0508	0.0262	7.46e-25	0.175	0.422	0.00205	0.848	0.388	1.7e-10	0.105	0.634
Fetal_Kidney_Fetal_Kidney_UW.Fetal_Kidney.ChromatinAccessibility.H-22676.DS12635.twopass.merge150.wgt10.zgt2.wig.gz	0.0157	1.36e-09	0.00454	0.0737	0.00123	0.563	0.000207	0.00177	0.0235	0.13	0.00263	0.00126	0.516	0.532	1.28e-05	0.000105	0.0425	0.117	0.28	0.00376	0.192	0.113	0.0462	0.382	0.156	0.799	0.0492	0.000143	1	0.0876	0.0526	1.33e-05	0.0153	4.06e-06	0.0233	0.142	0.23	0.174	0.00918	0.000755	1.74e-22	0.00145	0.0507	0.000933	0.0381	0.158	5.78e-12	0.00351	0.574
Fetal_Kidney_Fetal_Kidney_UW.Fetal_Kidney.ChromatinAccessibility.H-23524.DS16139.twopass.merge150.wgt10.zgt2.wig.gz	0.0139	2.99e-07	0.0142	0.172	0.0275	0.352	0.000373	0.0293	0.17	0.239	0.0293	0.00925	0.513	0.767	9.01e-05	0.000156	0.16	0.224	0.498	0.00853	0.317	0.125	0.0424	0.382	0.265	0.866	0.0649	0.000124	1	0.177	0.0849	0.00376	0.0128	3.9e-07	0.00238	0.425	0.728	0.71	0.281	0.0205	4.97e-15	0.0115	0.177	0.000363	0.326	0.227	5.09e-07	0.033	0.679
Fetal_Kidney_Fetal_Kidney_UW.Fetal_Kidney.ChromatinAccessibility.H-23663.DS16837.twopass.merge150.wgt10.zgt2.wig.gz	0.00401	1.35e-08	0.028	0.129	0.00587	0.656	0.000295	0.00274	0.0468	0.0917	0.0105	0.001	0.345	0.885	4.52e-06	2.77e-05	0.0103	0.183	0.346	0.003	0.195	0.2	0.214	0.508	0.00906	0.65	0.1	0.00014	1	0.385	0.125	1.2e-05	0.00477	5.21e-08	0.000247	0.293	0.728	0.163	0.0302	0.0238	1.32e-23	0.1	0.149	0.000799	0.202	0.519	3.38e-11	0.0763	0.634
Fetal_Kidney_Fetal_Kidney_UW.Fetal_Kidney.ChromatinAccessibility.H-23855.DS17522.twopass.merge150.wgt10.zgt2.wig.gz	0.00502	0.0002	0.328	0.532	0.371	0.691	0.0486	0.0223	0.261	0.145	0.0264	0.0433	0.357	0.859	5.45e-05	0.000227	0.244	0.577	0.33	0.00376	0.679	0.191	0.386	0.276	0.532	0.498	0.745	0.00074	0.815	0.375	0.334	0.000721	0.118	0.000151	0.00576	0.267	0.602	0.71	0.247	0.144	2.36e-13	0.299	0.208	0.00341	0.236	0.566	7.39e-07	0.0391	0.552
Fetal_Kidney_Fetal_Kidney_UW.Fetal_Kidney.ChromatinAccessibility.H-23914.DS17753.twopass.merge150.wgt10.zgt2.wig.gz	0.0144	2.24e-07	0.00473	0.136	0.000178	0.775	0.00295	0.0111	0.0868	0.363	0.00263	0.0251	0.322	0.854	2.43e-05	1.68e-06	0.0555	0.382	0.274	0.00215	0.482	0.108	0.0247	0.357	0.0134	0.489	0.00083	0.000436	0.551	0.391	0.0115	1.85e-06	0.258	1.06e-06	0.000677	0.425	0.287	0.335	5.5e-05	0.00179	8.48e-27	0.0116	0.59	0.000363	0.112	0.0759	1.84e-10	0.0709	0.396
Fetal_Kidney_Fetal_Kidney_UW.Fetal_Kidney.ChromatinAccessibility.H-24507.DS20564.twopass.merge150.wgt10.zgt2.wig.gz	0.0595	3.68e-08	0.0325	0.0296	0.0126	0.589	0.000526	0.147	0.0335	0.152	0.00263	0.0337	0.78	0.622	2.31e-05	3.03e-07	0.06	0.0503	0.205	0.0304	0.134	0.214	0.0147	0.516	0.212	0.691	0.236	0.0217	1	0.0342	0.288	1.88e-05	0.0149	2.5e-08	0.0055	0.243	0.728	0.401	0.269	0.108	6.56e-20	0.0498	0.0428	0.000729	0.21	0.158	2.42e-10	0.0341	0.383
Fetal_Lung_Left_Fetal_Lung_UW.Fetal_Lung_Left.ChromatinAccessibility.H-23435.DS15637.twopass.merge150.wgt10.zgt2.wig.gz	0.00214	7.16e-12	0.0142	0.0129	0.0331	0.184	0.00302	0.00064	0.0152	0.219	0.0942	0.000126	0.513	0.523	0.00158	3.96e-05	0.00969	0.0168	0.0824	0.000632	0.0216	0.0655	0.0253	0.286	0.0216	0.423	0.68	4.17e-05	1	0.32	0.489	1.03e-07	0.0481	0.000146	0.000502	0.0972	0.542	0.507	0.285	0.0474	5.39e-20	0.157	0.086	0.031	0.587	0.227	3.56e-10	0.0463	0.801
Fetal_Lung_Left_Fetal_Lung_UW.Fetal_Lung_Left.ChromatinAccessibility.H-23604.DS16570.twopass.merge150.wgt10.zgt2.wig.gz	0.00182	1.15e-08	0.069	0.00824	0.0617	0.49	0.000405	0.000717	0.0105	0.101	0.1	0.000694	0.661	0.767	0.000494	3.04e-06	0.00595	0.028	0.0417	0.000632	0.045	0.148	0.0117	0.274	0.0162	0.623	0.572	0.00204	1	0.0248	0.572	7.85e-06	0.0017	2.63e-06	0.000334	0.157	0.543	0.593	0.216	0.00148	9.93e-21	0.21	0.091	0.00134	0.747	0.227	4.85e-09	0.0214	0.437
Fetal_Lung_Left_Fetal_Lung_UW.Fetal_Lung_Left.ChromatinAccessibility.H-23640.DS18170.twopass.merge150.wgt10.zgt2.wig.gz	0.000844	3.85e-16	0.00302	0.000161	0.0187	0.544	6.29e-06	3.08e-05	0.00589	0.0987	0.0802	0.000249	0.395	0.127	3.5e-05	9.78e-09	0.00263	0.000148	0.339	0.000754	0.000741	0.0921	0.000124	0.28	0.00578	0.54	0.388	0.00299	1	0.0108	0.0526	6.65e-10	0.000529	4.59e-08	0.00238	0.161	0.39	0.173	0.0453	0.00393	7.53e-28	0.118	0.072	0.00299	0.677	0.0418	4.28e-10	0.0275	0.383
Fetal_Lung_Left_Fetal_Lung_UW.Fetal_Lung_Left.ChromatinAccessibility.H-23744.DS17105.twopass.merge150.wgt10.zgt2.wig.gz	0.00477	1.77e-08	0.0576	0.0453	0.0383	0.505	0.000312	0.00198	0.00722	0.0951	0.0744	0.000386	0.395	0.526	0.000132	3.14e-05	0.00153	0.0762	0.205	0.00726	0.0779	0.116	0.0321	0.372	0.0251	0.765	0.136	0.00115	1	0.243	0.138	1.54e-06	0.000196	3.82e-06	0.000133	0.171	0.728	0.118	0.157	0.00796	1.33e-23	0.0641	0.0902	0.00125	0.202	0.227	4.62e-11	0.000834	0.222
Fetal_Lung_Left_Fetal_Lung_UW.Fetal_Lung_Left.ChromatinAccessibility.H-23758.DS17154.twopass.merge150.wgt10.zgt2.wig.gz	0.0346	1.48e-12	0.0228	0.0243	0.0309	0.505	0.0038	0.000922	0.00504	0.0727	0.137	0.000325	0.162	0.111	0.000122	3.62e-06	0.00234	0.0661	0.481	0.0254	0.0726	0.351	0.0281	0.197	0.00572	0.701	0.491	0.00296	1	0.0536	0.644	9.25e-07	0.000508	3.18e-06	0.000239	0.181	0.608	0.263	0.262	0.00114	7.08e-21	0.336	0.0428	0.000498	0.529	0.303	7.45e-09	0.0213	0.396
Fetal_Lung_Left_Fetal_Lung_UW.Fetal_Lung_Left.ChromatinAccessibility.H-23833.DS17464.twopass.merge150.wgt10.zgt2.wig.gz	0.00386	1.07e-11	0.0114	0.000916	0.0335	0.639	0.000171	7.97e-05	0.0174	0.0191	0.187	3.41e-05	0.42	0.767	0.0006	9.78e-09	0.0101	0.0133	0.0392	0.00543	0.0158	0.116	0.00942	0.0558	0.0033	0.504	0.213	0.0057	1	0.00611	0.458	1.16e-08	0.000437	4.15e-07	0.00254	0.103	0.728	0.263	0.0154	0.00254	6.19e-27	0.179	0.104	0.00831	0.529	0.227	3.31e-11	0.0117	0.416
Fetal_Lung_Left_Fetal_Lung_UW.Fetal_Lung_Left.ChromatinAccessibility.H-23887.DS17674.twopass.merge150.wgt10.zgt2.wig.gz	0.00047	1.99e-11	0.074	0.00826	0.00434	0.691	0.000536	0.000416	0.00224	0.0483	0.0784	0.000172	0.53	0.185	8.49e-05	1.4e-05	0.00234	0.0178	0.559	0.000685	0.0352	0.174	0.00762	0.256	0.13	0.765	0.202	0.00372	1	0.0611	0.195	2.93e-08	0.00747	2.46e-05	7.65e-05	0.0759	0.721	0.171	0.137	0.00407	3.17e-22	0.118	0.0953	0.013	0.444	0.126	1.02e-08	0.0499	0.416
Fetal_Lung_Left_Fetal_Lung_UW.Fetal_Lung_Left.ChromatinAccessibility.H-23914.DS17739.twopass.merge150.wgt10.zgt2.wig.gz	0.0149	1.82e-10	0.261	0.00333	0.0152	0.691	0.000171	0.00129	0.00364	0.0173	0.0388	3.06e-05	0.645	0.526	2.8e-05	2.17e-05	0.00143	0.0104	0.316	0.0144	0.0463	0.0655	0.00597	0.414	0.0985	0.852	0.245	0.00837	1	0.00527	0.213	3.74e-07	4.67e-06	2.92e-07	0.000171	0.171	0.72	0.139	0.011	0.0256	1.38e-26	0.00544	0.133	0.00169	0.368	0.057	2.45e-09	0.0451	0.536
Fetal_Lung_Left_Fetal_Lung_UW.Fetal_Lung_Left.ChromatinAccessibility.H-23964.DS17835.twopass.merge150.wgt10.zgt2.wig.gz	0.0876	2.16e-13	0.354	0.00191	0.0952	0.26	0.0123	0.00175	0.00146	0.0275	0.0835	6.88e-05	0.575	0.719	0.000824	0.00695	0.00134	0.00997	0.146	0.136	0.0208	0.161	0.0252	0.451	0.0475	0.91	0.491	0.0454	1	0.0888	0.456	5.15e-06	0.00747	0.0239	0.000277	0.0476	0.668	0.576	0.263	0.00323	6.25e-19	0.154	0.0828	0.0286	0.919	0.0359	5.9e-05	0.0117	0.552
Fetal_Lung_Left_Fetal_Lung_UW.Fetal_Lung_Left.ChromatinAccessibility.H-24005.DS17959.twopass.merge150.wgt10.zgt2.wig.gz	0.0183	6.72e-12	0.229	0.0171	0.0248	0.724	0.000398	0.00322	0.0255	0.0395	0.0454	8.86e-05	0.424	0.526	0.000906	1.08e-08	0.015	0.0304	0.205	0.0251	0.0504	0.345	0.00737	0.286	0.00342	0.802	0.559	0.00333	1	0.0698	0.541	6.56e-07	0.0371	2.46e-05	0.000112	0.207	0.728	0.335	0.117	0.00407	3.37e-26	0.175	0.0902	0.00277	0.372	0.088	1.12e-10	0.00286	0.247
Fetal_Lung_Left_Fetal_Lung_UW.Fetal_Lung_Left.ChromatinAccessibility.H-24089.DS18421.twopass.merge150.wgt10.zgt2.wig.gz	0.00023	2.24e-11	0.00473	0.00313	0.0127	0.639	6.29e-06	0.00605	0.00228	0.0231	0.188	0.000965	0.47	0.767	1.61e-05	1.52e-06	0.0192	0.0134	0.274	0.000139	0.0154	0.0655	0.072	0.286	0.00407	0.691	0.745	0.00242	1	0.104	0.278	4.93e-06	0.00171	7.89e-06	0.000196	0.0727	0.728	0.304	0.0311	0.000499	4.19e-21	0.626	0.0831	7.22e-05	0.618	0.0418	2.29e-09	0.000294	0.561
Fetal_Lung_Left_Fetal_Lung_UW.Fetal_Lung_Left.ChromatinAccessibility.H-24111.DS18487.twopass.merge150.wgt10.zgt2.wig.gz	0.00244	7.59e-09	0.0204	0.0176	0.287	0.698	0.00243	0.0641	0.0187	0.0335	0.0635	0.00617	0.619	0.693	0.000132	6.82e-07	0.0425	0.0304	0.316	0.000781	0.0508	0.511	0.188	0.197	0.156	0.657	0.85	0.000536	1	0.157	0.873	4.01e-07	0.00913	7.97e-05	7.62e-05	0.218	0.6	0.432	0.551	0.0114	1.33e-16	0.725	0.088	0.000955	0.573	0.295	3.88e-09	0.000331	0.795
Fetal_Lung_Right_Fetal_Lung_UW.Fetal_Lung_Right.ChromatinAccessibility.H-23435.DS15632.twopass.merge150.wgt10.zgt2.wig.gz	0.00128	8.87e-10	0.0156	0.0196	0.0385	0.703	0.00294	0.0068	0.00376	0.0913	0.0649	0.000882	0.619	0.517	0.00212	8.14e-06	0.0192	0.0347	0.242	0.000959	0.0595	0.122	0.0228	0.256	0.0257	0.589	0.683	4.17e-05	1	0.0365	0.489	4.74e-07	0.00342	2.58e-07	7.62e-05	0.0539	0.373	0.62	0.0833	0.00245	8.88e-24	0.0516	0.104	0.00485	0.587	0.222	1.12e-11	0.0165	0.344
Fetal_Lung_Right_Fetal_Lung_UW.Fetal_Lung_Right.ChromatinAccessibility.H-23604.DS16566.twopass.merge150.wgt10.zgt2.wig.gz	0.00156	9.25e-13	0.0894	0.034	0.0885	0.703	0.00298	0.0024	0.0235	0.0395	0.101	0.00473	0.566	0.922	0.000824	3.28e-05	0.0242	0.0578	0.124	0.00215	0.0698	0.174	0.06	0.132	0.0218	0.8	0.68	0.000387	1	0.105	0.245	4.2e-06	0.00342	8.26e-05	5.16e-06	0.177	0.542	0.263	0.815	0.0237	2.45e-20	0.164	0.091	0.00148	0.29	0.531	1.74e-08	0.0106	0.287
Fetal_Lung_Right_Fetal_Lung_UW.Fetal_Lung_Right.ChromatinAccessibility.H-23640.DS16790.twopass.merge150.wgt10.zgt2.wig.gz	0.0173	6.25e-13	0.0114	0.00313	0.0315	0.544	0.000471	0.0167	0.0111	0.107	0.121	0.001	0.416	0.0839	0.000159	1.58e-06	0.00944	0.00906	0.0438	0.0112	0.0347	0.0655	0.000476	0.466	0.0116	0.852	0.314	0.0057	1	0.0396	0.122	1.01e-05	0.000301	3.9e-07	0.000303	0.19	0.543	0.411	0.071	0.00114	7.94e-21	0.209	0.142	0.0196	0.953	0.0823	4.04e-09	0.032	0.919
Fetal_Lung_Right_Fetal_Lung_UW.Fetal_Lung_Right.ChromatinAccessibility.H-23744.DS17101.twopass.merge150.wgt10.zgt2.wig.gz	0.00234	9.15e-13	0.0142	0.00985	0.0246	0.505	9.92e-05	0.000424	0.0727	0.0174	0.145	0.00882	0.126	0.523	0.000235	7.03e-06	0.0453	0.0199	0.15	0.00376	0.0352	0.123	0.0491	0.273	0.00417	0.765	0.508	0.0012	1	0.0154	0.206	7.06e-08	0.0016	1.93e-07	0.000691	0.0329	0.728	0.399	0.083	0.0149	5.36e-25	0.681	0.0428	0.00256	0.368	0.0823	1.37e-12	0.0496	0.119
Fetal_Lung_Right_Fetal_Lung_UW.Fetal_Lung_Right.ChromatinAccessibility.H-23758.DS17162.twopass.merge150.wgt10.zgt2.wig.gz	0.00047	4.22e-14	0.00881	0.00473	0.0437	0.544	0.000312	0.00384	0.0141	0.0835	0.0758	0.000801	0.158	0.287	0.00103	1.1e-08	0.0135	0.0178	0.416	0.00073	0.0334	0.0655	0.00278	0.316	0.0162	0.657	0.0928	0.000621	1	0.0282	0.109	1.6e-07	0.0073	1.73e-05	6.25e-05	0.0642	0.728	0.316	0.107	0.00114	4.8e-24	0.401	0.0455	0.0035	0.406	0.214	1.73e-09	0.0199	0.437
Fetal_Lung_Right_Fetal_Lung_UW.Fetal_Lung_Right.ChromatinAccessibility.H-23887.DS17670.twopass.merge150.wgt10.zgt2.wig.gz	0.00429	2.33e-10	0.0203	0.00191	0.0315	0.544	0.000577	0.000709	0.0439	0.0366	0.083	0.000431	0.42	0.285	0.000869	1.25e-08	0.0148	0.0141	0.0146	0.00511	0.00996	0.0824	0.00199	0.256	0.0178	0.772	0.292	0.00249	1	0.00401	0.0968	4.96e-07	0.00052	2.48e-06	0.000196	0.114	0.728	0.282	0.0235	0.00105	1.03e-21	0.182	0.072	0.0955	0.747	0.0359	4.19e-10	0.118	0.883
Fetal_Lung_Right_Fetal_Lung_UW.Fetal_Lung_Right.ChromatinAccessibility.H-23964.DS17831.twopass.merge150.wgt10.zgt2.wig.gz	0.00431	3.71e-12	0.00263	0.000163	0.0184	0.385	0.000405	2.6e-05	0.00768	0.0282	0.0909	6.9e-05	0.513	0.292	0.000385	3.53e-06	0.012	0.000353	0.369	0.00376	0.0019	0.335	0.0587	0.281	0.0033	0.623	0.297	0.00234	1	0.0329	0.197	6.13e-09	0.00342	3.76e-05	0.00477	0.167	0.23	0.604	0.0675	0.00407	5.28e-23	0.309	0.084	0.00154	0.88	0.117	3.56e-10	0.00144	0.349
Fetal_Lung_Right_Fetal_Lung_UW.Fetal_Lung_Right.ChromatinAccessibility.H-24005.DS17954.twopass.merge150.wgt10.zgt2.wig.gz	0.00431	3.06e-11	0.0128	0.00547	0.0391	0.544	0.00012	2.4e-05	0.0183	0.106	0.124	0.000201	0.429	0.222	0.000681	2e-06	0.0109	0.0343	0.124	0.00676	0.0361	0.0304	0.0535	0.28	0.0033	0.765	0.227	0.00389	1	0.171	0.21	8.73e-07	0.0025	4.59e-08	0.000303	0.111	0.543	0.248	0.0835	0.000473	2.7e-28	0.336	0.0828	0.000821	0.699	0.0418	1.61e-09	0.000294	0.246
Fetal_Lung_Right_Fetal_Lung_UW.Fetal_Lung_Right.ChromatinAccessibility.H-24089.DS18418.twopass.merge150.wgt10.zgt2.wig.gz	0.000307	5.01e-12	0.0114	0.00264	0.0471	0.148	0.00188	0.000351	0.00199	0.129	0.239	0.000602	0.552	0.282	0.00141	0.00103	0.000927	0.011	0.205	0.000253	0.0184	0.2	0.00942	0.223	0.113	0.136	0.857	0.00296	1	0.0538	0.48	2.39e-06	0.000437	0.000311	7.62e-05	0.21	0.574	0.411	0.398	0.00837	1.24e-15	0.424	0.362	0.00154	0.665	0.575	6e-08	0.0105	0.396
Fetal_Lung_Right_Fetal_Lung_UW.Fetal_Lung_Right.ChromatinAccessibility.H-24111.DS18492.twopass.merge150.wgt10.zgt2.wig.gz	0.00908	8.34e-11	0.0586	0.0243	0.134	0.284	0.000773	0.0236	0.0367	0.072	0.177	0.01	0.391	0.679	0.0006	4.23e-06	0.0539	0.0393	0.495	0.003	0.072	0.512	0.123	0.396	0.0333	0.903	0.744	0.000431	1	0.278	0.602	1e-05	0.000437	0.00031	9.14e-05	0.132	0.614	0.565	0.513	0.0938	9.05e-17	0.362	0.151	0.000339	0.848	0.281	4.27e-07	0.00201	0.553
Fetal_Lung_Fetal_Lung_UW.Fetal_Lung.ChromatinAccessibility.H-22676.DS12646.twopass.merge150.wgt10.zgt2.wig.gz	0.000727	3.84e-12	1	0.000945	0.00979	0.49	0.000586	0.000571	3.44e-05	0.0382	0.0875	1.35e-05	0.12	0.501	0.000579	1.92e-07	8.45e-05	0.0113	0.264	0.000781	0.0129	0.392	0.0188	0.273	0.0362	0.339	0.41	0.000387	1	0.00401	0.213	6.81e-10	0.0121	1.45e-05	6.25e-05	0.118	0.713	0.263	0.412	0.0114	3.2e-25	0.00793	0.111	0.049	0.573	0.0359	2.15e-10	0.0877	0.814
Fetal_Lung_Fetal_Lung_UW.Fetal_Lung.ChromatinAccessibility.H-22727.DS12817.twopass.merge150.wgt10.zgt2.wig.gz	0.0481	1.47e-11	0.00537	0.00586	0.00297	0.639	0.000471	0.00013	0.0101	0.00647	0.041	0.000489	0.195	0.984	0.000102	2.09e-08	0.0055	0.0219	0.205	0.052	0.0411	0.0853	0.00942	0.223	0.0328	0.504	0.297	0.0109	1	0.00399	0.122	4.05e-05	0.000437	1.02e-07	0.000113	0.149	0.542	0.177	0.247	0.017	4.67e-22	0.483	0.177	0.0423	0.587	0.0759	3.71e-08	0.000402	0.685
Fetal_Lung_Fetal_Lung_UW.Fetal_Lung.ChromatinAccessibility.H-22934B.DS13507.twopass.merge150.wgt10.zgt2.wig.gz	0.00289	6.15e-13	0.0032	0.00333	0.0183	0.599	0.000536	0.00029	0.0203	0.0445	0.103	0.000775	0.395	0.523	6.02e-06	3.72e-07	0.0192	0.0141	0.0472	0.00193	0.0259	0.0655	0.00133	0.273	0.00226	0.367	0.487	0.00233	1	0.00133	0.627	3.6e-09	0.000437	3.31e-06	0.000171	0.142	0.728	0.444	0.438	0.00803	3.82e-22	0.0965	0.091	8.98e-05	0.677	0.222	1.75e-09	0.000911	0.665
Fetal_Lung_Fetal_Lung_UW.Fetal_Lung.ChromatinAccessibility.H-23090.DS13985.twopass.merge150.wgt10.zgt2.wig.gz	0.0151	1.26e-09	0.139	0.013	0.0144	0.562	0.0025	0.0156	0.0122	0.103	0.226	0.000554	0.732	0.767	3.35e-05	0.000547	0.0101	0.0257	0.369	0.00887	0.0448	0.425	0.00156	0.28	0.192	0.349	0.909	0.0037	1	0.0148	0.607	1.82e-05	0.00258	3.12e-06	7.62e-05	0.132	0.543	0.641	0.565	0.0233	1.31e-16	0.696	0.0946	0.00154	0.92	0.0764	1.25e-07	0.000817	0.644
Fetal_Lung_Fetal_Lung_UW.Fetal_Lung.ChromatinAccessibility.H-23247.DS14666.twopass.merge150.wgt10.zgt2.wig.gz	0.00156	1.26e-10	0.125	0.0412	0.0628	0.648	0.000398	0.0423	0.0181	0.0587	0.234	0.00374	0.357	0.616	0.000487	2.32e-05	0.0101	0.0684	0.495	0.00202	0.173	0.218	0.288	0.396	0.14	0.504	0.693	0.00256	1	0.0504	0.181	0.000484	0.00337	0.00016	0.00168	0.297	0.728	0.411	0.133	0.0377	2.07e-21	0.13	0.0846	0.0037	0.454	0.0612	1.36e-07	0.0493	0.437
Fetal_Lung_Fetal_Lung_UW.Fetal_Lung.ChromatinAccessibility.H-23266.DS14724.twopass.merge150.wgt10.zgt2.wig.gz	0.00102	3.71e-12	0.00385	0.00239	0.0109	0.656	0.00393	7.28e-05	0.00336	0.024	0.0675	9.6e-05	0.592	0.611	0.000447	2.92e-07	0.00281	0.0117	0.126	0.00143	0.0219	0.0744	0.0257	0.286	0.0269	0.825	0.136	0.000227	1	0.0536	0.151	2.99e-07	0.00258	6.98e-06	4.06e-05	0.117	0.728	0.263	0.101	0.000499	1.7e-25	0.329	0.0667	0.128	0.753	0.151	5.11e-12	0.0125	0.679
Fetal_Lung_Fetal_Lung_UW.Fetal_Lung.ChromatinAccessibility.H-23266.DS14751.twopass.merge150.wgt10.zgt2.wig.gz	0.0203	1.29e-09	0.0698	0.0106	0.0484	0.752	0.0262	0.176	0.0137	0.0395	0.107	0.00153	0.611	0.727	0.0021	6.92e-05	0.00706	0.032	0.193	0.0106	0.0595	0.335	0.02	0.286	0.0414	0.795	0.557	0.00213	1	0.243	0.536	4.15e-05	0.00477	0.000103	0.000185	0.239	0.728	0.329	0.975	0.0373	1.73e-16	0.539	0.0961	0.0217	0.572	0.8	1.84e-06	0.0011	0.66
Fetal_Lung_Fetal_Lung_UW.Fetal_Lung.ChromatinAccessibility.H-23284.DS14809.twopass.merge150.wgt10.zgt2.wig.gz	0.00356	2.33e-10	0.354	0.0143	0.0301	0.588	0.000418	0.00145	0.00781	0.0395	0.0595	0.00217	0.513	0.517	8.18e-05	8.14e-06	0.00772	0.028	0.495	0.0036	0.0497	0.174	0.0574	0.412	0.0514	0.439	0.189	0.000835	1	0.0206	0.099	4.48e-08	0.0225	2.63e-06	0.000148	0.0879	1	0.444	0.127	0.0114	4.33e-21	0.238	0.0514	0.0255	0.368	0.325	4.14e-09	0.0105	0.475
Fetal_Lung_Fetal_Lung_UW.Fetal_Lung.ChromatinAccessibility.H-23284.DS14820.twopass.merge150.wgt10.zgt2.wig.gz	0.00375	1.32e-10	0.0318	0.000924	0.1	0.648	0.000405	0.00185	0.00579	0.0623	0.0634	0.00023	0.622	0.984	5.49e-05	1.48e-05	0.00496	0.00951	0.26	0.00929	0.0167	0.105	0.0266	0.0922	0.0989	0.852	0.508	0.0137	1	0.21	0.22	3.03e-07	0.00192	0.000267	8.6e-05	0.171	0.728	0.394	0.285	0.00252	1.48e-18	0.178	0.0606	0.0035	0.54	0.8	2.41e-09	0.000294	0.426
Fetal_Lung_Fetal_Lung_UW.Fetal_Lung.ChromatinAccessibility.H-23365.DS15227.twopass.merge150.wgt10.zgt2.wig.gz	0.0121	1.47e-08	0.175	0.0101	0.0893	0.26	0.000713	0.0211	0.111	0.0107	0.0286	0.00724	0.312	0.468	0.000132	4.23e-06	0.0262	0.0309	0.316	0.0124	0.0571	0.116	0.0861	0.256	0.0167	0.772	0.577	0.00789	1	0.168	0.406	2.26e-05	0.00342	3.15e-05	4.06e-05	0.128	0.728	0.42	0.381	0.0777	1.88e-21	0.252	0.00656	0.0058	0.791	0.19	3.38e-11	0.00351	0.383
Fetal_Lung_Fetal_Lung_UW.Fetal_Lung.ChromatinAccessibility.H-23399.DS15461.twopass.merge150.wgt10.zgt2.wig.gz	0.0145	5.5e-10	0.0874	0.0504	0.0543	0.966	0.00151	0.0195	0.0231	0.0395	0.137	0.00796	0.566	0.767	1.06e-05	2.81e-05	0.015	0.0539	0.576	0.00393	0.0924	0.174	0.0552	0.273	0.00927	0.606	0.685	0.00174	1	0.0393	0.181	2.83e-06	0.00477	1.5e-05	3.71e-05	0.232	0.728	0.233	0.835	0.0155	4.82e-18	0.336	0.00618	0.013	0.563	0.222	4.34e-10	0.00467	0.559
Fetal_Lung_Fetal_Lung_UW.Fetal_Lung.ChromatinAccessibility.H-23419.DS15573.twopass.merge150.wgt10.zgt2.wig.gz	0.00527	2.11e-08	0.024	0.00826	0.0799	0.691	0.00115	0.0048	0.0326	0.0395	0.0882	0.00548	0.787	0.763	3.49e-05	1.43e-05	0.047	0.0199	0.427	0.00674	0.0347	0.389	0.0662	0.286	0.0539	0.641	0.876	0.00242	0.662	0.193	0.348	4.28e-06	0.000765	6.79e-06	7.62e-05	0.127	0.373	0.337	0.586	0.0223	1.85e-20	0.517	0.16	0.00517	0.603	0.211	2.42e-07	0.0401	0.552
Fetal_Muscle_Arm_Fetal_Muscle_UW.Fetal_Muscle_Arm.ChromatinAccessibility.H-23808.DS17432.twopass.merge150.wgt10.zgt2.wig.gz	0.0299	2.73e-11	0.00389	0.00929	0.0192	0.544	0.0175	0.00723	0.00586	0.0395	0.283	3.7e-05	0.645	0.52	0.0022	1.4e-05	0.00625	0.0309	0.0283	0.0184	0.0347	0.157	0.0374	0.36	0.052	0.639	0.825	0.00919	1	0.0834	0.173	1e-06	0.0976	4.72e-06	0.000682	0.445	0.728	0.655	0.47	0.0214	6.22e-18	0.143	0.151	0.0286	0.697	0.8	3.49e-11	0.118	0.964
Fetal_Muscle_Arm_Fetal_Muscle_UW.Fetal_Muscle_Arm.ChromatinAccessibility.H-23914.DS17765.twopass.merge150.wgt10.zgt2.wig.gz	0.00624	2.65e-08	0.00302	0.0268	0.0076	0.505	0.00262	0.00187	0.0365	0.0482	0.115	0.000249	0.245	0.274	5.19e-05	9.78e-09	0.0771	0.105	0.205	0.0121	0.196	0.667	0.0111	0.473	0.00226	0.313	0.28	9.88e-05	0.539	0.119	0.0163	9.05e-08	0.0194	1.64e-06	0.00181	0.254	0.324	0.854	0.0101	0.00553	2.94e-27	0.0357	0.299	0.0282	0.586	0.334	1.69e-07	0.164	0.949
Fetal_Muscle_Arm_Fetal_Muscle_UW.Fetal_Muscle_Arm.ChromatinAccessibility.H-23941.DS17825.twopass.merge150.wgt10.zgt2.wig.gz	0.073	2.12e-10	0.00311	0.0369	0.0362	0.639	0.000207	0.000692	0.0529	0.101	0.0744	0.000324	0.148	0.523	4.74e-06	1.52e-06	0.0199	0.106	0.171	0.0562	0.162	0.174	0.02	0.273	0.0167	0.609	0.245	0.00468	1	0.0504	0.142	6.13e-09	0.0118	5.81e-07	0.000987	0.171	0.543	0.655	0.0024	0.01	5.04e-29	0.094	0.0902	0.0286	0.499	0.812	4.2e-10	0.0499	0.426
Fetal_Muscle_Arm_Fetal_Muscle_UW.Fetal_Muscle_Arm.ChromatinAccessibility.H-23964.DS17848.twopass.merge150.wgt10.zgt2.wig.gz	0.0197	2.76e-09	0.00263	0.00174	0.0471	0.648	0.000787	7.24e-05	0.0145	0.0842	0.118	0.000776	0.306	0.883	0.00014	3.14e-05	0.0381	0.00951	0.158	0.0253	0.0361	0.494	0.141	0.329	0.0368	0.574	0.241	0.0836	1	0.0456	0.0279	1.75e-09	0.0197	4.19e-05	0.000407	0.118	0.542	0.644	0.0951	0.0103	4.97e-27	0.178	0.136	0.0451	0.416	0.8	1.79e-11	0.0692	0.634
Fetal_Muscle_Arm_Fetal_Muscle_UW.Fetal_Muscle_Arm.ChromatinAccessibility.H-24005.DS18080.twopass.merge150.wgt10.zgt2.wig.gz	0.000307	9.98e-12	0.00444	0.00241	0.0197	0.428	0.00069	4.49e-05	0.00756	0.0395	0.0863	0.000282	0.143	0.532	3.26e-05	7.26e-07	0.0122	0.0119	0.0872	0.00031	0.0271	0.174	0.000456	0.286	0.0167	0.261	0.76	0.000152	1	0.0219	0.111	6.13e-10	0.0458	5.05e-07	0.000506	0.302	0.668	0.732	0.0827	0.0114	1.76e-26	0.107	0.0514	0.0082	0.604	0.691	1.3e-12	0.129	0.817
Fetal_Muscle_Arm_Fetal_Muscle_UW.Fetal_Muscle_Arm.ChromatinAccessibility.H-24042.DS18176.twopass.merge150.wgt10.zgt2.wig.gz	0.0696	5.08e-11	0.00841	0.000435	0.0877	0.656	0.000824	0.000374	0.0175	0.083	0.0863	7.63e-05	0.245	0.501	3.35e-05	8.65e-06	0.046	0.00246	0.0357	0.0435	0.00478	0.58	0.0124	0.404	0.00407	0.504	0.738	0.0608	1	0.0342	0.233	5.39e-09	0.0492	7.9e-07	0.00409	0.19	0.542	0.805	0.0935	0.0211	1.29e-27	0.044	0.221	0.0216	0.695	0.8	2e-10	0.239	0.634
Fetal_Muscle_Arm_Fetal_Muscle_UW.Fetal_Muscle_Arm.ChromatinAccessibility.H-24078.DS18379.twopass.merge150.wgt10.zgt2.wig.gz	0.00214	3.85e-07	0.00302	0.0508	0.198	0.562	0.0169	0.003	0.00384	0.0275	0.118	0.00169	0.283	0.859	0.00722	4.18e-05	0.0218	0.129	0.231	0.00323	0.185	0.56	0.0228	0.339	0.0861	0.609	0.856	0.00273	1	0.0391	0.315	0.000186	0.0345	1.2e-05	0.000813	0.264	0.728	0.826	0.163	0.0235	2.14e-26	0.175	0.0957	0.0571	0.529	0.428	5.49e-14	0.123	0.437
Fetal_Muscle_Arm_Fetal_Muscle_UW.Fetal_Muscle_Arm.ChromatinAccessibility.H-24089.DS18452.twopass.merge150.wgt10.zgt2.wig.gz	0.00238	6.73e-09	0.00263	0.0312	0.169	0.691	0.000803	0.0223	0.0605	0.122	0.0744	0.00222	0.172	0.934	0.000613	3.67e-06	0.0854	0.0604	0.0858	0.00361	0.184	0.346	0.0345	0.286	0.0724	0.662	0.521	0.0067	1	0.00897	0.267	2.37e-06	0.0708	1.45e-05	0.00495	0.322	0.419	0.768	0.0539	0.0269	9.25e-23	0.159	0.163	0.0109	0.747	0.812	1.26e-12	0.164	0.456
Fetal_Muscle_Arm_Fetal_Muscle_UW.Fetal_Muscle_Arm.ChromatinAccessibility.H-24111.DS18473.twopass.merge150.wgt10.zgt2.wig.gz	0.00151	6.14e-11	0.00445	0.0158	0.0301	0.626	0.00175	0.0444	0.0116	0.107	0.0955	0.00025	0.357	0.222	0.000234	7.26e-07	0.0743	0.0199	0.19	0.00265	0.0476	0.682	0.0768	0.409	0.0761	0.963	0.744	0.00789	1	0.0245	0.458	1.73e-07	0.138	9.13e-07	0.000211	0.254	0.552	0.809	0.231	0.0116	8.51e-23	0.0727	0.106	0.00186	0.514	0.812	1.09e-13	0.101	0.456
Fetal_Muscle_Arm_Fetal_Muscle_UW.Fetal_Muscle_Arm.ChromatinAccessibility.H-24125.DS18559.twopass.merge150.wgt10.zgt2.wig.gz	0.0245	1.21e-06	0.0031	0.151	0.0214	0.691	0.0023	0.00542	0.0315	0.0851	0.0772	0.000694	0.718	0.885	0.000145	6.64e-07	0.0207	0.205	0.208	0.0311	0.285	0.632	0.121	0.327	0.172	0.489	0.883	0.0175	1	0.242	0.131	1.48e-07	0.199	3e-05	0.00029	0.213	0.542	0.411	0.236	0.0321	1.85e-25	0.0545	0.091	0.00158	0.563	0.8	1.29e-12	0.0966	0.636
Fetal_Muscle_Arm_Fetal_Muscle_UW.Fetal_Muscle_Arm.ChromatinAccessibility.H-24143.DS18992.twopass.merge150.wgt10.zgt2.wig.gz	0.000307	3.72e-08	0.00793	0.0367	0.288	0.835	0.00137	0.00416	0.0283	0.0766	0.0863	0.000431	0.395	0.465	0.00238	7.3e-05	0.0495	0.101	0.153	0.000204	0.101	0.58	0.141	0.33	0.14	0.504	0.857	4.17e-05	1	0.0709	0.0851	1.18e-10	0.179	2.12e-06	0.000673	0.481	0.728	0.694	0.169	0.0465	3.2e-25	0.115	0.104	0.0113	0.257	0.8	1.85e-09	0.389	0.442
Fetal_Muscle_Arm_Fetal_Muscle_UW.Fetal_Muscle_Arm.ChromatinAccessibility.H-24198.DS19051.twopass.merge150.wgt10.zgt2.wig.gz	0.000722	5.17e-07	0.00306	0.272	0.0825	0.505	0.0023	0.0921	0.0901	0.0768	0.0662	0.0118	0.134	0.984	0.000138	6.96e-06	0.0635	0.241	0.11	0.00123	0.559	0.631	0.0446	0.434	0.322	0.609	0.76	0.000378	1	0.213	0.165	0.00237	0.0855	6.48e-05	0.000334	0.175	0.542	0.258	0.109	0.0207	2.22e-21	0.132	0.16	0.000339	0.315	0.8	3.72e-14	0.0327	0.426
Fetal_Muscle_Arm_Fetal_Muscle_UW.Fetal_Muscle_Arm.ChromatinAccessibility.H-24218.DS19053.twopass.merge150.wgt10.zgt2.wig.gz	0.00334	2.49e-08	0.00273	0.0366	0.18	0.675	0.00427	0.0398	0.0235	0.0426	0.124	3.54e-05	0.811	0.767	0.00312	1.58e-06	0.0594	0.101	0.108	0.0049	0.191	0.67	0.141	0.173	0.0841	0.843	0.835	0.0146	1	0.133	0.173	5.35e-07	0.0054	1.1e-05	9.52e-05	0.489	0.543	0.798	0.0627	0.161	4.78e-24	0.0878	0.142	0.00873	0.254	1	3.86e-10	0.244	0.383
Fetal_Muscle_Arm_Fetal_Muscle_UW.Fetal_Muscle_Arm.ChromatinAccessibility.H-24244.DS19270.twopass.merge150.wgt10.zgt2.wig.gz	0.0453	1.15e-10	0.00302	0.0144	0.0493	0.718	0.000398	0.00113	0.0141	0.0395	0.225	0.000126	0.177	0.523	7.18e-05	1.13e-05	0.0138	0.0309	0.196	0.0511	0.072	0.0655	0.0124	0.286	0.00456	0.118	0.564	0.054	1	0.105	0.165	1.19e-08	0.0246	9.63e-07	0.00148	0.157	0.542	0.411	0.107	0.0461	4.97e-25	0.287	0.236	0.000696	0.546	1	3.38e-11	0.279	0.344
Fetal_Muscle_Arm_Fetal_Muscle_UW.Fetal_Muscle_Arm.ChromatinAccessibility.H-24259.DS19295.twopass.merge150.wgt10.zgt2.wig.gz	0.0182	7.56e-09	0.0114	0.0305	0.0129	0.268	0.046	0.000418	0.0073	0.0395	0.137	9.23e-05	0.384	0.984	0.000102	7.34e-05	0.0181	0.0369	0.174	0.013	0.139	0.631	0.117	0.547	0.0492	0.65	0.9	0.0116	1	0.0181	0.219	2.76e-09	0.0537	2.84e-06	0.000536	0.302	0.542	0.751	0.254	0.0414	5.17e-25	0.102	0.159	0.00237	0.29	0.8	1.3e-12	0.0877	0.492
Fetal_Muscle_Arm_Fetal_Muscle_UW.Fetal_Muscle_Arm.ChromatinAccessibility.H-24272.DS19380.twopass.merge150.wgt10.zgt2.wig.gz	5.19e-05	3.9e-08	0.00302	0.0305	0.0301	0.599	0.00375	0.0504	0.0558	0.104	0.361	0.00187	0.513	0.913	4.52e-06	9.97e-06	0.0536	0.0638	0.417	7.54e-05	0.0634	0.631	0.00737	0.224	0.0322	0.671	0.466	0.000427	1	0.0332	0.125	1.25e-05	0.0165	2.78e-05	0.00125	0.254	0.373	0.694	0.127	0.00407	2.08e-26	0.171	0.198	0.00322	0.533	0.806	7.52e-16	0.125	0.847
Fetal_Muscle_Arm_Fetal_Muscle_UW.Fetal_Muscle_Arm.ChromatinAccessibility.H-24297.DS19646.twopass.merge150.wgt10.zgt2.wig.gz	0.0192	2.63e-07	0.00302	0.0291	0.0331	0.505	0.00981	0.0108	0.0642	0.0799	0.137	0.00177	0.345	0.984	0.0073	0.00115	0.148	0.0522	0.581	0.0226	0.0831	0.613	0.137	0.286	0.0482	0.817	0.573	0.0196	1	0.142	0.17	4.6e-05	0.0418	0.00133	0.00387	0.171	0.542	0.608	0.218	0.0217	2.99e-25	0.13	0.249	0.00223	0.368	1	6.97e-11	0.233	0.349
Fetal_Muscle_Back_Fetal_Muscle_UW.Fetal_Muscle_Back.ChromatinAccessibility.H-23914.DS17767.twopass.merge150.wgt10.zgt2.wig.gz	0.0101	1.52e-10	0.00488	0.00794	0.0487	0.605	0.00115	0.000628	0.0298	0.0997	0.0662	0.000336	0.238	0.403	0.000122	1.7e-06	0.0439	0.0638	0.369	0.0171	0.0875	0.718	0.00674	0.404	0.0638	0.765	0.491	0.0113	1	0.00637	0.171	6.6e-09	0.0153	1.34e-06	0.00506	0.302	0.322	0.604	0.0885	0.000499	4.55e-29	0.0996	0.181	0.00384	0.313	0.902	1.3e-12	0.196	0.649
Fetal_Muscle_Back_Fetal_Muscle_UW.Fetal_Muscle_Back.ChromatinAccessibility.H-23964.DS17850.twopass.merge150.wgt10.zgt2.wig.gz	0.0357	7.37e-10	0.00302	0.00386	0.0129	0.775	0.000104	0.002	0.0278	0.0791	0.332	0.000103	0.381	0.456	7.05e-05	2.08e-06	0.0158	0.0171	0.387	0.0425	0.0448	0.494	0.02	0.316	0.00342	0.489	0.334	0.0245	1	0.0372	0.0385	1.26e-08	0.0197	2.48e-06	0.000829	0.239	0.728	0.338	0.0302	0.0718	4.57e-25	0.164	0.251	0.0143	0.563	0.8	4.64e-13	0.0926	0.349
Fetal_Muscle_Back_Fetal_Muscle_UW.Fetal_Muscle_Back.ChromatinAccessibility.H-24005.DS18083.twopass.merge150.wgt10.zgt2.wig.gz	0.00386	3.15e-11	0.0148	0.00203	0.00621	0.401	0.000471	0.000204	0.00109	0.0917	0.0812	0.000109	0.186	0.39	2.28e-05	2.43e-06	0.00936	0.024	0.0417	0.00196	0.0373	0.358	0.000786	0.396	0.00226	0.32	0.557	0.000296	1	0.00194	0.0892	7.36e-12	0.124	6.6e-07	0.000397	0.447	0.499	0.624	0.0631	0.00527	4.05e-29	0.0516	0.16	0.00695	0.224	0.664	1.75e-13	0.0788	0.636
Fetal_Muscle_Back_Fetal_Muscle_UW.Fetal_Muscle_Back.ChromatinAccessibility.H-24078.DS18377.twopass.merge150.wgt10.zgt2.wig.gz	0.00732	1.7e-09	0.00302	0.374	0.0952	0.887	0.0155	0.00726	0.0752	0.0395	0.121	7.79e-05	0.357	0.704	0.000231	3.31e-05	0.0668	0.325	0.175	0.00928	0.421	0.122	0.0301	0.403	0.0216	0.866	0.876	0.00795	1	0.128	0.615	1.53e-07	0.00988	9.63e-07	0.000371	0.59	0.728	0.763	0.117	0.0506	4.97e-27	0.02	0.0507	0.00382	0.724	0.8	1.09e-13	0.0499	0.564
Fetal_Muscle_Back_Fetal_Muscle_UW.Fetal_Muscle_Back.ChromatinAccessibility.H-24089.DS18454.twopass.merge150.wgt10.zgt2.wig.gz	0.00102	7.26e-10	0.00881	0.0122	0.0312	0.703	0.0371	0.0194	0.0845	0.0914	0.102	0.0061	0.481	0.984	0.00165	3.14e-05	0.0547	0.0378	0.195	0.000751	0.103	0.114	0.028	0.422	0.0178	0.852	0.759	0.00418	1	0.00978	0.115	2.26e-05	0.00639	0.0025	0.000234	0.226	0.542	0.432	0.204	0.017	2.08e-23	0.329	0.16	0.00548	0.306	1	1.09e-13	0.0417	0.652
Fetal_Muscle_Back_Fetal_Muscle_UW.Fetal_Muscle_Back.ChromatinAccessibility.H-24111.DS18468.twopass.merge150.wgt10.zgt2.wig.gz	0.000484	2.36e-09	0.0059	0.112	0.131	0.691	0.000586	0.00158	0.0851	0.118	0.0293	0.0025	0.311	0.802	0.000175	2.07e-07	0.177	0.17	0.153	0.000388	0.237	0.742	0.0229	0.291	0.371	0.609	0.777	0.000632	1	0.245	0.244	4.13e-07	0.0368	5.7e-07	0.000444	0.278	0.568	0.809	0.433	0.0257	2.52e-26	0.309	0.239	0.0256	0.753	0.814	8.57e-17	0.317	0.845
Fetal_Muscle_Back_Fetal_Muscle_UW.Fetal_Muscle_Back.ChromatinAccessibility.H-24143.DS18842.twopass.merge150.wgt10.zgt2.wig.gz	0.00176	6.61e-10	0.00311	0.0298	0.44	0.544	0.0333	0.00588	0.0208	0.0411	0.216	0.0061	0.627	0.889	0.00158	0.000366	0.132	0.0908	0.178	0.00257	0.191	0.32	0.0859	0.267	0.0414	0.489	0.799	0.00171	1	0.15	0.146	6.65e-07	0.0875	1.45e-05	0.000196	0.187	0.728	0.411	0.856	0.0248	4.65e-25	0.139	0.236	0.00609	0.425	1	8.23e-10	0.0418	0.822
Fetal_Muscle_Back_Fetal_Muscle_UW.Fetal_Muscle_Back.ChromatinAccessibility.H-24218.DS19117.twopass.merge150.wgt10.zgt2.wig.gz	0.00277	3.84e-08	0.0114	0.143	0.108	0.691	0.000483	0.0107	0.000373	0.0802	0.253	0.000393	0.352	0.883	4.52e-06	2.61e-05	0.0192	0.147	0.0861	0.000798	0.216	0.0655	0.0581	0.396	0.0688	0.489	0.884	0.00074	1	0.024	0.281	4.23e-05	0.0202	0.00013	0.000392	0.254	0.728	0.43	0.401	0.0132	7.38e-24	0.114	0.184	0.00873	0.529	0.8	1.81e-12	0.0639	0.574
Fetal_Muscle_Back_Fetal_Muscle_UW.Fetal_Muscle_Back.ChromatinAccessibility.H-24244.DS19283.twopass.merge150.wgt10.zgt2.wig.gz	0.00431	2.69e-07	0.00311	0.0767	0.0964	0.752	0.00205	0.0134	0.00282	0.0335	0.067	6.45e-05	0.587	0.885	2.34e-05	1.2e-05	0.0456	0.0874	0.482	0.00148	0.139	0.631	0.0281	0.382	0.103	0.772	0.794	0.000835	1	0.226	0.123	6.58e-07	0.104	5.47e-06	0.00018	0.455	0.542	0.571	0.24	0.00499	1.07e-25	0.238	0.0889	0.0423	0.425	0.8	3.33e-11	0.0386	0.324
Fetal_Muscle_Back_Fetal_Muscle_UW.Fetal_Muscle_Back.ChromatinAccessibility.H-24272.DS19384.twopass.merge150.wgt10.zgt2.wig.gz	0.00214	1.2e-06	0.00263	0.0811	0.0488	0.675	0.00188	0.00232	0.0543	0.108	0.121	0.00587	0.514	0.922	0.000689	0.000137	0.0854	0.141	0.331	0.0036	0.195	0.631	0.021	0.321	0.0761	0.615	0.0928	0.00754	1	0.0517	0.18	4.78e-06	0.104	9.41e-06	3.71e-05	0.302	0.543	0.529	0.0126	0.0345	1.04e-28	0.114	0.276	0.00154	0.0967	0.806	4.63e-12	0.0419	0.696
Fetal_Muscle_Back_Fetal_Muscle_UW.Fetal_Muscle_Back.ChromatinAccessibility.H-24279.DS19441.twopass.merge150.wgt10.zgt2.wig.gz	0.00863	6.73e-09	0.0114	0.0299	0.0115	0.648	0.000651	0.0429	0.106	0.0914	0.2	0.000599	0.482	0.889	0.000259	2.32e-06	0.0725	0.0831	0.26	0.00295	0.179	0.122	0.00424	0.347	0.0414	0.825	0.458	0.0108	0.67	0.0828	0.115	7.49e-05	0.00462	6.79e-07	8.86e-05	0.164	0.373	0.432	0.381	0.0306	3.49e-27	0.214	0.307	0.00454	0.228	0.8	1.81e-12	0.17	0.465
Fetal_Muscle_Back_Fetal_Muscle_UW.Fetal_Muscle_Back.ChromatinAccessibility.H-24297.DS19648.twopass.merge150.wgt10.zgt2.wig.gz	0.000613	1.06e-09	0.0148	0.0298	0.0531	0.544	0.0123	0.000118	0.0598	0.118	0.111	0.00774	0.352	0.578	1.64e-05	1.86e-05	0.138	0.0897	0.582	0.000245	0.184	0.0655	0.0394	0.365	0.0989	0.504	0.532	0.000387	1	0.178	0.0713	0.000249	0.0134	1.23e-06	0.000454	0.532	0.561	0.732	0.191	0.0265	2.63e-23	0.309	0.223	0.0269	0.273	0.812	6.4e-12	0.164	0.442
Fetal_Muscle_Back_Fetal_Muscle_UW.Fetal_Muscle_Back.ChromatinAccessibility.H-24409.DS20244.twopass.merge150.wgt10.zgt2.wig.gz	0.018	2.68e-10	0.00263	0.0288	0.0186	0.656	0.000483	0.0236	0.0233	0.0881	0.119	0.000789	0.314	0.883	2.68e-05	2.45e-06	0.0665	0.0556	0.549	0.0114	0.181	0.0882	0.000332	0.487	0.0108	0.574	0.308	0.0123	1	0.00311	0.0388	1.88e-05	0.000437	4.7e-06	0.000395	0.387	0.542	0.269	0.0296	0.0731	5.28e-23	0.108	0.181	0.00748	0.112	0.48	7.99e-12	0.15	0.199
Fetal_Muscle_Leg_Fetal_Muscle_UW.Fetal_Muscle_Leg.ChromatinAccessibility.H-23808.DS17429.twopass.merge150.wgt10.zgt2.wig.gz	0.0232	7.8e-07	0.0204	0.0223	0.231	0.691	0.091	0.0214	0.015	0.219	0.279	9.6e-05	0.521	0.984	0.0112	0.00211	0.0271	0.062	0.153	0.0142	0.103	0.388	0.0924	0.544	0.122	0.504	0.937	0.021	1	0.25	0.316	4.02e-08	0.0917	0.0119	0.000547	0.214	0.728	0.816	0.383	0.0856	2.85e-16	0.53	0.104	0.0126	0.747	0.8	1.41e-08	0.0499	0.957
Fetal_Muscle_Leg_Fetal_Muscle_UW.Fetal_Muscle_Leg.ChromatinAccessibility.H-24078.DS18386.twopass.merge150.wgt10.zgt2.wig.gz	0.00277	1.69e-11	0.00302	0.0848	0.000524	0.636	0.00558	0.0111	0.00689	0.066	0.0863	0.000251	0.126	0.633	1.64e-05	8.47e-09	0.0118	0.13	0.369	0.00393	0.189	0.457	0.0163	0.36	0.00407	0.169	0.167	0.00518	1	0.0337	0.0892	3.43e-10	0.0371	6.97e-06	0.00788	0.103	0.331	0.411	0.00808	0.0214	1.8e-30	0.088	0.151	0.00386	0.467	0.8	3.72e-14	0.0327	0.437
Fetal_Muscle_Leg_Fetal_Muscle_UW.Fetal_Muscle_Leg.ChromatinAccessibility.H-24089.DS18456.twopass.merge150.wgt10.zgt2.wig.gz	0.0292	3.54e-08	0.0607	0.00887	0.0633	0.514	0.00069	0.0451	0.0255	0.0475	0.0634	9.74e-05	0.678	0.928	0.000177	1.16e-06	0.0654	0.0301	0.174	0.0412	0.0707	0.672	0.0365	0.327	0.137	0.691	0.829	0.00182	1	0.0246	0.398	4.28e-06	0.0317	0.000148	0.000612	0.297	0.398	0.657	0.113	0.0132	5.45e-28	0.257	0.145	0.00154	0.353	0.812	5.49e-14	0.138	0.552
Fetal_Muscle_Leg_Fetal_Muscle_UW.Fetal_Muscle_Leg.ChromatinAccessibility.H-24111.DS18471.twopass.merge150.wgt10.zgt2.wig.gz	0.028	1.06e-11	0.00811	0.0442	0.206	0.698	0.00593	0.00588	0.0562	0.0645	0.133	0.00893	0.352	0.96	0.000148	7.35e-06	0.09	0.165	0.178	0.0379	0.291	0.423	0.34	0.387	0.193	0.504	0.903	0.0149	1	0.217	0.216	3.96e-08	0.0888	0.00016	0.000519	0.543	0.76	0.641	0.128	0.00553	5.46e-24	0.514	0.104	0.00804	0.706	0.847	1.3e-12	0.299	0.801
Fetal_Muscle_Leg_Fetal_Muscle_UW.Fetal_Muscle_Leg.ChromatinAccessibility.H-24143.DS18844.twopass.merge150.wgt10.zgt2.wig.gz	0.0201	6.78e-11	0.00263	0.00402	0.0924	0.675	0.0109	0.187	0.00241	0.0411	0.146	0.00148	0.383	0.767	0.000139	0.000137	0.0175	0.0114	0.0477	0.0205	0.0206	0.181	0.0937	0.409	0.0837	0.606	0.534	0.0212	1	0.0449	0.12	1e-06	0.0598	1.42e-05	0.0176	0.218	0.713	0.655	0.339	0.0531	1.61e-20	0.198	0.181	0.000696	0.353	0.777	2.36e-12	0.0876	0.456
Fetal_Muscle_Leg_Fetal_Muscle_UW.Fetal_Muscle_Leg.ChromatinAccessibility.H-24198.DS19158.twopass.merge150.wgt10.zgt2.wig.gz	0.00046	7.76e-10	0.0125	0.0369	0.348	0.544	0.00592	0.0222	0.0342	0.135	0.275	0.00271	0.566	0.841	0.000165	2.08e-06	0.311	0.044	0.153	0.000505	0.139	0.818	0.00232	0.446	0.159	0.505	0.876	6.1e-05	1	0.213	0.529	4.12e-06	0.0347	0.000637	0.000292	0.294	0.6	0.73	0.791	0.0132	3.29e-25	0.277	0.104	0.0035	0.557	1	3.38e-11	0.0966	0.396
Fetal_Muscle_Leg_Fetal_Muscle_UW.Fetal_Muscle_Leg.ChromatinAccessibility.H-24218.DS19115.twopass.merge150.wgt10.zgt2.wig.gz	5.19e-05	9.16e-08	0.0475	0.031	0.0184	0.691	0.00516	0.00912	0.0175	0.0395	0.0882	0.000182	0.384	0.889	0.000579	5.37e-06	0.115	0.0866	0.114	5.09e-05	0.184	0.125	0.0502	0.357	0.169	0.589	0.886	0.000152	1	0.0928	0.125	7.33e-06	0.0109	1.42e-05	0.01	0.171	0.542	0.641	0.262	0.00692	5.62e-27	0.11	0.323	0.00189	0.612	0.8	1.24e-10	0.12	0.493
Fetal_Muscle_Leg_Fetal_Muscle_UW.Fetal_Muscle_Leg.ChromatinAccessibility.H-24244.DS19272.twopass.merge150.wgt10.zgt2.wig.gz	0.00431	2.3e-09	0.00389	0.0289	0.0219	0.643	0.00247	0.00674	0.0538	0.113	0.141	0.000458	0.283	0.767	0.00014	1.48e-05	0.0192	0.118	0.369	0.0081	0.228	0.677	0.0193	0.409	0.0338	0.489	0.407	0.000802	1	0.237	0.116	5.24e-07	0.00988	1.14e-05	0.00285	0.177	0.411	0.583	0.106	0.0241	1.8e-30	0.213	0.0844	0.00407	0.193	0.812	1.58e-10	0.21	0.559
Fetal_Muscle_Leg_Fetal_Muscle_UW.Fetal_Muscle_Leg.ChromatinAccessibility.H-24259.DS19291.twopass.merge150.wgt10.zgt2.wig.gz	0.000307	7.4e-08	0.00302	0.107	0.0541	0.885	0.0643	0.000137	0.0145	0.0395	0.0863	0.000437	0.446	0.885	0.00666	8.4e-05	0.0216	0.171	0.0536	0.000245	0.316	0.597	0.0617	0.286	0.205	0.63	0.522	0.0029	1	0.184	0.0851	0.000273	0.0314	0.000207	0.000691	0.254	0.542	0.809	0.519	0.0686	1.94e-25	0.0505	0.422	0.00884	0.467	0.8	1.81e-12	0.164	0.675
Fetal_Muscle_Leg_Fetal_Muscle_UW.Fetal_Muscle_Leg.ChromatinAccessibility.H-24279.DS19436.twopass.merge150.wgt10.zgt2.wig.gz	0.0129	3.72e-08	0.00302	0.0367	0.0442	0.656	0.000606	0.00666	0.0215	0.0914	0.221	3.78e-05	0.475	0.889	5.44e-05	2.35e-07	0.00772	0.0448	0.281	0.0149	0.152	0.253	0.0442	0.286	0.126	0.802	0.24	0.00184	1	0.314	0.0975	1.66e-07	0.0299	7.89e-06	0.00108	0.149	0.542	0.556	0.0905	0.00324	1.83e-28	0.239	0.226	0.0112	0.366	0.8	5.95e-12	0.14	0.349
Fetal_Muscle_Leg_Fetal_Muscle_UW.Fetal_Muscle_Leg.ChromatinAccessibility.H-24297.DS19643.twopass.merge150.wgt10.zgt2.wig.gz	0.0192	2.38e-08	0.00302	0.0217	0.0725	0.656	0.00592	0.00175	0.00223	0.0922	0.309	0.00141	0.267	0.889	0.000167	3.6e-07	0.0135	0.0378	0.0188	0.0488	0.103	0.253	0.0562	0.419	0.00435	0.799	0.749	0.0299	1	0.15	0.111	7.26e-09	0.059	1.1e-05	0.00102	0.59	0.373	0.893	0.576	0.00917	1.57e-26	0.094	0.297	0.00216	0.224	0.803	1.39e-11	0.0801	0.442
Fetal_Muscle_Leg_Fetal_Muscle_UW.Fetal_Muscle_Leg.ChromatinAccessibility.H-24409.DS20239.twopass.merge150.wgt10.zgt2.wig.gz	0.00386	1.9e-12	0.00263	0.0113	0.0105	0.691	4.14e-05	0.000137	0.0324	0.0395	0.164	0.000657	0.267	0.757	5.94e-05	5.81e-07	0.0173	0.0177	0.239	0.00295	0.0271	0.555	0.0279	0.273	0.00572	0.604	0.678	0.000484	1	0.0504	0.0723	4.08e-11	0.0062	5.31e-08	0.00131	0.107	0.543	0.805	0.0264	0.00859	5.04e-29	0.142	0.125	0.0286	0.353	0.804	1.2e-09	0.11	0.644
Fetal_Muscle_Lower_Limb_Skeletal_Fetal_Muscle_UW.Fetal_Muscle_Lower_Limb_Skeletal.ChromatinAccessibility.H-24042.DS18174.twopass.merge150.wgt10.zgt2.wig.gz	0.00023	6.14e-13	0.00302	0.00386	0.0283	0.674	0.00594	0.002	0.00173	0.0395	0.0772	0.000172	0.0543	0.74	5.95e-06	2.34e-07	0.0136	0.024	0.0851	0.000312	0.0375	0.631	0.00232	0.382	0.00442	0.174	0.314	0.00172	1	0.0165	0.131	4.94e-11	0.0888	1.97e-07	0.00103	0.291	0.499	0.467	0.0177	6.14e-05	6.82e-32	0.011	0.278	0.000729	0.595	0.664	5.94e-11	0.262	0.634
Fetal_Muscle_Trunk_Fetal_Muscle_UW.Fetal_Muscle_Trunk.ChromatinAccessibility.H-23941.DS17827.twopass.merge150.wgt10.zgt2.wig.gz	0.0411	6.78e-11	0.00302	0.00307	0.00543	0.464	0.000828	0.000118	0.00725	0.0339	0.108	0.000157	0.0965	0.465	0.000171	1.21e-06	0.0338	0.00536	0.22	0.0486	0.0237	0.174	0.174	0.396	0.00442	0.339	0.332	0.0105	1	0.12	0.0617	3.02e-10	0.0335	3.07e-05	0.000307	0.0875	0.542	0.581	0.137	0.00553	2.35e-26	0.185	0.257	0.0828	0.444	0.8	6.02e-11	0.0603	0.532
Fetal_Muscle_Trunk_Fetal_Muscle_UW.Fetal_Muscle_Trunk.ChromatinAccessibility.H-24409.DS20242.twopass.merge150.wgt10.zgt2.wig.gz	0.00375	8.46e-10	0.0138	0.0468	0.0187	0.75	0.000576	0.00656	0.0355	0.105	0.0554	0.000121	0.313	0.913	5.53e-05	1.38e-06	0.0339	0.0908	0.164	0.00267	0.191	0.125	0.0454	0.298	0.00742	0.74	0.653	0.00321	1	0.0823	0.131	4.04e-06	0.00988	3.3e-06	0.000171	0.319	0.543	0.72	0.251	0.0132	9e-26	0.0729	0.091	0.00612	0.193	0.812	1.29e-12	0.232	0.437
Fetal_Muscle_Trunk_Fetal_Muscle_UW.Fetal_Muscle_Trunk.ChromatinAccessibility.H-24507.DS20544.twopass.merge150.wgt10.zgt2.wig.gz	0.00908	3.19e-08	0.0298	0.074	0.0219	0.544	0.0125	0.0361	0.0672	0.0908	0.177	0.000927	0.227	0.984	0.000507	4.3e-05	0.0649	0.122	0.554	0.0124	0.184	0.232	0.0188	0.498	0.0277	0.765	0.516	0.00808	1	0.194	0.0459	6.13e-09	0.0054	3.27e-05	8.18e-05	0.425	0.542	0.335	0.0783	0.0155	1.49e-21	0.0499	0.188	0.0204	0.448	0.8	2.54e-13	0.069	0.416
Fetal_Muscle_Upper_Limb_Skeletal_Fetal_Muscle_UW.Fetal_Muscle_Upper_Limb_Skeletal.ChromatinAccessibility.H-23887.DS17661.twopass.merge150.wgt10.zgt2.wig.gz	0.00116	4.25e-13	0.122	0.0105	0.134	0.669	0.0258	0.000856	0.00132	0.0113	0.197	0.000108	0.384	0.648	0.000165	8.74e-05	0.00918	0.0237	0.0111	0.00393	0.0391	0.58	0.000199	0.57	0.052	0.589	0.202	0.000726	1	0.0124	0.0799	5.39e-09	0.00835	3.3e-06	0.000371	0.277	0.728	0.411	0.474	0.0791	1.66e-21	0.0516	0.149	0.00186	0.587	1	6.4e-12	0.0417	0.675
Fetal_Muscle_Upper_Trunk_Fetal_Muscle_UW.Fetal_Muscle_Upper_Trunk.ChromatinAccessibility.H-23887.DS17664.twopass.merge150.wgt10.zgt2.wig.gz	0.00075	7.16e-13	0.0143	0.00483	0.0964	0.249	0.000767	0.000524	0.00689	0.0221	0.091	0.000214	0.566	0.399	5.19e-05	1.44e-06	0.0181	0.0134	0.178	0.00143	0.0237	0.137	0.00292	0.327	0.0178	0.383	0.269	0.0067	1	0.0668	0.251	1.14e-07	0.000859	3.84e-07	0.000107	0.132	0.551	0.571	0.0526	0.00724	9.17e-28	0.281	0.149	0.00398	0.506	0.088	3.33e-11	0.0117	0.634
Fetal_Placenta_Fetal_Placenta_UW.Fetal_Placenta.ChromatinAccessibility.H-23887.DS17639.twopass.merge150.wgt10.zgt2.wig.gz	0.073	4.52e-12	0.00302	0.00203	0.000603	0.752	0.0136	0.000403	1.49e-05	0.066	0.0546	1.94e-05	0.221	0.629	0.000563	2.34e-07	0.00163	0.0228	0.0266	0.0581	0.0237	0.0304	0.02	0.72	0.0178	0.397	0.00126	0.011	1	0.152	0.0225	5.97e-09	0.00932	0.000941	0.314	0.243	0.46	0.604	0.000154	0.0011	1.07e-16	4.16e-05	0.104	0.241	0.928	0.599	0.0134	0.172	0.984
Fetal_Placenta_Fetal_Placenta_UW.Fetal_Placenta.ChromatinAccessibility.H-23914.DS17744.twopass.merge150.wgt10.zgt2.wig.gz	0.00125	1.5e-14	0.00302	0.00621	0.000339	0.656	0.0819	4.35e-05	0.00133	0.0815	0.283	7.06e-06	0.381	0.485	0.00154	2.79e-07	0.00814	0.0385	0.179	0.000754	0.042	0.0655	0.00199	0.387	0.178	0.367	0.292	0.0032	0.662	0.0181	0.0134	7.11e-12	0.000765	0.00115	0.317	0.171	0.148	0.548	0.0266	0.0273	5.83e-17	1.23e-05	0.091	0.529	0.904	0.8	0.00301	0.2	0.957
Fetal_Placenta_Fetal_Placenta_UW.Fetal_Placenta.ChromatinAccessibility.H-24272.DS19391.twopass.merge150.wgt10.zgt2.wig.gz	0.0083	2.26e-09	0.0148	0.00435	0.000773	0.544	0.0492	0.00771	1.19e-05	0.0815	0.0784	0.00023	0.383	1	0.00157	1.63e-05	0.00131	0.0166	0.142	0.0082	0.0271	0.457	0.0458	0.608	0.148	0.722	0.537	0.0048	1	0.32	0.0415	1.47e-08	0.0161	0.00634	0.222	0.171	0.542	0.685	0.0144	0.0666	1.68e-16	0.000123	0.111	0.291	0.778	0.8	0.00367	0.0728	0.883
Fetal_Placenta_Fetal_Placenta_UW.Fetal_Placenta.ChromatinAccessibility.H-24409.DS20346.twopass.merge150.wgt10.zgt2.wig.gz	0.0201	7.09e-08	0.00302	0.0104	0.00587	0.544	0.0516	0.0127	0.00223	0.189	0.39	0.000174	0.383	0.276	0.00132	0.000164	0.00399	0.0321	0.239	0.0257	0.0237	0.151	0.0111	0.474	0.0656	0.189	0.332	0.0221	1	0.385	0.00882	8.45e-11	0.00477	0.000836	0.474	0.132	0.542	0.512	0.00157	0.0659	5.77e-11	6.91e-05	0.133	0.0867	0.753	0.446	0.00723	0.0946	0.875
Fetal_Renal_Cortex_Left_Fetal_Renal_Cortex_UW.Fetal_Renal_Cortex_Left.ChromatinAccessibility.H-23871.DS17550.twopass.merge150.wgt10.zgt2.wig.gz	0.0128	1.1e-07	0.0465	0.184	0.0477	0.691	0.000324	0.00795	0.182	0.283	0.00969	0.0853	0.433	0.578	4.52e-06	5.4e-05	0.17	0.247	0.696	0.00863	0.253	0.116	0.194	0.36	0.678	0.504	0.0327	0.000125	1	0.166	0.198	1.49e-05	0.102	1.3e-06	0.00406	0.267	0.728	0.394	0.135	0.00516	2.37e-16	0.045	0.16	0.000912	0.0686	0.553	1.88e-09	0.0264	0.644
Fetal_Renal_Cortex_Left_Fetal_Renal_Cortex_UW.Fetal_Renal_Cortex_Left.ChromatinAccessibility.H-24111.DS18542.twopass.merge150.wgt10.zgt2.wig.gz	0.00141	0.001	0.0256	0.173	0.204	0.556	0.0017	0.025	0.0412	0.322	0.0942	0.0405	0.645	1	4.52e-06	0.000159	0.0425	0.284	0.26	0.00143	0.393	0.0824	0.139	0.329	0.723	0.367	0.29	0.00031	1	0.39	0.707	0.000383	0.0544	1.1e-05	0.00487	0.422	0.476	0.411	0.106	0.0643	8.11e-12	0.0802	0.218	0.0196	0.166	0.553	1.39e-11	0.0419	0.744
Fetal_Renal_Cortex_Left_Fetal_Renal_Cortex_UW.Fetal_Renal_Cortex_Left.ChromatinAccessibility.H-24169.DS18931.twopass.merge150.wgt10.zgt2.wig.gz	0.0101	1.27e-07	0.00502	0.0164	0.0402	0.752	0.000526	0.0575	0.0324	0.174	0.0387	0.00505	0.512	0.465	6.48e-06	8.78e-05	0.131	0.0301	0.346	0.00569	0.0499	0.186	0.126	0.256	0.166	0.338	0.00846	0.000794	1	0.202	0.249	4.78e-06	0.0598	7.77e-08	0.00352	0.575	0.542	0.173	0.123	0.303	2.86e-19	0.0655	0.104	0.000912	0.183	0.46	3.32e-11	0.317	0.435
Fetal_Renal_Cortex_Left_Fetal_Renal_Cortex_UW.Fetal_Renal_Cortex_Left.ChromatinAccessibility.H-24232.DS19257.twopass.merge150.wgt10.zgt2.wig.gz	0.00075	0.000109	0.00263	0.209	0.0129	0.544	0.00375	0.00666	0.286	0.136	0.0105	0.322	0.476	0.942	3.99e-05	0.000662	0.195	0.348	0.809	0.000685	0.576	0.0655	0.379	0.378	0.484	0.505	0.094	0.000546	1	0.18	0.241	1.4e-05	0.0501	3.05e-07	0.00595	0.302	0.574	0.356	0.0526	0.038	1.25e-20	0.0137	0.072	0.000298	0.312	0.0912	2.49e-10	0.0674	0.634
Fetal_Renal_Cortex_Right_Fetal_Renal_Cortex_UW.Fetal_Renal_Cortex_Right.ChromatinAccessibility.H-23871.DS17545.twopass.merge150.wgt10.zgt2.wig.gz	0.0143	8.59e-06	0.0576	0.125	0.153	0.544	0.00719	0.108	0.0467	0.291	0.0573	0.00533	0.592	0.812	2.4e-05	0.000486	0.0671	0.26	0.316	0.00845	0.141	0.0655	0.0768	0.434	0.259	0.489	0.458	0.00074	1	0.262	0.418	2.43e-06	0.0918	1.75e-05	0.00257	0.445	0.568	0.269	0.117	0.0863	1.24e-11	0.0516	0.177	0.00256	0.127	0.559	7.91e-09	0.188	0.964
Fetal_Renal_Cortex_Right_Fetal_Renal_Cortex_UW.Fetal_Renal_Cortex_Right.ChromatinAccessibility.H-24169.DS18928.twopass.merge150.wgt10.zgt2.wig.gz	0.00102	6.7e-06	0.00729	0.208	0.0422	0.656	0.000305	0.0017	0.113	0.216	0.00707	0.0283	0.592	0.501	4.12e-05	0.000116	0.244	0.271	0.369	0.00073	0.269	0.212	0.0163	0.409	0.379	0.606	0.00802	0.00025	1	0.0834	0.216	3.56e-06	0.00919	6.07e-07	0.00877	0.443	0.728	0.104	0.532	0.0114	2.35e-16	0.116	0.225	0.0108	0.315	0.214	6.15e-10	0.0628	0.342
Fetal_Renal_Cortex_Right_Fetal_Renal_Cortex_UW.Fetal_Renal_Cortex_Right.ChromatinAccessibility.H-24232.DS19254.twopass.merge150.wgt10.zgt2.wig.gz	0.000307	1.17e-08	0.0114	0.0841	0.0126	0.609	0.000231	0.0883	0.118	0.114	0.0181	0.0313	0.306	0.767	2.41e-06	0.000257	0.126	0.259	0.523	0.000245	0.339	0.108	0.0659	0.588	0.484	0.489	0.0529	8.35e-05	1	0.0483	0.18	2.14e-06	0.0182	2.5e-08	0.00116	0.3	0.728	0.142	0.0144	0.0304	9.76e-23	0.0351	0.0902	0.00298	0.0652	0.227	8.8e-10	0.0235	0.456
Fetal_Renal_Cortex_Fetal_Renal_Cortex_UW.Fetal_Renal_Cortex.ChromatinAccessibility.H-23769.DS17307.twopass.merge150.wgt10.zgt2.wig.gz	0.00023	8.37e-06	0.00381	0.0242	0.0122	0.691	0.000131	0.00343	0.146	0.279	0.0541	0.00882	0.477	0.802	1.05e-05	1.69e-05	0.381	0.092	0.41	0.000139	0.142	0.291	0.284	0.286	0.102	0.765	0.189	0.000236	1	0.0843	0.0453	5.76e-06	0.021	8.18e-06	0.000665	0.611	0.23	0.165	0.0306	0.0132	1.48e-16	0.0384	0.247	0.000696	0.126	0.564	8.09e-10	0.0296	0.636
Fetal_Renal_Cortex_Fetal_Renal_Cortex_UW.Fetal_Renal_Cortex.ChromatinAccessibility.H-23790.DS17387.twopass.merge150.wgt10.zgt2.wig.gz	0.018	2.91e-09	0.00381	0.00435	0.00587	0.656	0.000207	0.00588	0.0843	0.191	0.0146	0.00453	0.645	0.468	1.52e-06	2.8e-06	0.0556	0.0177	0.228	0.0118	0.0506	0.0702	0.061	0.386	0.147	0.231	0.0353	0.00107	1	0.0657	0.131	1e-05	0.0153	9.26e-09	0.00274	0.462	0.542	0.347	0.00678	0.00335	7.46e-25	0.088	0.522	0.00612	0.467	0.0759	8.5e-10	0.0462	0.492
Fetal_Renal_Cortex_Fetal_Renal_Cortex_UW.Fetal_Renal_Cortex.ChromatinAccessibility.H-23833.DS17455.twopass.merge150.wgt10.zgt2.wig.gz	0.0172	2.02e-07	0.00309	0.045	0.00102	0.675	0.000127	0.013	0.0265	0.101	0.0142	0.000776	0.825	0.984	6.02e-06	8.25e-07	0.0232	0.116	0.711	0.0122	0.184	0.0655	0.114	0.365	0.251	0.641	0.0684	0.00307	1	0.0415	0.131	8.69e-06	0.0118	9.7e-07	0.00528	0.398	0.542	0.165	0.0365	0.00114	4.04e-21	0.0147	0.0831	0.000614	0.242	0.0759	9.83e-11	0.0709	0.644
Fetal_Renal_Cortex_Fetal_Renal_Cortex_UW.Fetal_Renal_Cortex.ChromatinAccessibility.H-23914.DS17756.twopass.merge150.wgt10.zgt2.wig.gz	0.0978	3.37e-09	0.00996	0.0349	0.00587	0.544	0.00143	0.0298	0.00662	0.136	0.005	0.00365	0.678	0.532	0.000822	2.45e-06	0.00726	0.0908	0.707	0.0515	0.152	0.0084	0.00156	0.291	0.271	0.504	0.0131	0.00242	1	0.11	0.0442	7.1e-05	0.00741	5.47e-09	0.0104	0.218	0.542	0.233	0.236	0.0186	1.09e-19	0.00634	0.104	0.0995	0.0824	0.126	6.97e-11	0.0966	0.729
Fetal_Renal_Cortex_Fetal_Renal_Cortex_UW.Fetal_Renal_Cortex.ChromatinAccessibility.H-23941.DS17804.twopass.merge150.wgt10.zgt2.wig.gz	0.00381	1.06e-06	0.0168	0.0369	0.0108	0.691	0.000405	0.018	0.08	0.0897	0.0142	0.00089	0.513	0.883	1.78e-05	2.34e-07	0.0771	0.0991	0.416	0.0025	0.164	0.174	0.504	0.223	0.371	0.609	0.0353	2.5e-05	1	0.0396	0.237	8.74e-06	0.0331	5.81e-07	0.00528	0.337	0.542	0.432	0.2	0.00796	4.08e-20	0.00474	0.0675	0.000363	0.366	0.0759	1.46e-09	0.0978	0.729
Fetal_Renal_Cortex_Fetal_Renal_Cortex_UW.Fetal_Renal_Cortex.ChromatinAccessibility.H-24078.DS18428.twopass.merge150.wgt10.zgt2.wig.gz	0.000727	4.94e-05	0.0146	0.418	0.0587	0.609	0.000426	0.102	0.0978	0.0484	0.00707	0.0433	0.678	0.767	3.5e-05	0.000676	0.195	0.59	0.174	0.000511	0.689	0.307	0.0734	0.28	0.224	0.799	0.275	0.000818	1	0.278	0.252	0.0023	0.0226	1.53e-06	0.000757	0.482	0.728	0.359	0.0538	0.109	2.45e-14	0.0612	0.278	0.000463	0.326	0.551	8.15e-09	0.0966	0.66
Fetal_Renal_Cortex_Fetal_Renal_Cortex_UW.Fetal_Renal_Cortex.ChromatinAccessibility.H-24259.DS19388.twopass.merge150.wgt10.zgt2.wig.gz	0.00276	1.89e-06	0.0698	0.292	0.00587	0.768	0.000616	0.00358	0.138	0.184	0.00263	0.0166	0.594	1	0.00014	2.45e-06	0.292	0.47	0.819	0.0016	0.583	0.157	0.189	0.267	0.207	0.691	0.0928	0.000124	1	0.405	0.0516	1.34e-06	0.0201	9.26e-09	0.00737	0.377	0.542	0.173	0.0261	0.00123	1.07e-25	0.0162	0.149	0.000463	0.159	0.449	1.97e-09	0.118	0.246
Fetal_Renal_Cortex_Fetal_Renal_Cortex_UW.Fetal_Renal_Cortex.ChromatinAccessibility.H-24493.DS20568.twopass.merge150.wgt10.zgt2.wig.gz	0.0143	7.85e-09	0.0298	0.0289	0.0228	0.829	0.000471	0.00284	0.0981	0.227	0.00479	0.0122	0.579	0.767	1.99e-05	8.14e-06	0.145	0.0753	0.397	0.00989	0.0823	0.0879	0.0719	0.365	0.148	0.313	0.0157	0.000143	1	0.105	0.209	1.14e-05	0.0298	1.52e-07	0.0153	0.445	0.373	0.37	0.037	0.0336	1.43e-18	0.0174	0.109	0.00258	0.0321	0.0759	7.36e-10	0.00499	0.598
Fetal_Renal_Pelvis_Left_Fetal_Renal_Pelvis_UW.Fetal_Renal_Pelvis_Left.ChromatinAccessibility.H-23871.DS17553.twopass.merge150.wgt10.zgt2.wig.gz	0.00258	1.94e-07	0.0443	0.043	0.0162	0.752	0.00116	0.00358	0.101	0.116	0.00819	0.00916	0.645	0.127	1.52e-06	1.72e-05	0.106	0.158	0.474	0.000892	0.228	0.0962	0.379	0.49	0.532	0.772	0.296	8.35e-05	1	0.101	0.398	8.95e-06	0.101	8.82e-07	0.00697	0.319	0.728	0.304	0.0306	0.0598	2.02e-16	0.0692	0.104	0.00857	0.141	0.227	1.68e-10	0.21	0.552
Fetal_Renal_Pelvis_Left_Fetal_Renal_Pelvis_UW.Fetal_Renal_Pelvis_Left.ChromatinAccessibility.H-24111.DS18666.twopass.merge150.wgt10.zgt2.wig.gz	0.0109	1.02e-07	0.00263	0.0461	0.0115	0.752	0.00137	0.0109	0.0194	0.178	0.0197	0.00112	0.786	0.859	5.38e-05	4.23e-06	0.0346	0.0753	0.485	0.00626	0.124	0.0423	0.0394	0.196	0.36	0.809	0.0855	0.00312	1	0.0456	0.248	8.51e-06	0.0291	2.67e-07	7.62e-05	0.241	0.728	0.18	0.0235	0.00724	9.49e-20	0.0162	0.0831	0.000903	0.112	0.168	3.31e-11	0.0496	0.368
Fetal_Renal_Pelvis_Left_Fetal_Renal_Pelvis_UW.Fetal_Renal_Pelvis_Left.ChromatinAccessibility.H-24169.DS18964.twopass.merge150.wgt10.zgt2.wig.gz	0.00834	6.03e-06	0.00263	0.118	0.0246	0.656	0.000297	0.00322	0.0233	0.0813	0.0161	2.98e-05	0.29	0.0839	1.52e-06	2.63e-06	0.0134	0.154	0.314	0.00491	0.175	0.0423	0.0902	0.451	0.156	0.54	0.0369	4.17e-05	1	0.0138	0.241	4.8e-06	0.0317	2.93e-07	0.000691	0.142	0.542	0.165	0.00908	0.0138	6.45e-23	0.011	0.177	0.000729	0.112	0.0759	2.42e-10	0.0439	0.349
Fetal_Renal_Pelvis_Left_Fetal_Renal_Pelvis_UW.Fetal_Renal_Pelvis_Left.ChromatinAccessibility.H-24232.DS19238.twopass.merge150.wgt10.zgt2.wig.gz	0.00611	2.58e-06	0.02	0.0982	0.0178	0.308	0.000338	0.0182	0.111	0.0917	0.00384	0.0262	0.54	0.984	2.84e-05	0.000241	0.111	0.204	0.685	0.00393	0.293	0.0718	0.133	0.409	0.458	0.54	0.0193	0.000296	1	0.0876	0.262	0.000858	0.00261	7.13e-08	0.0285	0.294	0.542	0.512	0.00908	0.0114	2.91e-18	0.00378	0.574	0.000339	0.193	0.204	4.99e-11	0.0603	0.927
Fetal_Renal_Pelvis_Right_Fetal_Renal_Pelvis_UW.Fetal_Renal_Pelvis_Right.ChromatinAccessibility.H-23871.DS17548.twopass.merge150.wgt10.zgt2.wig.gz	0.0138	5.9e-08	0.0324	0.0361	0.206	0.544	0.000483	0.0938	0.0367	0.0567	0.00263	0.00579	0.395	0.928	7.46e-06	6.16e-05	0.0539	0.0609	0.396	0.00942	0.1	0.0834	0.138	0.28	0.057	0.348	0.0327	0.000236	1	0.0504	0.0922	0.000161	0.0335	4.27e-07	0.00151	0.521	0.561	0.571	0.0205	0.00183	4.3e-26	0.0818	0.149	0.00398	0.132	0.248	2.22e-09	0.0794	0.408
Fetal_Renal_Pelvis_Right_Fetal_Renal_Pelvis_UW.Fetal_Renal_Pelvis_Right.ChromatinAccessibility.H-24111.DS18663.twopass.merge150.wgt10.zgt2.wig.gz	0.0945	8.77e-06	0.0108	0.0283	0.0266	0.675	0.000396	0.003	0.215	0.234	0.00956	0.0236	0.772	0.989	5.07e-06	1.14e-05	0.393	0.0753	0.303	0.0612	0.124	0.113	0.0516	0.378	0.161	0.589	0.332	0.0067	1	0.107	0.449	7.59e-05	0.022	5.12e-06	0.00513	0.297	0.728	0.207	0.127	0.0109	6.29e-15	0.0483	0.177	0.00623	0.353	0.0762	2.42e-10	0.0344	0.729
Fetal_Renal_Pelvis_Right_Fetal_Renal_Pelvis_UW.Fetal_Renal_Pelvis_Right.ChromatinAccessibility.H-24169.DS18961.twopass.merge150.wgt10.zgt2.wig.gz	0.0289	1.3e-08	0.00389	0.0848	0.0219	0.646	0.000131	0.00546	0.0109	0.184	0.00707	0.00685	0.656	0.874	5.95e-06	0.000156	0.0101	0.141	0.411	0.0171	0.207	0.0655	0.213	0.378	0.138	0.504	0.0852	0.00174	1	0.163	0.0122	0.00119	0.0185	1.77e-06	0.00308	0.322	0.352	0.118	0.0466	0.0856	2.18e-21	0.0123	0.243	0.00216	0.0798	0.46	3.7e-10	0.0417	0.349
Fetal_Renal_Pelvis_Right_Fetal_Renal_Pelvis_UW.Fetal_Renal_Pelvis_Right.ChromatinAccessibility.H-24232.DS19235.twopass.merge150.wgt10.zgt2.wig.gz	0.0143	1.39e-05	0.0185	0.21	0.0339	0.691	0.000297	0.0387	0.15	0.401	0.0634	0.0557	0.639	0.872	0.000165	0.000212	0.215	0.348	0.495	0.0165	0.486	0.0655	0.0675	0.378	0.255	0.191	0.0327	0.007	1	0.143	0.131	0.00368	0.0246	3.5e-07	0.000555	0.443	0.542	0.264	0.0426	0.0141	1.05e-19	0.0325	0.227	0.00556	0.438	0.435	9.21e-10	0.0867	0.634
Fetal_Renal_Pelvis_Fetal_Renal_Pelvis_UW.Fetal_Renal_Pelvis.ChromatinAccessibility.H-23790.DS17381.twopass.merge150.wgt10.zgt2.wig.gz	0.0558	2.28e-09	0.00306	0.00903	0.0069	0.677	0.000171	0.002	0.0579	0.0922	0.00263	0.00497	0.668	0.501	1.52e-06	6.77e-07	0.0878	0.0448	0.809	0.0412	0.0856	0.0655	0.0466	0.41	0.0362	0.463	0.0131	0.0002	1	0.232	0.076	0.0001	0.0721	2.5e-08	0.0129	0.377	0.373	0.139	0.00543	0.00375	1.76e-26	0.0479	0.152	0.000498	0.193	0.0764	3.36e-09	0.0623	0.349
Fetal_Renal_Pelvis_Fetal_Renal_Pelvis_UW.Fetal_Renal_Pelvis.ChromatinAccessibility.H-23833.DS17451.twopass.merge150.wgt10.zgt2.wig.gz	0.0353	5.71e-07	0.0293	0.215	0.0295	0.26	0.000175	0.00287	0.0975	0.247	0.00707	0.00374	0.615	0.912	1.52e-06	5.78e-06	0.015	0.284	0.66	0.0135	0.372	0.209	0.0504	0.224	0.0443	0.365	0.232	0.000236	0.662	0.0219	0.0475	0.000137	0.00462	4.37e-07	0.000802	0.363	0.542	0.121	0.0379	0.0377	1.7e-19	0.0388	0.262	0.00139	0.159	0.232	1.46e-09	0.0603	0.53
Fetal_Renal_Pelvis_Fetal_Renal_Pelvis_UW.Fetal_Renal_Pelvis.ChromatinAccessibility.H-23914.DS17760.twopass.merge150.wgt10.zgt2.wig.gz	0.0283	5.4e-10	0.0046	0.0763	0.000118	0.656	0.000455	0.0254	0.00799	0.23	0.00263	0.00226	0.186	0.889	6.14e-06	2.09e-06	0.0215	0.307	0.551	0.0205	0.317	0.0653	0.0504	0.286	0.00906	0.609	0.00511	0.000236	1	0.0396	0.0158	4.78e-06	0.0054	1.11e-07	0.000589	0.171	0.373	0.32	7.73e-05	0.00245	6.09e-29	0.00464	0.121	0.000845	0.0117	0.088	1.37e-10	0.0595	0.279
Fetal_Renal_Pelvis_Fetal_Renal_Pelvis_UW.Fetal_Renal_Pelvis.ChromatinAccessibility.H-24005.DS18088.twopass.merge150.wgt10.zgt2.wig.gz	0.0475	4.69e-06	0.00302	0.0128	0.14	0.675	0.000127	0.0121	0.00809	0.0913	0.00263	0.00218	0.0238	0.465	4.85e-06	4.23e-06	0.015	0.0262	0.331	0.0207	0.0476	0.0655	0.0434	0.457	0.0443	0.693	0.094	0.00504	1	0.0329	0.0394	4.63e-06	0.0291	2.2e-08	0.00427	0.142	0.693	0.0429	5.5e-05	0.0147	3.02e-27	0.0236	0.221	0.0035	0.126	0.126	1.79e-10	0.0224	0.0615
Fetal_Renal_Pelvis_Fetal_Renal_Pelvis_UW.Fetal_Renal_Pelvis.ChromatinAccessibility.H-24078.DS18431.twopass.merge150.wgt10.zgt2.wig.gz	0.00378	0.000268	0.0256	0.374	0.0777	0.79	0.00769	0.00745	0.00807	0.0395	0.00263	0.000206	0.314	0.501	2.43e-05	2.22e-05	0.015	0.698	0.547	0.0025	0.663	0.0584	0.0483	0.315	0.324	0.691	0.317	0.000269	1	0.125	0.282	4.54e-05	0.0118	1.6e-06	0.0162	0.532	0.542	0.411	0.0675	0.0257	3.45e-22	0.0349	0.0946	0.000821	0.136	0.0759	1.97e-09	0.0224	0.426
Fetal_Renal_Pelvis_Fetal_Renal_Pelvis_UW.Fetal_Renal_Pelvis.ChromatinAccessibility.H-24259.DS19386.twopass.merge150.wgt10.zgt2.wig.gz	0.00239	1.81e-09	0.0298	0.0383	0.00266	0.669	0.0433	0.0211	0.277	0.101	0.0146	0.032	0.459	0.727	0.000132	0.000797	0.358	0.0696	0.374	0.0016	0.076	0.213	0.25	0.424	0.101	0.256	0.0327	0.000227	1	0.142	0.125	1.86e-05	0.0735	4.59e-08	0.00771	0.142	1	0.165	0.00705	0.0565	4.12e-18	0.0133	0.0611	0.00517	0.0521	0.0759	3.34e-10	0.0657	0.636
Fetal_Renal_Pelvis_Fetal_Renal_Pelvis_UW.Fetal_Renal_Pelvis.ChromatinAccessibility.H-24477.DS20448.twopass.merge150.wgt10.zgt2.wig.gz	0.00075	2.91e-07	0.00302	0.0283	0.00212	0.777	0.0075	0.0432	0.093	0.283	0.01	0.00223	0.668	0.802	1.58e-06	2.45e-06	0.184	0.0746	0.411	0.000751	0.116	0.253	0.67	0.273	0.135	0.505	0.0327	4.86e-05	1	0.0504	0.296	2.12e-06	0.0314	1.15e-07	0.0135	0.267	0.437	0.394	0.0312	0.00908	6.56e-19	0.0349	0.0455	0.00125	0.353	0.564	3.38e-11	0.00294	0.634
Fetal_Skin_Fetal_Skin_UW.Fetal_Skin.ChromatinAccessibility.H-22337.DS10987.twopass.merge150.wgt10.zgt2.wig.gz	0.0453	0.000203	0.444	0.235	0.197	0.752	0.0012	0.117	0.0195	0.306	0.0675	0.00218	0.72	0.532	0.000198	0.298	0.0122	0.272	0.498	0.0405	0.396	0.0915	0.152	0.286	0.789	0.944	0.304	0.00429	1	0.551	0.194	0.00529	0.287	0.00012	0.1	0.277	0.713	0.751	0.911	0.125	2.7e-07	0.0797	0.802	0.18	0.362	0.777	1.5e-06	0.451	0.822
Fetal_Spinal_Cord_Fetal_Spinal_Cord_UW.Fetal_Spinal_Cord.ChromatinAccessibility.H-24111.DS18501.twopass.merge150.wgt10.zgt2.wig.gz	0.101	0.000379	0.00578	0.125	0.557	0.751	0.385	0.196	0.119	0.021	0.219	0.0606	0.484	0.984	0.0297	0.107	0.159	0.129	0.547	0.0794	0.184	0.423	0.766	0.118	0.448	0.948	0.446	0.0219	1	0.963	0.0686	0.000199	0.146	0.0503	0.125	0.267	0.639	0.335	0.117	0.0214	3.84e-08	0.802	0.516	0.00831	0.0534	0.599	0.00067	0.0297	0.0455
Fetal_Spinal_Cord_Fetal_Spinal_Cord_UW.Fetal_Spinal_Cord.ChromatinAccessibility.H-24409.DS20351.twopass.merge150.wgt10.zgt2.wig.gz	0.00122	0.000103	0.00381	0.0339	0.0123	0.816	0.0052	0.00335	0.0843	0.00647	0.137	0.00823	0.33	0.889	8.18e-05	0.000138	0.179	0.141	0.809	0.0025	0.207	0.185	0.0436	0.552	0.0537	0.765	0.291	0.00115	1	0.41	0.0922	3.26e-05	0.00933	1.13e-05	0.00352	0.171	0.542	0.0145	0.000831	0.0416	1.39e-16	0.142	0.431	0.00206	0.0723	0.211	9.32e-08	0.0235	0.000124
Fetal_Spinal_Cord_Fetal_Spinal_Cord_UW.Fetal_Spinal_Cord.ChromatinAccessibility.H-24493.DS20530.twopass.merge150.wgt10.zgt2.wig.gz	0.0674	0.00481	0.00857	0.244	0.383	0.887	0.0409	0.0552	0.396	0.00647	0.085	0.0223	0.566	0.984	0.0137	0.0265	0.292	0.216	0.663	0.0412	0.4	0.242	0.0719	0.432	0.445	0.92	0.406	0.00359	1	0.771	0.0617	0.0153	0.0462	0.00284	0.0272	0.462	0.542	0.17	0.02	0.0176	7.9e-13	0.333	0.287	0.0528	0.000375	0.473	2.18e-05	0.00232	0.0219
Fetal_Spleen_Fetal_Spleen_UW.Fetal_Spleen.ChromatinAccessibility.H-23399.DS17448.twopass.merge150.wgt10.zgt2.wig.gz	0.162	3.8e-20	0.118	0.0035	0.00434	0.0315	0.00043	3.34e-10	0.000113	0.176	0.186	4.94e-08	0.399	0.273	1.35e-05	5.45e-05	0.000103	0.0142	0.00459	0.171	0.0167	0.533	1.5e-08	0.286	0.0584	0.0124	0.826	0.00213	0.662	1.11e-05	0.48	1.7e-15	0.0264	1.63e-05	0.00217	0.0759	0.542	0.895	0.279	0.0233	5.04e-11	0.0103	0.00618	0.0431	0.791	0.0759	6.97e-05	0.174	0.795
Fetal_Stomach_Fetal_Stomach_UW.Fetal_Stomach.ChromatinAccessibility.H-23589.DS16530.twopass.merge150.wgt10.zgt2.wig.gz	0.00884	1.09e-12	0.0237	0.00116	0.0129	0.505	0.000171	0.0071	0.000804	0.0147	0.0644	6.52e-05	0.0585	0.273	0.000172	1.2e-06	0.00731	0.00275	0.369	0.0118	0.0103	0.0655	0.00126	0.223	0.057	0.589	0.429	0.0108	0.662	0.0657	0.249	2.34e-06	0.000114	7.06e-08	4.06e-05	0.0759	0.373	0.258	0.00908	0.0304	1.96e-20	0.0664	0.2	0.00382	0.183	0.227	2.15e-07	0.204	0.344
Fetal_Stomach_Fetal_Stomach_UW.Fetal_Stomach.ChromatinAccessibility.H-23758.DS17172.twopass.merge150.wgt10.zgt2.wig.gz	0.0335	4.13e-09	0.00263	0.00167	0.00124	0.271	0.000175	0.0013	0.00456	0.08	0.118	0.00336	0.269	0.674	5.76e-05	3.62e-06	0.0241	0.00886	0.246	0.0398	0.0154	0.147	0.0117	0.2	0.0157	0.609	0.0928	0.0223	1	0.0478	0.195	6.4e-06	0.000836	6.6e-07	7.62e-05	0.132	0.542	0.354	0.0302	0.00254	6.23e-20	0.0726	0.0889	0.00695	0.168	0.214	1.48e-07	0.204	0.442
Fetal_Stomach_Fetal_Stomach_UW.Fetal_Stomach.ChromatinAccessibility.H-23769.DS17325.twopass.merge150.wgt10.zgt2.wig.gz	0.22	5.19e-12	0.202	0.00191	0.015	0.638	0.000295	0.0166	0.0046	0.035	0.0181	0.00244	0.313	0.485	0.000121	6.96e-06	0.0175	0.0141	0.663	0.202	0.0259	0.0676	0.00553	0.286	0.205	0.505	0.28	0.0302	1	0.0465	0.123	5.79e-08	1.25e-05	3.52e-08	0.000212	0.0789	0.713	0.399	0.00406	0.00323	5.19e-22	0.0349	0.402	0.00608	0.0452	0.0685	3.9e-07	0.262	0.358
Fetal_Stomach_Fetal_Stomach_UW.Fetal_Stomach.ChromatinAccessibility.H-23887.DS17659.twopass.merge150.wgt10.zgt2.wig.gz	0.0163	3.53e-09	0.0539	0.0129	0.00618	0.646	0.00214	0.00165	0.015	0.00647	0.0875	0.000338	0.238	0.285	7.67e-05	8.57e-06	0.0508	0.044	0.0417	0.0172	0.124	0.405	0.0163	0.224	0.087	0.856	0.647	0.00565	1	0.0634	0.0723	0.000273	0.00151	7.52e-05	7.62e-05	0.267	0.72	0.181	0.204	0.0132	1.12e-17	0.0309	0.294	0.0126	0.242	0.126	9.33e-08	0.245	0.472
Fetal_Stomach_Fetal_Stomach_UW.Fetal_Stomach.ChromatinAccessibility.H-23914.DS17750.twopass.merge150.wgt10.zgt2.wig.gz	0.0502	3.09e-07	0.0832	0.00264	0.0383	0.505	0.000418	0.0313	0.0113	0.0395	0.0425	0.00446	0.668	0.767	7.82e-05	2.22e-05	0.0425	0.00886	0.195	0.0513	0.0153	0.157	0.00318	0.132	0.573	0.694	0.748	0.0122	1	0.0504	0.295	0.000242	0.0164	2.18e-05	0.000169	0.552	0.725	0.411	0.0302	0.0109	1.1e-18	0.011	0.181	0.00154	0.0381	0.126	3.97e-08	0.057	0.437
Fetal_Stomach_Fetal_Stomach_UW.Fetal_Stomach.ChromatinAccessibility.H-23964.DS17878.twopass.merge150.wgt10.zgt2.wig.gz	0.00108	2.68e-10	0.00302	0.00264	0.00235	0.505	0.000773	7.01e-07	0.000898	0.00647	0.0234	0.000945	0.0185	0.163	0.00111	8.06e-07	0.00367	0.0134	0.00435	0.00206	0.0347	0.143	0.00014	0.329	0.0608	0.496	0.0327	4.17e-05	0.224	0.00026	0.00698	2.46e-06	0.00342	4.15e-07	3.71e-05	0.139	0.373	0.399	0.0232	0.0657	3.45e-22	0.0132	0.578	0.000805	0.473	0.0759	9.83e-07	0.172	0.574
Fetal_Stomach_Fetal_Stomach_UW.Fetal_Stomach.ChromatinAccessibility.H-24005.DS17963.twopass.merge150.wgt10.zgt2.wig.gz	0.0291	1.2e-07	0.00881	0.024	0.0246	0.691	0.000529	0.041	0.0365	0.0446	0.175	0.011	0.166	0.984	0.000648	2.45e-06	0.137	0.0293	0.341	0.0379	0.045	0.191	0.065	0.286	0.0761	0.332	0.527	0.000516	1	0.0914	0.0758	8.78e-05	4.28e-05	3.06e-07	7.62e-05	0.149	0.542	0.304	0.0222	0.0382	3.85e-22	0.252	0.129	0.000722	0.425	0.0855	9.7e-10	0.101	0.298
Fetal_Stomach_Fetal_Stomach_UW.Fetal_Stomach.ChromatinAccessibility.H-24078.DS18389.twopass.merge150.wgt10.zgt2.wig.gz	0.162	4.89e-07	0.00302	0.0291	0.000245	0.605	0.000189	0.00912	0.000559	0.192	0.0693	0.000299	0.098	0.278	0.00138	9.78e-09	0.0148	0.114	0.0974	0.195	0.118	0.119	0.012	0.386	0.0341	0.657	0.293	0.0138	0.662	0.0482	0.027	3.8e-05	0.0345	6.6e-07	0.000677	0.0875	0.542	0.356	0.0236	0.00323	1.38e-22	0.00207	0.287	0.00925	0.296	0.0786	1.52e-07	0.328	0.702
Fetal_Stomach_Fetal_Stomach_UW.Fetal_Stomach.ChromatinAccessibility.H-24125.DS18821.twopass.merge150.wgt10.zgt2.wig.gz	0.0598	1.79e-07	0.122	0.00906	0.0717	0.656	0.000655	0.018	0.0399	0.081	0.121	0.00217	0.0659	0.674	0.000599	2.8e-06	0.0729	0.0213	0.108	0.0348	0.0347	0.499	0.099	0.273	0.0755	0.54	0.292	0.00978	1	0.389	0.278	1.12e-05	0.00516	1.57e-07	0.000334	0.218	0.542	0.399	0.0685	0.0232	1.04e-20	0.0641	0.138	0.00154	0.238	0.0764	1.79e-10	0.201	0.634
Fetal_Stomach_Fetal_Stomach_UW.Fetal_Stomach.ChromatinAccessibility.H-24401.DS20349.twopass.merge150.wgt10.zgt2.wig.gz	0.0181	3.93e-10	0.0285	0.00794	0.00677	0.314	0.000955	0.0013	0.0231	0.0835	0.0273	0.00286	0.448	0.501	0.000159	3.62e-06	0.0903	0.0126	0.28	0.0253	0.0329	0.178	0.00327	0.173	0.0755	0.415	0.0928	0.00228	1	0.068	0.311	8.75e-10	0.00129	6.73e-07	0.00132	0.171	0.542	0.411	0.0752	0.15	2.1e-20	0.0428	0.221	0.00524	0.103	0.0781	6.86e-11	0.176	0.475
Fetal_Stomach_Fetal_Stomach_UW.Fetal_Stomach.ChromatinAccessibility.H-24507.DS20546.twopass.merge150.wgt10.zgt2.wig.gz	0.0294	1.96e-10	0.0293	0.00303	0.00184	0.656	8.88e-07	0.00264	0.00161	0.0356	0.0351	0.000927	0.121	0.883	0.000159	2.21e-06	0.00581	0.0104	0.444	0.0341	0.0154	0.189	0.00156	0.132	0.19	0.423	0.483	0.00967	0.662	0.00459	0.118	1.75e-06	0.00476	2.74e-08	0.000182	0.226	0.542	0.411	0.0161	0.00353	5.56e-19	0.00172	0.142	0.0035	0.0232	0.0759	4.77e-09	0.289	0.644
Fetal_Testes_Fetal_Testes_UW.Fetal_Testes.ChromatinAccessibility.H24198_H23640_H24042.DS18942.twopass.merge150.wgt10.zgt2.wig.gz	0.00783	1.76e-06	0.177	0.2	0.129	0.505	0.000617	0.0224	0.0365	0.0306	0.041	0.0129	0.566	0.648	5.83e-05	1.4e-05	0.0413	0.336	0.486	0.00942	0.434	0.616	0.0431	0.197	0.0162	0.91	0.293	0.00897	1	0.149	0.575	0.000559	0.0647	3.24e-07	0.000425	0.302	0.728	0.361	0.236	0.191	4.12e-20	0.302	0.378	0.00279	0.228	0.519	2e-10	0.083	0.0678
Fetal_Thymus_Fetal_Thymus_UW.Fetal_Thymus.ChromatinAccessibility.H-23589.DS16490.twopass.merge150.wgt10.zgt2.wig.gz	0.111	7.05e-13	0.128	0.0366	3.97e-06	0.0862	0.00909	4.15e-05	2.74e-10	0.0275	0.613	5.54e-13	0.0106	0.0839	0.116	0.308	6.1e-09	0.042	6.26e-06	0.196	0.0704	1	6.45e-10	0.396	0.371	9.36e-07	0.801	0.00485	0.225	0.000909	0.44	1.82e-14	0.0594	0.203	0.656	0.0126	0.542	0.809	0.14	0.0104	2.94e-07	3.94e-07	0.00106	0.284	0.612	1	0.0123	0.623	0.701
Fetal_Thymus_Fetal_Thymus_UW.Fetal_Thymus.ChromatinAccessibility.H-23663.DS16841.twopass.merge150.wgt10.zgt2.wig.gz	0.0705	2.57e-09	0.0344	0.0223	1.02e-06	0.184	0.022	0.00358	5.33e-07	0.0209	0.169	1.02e-08	0.172	0.207	0.00502	0.0081	1.28e-05	0.146	0.011	0.0845	0.294	0.32	4.26e-06	0.617	0.135	0.00144	0.37	0.00322	0.645	0.000235	0.0412	1.95e-09	0.135	0.00592	0.255	0.00481	0.324	0.411	0.00266	8.81e-05	1.66e-13	8.67e-07	0.0157	0.00128	0.353	1	0.00253	0.17	0.396
Fetal_Thymus_Fetal_Thymus_UW.Fetal_Thymus.ChromatinAccessibility.H-23769.DS17323.twopass.merge150.wgt10.zgt2.wig.gz	0.361	7.05e-13	0.354	0.0143	3.95e-06	0.314	0.00295	0.000418	3.32e-07	0.0191	0.446	9.19e-07	0.0455	0.314	0.0047	0.356	1.65e-06	0.0303	0.0016	0.513	0.0506	0.43	1.87e-08	0.552	0.63	0.00248	0.507	0.00967	0.141	1.14e-05	0.286	2.05e-11	0.0347	0.156	0.928	0.0358	0.542	0.925	0.0879	0.0118	4.82e-07	7.3e-06	0.0177	0.00527	0.587	1	0.104	0.624	0.517
Fetal_Thymus_Fetal_Thymus_UW.Fetal_Thymus.ChromatinAccessibility.H-23833.DS17474.twopass.merge150.wgt10.zgt2.wig.gz	0.0918	2.85e-11	0.362	0.034	0.000133	0.0789	0.00311	0.000167	8.59e-06	0.0315	0.102	5.19e-05	0.00285	0.465	0.00461	0.00254	0.000559	0.0694	0.00176	0.052	0.0718	0.423	9.74e-06	0.196	0.0753	0.012	0.52	0.00296	0.0308	8.44e-05	0.173	7.23e-13	0.322	0.0482	0.474	0.000145	0.0476	0.712	0.00662	0.017	1.46e-14	3.1e-06	0.0844	0.0323	0.533	1	0.015	0.568	0.553
Fetal_Thymus_Fetal_Thymus_UW.Fetal_Thymus.ChromatinAccessibility.H-23964.DS17875.twopass.merge150.wgt10.zgt2.wig.gz	0.192	3.92e-11	0.0313	0.00203	3.85e-06	0.675	0.0783	0.0176	5.12e-07	0.101	0.34	1.56e-07	0.0149	0.142	0.0588	0.0333	5.83e-07	0.0116	0.0016	0.18	0.0347	1	3.2e-06	0.684	0.888	0.00409	0.297	0.0134	0.00234	0.00698	0.128	1.25e-12	0.283	0.0738	0.474	0.0476	0.000168	0.798	0.0585	0.0207	1.07e-11	8.94e-08	0.372	0.00734	0.792	1	0.261	0.175	0.571
Fetal_Thymus_Fetal_Thymus_UW.Fetal_Thymus.ChromatinAccessibility.H-23964.DS17876.twopass.merge150.wgt10.zgt2.wig.gz	0.0802	1.37e-12	0.0134	0.00409	1.66e-05	0.0943	0.00274	0.000411	6.15e-09	0.0209	0.201	1.45e-10	0.00449	0.209	0.00684	0.0157	2.2e-07	0.0296	0.00163	0.103	0.00659	1	3.43e-10	0.273	0.00442	3.65e-06	0.534	0.00227	0.00744	0.000787	0.315	1.93e-14	0.0916	0.0579	0.453	0.0118	0.046	0.634	0.00687	0.00709	8.76e-14	7.38e-07	0.072	0.0161	0.257	0.812	0.00519	0.338	0.445
Fetal_Thymus_Fetal_Thymus_UW.Fetal_Thymus.ChromatinAccessibility.H-24078.DS18382.twopass.merge150.wgt10.zgt2.wig.gz	0.272	3.21e-13	0.0358	0.00508	1.75e-08	0.107	0.009	0.0106	9.44e-08	0.0113	0.0875	6.96e-07	0.000225	0.245	0.00358	0.000171	6.95e-07	0.0107	0.00441	0.334	0.0158	1	3.8e-07	0.404	0.00342	2.23e-07	0.296	0.00207	0.282	8.1e-06	0.0376	2.04e-13	0.112	2.46e-05	0.445	0.00481	0.46	0.641	2.28e-06	4.19e-05	3.01e-21	7.04e-10	0.127	0.000564	0.409	0.126	0.00354	0.0611	0.634
Fetal_Thymus_Fetal_Thymus_UW.Fetal_Thymus.ChromatinAccessibility.H-24259.DS19287.twopass.merge150.wgt10.zgt2.wig.gz	0.00375	3.55e-10	0.0158	0.0168	0.0381	0.691	0.0054	0.0463	0.00301	0.0472	0.0875	0.00106	0.566	0.98	1.57e-05	1.47e-05	0.0184	0.032	0.471	0.00467	0.139	0.487	0.0188	0.286	0.185	0.765	0.355	0.00319	1	0.0396	0.0158	0.000945	0.00688	1.06e-06	0.000691	0.132	0.728	0.593	0.165	0.00724	5.31e-28	0.238	0.336	0.0148	0.38	0.783	1.35e-10	0.0563	0.555
Fetal_Thymus_Fetal_Thymus_UW.Fetal_Thymus.ChromatinAccessibility.H-24401.DS20335.twopass.merge150.wgt10.zgt2.wig.gz	0.534	2.14e-14	0.274	0.00435	4.21e-06	0.148	0.0126	0.00316	1.33e-08	0.0395	0.361	2.6e-10	0.0238	0.273	0.00397	0.114	2.89e-05	0.032	0.00163	0.673	0.0594	1	2.3e-08	0.382	0.387	0.000122	0.573	0.0029	0.539	0.00421	0.169	8.31e-15	0.139	0.00473	0.168	0.0029	0.23	0.732	0.0905	0.00305	9.84e-12	1.08e-07	0.072	0.00831	0.361	1	0.0696	0.528	0.456
Fetal_Thymus_Fetal_Thymus_UW.Fetal_Thymus.ChromatinAccessibility.H-24409.DS20341.twopass.merge150.wgt10.zgt2.wig.gz	0.106	2.53e-13	0.27	0.00685	1e-05	0.194	0.0153	0.000311	2.16e-10	0.00647	0.111	2.06e-09	0.066	0.158	0.00793	0.00438	3.53e-07	0.028	0.000455	0.119	0.0829	1	7.48e-10	0.409	0.681	2.23e-07	0.39	0.00795	0.551	0.000363	0.307	1.03e-12	0.062	0.0553	0.146	0.00115	0.23	0.411	0.0373	0.000638	2.63e-15	5.39e-09	0.0514	0.059	0.425	1	0.0123	0.308	0.199
Fibroblasts_Fetal_Skin_Abdomen_Fibroblast_UW.Fibroblasts_Fetal_Skin_Abdomen.ChromatinAccessibility.H-24259.DS19558.twopass.merge150.wgt10.zgt2.wig.gz	0.000299	2.27e-05	0.3	0.241	0.0394	0.673	0.0104	0.000418	0.0203	0.0395	0.0675	0.000708	0.352	0.767	0.00556	1.37e-06	0.0125	0.296	0.419	0.000115	0.422	0.171	0.56	0.286	0.0468	0.589	0.491	0.00014	1	0.119	0.0115	0.000114	0.117	0.00028	0.000185	0.546	0.713	0.897	0.119	0.292	5.95e-18	0.0797	0.27	0.0288	0.529	1	1.52e-07	0.481	0.916
Fibroblasts_Fetal_Skin_Abdomen_Fibroblast_UW.Fibroblasts_Fetal_Skin_Abdomen.ChromatinAccessibility.H-24259.DS19561.twopass.merge150.wgt10.zgt2.wig.gz	0.000307	8.26e-09	0.00302	0.0377	0.0315	0.656	0.183	1.44e-05	0.015	0.101	0.143	0.000206	0.345	0.523	0.000648	0.000278	0.00382	0.108	0.492	0.000245	0.184	0.0718	0.179	0.763	0.156	0.657	0.529	0.00165	1	0.247	0.0679	0.000333	0.0153	0.000212	0.00094	0.718	1	0.974	0.313	0.219	8.15e-18	0.0361	0.384	0.0626	0.529	1	2.58e-07	0.295	0.852
Fibroblasts_Fetal_Skin_Back_Fibroblast_UW.Fibroblasts_Fetal_Skin_Back.ChromatinAccessibility.H-24218.DS19233.twopass.merge150.wgt10.zgt2.wig.gz	0.0192	4.66e-07	0.0142	0.0808	0.0877	0.691	0.00979	4.9e-05	0.0141	0.079	0.0286	0.00464	0.566	0.928	0.00466	2.58e-06	0.00709	0.215	0.488	0.0136	0.477	0.163	0.0434	0.173	0.194	0.504	0.285	0.0803	1	0.232	0.0207	0.00835	0.00228	1.02e-07	0.000219	0.595	1	0.571	0.119	0.0582	3.57e-19	0.0196	0.072	0.193	0.699	1	3.02e-09	0.111	0.919
Fibroblasts_Fetal_Skin_Biceps_Left_Fibroblast_UW.Fibroblasts_Fetal_Skin_Biceps_Left.ChromatinAccessibility.H-24259.DS19857.twopass.merge150.wgt10.zgt2.wig.gz	0.000307	2.4e-06	0.364	0.0746	0.0187	0.691	0.0419	0.00319	0.0017	0.0297	0.0675	0.000172	0.476	0.485	0.00226	1.16e-06	0.00143	0.175	0.417	0.000119	0.4	0.194	0.255	0.274	0.396	0.426	0.76	0.000621	1	0.273	0.118	0.000693	0.0569	0.00119	0.000276	0.831	0.694	0.966	0.0875	0.202	2.07e-14	0.103	0.207	0.0457	0.647	1	2.45e-09	0.217	0.71
Fibroblasts_Fetal_Skin_Biceps_Left_Fibroblast_UW.Fibroblasts_Fetal_Skin_Biceps_Left.ChromatinAccessibility.H-24259.DS19867.twopass.merge150.wgt10.zgt2.wig.gz	0.000307	8.41e-08	0.34	0.0109	0.0187	0.505	0.0236	0.00635	0.00159	0.081	0.0677	0.000776	0.333	0.485	0.000407	5.11e-06	0.000483	0.0378	0.551	0.000265	0.0751	0.179	0.25	0.398	0.283	0.604	0.886	0.0132	1	0.178	0.106	3.85e-05	0.0591	1.19e-05	0.000147	0.655	0.693	0.794	0.316	0.161	4.69e-16	0.0498	0.0531	0.0161	0.664	1	3.42e-11	0.461	0.746
Fibroblasts_Fetal_Skin_Biceps_Right_Fibroblast_UW.Fibroblasts_Fetal_Skin_Biceps_Right.ChromatinAccessibility.H-24259.DS19745.twopass.merge150.wgt10.zgt2.wig.gz	0.00128	1.22e-06	0.00302	0.0461	0.00587	0.691	0.00792	0.000311	0.00396	0.192	0.0905	0.00471	0.397	0.719	0.000206	3.17e-05	0.00391	0.13	0.649	0.000985	0.326	0.173	0.0861	0.469	0.101	0.365	0.275	0.00228	1	0.248	0.0388	0.00525	0.00835	8.82e-07	0.00257	0.444	1	0.88	0.233	0.347	2.73e-18	0.0564	0.264	0.0837	0.536	1	7.91e-09	0.187	0.883
Fibroblasts_Fetal_Skin_Biceps_Right_Fibroblast_UW.Fibroblasts_Fetal_Skin_Biceps_Right.ChromatinAccessibility.H-24259.DS19761.twopass.merge150.wgt10.zgt2.wig.gz	0.00114	9.13e-10	0.0729	0.031	0.0129	0.704	0.0444	0.0013	0.00273	0.234	0.0541	0.00312	0.47	0.501	0.015	5.11e-06	0.000988	0.0897	0.581	0.000388	0.228	0.174	0.152	0.28	0.455	0.383	0.508	0.00106	1	0.0834	0.0563	0.000207	0.185	0.000275	0.00109	0.666	1	0.918	0.0605	0.18	3.9e-18	0.0799	0.224	0.0196	0.848	1	2.22e-09	0.118	0.919
Fibroblasts_Fetal_Skin_Quadriceps_Left_Fibroblast_UW.Fibroblasts_Fetal_Skin_Quadriceps_Left.ChromatinAccessibility.H-24259.DS20046.twopass.merge150.wgt10.zgt2.wig.gz	0.000722	9.75e-08	0.00483	0.136	0.073	0.661	0.0538	0.000289	0.0054	0.0999	0.156	0.00033	0.53	0.529	0.00902	2.32e-05	0.00111	0.271	0.498	0.00073	0.52	0.224	0.0581	0.365	0.665	0.693	0.463	0.00256	1	0.263	0.165	0.000113	0.2	0.000104	0.000612	0.623	0.713	0.947	0.127	0.304	1.84e-16	0.0381	0.0844	0.0791	0.572	1	3.2e-08	0.228	0.667
Fibroblasts_Fetal_Skin_Quadriceps_Left_Fibroblast_UW.Fibroblasts_Fetal_Skin_Quadriceps_Left.ChromatinAccessibility.H-24259.DS20056.twopass.merge150.wgt10.zgt2.wig.gz	0.000307	3.24e-08	0.0279	0.0265	0.0115	0.75	0.0607	0.00141	0.00301	0.108	0.101	0.000372	0.4	0.532	0.00846	8.14e-06	0.00127	0.0753	0.504	0.000139	0.195	0.23	0.291	0.451	0.68	0.549	0.825	0.00268	1	0.27	0.113	0.000307	0.00477	0.000551	0.00259	0.637	0.493	0.752	0.264	0.205	1.78e-13	0.0818	0.18	0.0323	0.642	1	1.69e-08	0.221	0.808
Fibroblasts_Fetal_Skin_Quadriceps_Right_Fibroblast_UW.Fibroblasts_Fetal_Skin_Quadriceps_Right.ChromatinAccessibility.H-24259.DS19943.twopass.merge150.wgt10.zgt2.wig.gz	0.000307	6.61e-09	0.00302	0.0778	0.0945	0.698	0.145	0.000338	0.00388	0.0815	0.185	0.00104	0.459	0.485	0.0395	3.76e-05	0.000623	0.181	0.314	6.77e-05	0.404	0.174	0.12	0.315	0.205	0.691	0.5	4.17e-05	1	0.184	0.0968	4.54e-05	0.0419	9.19e-05	0.00303	0.645	0.694	0.845	0.0615	0.0852	1.25e-17	0.0531	0.138	0.0156	0.587	1	2.96e-07	0.151	0.702
Fibroblasts_Fetal_Skin_Quadriceps_Right_Fibroblast_UW.Fibroblasts_Fetal_Skin_Quadriceps_Right.ChromatinAccessibility.H-24259.DS19948.twopass.merge150.wgt10.zgt2.wig.gz	0.000137	1.2e-08	0.0032	0.145	0.0246	0.673	0.0665	0.000167	0.0365	0.271	0.164	0.0155	0.267	0.523	0.00117	2.48e-06	0.0199	0.205	0.521	5.09e-05	0.418	0.179	0.167	0.286	0.367	0.637	0.76	0.000124	1	0.282	0.0382	0.000342	0.0054	0.000117	0.00153	0.577	0.715	0.809	0.083	0.0686	1.52e-17	0.0196	0.121	0.0113	0.606	1	5.34e-09	0.319	0.723
Fibroblasts_Fetal_Skin_Scalp_Fibroblast_UW.Fibroblasts_Fetal_Skin_Scalp.ChromatinAccessibility.H-24259.DS19444.twopass.merge150.wgt10.zgt2.wig.gz	0.00884	8.16e-09	0.306	0.0912	0.0145	0.691	0.0762	0.000776	0.000581	0.189	0.0286	0.00216	0.738	0.717	0.00435	6.26e-08	0.000172	0.141	0.492	0.00268	0.233	0.157	0.0466	0.365	0.137	0.691	0.68	0.000995	1	0.379	0.0617	0.00185	0.0121	3.05e-07	0.00111	0.565	1	0.732	0.451	0.312	1.22e-18	0.0761	0.104	0.0117	0.875	1	1.14e-08	0.0666	0.801
Fibroblasts_Fetal_Skin_Scalp_Fibroblast_UW.Fibroblasts_Fetal_Skin_Scalp.ChromatinAccessibility.H-24259.DS19449.twopass.merge150.wgt10.zgt2.wig.gz	0.0101	6.26e-07	0.328	0.0514	0.0592	0.465	0.0143	0.000424	0.0163	0.565	0.0909	0.0052	0.566	0.719	0.00559	1.61e-06	0.00406	0.146	0.653	0.003	0.247	0.0655	0.138	0.256	0.22	0.54	0.68	0.00242	1	0.387	0.0412	0.000975	0.00215	1.69e-06	0.00137	0.59	0.693	0.811	0.107	0.103	3.61e-16	0.0885	0.276	0.0841	0.917	1	1.33e-08	0.179	0.883
Fibroblasts_Fetal_Skin_Upper_Back_Fibroblast_UW.Fibroblasts_Fetal_Skin_Upper_Back.ChromatinAccessibility.H-24259.DS19696.twopass.merge150.wgt10.zgt2.wig.gz	0.00023	3.01e-09	0.0599	0.0246	0.0184	0.691	0.387	0.000311	0.00173	0.0897	0.183	0.000372	0.777	0.745	0.00613	2.81e-05	0.000194	0.0759	0.567	7.54e-05	0.134	0.0655	0.177	0.409	0.515	0.606	0.876	0.00142	1	0.19	0.0851	0.00195	0.104	0.000273	0.000762	0.487	0.693	0.918	0.11	0.14	2.35e-15	0.157	0.129	0.236	0.941	1	1.04e-08	0.649	0.984
Fibroblasts_Fetal_Skin_Upper_Back_Fibroblast_UW.Fibroblasts_Fetal_Skin_Upper_Back.ChromatinAccessibility.H-24259.DS19706.twopass.merge150.wgt10.zgt2.wig.gz	0.000307	5.77e-08	0.074	0.0259	0.0224	0.656	0.0861	0.000118	0.000474	0.105	0.101	0.000128	0.825	0.526	0.00505	9.1e-05	0.000134	0.0283	0.37	0.000139	0.0829	0.194	0.0229	0.382	0.355	0.203	0.217	0.0002	1	0.0611	0.0723	0.000611	0.0296	6.49e-05	0.000821	0.575	0.713	0.816	0.323	0.366	3.5e-16	0.0753	0.258	0.0125	0.848	1	1.69e-07	0.0993	0.822
Penis_Foreskin_Fibroblast_Fibroblast_UW.Penis_Foreskin_Fibroblast_Primary_Cells.ChromatinAccessibility.skin01.DS18224.twopass.merge150.wgt10.zgt2.wig.gz	0.00391	3.17e-11	0.00302	0.157	0.000758	0.635	0.0167	0.000431	0.0017	0.0395	0.207	0.00069	0.395	0.767	0.00358	2.34e-07	0.000988	0.282	0.668	0.00161	0.273	0.113	0.0176	0.196	0.13	0.193	0.876	0.00115	1	0.142	0.118	0.000114	0.00476	1.15e-07	0.000778	0.311	0.373	0.864	0.03	0.00692	9.93e-21	0.0174	0.0737	0.0907	0.438	0.222	2.42e-09	0.306	0.795
Penis_Foreskin_Fibroblast_Fibroblast_UW.Penis_Foreskin_Fibroblast_Primary_Cells.ChromatinAccessibility.skin01.DS18229.twopass.merge150.wgt10.zgt2.wig.gz	0.00075	3.95e-10	0.11	0.0462	0.0129	0.648	0.0161	0.000311	0.0159	0.0795	0.285	0.00185	0.217	0.717	0.00142	8.47e-09	0.017	0.177	0.676	0.000245	0.317	0.195	0.0491	0.408	0.196	0.589	0.459	0.000427	1	0.195	0.0679	0.000131	0.0054	6.6e-07	0.00255	0.423	0.34	0.88	0.0307	0.0466	4.57e-25	0.0726	0.0956	0.0449	0.529	0.467	1.09e-11	0.507	0.564
Penis_Foreskin_Fibroblast_Fibroblast_UW.Penis_Foreskin_Fibroblast_Primary_Cells.ChromatinAccessibility.skin02.DS18252.twopass.merge150.wgt10.zgt2.wig.gz	0.00126	1.25e-11	0.0576	0.0614	0.00543	0.599	0.00436	5.69e-05	0.022	0.0395	0.119	0.00943	0.238	0.767	0.00557	6.71e-07	0.00469	0.149	0.427	0.000645	0.325	0.0655	0.0577	0.451	0.399	0.65	0.68	0.00296	1	0.32	0.0199	0.00109	0.166	2.62e-05	0.0017	0.546	1	0.816	0.0508	0.134	4.57e-19	0.0371	0.133	0.167	0.753	0.771	2.45e-09	0.101	0.733
Penis_Foreskin_Fibroblast_Fibroblast_UW.Penis_Foreskin_Fibroblast_Primary_Cells.ChromatinAccessibility.skin02.DS18256.twopass.merge150.wgt10.zgt2.wig.gz	0.00145	7.1e-12	0.0555	0.0141	0.0121	0.691	0.00338	0.000167	0.0156	0.0395	0.13	0.00267	0.384	0.772	8.47e-05	4.38e-07	0.0055	0.0303	0.581	0.000781	0.124	0.0304	0.0668	0.617	0.0871	0.606	0.705	0.00224	1	0.164	0.0456	0.000124	0.0116	1.74e-05	0.00228	0.3	0.499	0.694	0.0546	0.08	7.98e-21	0.0484	0.143	0.0755	0.529	0.771	7.23e-08	0.253	0.919
iPS_DF_4.7_IPS_cell_UW.iPS_DF_4.7.ChromatinAccessibility.DS15169.twopass.merge150.wgt10.zgt2.wig.gz	0.018	0.00231	0.19	0.065	0.231	0.599	0.151	0.00665	0.0175	0.0173	0.269	0.0272	0.311	0.767	0.0413	2.76e-05	0.138	0.103	0.423	0.00814	0.0451	0.341	0.152	0.714	0.324	0.609	0.0327	0.000762	1	0.308	0.00495	2.64e-05	0.0183	0.00273	0.428	0.302	0.713	0.263	0.133	0.0248	7.77e-16	0.0348	0.596	0.153	0.29	0.771	0.00158	0.164	0.383
iPS_DF_6.9_IPS_cell_UW.iPS_DF_6.9.ChromatinAccessibility.DS15164.twopass.merge150.wgt10.zgt2.wig.gz	0.106	2.55e-05	0.183	0.26	0.0145	0.505	0.00805	0.03	0.00173	0.0241	0.566	0.0154	0.263	0.818	0.00142	6.33e-06	0.0127	0.221	0.433	0.0306	0.172	0.335	0.0163	0.41	0.119	0.426	0.0131	0.00107	1	0.0659	0.0115	4.62e-06	0.00477	2.24e-05	0.477	0.538	0.542	0.084	0.0187	0.00018	2.13e-16	0.0168	0.57	0.0245	0.473	0.158	0.000216	0.0275	0.0487
iPS_DF_19.7_IPS_cell_UW.iPS_DF_19.7.ChromatinAccessibility.DS15148.twopass.merge150.wgt10.zgt2.wig.gz	0.0314	0.000217	0.103	0.0239	0.0485	0.752	0.112	0.313	0.0605	0.0404	0.215	0.0102	0.0492	0.93	0.0109	0.00506	0.243	0.108	0.486	0.0149	0.0868	0.0655	0.11	0.674	0.16	0.799	0.0125	0.00454	1	0.161	0.00041	0.000273	0.000137	0.000506	0.445	0.218	0.694	0.258	0.0161	0.16	8.29e-15	0.019	0.538	0.0138	0.224	0.295	0.00034	0.174	0.349
iPS_DF_19.11_IPS_cell_UW.iPS_DF_19.11.ChromatinAccessibility.DS15153.twopass.merge150.wgt10.zgt2.wig.gz	0.0403	1.14e-05	0.0974	0.00621	0.0774	0.698	0.028	0.0263	0.0324	0.0221	0.0554	0.00249	0.313	0.523	0.000171	1.72e-05	0.0547	0.0242	0.37	0.0194	0.0193	0.239	0.0688	0.457	0.0407	0.13	0.00126	0.0002	1	0.00436	1.73e-05	9.87e-06	0.00721	0.000118	0.197	0.142	0.23	0.0545	0.00662	0.00114	8.93e-16	0.0238	0.48	0.00427	0.0769	0.388	5.43e-05	0.305	0.426
IMR90_Lung_UW.IMR90.ChromatinAccessibility.DS11759.twopass.merge150.wgt10.zgt2.wig.gz	0.014	1.58e-06	1	0.0732	0.0187	0.698	0.102	3.65e-05	0.0147	0.234	0.645	0.00209	0.31	0.746	0.00479	5.45e-05	0.0148	0.183	0.314	0.0128	0.293	0.157	0.0169	0.396	0.424	0.505	0.876	0.0259	1	0.0668	0.138	0.0422	0.000988	0.00181	0.00247	0.482	0.694	0.967	0.117	0.906	1.72e-12	0.00914	0.214	0.434	0.912	1	0.0093	0.151	0.957
IMR90_Lung_UW.IMR90.ChromatinAccessibility.DS11764.twopass.merge150.wgt10.zgt2.wig.gz	0.00347	2.26e-06	0.288	0.0312	0.108	0.728	0.00592	0.000737	0.0204	0.0916	0.31	0.00323	0.188	1	0.00203	6.6e-07	0.0192	0.101	0.482	0.00723	0.255	0.147	0.0398	0.409	0.36	0.191	0.68	0.0212	1	0.357	0.0686	0.031	0.0153	0.000132	0.000277	0.237	0.701	0.846	0.114	0.554	1.77e-13	0.0239	0.0946	0.468	0.695	0.303	0.00015	0.531	0.883
IMR90_Lung_UW.IMR90.ChromatinAccessibility.DS13219.twopass.merge150.wgt10.zgt2.wig.gz	0.000307	4e-08	0.00302	0.0312	0.0243	0.789	0.0258	2.15e-05	3.51e-05	0.119	0.221	0.000188	0.291	0.984	0.0183	1.64e-07	0.000101	0.052	0.598	0.000388	0.141	0.0657	0.0349	0.274	0.481	0.149	0.526	0.00202	1	0.11	0.0686	0.0205	0.0116	3.62e-05	0.00683	0.254	0.721	0.933	0.082	0.355	6.56e-20	0.0654	0.151	0.0441	0.668	0.771	0.0002	0.128	0.919
IMR90_Lung_UW.IMR90.ChromatinAccessibility.DS13229.twopass.merge150.wgt10.zgt2.wig.gz	0.0107	1.48e-09	0.056	0.0747	0.0144	0.741	0.091	6.49e-06	0.000307	0.222	0.361	0.000188	0.113	1	0.0112	1.76e-05	0.000236	0.113	0.174	0.00441	0.393	0.0304	0.189	0.28	0.0496	0.504	0.448	0.0167	1	0.0594	0.0101	0.00539	0.0299	0.000144	0.000385	0.5	0.713	0.768	0.115	0.366	2.71e-11	0.0962	0.162	0.276	0.825	0.735	0.000193	0.404	0.808
Penis_Foreskin_Keratinocyte_Skin_UW.Penis_Foreskin_Keratinocyte_Primary_Cells.ChromatinAccessibility.skin01.DS18692.twopass.merge150.wgt10.zgt2.wig.gz	0.0883	7.64e-07	0.133	0.042	0.131	0.752	0.0932	0.00564	0.0141	0.163	0.346	0.000225	0.0094	0.984	0.1	0.0876	0.0425	0.122	0.283	0.149	0.34	0.223	0.0977	0.608	0.265	0.367	0.218	0.0165	1	0.408	0.208	0.00798	0.0223	1.57e-05	0.614	0.398	0.542	0.477	0.0161	0.0186	1.17e-08	5.3e-06	0.331	0.177	0.747	0.8	0.0277	0.461	0.919
Penis_Foreskin_Keratinocyte_Skin_UW.Penis_Foreskin_Keratinocyte_Primary_Cells.ChromatinAccessibility.skin01.DS18695.twopass.merge150.wgt10.zgt2.wig.gz	0.0122	8.14e-05	0.0232	0.504	0.152	0.809	0.177	0.00152	0.0271	0.315	0.158	0.000776	0.12	0.984	0.0198	0.04	0.0096	0.714	0.295	0.0214	0.906	0.195	0.282	0.68	0.532	0.0748	0.283	0.00789	1	0.42	0.245	0.00188	0.00642	0.000345	0.163	0.538	1	0.62	0.0458	0.189	4.13e-07	2.33e-06	0.16	0.122	0.902	0.328	0.0254	0.232	0.963
Penis_Foreskin_Keratinocyte_Skin_UW.Penis_Foreskin_Keratinocyte_Primary_Cells.ChromatinAccessibility.skin02.DS18714.twopass.merge150.wgt10.zgt2.wig.gz	0.0149	1.19e-08	0.0201	0.0287	0.0303	0.928	0.044	0.00484	0.000782	0.136	0.282	6.54e-05	0.0689	0.984	0.0756	0.0301	0.00369	0.122	0.316	0.0129	0.19	0.0846	0.119	0.414	0.496	0.341	0.283	0.00233	1	0.327	0.259	0.000131	0.0317	0.000234	0.473	0.443	0.728	0.585	0.117	0.213	7.32e-08	0.0005	0.121	0.0656	0.791	0.352	0.00244	0.361	0.984
Penis_Foreskin_Keratinocyte_Skin_UW.Penis_Foreskin_Keratinocyte_Primary_Cells.ChromatinAccessibility.skin02.DS18718.twopass.merge150.wgt10.zgt2.wig.gz	0.00277	2.36e-07	0.023	0.0288	0.0295	0.822	0.0591	0.0146	0.00389	0.328	0.284	0.000695	0.146	1	0.014	0.0132	0.00381	0.0814	0.32	0.00641	0.26	0.0824	0.117	0.848	0.589	0.0302	0.458	0.00372	1	0.329	0.165	0.00643	0.0226	0.0021	0.474	0.319	1	0.467	0.113	0.0659	7.15e-07	7.96e-07	0.381	0.143	0.825	0.783	0.00343	0.135	0.984
Penis_Foreskin_Melanocyte_Skin_UW.Penis_Foreskin_Melanocyte_Primary_Cells.ChromatinAccessibility.skin01.DS18590.twopass.merge150.wgt10.zgt2.wig.gz	0.0162	3.37e-07	0.0933	0.0428	0.0219	0.691	0.0911	0.000803	0.0901	0.0191	0.13	0.0135	0.0393	0.98	0.00154	0.0195	0.136	0.044	0.836	0.0165	0.184	0.174	0.0558	0.469	0.0961	0.68	0.765	0.00402	1	0.495	0.216	6.71e-05	0.0197	7.58e-05	0.453	0.19	0.52	0.732	0.0144	0.247	1.77e-19	2.18e-05	0.223	0.573	0.747	0.777	7.24e-05	0.0202	0.493
Penis_Foreskin_Melanocyte_Skin_UW.Penis_Foreskin_Melanocyte_Primary_Cells.ChromatinAccessibility.skin01.DS18601.twopass.merge150.wgt10.zgt2.wig.gz	0.018	1.26e-06	0.202	0.138	0.0278	0.505	0.00583	3.99e-05	0.123	0.0148	0.0293	0.0162	0.142	0.885	0.00489	0.00411	0.121	0.183	0.405	0.0096	0.351	0.291	0.0454	0.327	0.0861	0.363	0.801	0.007	1	0.438	0.481	0.0149	0.00792	3.05e-05	0.249	0.235	0.542	0.789	0.155	0.0476	3.48e-13	0.00172	0.518	0.00804	0.572	0.46	0.000191	0.0264	0.492
[truncated: 143 more columns]
