# Supplementary material for: Integrative analysis of 3604 GWAS reveals multiple novel cell type-specific regulatory associations
Source: Genome Biol. 2022 Jan 7;23:13. doi: 10.1186/s13059-021-02560-3 (PMC8742386; doi:10.1186/s13059-021-02560-3)
Supplement: Supplementary file 7 — Additional file 7: Table S6. Consolidated Epigenomics Roadmap H3K4me3 FORGE2 GWAS catalogue analysis results (q-values). [file 13059_2021_2560_MOESM7_ESM.xlsx]

## Sheet: sig.sites.H3K4me3
Table S6: Consolidated Epigenomics Roadmap H3K4me3 FORGE2 GWAS catalog analysis results (q-values):
Cell_Tissue_File	Educational_attainment_years_of_education	Reaction_time	Squamous_cell_lung_carcinoma	Atrial_fibrillation	Lipoproteina_levels_adjusted_for_apolipoproteina_isoforms	Body_mass_index	Lipoprotein_phospholipase_A2_activity_in_cardiovascular_disease	White_blood_cell_count	Albumin-globulin_ratio	Metabolite_levels_lipoprotein_measures	Diastolic_blood_pressure	Albuminuria	Cholesterol,_total	Alcohol_consumption_drinks_per_week	Corneal_endothelial_cell_density	Neutrophil_percentage_of_granulocytes	Red_blood_cell_count	Chronic_inflammatory_diseases_ankylosing_spondylitis,_Crohns_disease,_psoriasis,_primary_sclerosing_cholangitis,_ulcerative_colitis_pleiotropy	Post_bronchodilator_FEV1_in_COPD	Neutrophil_percentage_of_white_cells	HDL_cholesterol_levels	Total_body_bone_mineral_density	N-glycan_levels	Serum_uric_acid_levels	Mean_arterial_pressure	3-hydroxy-1-methylpropylmercapturic_acid_levels_in_smokers	Autism_spectrum_disorder_or_schizophrenia	Chronic_lymphocytic_leukemia	Facial_morphology_factor_14,_intercanthal_width	Coronary_artery_disease	Low_density_lipoprotein_cholesterol_levels	Total_cholesterol_levels	Hypertension	White_blood_cell_count_basophil	General_risk_tolerance_MTAG	3-hydroxypropylmercapturic_acid_levels_in_smokers	HDL_cholesterol_levels_x_alcohol_consumption_drinkers_vs_non-drinkers_interaction_2df	Mitochondrial_DNA_copy_number_white_blood_cells	Interleukin-9_levels	Reticulocyte_count	Mean_corpuscular_hemoglobin	Sulfasalazine-induced_agranulocytosis	Primary_biliary_cholangitis	Mitral_valve_prolapse	Diastolic_blood_pressure_x_alcohol_consumption_light_vs_heavy_interaction_2df_test	Sum_basophil_neutrophil_counts	Non-melanoma_skin_cancer	Facial_morphology_factor_22	Intracranial_aneurysm
E029_Primary_monocytes_from_peripheral_blood_Blood_E029-H3K4me3.broadPeak.gz	0.000131	0.18	0.216	0.0539	1	0.013	0.35	5.79e-21	0.143	0.55	2.35e-05	1	0.485	0.0435	0.455	1.59e-11	5.22e-12	0.000643	0.277	0.000123	0.591	0.0929	0.53	0.91	0.0309	0.0111	0.0205	5.51e-05	0.333	0.000721	1	0.356	0.191	0.0133	0.406	0.227	0.5	1	0.484	0.000805	2.32e-21	0.309	0.677	1	0.00902	0.000275	0.0462	0.328	1
E032_Primary_B_cells_from_peripheral_blood_Blood_E032-H3K4me3.broadPeak.gz	0.318	0.163	0.174	0.37	1	0.579	0.678	2.59e-06	0.0094	0.824	0.503	1	0.757	0.388	0.801	7.68e-05	0.000175	0.000129	0.951	0.119	0.538	0.371	0.0631	0.922	0.713	0.823	0.000233	5.51e-05	0.512	0.543	1	0.489	0.795	0.584	1	0.788	0.218	1	0.183	0.0441	4.11e-09	0.7	0.166	1	0.0108	0.0641	0.0365	0.146	0.881
E033_Primary_T_cells_from_cord_blood_Blood_E033-H3K4me3.broadPeak.gz	0.00142	0.367	0.269	0.181	1	0.013	0.67	6.53e-12	0.166	0.42	0.00102	1	0.558	0.388	0.298	4.77e-08	3.55e-09	0.0052	0.114	0.00435	0.538	0.00569	0.0631	0.99	0.0293	0.502	0.633	0.000618	0.37	0.152	1	0.965	0.451	0.0498	0.804	0.522	0.483	1	0.564	0.0158	6.29e-17	0.309	0.153	1	0.0303	0.258	0.0311	1	1
E034_Primary_T_cells_from_peripheral_blood_Blood_E034-H3K4me3.broadPeak.gz	0.534	0.18	0.269	0.0746	1	0.091	0.66	2.59e-11	0.327	0.914	0.000936	1	0.801	0.79	0.759	4.77e-08	3.97e-09	2.14e-05	0.195	0.000565	0.824	0.218	0.186	0.855	0.0328	0.0398	0.208	0.000502	0.669	0.0188	1	0.458	0.825	0.047	1	0.242	0.491	1	0.509	0.0573	1.17e-14	0.269	0.000539	1	0.0815	0.0202	0.0146	0.117	1
E046_Primary_Natural_Killer_cells_from_peripheral__Blood_E046-H3K4me3.broadPeak.gz	1.72e-05	0.367	0.477	0.33	1	0.00099	0.911	8.53e-05	0.0846	0.971	0.0108	1	0.925	0.167	0.801	1.47e-05	0.000231	0.0093	0.951	0.272	0.538	0.218	0.421	0.91	0.0594	1	0.0389	0.00112	0.721	0.227	1	0.965	0.165	0.0827	0.0034	0.999	0.745	1	1	0.0064	4.08e-07	0.962	0.166	1	0.0613	0.347	0.784	0.792	1
E050_Primary_hematopoietic_stem_cells_G-CSF-mobili_Blood_E050-H3K4me3.broadPeak.gz	0.31	0.0993	0.118	0.452	1	0.745	0.194	5.9e-11	0.0833	0.398	0.0196	1	0.202	0.187	0.361	1.54e-05	7.08e-12	0.002	0.022	0.000721	0.538	0.371	0.397	0.957	0.0597	0.293	0.0632	0.000502	0.642	0.0433	1	0.685	0.493	0.00464	0.956	0.168	0.231	1	0.932	4.38e-05	1.91e-19	0.205	0.166	1	0.212	0.00746	0.0592	0.363	0.299
E051_Primary_hematopoietic_stem_cells_G-CSF-mobili_Blood_E051-H3K4me3.broadPeak.gz	0.0172	0.18	0.00462	0.231	1	0.0248	0.0889	1.44e-23	0.166	0.491	0.000273	1	0.113	0.0435	0.422	4.94e-13	8.42e-28	1.17e-06	0.246	0.000711	0.207	0.218	0.175	0.91	0.0328	0.0111	0.00213	0.00319	0.665	0.00635	1	0.154	0.325	0.00464	0.671	0.174	0.218	1	0.814	9.46e-07	4.42e-35	0.277	0.166	1	0.0502	0.000705	0.0967	0.245	0.656
E028_Breast_variant_Human_Mammary_Epithelial_Cells_Breast_E028-H3K4me3.broadPeak.gz	0.221	0.744	0.216	0.808	1	0.405	0.53	0.00141	0.622	0.824	0.000751	0.153	0.0835	0.582	0.361	0.103	0.0014	0.359	0.951	0.196	0.326	0.382	0.175	0.922	0.0275	0.886	0.594	0.1	0.489	0.0207	1	0.533	0.208	0.294	0.751	0.933	0.231	1	0.983	0.0446	2.13e-08	0.798	0.314	1	0.848	0.831	0.856	0.178	0.394
E003_H1_Cells_ES_Cell_E003-H3K4me3.broadPeak.gz	1.72e-05	0.0505	0.11	0.0352	0.462	0.000337	0.0691	0.00129	0.622	0.399	0.00106	1	0.532	0.0106	0.216	7.9e-05	1.41e-07	0.0981	0.0206	0.0514	0.667	0.00462	0.821	0.454	0.0294	0.293	0.0533	0.198	0.249	0.000411	1	0.619	0.551	0.748	0.268	0.00525	0.715	1	0.0819	0.0864	1.9e-12	0.258	0.966	1	0.0541	0.174	0.42	0.216	1
E004_H1_BMP4_Derived_Mesendoderm_Cultured_Cells_ES_Cell_E004-H3K4me3.broadPeak.gz	0.31	0.18	0.0567	0.0981	0.797	0.209	0.61	0.259	0.906	0.398	0.606	1	0.025	0.0392	0.404	0.0477	0.0198	0.958	0.0657	0.119	0.538	0.218	0.397	0.962	0.402	0.249	0.501	0.594	0.201	0.132	0.561	0.154	0.854	0.748	1	0.0342	0.381	1	0.46	0.252	5.31e-05	0.531	0.945	1	0.636	0.258	0.342	0.223	1
E005_H1_BMP4_Derived_Trophoblast_Cultured_Cells_ES_Cell_E005-H3K4me3.broadPeak.gz	1	0.868	0.216	0.0794	0.602	1	0.00902	0.00676	0.622	0.0988	0.0825	0.383	0.025	0.661	1.81e-06	0.000921	0.000107	0.00166	0.000296	7.18e-05	0.217	0.312	0.175	0.414	0.238	1.4e-08	0.533	0.753	0.0573	0.0102	0.000297	8.12e-07	0.512	0.139	1	2.32e-09	0.0787	0.104	0.0628	0.0842	4.78e-11	0.139	0.883	0.713	0.322	0.03	0.0101	0.0135	4.46e-06
E006_H1_Derived_Mesenchymal_Stem_Cells_ES_Cell_E006-H3K4me3.broadPeak.gz	1	0.868	9.6e-05	0.0483	0.445	0.643	0.0476	5.35e-05	0.28	0.0253	0.00588	0.0568	0.0249	0.844	0.0207	0.000669	3.22e-11	0.0151	0.0134	0.000123	0.238	0.218	0.186	0.0379	0.0328	5.99e-13	0.533	0.375	0.0487	6.98e-05	0.000551	2.53e-06	0.512	0.0516	1	7.96e-11	0.0265	0.15	0.00905	0.000677	2.7e-19	0.0192	0.787	0.451	0.135	0.0154	5.26e-05	0.0467	4.46e-06
E007_H1_Derived_Neuronal_Progenitor_Cultured_Cells_ES_Cell_E007-H3K4me3.broadPeak.gz	1	0.868	0.142	0.396	0.287	1	0.0404	0.0614	0.406	0.199	0.151	0.00664	0.0561	0.79	0.00466	0.0296	0.00201	0.0161	0.0657	0.057	0.335	0.312	0.603	0.91	0.238	2.7e-06	1	0.906	0.00335	0.109	0.000551	1.04e-06	0.956	0.0424	1	2.06e-06	0.295	0.0306	0.0223	0.00375	1.85e-06	0.0474	0.966	1	0.0626	0.2	0.0592	0.0312	0.183
E008_H9_Cells_ES_Cell_E008-H3K4me3.broadPeak.gz	0.534	0.0757	0.0171	0.33	1	0.745	0.0448	8.57e-05	0.622	0.191	0.000936	1	0.0037	0.0163	0.174	3.31e-06	4.84e-09	0.196	0.000342	0.379	0.824	0.218	0.86	0.0165	0.029	0.0035	0.218	0.232	0.0608	8.22e-05	8.52e-05	7.12e-05	0.215	0.803	1	1.34e-08	0.676	0.019	0.166	0.00772	7.83e-22	0.0524	0.495	1	0.0462	0.258	0.234	0.0467	0.0165
E085_Fetal_Intestine_Small_Feta_Intestine_Small_E085-H3K4me3.broadPeak.gz	0.0173	0.0258	0.192	0.0403	0.614	0.013	0.113	2.41e-05	0.413	0.394	2.5e-05	0.471	0.025	0.327	0.298	0.00113	3.37e-07	0.22	0.0381	0.00913	0.538	0.218	0.86	0.914	0.00431	0.0898	0.0874	0.0427	1	0.0127	0.661	0.154	0.0259	0.748	1	0.0342	0.745	0.573	0.564	0.0474	7.85e-13	0.305	0.153	1	0.0207	0.00351	0.138	0.674	0.857
E080_Fetal_Adrenal_Gland_Fetal_Adrenal_Gland_E080-H3K4me3.broadPeak.gz	0.0658	0.199	0.031	0.0336	0.445	0.169	0.0404	8.83e-10	0.478	0.55	3.1e-07	1	0.0646	0.582	0.298	0.00021	5.41e-07	0.002	0.196	0.112	0.251	0.00462	0.261	0.91	0.000165	0.0203	0.226	0.264	0.0608	0.00121	0.16	0.039	0.231	0.0088	0.671	0.202	0.244	1	0.615	0.0226	5.58e-15	0.168	0.935	1	0.0303	0.0078	0.814	0.15	0.397
E081_Fetal_Brain_Male_Fetal_Brain_E081-H3K4me3.broadPeak.gz	0.0279	0.105	0.185	0.177	0.78	0.547	0.293	0.0895	0.906	0.881	0.818	1	0.558	0.388	0.404	0.955	0.0924	0.566	0.638	0.617	0.824	0.487	0.821	0.99	0.402	0.791	0.927	0.594	0.665	0.261	1	0.78	0.854	0.803	0.231	0.963	0.827	1	0.484	0.252	0.0364	0.269	0.784	1	0.116	0.407	0.734	1	0.602
E082_Fetal_Brain_Female_Fetal_Brain_E082-H3K4me3.broadPeak.gz	2.44e-16	0.00141	0.00352	0.0205	1	3.58e-11	0.175	1.04e-08	0.622	0.523	4.97e-06	0.125	0.113	0.002	0.298	0.00228	7.39e-10	0.846	0.0657	0.0218	0.667	0.131	0.397	0.311	0.0131	0.365	0.217	0.0926	0.512	0.00629	0.738	0.0377	0.325	0.803	0.00655	0.503	0.5	1	0.396	0.0126	8.77e-16	0.0178	0.677	1	0.0542	0.334	0.245	0.0481	0.602
E083_Fetal_Heart_Fetal_Heart_E083-H3K4me3.broadPeak.gz	1	0.199	0.487	1.17e-07	0.445	1	0.67	0.842	0.75	0.934	0.175	0.577	0.558	0.582	0.949	0.667	0.405	0.995	0.947	0.869	0.824	0.635	0.821	0.99	0.523	0.823	1	0.594	0.489	0.157	1	0.996	0.545	0.803	1	0.963	0.926	1	0.817	0.772	0.518	0.531	0.966	1	0.135	0.578	0.42	0.87	1
E084_Fetal_Intestine_Large_Fetal_Intestine_Large_E084-H3K4me3.broadPeak.gz	0.00142	0.05	0.376	0.023	1	0.000444	0.318	4.52e-07	0.251	0.121	2.63e-09	1	0.0259	0.276	0.298	0.000794	5.79e-08	0.039	0.213	0.112	0.357	0.119	0.821	0.922	0.00691	0.718	0.244	0.0498	0.665	0.00179	0.179	0.0114	0.161	0.748	0.336	0.933	0.483	1	0.564	0.0314	6.13e-13	0.34	0.554	0.908	0.0502	0.0463	0.245	0.328	0.995
E086_Fetal_Kidney_Fetal_Kidney_E086-H3K4me3.broadPeak.gz	0.341	0.452	0.267	0.564	0.918	0.578	0.414	0.000123	0.721	0.82	8.21e-05	1	0.0646	0.375	0.488	0.0358	9.12e-08	0.186	0.179	0.343	0.637	0.0843	0.397	0.311	0.0217	0.0152	0.222	0.121	0.723	0.00179	0.741	0.234	0.118	0.662	0.671	0.439	0.827	1	0.564	0.00499	6.17e-08	0.676	0.883	1	0.056	0.275	0.937	0.684	0.857
E088_Fetal_Lung_Fetal_Lung_E088-H3K4me3.broadPeak.gz	1	0.511	0.833	0.808	0.645	0.962	0.468	0.00438	0.28	0.148	0.00597	1	0.611	0.844	0.488	0.139	0.00461	0.359	0.909	0.214	0.593	0.323	0.261	0.99	0.0309	0.68	1	0.179	0.723	0.00216	1	0.78	0.161	0.803	1	0.999	0.745	1	0.183	0.636	0.0107	0.196	0.784	1	0.179	0.578	0.784	0.639	0.919
E090_Fetal_Muscle_Leg_Fetal_Muscle_Leg_E090-H3K4me3.broadPeak.gz	4.38e-06	0.0505	0.192	0.00846	1	0.0368	0.541	6.93e-15	0.371	0.283	7.51e-07	1	0.286	0.388	0.63	1.48e-07	4.13e-11	0.112	0.114	0.0551	0.538	0.0173	0.397	0.957	0.000165	0.293	0.222	0.0251	0.629	0.000644	1	0.702	0.00979	0.0424	1	0.178	0.528	1	0.399	0.000878	8.32e-17	0.0524	0.633	1	0.0137	0.00999	0.451	0.178	0.995
E089_Fetal_Muscle_Trunk_Fetal_Muscle_Trunk_E089-H3K4me3.broadPeak.gz	0.303	0.00565	0.0139	0.000579	0.602	0.209	0.444	4.8e-06	0.143	0.155	0.000478	0.00448	0.202	0.187	0.51	0.000225	5.21e-06	0.186	0.0242	0.00713	0.91	0.00462	0.53	0.855	0.0024	0.0564	0.71	0.0555	0.0573	0.00438	0.829	0.137	0.118	0.294	1	0.0188	0.483	0.261	0.26	0.00101	7.9e-10	0.106	0.883	1	0.0132	0.0279	0.676	0.0312	0.37
E092_Fetal_Stomach_Fetal_Stomach_E092-H3K4me3.broadPeak.gz	0.000223	0.199	0.22	0.00142	1	0.0389	0.293	1.66e-11	0.355	0.399	1.39e-06	1	0.025	0.375	0.416	3.09e-06	2.69e-06	0.0311	0.0657	0.0127	0.538	0.00976	0.821	0.94	0.00122	0.68	0.71	0.375	1	0.000721	0.822	0.259	0.0181	0.156	1	0.15	0.483	1	0.814	0.152	1.19e-10	0.269	0.314	0.908	0.0316	0.00746	0.32	0.245	0.976
E093_Fetal_Thymus_Fetal_Thymus_E093-H3K4me3.broadPeak.gz	0.779	0.199	0.397	0.361	0.462	1	0.801	0.000113	0.177	0.804	0.415	1	0.199	0.187	0.298	1.58e-07	0.000175	0.00131	0.245	0.00594	0.824	0.312	0.397	0.855	0.0938	0.823	0.244	0.0427	0.193	0.0423	1	0.702	0.451	0.139	1	0.933	0.724	0.778	0.564	0.0474	6.25e-10	0.531	0.204	1	0.0541	0.0279	0.0592	0.463	1
E094_Gastric_Gastric_E094-H3K4me3.broadPeak.gz	1	0.952	0.0726	0.775	0.00683	1	0.0107	0.0169	0.906	0.635	0.0413	0.0405	0.0259	0.579	4.42e-05	0.00428	0.0159	0.00461	0.0242	0.0229	0.557	0.872	0.251	0.521	0.204	3.02e-06	0.99	0.171	0.0487	0.0423	6.55e-05	0.00233	0.404	0.662	1	8.52e-10	0.172	0.019	0.0128	0.00943	9.93e-07	0.00636	0.554	1	0.336	0.24	0.0536	0.0506	0.00198
E021_iPS_DF_6.9_Cells_IPS_cell_E021-H3K4me3.broadPeak.gz	0.731	0.163	0.269	0.684	0.645	0.766	0.0145	0.0754	0.515	0.0215	0.121	0.384	0.452	0.167	0.0454	0.0847	9.52e-07	0.307	0.0206	0.595	0.91	0.0953	0.86	0.855	0.402	0.000854	0.453	0.229	0.642	0.152	0.822	0.455	0.825	0.223	0.751	2.89e-07	0.483	0.573	0.353	0.332	4.42e-10	0.309	0.935	0.88	0.447	0.174	0.0967	0.328	0.299
E022_iPS_DF_19.11_Cells_IPS_cell_E022-H3K4me3.broadPeak.gz	0.115	0.511	0.0471	0.0404	0.918	0.136	0.0145	8.53e-05	0.888	0.00337	0.000379	1	0.0065	0.00943	0.221	1.54e-05	4.48e-15	0.00661	0.0714	0.000257	0.538	0.312	0.136	0.0181	0.0235	5.86e-07	0.71	0.12	0.0287	2.53e-06	0.000284	1.28e-05	0.545	0.0874	1	1.49e-06	0.433	0.000841	0.00905	1.21e-05	2.95e-22	0.269	0.677	0.00578	0.0101	0.347	0.0373	0.000108	6.41e-07
E017_IMR90_fetal_lung_fibroblasts_Cell_Line_Lung_E017-H3K4me3.broadPeak.gz	4.38e-06	0.0518	0.018	0.00829	1	0.000551	0.0853	1.66e-11	0.622	0.365	2.14e-07	1	0.155	0.388	0.458	0.000104	2.6e-10	0.0785	0.277	0.111	0.619	0.000418	0.6	0.454	0.0122	0.0492	0.0533	0.013	1	0.000396	1	0.133	0.223	0.748	0.231	0.13	0.433	1	1	0.00216	1.96e-18	0.309	0.495	1	0.0108	0.258	0.142	0.345	0.818
E097_Ovary_Ovary_E097-H3K4me3.broadPeak.gz	0.00742	0.412	0.477	0.0381	0.462	0.0368	0.588	0.00583	0.159	0.55	0.0428	1	0.304	0.174	0.889	0.0885	0.00231	0.311	0.179	0.603	0.824	0.123	0.875	0.791	0.376	0.502	0.303	0.12	0.648	0.635	1	0.619	0.195	0.902	0.751	0.999	0.745	0.255	1	0.243	5.31e-05	0.531	0.966	1	0.0502	0.474	0.829	0.792	0.37
E098_Pancreas_Pancreas_E098-H3K4me3.broadPeak.gz	1	0.497	0.0471	0.361	1	1	0.057	0.000301	0.355	0.0215	0.0214	0.00957	0.0113	0.503	0.000272	0.00428	0.000521	0.085	0.000961	0.00722	0.173	0.218	0.0972	0.756	0.0851	1.61e-09	0.417	0.12	0.0194	0.013	0.0177	0.0142	0.601	0.723	1	6.64e-06	0.433	0.055	0.0175	0.000414	1.68e-10	0.005	0.784	0.791	0.0322	0.0176	0.114	0.0219	0.00285
E091_Placenta_Placenta_E091-H3K4me3.broadPeak.gz	0.00437	0.412	0.0937	0.0243	0.987	0.745	0.0404	1.79e-11	0.563	0.55	5.95e-10	1	0.303	0.152	0.298	4.32e-05	2.71e-07	0.0151	0.196	0.00756	0.557	0.232	0.43	0.91	8.74e-05	0.00595	0.4	0.0352	0.227	0.000506	1	0.235	0.00979	0.21	0.231	0.143	0.483	1	0.615	0.0474	3.51e-14	0.177	0.314	0.88	0.0137	0.0219	0.42	0.506	0.85
E100_Psoas_Muscle_Psoas_Muscle_E100-H3K4me3.broadPeak.gz	0.0173	0.0804	0.0585	0.104	0.645	0.195	0.444	8.53e-05	0.563	0.824	0.000219	1	0.941	0.0479	0.801	0.000303	1.56e-05	0.622	0.163	0.196	0.57	0.382	0.86	0.962	0.0294	0.066	0.015	0.00268	0.728	0.665	1	0.996	0.551	0.156	0.271	0.883	0.641	0.573	0.414	0.237	1.99e-09	0.173	0.633	1	0.0542	0.0463	0.703	0.345	0.769
E055_Foreskin_Fibroblast_Primary_Cells_skin01_Skin_E055-H3K4me3.broadPeak.gz	0.0212	0.0757	0.0585	0.00284	0.918	0.000444	0.0145	2.86e-19	0.355	0.191	9.75e-12	0.00664	0.025	0.0435	0.12	1.21e-06	8.02e-23	0.000162	0.00533	0.00321	0.000934	0.0317	0.186	0.01	1.25e-05	3.51e-05	0.0418	0.179	0.0573	1.74e-09	5.61e-06	1.49e-14	0.17	0.109	0.956	9.98e-06	0.0221	0.573	0.15	1.61e-06	7.26e-27	0.0165	0.314	0.742	0.0375	0.0078	0.0462	0.119	0.0372
E056_Foreskin_Fibroblast_Primary_Cells_skin02_Skin_E056-H3K4me3.broadPeak.gz	0.0227	0.163	0.00306	0.000513	1	0.00099	0.0215	1.14e-17	0.622	0.111	1.87e-09	0.00742	0.0037	0.167	0.0207	7.94e-05	3.8e-30	2.14e-05	0.0134	0.00913	0.000934	0.0173	0.0101	0.00652	0.000165	1.27e-05	0.456	0.238	0.145	7e-12	5.41e-09	1.49e-14	0.118	0.168	1	9.07e-05	0.0125	0.573	0.166	6.34e-07	1.73e-32	0.0524	0.153	0.451	0.188	0.00746	0.0282	0.142	0.00491
E057_Foreskin_Keratinocyte_Primary_Cells_skin02_Skin_E057-H3K4me3.broadPeak.gz	0.000515	0.0804	0.166	0.00142	1	0.00259	0.0343	2.31e-13	0.622	0.127	3.67e-07	1	0.0108	0.187	0.51	1.4e-06	1.97e-19	0.00176	0.234	0.0514	0.217	0.00569	0.821	0.106	0.00828	0.0492	0.216	0.1	0.144	7.75e-05	0.000107	7.31e-05	0.0658	0.928	0.231	0.0003	0.226	1	0.271	0.000799	5.03e-22	0.139	0.153	0.791	0.0137	0.0747	0.0101	0.146	0.299
E059_Foreskin_Melanocyte_Primary_Cells_skin01_Skin_E059-H3K4me3.broadPeak.gz	0.0613	0.163	0.00352	0.0161	0.918	0.303	0.0284	3.9e-13	0.301	0.11	6.1e-11	0.153	0.00278	0.375	0.0277	1.54e-05	6.49e-22	2.14e-05	0.0134	0.000305	0.207	0.0843	0.00384	0.0053	0.000384	6.68e-06	0.078	0.342	0.0384	4.31e-09	3.59e-10	1.49e-14	0.0658	0.0164	1	3.32e-06	0.0076	0.0607	0.0223	2.18e-06	1.84e-31	0.0286	0.515	0.451	0.0132	0.0039	0.0101	0.00851	0.0581
E109_Small_Intestine_Small_Intestine_E109-H3K4me3.broadPeak.gz	1	0.0582	0.244	0.00142	0.756	0.837	0.118	8.53e-05	0.355	0.881	0.00225	1	0.0337	0.617	0.302	2.71e-05	0.00146	0.0549	0.355	0.141	0.217	0.218	0.175	0.311	0.00996	0.0564	0.951	0.359	0.623	0.000205	0.673	0.0403	0.129	0.803	1	0.0697	0.483	0.314	0.396	0.0441	7.25e-12	0.0524	0.633	1	0.0686	0.0251	0.22	0.21	0.00491
[truncated: 191 more columns]
