# Supplementary material for: Integrative analysis of 3604 GWAS reveals multiple novel cell type-specific regulatory associations
Source: Genome Biol. 2022 Jan 7;23:13. doi: 10.1186/s13059-021-02560-3 (PMC8742386; doi:10.1186/s13059-021-02560-3)
Supplement: Supplementary file 11 — Additional file 11: Table S10. Consolidated Epigenomics Roadmap HMM Chromatin State (15-state model) FORGE2 GWAS catalogue analysis results (q-values). [file 13059_2021_2560_MOESM11_ESM.xlsx]

## Sheet: sig.sites.chrstate15
Table S10: Consolidated Epigenomics Roadmap HMM Chromatin State (15-state model) FORGE2 GWAS catalog analysis results (q-values):
Cell_Tissue_File	Rheumatoid_arthritis_ACPA-positive	General_risk_tolerance_MTAG	Cerebrospinal_fluid_p-Tau181p_AB1-42_ratio	Blood_urea_nitrogen_levels	Soluble_ICAM-1	Interleukin-1-receptor_antagonist_levels	Post_bronchodilator_FEV1FVC_ratio_in_COPD	Mean_platelet_volume	Self-reported_allergy	Intelligence_MTAG	Hypothyroidism	Hair_color	Economic_and_political_preferences_environmentalism	Erosive_tooth_wear_severe_vs_non-severe	Macrophage_inflammatory_protein_1b_levels	Cerebrospinal_fluid_t-tau_AB1-42_ratio	Atrial_fibrillation	Myositis	Waist-to-hip_ratio_adjusted_for_BMI_in_non-smokers	Chronic_lymphocytic_leukemia	Waist-hip_ratio	Cerebrospinal_fluid_t-tau_levels	Cognitive_performance	Monobrow	Crohns_disease	Multiple_sclerosis	Self-reported_math_ability	LDL_cholesterol_levels	Mean_corpuscular_hemoglobin_concentration	Lipoprotein_a_levels	Systemic_lupus_erythematosus	nicotine_metabolite_ratio_in_current_smokers	HDL_cholesterol_levels	End-stage_coagulation	Medication_use_HMG_CoA_reductase_inhibitors	Adolescent_idiopathic_scoliosis	Pulse_pressure	Obesity-related_traits	3-hydroxy-1-methylpropylmercapturic_acid_levels_in_smokers	Waist-to-hip_ratio_adjusted_for_BMI_joint_analysis_main_effects_and_smoking_interaction	Post_bronchodilator_FEV1_in_COPD	Scalp_hair_shape	Cold_sores	Corneal_curvature	Platelet_distribution_width	Blond_vs._brownblack_hair_color	Resting_heart_rate	Lipoproteina_levels_adjusted_for_apolipoproteina_isoforms	Hematocrit
E063_Adipose_Nuclei_Adipose_erc2-chromatin15state-all-files/E063_1_TssA.bed	1	0.565	1	0.231	1	0.912	1	0.00213	1	0.787	0.11	0.0234	1	1	1	1	0.143	1	0.428	1	0.00042	1	0.562	1	0.26	0.172	0.191	1	1	1	0.311	1	1	0.259	0.506	1	0.0522	0.396	1	0.291	0.149	1	1	1	0.22	1	1	1	0.0517
E063_Adipose_Nuclei_Adipose_erc2-chromatin15state-all-files/E063_2_TssAFlnk.bed	1	1	0.722	0.388	1	1	1	0.281	1	0.518	1	0.0143	1	1	0.166	0.754	0.505	1	1	0.00376	0.0565	1	1	1	0.817	1	1	0.456	0.071	1	0.0819	1	0.751	1	0.161	1	0.0293	0.0484	0.393	1	1	1	1	1	0.178	0.857	0.461	1	1
E063_Adipose_Nuclei_Adipose_erc2-chromatin15state-all-files/E063_3_TxFlnk.bed	1	1	1	0.414	0.302	1	1	1	1	1	1	0.104	1	1	1	1	1	1	0.461	0.571	1	1	1	1	0.727	0.18	1	1	1	1	0.692	1	0.726	1	1	1	0.109	0.778	0.322	0.468	1	1	1	1	1	1	1	1	0.478
E063_Adipose_Nuclei_Adipose_erc2-chromatin15state-all-files/E063_4_Tx.bed	1	1	1	1	1	1	1	0.205	1	0.991	1	0.754	1	1	1	1	1	1	1	1	1	1	0.086	1	0.725	0.895	1	0.23	0.87	1	0.745	1	0.151	1	0.103	1	0.038	0.717	1	1	1	1	1	1	0.462	1	1	1	1
E063_Adipose_Nuclei_Adipose_erc2-chromatin15state-all-files/E063_5_TxWk.bed	1	1	1	0.824	1	1	1	8.61e-06	1	0.0725	0.607	0.0469	1	1	0.494	1	0.0952	1	0.495	0.988	1.97e-09	1	0.399	1	0.597	1	1	0.32	0.6	1	0.0661	1	0.811	1	0.745	1	1.17e-05	0.928	1	0.679	1	1	1	1	0.366	1	1	1	1
E063_Adipose_Nuclei_Adipose_erc2-chromatin15state-all-files/E063_6_EnhG.bed	1	1	1	0.607	1	1	1	0.0441	1	1	1	0.346	1	1	1	1	0.945	1	1	1	0.554	1	1	1	0.924	0.243	1	1	0.236	1	0.0698	1	0.0227	1	0.758	1	0.168	0.878	1	1	1	1	1	1	1	1	1	1	0.398
E063_Adipose_Nuclei_Adipose_erc2-chromatin15state-all-files/E063_7_Enh.bed	0.0619	1	1	0.335	1	1	1	9.34e-05	1	0.19	0.717	0.159	1	1	1	1	0.443	1	1	1	6.5e-08	1	1	1	0.00622	0.0118	1	0.586	0.757	1	0.935	1	0.000215	1	0.542	1	0.000322	0.877	1	0.596	0.696	1	1	1	5.02e-05	0.654	1	1	1
E063_Adipose_Nuclei_Adipose_erc2-chromatin15state-all-files/E063_8_ZNF-Rpts.bed	1	1	1	1	1	1	1	1	1	0.842	1	1	1	1	1	1	1	1	1	1	0.414	1	1	1	1	1	1	1	1	1	0.871	1	1	1	0.911	1	1	0.709	0.506	1	1	1	1	1	1	1	1	1	1
E063_Adipose_Nuclei_Adipose_erc2-chromatin15state-all-files/E063_9_Het.bed	1	1	1	1	1	1	0.589	1	1	1	1	1	1	1	0.826	1	1	1	1	1	1	1	1	1	1	1	1	1	1	0.11	1	1	1	1	1	0.622	1	0.876	0.311	1	0.639	1	1	1	1	1	1	0.774	1
E063_Adipose_Nuclei_Adipose_erc2-chromatin15state-all-files/E063_10_TssBiv.bed	0.618	1	1	1	1	1	1	1	1	1	1	0.348	1	1	1	1	0.0939	1	1	0.446	0.136	1	1	1	1	0.58	0.902	1	1	1	0.523	1	1	1	1	0.93	0.00709	0.609	1	1	1	1	1	1	1	1	1	1	1
E063_Adipose_Nuclei_Adipose_erc2-chromatin15state-all-files/E063_11_BivFlnk.bed	1	1	1	0.135	1	1	1	0.808	1	0.0655	1	0.0258	1	1	1	1	0.765	1	1	1	0.029	1	0.971	0.603	0.905	0.175	1	0.984	0.257	1	1	1	1	1	0.529	1	0.705	0.912	1	1	1	0.137	1	0.0161	0.237	1	0.83	1	0.686
E063_Adipose_Nuclei_Adipose_erc2-chromatin15state-all-files/E063_12_EnhBiv.bed	1	1	1	1	1	1	0.872	0.482	1	1	1	0.534	1	1	1	0.63	0.981	1	1	1	0.0061	1	0.394	1	1	0.161	1	1	1	1	1	1	1	1	0.693	1	0.0158	0.373	0.397	1	0.295	1	0.174	1	0.409	0.609	1	1	0.0146
E063_Adipose_Nuclei_Adipose_erc2-chromatin15state-all-files/E063_13_ReprPC.bed	1	0.956	1	0.061	1	1	0.902	1	1	0.65	1	0.366	1	1	0.341	1	0.53	1	1	1	1	1	1	1	1	1	1	1	0.182	1	1	1	1	0.234	1	1	1	0.105	0.763	1	0.445	1	1	1	1	0.08	1	1	0.0188
E063_Adipose_Nuclei_Adipose_erc2-chromatin15state-all-files/E063_14_ReprPCWk.bed	1	1	1	1	1	0.202	0.422	1	1	1	1	1	1	0.222	0.0262	1	1	1	1	1	1	1	1	1	1	1	1	1	1	1	1	1	1	1	1	0.424	1	1	0.198	1	0.834	1	1	0.735	1	0.285	1	1	1
E063_Adipose_Nuclei_Adipose_erc2-chromatin15state-all-files/E063_15_Quies.bed	1	0.0503	1	1	1	1	1	1	1	1	1	1	0.012	1	1	1	1	1	1	1	1	1	1	0.555	1	1	0.0967	1	1	1	1	1	1	1	1	1	1	1	1	1	1	1	1	1	1	1	1	1	1
E080_Fetal_Adrenal_Gland_Adrenal_erc2-chromatin15state-all-files/E080_1_TssA.bed	1	0.851	1	0.229	1	0.912	1	0.103	1	0.442	0.773	0.062	1	1	0.0532	1	0.366	1	1	1	0.00993	1	0.871	1	0.767	1	0.396	1	0.845	1	0.368	1	1	1	0.542	1	0.678	0.0701	0.329	1	0.575	1	1	1	0.513	0.662	1	1	1
E080_Fetal_Adrenal_Gland_Adrenal_erc2-chromatin15state-all-files/E080_2_TssAFlnk.bed	1	1	0.535	0.335	1	1	1	0.0425	1	0.819	1	0.0804	1	1	1	0.425	1	1	1	0.0702	0.775	0.994	1	1	0.131	0.936	1	0.331	0.873	1	0.283	1	1	1	0.612	1	0.0723	0.0318	0.923	1	1	1	1	1	0.924	1	0.774	1	0.795
E080_Fetal_Adrenal_Gland_Adrenal_erc2-chromatin15state-all-files/E080_3_TxFlnk.bed	1	1	0.535	1	1	1	1	0.0994	1	1	1	0.0893	1	1	1	0.399	0.463	1	0.461	1	1	0.37	1	1	1	1	1	1	1	1	1	1	1	1	0.44	1	0.00354	1	1	0.468	1	1	1	1	1	1	1	1	0.474
E080_Fetal_Adrenal_Gland_Adrenal_erc2-chromatin15state-all-files/E080_4_Tx.bed	1	1	1	1	1	1	1	0.421	1	0.89	1	0.483	1	1	0.241	1	1	1	1	1	0.432	1	0.118	1	1	1	1	0.486	0.285	1	0.291	1	0.236	1	0.423	0.91	0.000854	0.631	0.782	1	1	1	1	1	0.181	0.929	0.756	1	1
E080_Fetal_Adrenal_Gland_Adrenal_erc2-chromatin15state-all-files/E080_5_TxWk.bed	1	0.673	1	0.5	1	1	1	2.34e-05	1	0.012	0.425	0.1	1	1	1	1	0.198	1	1	1	0.0739	1	0.808	1	0.466	0.954	1	0.349	1	1	1	1	0.092	1	0.603	1	0.00176	1	1	1	1	1	1	1	0.125	1	1	0.00174	1
E080_Fetal_Adrenal_Gland_Adrenal_erc2-chromatin15state-all-files/E080_6_EnhG.bed	1	1	1	1	1	1	1	0.0382	1	0.741	1	0.368	1	1	0.0303	1	1	1	1	1	0.764	0.37	0.51	1	1	0.101	1	0.0363	0.485	1	0.105	1	0.623	1	0.123	0.219	0.336	0.477	0.0513	1	1	1	1	1	0.797	1	1	1	0.296
E080_Fetal_Adrenal_Gland_Adrenal_erc2-chromatin15state-all-files/E080_7_Enh.bed	0.244	1	1	0.26	1	1	1	0.0534	1	1	1	0.0163	1	1	1	1	0.371	1	1	1	0.0172	1	0.626	1	0.699	0.121	1	0.834	0.612	1	0.789	0.715	0.317	1	0.559	1	0.129	0.877	0.869	0.609	1	1	1	1	0.0231	0.662	0.685	1	0.0191
E080_Fetal_Adrenal_Gland_Adrenal_erc2-chromatin15state-all-files/E080_8_ZNF-Rpts.bed	1	1	1	1	1	1	0.97	1	1	1	1	0.949	1	1	1	1	0.97	1	1	1	0.0766	1	1	1	0.645	1	1	0.984	0.318	0.129	1	1	1	0.108	1	1	0.904	1	1	1	1	1	1	1	1	1	1	1	0.795
E080_Fetal_Adrenal_Gland_Adrenal_erc2-chromatin15state-all-files/E080_9_Het.bed	1	1	1	1	1	1	0.325	1	1	0.672	1	1	1	1	1	1	1	1	1	1	0.609	1	1	1	1	0.93	0.244	1	0.803	1	0.382	1	1	1	0.684	1	1	1	0.133	1	0.389	1	1	1	1	1	1	1	0.925
E080_Fetal_Adrenal_Gland_Adrenal_erc2-chromatin15state-all-files/E080_10_TssBiv.bed	1	0.845	1	0.0728	1	1	0.509	0.113	1	0.443	1	0.123	1	1	1	1	0.00494	1	1	1	0.766	1	0.723	1	1	1	0.139	1	1	1	1	1	1	1	1	1	0.0071	0.296	0.19	1	0.0958	1	1	1	1	1	1	1	1
E080_Fetal_Adrenal_Gland_Adrenal_erc2-chromatin15state-all-files/E080_11_BivFlnk.bed	0.626	0.745	1	0.788	1	1	1	1	1	0.474	1	0.0682	1	1	1	1	0.192	1	0.782	1	1.42e-06	1	0.343	1	1	0.776	0.777	1	1	1	1	1	0.623	1	0.666	1	0.000143	0.768	1	0.765	1	0.00284	1	0.0271	0.905	1	0.281	1	1
E080_Fetal_Adrenal_Gland_Adrenal_erc2-chromatin15state-all-files/E080_12_EnhBiv.bed	1	1	1	0.252	0.664	1	0.788	0.215	1	0.19	0.579	0.79	1	1	0.105	0.987	1	1	1	1	0.00295	1	1	1	0.208	0.0626	1	0.705	0.00915	1	0.297	1	0.976	0.29	0.739	1	0.006	0.0243	0.81	1	0.0382	1	1	0.915	0.492	1	1	1	0.0435
E080_Fetal_Adrenal_Gland_Adrenal_erc2-chromatin15state-all-files/E080_13_ReprPC.bed	0.937	1	1	1	0.0928	0.216	0.902	1	1	1	1	0.232	1	0.0371	0.0146	1	0.907	1	1	0.647	1	1	1	1	1	1	1	1	0.845	1	1	1	1	0.705	1	0.115	1	0.287	0.0274	1	0.41	1	1	1	1	0.00138	1	1	0.232
E080_Fetal_Adrenal_Gland_Adrenal_erc2-chromatin15state-all-files/E080_14_ReprPCWk.bed	1	1	1	1	1	1	0.672	1	1	1	1	1	1	1	0.0421	1	1	1	1	1	1	1	1	0.526	1	1	1	1	1	1	0.904	1	1	1	1	0.152	1	0.718	0.272	1	0.455	1	0.72	1	1	1	1	1	1
E080_Fetal_Adrenal_Gland_Adrenal_erc2-chromatin15state-all-files/E080_15_Quies.bed	1	0.0209	1	1	1	1	1	1	1	0.19	1	1	0.0992	1	1	1	1	1	0.464	1	1	1	1	1	1	1	0.0534	1	1	1	1	1	1	1	1	1	1	1	1	0.802	1	1	1	1	1	1	1	1	1
E029_Primary_monocytes_from_peripheral_blood_Blood_erc2-chromatin15state-all-files/E029_1_TssA.bed	1	0.654	1	1	1	0.81	1	0.0204	1	0.771	0.938	0.0189	1	1	0.106	1	0.169	1	1	0.498	0.0161	1	0.371	1	0.0794	0.67	0.864	1	0.659	1	0.136	0.971	1	1	0.153	1	0.3	0.0559	0.711	1	0.348	1	1	1	0.0105	1	1	1	1
E029_Primary_monocytes_from_peripheral_blood_Blood_erc2-chromatin15state-all-files/E029_2_TssAFlnk.bed	0.344	1	0.578	0.198	1	1	1	8.61e-06	1	0.713	0.0159	0.155	1	1	0.76	0.484	0.863	1	1	0.00277	1	1	1	1	0.421	0.114	0.994	0.827	1	1	0.0472	1	1	1	0.724	1	0.12	0.0899	1	1	1	1	1	1	0.103	0.32	0.607	1	1
E029_Primary_monocytes_from_peripheral_blood_Blood_erc2-chromatin15state-all-files/E029_3_TxFlnk.bed	1	1	1	1	1	1	1	1	1	1	1	0.282	1	1	1	1	1	1	0.281	1	1	1	1	1	1	0.463	1	1	1	0.304	0.471	1	1	1	1	1	0.563	1	1	0.306	1	1	1	1	1	1	1	1	1
E029_Primary_monocytes_from_peripheral_blood_Blood_erc2-chromatin15state-all-files/E029_4_Tx.bed	1	1	1	1	1	1	1	0.00964	1	0.614	0.939	0.549	1	1	0.737	1	1	1	1	0.755	1	1	0.086	1	0.396	0.49	1	0.129	0.529	1	0.00171	1	0.046	1	0.745	0.983	0.0077	0.348	1	1	1	1	1	1	0.507	1	1	1	1
E029_Primary_monocytes_from_peripheral_blood_Blood_erc2-chromatin15state-all-files/E029_5_TxWk.bed	0.011	1	1	0.656	1	1	1	0.00274	1	6.26e-08	0.0331	0.482	1	1	0.365	1	0.981	0.196	0.718	0.784	0.000318	1	0.415	1	0.26	0.000302	1	0.646	0.465	1	0.0363	1	0.667	1	0.745	1	0.0521	1	1	1	0.722	1	1	1	0.453	0.841	0.461	1	0.638
E029_Primary_monocytes_from_peripheral_blood_Blood_erc2-chromatin15state-all-files/E029_6_EnhG.bed	0.851	1	1	1	1	1	0.808	0.000751	1	1	0.513	0.806	1	1	1	1	1	0.971	1	0.853	0.185	0.87	0.878	1	0.233	0.389	1	1	0.235	1	0.0358	1	1	1	1	1	0.994	0.645	1	1	0.834	1	1	1	0.0447	1	1	1	0.232
E029_Primary_monocytes_from_peripheral_blood_Blood_erc2-chromatin15state-all-files/E029_7_Enh.bed	0.0196	1	1	0.97	0.855	1	1	5.01e-06	0.272	0.455	0.412	0.0446	1	1	0.993	1	0.875	1	1	0.117	0.0739	1	1	1	1.81e-10	2.11e-06	1	0.647	0.000474	1	0.00181	1	0.0113	1	0.447	1	0.769	0.932	1	1	1	1	1	1	0.00323	0.494	0.95	1	0.0191
E029_Primary_monocytes_from_peripheral_blood_Blood_erc2-chromatin15state-all-files/E029_8_ZNF-Rpts.bed	1	1	1	1	1	1	1	1	1	1	1	1	1	1	0.513	1	1	1	1	1	0.865	1	1	1	1	1	1	1	1	1	0.746	1	1	1	1	1	1	1	0.855	1	1	1	1	1	0.409	1	1	1	1
E029_Primary_monocytes_from_peripheral_blood_Blood_erc2-chromatin15state-all-files/E029_9_Het.bed	1	1	1	1	1	1	0.0753	1	1	1	1	1	1	1	0.974	1	1	1	1	1	1	1	1	1	1	1	0.766	1	1	0.00239	1	1	1	1	1	0.145	1	0.798	0.146	1	0.887	1	1	1	1	0.67	1	0.0307	1
E029_Primary_monocytes_from_peripheral_blood_Blood_erc2-chromatin15state-all-files/E029_10_TssBiv.bed	1	1	1	1	1	1	0.168	1	1	1	1	1	1	1	1	1	0.136	1	1	1	1	1	1	1	1	1	0.0503	1	1	1	1	1	1	1	1	1	1	1	1	1	0.044	1	1	1	1	1	1	1	1
E029_Primary_monocytes_from_peripheral_blood_Blood_erc2-chromatin15state-all-files/E029_11_BivFlnk.bed	1	0.943	1	0.485	1	1	1	1	1	0.576	1	0.184	1	1	1	1	0.0426	1	1	1	0.0368	1	0.343	0.55	0.781	0.338	0.231	1	1	1	0.284	1	1	1	0.476	1	0.194	0.798	1	1	1	0.00284	1	0.28	1	1	1	1	1
E029_Primary_monocytes_from_peripheral_blood_Blood_erc2-chromatin15state-all-files/E029_12_EnhBiv.bed	1	1	0.722	0.0484	1	1	1	0.691	1	0.629	0.857	0.0735	1	1	1	0.794	0.3	1	1	1	0.00306	0.591	0.877	1	0.0941	1	0.185	1	0.501	1	0.871	1	1	1	1	1	0.247	0.727	0.639	1	1	1	1	0.0419	0.216	1	1	1	0.523
E029_Primary_monocytes_from_peripheral_blood_Blood_erc2-chromatin15state-all-files/E029_13_ReprPC.bed	1	0.969	1	0.00353	1	1	0.0753	1	1	0.804	1	0.00064	1	1	0.849	1	0.203	1	0.457	1	0.0431	1	1	0.256	1	1	1	1	1	0.585	1	1	1	1	0.317	1	0.301	0.73	1	0.437	0.164	1	1	1	0.826	0.00106	0.819	1	0.332
E029_Primary_monocytes_from_peripheral_blood_Blood_erc2-chromatin15state-all-files/E029_14_ReprPCWk.bed	1	1	1	0.886	1	1	1	1	1	0.391	1	0.0935	1	1	1	1	0.846	1	1	1	0.0956	1	0.957	0.644	1	1	1	1	1	0.00777	1	1	1	1	1	1	0.986	0.454	1	1	0.411	1	1	1	1	1	1	0.0619	0.954
E029_Primary_monocytes_from_peripheral_blood_Blood_erc2-chromatin15state-all-files/E029_15_Quies.bed	1	0.306	1	1	1	1	1	1	1	1	1	1	0.214	1	1	1	1	1	1	1	1	1	1	1	1	1	1	1	1	1	1	1	1	1	1	1	1	1	1	1	1	1	1	1	1	1	1	1	1
E030_Primary_neutrophils_from_peripheral_blood_Blood_erc2-chromatin15state-all-files/E030_1_TssA.bed	1	0.205	1	0.259	1	0.576	1	0.0705	1	0.778	0.738	0.0326	1	1	1	1	0.52	1	1	0.3	0.0605	1	0.22	1	0.592	1	0.248	1	0.469	1	0.0119	0.947	1	1	0.267	1	0.572	0.225	0.0443	1	0.208	1	1	1	0.156	1	1	1	0.854
E030_Primary_neutrophils_from_peripheral_blood_Blood_erc2-chromatin15state-all-files/E030_2_TssAFlnk.bed	1	1	1	0.458	1	1	1	2.85e-07	1	0.953	0.148	0.0341	1	1	0.0506	1	1	1	1	0.0497	0.769	1	1	1	0.00127	0.00611	1	1	0.262	1	0.239	1	1	1	0.745	1	0.431	0.0432	0.19	1	1	1	1	1	0.00313	0.654	0.709	1	0.787
E030_Primary_neutrophils_from_peripheral_blood_Blood_erc2-chromatin15state-all-files/E030_3_TxFlnk.bed	0.783	1	1	1	1	1	1	0.637	1	0.576	0.965	0.186	1	0.844	1	1	1	1	1	1	1	1	1	1	0.851	0.821	1	1	0.629	0.534	0.0221	1	1	1	1	1	0.966	0.85	1	1	1	1	1	1	0.594	0.78	1	1	0.203
E030_Primary_neutrophils_from_peripheral_blood_Blood_erc2-chromatin15state-all-files/E030_4_Tx.bed	1	1	1	1	1	1	1	0.163	1	1	1	1	1	1	0.656	1	1	1	1	1	1	1	0.151	1	0.332	0.634	1	0.486	0.438	1	0.00201	1	0.0689	1	0.773	1	0.0208	0.511	1	1	1	1	1	1	0.426	0.938	1	1	1
E030_Primary_neutrophils_from_peripheral_blood_Blood_erc2-chromatin15state-all-files/E030_5_TxWk.bed	0.646	1	1	1	1	1	1	0.000116	1	0.000617	0.608	0.0192	1	1	0.548	0.57	0.563	0.173	1	0.853	0.483	1	0.437	1	0.548	0.0127	0.414	0.0751	0.222	1	0.0049	1	0.221	1	1	1	0.133	0.798	1	1	0.563	1	1	1	0.0631	1	1	1	1
E030_Primary_neutrophils_from_peripheral_blood_Blood_erc2-chromatin15state-all-files/E030_6_EnhG.bed	0.787	0.823	1	1	0.733	1	1	1.08e-05	1	0.897	0.305	1	1	1	0.223	1	1	1	1	0.711	0.209	1	1	1	0.0044	0.117	1	0.43	0.714	1	0.00054	1	1	1	1	0.52	0.595	0.497	1	1	0.862	1	1	1	0.196	1	1	1	0.756
E030_Primary_neutrophils_from_peripheral_blood_Blood_erc2-chromatin15state-all-files/E030_7_Enh.bed	0.0628	1	0.313	1	1	1	1	0.007	0.186	0.768	0.604	0.453	1	1	1	0.412	1	1	1	0.382	0.224	1	0.935	1	5.88e-07	0.00751	1	1	0.101	1	0.547	0.947	0.329	1	0.389	1	0.388	0.191	1	1	1	1	1	1	0.0243	0.895	1	1	0.282
E030_Primary_neutrophils_from_peripheral_blood_Blood_erc2-chromatin15state-all-files/E030_8_ZNF-Rpts.bed	1	1	1	1	1	1	1	1	1	1	1	0.867	1	1	0.481	1	1	1	1	1	0.661	1	0.567	1	0.988	1	1	1	1	1	0.545	1	1	1	1	1	1	0.821	1	1	1	1	1	1	1	1	1	1	1
E030_Primary_neutrophils_from_peripheral_blood_Blood_erc2-chromatin15state-all-files/E030_9_Het.bed	1	1	1	1	1	1	0.505	1	1	1	1	1	1	1	0.915	1	1	1	1	1	1	1	1	1	1	1	1	1	1	0.00304	1	1	1	1	1	0.879	1	0.956	0.0368	1	1	1	1	1	1	1	1	0.0538	1
E030_Primary_neutrophils_from_peripheral_blood_Blood_erc2-chromatin15state-all-files/E030_10_TssBiv.bed	1	1	1	1	1	1	1	1	1	1	1	1	1	1	1	1	0.207	1	1	1	1	1	1	1	1	1	1	1	0.262	1	1	1	1	1	1	1	1	0.398	1	1	1	1	1	1	1	1	1	1	1
E030_Primary_neutrophils_from_peripheral_blood_Blood_erc2-chromatin15state-all-files/E030_11_BivFlnk.bed	0.992	0.36	1	0.476	1	1	0.546	0.659	1	0.622	1	0.584	1	1	1	1	0.00955	1	1	1	0.00969	1	1	1	1	1	0.024	0.953	1	1	1	1	1	1	0.423	1	0.0805	0.799	1	1	0.154	0.00284	1	0.25	1	1	0.765	1	1
E030_Primary_neutrophils_from_peripheral_blood_Blood_erc2-chromatin15state-all-files/E030_12_EnhBiv.bed	0.368	1	1	0.2	1	1	1	0.89	1	0.206	1	0.0351	1	1	1	1	1	1	1	1	0.0301	1	0.107	1	0.233	1	1	0.984	1	1	0.935	1	1	1	1	1	0.417	0.32	1	1	1	1	1	0.335	0.29	0.929	1	1	1
E030_Primary_neutrophils_from_peripheral_blood_Blood_erc2-chromatin15state-all-files/E030_13_ReprPC.bed	1	0.717	1	0.00651	1	1	0.154	0.883	1	0.682	1	0.000795	1	1	0.949	1	0.17	1	0.439	1	0.000832	1	1	0.196	1	1	0.307	1	1	1	0.793	1	0.468	1	0.823	0.85	0.0661	0.527	1	0.41	0.0796	1	1	0.771	1	0.000652	0.451	1	0.0377
E030_Primary_neutrophils_from_peripheral_blood_Blood_erc2-chromatin15state-all-files/E030_14_ReprPCWk.bed	1	1	1	0.521	1	0.0457	0.134	1	1	1	1	0.0266	1	1	0.154	0.568	0.385	1	1	0.791	0.256	0.968	0.402	0.526	1	1	1	1	1	1	0.366	1	1	0.29	0.541	0.879	1	0.727	0.811	1	0.0823	1	1	0.997	1	0.619	1	1	0.329
E030_Primary_neutrophils_from_peripheral_blood_Blood_erc2-chromatin15state-all-files/E030_15_Quies.bed	1	0.0986	1	1	1	1	1	1	1	1	1	1	0.118	1	1	1	1	1	1	1	1	1	1	1	1	1	1	1	1	1	1	1	1	1	1	1	1	1	1	1	1	1	1	1	1	1	1	1	1
E031_Primary_B_cells_from_cord_blood_Blood_erc2-chromatin15state-all-files/E031_1_TssA.bed	0.783	0.611	1	0.408	1	0.877	1	0.155	1	0.295	1	0.083	1	1	0.492	1	1	1	1	0.157	0.304	1	0.946	1	1	0.609	1	1	1	1	0.279	1	1	1	0.862	1	1	0.0221	0.0522	1	0.411	1	1	1	0.00684	1	1	1	0.984
E031_Primary_B_cells_from_cord_blood_Blood_erc2-chromatin15state-all-files/E031_2_TssAFlnk.bed	0.4	0.769	1	0.28	1	1	1	9.89e-06	1	0.601	0.00275	0.075	1	1	0.592	1	0.145	1	1	0.000208	0.392	1	1	1	0.000225	0.000192	0.452	1	0.218	1	1.58e-06	1	1	1	0.693	1	0.0214	0.631	0.504	1	1	1	1	1	0.00448	1	0.835	1	1
E031_Primary_B_cells_from_cord_blood_Blood_erc2-chromatin15state-all-files/E031_3_TxFlnk.bed	1	1	1	1	1	1	1	0.609	1	0.455	1	0.569	1	0.851	1	1	1	1	1	1	0.823	1	1	1	0.827	0.243	1	0.767	0.598	0.556	0.284	1	1	1	0.44	1	0.867	0.454	1	1	1	1	1	1	1	1	1	1	1
E031_Primary_B_cells_from_cord_blood_Blood_erc2-chromatin15state-all-files/E031_4_Tx.bed	1	1	1	1	1	1	1	0.148	1	0.666	0.994	1	1	1	0.878	1	0.569	1	1	0.226	1	1	0.275	1	0.668	0.485	1	0.514	0.728	1	0.383	1	0.198	1	1	1	0.0708	0.968	1	1	1	1	1	1	0.734	1	1	1	0.831
E031_Primary_B_cells_from_cord_blood_Blood_erc2-chromatin15state-all-files/E031_5_TxWk.bed	0.841	0.638	1	0.595	1	1	1	5.92e-06	1	6.76e-06	0.0723	0.121	1	1	0.781	1	0.395	1	1	0.339	0.0299	1	0.086	1	0.00318	0.00751	0.0534	0.713	0.00125	1	3.18e-05	1	0.174	1	1	1	0.000251	1	1	1	1	1	1	1	0.165	0.944	0.549	1	0.758
E031_Primary_B_cells_from_cord_blood_Blood_erc2-chromatin15state-all-files/E031_6_EnhG.bed	0.822	1	1	1	1	1	0.874	0.189	1	0.383	1	0.299	1	1	1	1	1	0.0677	1	0.763	0.301	0.871	0.343	1	0.0907	0.147	1	1	1	1	0.136	1	1	1	1	1	0.924	0.799	0.607	1	1	1	1	1	0.216	1	0.818	1	0.774
E031_Primary_B_cells_from_cord_blood_Blood_erc2-chromatin15state-all-files/E031_7_Enh.bed	1.35e-05	1	1	1	0.537	1	1	0.00102	0.102	0.408	0.00537	0.0387	1	1	1	0.804	1	1	1	0.0808	0.00959	1	0.699	1	3.8e-07	0.000111	1	1	0.0886	1	2.57e-06	0.862	0.591	1	1	1	0.476	0.291	1	1	1	1	0.889	1	0.119	0.74	1	1	0.629
E031_Primary_B_cells_from_cord_blood_Blood_erc2-chromatin15state-all-files/E031_8_ZNF-Rpts.bed	1	1	1	1	1	1	1	1	1	0.617	1	1	1	1	0.804	1	1	1	0.666	1	0.716	1	1	1	1	1	0.978	1	1	1	0.313	1	1	1	0.886	1	1	0.925	1	1	1	1	1	1	0.484	1	1	1	1
E031_Primary_B_cells_from_cord_blood_Blood_erc2-chromatin15state-all-files/E031_9_Het.bed	1	1	1	1	1	1	1	0.789	1	1	1	1	1	1	1	1	1	1	1	1	1	1	1	1	0.407	1	1	0.996	0.349	0.426	0.691	1	1	1	1	0.538	1	0.666	0.504	1	1	1	1	1	1	1	1	1	1
E031_Primary_B_cells_from_cord_blood_Blood_erc2-chromatin15state-all-files/E031_10_TssBiv.bed	1	1	1	0.292	1	1	1	1	1	1	1	0.348	1	1	1	1	0.361	1	1	1	1	1	1	1	1	1	1	1	1	1	1	1	1	1	1	1	1	1	1	1	1	1	1	1	0.301	0.462	1	1	1
E031_Primary_B_cells_from_cord_blood_Blood_erc2-chromatin15state-all-files/E031_11_BivFlnk.bed	1	1	1	1	1	0.357	1	0.521	1	0.15	1	1	1	1	1	1	0.536	1	1	1	0.751	1	0.261	1	0.722	1	1	1	1	1	0.244	1	1	1	1	1	0.363	1	1	1	1	0.113	1	0.266	1	1	0.709	1	1
E031_Primary_B_cells_from_cord_blood_Blood_erc2-chromatin15state-all-files/E031_12_EnhBiv.bed	1	1	1	0.616	1	1	1	0.807	1	1	1	0.239	1	1	1	1	0.718	1	0.507	1	0.0549	1	0.937	0.592	1	0.414	1	1	0.647	1	0.821	1	0.927	1	1	1	0.0975	0.0218	1	0.558	1	1	1	1	0.641	1	1	1	1
E031_Primary_B_cells_from_cord_blood_Blood_erc2-chromatin15state-all-files/E031_13_ReprPC.bed	1	0.201	1	0.0135	1	1	0.583	1	1	0.577	1	0.0479	1	1	1	1	0.528	1	0.776	1	0.131	1	1	0.452	1	1	0.464	1	1	0.73	1	1	0.692	1	0.541	1	0.701	0.306	1	0.781	0.194	1	1	0.133	1	1	1	1	0.562
E031_Primary_B_cells_from_cord_blood_Blood_erc2-chromatin15state-all-files/E031_14_ReprPCWk.bed	1	1	1	0.215	1	0.652	0.675	1	1	1	1	0.69	1	1	0.25	1	0.438	1	1	1	0.986	1	1	1	1	1	1	0.988	1	0.0373	1	0.959	1	0.98	0.384	1	1	1	1	1	0.592	1	1	0.897	1	0.21	0.86	0.0115	0.454
E031_Primary_B_cells_from_cord_blood_Blood_erc2-chromatin15state-all-files/E031_15_Quies.bed	1	0.938	1	1	1	1	1	1	1	1	1	1	0.39	0.902	1	1	1	1	1	1	1	1	1	1	1	1	1	1	1	1	1	1	1	1	1	1	1	1	1	1	1	1	1	1	1	1	1	1	1
E032_Primary_B_cells_from_peripheral_blood_Blood_erc2-chromatin15state-all-files/E032_1_TssA.bed	0.922	0.638	1	0.407	1	0.858	0.901	0.205	1	0.571	0.561	0.046	1	1	0.49	1	0.0774	1	1	0.0592	0.0466	1	0.982	1	0.468	0.191	0.509	1	0.642	1	0.0193	1	1	1	1	1	0.484	0.057	0.144	1	0.0681	1	1	1	0.301	1	1	1	1
E032_Primary_B_cells_from_peripheral_blood_Blood_erc2-chromatin15state-all-files/E032_2_TssAFlnk.bed	0.314	1	1	0.178	1	1	1	0.00121	1	0.681	0.305	0.129	1	1	0.172	1	0.536	1	1	0.00185	0.381	1	1	1	0.0975	0.00389	1	1	0.403	1	0.0135	1	0.796	1	0.674	1	0.0975	0.323	0.932	1	1	1	1	1	0.037	1	0.607	1	1
E032_Primary_B_cells_from_peripheral_blood_Blood_erc2-chromatin15state-all-files/E032_3_TxFlnk.bed	1	0.76	1	1	1	1	1	0.425	1	0.776	1	0.405	1	1	1	1	1	1	1	0.51	0.684	1	0.22	1	0.729	0.666	1	0.627	1	0.304	0.165	1	1	1	0.349	1	0.267	1	1	1	1	1	1	1	1	1	1	1	1
E032_Primary_B_cells_from_peripheral_blood_Blood_erc2-chromatin15state-all-files/E032_4_Tx.bed	1	1	1	1	1	1	1	0.121	1	0.215	0.574	0.711	1	1	0.978	1	0.892	1	1	0.256	0.856	1	0.0613	1	0.131	0.749	1	0.162	0.354	1	0.136	1	0.205	1	0.936	1	0.00437	0.719	1	1	1	1	1	1	0.393	1	1	1	0.943
E032_Primary_B_cells_from_peripheral_blood_Blood_erc2-chromatin15state-all-files/E032_5_TxWk.bed	1	1	1	0.541	1	1	1	0.000143	1	0.00237	0.221	0.0694	1	1	1	1	0.536	1	1	0.504	0.167	1	0.797	1	0.374	0.00012	0.987	1	0.0588	1	0.0016	1	0.912	1	1	1	0.00182	0.91	0.81	1	1	1	1	1	0.654	0.391	1	1	0.758
E032_Primary_B_cells_from_peripheral_blood_Blood_erc2-chromatin15state-all-files/E032_6_EnhG.bed	1	1	1	0.862	1	1	1	0.119	1	0.226	0.965	0.632	1	1	1	1	1	0.0123	1	0.711	0.343	1	0.812	1	0.114	0.00141	1	1	0.509	1	0.00626	1	1	1	1	0.511	1	0.609	0.473	1	0.49	1	1	1	0.0895	1	1	1	1
E032_Primary_B_cells_from_peripheral_blood_Blood_erc2-chromatin15state-all-files/E032_7_Enh.bed	2.19e-07	1	1	1	0.648	1	1	5.65e-06	0.102	0.764	4.09e-05	0.062	1	1	1	0.412	0.618	1	1	7.88e-05	0.355	1	0.467	1	3.8e-07	1.05e-06	1	1	0.0683	1	1.78e-10	1	0.364	1	1	1	0.358	1	1	1	1	1	0.72	1	0.000449	0.721	1	1	0.1
E032_Primary_B_cells_from_peripheral_blood_Blood_erc2-chromatin15state-all-files/E032_8_ZNF-Rpts.bed	1	1	1	1	1	1	1	1	1	1	1	1	1	1	1	1	0.981	1	1	0.93	0.483	1	1	1	1	1	1	1	1	1	0.187	1	1	1	1	1	1	1	1	1	1	1	1	1	0.366	1	1	1	1
E032_Primary_B_cells_from_peripheral_blood_Blood_erc2-chromatin15state-all-files/E032_9_Het.bed	1	1	1	1	1	1	0.37	1	1	0.165	1	1	1	1	0.677	1	1	1	0.658	1	0.941	1	1	1	0.976	1	0.911	1	1	1	1	1	1	1	0.768	0.587	1	0.736	0.222	1	1	1	1	1	1	1	1	1	1
E032_Primary_B_cells_from_peripheral_blood_Blood_erc2-chromatin15state-all-files/E032_10_TssBiv.bed	1	0.358	1	1	1	1	1	1	1	1	1	1	1	1	1	1	0.114	1	1	1	1	1	0.172	1	1	1	0.34	1	1	1	1	1	1	1	1	1	1	1	1	1	1	1	1	1	1	1	1	1	1
E032_Primary_B_cells_from_peripheral_blood_Blood_erc2-chromatin15state-all-files/E032_11_BivFlnk.bed	1	1	1	1	1	1	1	1	1	0.181	1	0.489	1	1	1	1	0.528	1	1	1	0.76	1	0.261	1	0.716	1	1	1	1	1	1	1	1	1	1	1	0.0425	1	1	1	1	0.00152	1	1	1	0.67	1	1	1
E032_Primary_B_cells_from_peripheral_blood_Blood_erc2-chromatin15state-all-files/E032_12_EnhBiv.bed	1	0.565	0.724	0.044	1	1	0.389	0.333	1	0.444	1	0.0802	1	1	1	0.69	0.68	1	0.368	1	3.78e-05	0.456	0.912	0.316	0.26	1	0.0934	1	0.973	1	0.552	1	1	1	0.322	1	0.135	0.0591	1	0.312	0.364	1	1	0.00429	0.579	0.729	0.659	1	0.0841
E032_Primary_B_cells_from_peripheral_blood_Blood_erc2-chromatin15state-all-files/E032_13_ReprPC.bed	1	0.219	1	0.061	1	1	1	1	1	0.127	1	0.137	1	1	0.993	1	0.248	1	0.507	1	0.0797	1	1	1	0.927	1	1	1	1	1	1	1	1	1	1	1	0.477	0.614	1	0.558	0.34	1	1	1	1	0.0268	1	1	0.682
E032_Primary_B_cells_from_peripheral_blood_Blood_erc2-chromatin15state-all-files/E032_14_ReprPCWk.bed	1	1	1	0.115	1	0.0889	0.0753	1	1	1	1	0.434	1	1	0.0977	1	1	1	1	1	0.831	1	1	1	1	1	0.587	0.347	1	0.531	1	1	1	0.991	0.153	1	1	0.718	1	1	1	1	1	0.411	0.316	0.654	1	1	0.673
E032_Primary_B_cells_from_peripheral_blood_Blood_erc2-chromatin15state-all-files/E032_15_Quies.bed	1	0.906	1	1	1	1	1	1	1	1	1	1	0.556	1	1	1	1	1	1	1	1	1	1	1	1	1	1	1	1	1	1	1	1	1	1	1	1	1	1	1	1	1	1	1	1	1	1	1	1
E033_Primary_T_cells_from_cord_blood_Blood_erc2-chromatin15state-all-files/E033_1_TssA.bed	1	0.33	1	0.119	1	0.912	0.509	0.000277	1	0.00784	0.842	0.00622	1	1	0.605	1	0.193	1	1	0.784	0.143	1	0.151	1	0.785	0.259	0.276	1	0.87	1	0.00235	1	1	1	0.267	1	0.168	0.429	0.0564	1	0.0877	1	1	1	0.117	1	0.78	1	1
E033_Primary_T_cells_from_cord_blood_Blood_erc2-chromatin15state-all-files/E033_2_TssAFlnk.bed	0.528	1	0.722	1	1	1	1	0.000235	1	1	0.000342	0.186	1	1	0.106	0.724	0.366	1	1	0.0225	0.99	1	1	1	0.0536	0.000223	1	1	0.173	1	0.0353	1	0.849	1	1	1	0.532	0.107	1	1	1	1	1	1	0.0447	0.735	1	1	1
E033_Primary_T_cells_from_cord_blood_Blood_erc2-chromatin15state-all-files/E033_3_TxFlnk.bed	1	1	1	0.562	1	1	1	0.715	1	0.577	1	0.657	1	1	1	1	1	1	0.5	0.711	1	1	1	1	0.121	0.00277	1	1	0.698	0.479	0.842	1	1	1	1	1	0.986	0.241	1	0.558	1	1	1	1	0.593	1	1	1	1
E033_Primary_T_cells_from_cord_blood_Blood_erc2-chromatin15state-all-files/E033_4_Tx.bed	1	1	1	1	1	1	1	0.109	1	0.753	1	0.122	1	1	0.153	1	1	1	1	0.631	1	1	0.151	1	1	1	1	0.252	0.265	1	0.304	1	0.694	1	0.492	1	0.0394	0.564	1	1	1	1	1	1	0.193	1	1	1	1
E033_Primary_T_cells_from_cord_blood_Blood_erc2-chromatin15state-all-files/E033_5_TxWk.bed	0.494	0.0889	1	0.393	0.762	1	1	6.81e-05	1	8.38e-06	0.0657	0.405	1	1	0.867	1	0.102	1	1	0.203	0.000384	1	0.086	1	0.0115	0.0282	0.949	0.674	0.424	1	0.00502	1	0.198	1	1	1	0.000193	0.932	0.458	1	1	1	1	1	0.137	0.442	1	1	0.668
E033_Primary_T_cells_from_cord_blood_Blood_erc2-chromatin15state-all-files/E033_6_EnhG.bed	0.17	1	1	0.887	1	1	1	0.146	1	1	0.109	0.149	1	1	1	1	1	1	1	1	1	1	0.699	1	0.988	0.0458	1	1	1	1	0.582	1	0.169	1	1	1	0.94	1	0.779	1	1	1	1	1	0.137	1	1	1	1
E033_Primary_T_cells_from_cord_blood_Blood_erc2-chromatin15state-all-files/E033_7_Enh.bed	0.00094	1	1	1	1	1	1	0.115	0.857	0.247	0.000281	0.0561	1	1	1	0.844	0.614	1	1	0.0248	0.412	1	0.437	1	2.3e-05	6.08e-07	1	1	0.0588	1	0.00235	0.807	1	1	1	0.502	0.397	1	1	1	1	1	1	1	0.129	0.707	0.866	1	0.474
E033_Primary_T_cells_from_cord_blood_Blood_erc2-chromatin15state-all-files/E033_8_ZNF-Rpts.bed	1	1	1	1	1	1	1	1	1	0.991	1	1	1	1	1	1	1	1	0.597	0.93	0.528	1	1	1	1	0.639	1	1	1	1	0.752	1	1	1	1	1	1	1	1	1	1	1	1	1	1	1	1	1	1
E033_Primary_T_cells_from_cord_blood_Blood_erc2-chromatin15state-all-files/E033_9_Het.bed	1	1	1	1	1	1	1	1	1	1	1	1	0.156	1	1	1	1	1	1	1	1	1	0.95	1	1	1	1	1	0.823	1	0.541	1	1	1	1	1	1	1	0.923	1	1	1	1	1	1	1	1	1	1
E033_Primary_T_cells_from_cord_blood_Blood_erc2-chromatin15state-all-files/E033_10_TssBiv.bed	1	1	1	0.541	1	1	1	0.731	1	0.268	0.979	0.604	1	1	1	1	0.0112	1	1	1	0.409	1	1	0.573	1	1	0.0888	1	1	1	0.817	1	1	1	1	1	0.982	0.854	1	1	1	0.113	1	1	0.165	1	1	1	0.614
E033_Primary_T_cells_from_cord_blood_Blood_erc2-chromatin15state-all-files/E033_11_BivFlnk.bed	0.187	1	1	0.402	1	1	1	1	1	0.45	1	0.494	1	1	1	1	0.589	1	0.461	1	0.0813	1	0.297	1	0.727	1	0.18	1	0.571	1	0.692	1	1	1	1	1	0.385	0.742	1	0.468	1	0.174	1	0.256	1	1	1	1	1
E033_Primary_T_cells_from_cord_blood_Blood_erc2-chromatin15state-all-files/E033_12_EnhBiv.bed	1	0.796	1	0.0164	0.163	1	1	1	1	0.439	0.189	1	1	1	1	1	1	1	1	1	0.000404	1	0.261	1	0.267	0.783	1	1	0.558	1	1	1	1	0.29	1	0.708	0.0373	1	1	1	1	1	1	0.262	1	1	1	1	1
E033_Primary_T_cells_from_cord_blood_Blood_erc2-chromatin15state-all-files/E033_13_ReprPC.bed	1	0.447	1	0.08	1	0.939	0.806	1	1	1	1	0.144	1	1	1	1	1	1	0.743	1	0.0282	1	1	0.52	1	1	1	1	1	0.354	1	1	0.8	0.686	0.656	1	0.58	0.534	1	0.765	0.24	1	1	0.86	0.714	0.038	1	0.00691	0.572
E033_Primary_T_cells_from_cord_blood_Blood_erc2-chromatin15state-all-files/E033_14_ReprPCWk.bed	1	1	1	1	1	0.727	0.858	1	1	1	1	0.928	1	0.844	0.978	1	1	1	1	1	1	1	1	1	1	1	1	1	1	0.206	1	0.905	1	1	0.413	0.622	1	0.961	0.462	1	0.119	1	1	1	1	1	1	0.385	1
E033_Primary_T_cells_from_cord_blood_Blood_erc2-chromatin15state-all-files/E033_15_Quies.bed	1	0.905	1	1	1	1	1	1	1	1	1	1	1	1	1	1	1	1	1	1	1	1	1	1	1	1	0.203	1	1	1	1	1	1	1	1	1	1	1	1	1	1	1	1	1	1	1	1	1	1
E034_Primary_T_cells_from_peripheral_blood_Blood_erc2-chromatin15state-all-files/E034_1_TssA.bed	0.937	0.36	1	0.461	1	0.945	1	0.336	1	1	0.00379	0.0927	1	1	0.839	1	0.852	1	1	0.251	0.336	1	0.444	1	0.175	0.243	0.691	1	0.776	1	0.0232	1	1	1	0.493	1	0.862	0.0542	0.486	1	0.706	1	1	1	0.414	1	1	1	1
E034_Primary_T_cells_from_peripheral_blood_Blood_erc2-chromatin15state-all-files/E034_2_TssAFlnk.bed	1	1	1	0.57	1	1	1	0.000224	1	0.682	0.0811	0.0561	1	1	0.677	1	0.655	1	1	0.00376	0.415	1	1	1	0.00303	0.000302	1	1	0.257	1	0.0278	1	0.54	1	0.423	1	0.0797	0.291	0.895	1	1	1	1	1	0.0501	0.901	0.425	1	1
E034_Primary_T_cells_from_peripheral_blood_Blood_erc2-chromatin15state-all-files/E034_3_TxFlnk.bed	0.153	1	1	1	1	1	1	0.172	1	0.234	0.939	0.597	1	1	1	1	0.675	1	0.5	1	1	1	1	1	1	0.344	1	1	0.639	0.504	0.793	1	1	1	1	1	0.202	0.482	0.381	0.532	1	1	1	1	1	1	1	1	0.149
E034_Primary_T_cells_from_peripheral_blood_Blood_erc2-chromatin15state-all-files/E034_4_Tx.bed	1	1	1	0.494	1	1	1	0.0628	1	0.688	1	0.335	1	1	0.68	1	1	1	1	0.24	0.69	1	0.153	0.759	0.692	0.454	0.874	0.595	0.325	1	0.685	1	0.432	1	0.434	1	0.0378	0.645	1	1	1	1	1	1	0.457	1	1	1	1
E034_Primary_T_cells_from_peripheral_blood_Blood_erc2-chromatin15state-all-files/E034_5_TxWk.bed	1	1	1	0.377	1	1	1	0.0134	0.637	8.38e-06	0.54	0.825	1	1	1	1	0.478	1	1	0.269	0.0241	1	0.261	1	0.082	0.191	1	0.908	0.318	1	0.00747	1	1	1	1	1	0.000377	1	1	1	1	1	1	1	0.285	0.0687	1	1	0.502
E034_Primary_T_cells_from_peripheral_blood_Blood_erc2-chromatin15state-all-files/E034_6_EnhG.bed	0.242	1	1	1	1	1	1	0.00626	1	1	0.0464	0.227	1	1	0.126	1	1	0.0123	1	0.249	1	1	0.343	1	0.00176	0.0285	1	1	0.22	1	0.0202	1	0.24	1	1	0.418	0.828	0.655	0.844	1	1	1	1	1	0.052	1	1	1	1
E034_Primary_T_cells_from_peripheral_blood_Blood_erc2-chromatin15state-all-files/E034_7_Enh.bed	7.15e-05	1	0.951	1	1	1	1	1.05e-05	0.428	0.506	1.3e-06	0.00384	1	1	0.3	0.412	0.583	1	1	0.492	0.278	1	0.937	1	1.19e-05	1.16e-12	1	1	0.235	1	2.89e-05	0.208	0.976	1	1	0.614	0.904	1	0.256	1	1	1	1	1	0.00723	0.916	1	1	0.957
E034_Primary_T_cells_from_peripheral_blood_Blood_erc2-chromatin15state-all-files/E034_8_ZNF-Rpts.bed	1	1	1	1	1	1	1	1	1	1	1	1	1	1	1	1	0.769	1	1	1	0.183	1	1	1	0.893	1	1	1	1	1	0.858	1	1	1	1	1	1	0.994	1	1	1	1	1	1	1	1	1	1	1
E034_Primary_T_cells_from_peripheral_blood_Blood_erc2-chromatin15state-all-files/E034_9_Het.bed	1	1	1	1	1	1	1	0.774	1	0.682	1	1	1	1	1	1	1	1	1	0.683	1	1	1	1	1	1	1	1	1	1	0.521	1	1	1	0.656	1	1	0.713	0.0805	1	0.3	1	1	1	1	1	1	1	1
E034_Primary_T_cells_from_peripheral_blood_Blood_erc2-chromatin15state-all-files/E034_10_TssBiv.bed	1	1	1	1	1	1	0.258	1	1	1	1	1	1	1	1	1	1	1	1	1	0.273	1	1	1	1	1	1	1	1	1	1	1	1	1	1	1	1	1	1	1	0.0958	1	1	1	1	1	1	1	1
E034_Primary_T_cells_from_peripheral_blood_Blood_erc2-chromatin15state-all-files/E034_11_BivFlnk.bed	0.525	0.646	1	0.673	1	1	1	0.92	1	0.295	1	0.113	1	1	0.121	1	0.105	1	1	1	0.312	1	0.556	1	0.476	1	0.996	1	1	1	1	1	1	1	1	1	0.237	0.105	1	1	1	0.104	1	1	1	0.929	0.835	1	1
E034_Primary_T_cells_from_peripheral_blood_Blood_erc2-chromatin15state-all-files/E034_12_EnhBiv.bed	1	1	1	0.475	0.607	1	0.614	0.446	1	0.0394	0.574	0.029	1	1	0.382	0.872	0.0566	1	0.575	1	0.00178	1	0.471	1	0.699	1	0.429	1	0.755	1	0.142	1	1	1	0.27	1	0.0103	0.162	1	0.533	0.105	0.389	1	0.00947	0.534	0.00535	1	1	0.109
E034_Primary_T_cells_from_peripheral_blood_Blood_erc2-chromatin15state-all-files/E034_13_ReprPC.bed	1	1	1	0.377	1	1	0.203	0.958	1	1	1	0.12	1	1	0.159	1	0.188	1	1	1	0.448	0.62	1	1	1	1	1	1	1	0.279	1	0.947	1	0.149	0.758	0.197	0.0989	0.632	0.0122	1	0.493	1	0.889	1	0.414	0.34	0.77	1	0.1
E034_Primary_T_cells_from_peripheral_blood_Blood_erc2-chromatin15state-all-files/E034_14_ReprPCWk.bed	1	1	1	0.89	1	0.382	1	1	1	1	1	1	1	0.605	0.124	1	1	1	1	1	1	1	1	1	1	1	1	1	1	0.000458	1	1	1	1	0.562	0.632	1	0.818	1	1	0.68	1	1	1	1	1	1	0.108	0.984
E034_Primary_T_cells_from_peripheral_blood_Blood_erc2-chromatin15state-all-files/E034_15_Quies.bed	1	1.34e-05	1	1	1	1	1	1	1	0.583	1	1	0.123	1	1	1	1	1	0.132	1	1	1	0.897	1	1	1	0.0403	1	1	1	1	1	1	1	1	1	1	1	1	0.281	1	1	1	1	1	1	1	1	1
E035_Primary_hematopoietic_stem_cells_Blood_erc2-chromatin15state-all-files/E035_1_TssA.bed	1	1	1	1	1	0.877	0.982	0.161	1	0.284	1	0.0358	1	1	1	1	0.143	1	1	0.441	0.0282	1	1	1	0.777	0.934	1	1	1	1	0.0413	1	1	1	0.894	1	0.395	0.143	0.0563	1	0.47	1	1	1	1	0.724	1	1	1
E035_Primary_hematopoietic_stem_cells_Blood_erc2-chromatin15state-all-files/E035_2_TssAFlnk.bed	1	0.653	1	0.0202	1	1	1	8.61e-06	1	0.462	0.00379	0.0935	1	1	0.192	1	0.512	1	1	0.0702	0.109	1	0.797	1	0.0929	0.0167	0.136	1	0.729	1	0.0534	1	1	1	0.212	1	0.0135	0.229	1	1	1	1	1	1	5.02e-05	1	0.411	1	1
E035_Primary_hematopoietic_stem_cells_Blood_erc2-chromatin15state-all-files/E035_3_TxFlnk.bed	1	0.379	1	1	1	1	1	1	1	1	1	1	1	1	1	1	1	1	1	1	1	1	1	1	1	1	1	1	1	1	0.374	1	1	1	1	1	0.388	1	1	1	1	1	1	1	1	1	1	1	1
E035_Primary_hematopoietic_stem_cells_Blood_erc2-chromatin15state-all-files/E035_4_Tx.bed	1	1	1	1	1	1	1	0.0419	1	0.787	1	0.226	1	1	1	1	1	1	1	1	1	1	0.128	1	0.552	0.433	1	0.274	0.587	1	0.286	1	0.112	1	1	1	0.12	0.533	1	1	1	1	1	1	0.635	1	1	1	1
E035_Primary_hematopoietic_stem_cells_Blood_erc2-chromatin15state-all-files/E035_5_TxWk.bed	0.122	0.826	1	0.825	1	1	1	5.65e-06	1	2.08e-07	0.000987	0.438	1	1	0.404	0.547	0.0829	0.706	1	0.00736	0.00553	1	0.132	1	0.00622	0.00639	0.0888	0.497	0.0445	1	4.13e-05	1	1	1	0.595	1	3e-05	0.871	0.932	1	1	1	1	1	0.0261	1	0.479	1	0.497
E035_Primary_hematopoietic_stem_cells_Blood_erc2-chromatin15state-all-files/E035_6_EnhG.bed	1	1	1	0.986	0.682	1	1	0.287	1	0.741	1	0.674	1	1	1	1	1	1	0.856	1	1	1	1	1	1	0.783	1	1	0.465	1	1	1	0.547	1	1	1	0.509	1	0.285	0.868	1	1	1	1	0.185	1	0.996	1	1
E035_Primary_hematopoietic_stem_cells_Blood_erc2-chromatin15state-all-files/E035_7_Enh.bed	7.15e-05	1	1	0.444	1	1	1	4.55e-13	0.0859	1	0.652	0.499	1	1	1	1	0.473	1	1	0.502	0.0441	1	1	1	4.34e-08	7.97e-06	1	0.495	0.00103	1	0.034	1	0.511	1	1	1	0.0792	1	1	1	0.696	1	1	1	9.15e-07	0.0966	1	1	0.129
E035_Primary_hematopoietic_stem_cells_Blood_erc2-chromatin15state-all-files/E035_8_ZNF-Rpts.bed	1	1	1	1	1	1	1	1	1	1	1	1	1	1	0.939	1	0.883	1	0.859	1	1	1	0.71	1	0.77	1	1	1	1	1	1	1	1	1	1	1	0.988	1	1	1	1	1	1	1	1	1	1	1	1
E035_Primary_hematopoietic_stem_cells_Blood_erc2-chromatin15state-all-files/E035_9_Het.bed	1	1	1	1	1	1	0.788	1	1	1	1	1	1	1	1	1	1	1	1	1	1	1	1	1	0.716	1	1	1	0.689	1	0.82	1	1	1	1	0.175	1	0.06	0.081	1	1	0.198	1	1	1	1	1	1	1
E035_Primary_hematopoietic_stem_cells_Blood_erc2-chromatin15state-all-files/E035_10_TssBiv.bed	1	1	1	1	1	1	1	1	1	1	1	0.282	1	1	1	1	1	1	1	1	0.0766	1	1	1	1	1	0.69	0.427	1	1	0.366	1	1	1	0.322	1	1	0.496	1	1	1	1	1	1	1	1	1	1	1
E035_Primary_hematopoietic_stem_cells_Blood_erc2-chromatin15state-all-files/E035_11_BivFlnk.bed	1	1	1	1	1	1	1	1	1	1	1	1	1	1	1	1	1	1	1	1	0.791	1	0.743	1	1	1	1	1	1	1	1	1	0.791	1	1	1	0.36	1	1	1	1	0.137	1	0.304	1	1	1	1	1
E035_Primary_hematopoietic_stem_cells_Blood_erc2-chromatin15state-all-files/E035_12_EnhBiv.bed	1	1	1	0.596	1	1	0.652	1	1	0.123	1	0.0216	1	1	1	1	0.258	1	0.631	0.791	0.0135	1	0.9	1	1	0.389	1	1	0.612	1	0.863	1	1	1	1	1	0.267	0.215	1	0.609	1	1	1	0.256	1	0.855	0.78	1	0.211
E035_Primary_hematopoietic_stem_cells_Blood_erc2-chromatin15state-all-files/E035_13_ReprPC.bed	1	0.796	1	0.0162	1	1	1	1	1	0.682	1	0.412	1	1	1	1	0.768	1	0.465	1	0.0741	1	0.845	0.276	1	1	1	1	1	0.913	1	1	1	1	1	1	0.158	0.928	1	0.477	0.564	1	1	0.637	0.575	0.945	1	1	0.687
E035_Primary_hematopoietic_stem_cells_Blood_erc2-chromatin15state-all-files/E035_14_ReprPCWk.bed	1	1	1	1	1	1	1	1	1	1	1	0.673	1	1	1	1	1	1	1	1	1	1	1	0.902	1	1	1	1	1	0.00466	1	0.61	1	1	1	1	1	0.499	1	1	0.49	1	1	1	1	0.728	1	0.00747	0.953
E035_Primary_hematopoietic_stem_cells_Blood_erc2-chromatin15state-all-files/E035_15_Quies.bed	1	1	1	1	1	1	1	1	1	1	1	1	0.933	1	1	1	1	1	1	1	1	1	1	1	1	1	1	1	1	1	1	1	1	1	1	1	1	1	1	1	1	1	1	1	1	1	1	1	1
E036_Primary_hematopoietic_stem_cells_short_term_culture_Blood_erc2-chromatin15state-all-files/E036_1_TssA.bed	1	0.71	1	1	1	0.912	0.476	0.0387	1	0.236	1	0.147	1	1	0.181	1	0.793	1	1	0.549	0.0308	1	0.71	1	0.905	1	0.974	1	0.712	1	0.0903	1	1	1	0.43	1	0.84	0.0554	0.0805	1	0.111	1	1	1	1	1	1	1	1
E036_Primary_hematopoietic_stem_cells_short_term_culture_Blood_erc2-chromatin15state-all-files/E036_2_TssAFlnk.bed	1	1	1	0.28	1	1	1	3.73e-06	0.544	0.925	0.048	0.173	1	1	1	0.641	0.114	1	1	0.308	1	1	1	1	0.000112	0.171	1	1	0.00658	1	0.181	1	1	1	1	1	0.00843	0.406	0.852	1	1	1	1	1	1.5e-05	0.488	1	1	0.405
E036_Primary_hematopoietic_stem_cells_short_term_culture_Blood_erc2-chromatin15state-all-files/E036_3_TxFlnk.bed	1	1	0.71	1	1	1	1	0.111	1	1	1	0.134	1	0.98	1	0.63	0.86	1	0.627	0.308	0.71	0.579	1	1	1	0.243	1	0.427	0.421	0.858	0.562	1	1	1	0.225	0.672	1	0.723	0.482	0.706	1	1	1	1	1	1	0.872	1	0.797
E036_Primary_hematopoietic_stem_cells_short_term_culture_Blood_erc2-chromatin15state-all-files/E036_4_Tx.bed	1	1	1	1	1	1	1	6.5e-05	1	0.202	0.797	0.221	1	1	0.152	1	1	1	1	1	0.951	1	0.0364	1	0.738	0.93	0.996	0.0774	0.0739	1	0.0117	1	0.232	1	0.637	0.644	0.00438	0.482	1	1	0.537	1	1	1	0.541	0.873	1	1	0.929
E036_Primary_hematopoietic_stem_cells_short_term_culture_Blood_erc2-chromatin15state-all-files/E036_5_TxWk.bed	0.222	1	1	0.476	1	1	1	0.0421	1	0.000154	0.725	0.521	1	1	1	0.749	0.105	1	1	0.314	0.00033	0.968	1	1	0.238	0.000981	0.656	0.409	0.734	1	0.0324	1	1	1	0.982	1	0.000193	0.98	1	1	1	1	1	1	0.0167	1	1	1	0.527
E036_Primary_hematopoietic_stem_cells_short_term_culture_Blood_erc2-chromatin15state-all-files/E036_6_EnhG.bed	1	0.526	1	1	0.953	1	1	2.72e-05	1	1	1	0.715	1	1	1	0.543	1	1	1	0.631	0.0797	0.878	0.367	1	0.0176	0.00183	1	0.804	0.235	1	0.0247	1	0.912	1	1	1	0.459	0.732	0.334	1	1	1	1	1	0.0274	1	0.316	1	0.758
E036_Primary_hematopoietic_stem_cells_short_term_culture_Blood_erc2-chromatin15state-all-files/E036_7_Enh.bed	4.99e-05	1	1	0.22	1	1	1	4.59e-08	0.857	0.386	0.000398	0.14	1	1	1	1	0.341	1	1	0.182	0.0462	1	1	1	9.4e-07	4.56e-05	1	1	0.438	1	0.0176	0.61	0.233	1	0.951	1	0.0378	1	1	1	0.858	1	1	1	9.15e-07	0.0251	1	1	0.126
E036_Primary_hematopoietic_stem_cells_short_term_culture_Blood_erc2-chromatin15state-all-files/E036_8_ZNF-Rpts.bed	1	1	1	1	1	1	1	0.28	1	0.71	1	1	1	1	0.893	1	1	1	0.918	1	0.778	1	1	1	0.77	1	1	1	1	1	1	1	1	1	1	1	1	1	1	1	1	1	1	1	0.153	1	1	1	1
E036_Primary_hematopoietic_stem_cells_short_term_culture_Blood_erc2-chromatin15state-all-files/E036_9_Het.bed	1	1	1	1	1	1	0.374	1	1	1	1	1	1	1	0.45	0.52	1	1	1	1	1	1	1	1	0.648	1	1	1	0.438	1	0.719	1	1	1	0.203	0.827	1	0.662	0.0133	1	1	1	1	1	1	1	1	1	1
E036_Primary_hematopoietic_stem_cells_short_term_culture_Blood_erc2-chromatin15state-all-files/E036_10_TssBiv.bed	1	1	1	1	1	1	1	1	1	1	1	1	1	1	1	1	1	1	1	1	1	1	0.334	1	1	1	1	1	1	1	1	1	1	1	1	1	0.215	1	1	1	1	1	1	1	1	1	1	1	1
E036_Primary_hematopoietic_stem_cells_short_term_culture_Blood_erc2-chromatin15state-all-files/E036_11_BivFlnk.bed	0.899	0.924	1	1	1	1	1	0.639	1	0.953	1	0.166	1	1	1	1	0.599	1	1	1	0.0061	1	0.334	1	1	1	0.221	0.866	1	1	0.702	1	0.822	1	0.423	1	0.412	0.327	1	1	0.154	0.104	1	0.00987	0.153	1	1	1	1
E036_Primary_hematopoietic_stem_cells_short_term_culture_Blood_erc2-chromatin15state-all-files/E036_12_EnhBiv.bed	1	0.287	1	0.757	1	1	1	1	1	0.0132	1	0.0553	1	1	1	1	0.415	1	0.24	1	0.00549	1	0.561	1	0.981	0.626	0.585	1	0.761	1	0.578	1	1	1	0.613	1	0.115	0.188	1	0.188	1	1	1	0.375	1	1	0.24	1	0.797
E036_Primary_hematopoietic_stem_cells_short_term_culture_Blood_erc2-chromatin15state-all-files/E036_13_ReprPC.bed	1	1	1	0.0202	1	1	0.517	1	1	1	1	0.0369	1	1	0.43	1	0.539	1	0.48	1	0.0609	1	1	0.0896	1	1	1	1	0.988	1	1	1	1	0.249	1	0.201	0.861	0.511	0.809	0.506	0.0224	1	1	1	1	0.0364	1	1	0.185
E036_Primary_hematopoietic_stem_cells_short_term_culture_Blood_erc2-chromatin15state-all-files/E036_14_ReprPCWk.bed	1	1	1	1	1	0.303	0.154	1	1	1	1	0.11	1	0.42	0.454	1	1	1	1	1	1	1	0.993	1	1	1	1	1	1	0.528	1	0.422	1	1	0.243	1	1	0.605	0.81	1	1	1	1	1	1	1	1	1	1
E036_Primary_hematopoietic_stem_cells_short_term_culture_Blood_erc2-chromatin15state-all-files/E036_15_Quies.bed	1	0.0765	1	1	1	1	1	1	1	1	1	1	0.129	1	1	1	1	1	1	1	1	1	1	1	1	1	1	1	1	1	1	1	1	1	1	1	1	1	1	1	1	1	1	1	1	1	1	1	1
E037_Primary_T_helper_memory_cells_from_peripheral_blood_2_Blood_erc2-chromatin15state-all-files/E037_1_TssA.bed	1	0.629	1	0.278	1	0.912	1	0.105	1	0.404	0.0657	0.00274	1	1	0.135	1	0.0938	1	1	0.339	0.135	1	0.27	1	0.317	0.0517	0.268	1	0.865	1	0.000569	1	1	1	0.114	1	0.064	0.139	0.0513	1	0.0914	0.691	1	1	0.137	1	1	1	1
E037_Primary_T_helper_memory_cells_from_peripheral_blood_2_Blood_erc2-chromatin15state-all-files/E037_2_TssAFlnk.bed	0.368	1	1	1	1	1	1	0.000548	1	0.882	0.000504	0.17	1	1	0.906	1	0.495	1	1	0.0225	0.841	1	1	1	0.0582	0.104	1	1	0.155	1	0.31	1	0.579	1	1	1	0.24	0.211	0.58	1	1	1	1	1	0.508	1	0.993	1	1
E037_Primary_T_helper_memory_cells_from_peripheral_blood_2_Blood_erc2-chromatin15state-all-files/E037_3_TxFlnk.bed	1	1	1	1	1	1	1	1	1	0.682	1	0.348	1	1	1	1	1	1	1	1	1	1	1	1	0.572	0.51	1	1	1	0.204	1	1	1	1	1	1	0.566	1	1	1	1	1	1	1	1	1	1	1	1
E037_Primary_T_helper_memory_cells_from_peripheral_blood_2_Blood_erc2-chromatin15state-all-files/E037_4_Tx.bed	1	1	1	1	1	1	1	0.125	1	0.88	1	0.602	1	1	1	1	1	1	1	1	1	1	0.437	1	1	1	1	1	1	1	1	1	0.781	1	0.297	1	1	1	1	1	1	1	1	1	0.237	1	1	1	1
E037_Primary_T_helper_memory_cells_from_peripheral_blood_2_Blood_erc2-chromatin15state-all-files/E037_5_TxWk.bed	1	1	1	0.126	1	1	1	3.32e-05	1	0.00459	0.122	0.0257	1	1	0.225	0.868	0.692	1	1	0.215	0.0019	1	0.17	1	0.000968	0.0048	0.187	0.9	0.000137	1	9.24e-05	1	0.585	1	1	1	2.11e-05	0.429	1	1	1	1	1	1	0.553	0.214	1	1	0.621
E037_Primary_T_helper_memory_cells_from_peripheral_blood_2_Blood_erc2-chromatin15state-all-files/E037_6_EnhG.bed	0.176	1	1	1	1	1	1	0.45	1	1	0.595	1	1	1	1	1	1	0.914	0.876	1	1	1	1	1	0.978	0.131	1	0.772	1	1	0.237	1	0.772	1	1	1	0.82	0.752	1	0.892	1	1	1	1	0.297	1	1	1	0.6
E037_Primary_T_helper_memory_cells_from_peripheral_blood_2_Blood_erc2-chromatin15state-all-files/E037_7_Enh.bed	2.03e-07	1	1	1	0.839	1	1	5.14e-06	0.000217	0.405	1.64e-07	0.0379	1	1	1	1	0.505	0.977	1	0.0842	0.285	1	0.413	1	8.51e-09	7.8e-17	1	1	0.318	1	1.72e-06	0.55	0.937	1	1	0.937	0.98	0.936	1	1	1	1	1	1	0.00127	0.251	0.849	1	0.346
E037_Primary_T_helper_memory_cells_from_peripheral_blood_2_Blood_erc2-chromatin15state-all-files/E037_8_ZNF-Rpts.bed	1	1	1	1	1	1	1	1	1	1	1	1	1	1	1	1	1	1	1	1	0.697	1	1	1	1	1	1	1	1	1	0.695	1	1	1	1	1	1	0.819	1	1	1	1	1	1	1	1	1	1	1
E037_Primary_T_helper_memory_cells_from_peripheral_blood_2_Blood_erc2-chromatin15state-all-files/E037_9_Het.bed	1	1	1	1	1	1	0.902	1	1	0.521	1	0.964	1	1	1	1	1	1	1	1	0.571	1	1	1	0.916	1	0.978	1	0.937	1	0.935	1	1	1	1	1	1	0.973	1	1	1	1	1	1	1	1	1	1	1
E037_Primary_T_helper_memory_cells_from_peripheral_blood_2_Blood_erc2-chromatin15state-all-files/E037_10_TssBiv.bed	1	1	1	1	1	1	1	1	1	1	1	1	1	1	1	1	1	1	1	1	1	1	1	1	1	1	1	1	1	1	1	1	1	1	1	1	1	1	1	1	1	1	1	1	1	1	1	1	1
E037_Primary_T_helper_memory_cells_from_peripheral_blood_2_Blood_erc2-chromatin15state-all-files/E037_11_BivFlnk.bed	0.499	0.48	1	1	1	1	1	1	1	0.518	1	1	1	1	1	1	1	1	1	1	1	1	0.41	1	1	1	1	1	1	1	1	1	1	1	1	1	0.364	1	1	1	1	1	1	1	1	1	1	1	1
E037_Primary_T_helper_memory_cells_from_peripheral_blood_2_Blood_erc2-chromatin15state-all-files/E037_12_EnhBiv.bed	1	0.0773	1	0.444	1	1	1	1	1	0.441	1	0.534	1	1	1	1	0.195	1	0.507	0.65	0.0206	1	0.768	1	0.756	0.802	0.172	1	0.538	1	0.746	1	1	1	1	1	1	0.778	1	0.542	1	1	1	0.00872	1	1	1	1	1
E037_Primary_T_helper_memory_cells_from_peripheral_blood_2_Blood_erc2-chromatin15state-all-files/E037_13_ReprPC.bed	1	0.243	1	0.768	1	1	1	1	1	0.51	1	0.186	1	1	1	1	0.0454	1	0.718	1	0.0613	1	0.638	0.672	1	1	0.495	1	1	0.887	1	1	1	1	1	1	0.00147	0.501	1	0.702	0.0877	0.25	1	1	0.788	1	1	1	0.116
E037_Primary_T_helper_memory_cells_from_peripheral_blood_2_Blood_erc2-chromatin15state-all-files/E037_14_ReprPCWk.bed	1	1	1	0.102	1	1	0.535	0.617	1	0.936	1	0.141	1	1	1	1	0.663	1	1	1	0.372	1	1	0.236	1	1	0.587	1	1	0.212	1	1	0.904	1	0.739	1	0.267	0.688	1	1	1	1	1	1	0.274	0.724	0.66	0.97	0.735
E037_Primary_T_helper_memory_cells_from_peripheral_blood_2_Blood_erc2-chromatin15state-all-files/E037_15_Quies.bed	1	1	1	1	1	1	1	1	1	1	1	1	1	0.896	1	1	1	1	1	1	1	1	1	1	1	1	1	1	1	1	1	1	1	0.991	1	1	1	1	1	1	1	1	1	1	1	1	1	1	1
E038_Primary_T_helper_naive_cells_from_peripheral_blood_Blood_erc2-chromatin15state-all-files/E038_1_TssA.bed	0.736	0.693	1	0.132	1	0.945	1	0.0211	1	0.801	0.242	0.0022	1	1	0.192	1	0.254	1	1	0.17	0.19	1	0.319	1	0.381	0.303	0.221	1	1	1	0.0115	1	1	1	0.292	1	0.153	0.351	0.329	1	0.112	1	1	1	0.068	1	0.83	1	1
E038_Primary_T_helper_naive_cells_from_peripheral_blood_Blood_erc2-chromatin15state-all-files/E038_2_TssAFlnk.bed	0.416	0.726	1	1	1	1	1	0.00708	1	0.697	0.00102	0.534	1	1	0.971	0.614	1	0.104	1	0.00198	0.44	1	1	1	0.0143	1.05e-06	1	1	0.188	1	0.0486	1	1	1	1	1	0.777	0.0442	1	1	1	1	1	1	0.595	1	1	1	1
E038_Primary_T_helper_naive_cells_from_peripheral_blood_Blood_erc2-chromatin15state-all-files/E038_3_TxFlnk.bed	1	1	1	1	1	1	1	1	1	0.833	1	0.117	1	1	1	1	1	1	1	1	1	1	1	1	0.748	1	1	1	0.589	0.394	1	1	1	1	1	1	0.82	1	1	1	1	1	1	1	1	1	1	1	1
E038_Primary_T_helper_naive_cells_from_peripheral_blood_Blood_erc2-chromatin15state-all-files/E038_4_Tx.bed	1	1	1	1	1	1	1	0.0241	1	1	1	1	1	1	0.704	1	1	1	1	1	1	1	0.133	0.624	0.458	1	1	1	1	1	0.994	1	1	1	0.475	1	0.62	1	1	1	1	1	1	1	0.171	1	1	1	0.714
E038_Primary_T_helper_naive_cells_from_peripheral_blood_Blood_erc2-chromatin15state-all-files/E038_5_TxWk.bed	0.864	1	1	0.0954	0.752	1	1	3.56e-05	1	0.0174	0.0639	0.00696	1	1	0.816	0.345	0.463	1	1	0.335	0.000383	1	0.308	1	0.101	0.0728	0.289	0.978	0.042	1	0.00456	1	1	1	1	1	0.00144	0.689	0.316	1	1	1	1	1	0.685	0.238	1	1	1
E038_Primary_T_helper_naive_cells_from_peripheral_blood_Blood_erc2-chromatin15state-all-files/E038_6_EnhG.bed	1	1	1	1	1	1	1	0.199	1	1	0.27	0.29	1	1	1	1	1	1	0.889	0.567	1	1	1	1	0.408	0.0149	1	0.795	1	1	0.134	1	0.329	1	1	1	1	1	1	0.894	1	1	1	1	1	1	1	1	0.587
E038_Primary_T_helper_naive_cells_from_peripheral_blood_Blood_erc2-chromatin15state-all-files/E038_7_Enh.bed	8.76e-05	1	1	1	1	1	1	3.55e-05	0.0451	0.31	7.97e-08	0.0192	1	1	1	1	0.461	1	1	0.0754	1	1	0.343	1	3.43e-06	1.1e-10	1	1	0.011	1	5e-06	0.342	0.825	1	1	1	0.493	1	1	1	1	1	1	1	0.000177	0.299	0.843	1	0.522
E038_Primary_T_helper_naive_cells_from_peripheral_blood_Blood_erc2-chromatin15state-all-files/E038_8_ZNF-Rpts.bed	1	1	1	1	1	1	1	1	1	1	1	1	1	1	1	1	1	1	1	1	0.343	1	1	1	1	1	1	1	1	1	0.813	1	1	1	1	1	1	1	1	1	1	1	1	1	1	1	1	1	1
E038_Primary_T_helper_naive_cells_from_peripheral_blood_Blood_erc2-chromatin15state-all-files/E038_9_Het.bed	1	1	1	0.876	1	1	1	1	1	1	1	1	1	1	1	1	1	1	1	1	1	1	1	1	1	1	1	1	0.741	1	1	1	1	1	1	1	1	0.961	0.613	1	0.769	1	1	1	1	1	1	1	1
E038_Primary_T_helper_naive_cells_from_peripheral_blood_Blood_erc2-chromatin15state-all-files/E038_10_TssBiv.bed	1	0.32	1	1	1	1	1	1	1	1	1	1	1	1	1	1	0.154	1	1	1	1	1	1	1	1	1	1	1	0.229	1	1	1	1	1	1	1	0.237	1	1	1	1	0.0442	1	1	1	1	1	1	1
E038_Primary_T_helper_naive_cells_from_peripheral_blood_Blood_erc2-chromatin15state-all-files/E038_11_BivFlnk.bed	1	1	1	1	1	1	1	1	1	0.562	1	1	1	1	1	1	0.286	1	1	1	1	1	1	1	0.407	1	1	1	1	1	1	1	1	1	1	1	0.458	1	1	1	1	1	1	1	1	1	1	1	1
E038_Primary_T_helper_naive_cells_from_peripheral_blood_Blood_erc2-chromatin15state-all-files/E038_12_EnhBiv.bed	0.822	0.287	0.535	0.494	1	1	0.603	1	1	0.181	1	1	1	1	1	0.456	0.661	1	0.5	1	0.000832	0.282	0.326	1	0.784	0.813	0.5	1	1	1	1	1	1	1	1	1	0.0399	0.113	1	0.468	1	0.142	1	0.262	1	1	1	1	0.0258
E038_Primary_T_helper_naive_cells_from_peripheral_blood_Blood_erc2-chromatin15state-all-files/E038_13_ReprPC.bed	1	0.0209	1	0.0189	1	1	0.956	0.446	1	0.296	1	0.076	1	1	1	1	0.185	1	0.0736	1	0.00927	1	0.338	1	1	1	0.576	1	1	1	1	1	1	1	1	1	0.064	1	1	0.0645	0.0023	1	1	1	0.806	0.578	1	1	0.854
E038_Primary_T_helper_naive_cells_from_peripheral_blood_Blood_erc2-chromatin15state-all-files/E038_14_ReprPCWk.bed	1	0.856	1	0.421	1	1	1	1	1	0.745	1	0.0154	1	1	0.94	1	0.552	1	1	1	0.663	1	1	0.0623	0.672	1	0.835	1	1	1	1	1	0.969	1	0.693	1	0.117	0.79	1	0.994	1	1	1	0.2	1	0.698	0.24	1	0.46
E038_Primary_T_helper_naive_cells_from_peripheral_blood_Blood_erc2-chromatin15state-all-files/E038_15_Quies.bed	1	1	1	1	1	1	1	1	1	1	1	1	1	1	1	1	1	1	1	1	1	1	1	1	1	1	1	1	1	1	1	1	1	1	1	1	1	1	1	1	1	1	1	1	1	1	1	1	1
E039_Primary_T_helper_naive_cells_from_peripheral_blood_Blood_erc2-chromatin15state-all-files/E039_1_TssA.bed	1	0.654	1	0.145	1	0.912	1	0.0892	1	0.0201	0.574	0.0264	1	1	0.68	1	0.204	1	1	1	0.0678	1	1	1	0.621	0.422	0.0182	1	1	1	0.0122	1	1	1	0.0886	1	0.0306	0.655	0.0902	1	0.547	1	1	1	1	1	0.709	1	1
E039_Primary_T_helper_naive_cells_from_peripheral_blood_Blood_erc2-chromatin15state-all-files/E039_2_TssAFlnk.bed	1	0.897	1	0.251	1	1	1	2.87e-05	1	1	5.59e-05	0.132	1	1	0.115	0.632	0.304	1	1	0.0499	0.224	1	1	1	0.00518	2.6e-06	1	1	0.24	1	0.0857	1	1	1	1	1	0.401	0.137	1	1	1	1	1	1	0.0333	0.899	1	1	1
E039_Primary_T_helper_naive_cells_from_peripheral_blood_Blood_erc2-chromatin15state-all-files/E039_3_TxFlnk.bed	1	1	1	0.871	1	1	1	0.25	1	1	1	0.222	1	1	1	1	1	1	0.723	1	0.583	1	0.407	1	1	0.422	1	1	0.905	0.949	0.325	1	1	1	1	1	0.539	0.0407	1	0.643	0.253	1	1	1	0.936	1	1	1	0.14
E039_Primary_T_helper_naive_cells_from_peripheral_blood_Blood_erc2-chromatin15state-all-files/E039_4_Tx.bed	1	1	1	1	1	1	1	0.0521	1	1	1	0.152	1	1	0.298	1	0.465	1	1	1	0.907	1	0.407	1	0.282	0.906	1	0.419	0.164	1	0.382	1	0.906	1	0.376	1	0.0302	0.644	1	1	1	0.921	1	1	0.297	1	0.872	1	0.983
E039_Primary_T_helper_naive_cells_from_peripheral_blood_Blood_erc2-chromatin15state-all-files/E039_5_TxWk.bed	1	0.629	1	0.312	1	1	1	0.000376	0.857	1.38e-06	0.305	0.22	1	1	0.845	1	0.548	1	1	0.0248	0.00306	1	0.261	1	0.47	0.0301	0.585	1	0.608	1	0.11	1	0.54	1	1	1	0.000517	0.391	0.251	1	1	1	0.72	1	0.265	0.172	1	1	0.625
E039_Primary_T_helper_naive_cells_from_peripheral_blood_Blood_erc2-chromatin15state-all-files/E039_6_EnhG.bed	0.179	1	0.532	1	1	1	0.872	0.463	1	1	0.902	0.876	1	1	1	0.156	1	0.971	1	0.899	0.989	0.282	0.618	1	0.288	0.00375	1	1	0.856	1	0.545	1	0.0707	1	1	1	1	0.856	1	1	0.249	1	1	1	0.261	1	1	1	1
E039_Primary_T_helper_naive_cells_from_peripheral_blood_Blood_erc2-chromatin15state-all-files/E039_7_Enh.bed	1.67e-06	1	1	1	0.593	1	1	5.97e-06	0.537	0.612	8.03e-07	0.00242	1	1	0.816	1	0.958	1	1	0.0836	0.912	1	0.205	1	3.38e-06	8.76e-10	1	1	0.0148	1	1.72e-06	0.388	0.909	1	0.947	1	0.732	1	1	1	1	1	1	1	0.00291	0.162	0.756	1	0.118
E039_Primary_T_helper_naive_cells_from_peripheral_blood_Blood_erc2-chromatin15state-all-files/E039_8_ZNF-Rpts.bed	1	1	1	1	1	1	1	1	1	1	1	1	1	1	1	1	1	1	1	1	0.353	1	1	1	1	1	1	1	1	1	1	1	1	1	1	1	1	0.85	1	1	1	1	1	1	1	1	1	1	1
E039_Primary_T_helper_naive_cells_from_peripheral_blood_Blood_erc2-chromatin15state-all-files/E039_9_Het.bed	1	1	1	1	1	1	1	1	1	0.845	1	1	1	1	1	1	1	1	1	1	0.558	1	1	1	0.981	1	1	1	0.729	1	0.366	1	1	1	0.697	1	1	0.558	0.0544	1	1	1	1	1	1	1	1	1	1
E039_Primary_T_helper_naive_cells_from_peripheral_blood_Blood_erc2-chromatin15state-all-files/E039_10_TssBiv.bed	1	0.513	1	1	1	1	1	1	1	0.474	0.348	0.2	1	1	1	1	1	1	1	1	1	1	1	1	1	1	1	1	1	1	1	1	1	1	1	1	0.367	0.429	1	1	1	1	1	1	1	1	1	1	1
E039_Primary_T_helper_naive_cells_from_peripheral_blood_Blood_erc2-chromatin15state-all-files/E039_11_BivFlnk.bed	0.851	1	1	1	1	1	1	0.523	1	0.423	1	0.462	1	1	1	1	0.115	1	0.47	0.602	0.71	1	0.699	0.487	1	1	1	1	1	1	0.678	1	1	1	1	1	0.0315	1	1	0.437	1	0.00284	1	0.212	0.492	1	1	1	0.486
E039_Primary_T_helper_naive_cells_from_peripheral_blood_Blood_erc2-chromatin15state-all-files/E039_12_EnhBiv.bed	1	0.41	1	0.135	1	1	1	0.23	1	0.00668	0.968	0.0635	1	1	1	1	0.286	1	0.582	1	0.00306	1	0.917	1	0.817	1	0.0986	1	0.608	1	1	1	1	1	1	1	0.265	0.532	1	0.558	0.235	1	1	0.266	0.652	1	1	1	0.648
E039_Primary_T_helper_naive_cells_from_peripheral_blood_Blood_erc2-chromatin15state-all-files/E039_13_ReprPC.bed	1	0.0826	1	0.0206	1	1	0.749	1	1	0.0828	1	0.531	1	1	1	1	0.417	1	0.461	1	0.0581	0.878	0.59	0.523	0.911	1	0.197	1	1	1	1	1	0.637	1	1	1	0.0932	0.228	1	0.468	0.0561	1	1	0.897	1	1	0.83	1	0.807
E039_Primary_T_helper_naive_cells_from_peripheral_blood_Blood_erc2-chromatin15state-all-files/E039_14_ReprPCWk.bed	1	1	1	0.653	1	1	0.902	1	1	1	1	0.772	1	1	1	1	1	1	1	1	0.568	1	1	0.0896	1	1	1	1	1	0.00304	1	0.208	1	0.259	0.582	1	0.718	1	1	1	1	1	1	1	1	0.59	0.77	0.000121	1
E039_Primary_T_helper_naive_cells_from_peripheral_blood_Blood_erc2-chromatin15state-all-files/E039_15_Quies.bed	1	1	1	1	1	1	1	1	1	1	1	1	0.294	1	1	1	1	1	1	1	1	1	1	1	1	1	1	1	1	1	1	1	1	1	1	1	1	1	1	1	1	1	1	1	1	1	1	1	1
E040_Primary_T_helper_memory_cells_from_peripheral_blood_1_Blood_erc2-chromatin15state-all-files/E040_1_TssA.bed	1	1	1	0.525	1	0.912	0.466	0.142	1	0.368	0.105	0.00283	1	1	0.123	1	0.53	1	1	0.659	0.0281	1	1	1	0.391	0.151	1	1	0.752	1	0.0071	1	1	1	0.203	1	0.0748	0.144	0.218	1	0.0853	1	1	1	0.399	1	0.756	1	1
E040_Primary_T_helper_memory_cells_from_peripheral_blood_1_Blood_erc2-chromatin15state-all-files/E040_2_TssAFlnk.bed	0.68	0.33	1	0.26	1	1	1	0.0323	1	0.635	0.000348	0.237	1	1	0.971	1	0.463	1	1	0.0561	1	1	1	1	0.0401	0.0284	1	1	0.491	1	0.0427	1	1	1	1	1	0.425	0.105	1	1	1	1	1	1	0.802	0.973	1	1	1
E040_Primary_T_helper_memory_cells_from_peripheral_blood_1_Blood_erc2-chromatin15state-all-files/E040_3_TxFlnk.bed	0.382	1	1	1	1	1	1	1	1	1	1	1	1	1	1	1	1	1	1	1	1	1	0.552	1	1	1	1	1	1	0.244	1	1	1	1	1	1	0.587	1	1	1	1	1	1	1	1	1	1	1	1
E040_Primary_T_helper_memory_cells_from_peripheral_blood_1_Blood_erc2-chromatin15state-all-files/E040_4_Tx.bed	1	1	1	1	1	1	1	0.229	1	1	1	1	1	1	1	1	1	1	1	1	1	1	0.755	1	1	0.877	1	1	1	1	0.883	1	1	1	0.408	1	0.637	1	1	1	1	1	1	1	0.433	1	1	1	1
E040_Primary_T_helper_memory_cells_from_peripheral_blood_1_Blood_erc2-chromatin15state-all-files/E040_5_TxWk.bed	0.511	0.851	0.682	0.125	0.75	1	1	0.00213	0.0875	0.0106	0.0907	0.0398	1	1	0.206	0.991	0.0622	1	1	0.251	0.000182	1	0.291	1	0.0033	0.00632	1	0.812	0.643	1	0.00592	1	0.849	1	1	1	0.00829	0.742	1	1	1	1	1	1	0.579	0.0679	1	1	1
E040_Primary_T_helper_memory_cells_from_peripheral_blood_1_Blood_erc2-chromatin15state-all-files/E040_6_EnhG.bed	0.494	1	1	1	1	1	1	0.0389	1	1	0.439	0.205	1	1	0.812	1	1	0.897	1	1	1	1	0.861	1	0.564	0.064	1	1	0.525	1	0.0679	1	0.271	1	1	1	1	1	1	1	1	1	1	1	1	1	1	1	1
E040_Primary_T_helper_memory_cells_from_peripheral_blood_1_Blood_erc2-chromatin15state-all-files/E040_7_Enh.bed	4.14e-05	1	1	1	0.682	1	1	6.91e-07	0.0461	0.592	8.03e-07	0.0289	1	1	1	0.412	0.657	0.789	1	0.00115	0.889	1	0.504	1	4.88e-08	2.14e-16	1	1	0.0369	1	0.000198	1	0.939	1	0.936	0.791	0.895	1	1	1	1	1	1	1	2.35e-05	0.376	0.756	1	0.135
E040_Primary_T_helper_memory_cells_from_peripheral_blood_1_Blood_erc2-chromatin15state-all-files/E040_8_ZNF-Rpts.bed	1	1	1	1	1	1	1	1	1	1	1	1	1	1	1	1	1	1	1	1	0.868	1	1	1	1	1	1	1	1	1	0.369	1	1	1	1	1	1	0.961	1	1	1	1	1	1	1	1	1	1	1
E040_Primary_T_helper_memory_cells_from_peripheral_blood_1_Blood_erc2-chromatin15state-all-files/E040_9_Het.bed	1	1	1	1	1	1	0.162	1	1	0.735	1	1	1	1	1	1	1	1	0.743	1	1	1	1	1	0.447	0.93	1	1	0.996	1	0.778	1	1	1	1	1	1	0.734	0.352	1	1	1	1	1	1	1	1	1	1
E040_Primary_T_helper_memory_cells_from_peripheral_blood_1_Blood_erc2-chromatin15state-all-files/E040_10_TssBiv.bed	1	1	1	1	1	1	1	1	1	1	1	1	1	1	1	1	1	1	1	1	1	1	1	1	1	1	1	1	1	1	1	1	1	1	1	1	1	1	1	1	1	1	1	1	1	1	1	1	1
E040_Primary_T_helper_memory_cells_from_peripheral_blood_1_Blood_erc2-chromatin15state-all-files/E040_11_BivFlnk.bed	0.526	1	1	1	1	1	1	1	1	1	1	1	1	1	1	1	1	1	1	1	0.397	1	1	1	1	1	1	1	1	1	1	1	1	1	1	1	0.0975	0.471	1	1	1	1	1	1	1	1	1	1	1
E040_Primary_T_helper_memory_cells_from_peripheral_blood_1_Blood_erc2-chromatin15state-all-files/E040_12_EnhBiv.bed	1	0.00729	1	0.188	1	1	0.693	0.315	1	0.00459	1	0.104	1	1	1	1	0.105	1	0.163	1	0.00179	1	0.252	0.672	0.915	0.986	0.0223	1	0.729	1	0.475	1	1	1	1	1	0.366	0.101	1	0.114	0.033	1	1	0.0154	0.257	1	1	1	0.725
E040_Primary_T_helper_memory_cells_from_peripheral_blood_1_Blood_erc2-chromatin15state-all-files/E040_13_ReprPC.bed	1	0.55	1	0.136	1	1	1	1	1	0.143	1	0.0466	1	1	0.971	1	0.412	1	0.461	1	0.0552	1	0.386	0.52	1	1	0.0986	1	1	1	1	1	0.269	1	1	0.865	0.0483	1	1	0.437	0.277	0.793	1	1	1	1	0.819	1	0.113
E040_Primary_T_helper_memory_cells_from_peripheral_blood_1_Blood_erc2-chromatin15state-all-files/E040_14_ReprPCWk.bed	1	1	1	0.129	1	1	1	1	1	1	1	0.788	1	1	0.335	1	0.48	1	1	1	0.781	1	1	0.0877	1	1	1	1	1	0.443	1	1	1	1	0.684	1	1	0.907	1	1	1	1	1	1	1	1	0.383	0.0862	1
E040_Primary_T_helper_memory_cells_from_peripheral_blood_1_Blood_erc2-chromatin15state-all-files/E040_15_Quies.bed	1	1	1	1	1	1	1	1	1	1	1	1	0.556	0.902	1	1	1	1	1	1	1	1	1	1	1	1	1	1	1	1	1	1	1	1	1	0.681	1	1	0.509	1	1	1	1	1	1	1	1	1	1
E041_Primary_T_helper_cells_PMA-I_stimulated_Blood_erc2-chromatin15state-all-files/E041_1_TssA.bed	1	0.158	1	0.267	0.78	0.935	0.626	0.0906	1	0.842	1	0.00583	1	1	0.73	1	0.174	1	1	0.0497	0.214	1	0.618	1	0.53	0.106	0.65	1	0.51	1	0.000569	1	1	1	0.532	1	0.228	0.134	0.309	1	0.138	1	1	1	0.512	0.654	1	1	1
E041_Primary_T_helper_cells_PMA-I_stimulated_Blood_erc2-chromatin15state-all-files/E041_2_TssAFlnk.bed	0.368	1	0.782	0.986	1	1	1	3.55e-05	1	0.653	1.5e-05	0.375	1	1	0.673	0.425	0.871	0.186	1	0.0377	0.592	1	1	1	0.0087	3.01e-09	1	1	0.236	1	0.00917	1	0.635	1	1	1	0.2	0.628	1	1	1	1	1	1	0.405	1	0.857	1	1
E041_Primary_T_helper_cells_PMA-I_stimulated_Blood_erc2-chromatin15state-all-files/E041_3_TxFlnk.bed	0.435	1	1	0.898	1	1	1	0.242	1	0.455	4.34e-05	0.0225	1	1	1	1	1	1	0.743	0.445	0.933	1	1	0.766	0.0894	8.76e-10	1	1	0.943	1	0.0283	1	1	1	0.359	1	0.806	0.933	1	0.781	1	1	1	1	0.937	1	1	1	0.912
E041_Primary_T_helper_cells_PMA-I_stimulated_Blood_erc2-chromatin15state-all-files/E041_4_Tx.bed	1	1	1	1	1	1	1	0.0025	1	1	0.857	0.149	1	1	0.668	1	1	1	1	0.06	0.989	1	0.086	1	0.391	0.626	1	1	0.525	1	0.824	1	0.975	1	0.483	1	0.0137	0.614	1	1	1	1	1	1	0.297	1	1	1	1
E041_Primary_T_helper_cells_PMA-I_stimulated_Blood_erc2-chromatin15state-all-files/E041_5_TxWk.bed	1	1	1	0.209	1	1	1	0.0656	1	2.91e-06	0.149	0.0917	1	1	0.387	0.916	0.297	1	1	0.339	0.0071	1	0.719	1	0.0975	0.243	1	0.359	0.258	1	0.0247	1	0.4	1	1	1	0.00717	1	0.741	1	1	1	1	1	0.367	0.479	1	1	0.983
E041_Primary_T_helper_cells_PMA-I_stimulated_Blood_erc2-chromatin15state-all-files/E041_6_EnhG.bed	0.000467	1	1	1	1	1	1	0.206	1	1	0.595	0.583	1	1	1	0.689	1	1	1	1	1	1	0.327	1	0.267	0.00375	1	0.853	1	1	0.0149	1	0.0902	1	1	1	1	0.572	1	1	1	1	1	1	1	0.764	1	1	0.756
E041_Primary_T_helper_cells_PMA-I_stimulated_Blood_erc2-chromatin15state-all-files/E041_7_Enh.bed	0.000861	1	1	0.965	1	1	1	0.00027	0.000476	0.796	1.52e-06	0.299	1	1	0.545	1	0.286	1	1	0.279	0.131	1	0.863	1	3.64e-07	0.00075	1	1	0.0426	1	3.78e-06	0.422	1	1	0.739	1	0.837	1	1	1	0.848	1	1	1	0.000208	0.113	0.934	1	0.14
E041_Primary_T_helper_cells_PMA-I_stimulated_Blood_erc2-chromatin15state-all-files/E041_8_ZNF-Rpts.bed	1	1	1	1	1	1	1	1	1	0.849	1	1	1	1	1	1	1	1	1	1	1	1	1	1	1	1	1	1	1	1	1	1	1	1	0.736	1	1	0.673	1	1	1	1	1	1	1	1	1	1	1
E041_Primary_T_helper_cells_PMA-I_stimulated_Blood_erc2-chromatin15state-all-files/E041_9_Het.bed	1	1	1	1	1	1	0.272	1	1	1	1	1	1	1	1	1	1	1	0.889	1	0.327	1	1	1	0.927	1	1	1	1	1	0.779	1	1	1	1	1	1	0.967	0.518	1	0.276	1	1	1	1	1	1	1	1
E041_Primary_T_helper_cells_PMA-I_stimulated_Blood_erc2-chromatin15state-all-files/E041_10_TssBiv.bed	1	0.366	1	1	1	1	1	0.189	1	1	1	0.197	1	1	1	1	1	1	1	1	1	1	1	1	1	1	0.585	1	1	1	1	1	1	1	1	1	1	1	1	1	1	1	1	1	1	1	1	1	1
E041_Primary_T_helper_cells_PMA-I_stimulated_Blood_erc2-chromatin15state-all-files/E041_11_BivFlnk.bed	0.935	0.969	1	0.487	1	1	1	0.681	1	0.0202	1	0.561	1	1	1	1	0.0364	1	0.495	1	0.357	1	0.341	1	1	1	1	1	1	1	0.79	1	0.879	1	1	1	0.19	0.373	1	0.477	1	0.113	1	0.28	0.175	1	1	1	1
E041_Primary_T_helper_cells_PMA-I_stimulated_Blood_erc2-chromatin15state-all-files/E041_12_EnhBiv.bed	1	0.0986	1	0.226	1	1	0.825	0.463	1	0.0151	1	0.00583	1	1	1	1	0.47	1	0.743	0.934	4.25e-05	1	0.335	0.219	0.592	1	0.00701	1	0.803	1	1	1	1	1	0.638	1	0.162	0.0995	1	0.724	0.0614	0.199	1	0.0161	0.342	1	1	1	0.1
E041_Primary_T_helper_cells_PMA-I_stimulated_Blood_erc2-chromatin15state-all-files/E041_13_ReprPC.bed	1	0.276	1	0.0193	1	1	1	1	1	0.506	1	0.1	1	1	1	1	0.269	1	0.814	1	0.107	1	0.866	1	1	1	1	1	1	1	1	1	0.593	1	1	0.982	0.264	0.0757	1	0.765	0.594	1	1	1	1	0.347	1	1	0.668
E041_Primary_T_helper_cells_PMA-I_stimulated_Blood_erc2-chromatin15state-all-files/E041_14_ReprPCWk.bed	1	1	1	0.996	1	1	1	1	1	1	1	1	1	1	0.3	1	1	1	1	1	1	1	1	0.759	1	1	1	1	1	5.6e-06	1	0.208	1	0.313	0.483	1	1	1	1	1	1	1	1	1	1	1	0.452	0.00346	1
E041_Primary_T_helper_cells_PMA-I_stimulated_Blood_erc2-chromatin15state-all-files/E041_15_Quies.bed	1	0.85	1	1	1	1	1	1	1	1	1	1	0.106	1	1	1	1	1	1	1	1	1	1	1	1	1	1	1	1	1	1	1	1	1	1	1	1	1	1	1	1	1	1	1	1	1	1	1	1
E042_Primary_T_helper_17_cells_PMA-I_stimulated_Blood_erc2-chromatin15state-all-files/E042_1_TssA.bed	1	0.822	1	0.021	1	1	0.488	0.297	1	0.75	1	0.303	1	1	0.175	1	0.578	1	1	0.131	0.189	1	0.743	1	0.736	0.84	0.0458	1	1	1	0.0275	1	1	1	0.322	1	0.206	0.397	0.292	1	0.468	1	1	1	0.528	1	1	1	1
E042_Primary_T_helper_17_cells_PMA-I_stimulated_Blood_erc2-chromatin15state-all-files/E042_2_TssAFlnk.bed	0.851	1	1	1	1	1	1	0.0027	1	0.749	0.00152	0.046	1	1	1	1	0.824	0.0864	1	0.188	1	1	1	1	0.00489	3.06e-05	1	1	0.0897	1	0.0232	1	1	1	0.879	1	0.989	0.446	1	1	1	1	1	1	0.0983	0.802	0.526	1	1
E042_Primary_T_helper_17_cells_PMA-I_stimulated_Blood_erc2-chromatin15state-all-files/E042_3_TxFlnk.bed	0.512	0.823	0.374	0.562	1	0.873	1	0.151	1	1	0.00166	0.000595	1	1	0.548	0.386	0.554	1	0.975	0.32	0.429	0.799	0.798	1	0.00981	4.56e-07	1	1	0.449	1	9.04e-06	1	1	1	0.483	1	0.0712	0.32	0.769	0.993	0.47	1	1	1	1	0.232	0.765	1	0.738
E042_Primary_T_helper_17_cells_PMA-I_stimulated_Blood_erc2-chromatin15state-all-files/E042_4_Tx.bed	1	1	0.913	1	0.953	1	1	0.0707	1	1	0.913	0.299	1	1	0.634	1	1	1	1	0.446	1	1	0.0949	1	0.0275	0.873	1	0.834	0.251	1	0.871	1	0.545	1	0.322	1	0.0691	0.228	0.368	1	1	1	1	1	0.15	1	1	1	1
E042_Primary_T_helper_17_cells_PMA-I_stimulated_Blood_erc2-chromatin15state-all-files/E042_5_TxWk.bed	1	1	1	0.0817	1	1	1	0.0122	1	1.09e-05	0.0193	0.194	1	1	0.655	1	0.263	1	1	0.153	0.00908	1	0.413	1	0.0722	0.003	0.656	1	0.195	1	0.00117	1	0.243	1	1	1	0.00471	1	1	1	0.848	1	1	1	0.783	0.0701	1	1	1
E042_Primary_T_helper_17_cells_PMA-I_stimulated_Blood_erc2-chromatin15state-all-files/E042_6_EnhG.bed	0.0249	1	1	1	1	1	1	0.0246	1	1	0.0731	0.082	1	1	1	1	1	1	1	1	1	1	0.239	1	0.649	0.363	1	0.979	0.783	1	0.00171	1	0.274	1	1	1	0.547	1	0.537	1	1	1	1	1	0.843	1	1	1	1
E042_Primary_T_helper_17_cells_PMA-I_stimulated_Blood_erc2-chromatin15state-all-files/E042_7_Enh.bed	0.000203	1	1	1	0.593	1	1	4.94e-06	0.00491	0.352	0.000314	0.421	1	1	0.623	0.543	0.371	1	1	0.0521	0.0342	1	0.685	1	3.28e-07	2.3e-09	1	1	0.0588	1	0.0202	1	1	1	0.795	0.976	0.246	0.953	1	1	1	1	1	1	0.00393	0.654	1	1	0.191
E042_Primary_T_helper_17_cells_PMA-I_stimulated_Blood_erc2-chromatin15state-all-files/E042_8_ZNF-Rpts.bed	1	1	1	1	1	1	1	1	1	1	1	1	1	1	1	1	1	1	1	1	0.836	1	1	1	1	1	1	1	1	1	0.793	1	1	1	1	1	1	1	1	1	1	1	1	1	1	1	1	1	1
E042_Primary_T_helper_17_cells_PMA-I_stimulated_Blood_erc2-chromatin15state-all-files/E042_9_Het.bed	1	1	1	1	1	1	1	1	1	0.762	0.812	1	1	1	1	1	1	1	1	1	1	1	1	1	1	1	1	1	1	1	0.666	1	1	1	1	1	1	0.446	0.0651	1	1	1	1	1	1	1	1	1	1
E042_Primary_T_helper_17_cells_PMA-I_stimulated_Blood_erc2-chromatin15state-all-files/E042_10_TssBiv.bed	1	1	1	1	1	1	1	1	1	1	1	1	1	1	1	1	1	1	1	1	1	1	1	1	1	1	1	1	1	1	1	1	0.264	1	1	1	1	1	1	1	1	1	1	1	1	1	1	1	1
E042_Primary_T_helper_17_cells_PMA-I_stimulated_Blood_erc2-chromatin15state-all-files/E042_11_BivFlnk.bed	0.0988	1	1	1	1	1	1	1	1	1	1	1	1	1	1	1	0.366	1	1	1	0.0234	1	1	1	1	1	1	1	1	1	0.552	1	1	1	1	1	0.174	0.572	1	1	1	0.0704	1	0.155	1	1	1	1	1
E042_Primary_T_helper_17_cells_PMA-I_stimulated_Blood_erc2-chromatin15state-all-files/E042_12_EnhBiv.bed	1	0.444	0.59	0.00651	1	1	1	1	1	0.00288	1	0.0251	1	1	1	0.52	0.335	1	0.163	1	0.0759	0.38	0.242	1	0.911	1	0.145	1	0.681	1	0.43	1	1	1	0.552	1	0.147	0.271	1	0.114	0.245	1	1	0.335	0.69	1	1	1	1
E042_Primary_T_helper_17_cells_PMA-I_stimulated_Blood_erc2-chromatin15state-all-files/E042_13_ReprPC.bed	1	0.219	1	0.0545	1	1	0.265	0.255	1	0.507	1	0.252	1	1	0.997	1	0.463	1	0.62	1	0.0841	0.916	1	0.256	1	0.896	0.581	0.738	1	1	1	1	0.928	1	1	1	0.262	0.458	1	0.628	0.0938	1	1	0.229	0.752	0.209	0.709	1	0.0435
E042_Primary_T_helper_17_cells_PMA-I_stimulated_Blood_erc2-chromatin15state-all-files/E042_14_ReprPCWk.bed	1	1	1	0.138	1	0.728	0.509	1	1	1	1	0.62	1	1	0.181	1	1	1	1	1	0.339	1	1	1	1	1	0.782	1	1	0.00123	1	1	1	1	0.107	1	0.876	1	1	1	1	1	1	1	1	0.431	0.971	0.0551	0.613
E042_Primary_T_helper_17_cells_PMA-I_stimulated_Blood_erc2-chromatin15state-all-files/E042_15_Quies.bed	1	0.76	1	1	1	1	1	1	1	1	1	1	0.192	1	1	1	1	1	1	1	1	1	1	1	1	1	1	1	1	1	1	1	1	1	1	1	1	1	1	1	1	1	1	1	1	1	1	1	1
E043_Primary_T_helper_cells_from_peripheral_blood_Blood_erc2-chromatin15state-all-files/E043_1_TssA.bed	1	0.621	1	0.122	1	0.854	0.872	0.16	1	0.183	0.886	0.0119	1	1	1	1	0.661	1	1	0.152	0.012	1	0.568	1	1	0.324	0.784	1	0.585	1	0.037	1	1	1	0.322	1	0.367	0.228	0.0204	1	0.0382	1	1	1	0.252	0.713	1	1	0.478
E043_Primary_T_helper_cells_from_peripheral_blood_Blood_erc2-chromatin15state-all-files/E043_2_TssAFlnk.bed	0.669	1	1	0.471	1	1	1	0.00226	1	1	8.08e-05	0.0498	1	1	0.0599	1	0.363	1	1	0.0245	0.438	1	1	1	0.0216	0.00332	1	1	0.308	1	0.0016	1	0.565	1	0.641	1	0.0772	0.109	1	1	1	1	1	1	0.351	0.731	0.617	1	1
E043_Primary_T_helper_cells_from_peripheral_blood_Blood_erc2-chromatin15state-all-files/E043_3_TxFlnk.bed	0.631	1	1	1	1	1	1	0.473	1	0.805	1	0.426	1	1	1	1	1	1	0.461	1	1	1	0.655	1	1	0.175	0.996	1	0.536	0.339	0.65	1	1	1	1	1	0.767	1	1	0.458	1	1	1	1	1	1	1	1	0.454
E043_Primary_T_helper_cells_from_peripheral_blood_Blood_erc2-chromatin15state-all-files/E043_4_Tx.bed	1	1	1	1	1	1	1	0.064	1	0.84	1	0.562	1	1	0.983	1	0.923	1	1	0.66	1	1	0.0364	1	0.336	0.454	1	0.594	0.326	1	0.895	1	0.437	1	0.565	1	0.0215	0.86	1	1	1	1	1	1	0.15	1	1	1	1
E043_Primary_T_helper_cells_from_peripheral_blood_Blood_erc2-chromatin15state-all-files/E043_5_TxWk.bed	1	0.301	1	0.22	1	1	1	0.000153	0.637	5.49e-06	0.156	0.0273	1	1	0.845	0.889	0.0937	1	1	0.117	0.00247	1	0.496	1	0.206	0.276	1	1	0.703	1	0.0283	1	0.315	1	1	1	0.0209	0.854	1	1	1	1	0.72	1	0.199	0.296	1	1	0.624
E043_Primary_T_helper_cells_from_peripheral_blood_Blood_erc2-chromatin15state-all-files/E043_6_EnhG.bed	0.311	1	1	1	1	1	1	0.0141	1	1	0.267	0.342	1	1	0.516	1	1	1	1	1	0.951	1	0.443	1	0.56	0.0118	1	1	0.731	1	0.00161	1	0.264	1	1	1	1	0.14	1	1	1	1	1	1	0.481	1	1	1	0.707
E043_Primary_T_helper_cells_from_peripheral_blood_Blood_erc2-chromatin15state-all-files/E043_7_Enh.bed	2.03e-07	1	1	1	0.685	1	1	5.97e-06	0.0479	0.641	1.16e-07	0.0479	1	1	1	0.649	0.482	0.864	1	0.0521	0.663	1	0.728	1	1.34e-08	4.59e-14	1	1	0.0111	1	2.6e-05	0.97	1	1	0.99	1	0.257	1	0.777	1	1	1	1	1	0.00434	0.0149	0.957	1	0.1
E043_Primary_T_helper_cells_from_peripheral_blood_Blood_erc2-chromatin15state-all-files/E043_8_ZNF-Rpts.bed	1	1	1	1	1	1	1	1	1	1	1	1	1	1	1	1	1	1	1	1	0.687	1	1	1	1	1	0.495	1	1	1	0.645	1	1	1	1	1	1	1	1	1	1	1	1	1	1	1	1	1	1
E043_Primary_T_helper_cells_from_peripheral_blood_Blood_erc2-chromatin15state-all-files/E043_9_Het.bed	1	1	1	1	1	1	0.788	1	1	1	1	1	1	1	1	1	1	1	1	1	0.766	1	1	1	0.968	1	1	1	0.888	1	0.692	1	1	1	0.521	1	1	0.714	0.823	1	1	1	1	1	1	1	1	1	1
E043_Primary_T_helper_cells_from_peripheral_blood_Blood_erc2-chromatin15state-all-files/E043_10_TssBiv.bed	1	1	1	1	1	1	1	1	1	1	1	1	1	1	1	1	1	1	1	1	1	1	1	1	1	1	1	1	1	1	1	1	1	1	1	1	1	0.239	1	1	1	1	1	1	1	1	1	1	1
E043_Primary_T_helper_cells_from_peripheral_blood_Blood_erc2-chromatin15state-all-files/E043_11_BivFlnk.bed	1	0.337	1	1	1	1	1	0.637	1	0.00259	1	0.148	1	1	1	1	0.0264	1	0.5	1	0.0194	1	0.782	1	1	1	0.506	1	1	1	1	1	0.825	1	1	1	0.407	1	1	0.468	1	1	1	0.28	0.56	1	1	1	1
E043_Primary_T_helper_cells_from_peripheral_blood_Blood_erc2-chromatin15state-all-files/E043_12_EnhBiv.bed	1	0.243	0.682	0.756	1	1	0.29	1	1	0.237	1	0.4	1	1	1	0.638	0.156	1	0.719	0.93	0.00553	0.392	0.581	0.182	0.233	1	0.11	1	0.768	1	0.572	1	1	1	0.637	1	0.00527	0.0668	1	0.744	0.0535	0.154	1	0.0182	0.827	1	1	1	0.1
E043_Primary_T_helper_cells_from_peripheral_blood_Blood_erc2-chromatin15state-all-files/E043_13_ReprPC.bed	1	0.245	1	0.00955	1	1	1	1	1	0.271	1	0.218	1	1	1	1	0.473	1	0.714	1	0.0604	1	0.878	0.783	1	1	0.982	0.979	1	0.916	1	1	0.232	0.711	0.607	1	0.767	0.357	1	0.724	0.47	1	1	1	1	0.67	0.78	0.445	1
E043_Primary_T_helper_cells_from_peripheral_blood_Blood_erc2-chromatin15state-all-files/E043_14_ReprPCWk.bed	1	1	1	0.393	1	1	0.9	1	1	1	1	1	1	1	0.241	1	1	1	1	1	1	1	1	1	1	1	1	0.834	1	3.25e-05	1	0.445	1	0.957	0.389	1	0.947	1	0.438	1	1	1	1	1	1	1	1	0.0265	0.522
E043_Primary_T_helper_cells_from_peripheral_blood_Blood_erc2-chromatin15state-all-files/E043_15_Quies.bed	1	1	1	1	1	1	1	1	1	1	1	1	0.469	0.328	1	1	1	1	1	1	1	1	1	1	1	1	1	1	1	1	1	1	1	1	1	0.937	1	1	1	1	1	1	1	1	1	1	1	1	1
E044_Primary_T_regulatory_cells_from_peripheral_blood_Blood_erc2-chromatin15state-all-files/E044_1_TssA.bed	1	1	1	1	1	1	1	0.307	1	0.0795	0.626	0.299	1	1	0.163	0.911	0.495	1	1	0.249	0.557	1	0.723	1	1	0.241	0.243	1	0.412	1	0.0484	1	1	1	0.447	1	0.0517	0.0668	0.311	1	0.116	1	1	1	0.414	1	1	1	1
E044_Primary_T_regulatory_cells_from_peripheral_blood_Blood_erc2-chromatin15state-all-files/E044_2_TssAFlnk.bed	0.278	0.847	1	0.0997	1	1	1	0.000291	1	1	1.1e-05	0.221	1	1	0.159	1	0.162	1	1	0.000386	0.466	1	1	1	0.00136	0.00113	1	1	0.251	1	0.00136	1	1	1	1	1	0.986	0.297	1	1	1	1	1	1	0.147	0.406	0.77	1	1
E044_Primary_T_regulatory_cells_from_peripheral_blood_Blood_erc2-chromatin15state-all-files/E044_3_TxFlnk.bed	0.398	1	1	1	1	0.685	1	0.00299	1	0.835	1	0.00474	1	1	1	1	1	0.511	0.593	1	1	1	1	1	0.6	0.00358	1	1	0.827	0.893	0.0848	1	1	1	0.213	1	0.264	0.715	0.506	0.628	1	1	1	1	0.297	1	1	1	0.761
E044_Primary_T_regulatory_cells_from_peripheral_blood_Blood_erc2-chromatin15state-all-files/E044_4_Tx.bed	1	1	1	1	1	1	1	0.0199	1	1	0.991	0.815	1	1	0.809	1	0.793	1	1	0.65	0.854	1	0.17	1	0.118	0.666	1	0.773	0.903	1	0.777	1	0.545	1	0.84	1	0.0473	0.645	1	1	1	1	1	1	0.519	1	1	1	1
E044_Primary_T_regulatory_cells_from_peripheral_blood_Blood_erc2-chromatin15state-all-files/E044_5_TxWk.bed	1	0.664	1	0.044	1	1	1	0.0108	0.29	9.5e-06	0.0437	0.269	1	1	0.229	1	0.757	1	1	0.203	0.00959	1	0.105	1	0.0509	0.000599	0.239	1	0.0969	1	5e-06	1	1	1	1	1	0.00108	0.85	1	1	1	1	1	1	0.224	0.307	1	1	0.63
E044_Primary_T_regulatory_cells_from_peripheral_blood_Blood_erc2-chromatin15state-all-files/E044_6_EnhG.bed	0.453	1	1	1	1	1	0.906	0.129	1	1	0.0306	0.0173	1	1	1	1	1	0.0953	1	1	1	0.944	0.655	1	0.966	0.049	1	1	0.287	1	0.573	1	0.315	1	1	0.868	1	0.752	0.397	1	1	1	1	1	0.133	1	1	1	0.836
E044_Primary_T_regulatory_cells_from_peripheral_blood_Blood_erc2-chromatin15state-all-files/E044_7_Enh.bed	0.000333	1	1	1	1	1	1	0.00749	0.398	0.721	0.00649	0.0783	1	1	1	1	0.695	1	1	0.182	0.819	1	1	1	2.13e-07	1.99e-09	1	1	0.069	1	0.00107	1	1	1	1	0.953	0.127	1	1	1	1	1	1	1	0.0155	1	1	1	0.413
E044_Primary_T_regulatory_cells_from_peripheral_blood_Blood_erc2-chromatin15state-all-files/E044_8_ZNF-Rpts.bed	1	1	1	1	1	1	1	1	1	1	1	0.951	1	1	1	1	0.958	1	1	1	0.716	1	1	1	1	1	1	1	1	1	0.636	1	1	1	1	1	1	1	1	1	1	1	1	1	1	1	1	1	1
E044_Primary_T_regulatory_cells_from_peripheral_blood_Blood_erc2-chromatin15state-all-files/E044_9_Het.bed	1	1	1	1	1	1	1	1	1	1	1	1	1	1	1	1	1	1	1	1	1	1	1	1	1	1	1	1	1	1	1	1	1	1	1	0.425	1	0.798	0.27	1	1	1	1	1	1	1	1	1	1
E044_Primary_T_regulatory_cells_from_peripheral_blood_Blood_erc2-chromatin15state-all-files/E044_10_TssBiv.bed	1	1	1	1	1	1	1	0.31	1	1	0.613	0.248	1	1	1	1	0.359	1	1	1	0.44	1	0.463	1	1	1	0.783	1	1	1	0.406	1	1	1	1	1	1	1	0.107	1	1	1	1	0.133	0.268	1	1	1	1
E044_Primary_T_regulatory_cells_from_peripheral_blood_Blood_erc2-chromatin15state-all-files/E044_11_BivFlnk.bed	0.368	0.189	1	1	1	1	1	0.812	1	0.0147	1	0.0228	1	1	1	1	0.689	1	1	0.791	0.00363	1	0.413	1	1	0.939	0.793	1	1	1	0.868	1	0.916	1	1	1	0.294	0.876	1	1	1	0.163	1	1	0.677	1	0.765	1	0.687
E044_Primary_T_regulatory_cells_from_peripheral_blood_Blood_erc2-chromatin15state-all-files/E044_12_EnhBiv.bed	1	0.371	1	0.00574	0.0909	1	1	0.644	1	0.602	0.989	0.221	1	1	1	1	0.267	1	0.176	1	0.0115	1	0.912	1	0.375	1	0.0986	1	0.637	1	1	1	1	1	1	0.687	0.549	0.0054	1	0.114	0.0241	0.137	1	0.2	0.632	1	1	1	1
E044_Primary_T_regulatory_cells_from_peripheral_blood_Blood_erc2-chromatin15state-all-files/E044_13_ReprPC.bed	1	0.235	1	0.0997	1	1	0.948	1	1	0.035	1	0.0589	1	1	1	1	0.183	1	0.824	0.567	0.00134	1	0.894	0.435	0.768	1	0.136	0.32	0.973	1	1	1	0.7	1	0.476	1	0.0441	0.62	1	0.802	0.587	1	1	1	1	0.00587	0.708	1	0.0868
E044_Primary_T_regulatory_cells_from_peripheral_blood_Blood_erc2-chromatin15state-all-files/E044_14_ReprPCWk.bed	1	1	1	0.0336	1	0.912	0.976	1	1	0.789	1	0.566	1	1	0.109	1	0.633	1	1	1	1	0.824	1	1	1	1	1	1	1	0.00233	1	0.208	1	0.962	0.331	1	0.565	0.945	1	1	1	1	1	1	0.361	1	0.756	0.4	0.486
E044_Primary_T_regulatory_cells_from_peripheral_blood_Blood_erc2-chromatin15state-all-files/E044_15_Quies.bed	1	0.55	1	1	1	1	1	1	1	1	1	1	0.62	0.328	1	1	1	1	1	1	1	1	1	1	1	1	1	1	1	1	1	1	1	1	1	1	1	1	1	1	1	1	1	1	1	1	1	1	1
E045_Primary_T_cells_effector/memory_enriched_from_peripheral_blood_Blood_erc2-chromatin15state-all-files/E045_1_TssA.bed	1	0.293	1	0.0257	1	1	0.852	0.248	1	0.191	0.00275	0.00578	1	1	0.914	1	0.871	1	1	0.0966	0.211	1	0.403	1	0.337	0.243	0.35	1	0.236	1	0.00568	1	1	1	0.188	1	0.206	0.0054	0.215	1	0.187	1	1	1	0.0448	1	0.872	1	1
E045_Primary_T_cells_effector/memory_enriched_from_peripheral_blood_Blood_erc2-chromatin15state-all-files/E045_2_TssAFlnk.bed	0.246	1	1	1	1	1	1	0.00282	1	1	0.00268	0.232	1	1	0.181	1	0.158	0.553	1	0.251	0.224	1	1	1	0.0941	0.00377	1	1	0.184	1	0.253	1	1	1	1	1	0.316	0.483	0.983	1	1	0.991	1	1	0.369	0.806	0.607	1	1
E045_Primary_T_cells_effector/memory_enriched_from_peripheral_blood_Blood_erc2-chromatin15state-all-files/E045_3_TxFlnk.bed	1	1	1	1	1	1	1	1	1	0.721	0.728	0.389	1	1	1	1	1	1	0.446	1	1	1	1	1	1	0.145	1	1	1	0.26	0.175	1	1	1	1	1	0.693	1	1	0.437	1	1	1	1	1	1	1	1	0.454
E045_Primary_T_cells_effector/memory_enriched_from_peripheral_blood_Blood_erc2-chromatin15state-all-files/E045_4_Tx.bed	1	1	1	1	1	1	1	0.0955	1	0.953	1	0.282	1	1	1	1	1	1	1	1	0.711	1	0.125	1	0.0906	0.559	1	0.597	0.461	1	0.863	1	0.35	1	0.438	1	0.0674	0.87	1	1	1	1	1	1	0.0828	1	1	1	0.983
E045_Primary_T_cells_effector/memory_enriched_from_peripheral_blood_Blood_erc2-chromatin15state-all-files/E045_5_TxWk.bed	1	1	1	0.0766	0.762	1	1	0.000751	0.272	0.00145	0.0657	0.116	1	1	0.0361	0.678	0.338	1	1	0.116	0.00134	1	0.125	1	0.118	0.000824	0.361	1	0.318	1	0.00659	1	0.315	1	1	1	0.00226	0.688	1	1	1	1	1	1	0.457	0.441	1	1	1
E045_Primary_T_cells_effector/memory_enriched_from_peripheral_blood_Blood_erc2-chromatin15state-all-files/E045_6_EnhG.bed	1	1	1	1	1	1	1	0.063	1	0.994	0.819	0.269	1	1	1	1	1	1	1	0.398	1	1	1	1	0.762	0.738	1	1	0.922	1	0.034	1	1	1	1	0.865	1	0.694	0.847	1	1	1	1	1	1	1	1	1	1
E045_Primary_T_cells_effector/memory_enriched_from_peripheral_blood_Blood_erc2-chromatin15state-all-files/E045_7_Enh.bed	1.71e-06	1	0.374	1	1	1	1	2.34e-05	1	0.739	4.09e-05	0.0182	1	1	0.893	0.543	1	1	1	0.0702	0.954	1	1	1	1.69e-08	1.99e-09	1	1	0.0546	1	2.04e-06	1	1	1	0.935	0.231	0.547	1	0.487	1	1	1	1	1	0.00291	0.000119	1	1	0.351
E045_Primary_T_cells_effector/memory_enriched_from_peripheral_blood_Blood_erc2-chromatin15state-all-files/E045_8_ZNF-Rpts.bed	1	1	1	1	1	1	1	1	1	1	1	1	1	1	1	1	1	1	1	1	0.854	1	1	1	1	1	1	1	1	1	1	1	1	1	1	1	0.984	1	1	1	1	1	1	1	1	1	1	1	1
E045_Primary_T_cells_effector/memory_enriched_from_peripheral_blood_Blood_erc2-chromatin15state-all-files/E045_9_Het.bed	1	1	0.859	1	1	1	1	1	1	1	1	1	1	1	1	0.985	1	1	1	1	0.55	1	1	1	0.564	1	1	1	1	1	0.331	1	1	1	1	1	1	0.58	0.512	1	1	1	1	1	1	1	1	1	1
E045_Primary_T_cells_effector/memory_enriched_from_peripheral_blood_Blood_erc2-chromatin15state-all-files/E045_10_TssBiv.bed	1	1	1	1	1	1	1	1	1	1	1	1	1	1	1	1	0.0331	1	1	1	1	1	1	1	1	1	1	1	1	1	0.355	1	1	1	1	1	1	0.471	1	1	1	1	1	1	1	1	1	1	1
E045_Primary_T_cells_effector/memory_enriched_from_peripheral_blood_Blood_erc2-chromatin15state-all-files/E045_11_BivFlnk.bed	0.137	0.214	1	1	1	1	1	0.392	1	0.0729	1	0.061	1	1	1	1	1	1	1	1	1	1	1	1	1	1	1	1	1	1	1	1	0.623	1	1	1	0.048	1	1	1	1	1	1	0.133	1	1	1	1	1
E045_Primary_T_cells_effector/memory_enriched_from_peripheral_blood_Blood_erc2-chromatin15state-all-files/E045_12_EnhBiv.bed	1	0.826	1	0.409	1	1	1	0.571	1	0.0359	1	0.515	1	1	1	1	0.567	1	0.113	1	0.00392	1	0.742	1	1	1	0.0115	1	0.495	1	0.698	1	1	1	1	1	0.115	0.351	1	0.0652	1	1	1	0.229	0.535	1	0.685	1	0.131
E045_Primary_T_cells_effector/memory_enriched_from_peripheral_blood_Blood_erc2-chromatin15state-all-files/E045_13_ReprPC.bed	1	0.0838	1	0.0425	1	1	0.468	1	1	0.333	1	0.155	1	1	1	1	0.0575	1	0.971	1	0.0404	1	0.261	0.0623	1	1	0.978	1	1	1	1	1	1	1	0.812	0.251	0.202	0.457	1	0.868	0.0023	0.296	1	1	1	1	1	1	0.502
E045_Primary_T_cells_effector/memory_enriched_from_peripheral_blood_Blood_erc2-chromatin15state-all-files/E045_14_ReprPCWk.bed	1	1	1	0.0235	1	1	0.786	1	1	1	1	0.299	1	1	0.25	1	0.945	1	1	1	0.63	0.677	1	0.328	1	1	1	0.548	1	1	1	1	1	0.185	0.107	1	0.373	1	1	1	1	1	1	0.371	0.608	0.266	1	1	0.209
E045_Primary_T_cells_effector/memory_enriched_from_peripheral_blood_Blood_erc2-chromatin15state-all-files/E045_15_Quies.bed	1	1	1	1	1	1	1	1	1	1	1	1	0.6	0.492	1	1	1	1	1	1	1	1	1	1	1	1	1	1	1	0.823	1	1	1	1	1	1	1	1	1	1	1	1	1	1	1	1	1	1	1
E046_Primary_Natural_Killer_cells_from_peripheral_blood_Blood_erc2-chromatin15state-all-files/E046_1_TssA.bed	1	0.638	1	1	1	0.912	1	0.107	1	0.614	0.966	0.0682	1	1	1	1	0.207	1	1	0.567	0.0641	1	1	1	0.319	0.0301	0.625	1	0.723	1	0.00114	1	1	1	0.455	1	0.566	0.128	0.131	1	0.126	1	1	1	0.712	1	1	1	1
E046_Primary_Natural_Killer_cells_from_peripheral_blood_Blood_erc2-chromatin15state-all-files/E046_2_TssAFlnk.bed	0.662	1	1	0.17	1	1	1	1.7e-05	1	0.368	0.0464	0.207	1	1	0.0226	1	0.806	1	1	0.00185	0.569	1	1	1	0.34	0.0332	1	1	0.194	1	0.121	1	1	1	0.637	1	0.158	0.0803	0.769	1	1	1	1	1	0.00952	1	0.607	1	1
E046_Primary_Natural_Killer_cells_from_peripheral_blood_Blood_erc2-chromatin15state-all-files/E046_3_TxFlnk.bed	0.589	1	1	1	1	1	1	1	1	1	0.139	0.421	1	1	1	1	0.513	1	1	1	1	1	0.716	1	1	0.191	1	1	1	0.405	0.631	1	1	1	1	1	0.771	0.746	0.373	1	1	1	1	1	1	1	1	1	0.473
E046_Primary_Natural_Killer_cells_from_peripheral_blood_Blood_erc2-chromatin15state-all-files/E046_4_Tx.bed	1	1	1	1	1	1	1	0.178	1	0.153	0.819	0.529	1	1	0.589	1	1	1	1	0.817	0.62	1	0.0963	1	0.267	0.436	1	0.245	0.961	1	0.0624	1	0.335	1	0.701	1	0.00908	0.288	1	1	1	1	1	1	0.316	1	1	1	1
E046_Primary_Natural_Killer_cells_from_peripheral_blood_Blood_erc2-chromatin15state-all-files/E046_5_TxWk.bed	1	0.755	1	0.466	1	1	1	9.74e-07	1	7.96e-05	0.00805	0.511	1	1	1	1	0.528	1	1	0.229	0.0484	1	0.399	1	0.335	0.0169	0.425	1	0.0136	1	3.05e-05	1	0.511	1	1	1	0.000371	0.961	1	1	1	1	1	1	0.0828	0.266	1	1	0.562
E046_Primary_Natural_Killer_cells_from_peripheral_blood_Blood_erc2-chromatin15state-all-files/E046_6_EnhG.bed	0.152	1	1	1	0.992	1	1	0.00173	1	1	0.0644	0.205	1	1	0.3	1	1	0.0864	1	0.333	1	1	0.351	1	0.407	0.003	1	1	0.262	1	0.014	1	0.987	1	1	0.57	0.844	0.719	0.648	1	1	1	1	1	0.16	1	1	1	1
E046_Primary_Natural_Killer_cells_from_peripheral_blood_Blood_erc2-chromatin15state-all-files/E046_7_Enh.bed	1.22e-05	1	1	1	1	1	1	0.00011	0.00277	0.195	7.77e-05	0.0022	1	1	1	0.425	0.341	1	1	0.306	0.00626	1	0.971	1	1.34e-08	1.32e-08	1	1	0.053	1	2.27e-06	0.352	0.781	1	1	0.177	0.628	1	0.422	1	1	1	1	1	5.7e-05	0.671	1	1	0.212
E046_Primary_Natural_Killer_cells_from_peripheral_blood_Blood_erc2-chromatin15state-all-files/E046_8_ZNF-Rpts.bed	1	1	1	1	1	1	1	1	1	1	1	1	1	1	1	1	1	1	1	1	0.545	1	1	1	0.93	1	1	1	0.671	1	1	1	1	1	1	1	1	0.998	1	1	1	1	1	1	1	1	1	1	1
E046_Primary_Natural_Killer_cells_from_peripheral_blood_Blood_erc2-chromatin15state-all-files/E046_9_Het.bed	1	1	1	1	1	1	0.29	1	1	1	1	1	1	1	1	1	1	1	1	1	1	1	1	1	1	1	1	1	1	1	1	1	1	1	1	0.338	1	0.694	0.29	1	1	1	1	1	1	1	1	1	1
E046_Primary_Natural_Killer_cells_from_peripheral_blood_Blood_erc2-chromatin15state-all-files/E046_10_TssBiv.bed	1	0.293	1	1	1	1	1	1	1	1	1	0.121	1	1	1	1	0.144	1	1	1	0.155	1	1	1	1	1	1	1	1	1	1	1	1	1	1	1	1	1	1	1	1	1	1	1	1	1	1	1	1
E046_Primary_Natural_Killer_cells_from_peripheral_blood_Blood_erc2-chromatin15state-all-files/E046_11_BivFlnk.bed	1	0.802	1	1	1	1	1	1	1	0.444	1	0.113	1	1	1	1	0.116	1	0.478	1	0.689	1	0.252	1	0.654	1	0.114	1	1	1	1	1	1	1	1	1	0.107	1	1	0.468	1	0.00277	1	1	1	1	1	1	1
E046_Primary_Natural_Killer_cells_from_peripheral_blood_Blood_erc2-chromatin15state-all-files/E046_12_EnhBiv.bed	1	0.957	0.682	0.0369	1	1	0.902	1	1	0.0468	1	0.15	1	1	1	0.632	1	1	1	1	0.00596	1	0.863	0.92	0.226	1	0.656	1	0.931	1	0.237	1	1	1	0.75	0.937	0.62	0.23	1	1	1	1	1	0.00356	0.518	0.00416	1	1	0.979
E046_Primary_Natural_Killer_cells_from_peripheral_blood_Blood_erc2-chromatin15state-all-files/E046_13_ReprPC.bed	1	0.201	1	0.0398	1	1	0.819	1	1	0.385	1	0.184	1	1	1	1	0.132	1	0.314	1	0.0222	1	0.566	0.672	1	1	0.646	1	1	1	1	1	1	1	1	1	0.0608	0.631	1	0.269	0.212	1	1	1	1	0.195	0.774	1	0.33
E046_Primary_Natural_Killer_cells_from_peripheral_blood_Blood_erc2-chromatin15state-all-files/E046_14_ReprPCWk.bed	1	1	1	0.0538	1	0.791	0.652	1	1	0.843	1	1	1	1	0.551	1	1	1	1	1	0.89	1	1	0.526	1	1	1	0.971	1	0.00182	1	1	1	1	0.483	1	0.988	0.846	1	1	1	1	1	1	1	1	1	0.0324	0.406
E046_Primary_Natural_Killer_cells_from_peripheral_blood_Blood_erc2-chromatin15state-all-files/E046_15_Quies.bed	1	1	1	1	1	1	1	1	1	1	1	1	0.504	1	1	1	1	1	1	1	1	1	1	1	1	1	1	1	1	1	1	1	1	1	1	1	1	1	0.971	1	1	1	1	1	1	1	1	1	1
E047_Primary_T_CD8+_naive_cells_from_peripheral_blood_Blood_erc2-chromatin15state-all-files/E047_1_TssA.bed	1	0.301	1	0.0338	1	0.927	0.541	0.0906	1	0.198	0.811	0.00518	1	1	0.162	1	0.636	1	1	0.00732	0.2	1	0.248	1	0.767	0.409	0.0677	1	0.83	1	0.0903	1	1	1	0.107	1	0.143	0.228	0.0719	1	0.111	1	1	1	0.48	1	0.78	1	1
E047_Primary_T_CD8+_naive_cells_from_peripheral_blood_Blood_erc2-chromatin15state-all-files/E047_2_TssAFlnk.bed	0.644	1	0.59	1	1	1	1	0.0052	1	1	0.0146	0.172	1	1	0.241	0.52	0.897	0.0984	1	0.111	0.683	1	1	1	0.256	0.000592	1	1	0.22	1	0.0223	1	0.839	1	1	1	0.3	0.156	1	1	1	1	1	1	0.414	0.901	0.871	1	1
E047_Primary_T_CD8+_naive_cells_from_peripheral_blood_Blood_erc2-chromatin15state-all-files/E047_3_TxFlnk.bed	1	1	1	1	1	1	1	0.291	1	1	1	0.0354	1	1	1	1	1	1	1	1	1	1	1	1	1	1	1	1	1	0.23	1	1	1	1	1	1	1	1	1	1	1	1	1	1	0.277	1	1	1	1
E047_Primary_T_CD8+_naive_cells_from_peripheral_blood_Blood_erc2-chromatin15state-all-files/E047_4_Tx.bed	1	1	0.992	1	1	1	1	0.00689	1	1	1	1	1	1	1	1	1	1	1	0.999	1	1	0.308	1	1	1	1	0.473	1	1	0.819	1	1	1	0.199	1	0.723	1	1	1	1	1	1	1	0.442	1	1	1	1
E047_Primary_T_CD8+_naive_cells_from_peripheral_blood_Blood_erc2-chromatin15state-all-files/E047_5_TxWk.bed	0.489	1	1	0.0929	0.752	1	1	0.0117	1	0.000203	0.0014	0.0104	1	1	0.198	1	0.459	1	1	0.106	0.0019	1	0.112	1	0.0509	0.044	0.389	1	0.00418	1	0.0442	1	0.183	1	1	0.937	0.000324	0.752	1	1	1	1	1	1	0.178	0.396	0.78	1	0.955
E047_Primary_T_CD8+_naive_cells_from_peripheral_blood_Blood_erc2-chromatin15state-all-files/E047_6_EnhG.bed	1	1	1	1	1	1	1	0.377	1	0.837	0.912	0.726	1	1	1	1	1	1	0.798	1	1	1	1	1	0.915	0.00659	1	1	1	1	0.0817	1	0.315	1	1	0.983	0.693	0.674	1	0.818	1	1	1	1	1	1	1	1	0.527
E047_Primary_T_CD8+_naive_cells_from_peripheral_blood_Blood_erc2-chromatin15state-all-files/E047_7_Enh.bed	0.0002	1	1	1	1	1	1	3.85e-06	0.272	0.559	8.03e-07	0.0338	1	1	1	0.412	0.338	1	1	0.146	1	1	0.467	1	1.69e-08	1.07e-11	1	1	0.0674	1	3.33e-06	0.116	1	1	1	1	0.802	1	1	1	1	1	1	1	0.000107	0.101	1	1	0.296
E047_Primary_T_CD8+_naive_cells_from_peripheral_blood_Blood_erc2-chromatin15state-all-files/E047_8_ZNF-Rpts.bed	1	1	1	1	1	1	1	1	1	1	1	1	1	1	1	1	1	1	1	1	0.499	1	1	1	0.918	1	1	1	1	1	0.895	1	1	1	1	1	1	1	1	1	1	1	1	1	1	1	1	1	1
E047_Primary_T_CD8+_naive_cells_from_peripheral_blood_Blood_erc2-chromatin15state-all-files/E047_9_Het.bed	1	1	1	1	1	1	1	1	1	0.643	1	1	1	1	1	1	1	1	0.795	1	1	1	1	1	0.733	1	0.734	1	0.996	1	1	1	1	1	1	1	1	0.429	0.393	1	1	1	1	1	1	1	1	1	1
E047_Primary_T_CD8+_naive_cells_from_peripheral_blood_Blood_erc2-chromatin15state-all-files/E047_10_TssBiv.bed	1	1	1	1	1	1	1	1	1	1	1	1	1	1	1	1	0.207	1	1	1	1	1	1	1	1	1	1	1	1	1	1	1	1	1	1	1	0.255	1	1	1	1	1	1	1	1	1	1	1	1
E047_Primary_T_CD8+_naive_cells_from_peripheral_blood_Blood_erc2-chromatin15state-all-files/E047_11_BivFlnk.bed	1	1	1	1	1	1	1	0.299	1	0.153	1	1	1	1	1	1	0.0361	1	0.281	1	0.386	1	1	1	1	1	1	1	1	1	0.429	1	1	1	1	1	0.446	1	1	0.392	1	1	1	1	0.311	1	1	1	1
E047_Primary_T_CD8+_naive_cells_from_peripheral_blood_Blood_erc2-chromatin15state-all-files/E047_12_EnhBiv.bed	0.952	0.139	1	0.131	1	1	1	1	1	0.127	0.986	0.673	1	1	1	1	0.279	1	0.578	0.763	0.201	1	0.437	0.649	0.368	0.93	0.765	1	1	1	0.375	1	1	1	1	1	0.28	0.516	1	0.558	1	0.0905	1	0.0012	1	1	1	1	0.624
E047_Primary_T_CD8+_naive_cells_from_peripheral_blood_Blood_erc2-chromatin15state-all-files/E047_13_ReprPC.bed	1	0.139	1	0.0176	1	1	0.836	0.446	1	0.404	1	0.0379	1	1	1	1	0.186	1	0.461	1	0.00364	1	0.343	1	0.901	1	0.0361	1	0.779	0.069	1	1	1	1	1	1	0.0159	0.535	1	0.437	0.0807	0.72	1	1	0.824	0.371	1	1	0.787
E047_Primary_T_CD8+_naive_cells_from_peripheral_blood_Blood_erc2-chromatin15state-all-files/E047_14_ReprPCWk.bed	1	1	1	0.0545	1	0.633	1	1	1	1	1	0.992	1	1	0.893	1	0.535	1	0.776	1	1	0.968	1	0.328	1	1	1	1	1	2.23e-06	1	1	0.939	0.249	0.12	1	0.844	0.908	1	1	0.883	1	1	1	1	1	0.756	3.21e-06	1
E047_Primary_T_CD8+_naive_cells_from_peripheral_blood_Blood_erc2-chromatin15state-all-files/E047_15_Quies.bed	1	1	1	1	1	1	1	1	1	1	1	1	0.423	1	1	1	1	1	1	1	1	1	1	1	1	1	1	1	1	1	1	1	1	1	1	1	1	1	1	1	1	1	1	1	1	1	1	1	1
E048_Primary_T_CD8+_memory_cells_from_peripheral_blood_Blood_erc2-chromatin15state-all-files/E048_1_TssA.bed	1	0.379	1	0.329	1	0.939	0.656	0.000644	1	0.208	0.0306	0.0114	1	1	0.0401	1	0.132	1	1	0.388	0.343	1	0.343	1	0.622	0.178	0.396	1	0.95	1	0.0157	1	1	1	0.316	1	0.268	0.126	0.0928	1	0.125	0.694	1	1	0.0736	1	1	1	1
E048_Primary_T_CD8+_memory_cells_from_peripheral_blood_Blood_erc2-chromatin15state-all-files/E048_2_TssAFlnk.bed	0.346	1	0.648	1	1	1	1	0.0337	1	1	0.000504	0.646	1	1	1	0.57	0.473	0.971	1	0.0046	0.327	1	1	1	0.00287	5.01e-08	1	1	0.14	1	0.285	1	1	1	1	1	0.451	0.212	1	1	1	1	1	1	0.785	0.981	0.685	1	1
E048_Primary_T_CD8+_memory_cells_from_peripheral_blood_Blood_erc2-chromatin15state-all-files/E048_3_TxFlnk.bed	1	1	1	1	1	1	1	0.464	1	0.735	1	0.404	1	1	1	1	1	1	1	1	1	1	1	1	1	0.151	1	1	1	0.304	0.576	1	1	1	1	1	1	0.722	1	1	1	1	1	1	1	1	1	1	0.454
E048_Primary_T_CD8+_memory_cells_from_peripheral_blood_Blood_erc2-chromatin15state-all-files/E048_4_Tx.bed	1	1	1	1	1	1	1	0.827	1	1	0.728	1	1	1	1	1	1	1	1	1	1	1	0.31	1	0.978	0.859	1	0.888	1	1	0.834	1	1	1	0.456	1	0.867	0.628	1	1	1	1	1	1	0.714	1	1	1	1
E048_Primary_T_CD8+_memory_cells_from_peripheral_blood_Blood_erc2-chromatin15state-all-files/E048_5_TxWk.bed	0.783	1	0.682	0.0364	0.78	1	1	2.12e-06	1	0.000116	0.135	0.0233	1	1	0.655	1	0.114	1	1	0.055	0.00356	1	0.0613	1	0.00947	0.00577	0.221	1	0.000474	1	0.0223	1	0.236	1	0.886	1	0.000163	0.678	1	1	1	1	1	1	0.00902	0.752	1	1	0.671
E048_Primary_T_CD8+_memory_cells_from_peripheral_blood_Blood_erc2-chromatin15state-all-files/E048_6_EnhG.bed	1	1	1	1	1	1	1	0.326	1	1	0.91	0.184	1	1	1	1	1	1	0.856	0.162	1	1	0.845	1	0.292	0.0768	1	0.615	0.572	1	0.0717	1	0.633	1	1	1	0.403	1	1	0.815	1	1	1	1	0.225	1	1	1	1
E048_Primary_T_CD8+_memory_cells_from_peripheral_blood_Blood_erc2-chromatin15state-all-files/E048_7_Enh.bed	2.73e-06	1	1	1	1	1	1	2.33e-05	0.428	0.407	8.03e-07	0.00583	1	1	0.38	1	0.991	0.742	1	0.569	1	1	0.873	1	5.07e-07	1.89e-09	1	1	0.0445	1	9.77e-08	1	1	1	1	0.876	0.323	1	0.778	1	1	1	1	1	0.00723	0.0028	1	1	0.474
E048_Primary_T_CD8+_memory_cells_from_peripheral_blood_Blood_erc2-chromatin15state-all-files/E048_8_ZNF-Rpts.bed	1	1	1	1	1	1	1	1	1	0.897	1	1	1	1	1	1	1	1	1	1	0.768	1	1	1	1	1	1	1	1	1	1	1	1	1	1	1	1	1	1	1	1	1	1	1	1	1	1	1	1
E048_Primary_T_CD8+_memory_cells_from_peripheral_blood_Blood_erc2-chromatin15state-all-files/E048_9_Het.bed	1	1	1	1	1	1	1	1	1	0.462	1	1	1	1	1	1	1	1	1	1	0.307	1	0.79	1	0.426	1	1	1	1	1	0.406	1	1	1	1	1	1	0.909	0.703	1	1	1	1	1	1	1	1	1	1
E048_Primary_T_CD8+_memory_cells_from_peripheral_blood_Blood_erc2-chromatin15state-all-files/E048_10_TssBiv.bed	1	1	1	1	1	1	1	1	1	1	1	1	1	1	1	1	1	1	1	1	1	1	1	1	1	1	1	1	1	1	1	1	1	1	1	1	0.308	1	1	1	1	1	1	1	1	1	1	1	1
E048_Primary_T_CD8+_memory_cells_from_peripheral_blood_Blood_erc2-chromatin15state-all-files/E048_11_BivFlnk.bed	1	1	1	0.205	1	1	1	1	1	0.0196	1	1	1	1	1	1	0.233	1	1	1	1	1	0.437	1	1	1	1	1	1	1	1	1	1	1	1	1	0.0818	1	1	1	1	1	1	0.133	0.271	1	1	1	1
E048_Primary_T_CD8+_memory_cells_from_peripheral_blood_Blood_erc2-chromatin15state-all-files/E048_12_EnhBiv.bed	0.841	0.287	1	1	1	1	1	0.596	1	0.936	0.913	0.167	1	1	1	1	1	1	0.116	0.635	0.0253	1	0.83	1	0.767	1	1	1	0.589	1	0.253	1	1	1	1	1	0.16	0.799	1	0.0652	1	1	1	0.24	0.572	1	1	1	1
E048_Primary_T_CD8+_memory_cells_from_peripheral_blood_Blood_erc2-chromatin15state-all-files/E048_13_ReprPC.bed	1	0.0664	1	0.00819	1	1	1	1	1	0.128	1	0.052	1	1	1	1	0.0398	1	0.305	1	0.00993	1	0.413	1	0.467	1	0.0155	1	1	1	1	1	1	1	0.801	0.234	0.0671	0.674	1	0.281	0.105	0.285	1	1	1	1	1	1	0.154
E048_Primary_T_CD8+_memory_cells_from_peripheral_blood_Blood_erc2-chromatin15state-all-files/E048_14_ReprPCWk.bed	1	1	1	0.12	1	1	0.872	1	1	0.856	1	0.105	1	1	0.516	1	1	1	1	1	0.819	1	1	0.0196	1	1	1	1	1	1	1	1	1	0.945	1	1	1	0.429	1	1	1	1	1	1	1	1	0.496	1	0.205
E048_Primary_T_CD8+_memory_cells_from_peripheral_blood_Blood_erc2-chromatin15state-all-files/E048_15_Quies.bed	1	1	1	1	1	1	1	1	1	1	1	1	0.709	1	1	1	1	1	1	1	1	1	1	1	1	1	1	1	1	1	1	1	1	1	1	1	1	1	1	1	1	1	1	1	1	1	1	1	1
E050_Primary_hematopoietic_stem_cells_G-CSF-mobilized_Female_Blood_erc2-chromatin15state-all-files/E050_1_TssA.bed	1	0.85	1	0.872	1	1	1	0.626	1	0.319	1	0.106	1	1	1	1	0.552	1	1	1	0.072	1	0.413	1	1	1	0.534	1	1	1	0.154	0.947	1	1	0.696	1	0.388	0.117	0.46	1	0.239	1	1	1	1	1	1	1	1
E050_Primary_hematopoietic_stem_cells_G-CSF-mobilized_Female_Blood_erc2-chromatin15state-all-files/E050_2_TssAFlnk.bed	0.533	0.74	0.767	0.115	1	1	1	4.59e-08	1	0.672	0.00887	0.102	1	1	0.273	0.829	0.548	1	1	0.000563	1	1	1	1	0.00133	0.0434	0.793	1	0.0467	1	0.167	1	1	1	0.322	1	0.00894	0.161	0.29	1	1	1	1	1	2.38e-06	0.724	0.883	1	1
E050_Primary_hematopoietic_stem_cells_G-CSF-mobilized_Female_Blood_erc2-chromatin15state-all-files/E050_3_TxFlnk.bed	1	1	1	1	1	1	1	0.0601	1	0.694	1	0.381	1	1	1	1	1	1	0.446	1	0.559	1	1	1	1	1	1	1	0.497	0.349	1	1	1	1	1	1	0.636	0.688	1	0.437	1	1	1	1	1	1	1	1	0.454
E050_Primary_hematopoietic_stem_cells_G-CSF-mobilized_Female_Blood_erc2-chromatin15state-all-files/E050_4_Tx.bed	1	1	1	1	1	1	1	0.000369	1	0.334	0.857	0.242	1	1	0.336	1	1	1	1	1	0.888	1	0.086	1	0.831	0.685	0.992	0.468	0.34	1	0.0117	1	0.811	1	0.837	1	0.0306	0.727	1	1	1	1	1	1	0.48	1	1	1	1
E050_Primary_hematopoietic_stem_cells_G-CSF-mobilized_Female_Blood_erc2-chromatin15state-all-files/E050_5_TxWk.bed	0.354	1	1	0.644	0.682	1	1	0.0215	1	2.58e-06	0.00471	1	1	1	1	1	0.172	1	1	0.515	0.0161	1	0.261	1	0.0375	0.0855	0.709	0.506	0.275	1	0.00206	1	0.633	1	0.443	1	5.48e-06	0.551	1	1	1	1	1	1	0.373	1	0.865	1	0.282
E050_Primary_hematopoietic_stem_cells_G-CSF-mobilized_Female_Blood_erc2-chromatin15state-all-files/E050_6_EnhG.bed	1	1	1	1	0.786	1	1	0.0111	1	0.285	1	1	1	1	0.816	1	1	1	1	1	1	0.885	0.232	1	1	0.00724	1	0.497	0.0866	1	0.465	1	0.14	1	1	1	1	1	1	1	1	1	1	1	0.116	1	1	1	0.779
E050_Primary_hematopoietic_stem_cells_G-CSF-mobilized_Female_Blood_erc2-chromatin15state-all-files/E050_7_Enh.bed	0.101	1	1	0.461	1	1	1	4.41e-09	0.000701	0.789	0.418	0.1	1	1	0.761	1	1	1	1	1	0.00122	1	1	1	1.45e-07	5.01e-08	1	1	0.0109	1	0.115	0.793	0.123	1	1	1	0.176	1	1	0.868	1	1	1	1	2.21e-10	0.769	1	1	0.0669
E050_Primary_hematopoietic_stem_cells_G-CSF-mobilized_Female_Blood_erc2-chromatin15state-all-files/E050_8_ZNF-Rpts.bed	1	1	1	1	1	1	1	1	1	1	1	1	1	1	0.124	1	0.579	1	0.876	1	0.775	0.824	1	1	0.53	1	1	0.689	1	1	0.819	1	1	1	1	1	1	0.961	1	1	1	1	1	1	0.688	1	1	1	1
E050_Primary_hematopoietic_stem_cells_G-CSF-mobilized_Female_Blood_erc2-chromatin15state-all-files/E050_9_Het.bed	1	1	1	1	1	1	0.29	1	1	1	1	1	1	1	1	1	1	1	1	1	1	1	1	1	0.831	1	1	1	0.87	0.0492	0.596	1	1	1	0.768	0.55	1	0.81	0.0454	1	0.348	1	1	1	1	1	1	1	1
E050_Primary_hematopoietic_stem_cells_G-CSF-mobilized_Female_Blood_erc2-chromatin15state-all-files/E050_10_TssBiv.bed	1	1	1	1	1	1	1	1	1	1	1	1	1	1	1	1	1	1	1	1	0.164	1	1	1	1	1	1	1	1	1	1	1	1	1	1	1	0.188	1	0.0651	1	1	1	1	1	1	1	1	1	1
E050_Primary_hematopoietic_stem_cells_G-CSF-mobilized_Female_Blood_erc2-chromatin15state-all-files/E050_11_BivFlnk.bed	1	0.629	1	1	1	1	1	1	1	0.115	1	0.0119	1	1	1	1	0.341	1	1	1	0.000242	1	0.265	0.644	1	1	0.113	1	0.773	1	0.473	1	1	1	0.588	1	0.241	0.3	1	1	1	0.163	1	0.0313	1	1	0.857	1	1
E050_Primary_hematopoietic_stem_cells_G-CSF-mobilized_Female_Blood_erc2-chromatin15state-all-files/E050_12_EnhBiv.bed	1	0.493	0.711	0.117	1	1	0.977	1	1	0.588	1	0.0241	1	1	1	0.716	0.286	1	0.352	1	0.414	0.527	1	1	1	0.201	1	1	1	1	0.458	1	1	1	1	0.62	0.0661	0.0524	1	0.295	0.0748	1	1	0.475	0.986	0.000706	1	1	0.164
E050_Primary_hematopoietic_stem_cells_G-CSF-mobilized_Female_Blood_erc2-chromatin15state-all-files/E050_13_ReprPC.bed	1	0.301	1	0.0176	1	1	0.509	1	1	1	1	0.0571	1	1	1	1	0.415	1	1	1	0.071	1	0.906	0.391	1	1	1	1	1	0.0586	1	1	0.897	1	1	1	1	0.0405	1	0.868	0.352	1	1	1	1	0.304	1	1	0.501
E050_Primary_hematopoietic_stem_cells_G-CSF-mobilized_Female_Blood_erc2-chromatin15state-all-files/E050_14_ReprPCWk.bed	1	1	1	1	1	0.489	0.901	1	1	1	1	0.977	1	0.14	0.845	1	1	1	1	0.362	1	1	1	0.664	1	1	1	1	1	0.0026	1	0.793	1	1	0.846	1	1	1	0.00826	1	1	1	1	1	1	1	1	0.00412	0.799
E050_Primary_hematopoietic_stem_cells_G-CSF-mobilized_Female_Blood_erc2-chromatin15state-all-files/E050_15_Quies.bed	1	0.621	1	1	1	1	1	1	1	1	1	1	1	1	1	1	1	1	1	1	1	1	1	1	1	1	0.988	1	1	1	1	1	1	1	1	1	1	1	1	1	1	1	1	1	1	1	1	1	1
E051_Primary_hematopoietic_stem_cells_G-CSF-mobilized_Male_Blood_erc2-chromatin15state-all-files/E051_1_TssA.bed	1	0.266	1	0.331	1	1	1	0.345	1	0.223	1	0.375	1	1	0.516	1	0.602	1	1	0.113	0.00596	1	0.146	1	1	1	0.363	1	0.549	1	0.206	1	1	1	1	1	0.503	0.105	0.725	1	0.461	1	1	1	0.541	1	1	1	1
E051_Primary_hematopoietic_stem_cells_G-CSF-mobilized_Male_Blood_erc2-chromatin15state-all-files/E051_2_TssAFlnk.bed	0.193	1	1	0.0235	1	0.912	1	3.27e-16	1	0.445	0.00882	0.239	1	1	0.584	0.638	0.905	1	1	0.00732	0.377	1	1	1	1.23e-07	6.81e-05	1	1	0.0136	1	0.0179	1	1	1	0.438	1	0.0168	0.717	0.482	1	0.915	1	1	1	6.15e-11	0.642	0.607	1	0.74
E051_Primary_hematopoietic_stem_cells_G-CSF-mobilized_Male_Blood_erc2-chromatin15state-all-files/E051_3_TxFlnk.bed	1	1	1	1	1	1	1	0.00896	1	1	1	0.256	1	0.847	1	1	1	1	0.507	1	0.451	1	1	1	1	0.114	1	1	0.0698	0.631	1	1	1	1	1	1	0.0975	0.931	1	0.558	1	1	1	1	0.654	1	1	1	0.603
E051_Primary_hematopoietic_stem_cells_G-CSF-mobilized_Male_Blood_erc2-chromatin15state-all-files/E051_4_Tx.bed	1	1	1	1	1	1	1	0.000433	1	0.442	0.738	0.365	1	1	0.517	1	1	0.217	1	1	0.557	1	0.086	1	0.957	0.624	1	0.31	0.188	1	0.0134	1	0.346	1	0.693	1	0.00338	0.532	1	1	1	1	1	1	0.396	1	0.992	1	0.976
E051_Primary_hematopoietic_stem_cells_G-CSF-mobilized_Male_Blood_erc2-chromatin15state-all-files/E051_5_TxWk.bed	0.653	1	1	0.223	1	1	1	0.0167	1	9.59e-06	0.0948	0.754	1	1	0.95	1	0.0436	1	1	0.493	0.00994	1	0.259	1	0.118	0.419	0.337	0.637	0.681	1	0.00422	1	1	1	0.904	1	0.012	0.846	1	1	1	1	1	1	0.414	1	0.859	1	0.603
E051_Primary_hematopoietic_stem_cells_G-CSF-mobilized_Male_Blood_erc2-chromatin15state-all-files/E051_6_EnhG.bed	0.927	1	1	1	0.899	1	1	0.521	1	0.444	1	1	1	1	0.816	1	1	1	1	1	1	0.948	0.453	1	0.767	0.126	1	0.564	0.506	1	0.227	1	0.667	1	1	1	1	1	1	1	1	1	1	1	0.0632	1	1	1	0.854
E051_Primary_hematopoietic_stem_cells_G-CSF-mobilized_Male_Blood_erc2-chromatin15state-all-files/E051_7_Enh.bed	0.0643	1	1	1	1	1	1	1.16e-05	0.0479	0.32	0.303	0.174	1	1	0.578	1	0.854	1	0.776	1	0.189	1	1	1	0.000302	0.000109	1	0.804	0.323	1	0.241	0.614	0.333	1	0.745	0.329	0.141	1	1	0.781	1	1	1	1	0.00506	0.907	1	1	0.0987
E051_Primary_hematopoietic_stem_cells_G-CSF-mobilized_Male_Blood_erc2-chromatin15state-all-files/E051_8_ZNF-Rpts.bed	1	1	1	1	1	1	1	1	1	0.805	1	1	1	1	0.286	1	0.639	1	1	1	1	0.968	1	1	0.466	1	0.777	0.996	1	1	0.545	1	1	1	0.768	1	1	0.729	1	1	1	1	1	1	1	1	1	1	0.955
E051_Primary_hematopoietic_stem_cells_G-CSF-mobilized_Male_Blood_erc2-chromatin15state-all-files/E051_9_Het.bed	1	1	1	1	1	1	0.999	1	1	0.951	1	1	1	1	1	1	1	1	1	1	1	1	1	1	1	1	1	1	1	0.0112	1	1	1	1	1	0.152	1	0.837	0.0999	1	0.549	1	1	1	1	1	1	0.22	1
E051_Primary_hematopoietic_stem_cells_G-CSF-mobilized_Male_Blood_erc2-chromatin15state-all-files/E051_10_TssBiv.bed	1	1	1	1	1	1	1	1	1	1	1	1	1	1	1	1	1	1	1	1	1	1	1	1	1	1	1	1	1	1	1	1	1	1	1	1	0.0473	1	1	1	0.0811	1	1	1	1	1	1	1	1
E051_Primary_hematopoietic_stem_cells_G-CSF-mobilized_Male_Blood_erc2-chromatin15state-all-files/E051_11_BivFlnk.bed	1	0.379	1	1	1	1	1	1	1	0.128	1	0.0104	1	1	1	1	0.208	1	0.781	1	0.000182	1	0.394	0.86	1	1	0.00701	1	0.87	1	0.69	1	1	1	0.684	1	0.253	0.0503	0.381	0.765	1	0.212	1	0.00429	0.936	1	0.959	1	1
E051_Primary_hematopoietic_stem_cells_G-CSF-mobilized_Male_Blood_erc2-chromatin15state-all-files/E051_12_EnhBiv.bed	1	1	1	1	1	1	0.389	1	1	0.601	1	0.141	1	1	1	1	0.00997	1	0.889	1	0.0956	1	1	1	1	0.808	1	1	1	1	0.808	1	1	0.108	0.739	0.235	0.305	0.0243	1	0.821	0.0811	1	1	1	0.998	0.699	0.659	1	0.472
E051_Primary_hematopoietic_stem_cells_G-CSF-mobilized_Male_Blood_erc2-chromatin15state-all-files/E051_13_ReprPC.bed	1	0.769	1	0.136	1	1	1	1	1	1	1	0.101	1	1	1	0.784	1	1	1	0.567	0.227	1	1	0.603	1	1	1	1	1	8.26e-05	1	1	1	1	0.886	0.622	1	0.967	0.506	0.908	1	1	0.843	1	1	0.0113	1	0.000399	0.196
E051_Primary_hematopoietic_stem_cells_G-CSF-mobilized_Male_Blood_erc2-chromatin15state-all-files/E051_14_ReprPCWk.bed	1	1	1	1	1	0.126	0.173	1	1	1	1	0.739	1	0.0657	0.841	1	0.919	1	1	1	1	1	1	0.573	1	1	1	1	1	0.48	1	1	1	1	1	1	1	0.761	0.429	1	0.352	1	1	0.935	1	1	1	1	1
E051_Primary_hematopoietic_stem_cells_G-CSF-mobilized_Male_Blood_erc2-chromatin15state-all-files/E051_15_Quies.bed	1	0.629	1	1	1	1	1	1	1	1	1	1	0.214	1	1	1	1	1	1	1	1	1	1	1	1	1	1	1	1	1	1	1	1	1	1	1	1	1	1	1	1	1	1	1	1	1	1	1	1
E062_Primary_mononuclear_cells_from_peripheral_blood_Blood_erc2-chromatin15state-all-files/E062_1_TssA.bed	0.0249	0.0577	1	0.263	1	1	1	1	1	0.674	0.277	0.0375	1	1	1	1	0.528	1	1	0.38	0.297	1	0.725	1	1	0.742	0.00949	1	0.943	1	0.0547	1	1	1	0.0453	1	0.772	0.156	0.759	1	1	1	1	1	0.429	0.67	0.59	1	1
E062_Primary_mononuclear_cells_from_peripheral_blood_Blood_erc2-chromatin15state-all-files/E062_2_TssAFlnk.bed	1	1	1	0.935	1	1	0.788	7.19e-05	1	0.697	0.201	0.052	1	1	0.0311	1	0.231	1	1	0.304	0.0888	1	0.935	1	0.421	0.172	1	1	0.727	1	0.106	1	1	1	1	1	0.0194	0.0803	0.923	1	0.106	1	1	1	0.052	1	1	1	1
E062_Primary_mononuclear_cells_from_peripheral_blood_Blood_erc2-chromatin15state-all-files/E062_3_TxFlnk.bed	0.626	1	1	1	1	1	1	1	1	1	1	0.375	1	1	1	1	1	1	1	1	1	1	1	1	0.648	0.163	1	1	0.486	0.307	1	1	1	1	1	1	0.267	1	1	1	1	1	1	1	1	1	0.685	1	0.461
E062_Primary_mononuclear_cells_from_peripheral_blood_Blood_erc2-chromatin15state-all-files/E062_4_Tx.bed	0.754	1	0.711	1	1	1	1	0.00967	1	1	0.425	0.0904	1	1	0.126	1	0.985	0.449	1	0.165	0.962	1	0.0223	1	0.156	0.784	1	0.573	0.167	1	0.00626	1	0.271	1	0.745	0.299	0.00219	0.155	0.701	1	0.961	1	1	1	0.263	1	1	1	0.873
E062_Primary_mononuclear_cells_from_peripheral_blood_Blood_erc2-chromatin15state-all-files/E062_5_TxWk.bed	0.00157	1	1	0.252	1	1	1	2.16e-10	1	6.67e-07	0.000862	0.675	1	1	1	1	0.39	1	1	0.472	0.0161	1	0.437	1	0.0106	2.03e-06	1	0.772	0.458	1	0.00119	1	0.0939	1	1	1	0.0147	1	1	1	1	1	1	1	0.000159	0.5	1	1	0.797
E062_Primary_mononuclear_cells_from_peripheral_blood_Blood_erc2-chromatin15state-all-files/E062_6_EnhG.bed	0.379	1	1	1	1	1	1	0.00287	1	0.979	0.0342	0.674	1	1	1	0.829	1	0.036	1	1	0.843	1	1	1	0.319	0.00375	1	1	0.729	1	0.00497	1	0.987	1	1	1	0.226	0.843	0.284	1	1	1	1	1	0.171	1	0.78	1	0.725
E062_Primary_mononuclear_cells_from_peripheral_blood_Blood_erc2-chromatin15state-all-files/E062_7_Enh.bed	0.149	1	0.682	1	1	1	1	0.025	1	0.788	0.105	0.226	1	1	1	1	0.892	1	1	0.0701	0.482	1	0.559	1	8.51e-09	1.14e-07	1	1	0.0145	1	0.00123	0.947	1	1	0.736	1	0.45	0.617	1	1	1	1	1	1	0.0572	1	0.934	1	0.486
E062_Primary_mononuclear_cells_from_peripheral_blood_Blood_erc2-chromatin15state-all-files/E062_8_ZNF-Rpts.bed	1	1	1	1	1	1	1	1	1	1	1	1	1	1	0.424	1	1	1	1	1	0.514	1	1	1	1	1	1	1	1	1	0.41	1	1	1	1	1	1	1	0.7	1	1	1	1	1	1	1	1	1	1
E062_Primary_mononuclear_cells_from_peripheral_blood_Blood_erc2-chromatin15state-all-files/E062_9_Het.bed	1	1	1	1	1	1	0.42	1	1	1	1	1	1	1	1	1	1	1	1	1	0.905	1	1	1	1	1	1	1	0.931	1	1	1	1	1	0.936	0.501	1	0.742	0.329	1	0.831	1	1	1	1	1	1	1	1
E062_Primary_mononuclear_cells_from_peripheral_blood_Blood_erc2-chromatin15state-all-files/E062_10_TssBiv.bed	0.698	0.777	1	0.331	1	1	1	0.43	1	0.807	1	1	1	1	1	1	1	1	1	1	0.0337	1	1	0.421	1	1	0.024	1	1	1	0.569	1	1	1	1	1	0.064	0.628	1	1	0.0877	1	1	0.19	1	1	1	1	0.454
E062_Primary_mononuclear_cells_from_peripheral_blood_Blood_erc2-chromatin15state-all-files/E062_11_BivFlnk.bed	1	1	1	1	1	1	1	0.555	1	0.172	1	0.0336	1	1	1	1	0.106	1	1	1	0.764	1	0.291	1	1	1	1	1	1	1	1	1	0.754	1	1	1	0.844	0.285	1	1	1	0.0704	1	1	0.521	1	1	1	1
E062_Primary_mononuclear_cells_from_peripheral_blood_Blood_erc2-chromatin15state-all-files/E062_12_EnhBiv.bed	0.75	0.892	1	0.46	1	1	1	0.577	1	0.185	0.885	0.0338	1	1	1	1	0.583	1	0.507	1	0.327	1	0.756	1	0.226	0.806	1	1	1	1	1	1	1	1	1	1	0.88	0.354	1	0.468	0.142	1	1	1	0.521	1	1	1	1
E062_Primary_mononuclear_cells_from_peripheral_blood_Blood_erc2-chromatin15state-all-files/E062_13_ReprPC.bed	1	0.76	1	0.00351	1	1	1	1	1	0.264	1	0.145	1	1	0.841	1	0.517	1	0.451	1	0.00119	0.968	0.961	0.875	1	1	0.221	1	1	1	1	1	0.886	0.698	0.936	1	0.0404	0.228	1	0.405	0.0949	0.987	1	0.277	0.99	0.00195	1	1	0.585
E062_Primary_mononuclear_cells_from_peripheral_blood_Blood_erc2-chromatin15state-all-files/E062_14_ReprPCWk.bed	1	1	1	0.167	1	0.246	0.614	1	1	1	1	0.321	1	1	0.281	1	0.792	1	1	1	0.848	1	1	0.387	1	1	1	1	1	0.0919	1	1	1	1	0.558	0.152	1	1	0.895	1	1	1	1	1	1	0.856	0.765	1	1
E062_Primary_mononuclear_cells_from_peripheral_blood_Blood_erc2-chromatin15state-all-files/E062_15_Quies.bed	1	0.301	1	1	1	1	1	1	1	1	1	1	0.076	1	1	1	1	1	1	1	1	1	1	1	1	1	1	1	1	1	1	1	1	1	1	1	1	1	1	1	1	1	1	1	1	1	1	1	1
E115_Dnd41_TCell_Leukemia_Blood_erc2-chromatin15state-all-files/E115_1_TssA.bed	1	0.301	1	0.0398	1	0.641	1	0.814	1	0.0797	1	0.0364	1	1	0.0143	1	0.724	1	1	0.492	0.358	1	0.363	1	1	0.634	0.246	1	1	1	0.268	1	1	1	0.835	1	0.933	0.118	0.594	1	0.364	1	1	1	1	1	1	1	1
E115_Dnd41_TCell_Leukemia_Blood_erc2-chromatin15state-all-files/E115_2_TssAFlnk.bed	0.922	0.92	1	1	1	1	1	8.54e-05	1	0.579	0.273	0.583	1	1	1	1	1	1	1	0.925	0.712	1	0.983	1	0.00966	0.014	1	1	0.716	1	0.284	1	1	1	1	1	0.261	0.0979	1	1	1	1	1	1	0.48	1	0.604	1	1
E115_Dnd41_TCell_Leukemia_Blood_erc2-chromatin15state-all-files/E115_3_TxFlnk.bed	0.631	1	0.442	1	1	1	1	1	1	1	0.574	0.509	1	1	1	0.412	0.794	1	0.876	0.677	1	0.824	1	1	1	0.172	1	0.825	0.0684	1	0.106	1	0.779	1	0.998	1	0.611	1	1	0.993	1	1	1	1	1	1	1	1	1
E115_Dnd41_TCell_Leukemia_Blood_erc2-chromatin15state-all-files/E115_4_Tx.bed	1	1	1	1	1	1	1	0.0467	1	0.527	1	0.278	1	1	0.181	1	1	1	1	0.476	0.808	1	0.086	1	0.896	0.918	0.811	0.271	1	1	0.374	1	0.291	1	0.564	1	0.0171	0.293	1	1	1	1	1	1	0.135	1	1	1	1
E115_Dnd41_TCell_Leukemia_Blood_erc2-chromatin15state-all-files/E115_5_TxWk.bed	0.943	0.769	1	0.327	1	1	1	0.0234	1	8.38e-06	1	0.262	1	1	1	0.63	0.424	1	1	0.446	0.00295	1	0.145	1	0.735	0.126	0.906	1	0.0653	1	0.475	1	0.585	1	1	1	0.00642	1	0.506	1	0.724	1	1	1	0.454	1	1	1	1
E115_Dnd41_TCell_Leukemia_Blood_erc2-chromatin15state-all-files/E115_6_EnhG.bed	1	1	1	0.982	1	1	1	0.179	1	0.897	1	1	1	1	0.44	1	1	1	1	1	0.812	0.972	0.562	1	0.109	0.489	0.5	1	0.956	1	0.0027	1	0.375	1	1	1	1	0.922	1	1	1	1	1	1	0.0884	1	1	1	0.941
E115_Dnd41_TCell_Leukemia_Blood_erc2-chromatin15state-all-files/E115_7_Enh.bed	0.000594	1	1	0.475	1	1	0.987	0.217	1	0.444	5.59e-05	0.046	1	1	0.454	1	0.985	1	1	0.929	0.381	1	1	1	0.0757	0.000349	1	1	0.228	1	0.0134	1	0.709	1	1	0.915	0.454	1	1	1	1	1	1	1	0.504	1	1	1	0.0435
E115_Dnd41_TCell_Leukemia_Blood_erc2-chromatin15state-all-files/E115_8_ZNF-Rpts.bed	1	1	1	1	1	1	1	1	1	0.849	1	1	1	1	1	1	1	1	0.661	1	1	1	1	1	1	0.783	1	1	1	1	1	1	1	1	0.919	1	1	1	1	1	1	1	1	1	1	1	1	1	1
E115_Dnd41_TCell_Leukemia_Blood_erc2-chromatin15state-all-files/E115_9_Het.bed	1	1	1	1	1	1	0.344	1	1	1	1	1	1	1	1	1	0.847	1	1	1	0.985	1	1	1	0.525	1	1	1	1	0.986	0.836	1	1	1	1	0.555	1	0.924	0.0479	1	1	1	1	0.544	0.783	1	1	1	1
E115_Dnd41_TCell_Leukemia_Blood_erc2-chromatin15state-all-files/E115_10_TssBiv.bed	1	1	1	1	1	1	1	1	1	1	1	0.0826	1	1	1	1	1	1	1	1	1	1	1	1	1	1	1	1	1	1	1	1	1	1	1	1	1	1	1	1	1	1	1	1	1	1	1	1	1
E115_Dnd41_TCell_Leukemia_Blood_erc2-chromatin15state-all-files/E115_11_BivFlnk.bed	1	0.219	1	1	1	1	1	1	1	1	1	0.413	1	1	1	1	0.0829	1	1	1	1	1	1	1	0.652	1	1	1	1	1	0.594	1	1	1	1	1	0.733	0.663	1	1	1	1	1	1	0.392	1	1	1	1
E115_Dnd41_TCell_Leukemia_Blood_erc2-chromatin15state-all-files/E115_12_EnhBiv.bed	1	1	1	1	1	1	1	0.524	1	0.837	1	0.489	1	1	1	1	0.517	1	1	0.519	1	1	0.71	1	0.68	1	1	1	1	1	0.0504	1	1	1	1	1	0.0892	1	1	1	1	1	1	1	0.481	1	1	1	1
E115_Dnd41_TCell_Leukemia_Blood_erc2-chromatin15state-all-files/E115_13_ReprPC.bed	1	0.472	1	1	1	1	0.788	1	1	1	0.305	0.335	1	1	1	1	0.97	1	0.684	1	0.049	1	1	1	0.623	1	1	0.834	1	1	0.512	1	1	1	0.6	1	0.222	1	1	0.731	1	1	0.374	1	0.897	0.00817	1	1	1
E115_Dnd41_TCell_Leukemia_Blood_erc2-chromatin15state-all-files/E115_14_ReprPCWk.bed	1	1	1	0.117	1	0.354	1	1	1	1	1	0.401	1	1	0.246	1	0.0338	1	1	1	0.713	1	1	1	1	1	1	1	1	1	1	0.807	1	1	0.911	0.483	1	0.325	0.599	0.696	0.724	1	1	1	1	0.746	0.709	1	0.327
E115_Dnd41_TCell_Leukemia_Blood_erc2-chromatin15state-all-files/E115_15_Quies.bed	1	0.151	1	1	1	1	0.902	1	1	1	1	1	0.145	1	1	1	1	1	1	1	1	1	1	1	1	1	0.454	1	1	0.113	1	1	1	1	1	1	1	1	1	1	1	1	1	1	1	1	1	0.234	1
E116_GM12878_Lymphoblastoid_Blood_erc2-chromatin15state-all-files/E116_1_TssA.bed	1	0.569	1	0.161	1	1	1	0.299	1	0.031	0.169	0.388	1	1	0.422	1	0.274	1	1	0.0485	0.0474	1	0.71	1	0.698	0.124	1	1	0.729	1	0.0068	1	1	1	0.203	1	0.201	0.0058	1	1	0.527	1	1	1	0.521	1	0.774	1	0.855
E116_GM12878_Lymphoblastoid_Blood_erc2-chromatin15state-all-files/E116_2_TssAFlnk.bed	0.0415	1	1	1	1	1	1	0.000114	0.428	1	0.0926	0.271	1	1	1	1	0.806	1	1	0.00376	1	1	1	1	3.08e-05	6.42e-07	1	0.537	0.359	1	5.45e-08	1	1	1	1	0.858	0.113	1	1	1	1	1	1	1	1.5e-05	0.347	1	1	0.122
E116_GM12878_Lymphoblastoid_Blood_erc2-chromatin15state-all-files/E116_3_TxFlnk.bed	1	1	0.383	0.215	1	1	1	1	1	0.313	0.666	0.0353	1	1	1	0.412	1	0.914	1	1	1	0.17	1	1	0.755	0.00166	1	1	0.391	1	0.000154	1	0.375	1	1	0.622	1	1	1	1	1	1	1	1	1	0.962	1	1	1
E116_GM12878_Lymphoblastoid_Blood_erc2-chromatin15state-all-files/E116_4_Tx.bed	1	1	1	1	1	1	1	0.0387	1	0.89	0.885	0.964	1	1	0.824	1	1	1	1	0.38	0.921	1	0.125	1	0.562	0.938	1	0.409	1	1	0.944	1	0.637	1	0.475	1	0.0491	0.285	1	1	1	1	1	1	0.481	1	1	1	1
E116_GM12878_Lymphoblastoid_Blood_erc2-chromatin15state-all-files/E116_5_TxWk.bed	0.568	0.65	1	0.174	1	1	1	0.00238	1	7.96e-05	0.118	0.0501	1	1	0.0326	1	0.0511	1	1	0.162	0.00579	1	0.086	1	1	0.109	0.157	1	0.144	1	0.0279	1	0.207	1	0.664	1	0.00115	1	1	1	1	1	1	1	0.359	0.935	1	1	0.452
E116_GM12878_Lymphoblastoid_Blood_erc2-chromatin15state-all-files/E116_6_EnhG.bed	1	0.78	1	1	0.101	1	1	0.559	1	0.789	1	0.969	1	1	1	1	1	1	1	1	0.477	1	0.313	1	0.0322	0.235	1	0.984	0.275	1	0.236	1	1	1	1	0.726	0.394	0.778	0.777	1	1	1	1	1	0.153	1	1	1	0.285
E116_GM12878_Lymphoblastoid_Blood_erc2-chromatin15state-all-files/E116_7_Enh.bed	0.000333	1	1	1	1	1	1	0.000143	0.511	0.745	0.000102	0.105	1	1	1	0.829	0.465	1	1	0.315	0.427	1	1	1	8.56e-07	0.000449	1	1	0.184	1	1.5e-07	1	1	1	1	1	0.533	0.956	1	1	1	1	1	1	0.0796	0.721	1	1	0.807
E116_GM12878_Lymphoblastoid_Blood_erc2-chromatin15state-all-files/E116_8_ZNF-Rpts.bed	1	1	1	1	1	1	0.956	0.716	1	1	1	0.588	1	1	1	1	0.667	1	0.915	1	0.474	1	1	1	0.0941	0.49	1	1	1	1	0.259	1	1	1	1	1	1	1	1	1	0.47	1	1	1	1	1	1	1	0.775
E116_GM12878_Lymphoblastoid_Blood_erc2-chromatin15state-all-files/E116_9_Het.bed	1	1	1	0.583	1	1	1	0.676	1	1	1	0.82	1	0.88	1	1	1	1	1	0.925	0.394	1	1	1	0.354	1	1	1	1	1	1	1	1	1	1	0.538	1	0.927	0.387	1	1	1	1	1	1	0.67	1	1	1
E116_GM12878_Lymphoblastoid_Blood_erc2-chromatin15state-all-files/E116_10_TssBiv.bed	1	1	1	1	1	1	1	1	1	1	1	0.04	1	1	1	1	0.0426	1	1	1	0.0724	1	1	1	1	1	1	1	1	1	0.433	1	1	1	1	1	1	1	1	1	1	1	1	1	1	1	1	1	1
E116_GM12878_Lymphoblastoid_Blood_erc2-chromatin15state-all-files/E116_11_BivFlnk.bed	1	1	1	1	1	1	1	0.396	1	0.296	1	1	1	1	1	1	0.0952	1	1	1	1	1	0.209	1	0.597	1	1	1	1	1	1	1	0.54	1	1	1	0.652	1	1	1	1	0.142	0.72	1	1	1	1	1	1
E116_GM12878_Lymphoblastoid_Blood_erc2-chromatin15state-all-files/E116_12_EnhBiv.bed	0.644	0.301	1	0.107	1	1	1	1	1	1	0.864	1	1	1	1	1	1	1	0.461	1	0.0785	1	0.71	1	0.267	0.249	1	1	0.497	1	0.689	1	1	1	1	1	0.0364	1	1	0.477	1	1	1	0.00712	0.48	0.741	1	1	0.563
E116_GM12878_Lymphoblastoid_Blood_erc2-chromatin15state-all-files/E116_13_ReprPC.bed	1	0.638	1	0.832	1	1	1	0.186	1	0.0883	1	0.169	1	1	0.765	1	0.016	1	0.461	0.783	0.000684	1	0.343	1	0.648	1	0.187	1	1	1	0.891	1	1	1	1	0.791	0.0219	0.93	1	0.468	0.81	1	1	1	0.803	0.731	0.78	1	0.775
E116_GM12878_Lymphoblastoid_Blood_erc2-chromatin15state-all-files/E116_14_ReprPCWk.bed	1	1	0.819	0.174	1	0.592	1	1	1	1	1	0.179	1	1	0.657	0.547	1	1	1	1	0.674	1	1	0.219	1	1	1	0.677	1	1	1	1	1	1	0.36	1	0.98	0.639	1	1	1	1	1	0.434	0.88	0.707	1	1	0.671
E116_GM12878_Lymphoblastoid_Blood_erc2-chromatin15state-all-files/E116_15_Quies.bed	1	0.9	1	1	1	1	1	1	1	1	1	1	0.968	1	1	1	1	1	1	1	1	1	1	1	1	1	1	1	1	1	1	1	1	1	1	1	1	1	1	0.765	1	1	1	1	1	1	1	0.898	1
E123_K562_Leukemia_Blood_erc2-chromatin15state-all-files/E123_1_TssA.bed	1	0.621	1	0.0331	1	1	1	0.201	1	0.0254	1	0.435	1	1	0.221	1	0.639	1	1	0.274	0.0343	1	1	1	0.83	1	0.961	1	0.182	1	0.119	1	1	1	0.267	1	0.121	0.00874	0.222	1	0.346	1	1	1	0.301	1	1	1	1
E123_K562_Leukemia_Blood_erc2-chromatin15state-all-files/E123_2_TssAFlnk.bed	1	1	0.65	1	1	1	1	8.23e-05	1	0.692	0.738	0.221	1	1	1	0.632	0.447	1	1	0.256	0.92	1	1	1	0.0894	0.122	1	0.984	1.45e-08	1	0.136	1	1	0.718	0.322	1	0.0818	0.998	0.869	1	1	1	1	1	0.000775	1	0.78	1	0.0392
E123_K562_Leukemia_Blood_erc2-chromatin15state-all-files/E123_3_TxFlnk.bed	1	1	0.374	1	1	1	1	0.00959	1	0.497	1	0.674	1	1	1	0.359	1	1	0.791	1	0.989	0.824	1	1	0.54	0.831	1	0.61	0.268	1	0.834	1	1	1	0.384	1	0.333	0.961	1	0.868	1	1	1	1	0.239	1	1	1	0.986
E123_K562_Leukemia_Blood_erc2-chromatin15state-all-files/E123_4_Tx.bed	1	1	1	1	1	1	1	0.984	1	1	1	0.463	1	1	0.0423	1	1	1	1	1	1	1	0.335	1	1	0.866	0.838	0.597	0.424	1	0.523	1	0.776	1	0.371	1	0.255	0.263	1	1	1	1	1	1	0.66	1	1	1	1
E123_K562_Leukemia_Blood_erc2-chromatin15state-all-files/E123_5_TxWk.bed	1	1	1	0.0929	1	1	1	5.43e-07	0.857	1.84e-05	0.184	0.00951	1	1	1	1	0.399	1	1	1	0.00033	1	0.0606	1	0.0184	0.00377	0.684	0.61	0.0111	1	0.00343	1	0.0157	1	0.144	1	5.72e-05	1	1	1	1	1	1	1	0.301	0.436	1	1	0.594
E123_K562_Leukemia_Blood_erc2-chromatin15state-all-files/E123_6_EnhG.bed	0.995	1	1	1	0.145	1	1	0.0399	1	1	1	0.529	1	1	0.993	1	1	1	1	1	0.973	0.951	1	1	0.426	1	1	0.166	0.2	1	0.489	1	0.104	1	0.716	1	0.509	0.97	0.397	1	1	1	1	1	0.0854	1	0.992	1	0.164
E123_K562_Leukemia_Blood_erc2-chromatin15state-all-files/E123_7_Enh.bed	0.327	1	1	1	1	1	1	8e-06	1	1	0.52	0.052	1	1	0.152	1	0.189	1	1	1	0.1	1	1	1	1	0.021	1	0.47	0.0752	1	1	0.48	0.511	1	0.611	1	0.0797	1	1	1	1	1	1	1	0.00322	0.0136	1	1	0.0772
E123_K562_Leukemia_Blood_erc2-chromatin15state-all-files/E123_8_ZNF-Rpts.bed	1	1	1	1	1	1	1	1	1	1	1	1	1	1	1	1	1	1	0.5	1	1	1	1	1	0.187	1	1	1	0.66	1	0.895	1	1	1	1	1	1	1	1	1	1	1	1	1	1	1	1	1	1
E123_K562_Leukemia_Blood_erc2-chromatin15state-all-files/E123_9_Het.bed	1	1	1	1	1	1	1	1	1	1	1	1	1	1	1	1	1	1	1	1	1	1	1	1	1	1	0.5	1	1	1	1	1	1	1	1	1	1	1	1	1	1	1	1	1	1	1	1	1	1
E123_K562_Leukemia_Blood_erc2-chromatin15state-all-files/E123_10_TssBiv.bed	1	1	1	1	1	1	1	1	1	1	1	1	1	1	1	1	1	1	1	1	1	1	1	1	1	1	1	1	1	0.0801	1	1	0.221	1	1	1	1	1	1	1	1	1	1	1	1	1	1	1	1
E123_K562_Leukemia_Blood_erc2-chromatin15state-all-files/E123_11_BivFlnk.bed	1	1	1	1	1	1	1	1	1	1	1	1	1	1	1	1	1	1	1	1	0.257	1	1	1	1	1	1	1	1	1	1	1	1	1	1	1	1	1	1	1	1	1	1	1	1	1	1	1	1
E123_K562_Leukemia_Blood_erc2-chromatin15state-all-files/E123_12_EnhBiv.bed	1	1	1	1	1	1	0.626	1	1	0.521	1	0.617	1	1	1	1	1	1	1	1	0.109	1	1	1	1	0.842	1	1	1	1	0.791	1	1	1	1	1	0.885	1	1	1	1	1	1	0.266	1	1	0.773	1	1
E123_K562_Leukemia_Blood_erc2-chromatin15state-all-files/E123_13_ReprPC.bed	0.66	1	1	0.326	1	1	1	1	1	1	1	0.22	1	1	0.879	0.229	0.0291	0.791	0.966	1	1	1	1	1	0.592	0.23	1	1	1	0.834	0.25	1	1	0.697	1	1	0.788	0.819	0.324	0.868	1	1	1	1	1	0.0243	0.708	1	0.444
E123_K562_Leukemia_Blood_erc2-chromatin15state-all-files/E123_14_ReprPCWk.bed	1	1	1	0.439	1	0.441	0.882	1	1	1	1	0.269	1	1	0.121	0.63	0.53	1	1	1	0.76	1	1	0.57	1	1	1	1	1	0.842	1	1	1	1	1	0.152	1	0.209	0.0872	1	0.24	1	1	0.63	1	0.731	1	1	0.126
E123_K562_Leukemia_Blood_erc2-chromatin15state-all-files/E123_15_Quies.bed	1	0.0503	1	1	1	1	1	1	1	0.887	1	1	0.0431	0.844	1	1	1	1	0.5	1	1	1	1	1	1	1	0.246	1	1	1	1	1	1	1	1	1	1	1	1	0.836	1	1	1	1	1	1	1	1	1
E124_Monocytes-CD14+_RO01746_Primary_Cells_Blood_erc2-chromatin15state-all-files/E124_1_TssA.bed	1	1	1	1	1	1	1	0.00254	1	0.651	1	0.0274	1	1	0.525	1	0.48	1	1	0.0131	0.0739	1	0.259	1	0.121	1	1	1	0.714	1	0.0358	1	1	1	0.186	1	0.253	0.0221	0.823	1	0.456	1	1	1	0.00448	1	1	1	1
E124_Monocytes-CD14+_RO01746_Primary_Cells_Blood_erc2-chromatin15state-all-files/E124_2_TssAFlnk.bed	0.313	1	0.59	0.0985	0.494	1	1	3.71e-06	0.609	0.778	0.0332	0.129	1	1	0.241	0.63	0.76	1	1	0.0497	0.396	1	1	1	0.000465	0.00113	1	1	0.031	1	5.39e-05	1	0.216	1	0.637	1	0.32	0.152	0.794	1	1	1	1	1	0.000775	0.291	1	1	0.526
E124_Monocytes-CD14+_RO01746_Primary_Cells_Blood_erc2-chromatin15state-all-files/E124_3_TxFlnk.bed	0.906	1	1	1	1	1	1	0.9	1	0.741	1	0.794	1	1	1	1	1	1	0.684	0.27	1	1	1	1	0.233	0.186	1	1	0.298	0.858	0.0168	1	0.955	1	1	1	0.744	0.994	1	0.633	1	1	1	1	1	1	1	1	0.758
E124_Monocytes-CD14+_RO01746_Primary_Cells_Blood_erc2-chromatin15state-all-files/E124_4_Tx.bed	1	1	1	1	1	1	1	0.000176	1	0.612	1	0.334	1	1	0.781	1	1	1	1	0.445	1	1	0.0613	1	0.233	0.188	1	0.0707	0.426	1	0.00271	1	0.0759	1	0.998	1	0.00167	0.536	1	1	1	1	1	1	0.445	1	1	1	1
E124_Monocytes-CD14+_RO01746_Primary_Cells_Blood_erc2-chromatin15state-all-files/E124_5_TxWk.bed	0.00983	1	1	0.381	1	1	1	0.0738	1	3.11e-06	0.0307	0.299	1	1	0.188	1	0.616	1	0.461	1	0.000285	1	0.723	1	0.357	0.000358	0.576	0.32	0.251	1	0.204	1	0.658	1	1	1	0.107	1	1	0.646	1	1	1	1	0.736	0.117	1	1	0.608
E124_Monocytes-CD14+_RO01746_Primary_Cells_Blood_erc2-chromatin15state-all-files/E124_6_EnhG.bed	1	1	1	1	1	1	0.734	0.0173	1	0.953	0.135	0.26	1	1	1	1	0.982	0.0864	1	0.743	0.868	0.824	0.793	1	0.174	0.511	1	1	0.378	1	0.118	1	1	1	1	1	1	0.228	1	1	1	1	1	1	0.419	1	1	1	0.761
E124_Monocytes-CD14+_RO01746_Primary_Cells_Blood_erc2-chromatin15state-all-files/E124_7_Enh.bed	0.0919	1	1	1	1	1	1	2.34e-05	0.975	0.226	0.142	0.169	1	1	1	1	0.965	1	1	1	0.00229	1	1	1	1.69e-08	0.00113	1	1	0.421	1	0.117	1	0.236	1	1	1	0.297	1	0.782	1	1	1	1	1	0.0219	1	0.819	1	0.0258
E124_Monocytes-CD14+_RO01746_Primary_Cells_Blood_erc2-chromatin15state-all-files/E124_8_ZNF-Rpts.bed	1	1	1	1	1	1	1	1	1	1	1	1	1	1	1	1	1	1	1	1	0.836	1	1	1	1	1	1	0.588	1	1	0.183	1	1	0.996	1	1	1	0.627	0.712	1	1	1	1	1	0.544	1	1	1	1
E124_Monocytes-CD14+_RO01746_Primary_Cells_Blood_erc2-chromatin15state-all-files/E124_9_Het.bed	1	1	1	1	1	1	1	1	1	1	1	1	1	1	1	1	1	1	1	1	1	1	1	1	1	1	1	1	1	0.06	1	1	1	1	1	0.333	1	0.628	0.429	1	1	1	1	1	1	0.901	1	0.904	1
E124_Monocytes-CD14+_RO01746_Primary_Cells_Blood_erc2-chromatin15state-all-files/E124_10_TssBiv.bed	1	1	1	1	1	1	1	1	1	1	1	1	1	1	1	1	0.374	1	1	1	0.502	1	0.463	1	1	1	0.848	1	1	1	1	1	1	1	1	1	1	1	0.282	1	1	1	1	1	1	1	1	1	1
E124_Monocytes-CD14+_RO01746_Primary_Cells_Blood_erc2-chromatin15state-all-files/E124_11_BivFlnk.bed	1	0.733	1	0.264	1	1	0.788	1	1	0.0826	1	0.0269	1	1	1	1	0.048	1	1	1	0.0413	1	0.35	0.784	0.319	1	0.024	1	1	1	0.307	1	1	1	0.0886	1	0.0821	1	1	1	0.291	0.00727	1	0.0281	1	1	1	1	1
E124_Monocytes-CD14+_RO01746_Primary_Cells_Blood_erc2-chromatin15state-all-files/E124_12_EnhBiv.bed	1	1	1	0.865	1	1	1	0.441	1	1	1	0.221	1	1	1	1	0.46	1	1	1	0.0324	1	1	1	1	1	0.69	1	0.342	1	1	1	1	1	1	0.859	0.318	0.576	1	1	0.38	1	1	0.434	0.0244	1	0.526	1	0.394
E124_Monocytes-CD14+_RO01746_Primary_Cells_Blood_erc2-chromatin15state-all-files/E124_13_ReprPC.bed	1	0.384	1	0.0206	1	1	0.162	1	1	0.86	1	0.011	1	1	1	1	0.24	1	0.578	0.94	0.032	1	1	0.684	1	1	1	1	1	0.185	1	1	1	1	0.374	1	0.575	0.171	1	0.558	0.344	1	1	0.381	0.797	0.000539	1	1	0.769
E124_Monocytes-CD14+_RO01746_Primary_Cells_Blood_erc2-chromatin15state-all-files/E124_14_ReprPCWk.bed	1	1	1	0.351	1	1	0.92	1	1	1	1	0.031	1	1	0.781	1	1	1	1	1	0.129	1	1	0.392	1	1	1	1	1	0.212	1	1	1	1	0.657	1	0.615	0.955	0.0573	0.802	0.194	1	1	1	1	1	1	0.0467	0.582
E124_Monocytes-CD14+_RO01746_Primary_Cells_Blood_erc2-chromatin15state-all-files/E124_15_Quies.bed	1	0.197	1	1	1	1	1	1	1	1	1	1	0.0637	1	1	1	1	1	1	1	1	1	1	1	1	1	1	1	1	1	1	1	1	1	1	1	1	1	1	1	1	1	1	1	1	1	1	1	1
E129_Osteoblast_Primary_Cells_Bone_erc2-chromatin15state-all-files/E129_1_TssA.bed	1	0.572	1	0.0289	1	1	1	0.0056	1	0.482	0.966	0.00256	1	1	0.0727	1	0.0939	1	1	0.227	0.000158	1	0.27	1	0.957	1	0.0737	1	0.687	1	0.127	1	1	1	0.357	1	0.027	0.0218	0.141	1	0.187	0.987	1	0.854	0.704	0.536	0.881	1	0.954
E129_Osteoblast_Primary_Cells_Bone_erc2-chromatin15state-all-files/E129_2_TssAFlnk.bed	1	1	0.722	0.656	1	1	0.557	0.521	1	1	1	0.275	1	1	1	0.758	0.639	1	1	1	0.00258	1	1	1	0.326	1	1	1	0.202	1	0.559	1	1	1	0.708	1	0.0309	0.0221	0.506	1	1	1	1	0.373	0.225	0.835	0.685	1	0.673
E129_Osteoblast_Primary_Cells_Bone_erc2-chromatin15state-all-files/E129_3_TxFlnk.bed	1	1	1	1	1	1	1	0.254	1	0.636	1	0.0269	1	1	1	1	0.755	1	0.553	0.807	0.958	1	0.897	0.57	1	0.418	1	1	1	1	0.889	1	1	1	1	1	0.0125	0.964	0.562	0.594	1	1	1	1	0.707	1	1	1	0.194
E129_Osteoblast_Primary_Cells_Bone_erc2-chromatin15state-all-files/E129_4_Tx.bed	1	1	1	1	1	1	1	0.353	1	0.977	1	0.728	1	1	0.535	1	1	1	1	1	0.838	1	0.252	1	0.72	0.211	1	0.967	0.729	1	0.738	1	0.639	1	0.693	1	0.000563	0.998	1	1	1	1	1	1	0.185	1	1	1	1
E129_Osteoblast_Primary_Cells_Bone_erc2-chromatin15state-all-files/E129_5_TxWk.bed	0.854	1	1	0.127	0.913	1	1	0.000276	1	0.0151	1	0.2	1	1	0.814	1	0.0263	1	1	0.929	0.0027	1	0.937	1	1	1	0.243	0.279	0.318	1	0.0527	1	0.177	1	0.628	1	1.8e-06	1	1	1	1	1	1	1	0.41	0.752	1	1	0.486
E129_Osteoblast_Primary_Cells_Bone_erc2-chromatin15state-all-files/E129_6_EnhG.bed	1	1	1	1	1	1	1	0.725	1	1	1	0.221	1	1	1	1	0.941	1	1	1	0.164	1	1	1	0.458	0.0736	1	1	1	1	0.71	1	1	1	1	1	0.0321	1	0.925	1	1	1	1	1	0.399	1	1	1	0.943
E129_Osteoblast_Primary_Cells_Bone_erc2-chromatin15state-all-files/E129_7_Enh.bed	1	1	1	0.578	1	1	1	0.00253	1	1	0.207	0.0227	1	1	1	1	1	1	0.461	1	0.0275	1	1	1	0.0311	0.0683	1	0.803	1	1	0.754	1	0.346	1	0.839	1	0.00025	0.609	1	0.238	1	1	1	1	0.00472	0.0243	0.607	1	0.349
E129_Osteoblast_Primary_Cells_Bone_erc2-chromatin15state-all-files/E129_8_ZNF-Rpts.bed	1	1	1	1	1	1	1	1	1	1	1	1	1	1	1	1	1	1	1	1	0.34	1	1	1	0.801	1	1	1	1	1	1	1	1	1	1	1	1	0.908	1	1	1	1	1	1	1	1	1	1	1
E129_Osteoblast_Primary_Cells_Bone_erc2-chromatin15state-all-files/E129_9_Het.bed	1	1	1	1	1	1	1	1	1	1	1	1	1	1	1	1	1	1	1	1	1	1	1	1	1	1	1	1	1	1	1	1	1	1	1	0.186	1	0.727	0.925	1	1	1	1	1	1	1	1	1	1
E129_Osteoblast_Primary_Cells_Bone_erc2-chromatin15state-all-files/E129_10_TssBiv.bed	1	1	1	1	1	1	1	1	1	0.13	1	1	1	1	1	1	0.518	1	1	1	0.00857	1	0.684	1	1	1	0.416	1	1	1	1	1	1	1	0.425	1	0.000858	1	1	1	1	0.0905	1	1	1	1	0.756	1	0.46
E129_Osteoblast_Primary_Cells_Bone_erc2-chromatin15state-all-files/E129_11_BivFlnk.bed	1	1	1	1	1	1	1	1	1	1	1	0.0887	1	1	1	1	1	1	1	1	0.663	1	1	1	1	0.635	1	1	1	1	0.155	1	1	1	1	1	1	1	1	1	1	1	1	1	1	1	1	1	1
E129_Osteoblast_Primary_Cells_Bone_erc2-chromatin15state-all-files/E129_12_EnhBiv.bed	1	0.379	1	1	1	1	1	1	1	0.977	1	1	1	1	0.159	1	1	1	1	1	0.0888	1	0.394	1	1	1	1	1	1	1	1	1	1	1	1	1	0.176	1	1	1	1	1	1	1	1	0.763	1	1	1
E129_Osteoblast_Primary_Cells_Bone_erc2-chromatin15state-all-files/E129_13_ReprPC.bed	0.238	1	1	0.374	1	1	0.509	1	1	1	0.574	0.223	1	1	1	1	0.713	1	1	0.0168	1	1	0.93	0.531	0.781	0.736	1	1	0.786	1	1	1	1	0.29	0.954	0.114	1	0.727	1	1	0.142	1	0.226	1	1	1	1	1	0.0451
E129_Osteoblast_Primary_Cells_Bone_erc2-chromatin15state-all-files/E129_14_ReprPCWk.bed	0.278	1	1	0.702	1	1	0.227	1	1	1	0.968	0.979	1	1	0.00596	0.889	0.618	1	1	1	1	0.171	1	0.776	0.175	0.695	1	1	0.723	1	0.4	0.001	1	1	0.604	0.904	1	0.157	0.0902	1	0.434	1	1	1	1	0.977	1	1	1
E129_Osteoblast_Primary_Cells_Bone_erc2-chromatin15state-all-files/E129_15_Quies.bed	1	0.000604	1	1	1	1	1	1	1	0.951	1	1	0.315	1	1	1	1	1	1	1	1	1	1	1	1	1	0.605	1	1	0.0814	1	1	1	1	1	1	1	1	1	1	1	1	1	1	1	1	1	0.983	1
E067_Brain_Angular_Gyrus_Brain_erc2-chromatin15state-all-files/E067_1_TssA.bed	1	0.301	1	0.0994	1	1	1	0.448	1	0.0202	0.998	0.00751	1	1	0.493	1	0.0934	1	1	0.445	0.0129	1	0.326	0.694	1	1	0.101	1	0.704	1	0.221	1	1	1	0.338	1	0.0323	0.00269	0.37	1	0.272	0.135	1	1	0.536	0.231	0.78	1	1
E067_Brain_Angular_Gyrus_Brain_erc2-chromatin15state-all-files/E067_2_TssAFlnk.bed	1	0.969	0.535	1	1	1	1	0.134	1	1	1	0.319	1	1	0.0361	0.456	1	1	1	0.93	0.609	0.994	1	1	0.746	1	1	1	0.325	1	0.978	1	1	1	0.641	1	0.354	0.273	1	1	1	1	1	0.878	1	1	1	1	1
E067_Brain_Angular_Gyrus_Brain_erc2-chromatin15state-all-files/E067_3_TxFlnk.bed	1	1	1	1	1	1	1	1	1	1	1	1	1	1	1	1	1	1	0.35	1	1	1	1	1	1	1	1	1	1	1	1	1	1	1	1	0.915	0.0151	1	1	0.349	1	1	1	1	1	1	1	1	1
E067_Brain_Angular_Gyrus_Brain_erc2-chromatin15state-all-files/E067_4_Tx.bed	1	1	0.648	1	1	1	1	0.426	1	0.571	1	0.45	1	1	0.477	1	1	1	1	1	1	1	0.379	1	0.589	1	1	0.0815	0.318	1	0.465	1	0.245	1	0.29	1	0.257	0.544	1	1	1	1	1	1	1	1	1	1	0.936
E067_Brain_Angular_Gyrus_Brain_erc2-chromatin15state-all-files/E067_5_TxWk.bed	1	0.469	1	1	1	1	1	0.000988	1	0.0655	1	0.526	1	1	0.997	1	0.000422	1	1	1	0.0821	1	0.086	1	1	0.936	0.024	0.61	0.804	1	0.406	1	0.186	1	0.759	1	4.72e-05	0.877	0.817	1	1	1	1	1	0.129	0.87	1	1	1
E067_Brain_Angular_Gyrus_Brain_erc2-chromatin15state-all-files/E067_6_EnhG.bed	1	1	1	1	1	1	1	0.808	1	0.683	1	0.194	1	1	1	1	1	1	1	1	0.564	1	1	1	0.336	0.287	1	1	1	1	0.904	1	1	1	1	1	0.999	0.369	1	1	1	1	1	0.657	0.537	1	1	1	1
E067_Brain_Angular_Gyrus_Brain_erc2-chromatin15state-all-files/E067_7_Enh.bed	0.662	1	1	1	1	1	1	2.36e-05	1	0.688	1	0.0316	1	1	0.786	0.289	0.73	1	1	1	0.289	1	0.343	1	0.576	0.0562	1	0.359	0.637	1	0.989	1	0.512	1	1	0.252	0.982	0.732	0.225	1	0.961	1	1	1	0.00586	1	1	1	0.758
E067_Brain_Angular_Gyrus_Brain_erc2-chromatin15state-all-files/E067_8_ZNF-Rpts.bed	1	1	1	1	1	1	1	1	1	0.194	1	1	1	1	1	1	1	1	1	1	0.36	1	1	1	0.851	1	1	1	1	1	0.793	1	1	1	1	1	1	0.933	1	1	1	1	1	1	1	1	1	1	1
E067_Brain_Angular_Gyrus_Brain_erc2-chromatin15state-all-files/E067_9_Het.bed	1	1	1	1	1	1	0.656	1	1	1	1	1	1	1	1	1	1	1	1	0.269	0.785	1	1	1	0.883	1	1	1	1	1	0.969	1	1	1	1	0.52	1	0.902	0.282	1	0.611	1	1	1	1	1	1	1	1
E067_Brain_Angular_Gyrus_Brain_erc2-chromatin15state-all-files/E067_10_TssBiv.bed	1	0.0503	1	1	1	1	1	0.549	1	0.143	1	0.133	1	1	1	1	0.136	1	0.493	1	0.058	1	0.678	1	1	0.243	1	1	0.529	1	0.662	1	1	1	1	1	0.844	1	1	0.477	1	1	1	0.247	1	1	1	1	0.123
E067_Brain_Angular_Gyrus_Brain_erc2-chromatin15state-all-files/E067_11_BivFlnk.bed	1	1	1	1	1	1	1	1	1	1	1	1	1	1	1	1	1	1	1	1	0.332	1	1	1	1	1	1	1	1	1	1	1	1	1	1	1	1	1	1	1	1	1	1	1	1	1	1	1	1
E067_Brain_Angular_Gyrus_Brain_erc2-chromatin15state-all-files/E067_12_EnhBiv.bed	0.494	0.621	1	0.314	1	1	1	1	1	1	1	1	1	1	1	1	1	1	1	1	0.0953	1	1	1	0.523	0.47	1	0.457	1	1	1	1	1	1	0.274	1	1	0.558	1	1	1	1	1	0.113	1	1	1	1	1
E067_Brain_Angular_Gyrus_Brain_erc2-chromatin15state-all-files/E067_13_ReprPC.bed	1	1	1	0.0176	1	1	0.139	0.602	1	0.769	1	0.00221	1	1	1	1	0.0338	1	0.176	0.0943	0.0129	1	0.545	0.487	0.00572	0.809	1	1	1	1	1	1	0.976	1	1	1	0.0404	0.646	1	0.121	0.167	1	1	1	0.414	0.0301	1	1	0.368
E067_Brain_Angular_Gyrus_Brain_erc2-chromatin15state-all-files/E067_14_ReprPCWk.bed	1	1	1	0.132	1	0.266	0.0753	1	1	1	1	0.709	1	1	0.0791	1	0.824	1	1	0.0723	0.96	1	1	0.475	0.819	1	1	1	0.729	0.123	0.796	1	1	0.249	1	0.495	0.62	0.933	1	1	0.0321	1	1	1	1	0.11	1	0.0368	0.413
E067_Brain_Angular_Gyrus_Brain_erc2-chromatin15state-all-files/E067_15_Quies.bed	1	1	1	1	1	1	1	1	1	1	1	1	0.556	1	1	1	1	1	1	1	1	1	1	1	1	1	1	1	1	1	1	1	1	1	1	1	1	1	1	1	1	1	1	1	1	1	1	1	1
E068_Brain_Anterior_Caudate_Brain_erc2-chromatin15state-all-files/E068_1_TssA.bed	1	0.0861	1	0.266	1	1	1	0.214	1	0.0899	0.853	0.00221	1	1	0.221	1	0.229	1	1	0.14	0.0274	0.392	0.532	0.759	0.807	1	0.024	1	0.529	1	0.299	1	0.987	1	0.376	1	0.0166	0.00218	0.225	1	0.355	0.173	1	1	0.135	0.542	0.819	1	0.937
E068_Brain_Anterior_Caudate_Brain_erc2-chromatin15state-all-files/E068_2_TssAFlnk.bed	1	0.718	0.618	1	1	1	1	0.598	1	1	1	0.11	1	1	0.277	0.57	1	1	1	1	1	1	1	1	0.975	1	1	1	0.486	1	0.661	1	1	1	0.488	1	0.486	0.927	1	1	1	1	1	1	1	1	0.709	1	1
E068_Brain_Anterior_Caudate_Brain_erc2-chromatin15state-all-files/E068_3_TxFlnk.bed	1	1	1	1	1	1	1	1	1	1	1	0.35	1	1	1	1	1	1	1	1	0.635	1	1	1	1	1	0.982	1	1	1	1	1	0.577	1	1	1	0.681	1	1	1	1	1	1	1	1	1	1	1	0.447
E068_Brain_Anterior_Caudate_Brain_erc2-chromatin15state-all-files/E068_4_Tx.bed	1	1	0.762	1	1	1	1	0.691	1	0.668	1	0.305	1	1	1	1	1	1	1	1	0.883	1	0.508	1	0.531	1	1	0.495	0.705	1	0.135	1	1	1	0.593	0.865	0.502	0.395	1	1	1	1	1	1	0.185	1	1	1	1
E068_Brain_Anterior_Caudate_Brain_erc2-chromatin15state-all-files/E068_5_TxWk.bed	1	0.853	1	0.758	0.156	1	1	2.74e-05	1	0.0397	0.91	0.888	1	1	0.599	1	0.00596	1	1	0.853	0.0122	1	0.0645	1	1	0.906	0.34	0.389	0.478	1	0.645	1	0.32	1	0.423	1	1.2e-06	1	1	1	1	1	1	1	0.237	0.58	1	1	1
E068_Brain_Anterior_Caudate_Brain_erc2-chromatin15state-all-files/E068_6_EnhG.bed	1	1	1	0.705	1	1	1	0.313	1	1	1	0.405	1	1	1	1	0.169	1	1	1	1	1	1	1	1	0.151	1	0.9	0.741	1	1	1	0.511	1	1	1	0.446	0.876	0.952	1	1	1	1	0.733	1	0.968	1	1	0.774
E068_Brain_Anterior_Caudate_Brain_erc2-chromatin15state-all-files/E068_7_Enh.bed	0.822	1	1	1	1	1	1	4.71e-05	1	0.108	1	0.0639	1	1	1	1	0.882	1	1	1	0.186	1	0.26	1	0.101	0.114	1	0.956	0.78	1	1	1	0.116	1	1	0.578	0.986	1	0.778	1	1	1	1	1	0.0575	1	1	1	0.937
E068_Brain_Anterior_Caudate_Brain_erc2-chromatin15state-all-files/E068_8_ZNF-Rpts.bed	1	1	1	1	1	1	1	1	1	0.666	1	1	1	1	0.463	1	1	1	1	1	0.948	1	1	1	0.93	1	1	1	1	1	0.905	1	1	1	0.653	1	1	1	1	1	1	1	1	1	1	1	1	1	1
E068_Brain_Anterior_Caudate_Brain_erc2-chromatin15state-all-files/E068_9_Het.bed	1	1	1	1	1	1	0.657	1	1	1	1	1	1	1	1	1	1	1	1	1	0.765	1	1	1	0.597	1	1	1	1	0.000246	0.386	1	1	1	1	1	1	0.911	0.927	1	0.767	1	1	1	1	1	1	0.0155	1
E068_Brain_Anterior_Caudate_Brain_erc2-chromatin15state-all-files/E068_10_TssBiv.bed	1	1	1	1	1	1	1	1	1	0.925	0.838	0.455	1	1	1	1	1	1	0.507	0.626	0.0785	1	0.721	1	0.735	0.784	1	1	0.535	1	1	1	1	1	1	1	0.00861	0.792	1	0.52	1	1	1	1	1	1	1	1	0.131
E068_Brain_Anterior_Caudate_Brain_erc2-chromatin15state-all-files/E068_11_BivFlnk.bed	1	1	1	1	1	1	1	0.381	1	0.228	1	1	1	1	1	1	0.00806	1	1	1	1	1	0.559	1	1	0.522	1	1	1	1	1	1	1	1	1	1	1	1	1	1	1	1	1	0.00402	1	1	1	1	1
E068_Brain_Anterior_Caudate_Brain_erc2-chromatin15state-all-files/E068_12_EnhBiv.bed	0.58	0.709	1	0.362	1	1	1	1	1	1	1	1	1	1	1	1	1	1	1	1	0.571	1	1	1	1	0.598	1	1	1	1	1	1	1	1	1	1	0.184	1	1	1	1	1	1	1	0.367	1	1	1	1
E068_Brain_Anterior_Caudate_Brain_erc2-chromatin15state-all-files/E068_13_ReprPC.bed	1	1	1	0.00819	1	1	1	1	1	0.409	1	0.0648	1	1	1	1	0.0136	1	0.149	0.0701	0.00119	1	0.684	0.409	0.233	0.962	0.575	0.703	1	1	1	1	0.872	1	0.468	1	0.395	0.165	1	0.106	0.033	1	1	1	1	0.0682	1	1	0.292
E068_Brain_Anterior_Caudate_Brain_erc2-chromatin15state-all-files/E068_14_ReprPCWk.bed	0.568	1	1	0.43	1	0.523	0.148	1	1	1	1	0.646	1	0.335	0.38	1	1	1	1	0.905	1	1	1	1	1	1	1	1	1	0.272	0.907	0.947	1	1	1	0.677	1	1	0.156	1	0.745	1	1	1	1	0.0136	1	0.157	1
E068_Brain_Anterior_Caudate_Brain_erc2-chromatin15state-all-files/E068_15_Quies.bed	1	1	1	1	1	1	1	1	1	1	0.812	1	1	1	1	1	1	1	1	1	1	1	1	1	1	1	1	1	1	1	1	1	1	1	1	1	1	1	1	1	1	1	1	1	1	1	1	1	1
E069_Brain_Cingulate_Gyrus_Brain_erc2-chromatin15state-all-files/E069_1_TssA.bed	1	0.358	1	0.0674	1	1	1	0.185	1	0.184	0.939	0.00729	1	1	0.125	1	0.0566	1	1	0.347	0.0199	1	0.484	1	0.981	1	0.165	1	0.233	1	0.038	1	0.468	1	0.491	1	0.429	0.0054	0.281	1	0.862	1	1	1	0.132	0.542	1	1	1
E069_Brain_Cingulate_Gyrus_Brain_erc2-chromatin15state-all-files/E069_2_TssAFlnk.bed	1	0.621	1	1	1	1	1	0.462	1	1	1	0.112	1	1	0.221	1	0.584	1	1	0.591	1	1	1	1	0.905	1	1	1	0.689	1	0.713	1	0.509	1	0.75	1	0.0304	0.351	1	1	1	1	1	1	1	0.961	0.607	1	1
E069_Brain_Cingulate_Gyrus_Brain_erc2-chromatin15state-all-files/E069_3_TxFlnk.bed	1	1	1	1	1	1	1	0.385	1	1	1	1	1	1	1	1	1	1	0.406	1	1	1	1	1	1	1	1	1	1	1	1	1	1	1	1	1	0.548	1	1	0.392	1	1	1	1	1	1	1	1	0.375
E069_Brain_Cingulate_Gyrus_Brain_erc2-chromatin15state-all-files/E069_4_Tx.bed	1	1	1	1	1	1	1	0.356	1	0.253	1	0.482	1	1	0.363	1	1	1	1	1	0.993	1	0.17	1	0.574	1	1	0.6	0.354	1	0.0165	1	0.64	1	0.399	0.379	0.0851	0.688	1	1	1	1	1	1	0.52	1	0.819	1	1
E069_Brain_Cingulate_Gyrus_Brain_erc2-chromatin15state-all-files/E069_5_TxWk.bed	1	1	1	0.192	1	1	1	0.00251	1	0.0426	1	0.195	1	0.851	1	1	0.00674	1	1	0.994	0.0269	1	0.0613	1	1	0.552	0.024	0.537	0.305	1	0.676	1	0.621	1	0.5	1	0.00595	0.85	0.957	1	1	1	1	1	0.0822	0.901	1	1	1
E069_Brain_Cingulate_Gyrus_Brain_erc2-chromatin15state-all-files/E069_6_EnhG.bed	1	1	1	1	1	1	1	1	1	1	1	0.934	1	1	1	0.844	0.56	1	1	1	0.564	0.704	1	1	1	0.00375	1	0.834	0.711	1	1	1	0.939	1	1	1	0.792	0.434	1	1	1	1	1	1	0.734	1	1	1	1
E069_Brain_Cingulate_Gyrus_Brain_erc2-chromatin15state-all-files/E069_7_Enh.bed	1	0.769	0.65	1	1	0.877	1	4.02e-05	1	0.856	0.923	0.0216	1	1	0.915	0.412	0.848	1	1	1	0.259	1	0.643	1	0.897	0.303	1	0.321	0.955	1	1	1	0.498	1	0.637	0.354	1	1	0.222	1	1	1	1	1	0.0546	0.902	0.756	1	0.756
E069_Brain_Cingulate_Gyrus_Brain_erc2-chromatin15state-all-files/E069_8_ZNF-Rpts.bed	1	1	1	1	1	1	1	1	1	1	1	1	1	1	0.367	1	1	1	1	1	0.416	1	1	1	0.884	1	1	1	1	1	0.836	1	1	1	1	1	1	0.947	1	1	1	1	1	1	1	1	1	1	1
E069_Brain_Cingulate_Gyrus_Brain_erc2-chromatin15state-all-files/E069_9_Het.bed	1	1	1	1	1	1	0.872	1	1	0.547	1	1	1	1	1	1	1	1	1	1	1	1	1	1	1	1	1	1	1	0.0134	0.187	1	1	1	0.707	0.653	1	0.673	0.0651	1	1	1	1	1	1	1	1	1	1
E069_Brain_Cingulate_Gyrus_Brain_erc2-chromatin15state-all-files/E069_10_TssBiv.bed	1	0.948	0.618	1	1	1	0.654	1	1	0.618	1	0.208	1	1	1	0.494	1	1	1	1	0.0115	0.38	0.836	0.555	1	0.126	0.024	1	1	1	0.825	1	1	1	0.5	1	0.0329	0.888	1	1	0.191	0.00152	1	1	1	1	1	1	0.179
E069_Brain_Cingulate_Gyrus_Brain_erc2-chromatin15state-all-files/E069_11_BivFlnk.bed	1	1	1	0.381	1	1	1	0.465	1	0.35	1	0.414	1	1	1	1	0.106	1	1	1	0.184	1	0.655	1	1	0.212	1	0.613	1	1	1	1	1	1	0.398	1	0.278	1	1	1	1	1	1	0.00712	0.412	1	1	1	1
E069_Brain_Cingulate_Gyrus_Brain_erc2-chromatin15state-all-files/E069_12_EnhBiv.bed	0.734	1	1	1	1	1	0.631	1	1	1	0.0446	1	1	1	1	1	0.661	1	1	1	0.1	1	1	1	0.794	0.809	1	1	1	1	0.738	1	1	1	1	1	1	0.0524	1	1	1	1	1	1	1	1	1	1	0.597
E069_Brain_Cingulate_Gyrus_Brain_erc2-chromatin15state-all-files/E069_13_ReprPC.bed	1	0.845	1	0.0438	1	1	0.0673	1	1	0.994	1	0.0375	1	1	0.822	1	0.0923	0.87	0.116	1	0.0413	1	0.986	0.835	0.56	1	1	1	0.6	1	1	1	1	1	1	1	0.0258	0.595	1	0.106	0.0812	1	1	1	0.71	0.0124	1	1	0.0427
E069_Brain_Cingulate_Gyrus_Brain_erc2-chromatin15state-all-files/E069_14_ReprPCWk.bed	0.0657	1	1	0.377	0.0974	0.0457	0.162	1	1	1	1	0.369	1	0.328	0.159	1	1	1	1	0.853	1	0.893	1	1	1	1	1	1	1	0.288	1	1	1	0.478	0.916	0.0295	1	0.924	0.952	1	0.724	1	0.898	1	1	0.314	1	0.423	1
E069_Brain_Cingulate_Gyrus_Brain_erc2-chromatin15state-all-files/E069_15_Quies.bed	1	1	1	1	1	1	1	1	1	1	0.998	1	0.25	1	1	1	1	1	1	1	1	1	1	1	1	1	1	1	1	1	1	1	1	1	1	1	1	1	1	1	1	1	1	1	1	1	1	1	1
E070_Brain_Germinal_Matrix_Brain_erc2-chromatin15state-all-files/E070_1_TssA.bed	1	0.299	1	0.176	1	1	0.905	0.481	1	0.262	1	0.756	1	1	1	1	0.0967	1	1	0.985	0.331	1	0.618	1	0.372	1	0.0601	1	0.702	1	0.266	1	1	1	1	1	0.376	0.0623	0.272	1	0.0811	1	1	1	1	0.334	1	1	1
E070_Brain_Germinal_Matrix_Brain_erc2-chromatin15state-all-files/E070_2_TssAFlnk.bed	1	0.189	1	1	1	1	1	0.0092	1	0.066	1	0.09	1	1	0.0539	1	0.805	1	1	0.962	0.258	1	0.556	1	1	1	1	1	0.167	1	1	1	0.424	1	1	1	0.135	0.924	1	1	0.726	1	1	1	0.622	1	0.866	1	0.899
E070_Brain_Germinal_Matrix_Brain_erc2-chromatin15state-all-files/E070_3_TxFlnk.bed	1	1	1	1	1	1	1	1	1	1	1	0.423	1	1	1	1	1	1	1	1	1	1	1	1	1	0.685	1	1	1	1	0.21	1	1	1	1	1	1	1	1	1	1	1	1	1	1	1	0.287	1	0.486
E070_Brain_Germinal_Matrix_Brain_erc2-chromatin15state-all-files/E070_4_Tx.bed	1	1	1	1	1	1	1	0.321	1	0.313	1	0.618	1	1	0.0438	1	1	1	1	1	1	1	0.0397	1	1	1	0.656	0.0655	0.46	1	0.234	1	0.346	1	0.468	1	0.0378	0.161	0.925	1	1	1	1	1	0.222	1	1	1	0.908
E070_Brain_Germinal_Matrix_Brain_erc2-chromatin15state-all-files/E070_5_TxWk.bed	1	0.943	1	1	1	1	1	0.000953	1	0.000203	0.861	0.126	1	1	1	1	0.0464	1	1	1	0.297	1	0.0613	1	1	1	0.307	1	0.354	1	1	1	1	1	1	1	0.00335	1	1	1	1	1	1	1	0.0404	0.442	1	1	1
E070_Brain_Germinal_Matrix_Brain_erc2-chromatin15state-all-files/E070_6_EnhG.bed	1	1	0.158	1	1	1	0.89	1	1	1	1	0.041	1	1	0.341	0.156	1	1	1	1	0.566	0.056	0.685	1	1	0.733	1	1	0.431	1	1	1	1	0.124	1	1	1	0.16	0.534	1	1	1	1	1	0.897	1	0.941	1	0.409
E070_Brain_Germinal_Matrix_Brain_erc2-chromatin15state-all-files/E070_7_Enh.bed	1	0.072	1	1	1	1	1	0.549	1	0.0828	1	0.132	1	1	1	1	1	1	1	1	0.949	1	0.327	1	0.833	0.733	1	0.984	1	1	0.724	1	1	1	1	1	0.439	1	1	1	1	1	1	1	0.803	0.21	1	1	0.922
E070_Brain_Germinal_Matrix_Brain_erc2-chromatin15state-all-files/E070_8_ZNF-Rpts.bed	1	1	1	1	1	1	1	1	1	1	1	1	1	1	0.666	1	1	1	1	1	0.588	1	1	1	0.476	1	1	1	1	1	0.0819	1	1	1	1	1	1	0.961	0.925	1	1	1	1	1	1	1	1	1	1
E070_Brain_Germinal_Matrix_Brain_erc2-chromatin15state-all-files/E070_9_Het.bed	1	1	1	1	1	1	0.654	1	1	1	1	1	1	1	1	1	1	1	1	1	1	1	1	1	1	1	1	1	1	0.304	1	1	1	1	0.774	0.44	1	1	0.13	1	1	1	1	1	1	1	1	1	1
E070_Brain_Germinal_Matrix_Brain_erc2-chromatin15state-all-files/E070_10_TssBiv.bed	1	0.673	0.722	0.229	1	1	1	0.479	1	0.404	0.64	2.83e-05	1	1	1	0.63	0.919	1	1	1	0.0107	0.392	0.343	1	1	0.696	0.0573	1	0.167	1	0.569	1	1	1	0.203	1	0.0404	0.998	1	1	1	1	1	1	0.399	1	1	1	1
E070_Brain_Germinal_Matrix_Brain_erc2-chromatin15state-all-files/E070_11_BivFlnk.bed	1	0.243	1	1	1	1	1	0.988	1	0.533	1	0.119	1	0.902	0.148	1	0.126	1	1	1	0.0477	1	0.528	0.603	0.949	0.613	0.246	1	0.775	1	0.954	1	1	1	0.212	1	0.252	0.011	1	1	1	0.0031	1	0.0217	0.784	0.95	0.858	1	0.797
E070_Brain_Germinal_Matrix_Brain_erc2-chromatin15state-all-files/E070_12_EnhBiv.bed	0.943	0.287	1	0.195	1	1	1	1	1	0.451	1	1	1	1	1	1	0.317	1	0.658	1	0.0995	1	1	1	0.523	0.494	1	0.908	1	1	1	1	1	1	0.582	1	0.385	0.145	1	0.752	0.3	1	1	1	1	0.376	0.847	1	0.724
E070_Brain_Germinal_Matrix_Brain_erc2-chromatin15state-all-files/E070_13_ReprPC.bed	1	1	1	0.00351	0.00313	1	0.0883	0.995	1	0.635	1	0.0192	1	1	1	1	0.673	1	0.461	0.14	0.0425	1	1	0.526	0.322	0.553	1	1	0.712	1	1	1	0.99	0.0529	1	1	0.0554	0.358	1	0.445	0.204	1	1	1	1	0.442	1	1	0.153
E070_Brain_Germinal_Matrix_Brain_erc2-chromatin15state-all-files/E070_14_ReprPCWk.bed	0.626	1	1	1	1	1	1	0.637	1	1	1	0.831	1	1	0.0206	1	1	0.0123	1	0.518	0.458	0.824	1	1	0.227	0.874	1	1	0.675	1	0.038	0.00423	1	1	0.637	0.114	1	0.361	0.692	1	1	1	0.132	1	0.227	0.654	1	1	0.34
E070_Brain_Germinal_Matrix_Brain_erc2-chromatin15state-all-files/E070_15_Quies.bed	1	1	1	1	1	1	1	1	1	1	1	1	0.0851	1	1	1	1	1	1	1	1	1	1	1	1	1	1	1	1	0.528	1	1	1	1	1	1	1	1	1	0.939	1	1	1	1	1	1	1	1	1
E071_Brain_Hippocampus_Middle_Brain_erc2-chromatin15state-all-files/E071_1_TssA.bed	1	0.158	1	0.0299	1	1	1	0.193	1	0.394	0.939	0.0305	1	1	0.454	1	0.0304	1	1	0.0767	0.19	1	0.72	1	0.424	0.93	0.0235	1	1	1	0.0244	1	1	1	0.526	1	0.00885	0.0313	0.134	1	0.26	1	1	1	0.245	1	1	1	1
E071_Brain_Hippocampus_Middle_Brain_erc2-chromatin15state-all-files/E071_2_TssAFlnk.bed	1	0.845	1	1	1	1	1	0.247	1	1	1	0.0448	1	1	0.298	0.57	0.787	1	1	0.351	0.299	1	1	1	1	1	1	0.971	0.0866	1	1	1	0.351	1	0.899	1	0.477	0.0864	1	1	1	1	1	1	1	0.542	1	1	1
E071_Brain_Hippocampus_Middle_Brain_erc2-chromatin15state-all-files/E071_3_TxFlnk.bed	1	1	1	1	1	1	1	1	1	0.726	1	0.371	1	1	0.148	1	1	1	0.461	1	1	1	1	1	1	1	1	1	1	1	0.631	1	1	1	1	1	0.233	1	1	0.437	1	1	1	1	1	1	1	1	0.427
E071_Brain_Hippocampus_Middle_Brain_erc2-chromatin15state-all-files/E071_4_Tx.bed	1	1	0.762	1	1	1	1	0.371	1	0.588	1	0.66	1	1	0.531	1	1	1	1	1	1	1	0.561	1	0.462	1	1	0.32	0.5	1	0.0677	1	0.899	1	0.371	0.749	0.0501	0.292	0.895	1	1	1	1	1	0.311	1	1	1	1
E071_Brain_Hippocampus_Middle_Brain_erc2-chromatin15state-all-files/E071_5_TxWk.bed	0.646	0.851	1	0.314	0.536	1	1	0.000601	1	0.0261	0.574	0.432	1	1	0.363	1	0.0122	1	1	1	0.0316	1	0.0471	1	1	1	0.246	0.781	0.922	1	0.883	1	0.244	1	0.894	1	0.000129	0.818	1	1	1	1	1	1	0.316	1	1	1	1
E071_Brain_Hippocampus_Middle_Brain_erc2-chromatin15state-all-files/E071_6_EnhG.bed	1	1	1	1	1	1	1	0.207	1	0.897	1	0.158	1	1	1	1	1	1	1	1	0.131	1	0.597	1	0.916	0.11	1	0.984	1	1	0.924	1	1	1	1	1	0.855	0.799	1	1	1	1	1	0.888	0.876	0.721	0.819	1	0.816
E071_Brain_Hippocampus_Middle_Brain_erc2-chromatin15state-all-files/E071_7_Enh.bed	1	1	0.709	1	1	1	1	8.23e-05	1	0.612	1	0.0375	1	1	1	0.289	0.824	1	1	1	0.544	1	0.826	1	0.354	0.0758	1	1	0.598	1	1	1	0.37	1	0.805	0.424	1	1	0.48	1	1	1	1	1	0.00165	0.213	0.83	1	0.603
E071_Brain_Hippocampus_Middle_Brain_erc2-chromatin15state-all-files/E071_8_ZNF-Rpts.bed	1	1	1	1	1	1	1	1	1	0.763	1	0.845	1	1	0.508	1	1	1	1	1	0.594	1	1	1	0.975	1	1	1	1	1	0.963	1	1	1	1	1	1	0.802	1	1	1	1	1	1	1	1	1	1	1
E071_Brain_Hippocampus_Middle_Brain_erc2-chromatin15state-all-files/E071_9_Het.bed	1	1	1	1	1	1	0.872	1	1	0.506	1	1	1	1	1	1	1	1	1	1	0.848	1	1	1	1	1	1	1	0.955	0.244	0.692	1	1	1	0.947	1	1	0.921	0.261	1	0.558	1	1	1	1	0.976	1	1	1
E071_Brain_Hippocampus_Middle_Brain_erc2-chromatin15state-all-files/E071_10_TssBiv.bed	1	1	1	1	1	1	1	1	1	0.296	0.962	0.608	1	1	1	1	0.076	1	1	1	0.011	1	0.363	0.603	1	0.906	0.0888	1	1	1	0.805	1	1	1	0.5	1	0.00163	1	1	1	1	0.0031	1	1	1	1	1	1	0.043
E071_Brain_Hippocampus_Middle_Brain_erc2-chromatin15state-all-files/E071_11_BivFlnk.bed	0.939	0.358	0.535	1	1	1	1	0.655	1	0.231	1	0.172	1	1	1	0.412	0.654	1	1	1	1.62e-05	0.335	0.808	0.487	1	0.331	1	1	0.165	1	1	1	1	1	1	1	0.986	0.799	1	1	1	1	1	0.262	1	1	1	1	1
E071_Brain_Hippocampus_Middle_Brain_erc2-chromatin15state-all-files/E071_12_EnhBiv.bed	1	1	1	0.57	1	1	1	0.701	1	0.328	0.968	0.674	1	1	1	1	1	1	0.661	1	0.92	1	1	1	0.853	0.114	1	0.869	1	1	0.825	1	1	1	0.542	1	0.533	0.91	0.244	0.628	1	1	1	0.25	0.622	1	0.78	1	1
E071_Brain_Hippocampus_Middle_Brain_erc2-chromatin15state-all-files/E071_13_ReprPC.bed	1	1	1	0.00955	1	1	0.446	1	1	1	1	0.0202	1	1	0.739	1	0.216	1	0.305	0.487	0.346	1	0.618	0.338	1	1	1	1	0.856	1	1	1	1	1	1	1	0.0345	0.101	1	0.295	0.067	1	1	1	0.994	0.00675	1	1	0.149
E071_Brain_Hippocampus_Middle_Brain_erc2-chromatin15state-all-files/E071_14_ReprPCWk.bed	0.123	1	1	0.331	1	0.202	0.00795	1	1	1	1	0.483	1	0.132	0.0361	1	1	0.432	1	0.96	1	1	1	1	0.915	1	1	1	0.903	1	1	1	1	0.108	1	0.414	1	0.572	1	1	0.253	1	1	0.94	1	0.0833	1	1	0.756
E071_Brain_Hippocampus_Middle_Brain_erc2-chromatin15state-all-files/E071_15_Quies.bed	1	1	1	1	1	1	1	1	1	1	1	1	0.632	1	1	1	1	1	1	1	1	1	1	1	1	1	1	1	1	0.0634	1	1	1	1	1	1	1	1	1	1	1	1	1	1	1	1	1	1	1
E072_Brain_Inferior_Temporal_Lobe_Brain_erc2-chromatin15state-all-files/E072_1_TssA.bed	1	0.205	1	0.103	1	1	1	0.281	1	0.276	1	0.0176	1	1	0.553	1	0.317	1	1	0.472	0.193	1	0.453	1	0.929	1	0.0235	1	0.961	1	0.0885	1	1	1	0.61	1	0.012	0.0221	0.46	1	1	1	1	1	0.194	0.712	1	1	1
E072_Brain_Inferior_Temporal_Lobe_Brain_erc2-chromatin15state-all-files/E072_2_TssAFlnk.bed	1	1	0.535	1	1	1	1	0.76	1	1	1	0.0354	1	1	0.0438	0.488	0.602	1	1	1	0.14	1	1	1	0.901	1	1	1	0.698	1	0.745	1	0.512	1	0.741	1	0.51	0.367	1	1	1	1	1	0.997	1	0.946	0.666	1	1
E072_Brain_Inferior_Temporal_Lobe_Brain_erc2-chromatin15state-all-files/E072_3_TxFlnk.bed	1	1	1	1	1	1	1	0.408	1	1	1	0.335	1	1	1	1	1	1	0.388	0.446	1	1	1	1	1	0.564	1	1	1	1	0.541	1	1	1	1	1	0.0416	1	1	0.392	1	1	1	1	1	1	1	1	0.405
E072_Brain_Inferior_Temporal_Lobe_Brain_erc2-chromatin15state-all-files/E072_4_Tx.bed	1	1	0.767	1	1	1	1	0.596	1	0.776	1	0.522	1	1	0.159	1	1	1	1	1	1	1	0.62	1	0.444	1	1	0.423	0.275	1	0.223	1	0.637	1	0.39	0.52	0.425	0.609	1	1	1	1	1	1	0.414	1	1	1	1
E072_Brain_Inferior_Temporal_Lobe_Brain_erc2-chromatin15state-all-files/E072_5_TxWk.bed	0.94	0.241	1	1	1	1	1	0.00389	1	0.00977	1	0.58	1	1	1	1	0.00932	1	1	1	0.00169	1	0.0377	1	1	0.614	0.174	0.564	0.575	1	0.746	1	0.168	1	0.542	1	0.000132	1	1	1	1	1	1	1	0.242	1	1	1	0.929
E072_Brain_Inferior_Temporal_Lobe_Brain_erc2-chromatin15state-all-files/E072_6_EnhG.bed	1	1	1	1	1	1	1	0.698	1	1	1	0.73	1	1	1	1	0.979	1	1	1	0.734	1	1	1	1	0.178	1	0.908	1	1	1	1	1	1	1	1	0.222	0.535	0.323	1	1	1	1	0.81	0.815	1	1	1	0.46
E072_Brain_Inferior_Temporal_Lobe_Brain_erc2-chromatin15state-all-files/E072_7_Enh.bed	1	1	1	1	1	1	1	1.16e-05	1	0.561	0.962	0.0293	1	1	0.813	0.15	1	1	1	1	0.514	1	0.154	1	0.645	0.385	1	0.395	0.354	1	0.977	1	1	1	1	0.538	1	0.91	0.138	1	0.582	1	1	1	0.052	0.779	0.802	1	0.398
E072_Brain_Inferior_Temporal_Lobe_Brain_erc2-chromatin15state-all-files/E072_8_ZNF-Rpts.bed	1	1	1	0.663	1	1	1	1	1	0.373	1	1	1	1	1	1	1	1	1	1	0.528	1	1	1	0.957	0.921	1	1	1	1	0.439	1	1	1	1	1	1	1	1	1	1	1	1	1	0.685	1	1	1	1
E072_Brain_Inferior_Temporal_Lobe_Brain_erc2-chromatin15state-all-files/E072_9_Het.bed	1	1	1	1	1	1	0.139	1	1	0.765	1	1	1	1	1	1	1	1	1	1	0.182	1	1	1	1	1	1	1	0.903	0.499	0.284	1	1	1	1	0.622	1	0.791	0.121	1	0.907	1	1	1	1	1	1	1	1
E072_Brain_Inferior_Temporal_Lobe_Brain_erc2-chromatin15state-all-files/E072_10_TssBiv.bed	1	1	1	1	1	1	0.656	1	1	0.235	1	0.186	1	1	1	1	1	1	1	1	0.00176	1	1	1	1	0.845	1	1	1	1	0.778	1	1	1	0.452	1	0.02	0.843	1	1	0.212	0.00152	1	1	1	1	1	1	1
E072_Brain_Inferior_Temporal_Lobe_Brain_erc2-chromatin15state-all-files/E072_11_BivFlnk.bed	0.664	1	1	1	1	1	1	1	1	0.317	1	1	1	1	1	1	0.0124	1	1	1	0.00526	1	0.562	1	1	1	1	1	0.462	1	1	1	0.612	1	1	1	0.0559	0.614	1	1	1	1	1	0.163	1	1	1	1	1
E072_Brain_Inferior_Temporal_Lobe_Brain_erc2-chromatin15state-all-files/E072_12_EnhBiv.bed	1	0.826	1	1	1	1	1	1	0.857	0.787	1	0.432	1	1	1	1	1	1	1	1	0.189	1	1	1	1	0.68	1	1	1	1	0.584	1	1	1	1	1	1	1	1	1	1	1	1	0.147	1	1	1	1	0.447
E072_Brain_Inferior_Temporal_Lobe_Brain_erc2-chromatin15state-all-files/E072_13_ReprPC.bed	1	1	1	0.00574	1	1	0.377	1	1	1	1	0.0635	1	1	1	1	0.136	1	0.105	0.347	0.0189	1	0.699	0.603	0.722	0.223	0.835	0.956	1	1	1	1	0.637	1	0.637	1	0.0378	0.337	1	0.065	0.194	1	1	0.928	1	0.207	1	1	0.105
E072_Brain_Inferior_Temporal_Lobe_Brain_erc2-chromatin15state-all-files/E072_14_ReprPCWk.bed	0.0827	1	1	0.0444	0.0903	1	0.374	1	1	1	0.752	0.449	1	1	0.0791	1	0.728	0.348	1	0.0702	1	1	1	0.978	0.0757	1	1	0.804	0.606	0.539	0.989	1	1	0.705	0.794	0.52	1	0.922	0.682	1	0.724	1	1	1	0.766	0.226	1	1	1
E072_Brain_Inferior_Temporal_Lobe_Brain_erc2-chromatin15state-all-files/E072_15_Quies.bed	1	1	1	1	1	1	1	1	1	1	1	1	0.288	1	1	1	1	1	1	1	1	1	1	1	1	1	0.874	1	1	1	1	1	1	1	1	1	1	1	1	1	1	1	1	1	1	1	1	1	1
E073_Brain_Dorsolateral_Prefrontal_Cortex_Brain_erc2-chromatin15state-all-files/E073_1_TssA.bed	1	0.201	1	0.11	1	1	1	0.512	1	0.296	1	0.00951	1	1	0.191	1	0.202	1	1	0.117	0.00553	1	0.343	0.303	0.767	1	0.047	1	0.741	1	0.156	1	1	1	0.109	1	0.00828	0.00364	0.397	1	1	1	1	1	0.377	0.304	1	1	1
E073_Brain_Dorsolateral_Prefrontal_Cortex_Brain_erc2-chromatin15state-all-files/E073_2_TssAFlnk.bed	1	1	1	1	1	1	1	0.103	1	1	1	0.0364	1	1	0.129	1	0.661	1	1	1	1	1	1	1	1	1	1	1	0.518	1	0.692	1	0.169	1	1	1	0.33	0.896	0.749	1	1	1	1	0.837	1	1	1	1	0.797
E073_Brain_Dorsolateral_Prefrontal_Cortex_Brain_erc2-chromatin15state-all-files/E073_3_TxFlnk.bed	1	1	1	1	1	1	1	1	1	1	1	1	1	1	1	1	1	1	0.461	1	1	1	1	1	1	0.578	1	1	1	1	1	1	1	1	1	0.983	0.628	1	1	0.405	1	1	1	1	1	1	0.607	1	0.447
E073_Brain_Dorsolateral_Prefrontal_Cortex_Brain_erc2-chromatin15state-all-files/E073_4_Tx.bed	1	1	0.65	1	1	1	1	0.201	1	0.764	1	0.16	1	1	0.4	1	1	1	1	1	0.81	1	0.491	1	0.491	1	1	0.121	0.845	1	0.135	1	0.349	1	0.483	0.563	0.0936	0.507	1	1	0.775	1	1	1	0.372	1	1	1	1
E073_Brain_Dorsolateral_Prefrontal_Cortex_Brain_erc2-chromatin15state-all-files/E073_5_TxWk.bed	1	0.896	1	0.246	0.157	1	1	0.000226	1	0.174	0.428	0.299	1	1	0.539	1	0.0171	1	1	1	0.0127	1	0.086	1	1	0.762	0.114	0.458	0.493	1	0.759	1	0.511	1	0.423	1	0.000367	0.933	0.817	1	1	1	1	1	0.0307	1	1	1	1
E073_Brain_Dorsolateral_Prefrontal_Cortex_Brain_erc2-chromatin15state-all-files/E073_6_EnhG.bed	1	1	1	0.667	1	1	0.517	0.264	1	0.675	1	0.843	1	1	1	1	1	1	1	1	1	1	1	1	0.735	0.0142	1	0.812	0.66	1	1	1	0.2	1	1	1	0.468	0.165	1	1	1	1	1	0.712	0.685	1	0.756	1	0.375
E073_Brain_Dorsolateral_Prefrontal_Cortex_Brain_erc2-chromatin15state-all-files/E073_7_Enh.bed	1	1	0.535	1	1	1	1	1.16e-05	1	0.334	1	0.123	1	1	0.437	0.156	0.53	1	1	1	0.0155	1	1	1	0.458	0.097	1	0.598	0.323	1	0.244	1	1	1	1	0.472	0.754	0.58	0.885	1	1	1	0.72	1	0.0331	0.206	0.992	1	1
E073_Brain_Dorsolateral_Prefrontal_Cortex_Brain_erc2-chromatin15state-all-files/E073_8_ZNF-Rpts.bed	1	1	1	1	1	1	1	1	1	0.982	1	1	1	1	1	1	1	1	1	1	0.858	1	1	1	1	1	1	1	1	1	1	1	1	1	1	1	1	0.938	1	1	1	1	1	1	1	1	1	1	1
E073_Brain_Dorsolateral_Prefrontal_Cortex_Brain_erc2-chromatin15state-all-files/E073_9_Het.bed	1	1	1	1	1	1	0.222	1	1	1	1	1	1	1	0.513	1	1	1	1	1	1	1	1	1	0.905	1	1	1	1	0.00812	0.963	1	1	1	1	0.879	1	0.967	0.0651	1	1	1	1	1	1	1	1	1	1
E073_Brain_Dorsolateral_Prefrontal_Cortex_Brain_erc2-chromatin15state-all-files/E073_10_TssBiv.bed	1	0.114	0.657	1	1	1	0.583	1	1	0.0941	1	0.0565	1	1	1	0.488	0.661	1	1	1	0.438	0.392	1	0.526	0.77	0.866	0.244	1	1	1	0.789	1	1	1	1	1	0.981	0.858	1	1	0.228	0.128	1	0.247	1	1	1	1	0.586
E073_Brain_Dorsolateral_Prefrontal_Cortex_Brain_erc2-chromatin15state-all-files/E073_11_BivFlnk.bed	1	0.718	1	0.362	1	1	1	1	0.765	0.247	1	1	1	1	1	1	0.375	1	1	1	0.108	1	0.54	1	1	0.571	1	0.562	0.429	1	1	1	1	1	0.3	1	0.193	1	1	1	1	1	1	0.147	1	1	1	1	0.39
E073_Brain_Dorsolateral_Prefrontal_Cortex_Brain_erc2-chromatin15state-all-files/E073_12_EnhBiv.bed	1	1	1	0.409	1	1	1	1	1	1	1	1	1	1	1	1	1	1	1	1	0.218	1	1	1	0.697	0.172	1	1	1	1	1	1	1	1	1	1	0.279	0.742	1	1	1	1	1	1	1	1	1	1	1
E073_Brain_Dorsolateral_Prefrontal_Cortex_Brain_erc2-chromatin15state-all-files/E073_13_ReprPC.bed	0.922	1	1	0.00792	1	1	0.288	1	1	1	1	0.0362	1	1	0.548	1	0.0383	1	0.0931	1	0.0935	1	0.618	1	0.394	1	1	0.882	1	1	1	1	0.606	1	1	1	0.112	0.21	0.782	0.0645	0.142	1	1	0.826	1	0.158	1	1	0.00565
E073_Brain_Dorsolateral_Prefrontal_Cortex_Brain_erc2-chromatin15state-all-files/E073_14_ReprPCWk.bed	0.0249	1	1	0.924	1	1	0.0753	1	1	1	1	0.646	1	0.00935	0.105	1	1	1	1	0.222	1	1	1	1	1	1	1	1	0.593	1	1	1	1	1	1	0.425	1	0.792	1	1	0.158	1	1	1	0.897	0.086	1	1	0.926
E073_Brain_Dorsolateral_Prefrontal_Cortex_Brain_erc2-chromatin15state-all-files/E073_15_Quies.bed	1	1	1	1	1	1	1	1	1	1	1	1	0.334	1	1	1	1	1	0.801	1	1	1	1	1	1	1	1	1	1	1	1	1	1	1	1	1	1	1	1	0.679	1	1	1	1	1	1	1	1	1
E074_Brain_Substantia_Nigra_Brain_erc2-chromatin15state-all-files/E074_1_TssA.bed	1	0.072	1	0.163	1	1	0.956	0.482	1	0.183	0.939	0.00184	1	1	0.0941	1	0.116	1	1	0.0789	0.00223	1	0.343	1	0.394	1	0.00701	1	1	1	0.136	1	0.462	1	0.269	1	0.0136	0.0054	0.219	1	0.231	1	1	1	0.63	0.315	0.756	1	1
E074_Brain_Substantia_Nigra_Brain_erc2-chromatin15state-all-files/E074_2_TssAFlnk.bed	1	1	0.535	0.791	1	1	1	0.321	1	1	0.857	0.587	1	1	0.2	0.453	0.482	1	1	1	0.71	0.951	1	0.526	1	0.736	1	1	0.318	1	0.348	1	1	1	1	1	0.178	0.135	1	1	1	1	1	1	0.964	1	1	1	0.832
E074_Brain_Substantia_Nigra_Brain_erc2-chromatin15state-all-files/E074_3_TxFlnk.bed	1	1	1	1	1	1	1	1	1	0.614	1	0.0425	1	1	1	1	1	1	1	1	1	1	1	1	1	1	1	1	1	1	1	1	1	1	1	1	0.129	1	1	1	1	1	1	1	1	1	1	1	1
E074_Brain_Substantia_Nigra_Brain_erc2-chromatin15state-all-files/E074_4_Tx.bed	1	1	1	1	1	1	1	0.637	1	0.696	1	0.392	1	1	0.915	1	1	1	1	1	1	1	0.343	1	0.544	1	1	0.57	0.485	1	0.0677	1	0.623	0.94	0.303	1	0.261	0.86	1	1	1	1	1	1	0.625	1	1	1	0.768
E074_Brain_Substantia_Nigra_Brain_erc2-chromatin15state-all-files/E074_5_TxWk.bed	1	1	1	0.781	0.494	1	1	5.3e-05	1	0.0106	0.968	0.515	1	1	0.249	1	0.0822	1	1	1	0.0197	1	0.086	1	1	1	0.361	0.365	0.0546	1	0.198	1	0.182	1	0.269	1	0.00371	0.86	1	1	1	1	1	1	0.0721	1	1	1	1
E074_Brain_Substantia_Nigra_Brain_erc2-chromatin15state-all-files/E074_6_EnhG.bed	1	1	0.968	1	1	1	1	0.205	0.534	1	1	1	1	1	1	0.829	1	1	1	1	0.906	0.824	1	1	0.981	0.175	1	0.677	1	1	1	1	0.849	1	0.935	1	0.857	0.738	1	1	1	1	1	1	0.595	1	0.756	1	1
E074_Brain_Substantia_Nigra_Brain_erc2-chromatin15state-all-files/E074_7_Enh.bed	1	1	1	1	1	1	1	8.21e-06	1	0.808	1	0.00791	1	1	1	0.456	0.295	1	1	1	0.406	1	0.407	1	0.249	0.109	1	0.176	0.891	1	1	1	0.633	1	1	0.988	0.422	1	0.777	1	1	1	1	1	0.00904	1	1	1	0.668
E074_Brain_Substantia_Nigra_Brain_erc2-chromatin15state-all-files/E074_8_ZNF-Rpts.bed	1	1	1	1	1	1	1	1	1	1	1	1	1	1	1	1	1	1	1	1	0.495	1	1	1	0.915	1	1	1	1	1	0.889	1	1	1	1	1	1	0.999	1	1	1	1	1	1	1	1	1	1	1
E074_Brain_Substantia_Nigra_Brain_erc2-chromatin15state-all-files/E074_9_Het.bed	1	1	1	1	1	1	0.0673	1	1	1	1	1	1	1	1	1	1	1	1	1	1	1	1	1	0.717	0.787	1	1	1	0.162	0.994	1	1	1	1	0.976	1	0.792	0.365	1	0.36	1	1	1	1	1	1	0.983	1
E074_Brain_Substantia_Nigra_Brain_erc2-chromatin15state-all-files/E074_10_TssBiv.bed	0.631	1	0.535	1	1	1	1	1	1	0.0752	1	0.0664	1	1	1	0.294	0.113	1	1	1	0.612	0.297	1	1	0.592	0.641	1	1	1	1	1	1	1	1	0.347	1	0.644	1	1	1	1	0.00152	1	1	1	1	1	1	0.465
E074_Brain_Substantia_Nigra_Brain_erc2-chromatin15state-all-files/E074_11_BivFlnk.bed	1	0.629	1	1	1	1	1	1	1	0.571	1	1	1	1	1	1	1	1	1	1	0.42	1	0.453	1	1	1	1	1	1	1	1	1	1	1	1	1	0.1	1	1	1	1	1	1	0.155	1	1	1	1	1
E074_Brain_Substantia_Nigra_Brain_erc2-chromatin15state-all-files/E074_12_EnhBiv.bed	1	1	1	0.404	1	1	0.476	1	1	1	1	1	1	1	1	1	1	1	1	1	0.19	1	1	1	0.648	1	1	1	0.443	1	1	1	1	1	1	1	0.707	0.229	1	1	1	1	1	1	1	1	1	1	0.477
E074_Brain_Substantia_Nigra_Brain_erc2-chromatin15state-all-files/E074_13_ReprPC.bed	1	1	1	0.0162	1	1	0.589	1	1	0.527	1	0.0493	1	1	1	1	0.061	1	0.0736	1	0.0463	1	0.49	0.452	0.55	1	1	0.804	1	1	1	1	0.974	1	1	1	0.0144	0.605	0.869	0.0645	0.033	1	1	0.759	1	0.00675	1	1	0.342
E074_Brain_Substantia_Nigra_Brain_erc2-chromatin15state-all-files/E074_14_ReprPCWk.bed	0.644	1	1	0.981	0.953	0.912	0.294	1	1	1	1	0.129	1	0.14	0.0537	1	1	1	1	0.936	1	1	1	0.55	1	0.301	1	1	0.804	0.829	1	0.948	1	0.108	1	0.689	1	0.373	0.0134	1	1	1	0.783	1	0.414	0.0243	1	1	0.344
E074_Brain_Substantia_Nigra_Brain_erc2-chromatin15state-all-files/E074_15_Quies.bed	1	1	1	1	1	1	1	1	1	1	1	1	0.556	1	1	1	1	1	1	1	1	1	1	1	1	1	0.799	1	1	1	1	1	1	1	1	1	1	1	1	1	1	1	1	1	1	1	1	1	1
E081_Fetal_Brain_Male_Brain_erc2-chromatin15state-all-files/E081_1_TssA.bed	1	0.881	1	0.291	1	1	1	1	1	0.111	1	0.299	1	1	0.328	1	1	1	1	1	0.996	1	0.408	1	1	1	0.996	1	0.86	1	1	1	1	1	0.611	1	0.141	0.0668	0.487	1	0.769	1	1	1	1	1	1	1	1
E081_Fetal_Brain_Male_Brain_erc2-chromatin15state-all-files/E081_2_TssAFlnk.bed	1	0.405	1	1	1	1	1	0.627	1	1	0.676	0.046	1	1	1	1	0.907	1	1	0.333	1	1	1	1	0.354	1	1	1	1	1	0.569	1	1	1	1	1	0.411	0.609	1	1	1	1	1	1	1	0.634	0.765	1	1
E081_Fetal_Brain_Male_Brain_erc2-chromatin15state-all-files/E081_3_TxFlnk.bed	1	1	1	1	1	1	1	1	1	1	1	1	1	1	1	1	1	1	1	1	1	1	1	1	1	1	1	1	1	1	1	1	1	1	1	1	1	1	1	1	1	1	1	1	1	1	1	1	1
E081_Fetal_Brain_Male_Brain_erc2-chromatin15state-all-files/E081_4_Tx.bed	1	1	1	1	1	1	1	1	1	0.984	1	1	1	1	1	1	1	1	1	1	1	1	1	1	1	1	1	0.984	1	1	1	1	0.388	1	0.955	1	0.99	0.946	1	1	1	1	1	1	0.897	1	1	1	1
E081_Fetal_Brain_Male_Brain_erc2-chromatin15state-all-files/E081_5_TxWk.bed	1	1	1	1	1	1	1	0.0153	1	4.77e-05	1	0.00729	1	1	0.32	1	0.178	1	1	1	0.46	1	0.0397	1	1	0.324	0.0694	0.0721	0.493	1	0.863	1	0.685	1	0.965	1	0.00208	0.351	1	1	1	1	1	1	0.0504	0.542	1	1	1
E081_Fetal_Brain_Male_Brain_erc2-chromatin15state-all-files/E081_6_EnhG.bed	1	1	1	1	1	1	1	1	1	0.741	1	1	1	1	1	1	1	1	1	1	1	1	1	1	1	0.635	1	1	1	1	0.622	1	1	1	1	1	0.28	0.731	1	1	1	1	1	1	1	0.67	1	1	1
E081_Fetal_Brain_Male_Brain_erc2-chromatin15state-all-files/E081_7_Enh.bed	0.854	1	1	1	1	1	1	0.594	1	0.0375	1	0.247	1	1	0.0626	1	0.968	1	1	1	0.907	1	0.403	1	1	1	0.179	0.984	1	1	0.123	1	1	0.948	1	1	0.491	0.527	0.626	1	0.169	1	1	1	0.429	1	0.254	1	1
E081_Fetal_Brain_Male_Brain_erc2-chromatin15state-all-files/E081_8_ZNF-Rpts.bed	1	1	1	1	1	1	1	1	1	0.502	1	0.389	1	1	1	1	0.463	1	1	1	0.0513	1	1	1	0.611	1	1	1	1	1	1	1	1	1	1	1	1	1	1	1	1	1	1	1	0.816	1	1	1	1
E081_Fetal_Brain_Male_Brain_erc2-chromatin15state-all-files/E081_9_Het.bed	1	1	1	1	1	1	1	1	1	1	1	1	1	1	0.516	1	1	1	1	1	1	1	1	1	1	1	1	1	1	1	1	1	1	1	1	1	1	0.98	0.0563	1	1	1	1	1	1	1	0.934	1	1
E081_Fetal_Brain_Male_Brain_erc2-chromatin15state-all-files/E081_10_TssBiv.bed	1	1	1	1	1	1	1	1	1	0.735	1	1	1	1	1	1	0.465	1	1	0.472	0.618	1	1	1	0.645	1	1	1	1	1	1	1	1	1	1	1	0.259	0.727	1	1	1	1	1	1	1	1	1	1	1
E081_Fetal_Brain_Male_Brain_erc2-chromatin15state-all-files/E081_11_BivFlnk.bed	1	1	1	1	1	1	1	0.524	1	0.812	1	1	1	1	1	1	0.528	1	1	1	0.224	1	0.209	1	1	0.739	1	1	0.509	1	0.645	1	1	1	0.419	1	0.114	0.234	1	1	1	1	1	1	1	0.67	1	1	1
E081_Fetal_Brain_Male_Brain_erc2-chromatin15state-all-files/E081_12_EnhBiv.bed	1	0.201	1	0.0538	1	1	1	0.169	1	0.579	0.552	0.0479	1	1	1	1	0.0198	1	1	1	0.00684	1	0.343	1	1	0.367	0.576	0.713	0.506	1	1	1	0.37	0.129	0.369	1	0.55	0.101	1	1	0.394	0.0124	1	0.00585	0.253	1	0.411	1	0.562
E081_Fetal_Brain_Male_Brain_erc2-chromatin15state-all-files/E081_13_ReprPC.bed	0.817	1	0.917	0.00792	0.00741	1	0.902	0.0301	1	1	1	0.0101	1	1	1	0.638	0.704	0.449	0.198	0.0789	0.0378	1	1	0.151	0.0087	0.1	1	1	0.361	1	1	1	1	1	1	0.489	0.0338	0.792	1	0.188	1	1	1	1	0.501	0.00419	1	1	0.282
E081_Fetal_Brain_Male_Brain_erc2-chromatin15state-all-files/E081_14_ReprPCWk.bed	0.389	1	1	1	1	1	0.69	1	1	1	0.929	0.544	1	1	0.00849	1	1	0.162	1	0.339	1	0.944	1	1	0.537	0.994	1	1	0.612	0.0668	0.13	0.0408	1	1	0.193	0.644	1	0.951	1	1	0.603	1	1	1	0.786	0.376	1	1	0.0258
E081_Fetal_Brain_Male_Brain_erc2-chromatin15state-all-files/E081_15_Quies.bed	1	1	1	1	1	1	1	1	1	1	1	1	0.106	1	1	1	1	1	1	1	1	1	1	1	1	1	1	1	1	0.996	1	1	1	1	1	1	1	1	1	0.892	1	1	1	1	1	1	1	1	1
E082_Fetal_Brain_Female_Brain_erc2-chromatin15state-all-files/E082_1_TssA.bed	1	0.199	1	0.314	1	1	1	0.482	1	0.0184	0.886	0.00299	1	1	1	1	0.194	1	1	0.719	0.0823	1	0.636	1	1	1	0.0118	1	0.582	1	0.687	1	1	1	0.103	1	0.064	0.182	0.39	1	0.0978	1	1	1	0.955	1	0.709	1	1
E082_Fetal_Brain_Female_Brain_erc2-chromatin15state-all-files/E082_2_TssAFlnk.bed	1	0.398	0.535	1	1	1	1	0.0771	1	0.0478	1	0.0773	1	1	0.02	0.52	0.51	1	1	0.941	0.207	1	0.729	1	0.392	1	1	1	0.953	1	0.622	1	0.728	1	1	1	0.442	0.724	1	1	1	1	1	1	1	0.542	1	1	1
E082_Fetal_Brain_Female_Brain_erc2-chromatin15state-all-files/E082_3_TxFlnk.bed	1	1	1	1	1	1	1	1	1	0.374	1	0.422	1	1	1	1	1	1	0.461	1	1	1	1	1	1	0.73	1	1	1	1	0.00917	1	1	1	1	1	0.819	0.351	1	0.468	1	1	1	1	1	1	1	1	0.472
E082_Fetal_Brain_Female_Brain_erc2-chromatin15state-all-files/E082_4_Tx.bed	1	1	0.942	1	1	1	1	0.143	1	0.37	1	1	1	1	0.0897	1	0.482	1	1	1	1	1	0.086	1	1	0.971	0.35	0.123	0.0866	1	0.375	1	0.531	1	0.248	0.68	0.0259	0.228	1	1	1	1	1	0.693	0.151	1	1	1	1
E082_Fetal_Brain_Female_Brain_erc2-chromatin15state-all-files/E082_5_TxWk.bed	1	0.711	1	0.898	1	1	1	0.00115	1	0.000116	0.994	0.00791	1	1	0.655	1	0.638	1	1	1	0.205	1	0.000882	1	1	0.93	0.35	1	0.604	1	1	1	0.99	1	1	1	0.00189	1	1	1	1	1	1	1	0.0404	0.75	1	1	0.587
E082_Fetal_Brain_Female_Brain_erc2-chromatin15state-all-files/E082_6_EnhG.bed	1	1	1	1	1	1	0.902	1	1	0.19	1	0.526	1	1	1	1	1	1	1	1	1	1	1	1	1	0.361	1	1	0.874	1	1	1	1	1	1	1	0.67	0.876	0.529	1	1	1	1	1	1	1	1	1	1
E082_Fetal_Brain_Female_Brain_erc2-chromatin15state-all-files/E082_7_Enh.bed	1	1	1	1	1	1	1	0.217	1	0.235	1	0.872	1	1	0.422	1	0.51	1	1	1	0.948	1	0.863	1	1	1	1	0.984	1	1	0.871	1	1	1	1	1	1	0.846	1	1	0.258	1	1	1	0.335	1	0.78	1	1
E082_Fetal_Brain_Female_Brain_erc2-chromatin15state-all-files/E082_8_ZNF-Rpts.bed	1	1	1	1	1	1	1	1	1	0.832	1	1	1	1	1	1	1	1	0.799	1	0.388	1	1	1	0.537	1	1	1	1	1	0.256	1	1	1	0.393	1	1	1	1	1	1	1	1	1	1	1	1	1	1
E082_Fetal_Brain_Female_Brain_erc2-chromatin15state-all-files/E082_9_Het.bed	1	1	1	1	1	1	0.227	1	1	1	1	1	1	1	1	1	1	1	1	1	1	1	1	1	1	1	1	1	1	0.358	0.208	1	1	1	0.998	1	1	0.932	0.222	1	1	1	1	1	1	1	1	1	1
E082_Fetal_Brain_Female_Brain_erc2-chromatin15state-all-files/E082_10_TssBiv.bed	1	0.248	1	0.207	1	1	1	1	1	1	1	0.00474	1	1	1	1	0.428	1	1	1	0.0211	1	0.295	1	1	0.299	0.266	1	0.804	1	0.25	1	1	1	1	1	0.296	0.718	1	1	1	0.163	1	0.0281	1	1	0.891	1	1
E082_Fetal_Brain_Female_Brain_erc2-chromatin15state-all-files/E082_11_BivFlnk.bed	1	1	1	1	1	1	1	0.708	1	0.629	1	1	1	1	1	1	0.205	1	1	1	0.158	1	0.826	0.526	0.819	0.895	0.678	0.888	1	1	1	1	0.895	1	0.483	1	0.0312	0.15	1	1	1	0.128	1	0.288	0.593	1	1	1	1
E082_Fetal_Brain_Female_Brain_erc2-chromatin15state-all-files/E082_12_EnhBiv.bed	1	1	1	0.13	1	1	1	1	1	0.977	0.939	1	1	1	1	1	0.65	1	1	1	0.112	1	0.823	0.64	0.813	0.813	1	0.677	1	1	1	1	1	1	1	1	0.939	0.057	1	1	1	1	1	1	1	0.763	1	1	0.161
E082_Fetal_Brain_Female_Brain_erc2-chromatin15state-all-files/E082_13_ReprPC.bed	0.379	1	1	0.00819	0.00535	1	0.562	0.768	1	0.475	1	0.0345	1	1	1	0.919	0.727	0.258	0.352	0.084	0.0405	1	1	0.437	0.319	0.46	1	1	0.13	1	1	1	1	1	1	0.924	0.00416	0.91	0.197	0.306	0.165	1	1	1	0.31	0.00675	0.912	1	0.227
E082_Fetal_Brain_Female_Brain_erc2-chromatin15state-all-files/E082_14_ReprPCWk.bed	0.423	1	1	1	1	0.774	1	1	1	1	1	0.724	1	1	0.00217	1	1	0.0894	1	1	0.907	0.824	1	0.57	0.747	0.322	1	1	0.803	1	0.0357	0.0189	1	1	0.832	1	1	1	0.272	1	1	1	1	1	0.641	0.542	1	1	0.167
E082_Fetal_Brain_Female_Brain_erc2-chromatin15state-all-files/E082_15_Quies.bed	1	1	1	1	1	1	1	1	1	1	1	1	1	1	1	1	1	1	1	1	1	1	1	1	1	1	1	1	1	0.479	1	1	1	1	1	1	1	1	1	1	1	1	1	1	1	1	1	1	1
E125_NH-A_Astrocytes_Primary_Cells_Brain_erc2-chromatin15state-all-files/E125_1_TssA.bed	1	0.286	1	0.063	1	1	1	0.0453	1	0.549	0.637	0.0787	1	1	0.106	1	0.0338	1	1	0.945	0.000481	1	0.822	1	0.741	0.866	0.176	1	1	1	0.234	1	1	1	0.685	1	0.0989	0.00464	0.506	1	0.172	1	1	1	0.419	0.841	1	1	0.895
E125_NH-A_Astrocytes_Primary_Cells_Brain_erc2-chromatin15state-all-files/E125_2_TssAFlnk.bed	1	1	0.657	1	1	1	1	0.743	1	1	1	0.296	1	1	0.993	0.634	0.852	1	1	0.0897	0.359	1	1	1	0.114	1	1	0.627	0.39	1	0.435	1	0.726	1	0.563	1	0.157	0.855	1	1	1	1	1	0.277	0.621	1	0.549	1	0.801
E125_NH-A_Astrocytes_Primary_Cells_Brain_erc2-chromatin15state-all-files/E125_3_TxFlnk.bed	1	1	1	1	1	1	1	0.633	1	0.882	1	0.169	1	1	1	1	0.609	1	0.461	0.659	1	1	0.715	1	1	0.00644	1	1	1	1	1	1	1	1	1	0.889	0.00994	1	0.517	0.516	1	1	1	1	0.181	1	1	1	1
E125_NH-A_Astrocytes_Primary_Cells_Brain_erc2-chromatin15state-all-files/E125_4_Tx.bed	1	1	1	1	1	1	1	0.441	1	1	1	1	1	1	1	1	1	1	1	1	1	1	0.477	1	1	0.993	1	0.252	1	1	1	1	0.473	1	0.349	1	0.00832	1	1	1	1	1	1	1	0.655	1	1	1	0.953
E125_NH-A_Astrocytes_Primary_Cells_Brain_erc2-chromatin15state-all-files/E125_5_TxWk.bed	0.967	1	1	0.145	1	1	1	0.000902	1	0.00065	0.91	0.00184	1	1	0.233	1	0.205	1	1	1	0.000519	1	0.629	0.92	0.996	0.097	1	0.781	0.0731	1	0.0208	1	1	1	1	1	1.9e-05	0.497	1	1	1	1	1	1	0.153	0.708	1	1	0.847
E125_NH-A_Astrocytes_Primary_Cells_Brain_erc2-chromatin15state-all-files/E125_6_EnhG.bed	1	1	0.992	1	1	1	1	0.911	1	1	1	0.531	1	1	1	0.983	0.851	1	1	1	1	0.826	0.636	1	1	0.172	1	1	1	1	1	1	1	1	1	1	0.264	1	1	1	1	1	1	1	0.667	1	1	1	0.625
E125_NH-A_Astrocytes_Primary_Cells_Brain_erc2-chromatin15state-all-files/E125_7_Enh.bed	1	1	1	0.583	1	1	1	0.00955	1	1	0.915	0.00568	1	1	1	1	0.463	1	0.461	1	0.00129	1	1	1	0.028	0.809	1	1	0.443	1	0.871	1	1	1	1	1	4.4e-05	1	0.59	0.437	1	1	1	1	0.0251	0.0243	0.843	1	0.134
E125_NH-A_Astrocytes_Primary_Cells_Brain_erc2-chromatin15state-all-files/E125_8_ZNF-Rpts.bed	1	1	1	1	1	1	1	0.721	1	1	1	1	1	1	1	1	1	1	1	1	0.135	1	1	1	0.848	0.807	1	1	1	1	1	1	1	1	1	1	1	0.942	1	1	1	1	1	1	1	1	1	1	1
E125_NH-A_Astrocytes_Primary_Cells_Brain_erc2-chromatin15state-all-files/E125_9_Het.bed	1	1	1	1	1	1	0.956	1	1	1	1	1	1	1	1	1	1	1	1	1	1	1	1	1	1	1	1	1	1	0.115	1	1	1	1	1	1	1	0.422	1	1	1	1	1	1	1	1	1	0.578	1
E125_NH-A_Astrocytes_Primary_Cells_Brain_erc2-chromatin15state-all-files/E125_10_TssBiv.bed	1	1	1	0.314	1	1	1	1	1	0.323	1	0.089	1	1	1	1	0.473	1	0.461	1	0.00591	1	1	1	1	1	0.966	1	1	1	1	1	1	1	1	1	1	0.223	1	0.437	1	0.113	1	1	1	1	1	1	0.474
E125_NH-A_Astrocytes_Primary_Cells_Brain_erc2-chromatin15state-all-files/E125_11_BivFlnk.bed	0.734	0.718	1	1	1	1	1	1	1	0.0954	1	0.0216	1	1	1	1	0.485	1	1	1	1	1	0.0772	1	1	0.698	1	0.638	1	1	0.16	1	1	1	0.103	1	0.0165	0.666	1	1	1	1	1	1	0.452	1	0.709	1	0.486
E125_NH-A_Astrocytes_Primary_Cells_Brain_erc2-chromatin15state-all-files/E125_12_EnhBiv.bed	1	1	1	0.476	1	1	1	1	1	0.564	1	0.0108	1	0.844	1	1	1	1	1	1	0.388	1	1	1	1	0.817	1	0.69	1	0.317	0.271	1	1	1	1	1	0.0437	0.183	1	1	1	1	1	1	0.58	0.226	1	1	1
E125_NH-A_Astrocytes_Primary_Cells_Brain_erc2-chromatin15state-all-files/E125_13_ReprPC.bed	0.638	0.219	1	0.0315	1	1	0.303	1	1	0.811	1	0.0557	1	0.42	1	1	0.367	1	0.631	0.0314	0.572	1	0.626	0.389	1	0.441	0.988	1	1	1	0.435	1	1	0.129	1	0.333	1	0.752	1	0.596	0.346	1	0.72	1	0.625	0.0298	1	1	0.543
E125_NH-A_Astrocytes_Primary_Cells_Brain_erc2-chromatin15state-all-files/E125_14_ReprPCWk.bed	0.435	1	1	1	0.157	0.728	0.303	0.809	1	1	0.34	0.993	1	0.844	0.0143	0.156	0.463	0.164	1	0.598	1	0.243	1	1	0.156	1	1	1	0.467	1	1	1	1	0.665	0.468	0.197	1	0.0803	1	1	0.394	1	1	0.622	1	1	1	1	0.511
E125_NH-A_Astrocytes_Primary_Cells_Brain_erc2-chromatin15state-all-files/E125_15_Quies.bed	1	0.189	1	1	1	1	1	1	1	0.694	1	1	0.0637	1	1	1	1	1	1	1	1	1	1	1	1	1	0.0858	1	1	0.169	1	0.905	1	1	1	1	1	1	1	1	1	1	1	1	1	1	1	1	1
E119_HMEC_Mammary_Epithelial_Primary_Cells_Breast_erc2-chromatin15state-all-files/E119_1_TssA.bed	1	0.248	1	0.162	1	1	0.874	0.0552	1	0.151	1	0.0432	1	1	0.146	1	0.169	1	1	0.93	0.00511	1	0.561	1	0.298	1	0.267	1	0.689	1	0.121	1	1	1	0.107	1	0.24	0.0205	0.306	1	0.231	1	1	1	0.677	0.598	1	1	1
E119_HMEC_Mammary_Epithelial_Primary_Cells_Breast_erc2-chromatin15state-all-files/E119_2_TssAFlnk.bed	0.841	1	0.618	0.596	1	1	1	0.203	1	0.588	1	0.0315	1	1	1	0.57	0.296	1	1	0.347	0.358	1	0.75	1	0.774	0.783	1	0.176	0.318	1	0.122	1	0.639	1	1	1	0.0476	0.0325	1	1	1	0.131	1	0.229	0.178	0.738	0.709	1	1
E119_HMEC_Mammary_Epithelial_Primary_Cells_Breast_erc2-chromatin15state-all-files/E119_3_TxFlnk.bed	1	0.886	1	1	1	1	1	0.659	1	0.482	0.953	0.197	1	1	1	1	1	1	1	1	0.869	1	0.797	1	0.381	1	1	1	1	1	1	1	0.781	1	1	1	0.0589	1	0.506	1	1	1	1	1	1	1	1	1	0.149
E119_HMEC_Mammary_Epithelial_Primary_Cells_Breast_erc2-chromatin15state-all-files/E119_4_Tx.bed	1	1	1	1	1	1	1	0.0382	1	1	1	0.553	1	1	1	1	1	1	1	1	1	1	0.249	1	0.981	0.797	1	0.395	0.493	1	0.82	1	0.547	1	0.322	1	0.235	0.917	1	1	0.711	1	1	1	0.135	1	1	1	1
E119_HMEC_Mammary_Epithelial_Primary_Cells_Breast_erc2-chromatin15state-all-files/E119_5_TxWk.bed	1	0.993	1	0.283	1	1	1	0.00147	1	0.035	0.838	0.0902	1	1	0.195	1	0.0428	1	1	1	0.00246	1	0.513	1	1	0.106	0.124	0.0363	0.285	1	0.361	1	0.0759	1	0.203	1	5.06e-07	0.841	1	1	1	1	1	1	0.222	0.0101	1	1	0.984
E119_HMEC_Mammary_Epithelial_Primary_Cells_Breast_erc2-chromatin15state-all-files/E119_6_EnhG.bed	1	1	1	1	1	1	1	0.192	1	1	1	0.464	1	1	0.74	1	1	1	1	1	0.71	0.841	0.861	1	1	0.174	1	1	0.465	1	0.406	1	1	1	1	1	1	1	1	1	1	1	1	1	0.111	1	1	1	1
E119_HMEC_Mammary_Epithelial_Primary_Cells_Breast_erc2-chromatin15state-all-files/E119_7_Enh.bed	0.706	1	1	0.312	0.88	1	1	0.00086	1	1	0.298	0.000577	1	1	0.655	0.987	0.636	1	1	1	0.0476	1	1	1	0.0349	0.227	1	1	0.938	1	0.161	1	1	1	1	1	0.0606	0.499	0.794	1	1	1	1	1	0.114	0.597	1	1	0.416
E119_HMEC_Mammary_Epithelial_Primary_Cells_Breast_erc2-chromatin15state-all-files/E119_8_ZNF-Rpts.bed	1	1	1	1	1	1	1	0.694	1	1	1	1	1	1	1	0.576	1	1	1	1	0.87	1	1	1	0.866	1	1	1	1	1	0.357	1	1	1	1	1	1	1	1	1	1	1	1	1	0.609	1	1	1	1
E119_HMEC_Mammary_Epithelial_Primary_Cells_Breast_erc2-chromatin15state-all-files/E119_9_Het.bed	1	1	1	1	1	1	1	1	1	1	1	1	1	0.844	1	1	1	1	1	1	1	1	1	1	1	1	1	1	1	1	1	1	1	1	1	0.145	1	0.565	0.504	1	0.808	1	1	1	1	1	1	1	1
E119_HMEC_Mammary_Epithelial_Primary_Cells_Breast_erc2-chromatin15state-all-files/E119_10_TssBiv.bed	1	1	1	0.0953	1	1	1	1	1	1	1	1	1	1	1	1	1	1	1	1	0.224	1	1	1	1	1	1	1	1	1	1	1	1	1	1	1	1	0.354	1	1	1	1	1	1	1	1	1	1	1
E119_HMEC_Mammary_Epithelial_Primary_Cells_Breast_erc2-chromatin15state-all-files/E119_11_BivFlnk.bed	1	1	1	1	1	1	1	0.446	1	1	1	0.0644	1	1	1	1	0.077	1	1	1	0.000491	1	0.562	1	1	0.634	0.958	0.61	1	1	1	1	1	1	0.322	1	0.0491	1	1	1	1	1	1	1	0.386	1	1	1	0.472
E119_HMEC_Mammary_Epithelial_Primary_Cells_Breast_erc2-chromatin15state-all-files/E119_12_EnhBiv.bed	1	1	1	0.404	1	1	1	1	1	0.035	1	1	1	1	1	1	1	1	1	1	0.0604	1	0.685	1	1	1	1	0.677	1	1	0.645	1	1	1	1	1	0.299	0.301	1	1	0.134	1	1	1	1	1	1	1	0.506
E119_HMEC_Mammary_Epithelial_Primary_Cells_Breast_erc2-chromatin15state-all-files/E119_13_ReprPC.bed	1	1	1	0.201	1	1	0.811	1	1	0.596	1	0.221	1	1	1	1	0.114	1	0.5	1	0.608	1	0.27	0.0623	0.683	0.906	0.53	1	1	1	1	1	1	1	1	0.997	0.649	0.719	1	0.493	0.239	1	1	1	1	0.747	1	1	0.472
E119_HMEC_Mammary_Epithelial_Primary_Cells_Breast_erc2-chromatin15state-all-files/E119_14_ReprPCWk.bed	1	1	1	0.734	1	1	0.708	1	1	0.745	1	1	1	1	1	0.345	1	1	1	0.112	0.845	1	1	1	1	1	1	1	1	1	0.631	1	1	0.0428	1	0.538	1	1	1	1	0.868	1	1	1	1	0.857	1	1	0.937
E119_HMEC_Mammary_Epithelial_Primary_Cells_Breast_erc2-chromatin15state-all-files/E119_15_Quies.bed	0.977	0.211	1	1	1	1	1	1	1	1	1	1	1	1	1	1	1	1	1	1	1	1	1	1	1	1	0.65	1	1	0.181	1	1	1	1	1	1	1	1	1	1	1	1	1	1	1	1	1	0.983	1
E117_HeLa-S3_Cervical_Carcinoma_Cervix_erc2-chromatin15state-all-files/E117_1_TssA.bed	1	0.845	1	0.396	1	1	0.759	0.126	1	0.0706	0.348	0.102	1	0.15	0.073	1	0.181	1	1	0.503	0.000318	1	0.409	1	0.748	1	0.0239	1	0.705	1	0.0848	1	0.932	1	0.183	1	0.00717	0.0735	0.487	1	0.154	1	1	0.927	0.729	1	0.895	1	0.161
E117_HeLa-S3_Cervical_Carcinoma_Cervix_erc2-chromatin15state-all-files/E117_2_TssAFlnk.bed	1	1	1	0.232	1	1	1	0.0138	1	0.897	0.939	0.00439	1	1	1	1	0.505	1	1	0.683	0.19	1	1	1	0.374	0.626	1	0.35	0.575	1	0.137	1	1	1	1	1	0.0296	0.549	1	1	1	1	1	1	0.897	0.0569	1	1	0.305
E117_HeLa-S3_Cervical_Carcinoma_Cervix_erc2-chromatin15state-all-files/E117_3_TxFlnk.bed	1	1	0.166	1	1	1	0.872	0.0925	1	0.714	1	0.12	1	1	1	0.156	0.84	1	0.635	1	1	0.056	0.98	1	0.979	0.511	1	0.999	0.827	1	0.963	1	0.327	1	0.637	1	0.211	1	0.506	0.744	1	1	1	1	0.286	1	1	1	0.761
E117_HeLa-S3_Cervical_Carcinoma_Cervix_erc2-chromatin15state-all-files/E117_4_Tx.bed	1	1	1	1	0.706	1	1	0.284	1	1	1	0.739	1	1	0.775	1	1	1	1	0.899	1	1	0.125	1	1	0.919	1	0.35	1	1	0.661	1	0.229	1	0.106	1	0.236	0.665	1	1	0.954	1	1	1	0.15	1	0.857	1	0.591
E117_HeLa-S3_Cervical_Carcinoma_Cervix_erc2-chromatin15state-all-files/E117_5_TxWk.bed	1	0.913	1	0.0935	1	1	1	2.87e-05	1	0.0196	0.415	0.0292	1	1	0.126	0.378	0.259	1	1	0.492	0.000285	1	0.54	0.723	1	0.175	1	0.162	0.0674	1	0.00257	1	0.351	1	0.741	1	4.9e-06	0.917	0.506	1	1	1	1	1	0.461	0.46	1	1	0.936
E117_HeLa-S3_Cervical_Carcinoma_Cervix_erc2-chromatin15state-all-files/E117_6_EnhG.bed	1	1	1	1	1	1	1	1	1	1	1	0.233	1	1	1	1	0.17	0.789	1	1	0.863	1	0.937	1	0.645	0.127	1	1	0.601	1	0.947	1	1	1	1	1	1	0.718	1	1	1	1	1	1	0.603	1	1	1	1
E117_HeLa-S3_Cervical_Carcinoma_Cervix_erc2-chromatin15state-all-files/E117_7_Enh.bed	1	1	1	0.00651	1	1	1	0.00309	1	1	1	0.1	1	1	0.813	1	0.457	1	0.918	1	0.411	1	1	1	0.0371	0.38	1	1	0.469	1	1	1	0.169	1	0.739	1	0.0575	0.836	1	0.893	1	1	1	1	0.411	0.836	0.91	1	0.587
E117_HeLa-S3_Cervical_Carcinoma_Cervix_erc2-chromatin15state-all-files/E117_8_ZNF-Rpts.bed	1	1	1	1	1	1	1	1	1	1	1	1	1	1	1	1	1	1	1	1	0.606	1	1	1	1	1	0.996	1	1	1	1	1	1	1	1	1	1	1	1	1	1	1	1	1	1	1	1	1	1
E117_HeLa-S3_Cervical_Carcinoma_Cervix_erc2-chromatin15state-all-files/E117_9_Het.bed	1	1	1	1	1	1	1	1	1	1	1	1	1	1	1	1	1	1	1	1	0.533	1	1	1	1	1	1	1	0.931	1	1	1	1	1	1	1	1	1	0.225	1	0.804	1	1	1	1	0.96	1	1	1
E117_HeLa-S3_Cervical_Carcinoma_Cervix_erc2-chromatin15state-all-files/E117_10_TssBiv.bed	1	1	1	1	1	1	1	1	1	1	1	1	1	1	1	1	1	1	1	1	1	1	1	1	1	1	1	1	1	1	1	1	1	1	1	1	1	1	1	1	1	1	1	1	1	1	1	1	1
E117_HeLa-S3_Cervical_Carcinoma_Cervix_erc2-chromatin15state-all-files/E117_11_BivFlnk.bed	1	1	1	1	1	1	1	1	1	0.225	1	0.105	1	1	1	1	1	1	1	1	1	1	0.261	1	1	1	1	1	1	1	1	1	1	1	1	1	1	1	1	1	1	1	1	1	1	0.215	1	1	1
E117_HeLa-S3_Cervical_Carcinoma_Cervix_erc2-chromatin15state-all-files/E117_12_EnhBiv.bed	1	1	1	1	1	1	1	1	1	1	1	1	1	1	1	1	1	1	1	1	0.298	1	1	1	1	1	1	1	1	1	1	1	1	1	1	1	1	0.499	1	1	1	1	1	1	1	1	1	1	1
E117_HeLa-S3_Cervical_Carcinoma_Cervix_erc2-chromatin15state-all-files/E117_13_ReprPC.bed	1	1	1	1	1	1	1	1	1	1	1	1	1	1	1	1	1	1	1	0.929	1	1	1	1	1	1	1	1	1	1	0.863	1	1	0.301	1	1	1	0.91	1	1	0.35	1	1	1	1	1	1	1	1
E117_HeLa-S3_Cervical_Carcinoma_Cervix_erc2-chromatin15state-all-files/E117_14_ReprPCWk.bed	0.73	1	1	1	1	1	1	1	1	1	1	1	1	1	0.0423	1	1	1	1	0.925	1	1	1	1	1	1	1	1	1	1	1	1	1	0.555	1	1	1	0.968	0.387	1	0.0807	0.628	0.774	1	1	0.917	1	1	1
E117_HeLa-S3_Cervical_Carcinoma_Cervix_erc2-chromatin15state-all-files/E117_15_Quies.bed	1	0.105	1	1	1	1	1	1	1	0.239	1	1	1	1	1	1	1	1	0.743	1	1	1	1	1	1	1	0.14	1	1	0.00097	1	0.947	1	1	1	1	1	1	1	0.628	1	1	1	1	1	1	1	0.942	1
E075_Colonic_Mucosa_Digestive_erc2-chromatin15state-all-files/E075_1_TssA.bed	0.626	0.306	1	0.334	1	1	0.992	0.0117	1	0.318	0.0208	0.011	1	1	0.341	1	0.207	1	1	0.203	0.0253	1	0.61	1	0.418	0.295	0.341	1	0.891	1	0.241	1	1	1	0.508	1	0.0913	0.0178	0.222	1	0.232	1	1	1	0.414	0.537	1	1	0.768
E075_Colonic_Mucosa_Digestive_erc2-chromatin15state-all-files/E075_2_TssAFlnk.bed	1	1	1	0.116	1	1	1	0.0113	1	1	0.829	0.123	1	1	0.406	0.908	0.358	1	1	1	0.0482	1	1	1	0.354	0.93	1	1	0.0111	1	0.0431	1	1	1	0.231	0.915	0.00423	0.228	0.517	1	1	1	1	1	0.107	1	0.281	1	1
E075_Colonic_Mucosa_Digestive_erc2-chromatin15state-all-files/E075_3_TxFlnk.bed	1	1	0.535	1	1	1	1	1	1	1	1	0.056	1	1	1	0.355	1	1	0.406	1	0.612	0.275	0.576	1	0.58	0.151	1	1	0.465	1	0.134	1	1	1	1	1	0.214	0.645	1	0.41	1	1	1	1	1	1	1	1	0.447
E075_Colonic_Mucosa_Digestive_erc2-chromatin15state-all-files/E075_4_Tx.bed	1	1	1	1	0.581	1	1	0.602	1	1	1	0.366	1	1	0.4	1	1	1	1	0.993	0.374	1	0.327	1	0.838	1	1	0.431	0.0843	1	0.235	1	0.445	1	0.0877	1	0.064	0.0922	0.731	1	0.724	1	1	1	0.155	0.977	0.819	1	0.76
E075_Colonic_Mucosa_Digestive_erc2-chromatin15state-all-files/E075_5_TxWk.bed	1	1	1	0.205	1	1	1	5.88e-08	1	0.0811	0.954	0.361	1	1	0.0667	1	0.228	1	1	0.874	0.205	1	0.403	1	0.000457	0.46	1	0.121	0.681	1	0.129	1	0.143	1	1	1	0.000255	0.738	1	1	1	1	1	1	0.175	1	1	1	0.88
E075_Colonic_Mucosa_Digestive_erc2-chromatin15state-all-files/E075_6_EnhG.bed	1	0.801	0.724	1	1	1	1	0.00896	1	1	1	0.472	1	1	1	0.57	1	1	1	1	1	0.473	1	1	1	0.409	1	1	0.874	1	0.0579	1	1	1	1	1	0.101	0.799	0.342	1	1	1	1	1	0.86	1	1	1	0.905
E075_Colonic_Mucosa_Digestive_erc2-chromatin15state-all-files/E075_7_Enh.bed	1	1	1	1	1	1	1	0.0132	1	1	1	0.0664	1	1	0.993	0.287	0.693	1	1	0.472	0.0204	1	0.493	1	0.0562	0.234	1	0.537	0.0588	1	0.691	1	0.00241	1	1	1	0.858	0.54	0.0617	1	1	1	1	0.383	0.366	0.827	1	1	0.0224
E075_Colonic_Mucosa_Digestive_erc2-chromatin15state-all-files/E075_8_ZNF-Rpts.bed	1	1	1	1	1	1	1	1	1	1	1	1	1	1	1	1	1	1	1	1	0.123	1	1	1	1	1	1	1	1	1	1	1	1	1	1	1	1	0.933	1	1	1	1	1	1	1	1	1	1	1
E075_Colonic_Mucosa_Digestive_erc2-chromatin15state-all-files/E075_9_Het.bed	1	1	1	1	1	1	1	1	1	1	1	0.51	1	1	0.845	1	1	1	1	1	1	1	1	1	1	1	1	1	1	1	1	1	1	1	1	1	1	1	0.0805	1	1	1	1	1	1	0.822	1	1	1
E075_Colonic_Mucosa_Digestive_erc2-chromatin15state-all-files/E075_10_TssBiv.bed	1	1	1	0.449	1	1	1	1	1	0.929	0.867	0.00694	1	1	1	1	0.189	1	1	1	0.00105	1	1	0.526	0.757	0.809	0.045	1	1	1	0.718	1	1	1	0.127	1	1.35e-05	0.327	1	1	1	0.0704	1	0.256	1	1	1	1	0.14
E075_Colonic_Mucosa_Digestive_erc2-chromatin15state-all-files/E075_11_BivFlnk.bed	1	0.943	1	0.444	1	1	1	1	1	0.0874	1	0.167	1	1	1	1	0.583	1	1	1	0.137	1	0.353	1	0.722	0.357	1	0.864	1	1	1	1	0.893	1	0.361	1	0.451	0.778	1	1	1	0.104	1	0.155	1	1	1	1	1
E075_Colonic_Mucosa_Digestive_erc2-chromatin15state-all-files/E075_12_EnhBiv.bed	0.854	0.357	1	0.5	1	1	1	0.617	1	0.19	1	0.16	1	1	1	1	0.166	1	0.493	1	0.298	1	0.326	1	1	0.301	0.221	1	1	1	1	1	1	1	1	1	0.454	0.792	1	0.437	0.105	1	1	1	1	1	1	1	0.149
E075_Colonic_Mucosa_Digestive_erc2-chromatin15state-all-files/E075_13_ReprPC.bed	1	0.621	1	0.00651	1	1	0.185	1	1	0.194	1	0.45	1	1	0.472	1	0.0268	1	0.232	1	0.152	1	1	0.523	1	1	0.592	1	1	1	1	1	1	1	1	0.829	0.329	0.146	1	0.188	0.0224	1	1	0.858	0.797	0.000259	0.78	1	0.413
E075_Colonic_Mucosa_Digestive_erc2-chromatin15state-all-files/E075_14_ReprPCWk.bed	1	1	1	1	1	0.0457	0.657	1	1	1	1	0.046	1	0.15	0.192	1	1	1	1	0.617	1	1	1	0.85	1	0.919	1	1	0.723	1	1	1	1	0.147	0.826	0.444	1	0.496	0.0544	1	1	1	1	1	0.48	0.0607	1	1	0.203
E075_Colonic_Mucosa_Digestive_erc2-chromatin15state-all-files/E075_15_Quies.bed	1	1	1	1	1	1	1	1	1	1	1	1	0.241	1	1	1	1	1	1	1	1	1	1	1	1	1	1	1	1	0.304	1	1	1	1	1	1	1	1	1	0.868	1	1	1	1	1	1	1	0.983	1
E077_Duodenum_Mucosa_Digestive_erc2-chromatin15state-all-files/E077_1_TssA.bed	0.123	1	1	0.314	1	1	0.303	0.00458	1	0.455	0.133	0.00299	1	1	0.513	1	0.366	1	1	0.00523	0.0138	1	0.855	1	0.374	0.162	0.0858	0.312	0.598	1	0.0663	1	1	1	0.0453	1	0.0517	0.0037	0.16	1	0.27	1	1	1	0.107	1	1	1	1
E077_Duodenum_Mucosa_Digestive_erc2-chromatin15state-all-files/E077_2_TssAFlnk.bed	1	1	0.69	0.0272	1	1	1	0.00244	1	0.683	1	0.0326	1	1	0.96	0.649	0.728	1	1	0.308	0.0797	1	1	1	0.343	0.441	1	0.827	0.0752	1	0.0547	1	1	1	0.361	1	0.373	0.119	0.299	1	1	1	1	1	0.342	1	0.607	1	0.625
E077_Duodenum_Mucosa_Digestive_erc2-chromatin15state-all-files/E077_3_TxFlnk.bed	1	1	0.65	1	1	1	1	1	1	1	1	0.559	1	1	1	0.547	1	1	0.511	1	1	0.504	1	1	0.836	0.313	1	1	1	1	0.325	1	1	1	1	0.677	0.215	1	1	0.52	1	1	1	1	0.638	1	1	1	0.587
E077_Duodenum_Mucosa_Digestive_erc2-chromatin15state-all-files/E077_4_Tx.bed	1	1	1	1	1	1	1	0.144	1	1	1	0.553	1	1	0.993	1	1	1	1	1	0.71	1	0.22	1	0.466	0.895	0.988	0.582	0.521	1	0.266	1	0.147	1	0.193	1	0.0606	0.54	1	1	1	1	1	1	0.806	1	0.78	1	1
E077_Duodenum_Mucosa_Digestive_erc2-chromatin15state-all-files/E077_5_TxWk.bed	0.725	1	1	0.481	1	1	1	8.72e-07	1	0.0118	0.429	0.221	1	1	0.363	1	0.285	1	0.5	0.492	0.0163	1	0.51	1	0.266	0.115	0.996	0.0121	0.712	1	0.209	1	0.334	1	0.468	1	0.000754	0.79	1	0.958	1	1	1	1	0.00491	0.958	1	1	0.884
E077_Duodenum_Mucosa_Digestive_erc2-chromatin15state-all-files/E077_6_EnhG.bed	0.874	1	1	1	1	1	0.302	0.007	1	0.837	1	0.448	1	1	1	1	0.661	0.923	1	1	1	1	1	1	0.396	0.211	1	1	0.467	1	0.689	1	0.585	1	1	1	0.37	1	1	1	0.73	1	1	1	0.836	1	1	1	0.23
E077_Duodenum_Mucosa_Digestive_erc2-chromatin15state-all-files/E077_7_Enh.bed	1	1	0.618	0.0192	1	1	1	0.00221	0.637	0.899	0.561	0.269	1	1	0.093	0.509	0.41	1	1	1	0.252	1	0.935	1	0.000677	0.0381	1	0.206	0.461	1	0.106	1	0.332	1	0.963	0.622	0.0531	1	0.994	1	1	1	1	1	0.0445	0.981	1	1	0.603
E077_Duodenum_Mucosa_Digestive_erc2-chromatin15state-all-files/E077_8_ZNF-Rpts.bed	1	1	1	0.898	1	1	1	1	1	1	1	1	1	1	1	1	1	1	1	1	0.848	1	1	1	1	1	0.69	1	1	1	1	1	1	0.711	0.79	1	1	0.954	1	1	1	1	1	1	1	1	1	1	1
E077_Duodenum_Mucosa_Digestive_erc2-chromatin15state-all-files/E077_9_Het.bed	1	1	1	1	1	1	1	1	1	1	1	0.845	1	1	1	1	1	1	1	1	1	1	1	1	1	1	1	1	0.878	1	1	1	1	1	1	1	1	0.877	0.0719	1	1	1	1	1	1	1	1	1	1
E077_Duodenum_Mucosa_Digestive_erc2-chromatin15state-all-files/E077_10_TssBiv.bed	1	1	1	1	1	1	1	1	1	0.247	1	0.182	1	1	1	1	0.203	1	0.507	1	0.392	1	1	0.526	0.354	1	1	1	1	1	0.782	1	1	1	1	1	0.508	0.141	1	0.534	1	1	1	1	1	1	1	1	0.587
E077_Duodenum_Mucosa_Digestive_erc2-chromatin15state-all-files/E077_11_BivFlnk.bed	0.282	0.36	1	0.476	1	1	1	0.657	1	0.977	1	1	1	1	1	1	0.617	1	1	1	0.0357	1	0.806	1	1	0.866	1	1	1	1	1	1	0.269	1	1	1	0.199	0.403	1	1	1	0.113	1	0.00987	0.154	1	1	1	1
E077_Duodenum_Mucosa_Digestive_erc2-chromatin15state-all-files/E077_12_EnhBiv.bed	1	0.526	1	0.653	1	1	0.672	1	1	0.735	1	0.277	1	1	1	1	1	1	1	1	0.568	1	0.963	0.672	1	0.954	0.133	1	0.251	1	1	1	1	1	1	1	0.287	0.939	1	1	1	1	1	0.33	0.64	1	1	1	0.698
E077_Duodenum_Mucosa_Digestive_erc2-chromatin15state-all-files/E077_13_ReprPC.bed	1	0.851	1	0.0517	1	1	0.29	1	1	0.204	1	0.0257	1	1	1	1	0.203	1	0.404	0.65	0.112	1	0.791	1	1	1	0.442	1	1	1	1	1	1	0.52	1	0.937	0.133	0.0768	1	0.349	0.0232	1	1	1	1	0.000706	0.756	1	0.251
E077_Duodenum_Mucosa_Digestive_erc2-chromatin15state-all-files/E077_14_ReprPCWk.bed	1	1	1	1	1	0.115	0.663	1	1	1	1	0.814	1	1	0.0136	1	0.918	1	1	1	1	1	1	0.557	1	1	1	1	1	1	1	1	1	0.594	1	0.48	1	0.804	0.966	1	1	1	1	1	1	0.479	1	0.983	1
E077_Duodenum_Mucosa_Digestive_erc2-chromatin15state-all-files/E077_15_Quies.bed	1	0.287	1	1	1	1	1	1	1	1	1	1	0.158	1	1	1	1	1	1	1	1	1	1	1	1	1	1	1	1	0.153	1	1	1	1	1	1	1	1	1	1	1	1	1	1	1	1	1	1	1
E079_Esophagus_Digestive_erc2-chromatin15state-all-files/E079_1_TssA.bed	1	0.379	1	0.111	1	1	1	0.00478	1	0.464	0.472	0.00844	1	1	0.0295	1	0.0124	1	1	0.324	0.0207	1	0.343	1	0.875	0.578	0.221	1	0.528	1	0.00576	1	0.62	1	0.106	1	0.00284	0.00376	0.219	1	0.106	1	1	0.999	0.521	0.654	0.685	1	0.191
E079_Esophagus_Digestive_erc2-chromatin15state-all-files/E079_2_TssAFlnk.bed	1	1	0.156	0.782	1	1	1	0.00219	1	0.996	1	0.442	1	1	1	0.105	0.183	1	1	1	0.124	1	1	1	0.335	1	0.777	0.573	0.156	1	1	0.911	1	1	1	1	0.00709	0.0864	1	1	1	1	1	0.0161	1	0.477	0.957	1	1
E079_Esophagus_Digestive_erc2-chromatin15state-all-files/E079_3_TxFlnk.bed	1	1	1	1	1	1	1	1	1	1	1	0.0523	1	1	1	1	1	1	1	1	1	1	1	1	1	1	1	1	0.424	1	0.501	1	1	1	1	0.793	0.604	1	0.0774	1	1	1	1	1	1	0.424	1	1	0.439
E079_Esophagus_Digestive_erc2-chromatin15state-all-files/E079_4_Tx.bed	1	1	0.646	1	0.494	1	1	0.143	1	0.992	1	0.0268	1	1	0.105	1	1	0.432	1	1	0.984	1	0.437	1	0.672	0.786	1	0.0967	0.465	1	0.253	1	0.315	1	0.0453	0.152	0.0468	0.0325	0.417	1	1	1	1	1	0.783	0.97	0.743	1	0.979
E079_Esophagus_Digestive_erc2-chromatin15state-all-files/E079_5_TxWk.bed	1	1	1	0.0135	1	1	1	3.85e-06	1	0.343	1	0.444	1	1	1	1	0.0904	1	1	1	3.78e-05	1	0.55	1	0.253	0.097	0.996	0.32	0.2	1	0.724	1	0.0481	1	0.44	1	1.35e-05	1	1	1	1	1	1	1	0.00684	0.67	1	1	0.351
E079_Esophagus_Digestive_erc2-chromatin15state-all-files/E079_6_EnhG.bed	1	0.638	0.942	1	1	1	1	0.311	1	0.488	1	0.639	1	1	0.339	0.156	0.364	1	1	1	0.092	0.581	1	1	0.000985	0.0835	1	1	0.714	1	0.16	1	1	1	1	1	1	0.0667	1	1	1	1	1	1	0.0309	0.654	1	1	0.774
E079_Esophagus_Digestive_erc2-chromatin15state-all-files/E079_7_Enh.bed	1	1	1	0.656	1	0.939	1	0.0104	1	1	0.91	0.000913	1	1	0.0109	0.844	0.633	0.789	1	1	0.962	1	0.604	1	0.0489	0.153	1	1	0.342	1	0.189	1	0.616	1	0.916	0.517	0.979	0.799	0.506	1	1	1	0.72	1	0.0215	1	1	1	0.203
E079_Esophagus_Digestive_erc2-chromatin15state-all-files/E079_8_ZNF-Rpts.bed	1	1	1	1	1	1	1	1	1	1	1	0.942	1	1	1	1	0.97	1	1	1	0.828	1	1	1	1	1	1	1	0.773	1	1	1	1	1	1	0.915	1	1	1	1	1	1	1	1	0.833	1	1	1	1
E079_Esophagus_Digestive_erc2-chromatin15state-all-files/E079_9_Het.bed	1	1	1	1	1	1	1	1	1	1	1	1	1	0.895	0.843	1	1	1	1	1	1	1	1	1	1	1	1	1	0.792	1	1	1	1	1	1	0.677	1	1	0.218	1	0.592	1	1	1	1	1	1	1	1
E079_Esophagus_Digestive_erc2-chromatin15state-all-files/E079_10_TssBiv.bed	1	1	1	1	1	1	1	1	1	0.151	1	0.0336	1	1	1	1	1	1	1	1	0.0766	1	0.125	1	1	0.484	0.69	1	1	1	1	1	1	1	1	1	0.0161	0.471	1	1	1	0.104	1	1	1	1	1	1	1
E079_Esophagus_Digestive_erc2-chromatin15state-all-files/E079_11_BivFlnk.bed	1	1	1	0.195	1	1	1	1	1	1	1	0.27	1	1	1	1	1	1	1	1	0.0748	1	1	1	1	1	1	0.483	1	1	1	1	1	1	0.284	1	1	1	1	1	1	1	1	1	1	1	1	1	1
E079_Esophagus_Digestive_erc2-chromatin15state-all-files/E079_12_EnhBiv.bed	1	1	1	1	1	1	0.466	1	1	1	1	0.439	1	1	1	1	0.157	1	1	1	0.0145	1	1	1	1	1	1	1	1	1	1	1	1	1	1	1	1	0.742	1	1	0.111	1	1	1	1	1	1	1	1
E079_Esophagus_Digestive_erc2-chromatin15state-all-files/E079_13_ReprPC.bed	1	1	1	0.944	1	1	1	1	1	0.0902	1	0.247	1	1	1	1	0.082	1	0.102	1	0.0171	1	0.186	0.291	0.767	0.142	0.172	1	1	1	1	1	1	1	1	0.52	0.401	0.846	1	0.0645	0.0189	1	1	1	1	1	0.992	1	0.406
E079_Esophagus_Digestive_erc2-chromatin15state-all-files/E079_14_ReprPCWk.bed	1	0.769	1	0.279	1	1	0.902	1	1	1	1	0.0546	1	1	1	1	0.967	1	1	0.388	1	1	1	1	1	1	1	1	0.689	1	1	1	1	1	1	1	0.396	0.799	0.541	1	1	1	1	1	1	0.0454	1	1	1
E079_Esophagus_Digestive_erc2-chromatin15state-all-files/E079_15_Quies.bed	1	0.639	1	1	1	1	0.45	1	1	1	1	1	0.0992	1	1	1	1	1	1	1	1	1	1	1	1	1	1	1	1	1	1	1	1	1	1	1	1	1	1	1	1	1	1	1	1	1	1	1	1
E084_Fetal_Intestine_Large_Digestive_erc2-chromatin15state-all-files/E084_1_TssA.bed	1	0.9	1	0.115	1	1	1	0.0072	1	0.447	0.825	0.0943	1	1	0.0438	1	0.286	1	1	0.674	0.224	1	0.986	1	0.699	0.98	0.765	1	1	1	0.15	1	0.667	1	0.468	1	0.253	0.0177	0.301	1	0.84	1	1	1	0.355	0.728	1	1	1
E084_Fetal_Intestine_Large_Digestive_erc2-chromatin15state-all-files/E084_2_TssAFlnk.bed	1	1	0.1	1	1	1	1	0.313	1	1	1	0.0664	1	1	1	0.0813	0.528	1	1	0.3	0.307	0.148	1	1	0.281	1	1	0.908	0.0733	1	0.778	1	1	1	0.243	1	0.548	0.479	1	1	1	1	1	1	0.764	0.895	0.709	1	1
E084_Fetal_Intestine_Large_Digestive_erc2-chromatin15state-all-files/E084_3_TxFlnk.bed	1	1	1	0.342	1	1	1	1	1	0.82	1	1	1	1	1	1	0.479	1	0.461	1	1	1	1	1	1	1	1	0.176	0.14	1	0.00515	1	1	1	0.375	0.538	0.0158	1	1	0.468	1	1	1	1	1	1	1	1	0.12
E084_Fetal_Intestine_Large_Digestive_erc2-chromatin15state-all-files/E084_4_Tx.bed	1	1	1	1	1	1	1	0.224	1	0.982	1	0.251	1	1	0.596	1	1	1	1	1	0.907	1	0.259	1	1	0.93	1	0.0655	0.564	1	0.564	1	0.375	1	0.741	1	0.0385	0.877	1	1	1	1	1	1	0.327	0.97	1	1	1
E084_Fetal_Intestine_Large_Digestive_erc2-chromatin15state-all-files/E084_5_TxWk.bed	1	0.71	1	0.981	1	1	1	8.23e-05	1	0.102	1	0.3	1	1	0.781	1	0.0607	1	1	1	0.00839	1	0.44	1	0.534	0.553	0.581	1	0.773	1	0.244	1	0.315	0.993	0.292	1	0.00581	0.834	1	0.93	1	1	1	1	0.331	1	1	1	0.943
E084_Fetal_Intestine_Large_Digestive_erc2-chromatin15state-all-files/E084_6_EnhG.bed	1	1	1	1	1	1	0.788	0.0738	1	1	1	0.258	1	1	0.726	1	0.528	1	1	1	0.748	1	0.343	1	1	0.0783	1	1	0.35	1	0.43	1	0.046	1	1	1	0.0766	0.586	1	1	1	1	1	1	0.606	1	1	1	0.338
E084_Fetal_Intestine_Large_Digestive_erc2-chromatin15state-all-files/E084_7_Enh.bed	0.68	1	1	0.00177	1	1	0.806	0.00131	1	0.855	1	0.0146	1	1	1	1	1	1	1	0.483	0.0283	1	1	1	0.407	0.149	1	0.123	0.46	1	0.855	1	0.135	1	0.423	1	0.103	1	0.081	1	0.857	1	1	1	0.0267	1	1	1	0.46
E084_Fetal_Intestine_Large_Digestive_erc2-chromatin15state-all-files/E084_8_ZNF-Rpts.bed	1	1	1	1	1	1	0.509	0.657	1	0.641	1	0.706	1	1	1	1	1	1	0.782	1	0.0352	1	1	1	0.0759	1	1	1	0.465	1	0.805	1	1	0.804	0.853	1	0.194	0.779	0.952	1	1	1	1	1	0.472	1	1	1	0.943
E084_Fetal_Intestine_Large_Digestive_erc2-chromatin15state-all-files/E084_9_Het.bed	1	1	1	1	1	1	1	0.201	1	0.622	0.595	1	1	1	1	1	1	1	1	1	0.754	1	1	1	1	1	1	1	0.168	1	0.957	1	1	1	1	1	1	0.772	0.0454	1	1	1	1	1	1	1	1	1	1
E084_Fetal_Intestine_Large_Digestive_erc2-chromatin15state-all-files/E084_10_TssBiv.bed	1	0.474	1	0.56	1	1	0.654	0.844	1	0.692	0.987	0.0219	1	1	1	1	0.018	1	1	1	0.000892	1	0.201	1	0.408	0.934	0.0439	0.984	1	1	0.37	1	1	1	0.146	1	0.015	0.224	1	1	0.169	1	1	0.28	1	1	1	1	1
E084_Fetal_Intestine_Large_Digestive_erc2-chromatin15state-all-files/E084_11_BivFlnk.bed	1	1	1	0.095	1	1	1	1	1	0.247	1	0.19	1	1	1	1	0.637	1	0.505	1	0.0097	1	0.351	1	1	0.363	1	0.866	1	1	0.785	1	0.859	1	0.487	1	0.0171	0.818	1	0.468	1	0.0031	1	0.247	0.579	1	0.765	1	1
E084_Fetal_Intestine_Large_Digestive_erc2-chromatin15state-all-files/E084_12_EnhBiv.bed	1	0.71	1	1	1	1	1	1	1	0.154	0.666	0.157	1	1	0.209	1	0.907	1	1	1	0.396	1	1	1	0.981	1	0.605	1	0.773	1	0.973	1	1	1	1	1	0.122	1	1	1	1	1	1	0.296	1	0.489	0.895	1	1
E084_Fetal_Intestine_Large_Digestive_erc2-chromatin15state-all-files/E084_13_ReprPC.bed	1	0.845	1	0.0545	0.417	1	0.0883	1	1	0.641	1	0.183	1	1	1	1	1	1	0.799	1	0.926	1	1	0.293	0.726	0.32	0.911	1	1	1	1	1	0.976	1	1	0.231	0.137	0.102	1	0.793	0.0283	1	1	1	0.472	0.00632	1	1	0.0446
E084_Fetal_Intestine_Large_Digestive_erc2-chromatin15state-all-files/E084_14_ReprPCWk.bed	0.0851	1	1	1	1	0.552	1	1	1	1	1	0.845	1	1	0.0184	1	0.95	0.009	1	0.684	1	1	1	1	1	1	1	1	1	1	0.907	1	1	1	1	0.827	1	0.471	1	1	0.848	1	1	0.753	1	0.442	1	1	0.908
E084_Fetal_Intestine_Large_Digestive_erc2-chromatin15state-all-files/E084_15_Quies.bed	1	0.576	1	1	1	1	1	1	1	1	1	1	0.269	1	1	1	1	1	1	1	1	1	1	1	1	1	0.756	1	1	0.946	1	1	1	1	1	1	1	1	1	1	1	1	1	1	1	1	1	0.161	1
E085_Fetal_Intestine_Small_Digestive_erc2-chromatin15state-all-files/E085_1_TssA.bed	1	0.33	1	0.207	1	1	1	0.0336	1	0.153	0.763	0.221	1	1	0.114	1	0.655	1	1	1	0.156	1	0.912	1	0.633	0.93	0.265	1	1	1	0.912	1	1	1	0.747	1	0.109	0.0668	0.234	1	0.783	1	1	1	0.797	0.929	1	1	0.984
E085_Fetal_Intestine_Small_Digestive_erc2-chromatin15state-all-files/E085_2_TssAFlnk.bed	1	1	1	1	1	1	1	0.122	1	1	1	0.184	1	1	1	0.92	0.833	1	1	0.32	0.991	1	1	1	1	1	1	1	0.438	1	0.299	1	0.933	1	0.982	1	0.218	0.0906	0.778	1	1	0.694	1	1	1	0.936	1	1	1
E085_Fetal_Intestine_Small_Digestive_erc2-chromatin15state-all-files/E085_3_TxFlnk.bed	1	1	1	0.157	1	1	1	0.1	1	0.507	1	0.295	1	1	1	1	0.338	1	0.684	1	0.135	1	1	1	0.0517	0.559	0.978	0.129	0.782	1	0.00271	1	0.999	0.711	0.00167	0.829	0.00355	1	0.281	0.696	1	1	1	1	0.322	0.929	0.835	1	0.773
E085_Fetal_Intestine_Small_Digestive_erc2-chromatin15state-all-files/E085_4_Tx.bed	1	1	1	1	1	1	1	0.00362	1	0.697	0.885	0.0682	1	1	0.0109	1	1	1	1	0.503	0.408	1	0.0285	1	0.343	1	0.835	0.498	0.363	1	0.052	1	0.318	1	0.0905	0.25	0.000357	0.228	0.0769	1	1	1	1	1	0.00089	0.327	1	1	1
E085_Fetal_Intestine_Small_Digestive_erc2-chromatin15state-all-files/E085_5_TxWk.bed	0.653	1	1	0.702	1	1	1	0.0292	1	0.299	1	0.523	1	1	1	1	0.0376	1	1	1	0.00129	1	0.909	1	0.537	0.803	1	0.157	1	1	0.825	1	0.361	1	1	1	0.00296	1	1	0.807	1	1	1	1	0.836	1	1	1	0.911
E085_Fetal_Intestine_Small_Digestive_erc2-chromatin15state-all-files/E085_6_EnhG.bed	1	1	0.65	0.806	1	1	0.707	0.00444	1	0.692	1	0.0163	1	1	1	0.216	0.513	1	1	0.626	0.706	0.282	0.79	1	0.793	0.44	1	0.0363	0.000474	1	0.573	1	0.0125	1	0.695	0.511	0.133	0.189	0.777	1	1	1	1	1	0.0642	1	0.547	1	0.191
E085_Fetal_Intestine_Small_Digestive_erc2-chromatin15state-all-files/E085_7_Enh.bed	1	1	0.65	0.0693	1	1	1	0.0872	1	1	1	0.0174	1	1	0.365	1	0.462	1	1	1	0.137	1	1	1	0.408	0.0595	1	1	0.497	1	1	1	0.368	1	0.693	1	0.297	1	0.7	1	0.456	1	1	1	0.355	1	1	1	0.21
E085_Fetal_Intestine_Small_Digestive_erc2-chromatin15state-all-files/E085_8_ZNF-Rpts.bed	1	1	1	1	1	1	1	1	1	1	1	1	1	1	0.192	1	1	1	1	1	1	1	1	1	1	0.788	1	0.744	1	1	0.837	1	1	1	0.547	1	0.449	0.656	1	1	1	1	1	1	1	1	1	1	0.737
E085_Fetal_Intestine_Small_Digestive_erc2-chromatin15state-all-files/E085_9_Het.bed	1	1	1	1	1	1	0.162	1	1	1	1	1	1	1	1	1	1	1	1	1	1	1	1	1	1	1	1	1	0.311	0.0688	0.698	1	1	1	1	0.201	1	0.921	0.144	1	1	1	1	1	1	1	1	1	0.817
E085_Fetal_Intestine_Small_Digestive_erc2-chromatin15state-all-files/E085_10_TssBiv.bed	1	1	1	0.125	0.365	1	0.162	0.265	1	1	0.968	0.0218	1	1	1	1	0.00277	1	1	1	4.25e-05	1	0.411	1	0.383	0.956	0.0412	1	1	1	0.388	1	1	1	0.475	1	0.126	0.217	1	1	0.0232	0.104	1	0.262	0.658	1	1	1	0.191
E085_Fetal_Intestine_Small_Digestive_erc2-chromatin15state-all-files/E085_11_BivFlnk.bed	1	1	1	0.541	1	1	1	1	1	0.125	1	0.643	1	1	1	1	0.704	1	1	1	0.172	1	0.408	1	1	0.909	1	0.975	1	1	0.808	1	0.905	1	0.493	1	0.0335	0.471	1	1	1	1	1	0.304	0.677	1	0.78	1	1
E085_Fetal_Intestine_Small_Digestive_erc2-chromatin15state-all-files/E085_12_EnhBiv.bed	1	1	1	0.835	1	1	1	0.0271	1	0.0272	1	0.0654	1	1	0.187	1	0.945	1	0.24	0.905	0.0265	1	1	1	1	1	0.675	1	0.352	1	0.582	1	1	1	1	1	0.064	0.24	1	0.191	1	1	1	0.323	0.0858	0.489	0.912	1	1
E085_Fetal_Intestine_Small_Digestive_erc2-chromatin15state-all-files/E085_13_ReprPC.bed	1	0.76	1	0.00802	1	0.728	0.168	1	1	0.0715	1	0.365	1	1	1	1	0.87	1	1	1	0.616	1	0.719	0.0335	0.974	0.553	0.399	1	1	1	1	1	1	0.96	1	0.468	0.177	0.387	1	0.939	0.086	1	1	0.464	1	0.000227	1	1	0.133
E085_Fetal_Intestine_Small_Digestive_erc2-chromatin15state-all-files/E085_14_ReprPCWk.bed	0.4	1	1	1	1	0.911	1	1	1	1	0.812	0.554	1	1	0.189	0.543	0.462	0.00484	1	1	1	1	1	1	1	1	1	1	1	0.077	1	1	1	1	1	1	1	0.507	0.321	1	1	1	1	1	1	0.485	0.852	0.192	1
E085_Fetal_Intestine_Small_Digestive_erc2-chromatin15state-all-files/E085_15_Quies.bed	1	0.943	1	1	1	1	1	1	1	1	1	1	0.0694	1	1	1	1	1	1	1	1	1	1	1	1	1	0.703	1	1	1	1	1	1	1	1	1	1	1	1	1	1	1	1	1	1	1	1	1	1
E092_Fetal_Stomach_Digestive_erc2-chromatin15state-all-files/E092_1_TssA.bed	1	1	1	0.138	1	1	1	0.0457	1	0.215	0.597	0.0719	1	1	0.343	1	0.3	1	1	0.93	0.0426	1	1	1	0.722	0.817	0.457	1	0.698	1	0.386	1	0.849	1	0.371	1	0.0475	0.0171	0.506	1	0.706	1	1	1	0.69	0.835	0.835	1	0.884
E092_Fetal_Stomach_Digestive_erc2-chromatin15state-all-files/E092_2_TssAFlnk.bed	1	1	1	1	1	1	1	0.832	1	1	1	0.232	1	1	1	0.91	0.768	1	1	0.0785	1	1	1	1	0.717	0.964	1	0.359	1	1	0.397	1	1	1	0.909	1	0.409	0.361	1	1	1	1	1	1	1	0.841	0.685	1	1
E092_Fetal_Stomach_Digestive_erc2-chromatin15state-all-files/E092_3_TxFlnk.bed	1	1	1	1	1	1	1	0.163	1	0.969	0.956	0.0382	1	1	1	1	0.174	1	0.461	1	0.812	1	0.798	1	0.784	1	1	1	1	1	0.25	1	1	1	0.483	1	0.00305	0.794	1	0.532	1	1	1	1	0.187	0.742	0.756	1	0.161
E092_Fetal_Stomach_Digestive_erc2-chromatin15state-all-files/E092_4_Tx.bed	1	1	1	1	1	1	1	0.0132	1	0.36	1	0.179	1	1	0.0109	1	0.854	1	1	0.94	0.0549	1	0.0356	1	1	0.67	0.865	0.347	0.229	1	0.106	1	0.225	1	0.284	0.447	7.43e-05	0.131	0.281	1	1	1	1	1	0.0261	0.929	1	1	1
E092_Fetal_Stomach_Digestive_erc2-chromatin15state-all-files/E092_5_TxWk.bed	1	1	1	0.103	1	1	1	0.0497	1	0.228	1	0.205	1	1	1	1	0.0461	1	0.593	1	0.0732	1	0.83	1	0.717	0.967	1	0.47	1	1	0.98	1	0.169	1	1	1	0.000162	1	1	0.553	1	1	1	1	0.672	1	1	1	1
E092_Fetal_Stomach_Digestive_erc2-chromatin15state-all-files/E092_6_EnhG.bed	0.626	1	1	1	1	1	1	0.137	1	0.977	1	0.547	1	1	1	0.465	0.97	1	1	1	0.406	0.871	0.728	1	0.772	0.845	1	0.157	1	1	0.342	1	1	1	1	0.958	0.201	0.958	0.0459	1	0.887	1	0.72	1	0.664	1	1	1	0.355
E092_Fetal_Stomach_Digestive_erc2-chromatin15state-all-files/E092_7_Enh.bed	1	1	1	1	1	1	1	0.00488	1	1	1	0.085	1	1	1	1	1	1	1	0.546	0.00452	1	1	1	0.447	0.578	1	1	0.589	1	1	1	1	1	0.212	1	0.0134	0.682	1	1	1	1	1	1	0.342	0.84	0.765	1	1
E092_Fetal_Stomach_Digestive_erc2-chromatin15state-all-files/E092_8_ZNF-Rpts.bed	1	1	1	0.578	1	1	0.626	1	1	0.971	1	0.625	1	1	0.539	1	1	1	1	1	0.96	1	1	1	0.725	1	1	1	1	1	0.703	1	1	1	1	0.988	0.893	0.809	0.88	1	1	1	1	1	0.63	1	1	1	1
E092_Fetal_Stomach_Digestive_erc2-chromatin15state-all-files/E092_9_Het.bed	1	1	1	1	1	1	0.656	1	1	1	1	1	1	1	0.158	1	1	1	1	1	1	1	1	1	1	1	1	1	0.689	0.00097	0.379	1	1	1	1	0.677	1	0.939	0.225	1	1	1	1	1	1	1	1	0.22	1
E092_Fetal_Stomach_Digestive_erc2-chromatin15state-all-files/E092_10_TssBiv.bed	1	0.472	1	0.596	1	1	0.614	0.287	1	1	0.998	0.0849	1	1	0.228	1	0.299	1	1	1	0.00591	1	0.453	1	0.426	0.967	0.0145	0.984	1	1	0.871	1	0.987	1	0.152	1	0.0614	0.536	0.329	1	0.165	1	1	1	1	1	0.812	1	0.236
E092_Fetal_Stomach_Digestive_erc2-chromatin15state-all-files/E092_11_BivFlnk.bed	1	1	1	0.215	1	1	1	1	1	0.186	1	0.42	1	1	1	1	0.143	1	0.776	1	0.436	1	0.594	0.685	1	1	1	1	1	1	0.524	1	1	1	0.605	1	0.023	0.156	1	0.715	1	0.00277	1	0.0151	0.864	1	0.872	1	1
E092_Fetal_Stomach_Digestive_erc2-chromatin15state-all-files/E092_12_EnhBiv.bed	1	0.686	0.313	0.186	0.536	1	0.148	0.278	1	1	0.999	0.149	1	1	0.424	0.0878	0.366	1	1	0.93	0.000443	0.62	1	1	0.831	0.895	1	1	0.0445	1	0.302	1	0.406	0.0428	1	1	0.203	0.0701	0.776	1	0.0224	1	1	0.811	0.212	0.949	1	1	0.0237
E092_Fetal_Stomach_Digestive_erc2-chromatin15state-all-files/E092_13_ReprPC.bed	0.211	1	1	0.292	0.0426	0.202	0.902	0.708	1	0.651	1	0.000383	1	0.0214	0.619	1	0.76	0.137	1	0.975	1	1	1	1	0.585	0.785	1	1	0.741	1	1	1	1	0.231	0.955	0.175	0.509	0.228	0.0994	1	0.142	1	0.72	0.927	1	3.55e-05	1	1	0.0146
E092_Fetal_Stomach_Digestive_erc2-chromatin15state-all-files/E092_14_ReprPCWk.bed	0.511	1	1	1	1	1	0.657	1	1	1	0.731	0.927	1	1	0.00217	0.987	1	0.792	1	1	1	0.635	1	1	0.915	1	1	1	0.489	1	0.746	0.391	1	1	1	0.351	1	0.742	0.0259	1	0.394	1	1	1	1	1	1	1	1
E092_Fetal_Stomach_Digestive_erc2-chromatin15state-all-files/E092_15_Quies.bed	1	0.321	1	1	1	1	1	1	1	0.897	1	1	0.00612	1	1	1	1	1	1	1	1	1	1	1	1	1	0.024	1	1	1	1	1	1	1	1	1	1	1	1	1	1	1	1	1	1	1	1	1	1
E094_Gastric_Digestive_erc2-chromatin15state-all-files/E094_1_TssA.bed	1	0.826	1	0.883	1	0.939	0.632	0.112	1	0.36	0.676	0.00908	1	1	0.0124	1	0.0399	1	1	0.977	0.00381	1	0.403	1	0.966	0.691	0.076	1	1	1	0.136	1	0.899	1	0.157	1	0.00352	0.0443	0.148	1	0.0853	0.976	1	0.897	0.414	1	0.641	1	0.149
E094_Gastric_Digestive_erc2-chromatin15state-all-files/E094_2_TssAFlnk.bed	1	1	0.156	0.574	1	1	1	0.0114	1	0.726	1	0.647	1	1	1	0.0921	0.755	1	1	0.763	0.0739	0.297	0.954	1	0.911	0.489	1	0.914	1	1	1	1	0.987	1	0.483	1	0.318	0.21	1	1	1	0.199	1	0.28	1	1	0.78	1	0.735
E094_Gastric_Digestive_erc2-chromatin15state-all-files/E094_3_TxFlnk.bed	1	1	1	1	1	1	1	1	1	1	1	0.203	1	1	1	1	0.289	1	1	1	1	1	1	1	1	0.443	1	1	1	1	0.38	1	1	1	1	1	0.0857	1	1	1	1	1	1	1	1	1	1	1	0.38
E094_Gastric_Digestive_erc2-chromatin15state-all-files/E094_4_Tx.bed	1	1	1	1	0.494	1	1	0.639	1	0.991	1	0.208	1	1	0.588	1	1	1	1	1	1	1	0.147	1	0.498	0.744	1	0.157	0.22	1	0.0442	1	0.169	1	0.157	1	0.239	0.129	0.0651	1	1	1	1	1	0.624	1	0.78	1	0.452
E094_Gastric_Digestive_erc2-chromatin15state-all-files/E094_5_TxWk.bed	1	1	1	0.00651	1	1	1	8.72e-07	1	0.00597	0.0811	0.186	1	1	0.159	1	0.208	1	1	0.853	9.99e-05	1	0.655	1	0.391	0.307	1	0.0988	0.244	1	0.25	1	0.24	1	0.374	1	3.35e-07	0.877	1	1	1	1	1	1	0.0377	0.654	1	1	0.847
E094_Gastric_Digestive_erc2-chromatin15state-all-files/E094_6_EnhG.bed	1	1	0.992	1	1	1	1	0.0656	0.857	1	1	0.279	1	1	0.342	0.783	0.669	1	1	1	0.789	0.726	1	1	0.599	0.418	1	1	0.214	1	0.887	1	1	1	1	0.18	0.555	0.719	0.131	1	1	1	1	1	0.233	0.682	1	1	0.472
E094_Gastric_Digestive_erc2-chromatin15state-all-files/E094_7_Enh.bed	1	1	1	0.485	1	1	1	0.000253	1	0.612	1	0.00176	1	1	0.489	0.798	0.222	0.15	1	1	0.304	1	0.41	1	0.216	0.817	1	0.206	0.0102	1	0.198	1	0.315	1	0.795	0.234	0.256	0.718	0.956	1	0.705	1	1	1	0.00723	1	1	1	0.0233
E094_Gastric_Digestive_erc2-chromatin15state-all-files/E094_8_ZNF-Rpts.bed	1	1	1	1	1	1	1	1	1	1	1	0.774	1	1	1	1	1	1	1	1	0.966	1	1	1	0.915	0.92	1	1	1	1	0.871	0.905	1	1	1	0.639	1	0.961	0.397	1	1	1	1	1	0.657	1	1	1	1
E094_Gastric_Digestive_erc2-chromatin15state-all-files/E094_9_Het.bed	1	1	1	1	1	1	1	1	1	1	1	0.443	1	1	1	1	1	1	1	1	1	1	1	1	1	1	1	1	1	0.936	0.883	1	1	1	1	0.676	1	0.877	1	1	1	1	1	1	1	1	1	1	1
E094_Gastric_Digestive_erc2-chromatin15state-all-files/E094_10_TssBiv.bed	1	1	1	1	1	1	1	1	1	1	1	1	1	1	1	1	1	1	1	1	1	1	1	1	1	1	1	1	1	1	1	1	1	1	1	1	1	1	1	1	1	1	1	1	1	1	1	1	1
E094_Gastric_Digestive_erc2-chromatin15state-all-files/E094_11_BivFlnk.bed	1	1	1	1	1	1	1	1	1	1	1	1	1	1	1	1	1	1	1	1	1	1	1	1	1	1	1	1	1	1	1	1	1	1	1	1	1	1	1	1	1	1	1	1	1	1	1	1	1
E094_Gastric_Digestive_erc2-chromatin15state-all-files/E094_12_EnhBiv.bed	1	1	1	1	1	1	1	1	1	1	1	1	1	1	1	1	1	1	1	1	1	1	1	1	1	1	1	1	1	1	1	1	1	1	1	1	1	1	1	1	1	1	1	1	1	1	1	1	1
E094_Gastric_Digestive_erc2-chromatin15state-all-files/E094_13_ReprPC.bed	1	1	1	1	1	1	1	1	1	1	1	1	1	1	1	1	1	1	1	1	1	1	1	1	1	1	1	1	1	1	1	1	1	1	1	1	1	1	1	1	1	1	1	1	1	1	1	1	1
E094_Gastric_Digestive_erc2-chromatin15state-all-files/E094_14_ReprPCWk.bed	1	0.847	1	0.434	1	1	1	1	1	0.605	1	0.0389	1	1	1	1	1	1	0.461	1	1	1	0.71	1	0.911	1	1	1	1	1	0.957	1	1	1	1	0.684	0.661	0.306	0.554	0.467	0.454	1	1	0.947	1	0.782	1	1	1
E094_Gastric_Digestive_erc2-chromatin15state-all-files/E094_15_Quies.bed	1	0.441	1	1	1	1	0.964	1	1	1	1	1	0.946	1	1	1	1	1	1	1	1	1	1	1	1	1	1	1	1	1	1	1	1	1	1	1	1	1	1	1	1	1	1	1	1	1	1	1	1
E101_Rectal_Mucosa_Donor_29_Digestive_erc2-chromatin15state-all-files/E101_1_TssA.bed	0.241	0.618	1	0.0329	1	1	1	0.00114	1	0.221	0.0746	0.0226	1	1	0.281	1	0.286	1	1	0.00254	0.0956	1	0.935	1	0.233	0.0173	0.185	1	0.604	1	0.00624	1	1	1	0.157	1	0.0144	0.00269	0.304	1	0.46	1	1	1	0.0763	1	0.685	1	0.472
E101_Rectal_Mucosa_Donor_29_Digestive_erc2-chromatin15state-all-files/E101_2_TssAFlnk.bed	1	1	0.618	0.389	1	1	1	0.00993	1	1	1	0.00642	1	1	1	0.56	1	1	1	0.213	0.317	1	1	1	0.226	0.642	1	0.627	0.0954	1	0.243	1	1	1	0.292	1	0.0132	0.595	0.0742	1	1	1	1	1	0.052	1	0.756	1	1
E101_Rectal_Mucosa_Donor_29_Digestive_erc2-chromatin15state-all-files/E101_3_TxFlnk.bed	1	1	1	1	1	1	1	0.747	1	1	1	0.621	1	1	1	1	0.713	1	0.542	1	1	1	1	1	1	0.358	1	1	0.723	1	0.136	1	1	1	1	0.865	0.562	0.921	1	0.64	1	1	1	1	1	1	1	1	0.203
E101_Rectal_Mucosa_Donor_29_Digestive_erc2-chromatin15state-all-files/E101_4_Tx.bed	1	1	1	1	1	1	1	0.0603	1	1	1	0.389	1	1	0.545	1	1	1	1	0.626	0.914	1	0.132	1	0.53	1	1	0.221	0.5	1	0.785	1	0.236	1	0.365	1	0.0335	0.572	1	1	1	1	1	1	0.541	1	1	1	0.845
E101_Rectal_Mucosa_Donor_29_Digestive_erc2-chromatin15state-all-files/E101_5_TxWk.bed	0.389	1	1	0.701	1	1	1	1.32e-05	1	0.00011	0.0931	0.312	1	1	0.152	1	0.092	0.553	1	1	0.0221	1	0.742	1	0.0267	0.01	0.569	0.35	0.128	1	0.0115	1	0.0125	1	0.359	1	0.00857	0.989	0.613	1	1	1	1	1	0.0404	1	1	1	0.847
E101_Rectal_Mucosa_Donor_29_Digestive_erc2-chromatin15state-all-files/E101_6_EnhG.bed	1	1	1	0.519	1	1	1	0.402	1	0.957	1	0.22	1	1	1	1	1	1	1	1	0.845	1	0.562	1	0.915	0.161	1	1	1	1	0.346	1	1	1	1	1	0.162	0.837	1	1	1	1	1	1	1	1	1	1	1
E101_Rectal_Mucosa_Donor_29_Digestive_erc2-chromatin15state-all-files/E101_7_Enh.bed	0.626	1	0.722	0.0135	1	1	1	0.00623	1	1	0.699	0.031	1	1	0.706	0.907	0.556	1	1	1	0.122	1	0.904	1	0.000926	0.361	1	0.247	0.486	1	0.288	1	0.0666	1	1	0.511	0.144	1	1	1	1	1	1	0.587	0.342	0.08	1	1	1
E101_Rectal_Mucosa_Donor_29_Digestive_erc2-chromatin15state-all-files/E101_8_ZNF-Rpts.bed	1	1	1	1	1	1	1	1	1	1	1	1	1	1	1	1	1	1	1	1	0.597	1	1	1	0.972	1	1	1	1	1	0.932	1	1	0.594	1	1	1	0.494	1	1	1	1	1	1	1	1	1	1	1
E101_Rectal_Mucosa_Donor_29_Digestive_erc2-chromatin15state-all-files/E101_9_Het.bed	1	1	1	1	1	1	0.675	1	1	1	1	0.654	1	1	1	1	1	1	1	1	1	1	1	1	1	1	1	1	1	1	0.817	1	0.987	1	1	1	1	1	0.444	1	1	1	1	0.999	1	1	1	1	1
E101_Rectal_Mucosa_Donor_29_Digestive_erc2-chromatin15state-all-files/E101_10_TssBiv.bed	0.978	1	1	1	1	1	1	1	1	1	0.429	0.724	1	1	1	1	0.0198	1	1	1	0.208	1	0.937	1	0.894	1	1	1	1	1	0.406	1	1	1	1	1	1	0.0864	1	1	1	0.137	1	1	1	1	1	1	1
E101_Rectal_Mucosa_Donor_29_Digestive_erc2-chromatin15state-all-files/E101_11_BivFlnk.bed	1	1	1	0.399	1	1	1	1	1	0.846	1	0.0268	1	1	1	1	0.129	1	1	1	0.000118	1	0.27	1	0.698	0.739	1	1	1	1	1	1	1	1	1	1	0.828	1	1	1	1	0.0905	1	0.00429	1	1	1	1	0.502
E101_Rectal_Mucosa_Donor_29_Digestive_erc2-chromatin15state-all-files/E101_12_EnhBiv.bed	0.746	0.337	1	0.414	0.163	1	1	0.143	1	0.19	1	1	1	1	1	1	1	1	1	0.598	1	1	1	1	1	1	0.585	0.834	0.51	1	1	1	1	1	1	1	0.876	1	1	1	1	1	1	1	0.151	0.738	1	1	0.572
E101_Rectal_Mucosa_Donor_29_Digestive_erc2-chromatin15state-all-files/E101_13_ReprPC.bed	1	0.241	1	0.0345	1	1	0.133	1	1	0.158	1	0.0432	1	1	1	1	0.681	1	0.11	1	0.157	0.951	0.911	0.268	1	0.92	0.865	1	1	1	1	1	1	1	1	1	0.388	0.296	1	0.0715	0.0877	1	1	1	1	0.414	1	1	0.191
E101_Rectal_Mucosa_Donor_29_Digestive_erc2-chromatin15state-all-files/E101_14_ReprPCWk.bed	1	1	1	1	1	0.202	1	1	1	1	0.993	0.389	1	1	0.0532	1	0.919	1	1	1	1	1	1	1	1	1	1	1	1	1	1	1	1	0.966	0.377	1	1	1	0.483	1	0.198	1	1	1	1	0.0107	1	0.402	0.801
E101_Rectal_Mucosa_Donor_29_Digestive_erc2-chromatin15state-all-files/E101_15_Quies.bed	1	0.266	1	1	1	1	1	1	1	1	1	1	0.0992	1	1	1	1	1	1	1	1	1	1	1	1	1	1	1	1	0.0305	1	1	1	1	1	1	1	1	1	1	1	1	1	1	1	1	1	1	1
E102_Rectal_Mucosa_Donor_31_Digestive_erc2-chromatin15state-all-files/E102_1_TssA.bed	0.834	0.845	1	0.439	1	1	1	0.0527	1	0.481	0.348	0.0277	1	1	0.112	1	0.361	1	1	0.494	0.000404	1	0.413	1	0.981	0.424	0.0427	0.987	0.729	1	0.035	1	0.54	1	0.101	1	0.000154	0.0243	0.214	1	0.169	1	1	0.908	0.722	1	1	1	1
E102_Rectal_Mucosa_Donor_31_Digestive_erc2-chromatin15state-all-files/E102_2_TssAFlnk.bed	1	1	0.65	0.0358	1	1	1	0.0132	1	0.885	1	0.0422	1	1	1	0.607	1	1	1	0.783	0.201	1	1	1	0.496	0.645	1	0.984	0.34	1	0.241	1	1	1	0.292	1	0.11	0.128	0.504	1	1	1	1	1	0.122	0.762	0.709	1	0.502
E102_Rectal_Mucosa_Donor_31_Digestive_erc2-chromatin15state-all-files/E102_3_TxFlnk.bed	1	0.782	1	1	1	1	1	1	1	1	0.811	0.0707	1	1	1	1	0.503	1	0.461	1	1	1	1	1	1	0.641	1	1	1	1	1	1	1	1	1	0.425	0.717	1	1	0.437	1	1	1	1	0.501	1	1	1	0.461
E102_Rectal_Mucosa_Donor_31_Digestive_erc2-chromatin15state-all-files/E102_4_Tx.bed	1	1	1	0.97	1	1	1	0.289	1	1	1	0.262	1	1	1	1	0.677	1	1	0.492	0.81	1	0.132	1	0.767	1	1	0.57	0.465	1	0.839	1	0.104	1	0.303	1	0.0491	0.656	1	1	1	1	1	1	0.461	1	1	1	0.687
E102_Rectal_Mucosa_Donor_31_Digestive_erc2-chromatin15state-all-files/E102_5_TxWk.bed	0.662	1	1	0.206	0.458	1	1	0.000143	1	0.0196	0.0306	0.238	1	1	0.0977	0.632	0.675	1	1	0.179	0.047	1	1	1	0.114	0.0277	0.69	0.0585	0.2	1	0.0122	1	0.169	1	0.637	1	0.00112	0.71	1	1	1	1	1	1	0.0351	0.524	1	1	1
E102_Rectal_Mucosa_Donor_31_Digestive_erc2-chromatin15state-all-files/E102_6_EnhG.bed	1	1	1	1	1	1	1	0.0237	1	0.334	1	0.251	1	1	1	1	1	1	1	1	1	1	1	1	0.669	0.678	1	1	1	1	0.402	1	1	1	1	1	0.114	0.448	1	1	1	1	1	1	0.29	1	1	1	1
E102_Rectal_Mucosa_Donor_31_Digestive_erc2-chromatin15state-all-files/E102_7_Enh.bed	1	1	1	0.0176	1	1	1	0.000653	1	0.776	1	0.0292	1	1	1	1	0.166	1	1	1	0.16	1	0.833	1	0.118	0.0432	1	0.564	0.342	1	0.266	1	0.169	1	1	0.879	0.235	1	0.244	1	1	1	1	1	0.429	0.827	0.659	1	0.758
E102_Rectal_Mucosa_Donor_31_Digestive_erc2-chromatin15state-all-files/E102_8_ZNF-Rpts.bed	1	1	1	1	1	1	1	1	1	1	1	1	1	1	1	1	1	1	1	1	0.499	1	1	1	0.911	1	1	1	1	1	0.881	1	1	1	0.637	1	1	1	1	1	1	1	1	1	1	1	1	1	1
E102_Rectal_Mucosa_Donor_31_Digestive_erc2-chromatin15state-all-files/E102_9_Het.bed	1	1	1	1	1	1	1	1	1	0.444	1	1	1	1	1	1	1	1	1	1	1	1	1	1	1	1	1	1	1	1	1	1	1	1	1	1	1	0.303	1	1	1	1	1	1	1	1	1	1	1
E102_Rectal_Mucosa_Donor_31_Digestive_erc2-chromatin15state-all-files/E102_10_TssBiv.bed	1	0.845	1	0.0734	1	1	1	1	1	0.885	0.819	0.00518	1	1	1	1	0.169	1	1	1	0.076	1	0.27	1	0.26	1	1	1	1	1	0.695	1	1	1	1	1	0.858	0.32	1	1	1	1	1	1	1	1	1	1	0.535
E102_Rectal_Mucosa_Donor_31_Digestive_erc2-chromatin15state-all-files/E102_11_BivFlnk.bed	0.763	1	1	1	1	1	1	0.465	1	0.787	1	0.389	1	1	1	1	0.0152	1	1	1	0.00934	1	0.638	1	1	0.172	1	1	1	1	1	1	1	1	1	1	1	1	1	1	1	0.00152	1	0.18	0.429	1	1	1	1
E102_Rectal_Mucosa_Donor_31_Digestive_erc2-chromatin15state-all-files/E102_12_EnhBiv.bed	0.854	0.379	1	0.11	1	1	0.509	0.644	1	0.507	1	1	1	1	1	1	1	1	1	1	1	1	1	1	1	1	0.605	1	1	1	1	1	0.849	1	1	1	0.933	0.143	1	1	1	1	1	0.25	0.541	1	1	1	0.167
E102_Rectal_Mucosa_Donor_31_Digestive_erc2-chromatin15state-all-files/E102_13_ReprPC.bed	1	0.584	1	0.0484	1	1	0.901	1	1	0.00644	1	0.203	1	1	1	1	0.102	1	0.105	1	0.0275	0.91	0.562	0.235	1	1	0.709	1	1	1	1	1	1	1	0.739	1	0.041	0.369	1	0.0652	0.0219	1	1	1	1	0.00659	0.966	1	0.59
E102_Rectal_Mucosa_Donor_31_Digestive_erc2-chromatin15state-all-files/E102_14_ReprPCWk.bed	0.943	1	1	1	1	1	0.162	1	1	1	1	0.342	1	1	0.068	0.851	0.939	1	1	1	1	0.823	1	0.947	1	1	1	1	1	1	0.805	1	1	0.361	0.786	1	1	1	0.27	1	1	1	1	1	1	0.285	1	1	1
E102_Rectal_Mucosa_Donor_31_Digestive_erc2-chromatin15state-all-files/E102_15_Quies.bed	1	0.665	1	1	1	1	1	1	1	1	1	1	0.148	1	1	1	1	1	1	1	1	1	1	1	1	1	0.888	1	1	0.00484	1	1	1	1	1	1	1	1	1	1	1	1	1	1	1	1	1	0.0862	1
E106_Sigmoid_Colon_Digestive_erc2-chromatin15state-all-files/E106_1_TssA.bed	0.787	0.462	1	0.0606	1	0.945	1	0.000369	1	0.0907	0.649	0.0155	1	1	0.0245	1	0.0746	1	1	0.242	0.0116	1	0.243	1	0.118	0.385	0.284	0.91	0.681	1	0.212	1	0.849	1	0.0406	1	0.0561	0.0405	0.251	1	0.1	1	1	1	0.0858	0.78	0.849	1	1
E106_Sigmoid_Colon_Digestive_erc2-chromatin15state-all-files/E106_2_TssAFlnk.bed	1	1	1	0.117	1	1	1	0.0548	1	0.622	0.946	1	1	1	1	1	0.262	1	1	0.784	1	1	1	1	0.462	0.923	1	0.908	1	1	0.126	1	1	1	1	1	0.122	0.493	1	1	1	1	1	1	1	1	1	1	1
E106_Sigmoid_Colon_Digestive_erc2-chromatin15state-all-files/E106_3_TxFlnk.bed	1	1	1	1	1	1	1	1	1	1	1	0.16	1	1	1	1	1	1	1	1	1	1	1	1	1	1	1	1	1	1	1	1	1	1	1	1	0.335	1	1	1	1	1	1	1	1	1	1	1	0.292
E106_Sigmoid_Colon_Digestive_erc2-chromatin15state-all-files/E106_4_Tx.bed	1	1	1	1	1	1	1	0.16	1	0.776	1	0.0845	1	1	0.124	0.622	1	1	1	0.602	1	1	0.261	1	0.287	0.98	1	0.35	0.287	1	0.637	1	0.1	1	0.284	0.354	0.0752	0.545	0.486	1	1	1	1	1	0.297	1	1	1	0.46
E106_Sigmoid_Colon_Digestive_erc2-chromatin15state-all-files/E106_5_TxWk.bed	1	1	1	0.116	0.581	1	1	6.2e-06	1	0.0106	0.00379	0.0493	1	1	1	1	0.231	1	1	0.613	1.42e-05	1	0.473	1	0.101	5.85e-05	1	0.194	0.493	1	0.0201	1	0.315	1	0.656	1	0.000949	0.955	1	1	1	1	1	1	0.029	1	1	1	0.454
E106_Sigmoid_Colon_Digestive_erc2-chromatin15state-all-files/E106_6_EnhG.bed	1	1	1	1	1	1	1	0.0601	1	0.994	1	1	1	1	1	1	1	0.0547	0.966	1	0.416	1	1	1	1	0.00535	1	1	0.598	1	0.0442	1	1	1	1	1	0.358	0.258	1	1	1	1	1	1	0.585	1	1	1	1
E106_Sigmoid_Colon_Digestive_erc2-chromatin15state-all-files/E106_7_Enh.bed	0.939	1	0.913	0.208	1	1	1	3e-05	1	1	1	0.203	1	1	1	1	0.449	1	1	0.899	0.403	1	0.798	1	0.000157	0.157	1	1	0.0577	1	0.0848	1	0.368	1	0.316	0.718	0.129	0.961	0.393	1	1	1	1	1	0.0624	0.416	0.756	1	0.129
E106_Sigmoid_Colon_Digestive_erc2-chromatin15state-all-files/E106_8_ZNF-Rpts.bed	1	1	1	1	1	1	1	1	1	1	1	1	1	1	1	1	1	1	1	1	0.113	1	1	1	0.981	1	1	1	1	1	0.532	1	1	1	1	1	0.798	1	1	1	1	1	1	1	1	1	1	1	1
E106_Sigmoid_Colon_Digestive_erc2-chromatin15state-all-files/E106_9_Het.bed	1	1	1	1	1	1	1	1	1	1	1	1	1	1	1	1	1	1	1	1	1	1	1	1	1	1	1	1	1	1	0.871	1	1	1	1	0.703	1	0.876	0.282	1	1	1	1	1	1	1	1	1	1
E106_Sigmoid_Colon_Digestive_erc2-chromatin15state-all-files/E106_10_TssBiv.bed	1	1	1	1	1	1	1	1	1	1	0.676	0.321	1	1	1	1	0.443	1	1	1	0.506	1	0.467	1	0.566	0.591	0.0439	1	1	1	0.449	1	1	1	1	1	0.539	0.128	1	1	1	1	1	0.2	1	1	1	1	1
E106_Sigmoid_Colon_Digestive_erc2-chromatin15state-all-files/E106_11_BivFlnk.bed	1	1	1	1	1	1	1	1	1	1	1	1	1	1	1	1	1	1	1	1	1	1	1	1	1	1	1	0.321	1	1	1	1	0.24	1	0.109	1	0.000868	1	1	1	1	1	1	1	1	1	1	1	1
E106_Sigmoid_Colon_Digestive_erc2-chromatin15state-all-files/E106_12_EnhBiv.bed	0.939	0.447	1	0.103	1	1	1	0.722	1	1	1	0.221	1	1	1	1	0.713	1	1	1	0.172	1	0.904	1	0.796	0.918	1	1	0.593	1	1	1	1	1	1	1	0.535	1	1	1	0.216	0.00284	1	1	0.187	1	1	1	0.203
E106_Sigmoid_Colon_Digestive_erc2-chromatin15state-all-files/E106_13_ReprPC.bed	1	1	1	0.0336	1	1	1	1	1	0.068	1	0.202	1	1	1	1	0.14	1	0.102	1	0.0466	1	0.699	0.196	1	0.734	0.835	1	1	1	1	1	1	1	1	1	0.019	0.655	1	0.0652	0.168	1	1	0.961	0.897	0.222	0.866	1	0.472
E106_Sigmoid_Colon_Digestive_erc2-chromatin15state-all-files/E106_14_ReprPCWk.bed	1	1	1	1	1	1	0.638	1	1	1	1	0.643	1	1	0.0109	1	1	1	1	1	1	1	1	1	1	1	1	1	1	0.0514	1	1	1	1	1	0.177	1	0.927	0.923	1	0.359	1	1	1	1	0.137	1	0.11	1
E106_Sigmoid_Colon_Digestive_erc2-chromatin15state-all-files/E106_15_Quies.bed	1	0.0826	1	1	1	1	1	1	1	0.883	1	1	0.0177	1	1	1	1	1	0.507	1	1	1	1	1	1	1	0.684	1	1	1	1	1	1	1	1	1	1	1	1	0.62	1	1	1	1	1	1	1	1	1
E109_Small_Intestine_Digestive_erc2-chromatin15state-all-files/E109_1_TssA.bed	1	0.42	1	0.134	1	0.912	1	0.0027	1	0.214	0.27	0.0233	1	1	0.0122	1	0.0566	1	1	0.449	0.0148	1	0.34	1	0.227	0.585	0.231	0.888	0.377	1	0.164	1	0.392	1	0.0571	1	0.0399	0.0221	0.156	1	0.086	1	1	1	0.184	1	0.835	1	1
E109_Small_Intestine_Digestive_erc2-chromatin15state-all-files/E109_2_TssAFlnk.bed	1	1	1	0.377	1	1	1	0.536	1	1	1	1	1	1	1	1	0.465	1	1	1	1	1	1	1	1	1	1	1	1	1	0.2	1	1	1	1	1	0.29	0.694	1	1	1	1	1	1	1	1	0.685	1	1
E109_Small_Intestine_Digestive_erc2-chromatin15state-all-files/E109_3_TxFlnk.bed	1	1	1	1	1	1	1	1	1	1	1	0.0621	1	1	1	1	1	1	1	1	1	1	1	1	1	1	1	1	1	1	1	1	1	1	1	1	0.137	1	1	1	1	1	1	1	1	1	1	1	1
E109_Small_Intestine_Digestive_erc2-chromatin15state-all-files/E109_4_Tx.bed	1	1	1	1	0.222	1	1	0.352	1	0.47	1	0.145	1	1	1	1	1	1	1	0.925	1	1	0.261	1	1	1	1	1	1	0.946	0.374	1	0.57	1	0.107	1	0.77	0.715	1	1	1	1	1	1	0.714	1	0.835	1	1
E109_Small_Intestine_Digestive_erc2-chromatin15state-all-files/E109_5_TxWk.bed	0.664	1	1	0.226	1	1	1	9.94e-07	1	0.252	0.206	0.165	1	1	0.202	1	0.0815	0.0811	1	0.334	0.00301	1	0.467	1	0.00798	0.0143	1	0.17	0.251	1	0.0887	1	0.0666	1	0.716	1	1.35e-05	0.754	1	1	1	1	1	1	0.00089	0.505	1	1	0.943
E109_Small_Intestine_Digestive_erc2-chromatin15state-all-files/E109_6_EnhG.bed	1	1	1	1	1	1	1	0.374	1	1	1	0.075	1	1	1	1	1	1	1	1	1	1	1	1	1	0.524	1	0.548	1	1	1	1	0.509	1	1	1	1	0.687	0.282	1	1	1	1	1	0.382	1	1	1	0.454
E109_Small_Intestine_Digestive_erc2-chromatin15state-all-files/E109_7_Enh.bed	1	1	1	0.178	1	1	1	0.00332	1	0.372	1	0.00729	1	1	1	1	0.497	1	1	1	0.868	1	1	1	0.0162	0.054	1	0.0988	0.188	1	0.0237	1	0.593	1	0.502	0.278	0.0671	0.58	0.71	1	0.491	1	1	1	0.162	1	1	1	0.673
E109_Small_Intestine_Digestive_erc2-chromatin15state-all-files/E109_8_ZNF-Rpts.bed	1	1	1	1	1	1	1	1	1	1	1	1	1	1	1	1	1	1	1	1	0.775	1	1	1	1	1	1	1	1	1	0.748	1	1	1	1	1	1	0.888	1	1	1	1	1	1	1	1	1	1	1
E109_Small_Intestine_Digestive_erc2-chromatin15state-all-files/E109_9_Het.bed	1	1	1	1	1	1	1	1	1	1	1	1	1	1	1	1	1	1	0.743	1	0.62	1	1	1	1	1	1	1	1	0.539	0.935	1	1	1	1	1	1	0.933	1	1	0.105	1	1	1	1	1	1	1	1
E109_Small_Intestine_Digestive_erc2-chromatin15state-all-files/E109_10_TssBiv.bed	1	1	1	1	1	1	1	0.379	1	0.688	1	1	1	1	1	1	1	1	1	1	0.0259	1	1	1	0.55	0.604	0.265	0.595	1	1	1	1	1	1	0.317	1	0.0389	0.572	1	1	1	0.0442	1	1	1	1	1	1	1
E109_Small_Intestine_Digestive_erc2-chromatin15state-all-files/E109_11_BivFlnk.bed	1	1	1	1	1	1	1	1	1	1	1	1	1	1	1	1	1	1	1	1	1	1	1	1	1	1	1	1	1	1	1	1	1	1	1	1	1	1	1	1	1	1	1	1	1	1	1	1	1
E109_Small_Intestine_Digestive_erc2-chromatin15state-all-files/E109_12_EnhBiv.bed	0.626	0.248	1	1	1	1	1	1	1	0.801	1	1	1	1	1	1	0.519	1	1	1	0.689	1	1	1	1	1	1	1	1	1	1	1	1	1	1	1	0.749	0.742	1	1	0.194	1	1	0.229	1	0.654	1	1	0.472
E109_Small_Intestine_Digestive_erc2-chromatin15state-all-files/E109_13_ReprPC.bed	1	1	1	0.0159	1	1	0.999	1	1	0.672	1	0.206	1	1	1	1	0.286	1	0.176	1	0.0234	1	0.945	0.447	1	0.93	0.185	1	1	1	1	1	0.787	0.147	1	0.794	0.363	0.604	1	0.137	0.0958	1	1	1	0.902	0.209	1	1	0.324
E109_Small_Intestine_Digestive_erc2-chromatin15state-all-files/E109_14_ReprPCWk.bed	1	1	1	0.782	1	0.441	0.697	1	1	1	1	1	1	0.7	0.241	1	1	1	1	1	1	1	1	1	1	1	1	1	1	0.177	1	1	1	1	0.637	0.145	1	0.674	1	1	0.854	1	1	1	1	0.864	1	1	1
E109_Small_Intestine_Digestive_erc2-chromatin15state-all-files/E109_15_Quies.bed	1	0.0396	1	1	1	1	1	1	1	0.612	1	1	0.148	1	1	1	1	1	1	1	1	1	1	1	1	1	0.627	1	1	1	1	1	1	1	1	1	1	1	1	1	1	1	1	1	1	1	1	1	1
E110_Stomach_Mucosa_Digestive_erc2-chromatin15state-all-files/E110_1_TssA.bed	1	0.701	1	0.333	1	0.98	0.657	0.0713	1	0.805	0.905	0.052	1	1	0.0361	1	0.126	1	1	0.899	0.114	1	0.72	1	0.648	0.784	0.239	1	0.95	1	0.314	1	0.779	1	0.605	1	0.736	0.016	0.949	1	0.108	0.981	1	1	0.175	0.751	1	1	0.845
E110_Stomach_Mucosa_Digestive_erc2-chromatin15state-all-files/E110_2_TssAFlnk.bed	1	1	1	1	1	1	1	0.163	1	0.957	0.939	0.0889	1	1	1	0.868	1	1	1	1	0.865	1	1	1	0.39	0.604	1	0.34	0.305	1	0.0237	1	1	1	0.374	1	0.0535	0.541	0.0999	1	1	1	1	1	0.584	0.78	0.643	1	1
E110_Stomach_Mucosa_Digestive_erc2-chromatin15state-all-files/E110_3_TxFlnk.bed	1	1	1	1	1	1	1	0.193	1	1	1	0.138	1	1	1	1	1	1	1	1	1	1	1	1	1	1	1	1	1	1	1	1	1	1	1	0.563	0.294	1	1	1	1	1	1	1	0.209	1	1	1	1
E110_Stomach_Mucosa_Digestive_erc2-chromatin15state-all-files/E110_4_Tx.bed	1	1	1	1	1	1	1	0.763	1	1	1	1	1	1	0.548	1	0.982	1	1	1	0.308	1	0.356	1	0.884	0.845	1	0.537	1	1	0.645	1	1	1	1	1	0.56	1	1	1	1	1	1	1	0.233	1	1	1	0.472
E110_Stomach_Mucosa_Digestive_erc2-chromatin15state-all-files/E110_5_TxWk.bed	1	1	1	0.408	1	1	1	5.38e-05	1	0.687	0.133	0.0804	1	1	0.185	1	0.415	1	1	1	0.102	1	0.205	1	0.0682	0.847	0.996	0.116	0.0041	1	0.0144	1	0.0101	1	0.29	1	0.000176	0.751	1	1	1	1	1	1	0.196	1	0.685	1	0.629
E110_Stomach_Mucosa_Digestive_erc2-chromatin15state-all-files/E110_6_EnhG.bed	1	1	1	1	1	1	1	0.0855	1	1	1	0.299	1	1	1	1	0.884	1	0.176	1	1	1	1	1	0.537	0.062	1	1	0.755	1	1	1	1	1	1	1	0.178	0.98	1	0.697	1	1	1	1	0.707	1	1	1	0.768
E110_Stomach_Mucosa_Digestive_erc2-chromatin15state-all-files/E110_7_Enh.bed	1	1	0.532	0.0193	1	1	1	3.55e-05	1	0.902	1	0.00154	1	1	0.413	0.287	0.276	1	1	1	0.0262	1	0.586	1	0.082	0.274	1	0.347	0.184	1	0.946	1	0.269	1	0.369	0.988	0.212	0.945	0.725	1	1	1	1	1	0.0333	0.929	0.912	1	0.151
E110_Stomach_Mucosa_Digestive_erc2-chromatin15state-all-files/E110_8_ZNF-Rpts.bed	1	1	1	1	1	1	1	1	1	1	1	1	1	1	1	1	1	1	1	1	0.573	1	1	1	1	1	1	1	1	1	1	1	1	1	1	1	1	1	1	1	1	1	1	1	1	1	1	1	1
E110_Stomach_Mucosa_Digestive_erc2-chromatin15state-all-files/E110_9_Het.bed	1	1	1	1	1	1	1	1	1	1	1	1	1	1	1	1	1	1	1	1	0.984	1	1	1	0.933	1	1	1	1	1	0.477	1	1	1	1	1	1	0.511	0.29	1	1	1	1	1	1	1	1	1	1
E110_Stomach_Mucosa_Digestive_erc2-chromatin15state-all-files/E110_10_TssBiv.bed	0.626	0.671	1	1	1	1	1	0.37	1	0.693	1	0.342	1	1	1	1	1	1	1	1	0.559	1	1	1	1	1	1	0.577	1	1	1	1	1	1	0.312	1	0.638	1	1	1	1	1	1	1	0.396	1	1	1	1
E110_Stomach_Mucosa_Digestive_erc2-chromatin15state-all-files/E110_11_BivFlnk.bed	1	1	1	1	1	1	1	1	1	0.0118	1	0.0703	1	1	1	1	0.408	1	1	1	0.154	1	0.559	1	1	1	1	1	1	1	1	1	0.527	1	1	1	0.212	1	1	1	1	0.0442	1	0.00712	1	1	1	1	1
E110_Stomach_Mucosa_Digestive_erc2-chromatin15state-all-files/E110_12_EnhBiv.bed	1	0.85	1	0.103	0.396	1	1	1	1	0.778	1	0.282	1	1	0.214	1	0.536	1	0.908	1	0.000832	1	1	1	0.729	0.419	1	1	0.863	1	1	1	1	1	1	1	0.129	0.369	1	0.809	1	1	1	0.371	0.154	1	1	1	0.454
E110_Stomach_Mucosa_Digestive_erc2-chromatin15state-all-files/E110_13_ReprPC.bed	1	0.41	1	0.00362	1	1	0.401	1	1	0.126	0.825	0.0226	1	1	0.962	1	0.126	1	0.457	1	0.00865	1	0.808	0.196	0.999	1	0.425	1	0.856	1	1	1	1	0.707	0.359	1	0.0404	0.304	1	0.405	0.033	1	1	1	1	0.000918	0.83	1	0.049
E110_Stomach_Mucosa_Digestive_erc2-chromatin15state-all-files/E110_14_ReprPCWk.bed	0.213	1	1	1	1	0.856	0.325	1	1	1	0.561	0.368	1	1	0.105	1	0.919	1	1	0.315	1	0.878	1	0.526	0.957	1	1	0.984	0.714	1	0.89	0.908	1	0.474	0.326	1	0.492	0.304	0.748	1	0.709	1	0.476	0.863	1	0.19	1	1	0.847
E110_Stomach_Mucosa_Digestive_erc2-chromatin15state-all-files/E110_15_Quies.bed	1	0.371	1	1	1	1	1	1	1	1	1	1	0.671	1	1	1	1	1	1	1	1	1	1	1	1	1	1	1	1	0.782	1	1	1	1	1	1	1	1	1	1	1	1	1	1	1	1	1	1	1
E122_HUVEC_Umbilical_Vein_Endothelial_Primary_Cells_Endothelial_erc2-chromatin15state-all-files/E122_1_TssA.bed	1	0.521	1	0.0662	1	0.878	0.476	0.02	1	0.395	1	0.0387	1	1	0.0238	1	0.0178	1	1	1	0.000318	1	0.54	1	0.957	1	0.0888	1	0.773	1	0.264	1	1	1	0.483	1	0.0918	0.0768	0.0563	1	0.0877	0.563	1	1	0.781	0.902	1	1	0.673
E122_HUVEC_Umbilical_Vein_Endothelial_Primary_Cells_Endothelial_erc2-chromatin15state-all-files/E122_2_TssAFlnk.bed	1	1	0.71	0.268	1	1	1	0.0144	1	0.992	0.998	0.119	1	1	1	0.768	0.731	1	1	0.493	0.372	1	1	1	0.0489	0.789	1	1	0.727	1	0.271	1	1	1	0.414	1	0.0841	0.369	1	0.758	1	1	1	1	0.00291	0.738	0.604	1	1
E122_HUVEC_Umbilical_Vein_Endothelial_Primary_Cells_Endothelial_erc2-chromatin15state-all-files/E122_3_TxFlnk.bed	1	0.847	1	1	1	1	1	0.644	1	0.409	1	0.164	1	1	1	1	1	1	1	1	1	1	0.703	1	1	1	1	1	1	1	1	1	1	1	1	1	0.00183	1	0.506	1	1	1	1	1	0.56	1	1	1	1
E122_HUVEC_Umbilical_Vein_Endothelial_Primary_Cells_Endothelial_erc2-chromatin15state-all-files/E122_4_Tx.bed	1	1	0.722	1	1	1	1	0.0545	1	1	1	0.976	1	1	1	1	1	1	1	1	1	1	0.371	1	1	1	1	0.446	0.585	1	1	1	0.135	1	0.193	1	0.0483	1	1	1	1	1	1	1	0.138	1	1	1	1
E122_HUVEC_Umbilical_Vein_Endothelial_Primary_Cells_Endothelial_erc2-chromatin15state-all-files/E122_5_TxWk.bed	1	1	1	1	1	1	1	0.0109	1	0.00863	0.507	0.0336	1	1	0.106	0.872	0.207	1	0.885	1	0.000383	1	0.285	1	0.741	0.0336	0.249	1	0.612	1	0.423	1	0.169	1	1	1	0.000796	0.876	1	1	0.739	1	1	1	0.532	0.347	0.765	1	0.889
E122_HUVEC_Umbilical_Vein_Endothelial_Primary_Cells_Endothelial_erc2-chromatin15state-all-files/E122_6_EnhG.bed	1	1	1	0.243	1	1	1	0.392	1	0.897	1	0.272	1	1	1	1	0.971	1	1	1	0.851	1	0.827	1	1	0.274	1	0.873	0.793	1	1	1	0.933	1	1	1	0.456	0.945	1	1	1	1	1	0.84	0.786	1	1	1	0.403
E122_HUVEC_Umbilical_Vein_Endothelial_Primary_Cells_Endothelial_erc2-chromatin15state-all-files/E122_7_Enh.bed	1	1	1	0.327	1	1	1	1.07e-05	1	1	1	0.102	1	1	0.997	1	0.661	1	1	1	0.035	1	1	1	0.16	0.198	1	0.888	0.32	1	0.517	1	1	1	1	1	2.32e-05	0.572	0.731	1	1	1	1	1	0.0155	0.738	1	1	0.132
E122_HUVEC_Umbilical_Vein_Endothelial_Primary_Cells_Endothelial_erc2-chromatin15state-all-files/E122_8_ZNF-Rpts.bed	1	1	1	1	1	1	1	1	1	1	1	1	1	1	1	1	1	1	1	1	0.202	1	1	1	0.692	1	1	1	1	1	0.677	1	1	1	1	1	1	1	1	1	1	1	1	1	1	1	1	1	1
E122_HUVEC_Umbilical_Vein_Endothelial_Primary_Cells_Endothelial_erc2-chromatin15state-all-files/E122_9_Het.bed	1	1	1	1	1	1	1	1	1	1	1	1	1	1	1	1	1	1	1	1	1	1	1	1	1	1	1	1	1	5.25e-07	1	1	1	1	1	0.445	1	0.719	1	1	1	1	1	1	1	1	1	2.44e-08	1
E122_HUVEC_Umbilical_Vein_Endothelial_Primary_Cells_Endothelial_erc2-chromatin15state-all-files/E122_10_TssBiv.bed	1	1	1	1	1	1	1	1	1	0.455	1	0.0241	1	1	1	1	1	1	1	1	1	1	1	1	1	1	1	1	1	1	1	1	1	1	1	1	1	1	1	1	1	1	1	1	1	1	1	1	1
E122_HUVEC_Umbilical_Vein_Endothelial_Primary_Cells_Endothelial_erc2-chromatin15state-all-files/E122_11_BivFlnk.bed	1	0.78	1	1	1	1	1	1	1	0.807	1	0.435	1	1	1	1	0.116	1	1	1	0.647	1	0.684	1	1	0.749	1	1	1	1	0.645	1	1	1	1	1	1	0.674	1	1	1	0.113	1	0.00712	1	1	0.709	1	1
E122_HUVEC_Umbilical_Vein_Endothelial_Primary_Cells_Endothelial_erc2-chromatin15state-all-files/E122_12_EnhBiv.bed	1	0.379	1	1	1	1	1	1	1	0.555	1	0.608	1	1	1	1	1	1	0.5	1	0.116	1	1	1	1	1	1	0.744	0.598	1	1	1	1	1	0.12	1	0.184	0.501	1	0.468	1	1	1	1	1	0.786	0.78	1	0.17
E122_HUVEC_Umbilical_Vein_Endothelial_Primary_Cells_Endothelial_erc2-chromatin15state-all-files/E122_13_ReprPC.bed	1	0.763	1	0.0206	1	1	0.1	1	1	0.739	0.986	0.0631	1	1	1	1	0.384	1	0.461	1	0.433	1	0.812	0.0196	0.107	0.567	0.896	1	0.731	1	0.201	1	1	0.728	1	0.297	0.295	0.723	1	0.466	0.178	1	1	1	0.747	1	1	1	0.6
E122_HUVEC_Umbilical_Vein_Endothelial_Primary_Cells_Endothelial_erc2-chromatin15state-all-files/E122_14_ReprPCWk.bed	0.00518	1	1	0.744	1	0.441	0.42	1	1	1	0.8	0.764	1	1	0.214	0.156	1	1	1	0.00376	1	0.878	1	1	0.957	1	1	1	0.864	1	0.0209	9.79e-05	1	1	0.538	0.997	1	0.0623	0.962	1	0.278	1	1	1	1	0.27	1	1	0.143
E122_HUVEC_Umbilical_Vein_Endothelial_Primary_Cells_Endothelial_erc2-chromatin15state-all-files/E122_15_Quies.bed	1	0.197	1	1	1	1	1	1	1	0.897	1	1	0.364	0.925	1	1	1	1	1	1	1	1	1	1	1	1	0.996	1	1	1	1	1	1	1	1	1	1	1	0.983	1	1	1	1	1	1	1	1	1	1
E027_Breast_Myoepithelial_Primary_Cells_Epithelial_erc2-chromatin15state-all-files/E027_1_TssA.bed	1	0.513	1	0.061	1	1	0.6	0.038	1	0.457	0.608	0.00181	1	1	0.174	1	0.0268	1	1	0.0723	0.00183	1	0.209	1	0.551	0.691	0.0118	1	0.61	1	0.141	1	1	1	0.0877	1	0.0202	0.00218	0.329	1	0.258	1	1	1	0.0624	0.555	1	1	1
E027_Breast_Myoepithelial_Primary_Cells_Epithelial_erc2-chromatin15state-all-files/E027_2_TssAFlnk.bed	1	1	0.535	1	1	1	1	0.558	1	0.612	0.91	0.217	1	1	0.173	0.448	0.769	1	1	0.249	0.187	0.951	0.467	1	0.77	0.783	1	0.419	0.184	1	0.21	1	0.809	1	0.656	1	0.0595	0.285	0.315	1	1	1	1	0.147	1	1	0.819	1	0.872
E027_Breast_Myoepithelial_Primary_Cells_Epithelial_erc2-chromatin15state-all-files/E027_3_TxFlnk.bed	0.226	1	1	1	0.494	1	1	0.0178	1	0.374	1	0.305	1	1	1	1	1	0.331	0.597	0.899	0.618	1	1	1	1	0.934	1	1	1	1	0.92	1	1	1	1	1	1	0.961	0.541	0.62	1	1	1	1	0.0867	1	0.835	1	0.0854
E027_Breast_Myoepithelial_Primary_Cells_Epithelial_erc2-chromatin15state-all-files/E027_4_Tx.bed	1	1	1	1	1	1	1	0.0873	1	0.832	1	0.644	1	1	0.329	1	0.982	1	1	1	0.678	1	0.0397	1	1	0.919	1	0.0363	0.622	1	0.212	1	0.112	1	0.303	1	0.000326	0.54	1	1	1	1	1	1	0.419	1	1	1	1
E027_Breast_Myoepithelial_Primary_Cells_Epithelial_erc2-chromatin15state-all-files/E027_5_TxWk.bed	1	1	1	0.965	1	1	1	0.133	1	0.185	0.551	0.435	1	1	1	1	0.159	1	1	1	0.000219	1	1	1	0.447	1	1	0.75	0.447	1	1	1	1	1	0.981	1	0.000314	0.917	1	1	1	1	1	1	0.359	1	1	1	0.544
E027_Breast_Myoepithelial_Primary_Cells_Epithelial_erc2-chromatin15state-all-files/E027_6_EnhG.bed	1	1	1	1	0.0161	1	1	0.00323	1	1	1	0.00645	1	1	1	1	0.415	1	1	1	0.345	1	1	1	0.126	0.297	1	1	0.438	1	0.587	1	0.538	1	1	1	0.509	0.882	0.901	1	1	1	1	1	0.318	1	1	1	0.943
E027_Breast_Myoepithelial_Primary_Cells_Epithelial_erc2-chromatin15state-all-files/E027_7_Enh.bed	1	1	1	0.225	1	1	1	0.000369	1	1	1	0.00329	1	1	0.382	0.156	0.224	1	1	1	0.0161	1	0.561	1	0.465	0.302	1	1	0.815	1	0.483	1	0.429	1	0.952	0.354	0.064	0.989	0.419	1	1	1	1	1	0.165	0.0012	0.604	1	0.0435
E027_Breast_Myoepithelial_Primary_Cells_Epithelial_erc2-chromatin15state-all-files/E027_8_ZNF-Rpts.bed	1	1	1	0.266	1	1	1	1	1	1	1	1	1	1	1	1	1	1	1	1	0.739	1	1	1	0.77	1	1	1	1	1	0.141	1	1	1	1	1	0.988	1	1	1	1	1	1	1	1	1	1	1	1
E027_Breast_Myoepithelial_Primary_Cells_Epithelial_erc2-chromatin15state-all-files/E027_9_Het.bed	1	1	1	1	1	1	0.162	1	1	0.65	1	1	1	1	1	1	1	1	1	1	1	1	1	1	1	1	0.996	1	0.698	0.00346	0.441	1	1	1	0.899	0.338	1	1	0.0419	1	0.348	1	1	1	1	1	1	0.007	1
E027_Breast_Myoepithelial_Primary_Cells_Epithelial_erc2-chromatin15state-all-files/E027_10_TssBiv.bed	1	1	1	1	1	1	1	1	1	0.682	1	0.344	1	1	1	1	1	1	1	1	1	1	1	1	1	1	0.874	1	1	1	1	1	1	1	1	1	0.554	0.153	1	1	1	1	1	1	1	1	1	1	1
E027_Breast_Myoepithelial_Primary_Cells_Epithelial_erc2-chromatin15state-all-files/E027_11_BivFlnk.bed	1	0.219	1	1	1	1	1	0.415	1	0.787	1	0.0798	1	0.505	1	1	0.0937	1	1	1	0.000702	1	1	1	1	0.667	1	1	1	1	0.501	1	1	1	1	1	1	1	1	1	1	0.104	1	1	1	1	1	1	0.472
E027_Breast_Myoepithelial_Primary_Cells_Epithelial_erc2-chromatin15state-all-files/E027_12_EnhBiv.bed	1	1	1	0.266	1	1	1	0.973	1	0.666	1	0.469	1	1	1	1	1	1	0.776	1	0.0814	1	0.68	1	1	0.316	1	1	1	1	1	1	1	1	1	1	0.548	0.511	1	0.744	0.24	1	1	1	0.819	0.000706	1	1	0.795
E027_Breast_Myoepithelial_Primary_Cells_Epithelial_erc2-chromatin15state-all-files/E027_13_ReprPC.bed	1	1	1	0.32	1	1	0.381	1	1	1	1	0.474	1	0.851	0.154	1	0.633	1	1	0.333	1	1	1	1	1	1	1	1	1	1	1	1	1	0.474	1	0.983	1	1	0.794	1	0.233	1	1	1	1	0.738	1	1	0.433
E027_Breast_Myoepithelial_Primary_Cells_Epithelial_erc2-chromatin15state-all-files/E027_14_ReprPCWk.bed	1	1	1	1	1	0.877	1	1	1	1	1	1	1	1	0.428	1	1	1	1	1	1	1	1	0.603	1	1	1	1	1	1	0.954	1	1	0.0428	1	1	1	1	0.0199	1	1	1	1	1	1	1	1	1	1
E027_Breast_Myoepithelial_Primary_Cells_Epithelial_erc2-chromatin15state-all-files/E027_15_Quies.bed	0.631	0.176	1	1	1	1	1	1	1	0.918	1	1	0.157	1	1	1	1	1	1	1	1	1	1	1	1	0.918	0.239	1	1	1	1	1	1	1	1	1	1	1	1	1	1	1	1	1	1	1	1	1	1
E028_Breast_variant_Human_Mammary_Epithelial_Cells_(vHMEC)_Epithelial_erc2-chromatin15state-all-files/E028_1_TssA.bed	1	0.55	1	0.176	1	1	0.824	0.0244	1	0.32	0.987	0.0303	1	1	0.0941	1	0.366	1	1	0.551	0.0368	1	0.41	1	0.759	1	0.576	1	0.731	1	0.0896	1	1	1	0.212	1	0.213	0.00317	0.222	1	0.176	1	1	1	0.257	0.899	1	1	0.947
E028_Breast_variant_Human_Mammary_Epithelial_Cells_(vHMEC)_Epithelial_erc2-chromatin15state-all-files/E028_2_TssAFlnk.bed	1	0.851	1	1	1	1	1	0.359	1	1	0.89	0.161	1	1	1	0.819	0.0468	1	1	0.504	0.0431	0.849	1	1	0.343	1	1	1	1	1	0.313	1	0.641	1	0.841	1	0.257	0.549	1	1	1	1	1	1	0.239	0.77	0.63	1	1
E028_Breast_variant_Human_Mammary_Epithelial_Cells_(vHMEC)_Epithelial_erc2-chromatin15state-all-files/E028_3_TxFlnk.bed	1	0.586	1	1	1	1	1	0.379	1	0.59	1	1	1	1	1	1	1	1	1	1	1	1	0.504	1	0.572	1	1	1	1	1	1	1	1	1	1	1	0.521	1	0.365	1	1	1	1	1	1	1	1	1	0.342
E028_Breast_variant_Human_Mammary_Epithelial_Cells_(vHMEC)_Epithelial_erc2-chromatin15state-all-files/E028_4_Tx.bed	1	1	1	0.452	1	1	1	0.477	1	1	1	1	1	1	1	1	1	1	1	1	1	1	0.92	1	1	1	1	0.211	1	1	0.9	1	1	1	0.935	1	0.295	1	1	1	1	1	1	1	1	1	1	1	1
E028_Breast_variant_Human_Mammary_Epithelial_Cells_(vHMEC)_Epithelial_erc2-chromatin15state-all-files/E028_5_TxWk.bed	1	0.886	1	1	1	1	1	0.000475	1	0.185	0.819	0.0835	1	1	0.816	1	0.00693	1	1	0.335	0.000737	1	0.351	1	0.418	0.13	0.298	0.0363	0.306	1	0.274	1	0.102	1	0.575	1	2.63e-06	0.533	1	1	1	1	1	1	0.0572	0.74	1	1	1
E028_Breast_variant_Human_Mammary_Epithelial_Cells_(vHMEC)_Epithelial_erc2-chromatin15state-all-files/E028_6_EnhG.bed	0.834	0.943	1	1	1	1	0.902	1	1	1	1	0.105	1	1	0.893	1	1	1	1	1	1	1	0.647	1	1	0.363	1	1	0.828	1	1	1	1	1	1	1	1	1	1	1	0.389	1	1	1	0.521	1	1	1	0.861
E028_Breast_variant_Human_Mammary_Epithelial_Cells_(vHMEC)_Epithelial_erc2-chromatin15state-all-files/E028_7_Enh.bed	1	1	1	0.164	1	1	1	0.00661	1	1	1	0.00148	1	1	1	0.66	0.51	1	0.697	1	0.579	1	1	1	0.0203	0.0161	1	1	0.466	1	0.314	1	0.781	1	1	1	0.318	0.641	0.608	0.724	1	1	1	1	0.297	0.398	1	1	0.122
E028_Breast_variant_Human_Mammary_Epithelial_Cells_(vHMEC)_Epithelial_erc2-chromatin15state-all-files/E028_8_ZNF-Rpts.bed	1	1	1	1	1	1	1	1	1	1	1	1	1	1	1	1	1	1	1	1	0.965	1	1	1	0.918	1	1	1	1	1	1	1	1	1	1	1	1	0.798	1	1	1	1	1	1	1	1	1	1	1
E028_Breast_variant_Human_Mammary_Epithelial_Cells_(vHMEC)_Epithelial_erc2-chromatin15state-all-files/E028_9_Het.bed	1	1	1	1	1	1	1	1	1	1	1	1	1	1	1	1	1	1	1	1	1	1	0.562	1	1	1	1	1	1	1	1	1	1	1	1	0.44	1	0.524	1	1	1	1	1	0.92	1	1	1	1	1
E028_Breast_variant_Human_Mammary_Epithelial_Cells_(vHMEC)_Epithelial_erc2-chromatin15state-all-files/E028_10_TssBiv.bed	1	1	1	1	1	1	1	0.216	1	0.502	1	0.157	1	1	1	1	0.248	1	1	1	0.0385	1	1	1	1	0.342	1	0.419	1	1	1	1	1	1	0.202	1	0.0496	0.373	1	1	1	0.0442	1	1	0.194	1	1	1	1
E028_Breast_variant_Human_Mammary_Epithelial_Cells_(vHMEC)_Epithelial_erc2-chromatin15state-all-files/E028_11_BivFlnk.bed	1	1	1	1	1	1	1	1	1	1	1	1	1	1	1	1	1	1	1	1	1	1	1	1	1	1	0.35	1	1	1	1	1	1	1	1	1	1	1	1	1	1	1	1	1	1	1	1	1	1
E028_Breast_variant_Human_Mammary_Epithelial_Cells_(vHMEC)_Epithelial_erc2-chromatin15state-all-files/E028_12_EnhBiv.bed	1	1	1	1	1	1	1	1	1	1	1	0.0587	1	1	1	1	0.239	1	1	1	0.869	1	0.394	1	1	1	1	0.78	0.589	1	0.302	1	1	1	1	1	0.955	0.471	1	1	0.151	1	1	0.163	1	1	1	1	0.183
E028_Breast_variant_Human_Mammary_Epithelial_Cells_(vHMEC)_Epithelial_erc2-chromatin15state-all-files/E028_13_ReprPC.bed	1	1	1	0.434	1	1	1	1	1	0.692	1	0.012	1	1	0.593	1	0.0454	1	1	1	0.0823	1	1	0.391	0.00961	0.92	0.535	1	1	1	1	1	1	1	1	1	0.339	0.165	0.895	0.939	0.596	0.381	0.411	0.0315	1	0.346	1	1	0.0136
E028_Breast_variant_Human_Mammary_Epithelial_Cells_(vHMEC)_Epithelial_erc2-chromatin15state-all-files/E028_14_ReprPCWk.bed	1	1	0.368	1	1	0.126	1	1	0.0451	1	0.303	0.803	1	0.132	0.0109	0.359	1	1	1	0.248	0.848	0.149	1	1	1	1	1	1	0.369	1	0.852	0.0791	1	0.0574	0.447	0.587	0.737	0.536	0.215	1	1	1	1	1	1	0.0408	0.934	1	1
E028_Breast_variant_Human_Mammary_Epithelial_Cells_(vHMEC)_Epithelial_erc2-chromatin15state-all-files/E028_15_Quies.bed	1	1	1	1	1	1	0.543	1	1	0.631	1	1	0.203	1	1	1	1	1	1	1	1	1	1	1	1	1	0.675	1	1	0.0114	1	1	1	1	1	1	1	1	1	1	1	1	1	1	1	1	1	0.0969	1
E055_Foreskin_Fibroblast_Primary_Cells_skin01_Epithelial_erc2-chromatin15state-all-files/E055_1_TssA.bed	1	0.248	1	0.0536	1	1	1	0.291	1	0.487	0.838	0.00669	1	1	0.265	1	0.523	1	1	0.751	0.00101	1	0.794	1	0.967	0.604	0.43	1	0.878	1	0.122	1	1	1	0.562	1	0.139	0.129	0.956	1	0.34	1	1	1	0.65	0.347	0.992	1	1
E055_Foreskin_Fibroblast_Primary_Cells_skin01_Epithelial_erc2-chromatin15state-all-files/E055_2_TssAFlnk.bed	1	1	1	1	1	1	0.656	0.197	1	1	1	0.00668	1	1	1	1	0.701	1	1	0.493	0.000684	1	1	1	0.317	1	1	0.423	0.00915	1	0.161	1	0.811	0.712	0.591	1	0.0473	0.156	1	1	1	1	1	1	0.135	0.907	1	1	0.831
E055_Foreskin_Fibroblast_Primary_Cells_skin01_Epithelial_erc2-chromatin15state-all-files/E055_3_TxFlnk.bed	1	1	0.1	1	1	1	1	0.00978	1	0.442	1	0.000383	1	1	1	0.0109	0.609	1	1	1	0.00443	0.0616	1	1	0.0665	0.114	1	1	0.466	1	0.371	1	1	1	1	1	1.26e-05	0.636	0.0454	1	1	1	1	1	0.239	0.00057	1	1	0.203
E055_Foreskin_Fibroblast_Primary_Cells_skin01_Epithelial_erc2-chromatin15state-all-files/E055_4_Tx.bed	1	1	1	1	1	1	1	0.0704	1	0.741	1	0.843	1	1	0.0302	1	1	1	1	1	0.877	1	0.127	1	1	1	1	0.279	0.438	1	0.195	1	0.194	1	0.188	0.672	0.00218	0.951	0.657	1	1	1	1	1	0.237	1	1	1	0.831
E055_Foreskin_Fibroblast_Primary_Cells_skin01_Epithelial_erc2-chromatin15state-all-files/E055_5_TxWk.bed	1	0.654	1	0.494	1	1	1	0.471	1	0.0254	1	0.134	1	1	1	1	0.064	1	1	1	6.08e-05	1	0.508	1	1	0.147	0.536	0.176	0.914	1	0.415	1	0.216	1	1	1	2.25e-05	1	1	1	1	1	1	1	0.861	1	1	1	0.831
E055_Foreskin_Fibroblast_Primary_Cells_skin01_Epithelial_erc2-chromatin15state-all-files/E055_6_EnhG.bed	1	1	1	1	1	1	0.865	0.0654	1	1	0.574	0.00583	1	1	0.0311	0.628	0.0235	1	1	1	0.249	1	1	1	0.851	0.685	1	1	1	1	0.137	1	0.468	1	0.749	1	0.474	0.837	0.0651	1	1	1	1	1	0.0351	0.887	0.756	1	1
E055_Foreskin_Fibroblast_Primary_Cells_skin01_Epithelial_erc2-chromatin15state-all-files/E055_7_Enh.bed	1	1	1	0.0248	1	1	1	0.000751	1	1	1	0.075	1	1	1	1	0.258	1	0.461	1	0.0623	1	1	1	0.593	0.214	1	1	1	1	0.502	1	0.811	1	0.724	0.639	0.0932	1	1	0.729	1	1	1	1	0.00952	0.406	1	1	0.269
E055_Foreskin_Fibroblast_Primary_Cells_skin01_Epithelial_erc2-chromatin15state-all-files/E055_8_ZNF-Rpts.bed	1	1	1	1	1	1	1	0.446	1	0.977	1	1	1	1	1	1	0.981	1	1	1	0.0899	1	1	1	1	1	1	1	1	1	1	1	1	1	1	1	1	0.876	1	1	1	1	1	1	0.364	1	1	1	0.816
E055_Foreskin_Fibroblast_Primary_Cells_skin01_Epithelial_erc2-chromatin15state-all-files/E055_9_Het.bed	1	1	1	1	1	1	0.555	1	1	1	1	1	1	1	1	1	1	1	1	1	1	1	0.951	1	1	1	1	1	1	0.599	1	1	1	1	1	1	1	1	0.366	1	1	1	1	1	1	1	1	1	1
E055_Foreskin_Fibroblast_Primary_Cells_skin01_Epithelial_erc2-chromatin15state-all-files/E055_10_TssBiv.bed	1	0.906	1	0.0166	1	0.411	1	0.644	1	1	0.91	0.169	1	1	1	1	0.602	1	0.108	1	0.0322	1	1	0.487	0.729	0.866	0.656	1	1	1	0.0848	1	1	1	0.468	1	0.00459	0.391	0.219	0.0652	1	1	1	1	1	0.729	1	1	0.582
E055_Foreskin_Fibroblast_Primary_Cells_skin01_Epithelial_erc2-chromatin15state-all-files/E055_11_BivFlnk.bed	0.547	0.769	1	0.791	1	1	1	1	1	0.0862	1	0.00616	1	1	1	1	0.428	1	1	1	0.0936	1	0.331	0.875	0.999	0.315	0.703	1	0.322	1	0.979	1	1	1	0.189	1	0.157	0.718	1	1	1	0.00235	1	1	0.866	1	0.881	1	0.395
E055_Foreskin_Fibroblast_Primary_Cells_skin01_Epithelial_erc2-chromatin15state-all-files/E055_12_EnhBiv.bed	1	1	1	0.0776	1	1	0.601	0.272	1	0.334	1	0.105	1	1	0.0438	1	0.385	0.198	1	1	0.216	1	0.921	1	1	0.93	1	1	0.644	1	1	1	0.151	1	0.267	1	0.533	0.0357	0.603	1	0.0219	1	1	0.742	0.187	1	0.78	1	0.0258
E055_Foreskin_Fibroblast_Primary_Cells_skin01_Epithelial_erc2-chromatin15state-all-files/E055_13_ReprPC.bed	0.568	1	0.69	0.102	0.0194	0.592	0.697	1	1	1	0.852	0.0338	1	1	0.00849	1	0.685	0.331	1	0.347	1	1	1	1	0.0665	0.9	1	1	0.465	1	0.9	1	1	0.284	0.656	0.0915	0.94	0.00945	0.493	1	0.266	1	0.00881	1	1	0.00698	1	1	0.0892
E055_Foreskin_Fibroblast_Primary_Cells_skin01_Epithelial_erc2-chromatin15state-all-files/E055_14_ReprPCWk.bed	0.389	1	1	1	1	0.912	0.378	1	0.857	1	0.0758	1	1	1	0.0391	0.345	0.408	1	1	0.755	0.965	0.392	1	1	0.00321	0.634	1	1	1	0.333	0.13	7.2e-05	1	1	0.739	0.201	0.982	0.643	0.0564	1	0.325	1	1	1	0.611	1	1	1	1
E055_Foreskin_Fibroblast_Primary_Cells_skin01_Epithelial_erc2-chromatin15state-all-files/E055_15_Quies.bed	1	0.00137	1	1	1	1	1	1	1	0.154	1	1	0.0177	1	1	1	1	1	1	1	1	1	1	1	1	1	0.00313	1	1	1	1	1	1	1	1	1	1	1	1	1	1	1	1	1	1	1	1	1	1
E056_Foreskin_Fibroblast_Primary_Cells_skin02_Epithelial_erc2-chromatin15state-all-files/E056_1_TssA.bed	1	0.576	1	0.395	1	1	0.717	0.392	1	0.386	0.703	0.00362	1	1	0.19	1	0.46	1	1	0.905	0.000405	1	0.699	1	0.727	1	0.625	0.866	1	1	0.325	1	1	1	0.359	1	0.128	0.21	1	1	0.32	1	1	1	0.48	0.238	0.765	1	0.863
E056_Foreskin_Fibroblast_Primary_Cells_skin02_Epithelial_erc2-chromatin15state-all-files/E056_2_TssAFlnk.bed	1	1	1	1	1	1	0.672	0.198	1	0.225	1	0.046	1	1	1	1	0.843	1	1	0.251	0.0223	1	0.407	1	0.233	0.67	0.0858	1	0.00932	1	0.443	1	0.849	0.381	0.193	1	0.0263	0.0847	0.702	1	0.601	1	1	0.155	0.411	0.117	0.872	1	0.342
E056_Foreskin_Fibroblast_Primary_Cells_skin02_Epithelial_erc2-chromatin15state-all-files/E056_3_TxFlnk.bed	1	1	0.000692	1	0.637	1	1	0.00955	1	0.801	1	0.00237	1	1	0.4	0.000843	0.517	1	1	1	0.000199	0.000623	1	1	0.118	0.45	1	0.503	0.00168	1	0.00837	1	0.169	1	0.284	1	1.11e-06	0.144	0.0164	1	1	0.285	1	1	0.382	1	1	1	0.0676
E056_Foreskin_Fibroblast_Primary_Cells_skin02_Epithelial_erc2-chromatin15state-all-files/E056_4_Tx.bed	1	1	1	1	1	1	1	0.163	1	0.687	1	0.922	1	1	0.0423	1	1	0.774	1	1	1	1	0.394	1	1	1	1	0.252	0.652	1	0.342	1	0.879	1	0.747	0.181	0.153	1	0.907	1	1	1	1	1	0.342	1	1	1	0.984
E056_Foreskin_Fibroblast_Primary_Cells_skin02_Epithelial_erc2-chromatin15state-all-files/E056_5_TxWk.bed	1	1	1	0.0929	1	1	1	0.116	1	0.0327	1	0.283	1	1	1	1	0.00596	1	1	1	0.00074	1	0.703	0.609	1	0.223	1	0.47	1	1	0.439	1	0.24	1	0.622	1	9.13e-06	1	1	1	1	1	1	1	0.454	1	1	1	0.895
E056_Foreskin_Fibroblast_Primary_Cells_skin02_Epithelial_erc2-chromatin15state-all-files/E056_6_EnhG.bed	1	1	1	0.628	1	1	1	0.0211	1	0.682	1	0.272	1	1	0.787	1	0.122	1	1	1	0.0931	1	0.205	1	0.462	0.178	1	1	0.854	1	0.545	1	1	1	0.601	1	0.132	0.291	0.0202	1	0.907	1	1	1	0.037	0.0389	0.451	1	0.621
E056_Foreskin_Fibroblast_Primary_Cells_skin02_Epithelial_erc2-chromatin15state-all-files/E056_7_Enh.bed	1	1	0.854	1	1	1	1	0.00191	1	1	0.939	0.0228	1	1	1	0.682	0.366	1	0.5	1	0.0562	1	1	1	0.592	0.191	1	0.677	0.973	1	0.372	1	0.631	1	1	1	0.0386	0.713	1	0.48	1	1	1	1	0.00684	0.153	1	1	0.699
E056_Foreskin_Fibroblast_Primary_Cells_skin02_Epithelial_erc2-chromatin15state-all-files/E056_8_ZNF-Rpts.bed	1	0.988	1	1	1	1	1	0.132	1	1	1	1	1	1	1	1	1	1	1	1	0.0189	1	1	1	1	1	1	1	1	1	1	0.704	1	1	1	1	1	0.823	0.219	1	1	1	1	1	0.518	1	1	1	0.526
E056_Foreskin_Fibroblast_Primary_Cells_skin02_Epithelial_erc2-chromatin15state-all-files/E056_9_Het.bed	1	1	1	1	1	1	1	1	1	1	1	1	1	1	1	1	1	1	1	1	1	1	0.608	1	1	1	1	1	1	0.0302	1	1	1	1	1	1	1	1	0.482	1	1	1	1	1	1	1	1	1	1
E056_Foreskin_Fibroblast_Primary_Cells_skin02_Epithelial_erc2-chromatin15state-all-files/E056_10_TssBiv.bed	1	1	0.65	0.215	0.377	0.327	1	1	1	0.126	0.552	0.814	1	1	1	0.52	0.85	1	0.693	1	0.157	0.297	1	1	0.516	0.0855	1	1	0.723	1	0.469	1	1	1	0.603	1	0.429	0.67	0.281	0.64	1	0.0905	1	1	0.788	1	1	1	0.0868
E056_Foreskin_Fibroblast_Primary_Cells_skin02_Epithelial_erc2-chromatin15state-all-files/E056_11_BivFlnk.bed	0.589	0.32	1	0.769	1	1	0.574	1	1	0.682	1	0.000646	1	1	1	1	0.143	1	1	1	0.000734	1	0.327	0.203	1	0.71	1	0.497	0.304	1	1	1	1	1	0.601	1	0.309	0.379	1	1	0.0214	0.0704	1	0.288	1	1	1	1	0.355
E056_Foreskin_Fibroblast_Primary_Cells_skin02_Epithelial_erc2-chromatin15state-all-files/E056_12_EnhBiv.bed	1	1	1	0.385	1	1	1	0.0859	1	1	0.348	0.274	1	1	0.0059	1	1	0.173	1	1	0.643	1	0.861	1	0.537	1	1	0.389	0.129	1	0.316	1	0.965	1	1	1	0.136	0.273	1	1	0.344	1	1	1	0.714	0.121	1	1	0.151
E056_Foreskin_Fibroblast_Primary_Cells_skin02_Epithelial_erc2-chromatin15state-all-files/E056_13_ReprPC.bed	0.801	1	1	0.132	1	1	0.632	1	1	0.992	1	0.0303	1	0.328	0.295	1	0.0398	0.164	1	0.0789	1	1	1	1	0.537	1	1	1	0.799	1	1	1	1	0.342	1	0.152	0.982	0.0662	0.88	1	0.0937	1	1	1	1	0.596	0.866	1	0.0865
E056_Foreskin_Fibroblast_Primary_Cells_skin02_Epithelial_erc2-chromatin15state-all-files/E056_14_ReprPCWk.bed	0.00666	1	1	1	1	0.939	0.2	0.796	0.637	1	0.162	0.95	1	0.446	0.000157	0.156	1	1	1	0.994	1	0.832	1	1	0.0184	0.38	1	1	1	1	0.186	0.000783	1	1	0.468	0.183	1	0.0623	0.0164	1	0.493	1	1	1	0.657	0.762	1	1	1
E056_Foreskin_Fibroblast_Primary_Cells_skin02_Epithelial_erc2-chromatin15state-all-files/E056_15_Quies.bed	1	0.00323	1	1	1	1	1	1	1	0.206	1	1	0.0433	1	1	1	1	1	0.616	1	1	1	1	1	1	1	0.00239	1	1	1	1	1	1	1	1	1	1	1	1	0.802	1	1	1	1	1	1	1	1	1
E057_Foreskin_Keratinocyte_Primary_Cells_skin02_Epithelial_erc2-chromatin15state-all-files/E057_1_TssA.bed	1	0.345	1	0.0354	1	1	0.999	0.199	1	0.362	0.0657	0.435	1	1	1	1	0.134	1	1	0.157	0.187	1	0.209	1	0.911	0.731	0.0173	1	1	1	0.141	1	1	1	0.27	1	0.0643	0.06	0.76	1	0.266	1	1	1	0.175	1	1	1	0.988
E057_Foreskin_Keratinocyte_Primary_Cells_skin02_Epithelial_erc2-chromatin15state-all-files/E057_2_TssAFlnk.bed	1	0.71	0.535	1	1	1	1	0.779	1	1	1	0.0336	1	1	1	0.156	0.116	1	1	0.598	0.0269	1	1	1	0.505	0.696	1	0.521	0.0558	1	0.151	1	1	1	0.745	1	0.0473	0.0357	0.157	1	1	1	1	0.941	1	0.406	0.685	1	1
E057_Foreskin_Keratinocyte_Primary_Cells_skin02_Epithelial_erc2-chromatin15state-all-files/E057_3_TxFlnk.bed	1	1	0.156	0.858	1	1	1	0.193	1	0.185	1	0.0258	1	1	1	0.156	0.996	1	0.814	1	0.112	0.056	1	1	0.152	0.358	1	1	0.469	1	0.692	1	1	1	0.694	1	0.212	0.819	0.517	0.842	1	1	1	1	0.933	1	0.973	1	0.145
E057_Foreskin_Keratinocyte_Primary_Cells_skin02_Epithelial_erc2-chromatin15state-all-files/E057_4_Tx.bed	1	1	1	1	1	1	1	0.0534	1	0.807	0.939	0.646	1	1	0.0206	1	1	1	1	1	0.571	1	0.327	1	1	1	1	0.0934	0.48	1	0.156	1	0.432	1	0.186	0.44	0.00535	0.798	1	1	1	1	1	1	0.0835	1	0.891	1	0.721
E057_Foreskin_Keratinocyte_Primary_Cells_skin02_Epithelial_erc2-chromatin15state-all-files/E057_5_TxWk.bed	1	0.653	1	0.021	1	1	1	0.000276	1	0.385	1	0.0572	1	1	1	1	0.00494	1	1	0.555	0.0545	1	0.808	1	0.122	0.303	0.336	0.0392	0.496	1	0.738	1	0.182	1	0.637	1	0.00236	0.855	0.506	1	1	1	1	1	0.16	1	1	1	1
E057_Foreskin_Keratinocyte_Primary_Cells_skin02_Epithelial_erc2-chromatin15state-all-files/E057_6_EnhG.bed	1	1	1	1	1	1	0.956	0.353	1	0.741	1	0.12	1	1	0.25	0.456	0.781	1	1	1	0.766	1	1	1	0.185	0.866	1	1	0.465	1	0.2	1	0.709	1	1	1	1	0.961	1	1	1	1	1	1	0.341	1	1	1	0.266
E057_Foreskin_Keratinocyte_Primary_Cells_skin02_Epithelial_erc2-chromatin15state-all-files/E057_7_Enh.bed	0.899	1	1	0.409	0.637	1	1	0.0153	1	0.953	1	0.0427	1	1	0.44	1	0.905	1	1	1	0.819	1	1	1	0.722	0.0791	1	1	1	1	0.722	1	0.334	1	1	1	0.461	1	1	0.832	1	1	1	1	0.0778	0.391	1	1	0.191
E057_Foreskin_Keratinocyte_Primary_Cells_skin02_Epithelial_erc2-chromatin15state-all-files/E057_8_ZNF-Rpts.bed	1	1	1	1	1	1	1	1	1	1	1	1	1	1	1	0.567	1	1	1	1	0.936	1	1	1	0.914	1	1	1	1	1	0.863	1	1	1	1	0.654	1	0.32	1	1	1	1	1	1	1	1	1	1	1
E057_Foreskin_Keratinocyte_Primary_Cells_skin02_Epithelial_erc2-chromatin15state-all-files/E057_9_Het.bed	1	1	1	1	1	1	0.956	1	1	1	1	1	1	1	1	1	1	1	1	1	1	1	1	1	1	1	1	1	0.792	0.00239	1	1	1	1	1	1	1	0.772	0.397	1	1	1	1	1	1	1	1	1	1
E057_Foreskin_Keratinocyte_Primary_Cells_skin02_Epithelial_erc2-chromatin15state-all-files/E057_10_TssBiv.bed	1	0.64	1	1	1	0.411	1	0.00456	1	0.588	1	0.00436	1	1	0.00833	1	0.379	1	0.597	1	0.0145	1	1	0.758	0.915	1	1	1	0.318	1	0.187	1	1	1	0.186	1	0.00717	0.0108	0.122	0.558	1	1	1	1	0.31	0.902	0.866	1	1
E057_Foreskin_Keratinocyte_Primary_Cells_skin02_Epithelial_erc2-chromatin15state-all-files/E057_11_BivFlnk.bed	1	1	1	1	1	1	1	0.796	1	0.181	1	0.0216	1	1	1	1	0.713	1	1	1	0.000775	1	0.413	1	1	0.454	0.844	1	1	1	1	1	0.974	1	1	1	0.651	0.86	1	1	1	0.00235	1	0.0103	0.632	1	1	1	0.671
E057_Foreskin_Keratinocyte_Primary_Cells_skin02_Epithelial_erc2-chromatin15state-all-files/E057_12_EnhBiv.bed	1	1	1	0.236	1	1	0.2	0.924	1	0.616	0.149	0.877	1	1	1	1	1	1	1	0.929	0.0194	1	1	1	1	1	1	1	1	0.751	1	1	1	1	1	1	0.476	0.482	1	1	0.228	1	0.72	1	0.278	0.488	1	1	0.74
E057_Foreskin_Keratinocyte_Primary_Cells_skin02_Epithelial_erc2-chromatin15state-all-files/E057_13_ReprPC.bed	1	1	1	0.229	1	1	1	1	1	1	1	0.7	1	0.605	0.812	1	0.223	1	1	0.965	0.843	1	1	1	0.572	0.307	1	1	1	1	1	1	1	0.00297	0.99	0.066	0.329	0.528	1	1	0.0811	1	1	1	1	0.113	1	1	1
E057_Foreskin_Keratinocyte_Primary_Cells_skin02_Epithelial_erc2-chromatin15state-all-files/E057_14_ReprPCWk.bed	0.66	1	1	1	1	1	0.154	1	1	1	1	0.798	1	1	0.00274	1	1	1	1	0.889	1	1	1	0.291	1	1	1	1	1	1	0.435	0.208	1	1	1	0.114	1	0.458	0.6	1	0.0755	1	1	1	1	0.719	1	1	0.553
E057_Foreskin_Keratinocyte_Primary_Cells_skin02_Epithelial_erc2-chromatin15state-all-files/E057_15_Quies.bed	1	0.353	1	1	1	1	1	1	1	1	1	1	0.334	1	1	1	1	1	1	1	1	1	1	1	1	1	0.599	1	1	1	1	1	1	1	1	1	1	1	1	1	1	1	1	1	1	1	1	1	1
E058_Foreskin_Keratinocyte_Primary_Cells_skin03_Epithelial_erc2-chromatin15state-all-files/E058_1_TssA.bed	1	0.214	1	0.0929	1	1	0.956	0.00488	1	0.341	0.757	0.139	1	1	1	1	0.232	1	1	0.608	0.0927	1	0.438	1	0.856	0.682	0.0884	1	0.495	1	0.121	1	1	1	1	1	0.0378	0.00218	0.725	1	0.24	1	1	1	0.0283	0.976	1	1	0.979
E058_Foreskin_Keratinocyte_Primary_Cells_skin03_Epithelial_erc2-chromatin15state-all-files/E058_2_TssAFlnk.bed	0.787	1	0.535	1	1	1	1	0.555	1	0.59	1	0.172	1	1	0.895	0.204	0.286	1	1	0.324	0.353	1	0.742	1	0.233	0.322	1	0.312	0.143	1	0.0907	1	0.631	1	0.815	1	0.262	0.344	0.56	1	1	1	1	1	1	0.477	0.981	1	0.23
E058_Foreskin_Keratinocyte_Primary_Cells_skin03_Epithelial_erc2-chromatin15state-all-files/E058_3_TxFlnk.bed	1	0.301	0.767	0.852	1	1	0.948	0.193	1	0.897	0.703	0.0257	1	1	1	0.779	0.51	1	0.76	0.38	0.242	0.709	1	1	0.0087	0.691	1	1	1	1	0.346	1	1	1	0.708	1	0.0857	0.291	0.17	0.802	1	1	1	1	0.938	1	0.549	1	0.406
E058_Foreskin_Keratinocyte_Primary_Cells_skin03_Epithelial_erc2-chromatin15state-all-files/E058_4_Tx.bed	1	1	1	0.986	1	1	1	0.063	1	0.765	1	0.503	1	1	0.084	1	1	1	1	1	0.69	1	0.265	1	0.893	0.918	1	0.0363	0.535	1	0.305	1	0.334	1	0.579	1	0.0527	0.599	1	1	1	1	1	1	0.246	0.853	0.975	1	1
E058_Foreskin_Keratinocyte_Primary_Cells_skin03_Epithelial_erc2-chromatin15state-all-files/E058_5_TxWk.bed	1	1	1	0.0669	1	1	1	0.00245	1	0.328	1	0.186	1	1	1	1	0.0127	1	0.582	1	0.0112	1	0.812	1	0.0629	0.0773	0.576	0.109	0.23	1	0.963	1	0.15	1	0.406	1	0.000208	1	1	0.765	1	1	1	1	0.252	0.52	1	1	0.527
E058_Foreskin_Keratinocyte_Primary_Cells_skin03_Epithelial_erc2-chromatin15state-all-files/E058_6_EnhG.bed	1	1	1	1	1	1	1	0.00418	1	0.515	1	0.0546	1	1	0.12	1	0.863	1	1	1	0.867	1	1	1	1	0.304	1	1	0.82	1	0.283	1	1	1	0.889	0.953	0.0618	0.828	1	1	1	1	1	1	0.227	1	1	1	1
E058_Foreskin_Keratinocyte_Primary_Cells_skin03_Epithelial_erc2-chromatin15state-all-files/E058_7_Enh.bed	0.916	1	1	0.132	0.733	1	1	0.0199	1	0.807	1	0.0131	1	1	1	1	0.437	1	1	1	0.198	1	1	1	0.817	0.261	1	1	1	1	0.434	1	0.933	1	1	1	0.072	0.675	1	1	1	1	1	1	0.0358	0.424	1	1	0.908
E058_Foreskin_Keratinocyte_Primary_Cells_skin03_Epithelial_erc2-chromatin15state-all-files/E058_8_ZNF-Rpts.bed	1	1	1	0.888	1	1	1	1	1	0.584	1	1	1	1	1	0.684	1	1	1	1	1	1	1	1	1	1	1	1	1	1	0.645	1	1	1	1	1	1	0.892	1	1	1	1	1	1	1	1	1	1	1
E058_Foreskin_Keratinocyte_Primary_Cells_skin03_Epithelial_erc2-chromatin15state-all-files/E058_9_Het.bed	1	1	1	1	1	1	1	1	1	1	1	1	1	1	1	1	1	1	1	1	1	1	1	1	1	1	1	1	1	1	1	1	1	1	1	0.827	1	1	1	1	1	1	1	1	1	1	1	1	1
E058_Foreskin_Keratinocyte_Primary_Cells_skin03_Epithelial_erc2-chromatin15state-all-files/E058_10_TssBiv.bed	1	0.876	1	0.475	1	0.202	1	1	1	1	1	0.169	1	1	0.105	1	0.588	1	1	1	0.000285	1	1	1	1	0.328	1	0.866	1	1	0.245	1	1	1	0.0406	1	0.214	0.355	0.207	1	1	1	1	1	1	1	1	1	1
E058_Foreskin_Keratinocyte_Primary_Cells_skin03_Epithelial_erc2-chromatin15state-all-files/E058_11_BivFlnk.bed	1	0.513	1	0.57	1	1	1	0.261	1	0.0175	1	0.000584	1	1	0.0539	1	0.712	1	0.661	1	0.00119	1	0.212	1	1	0.962	0.875	1	0.704	1	1	1	1	1	1	1	0.0543	0.532	1	0.611	1	0.00284	1	0.00947	0.69	1	1	1	0.694
E058_Foreskin_Keratinocyte_Primary_Cells_skin03_Epithelial_erc2-chromatin15state-all-files/E058_12_EnhBiv.bed	1	1	1	1	1	1	0.81	0.965	1	0.401	1	0.922	1	1	1	1	1	1	1	1	0.445	1	1	0.219	0.999	1	1	1	0.73	1	1	1	1	1	1	1	0.91	1	1	1	0.0305	1	1	1	0.359	1	0.867	1	0.797
E058_Foreskin_Keratinocyte_Primary_Cells_skin03_Epithelial_erc2-chromatin15state-all-files/E058_13_ReprPC.bed	1	0.718	1	0.47	1	1	1	1	1	0.575	1	0.802	1	0.961	0.771	1	0.14	1	1	1	1	1	1	1	0.817	1	1	1	1	1	1	1	1	0.129	1	0.364	0.388	0.471	1	1	0.00766	1	1	1	1	0.518	1	1	0.814
E058_Foreskin_Keratinocyte_Primary_Cells_skin03_Epithelial_erc2-chromatin15state-all-files/E058_14_ReprPCWk.bed	1	1	1	1	1	0.592	0.656	1	1	1	0.853	0.942	1	0.936	0.0116	0.504	0.806	1	1	0.106	1	1	1	1	1	1	1	1	0.712	1	0.415	0.00709	1	0.0428	1	0.24	0.746	0.367	0.0564	1	0.696	1	1	1	1	0.801	1	1	1
E058_Foreskin_Keratinocyte_Primary_Cells_skin03_Epithelial_erc2-chromatin15state-all-files/E058_15_Quies.bed	0.887	0.0641	1	1	1	1	1	1	1	1	1	1	0.926	1	1	1	1	1	1	1	1	1	1	1	1	1	0.501	1	1	0.864	1	1	1	1	1	1	1	1	1	1	1	1	1	1	1	1	1	1	1
E059_Foreskin_Melanocyte_Primary_Cells_skin01_Epithelial_erc2-chromatin15state-all-files/E059_1_TssA.bed	1	0.524	1	0.0687	1	1	1	0.0166	1	0.21	0.133	0.000785	1	1	0.4	1	0.115	1	1	0.791	0.029	1	0.89	1	0.434	1	0.977	1	0.922	1	0.0459	1	1	1	0.163	1	0.0357	0.0201	0.277	1	0.235	1	1	1	0.429	0.346	1	1	1
E059_Foreskin_Melanocyte_Primary_Cells_skin01_Epithelial_erc2-chromatin15state-all-files/E059_2_TssAFlnk.bed	1	1	0.0619	1	1	1	1	0.473	1	1	1	0.263	1	1	0.0401	0.0593	0.48	1	0.978	0.27	0.142	0.581	1	1	0.961	0.787	0.047	0.845	0.0602	1	0.104	1	0.913	1	0.935	1	0.0574	0.108	1	1	1	1	1	0.609	0.669	0.000539	1	1	0.624
E059_Foreskin_Melanocyte_Primary_Cells_skin01_Epithelial_erc2-chromatin15state-all-files/E059_3_TxFlnk.bed	1	1	0.596	1	1	1	1	0.24	1	1	1	0.000293	1	1	1	0.488	1	1	1	1	0.0664	0.00684	1	0.573	0.874	0.151	1	1	0.689	1	0.388	1	1	1	1	1	0.296	0.228	0.24	1	1	1	1	1	1	0.0341	1	1	0.76
E059_Foreskin_Melanocyte_Primary_Cells_skin01_Epithelial_erc2-chromatin15state-all-files/E059_4_Tx.bed	1	1	1	1	0.534	1	1	1	1	1	0.891	0.0707	1	1	0.109	1	1	1	1	1	0.719	1	0.703	1	1	1	1	0.038	0.431	1	0.0831	1	1	1	0.429	0.0755	0.077	0.58	0.473	1	1	1	1	1	0.577	0.622	1	1	0.736
E059_Foreskin_Melanocyte_Primary_Cells_skin01_Epithelial_erc2-chromatin15state-all-files/E059_5_TxWk.bed	0.456	1	1	0.756	1	1	1	8.72e-07	1	0.0468	0.867	0.0387	1	1	0.704	1	0.0815	1	1	1	0.0231	1	0.0613	1	1	0.0917	0.576	0.738	0.325	1	0.251	1	0.299	1	0.91	1	0.000949	0.998	0.855	1	1	1	1	1	0.0862	0.0687	1	1	0.496
E059_Foreskin_Melanocyte_Primary_Cells_skin01_Epithelial_erc2-chromatin15state-all-files/E059_6_EnhG.bed	1	1	1	1	1	1	1	0.00288	1	0.688	1	0.487	1	1	0.506	0.345	0.869	1	1	1	0.0693	1	0.405	0.57	0.831	0.274	1	0.757	0.184	1	1	1	0.513	1	0.317	1	0.984	0.163	1	1	1	1	1	1	0.0377	0.333	0.885	1	0.644
E059_Foreskin_Melanocyte_Primary_Cells_skin01_Epithelial_erc2-chromatin15state-all-files/E059_7_Enh.bed	1	1	1	0.284	1	1	1	0.0493	1	1	0.731	6.3e-09	1	1	0.872	1	0.637	1	1	0.925	0.0406	1	1	1	0.653	0.93	1	0.279	0.391	1	0.121	1	0.608	1	0.693	0.114	0.24	1	0.486	1	1	1	0.72	1	0.0168	0.0659	0.917	1	0.486
E059_Foreskin_Melanocyte_Primary_Cells_skin01_Epithelial_erc2-chromatin15state-all-files/E059_8_ZNF-Rpts.bed	1	1	1	1	1	1	1	1	1	1	1	1	1	1	1	1	1	1	1	1	0.271	1	1	1	1	1	1	1	0.893	1	0.273	1	1	1	1	1	1	0.429	1	1	1	1	1	1	1	1	1	1	1
E059_Foreskin_Melanocyte_Primary_Cells_skin01_Epithelial_erc2-chromatin15state-all-files/E059_9_Het.bed	1	1	1	1	1	1	1	1	1	1	1	1	1	1	0.743	1	1	1	1	1	1	1	1	1	1	1	1	1	1	1	1	1	1	1	1	0.114	1	0.752	0.0374	1	1	1	1	1	0.837	1	1	0.983	1
E059_Foreskin_Melanocyte_Primary_Cells_skin01_Epithelial_erc2-chromatin15state-all-files/E059_10_TssBiv.bed	1	0.287	1	0.418	1	1	1	1	1	0.451	1	0.0247	1	1	1	1	0.497	1	1	0.477	0.0116	1	1	0.506	1	1	1	1	1	1	1	1	1	1	1	1	0.329	1	1	1	1	1	1	0.147	1	0.614	1	1	1
E059_Foreskin_Melanocyte_Primary_Cells_skin01_Epithelial_erc2-chromatin15state-all-files/E059_11_BivFlnk.bed	1	1	1	1	1	1	1	0.688	1	0.296	1	0.0455	1	1	1	1	0.616	1	1	1	0.00119	1	0.343	1	1	0.893	1	0.888	1	1	0.698	1	0.895	1	0.398	1	0.943	0.352	1	1	1	0.104	1	0.212	0.171	1	1	1	1
E059_Foreskin_Melanocyte_Primary_Cells_skin01_Epithelial_erc2-chromatin15state-all-files/E059_12_EnhBiv.bed	0.653	0.71	1	0.476	1	1	1	0.587	1	0.296	1	0.723	1	1	1	1	0.661	1	0.984	1	0.0067	1	0.861	1	0.0209	1	0.81	1	0.424	1	1	1	1	1	1	1	0.105	0.493	1	0.868	0.24	1	1	1	1	0.707	1	1	0.023
E059_Foreskin_Melanocyte_Primary_Cells_skin01_Epithelial_erc2-chromatin15state-all-files/E059_13_ReprPC.bed	0.653	1	1	0.655	1	0.554	0.4	1	1	0.897	1	0.391	1	0.197	0.0206	1	0.814	1	1	1	1	1	1	1	0.82	1	1	1	0.603	1	1	1	1	0.0283	1	0.414	0.844	0.513	0.174	1	0.133	1	0.72	0.28	1	0.902	1	1	0.0188
E059_Foreskin_Melanocyte_Primary_Cells_skin01_Epithelial_erc2-chromatin15state-all-files/E059_14_ReprPCWk.bed	1	1	1	0.519	1	1	1	1	1	1	1	1	1	1	0.0532	1	0.958	0.258	1	1	1	1	1	1	1	1	1	1	1	0.065	1	0.957	1	1	1	0.379	1	0.841	0.634	1	0.131	1	1	1	1	1	1	0.942	1
E059_Foreskin_Melanocyte_Primary_Cells_skin01_Epithelial_erc2-chromatin15state-all-files/E059_15_Quies.bed	1	0.0358	1	1	1	1	1	1	1	0.0457	1	1	0.00641	1	1	1	1	1	1	1	1	1	1	1	1	1	0.239	1	1	1	1	1	1	1	1	1	1	1	1	0.807	1	1	1	1	1	1	1	1	1
E061_Foreskin_Melanocyte_Primary_Cells_skin03_Epithelial_erc2-chromatin15state-all-files/E061_1_TssA.bed	1	0.139	1	0.0674	1	1	0.872	0.45	1	0.152	0.613	0.0202	1	1	0.103	1	0.325	1	1	0.493	0.0995	1	0.561	1	0.774	1	0.464	1	0.714	1	0.141	1	1	1	0.203	1	0.00465	0.0221	0.56	1	0.182	1	1	1	0.429	0.596	1	1	0.895
E061_Foreskin_Melanocyte_Primary_Cells_skin03_Epithelial_erc2-chromatin15state-all-files/E061_2_TssAFlnk.bed	1	1	0.1	0.702	1	1	1	0.243	1	1	1	0.282	1	1	1	0.156	0.404	1	1	0.184	0.108	0.163	1	0.447	0.421	0.949	1	0.32	0.13	1	0.154	1	1	1	0.287	1	0.106	0.2	1	1	1	1	1	0.878	0.885	0.00442	0.526	1	1
E061_Foreskin_Melanocyte_Primary_Cells_skin03_Epithelial_erc2-chromatin15state-all-files/E061_3_TxFlnk.bed	1	1	1	1	1	1	1	0.00445	1	0.953	0.356	0.000785	1	1	1	1	0.637	1	0.495	1	0.445	1	0.861	1	1	0.329	1	1	1	1	0.121	1	1	1	1	1	0.536	1	0.474	0.596	1	1	1	1	0.642	0.0394	1	1	0.625
E061_Foreskin_Melanocyte_Primary_Cells_skin03_Epithelial_erc2-chromatin15state-all-files/E061_4_Tx.bed	1	1	1	1	1	1	1	0.00652	1	1	1	0.368	1	1	0.2	1	1	1	1	1	0.358	1	0.114	1	0.648	0.611	0.88	0.0647	0.34	1	0.212	1	0.49	1	0.639	1	0.0003	0.849	0.727	1	1	1	1	1	0.481	0.441	1	1	1
E061_Foreskin_Melanocyte_Primary_Cells_skin03_Epithelial_erc2-chromatin15state-all-files/E061_5_TxWk.bed	1	0.402	1	0.0613	0.951	1	1	0.000718	1	0.000694	0.699	0.027	1	1	1	1	0.00813	1	1	0.899	0.00606	1	0.413	1	1	0.363	1	1	0.729	1	0.786	1	0.174	1	1	1	0.00225	0.943	1	1	1	1	1	1	0.301	0.707	0.804	1	0.203
E061_Foreskin_Melanocyte_Primary_Cells_skin03_Epithelial_erc2-chromatin15state-all-files/E061_6_EnhG.bed	1	0.849	1	1	1	1	1	0.433	1	0.935	1	0.184	1	1	1	1	0.583	1	1	0.75	1	1	1	0.305	1	0.409	1	0.155	0.0763	1	0.406	1	1	1	0.559	0.726	1	0.671	1	1	1	1	1	1	0.21	0.189	1	1	1
E061_Foreskin_Melanocyte_Primary_Cells_skin03_Epithelial_erc2-chromatin15state-all-files/E061_7_Enh.bed	1	1	1	0.532	1	1	1	0.0199	1	1	1	1.93e-12	1	1	1	1	0.679	1	1	0.711	0.0317	1	1	1	0.316	0.641	1	1	0.493	1	0.241	1	0.667	1	1	1	0.592	1	1	1	1	1	1	1	0.0035	0.000946	0.756	1	0.6
E061_Foreskin_Melanocyte_Primary_Cells_skin03_Epithelial_erc2-chromatin15state-all-files/E061_8_ZNF-Rpts.bed	1	1	1	1	1	1	1	1	1	0.715	1	1	1	1	1	1	1	1	1	1	0.559	1	1	1	1	1	1	1	1	1	1	1	1	1	0.79	1	1	1	1	1	1	0.389	1	1	1	1	1	1	1
E061_Foreskin_Melanocyte_Primary_Cells_skin03_Epithelial_erc2-chromatin15state-all-files/E061_9_Het.bed	1	1	1	1	1	1	1	1	1	1	1	1	1	1	1	1	1	1	1	1	1	1	1	1	1	1	1	1	1	0.778	1	1	1	1	1	0.22	1	0.853	0.958	1	1	1	1	0.997	1	1	1	1	1
E061_Foreskin_Melanocyte_Primary_Cells_skin03_Epithelial_erc2-chromatin15state-all-files/E061_10_TssBiv.bed	0.726	1	1	1	1	1	1	0.0787	1	0.798	1	0.0182	1	1	1	1	1	1	1	1	0.185	1	1	1	1	1	1	1	1	1	0.529	1	1	1	1	1	1	0.641	1	1	1	1	1	1	1	1	1	1	1
E061_Foreskin_Melanocyte_Primary_Cells_skin03_Epithelial_erc2-chromatin15state-all-files/E061_11_BivFlnk.bed	1	0.444	1	0.107	1	0.411	1	1	1	0.000533	1	0.00471	1	1	1	1	0.0566	1	1	1	0.00261	1	0.393	0.57	1	0.928	0.0124	0.984	1	1	0.789	1	0.985	1	0.452	1	0.265	0.434	1	1	1	0.113	1	0.00947	0.621	1	0.78	1	1
E061_Foreskin_Melanocyte_Primary_Cells_skin03_Epithelial_erc2-chromatin15state-all-files/E061_12_EnhBiv.bed	0.419	1	1	0.225	1	1	1	0.373	1	1	0.591	0.435	1	1	1	1	0.156	1	0.281	1	0.000483	1	0.308	0.759	0.994	1	0.625	1	1	0.783	1	1	1	1	0.613	1	0.0435	0.761	1	0.209	0.284	1	1	1	0.8	1	1	1	0.0839
E061_Foreskin_Melanocyte_Primary_Cells_skin03_Epithelial_erc2-chromatin15state-all-files/E061_13_ReprPC.bed	1	1	1	0.409	1	1	0.834	1	1	0.612	1	0.673	1	1	1	0.607	0.46	1	1	0.315	0.945	1	0.703	1	0.566	1	0.851	1	1	1	1	1	1	0.171	1	0.924	0.807	0.496	0.925	1	0.111	1	0.72	1	1	0.227	1	1	0.433
E061_Foreskin_Melanocyte_Primary_Cells_skin03_Epithelial_erc2-chromatin15state-all-files/E061_14_ReprPCWk.bed	1	1	1	1	1	1	0.657	1	1	1	1	1	1	1	0.0582	1	0.46	1	1	0.925	1	1	1	1	1	1	1	1	1	0.0144	0.969	0.208	1	1	1	1	1	1	1	1	0.0811	1	1	0.754	1	1	1	0.864	1
E061_Foreskin_Melanocyte_Primary_Cells_skin03_Epithelial_erc2-chromatin15state-all-files/E061_15_Quies.bed	1	0.987	1	1	1	1	0.858	1	1	1	1	1	0.00646	0.247	1	1	1	1	1	1	1	1	1	1	0.957	0.993	1	1	1	1	1	1	1	1	1	1	1	1	1	1	1	1	1	1	1	1	1	1	1
E126_NHDF-Ad_Adult_Dermal_Fibroblast_Primary_Cells_Epithelial_erc2-chromatin15state-all-files/E126_1_TssA.bed	1	0.351	1	0.0719	1	1	1	0.0201	1	0.395	0.946	0.0188	1	1	0.185	1	0.0338	1	0.658	0.0918	0.000318	1	0.503	1	0.645	0.93	0.0986	1	0.658	1	0.0907	1	1	1	0.559	1	0.0471	0.00482	0.81	0.591	0.287	0.142	1	1	0.158	1	0.756	1	1
E126_NHDF-Ad_Adult_Dermal_Fibroblast_Primary_Cells_Epithelial_erc2-chromatin15state-all-files/E126_2_TssAFlnk.bed	1	1	1	1	1	1	1	0.441	1	0.775	1	0.232	1	1	1	1	0.604	1	1	0.515	0.12	1	1	1	0.467	1	1	0.775	0.449	1	0.578	1	1	1	0.774	1	0.0589	0.645	1	1	1	1	1	0.185	1	0.388	0.685	1	0.353
E126_NHDF-Ad_Adult_Dermal_Fibroblast_Primary_Cells_Epithelial_erc2-chromatin15state-all-files/E126_3_TxFlnk.bed	1	0.871	1	1	1	1	1	1	1	1	1	0.0114	1	1	1	1	0.639	1	0.47	1	0.808	1	1	0.47	0.819	0.772	1	1	1	1	1	1	0.726	1	0.494	1	0.0496	0.877	0.526	0.52	1	1	1	1	1	0.792	1	1	1
E126_NHDF-Ad_Adult_Dermal_Fibroblast_Primary_Cells_Epithelial_erc2-chromatin15state-all-files/E126_4_Tx.bed	1	1	1	1	1	1	1	0.519	1	1	1	1	1	1	1	1	0.718	1	1	1	1	1	0.17	1	1	1	1	0.43	1	1	1	1	0.585	1	0.582	1	0.0246	0.951	1	1	1	1	1	1	0.72	1	1	1	0.845
E126_NHDF-Ad_Adult_Dermal_Fibroblast_Primary_Cells_Epithelial_erc2-chromatin15state-all-files/E126_5_TxWk.bed	0.952	1	1	0.396	1	1	1	0.000296	1	0.0142	0.915	0.000739	1	1	0.246	1	0.000422	1	1	1	1.38e-05	1	0.636	1	1	0.147	0.38	0.0363	0.458	1	0.241	1	0.329	1	0.658	1	4.83e-11	1	1	1	0.769	1	1	1	0.0556	0.755	0.418	1	0.803
E126_NHDF-Ad_Adult_Dermal_Fibroblast_Primary_Cells_Epithelial_erc2-chromatin15state-all-files/E126_6_EnhG.bed	1	1	1	1	1	1	1	0.482	1	1	1	0.122	1	1	1	1	0.7	1	1	1	0.396	1	1	1	1	0.0783	1	1	0.497	1	0.0885	1	1	1	1	1	0.177	1	1	1	1	1	1	1	0.252	1	1	1	1
E126_NHDF-Ad_Adult_Dermal_Fibroblast_Primary_Cells_Epithelial_erc2-chromatin15state-all-files/E126_7_Enh.bed	1	1	1	0.768	1	1	1	0.0235	1	1	0.867	0.0479	1	1	1	1	0.671	1	0.975	1	0.000636	1	1	0.603	0.251	0.267	1	1	1	1	0.752	1	0.329	1	1	1	0.000954	0.721	0.251	0.393	1	1	1	1	0.0274	0.011	1	1	0.14
E126_NHDF-Ad_Adult_Dermal_Fibroblast_Primary_Cells_Epithelial_erc2-chromatin15state-all-files/E126_8_ZNF-Rpts.bed	1	1	1	0.522	1	1	1	1	1	0.943	1	1	1	1	1	1	0.727	1	0.464	1	0.378	1	1	1	0.831	1	1	1	1	1	0.82	1	1	1	1	1	0.982	0.94	1	1	1	1	1	1	1	1	1	1	1
E126_NHDF-Ad_Adult_Dermal_Fibroblast_Primary_Cells_Epithelial_erc2-chromatin15state-all-files/E126_9_Het.bed	1	1	1	1	1	1	1	1	1	1	1	1	1	1	1	1	1	1	1	1	1	1	1	1	1	1	1	1	1	1	1	1	1	1	1	1	1	1	0.483	1	1	1	1	1	1	1	1	1	1
E126_NHDF-Ad_Adult_Dermal_Fibroblast_Primary_Cells_Epithelial_erc2-chromatin15state-all-files/E126_10_TssBiv.bed	1	1	1	1	1	1	1	1	1	1	1	0.385	1	1	1	1	1	1	1	1	0.174	1	0.601	0.526	1	1	1	0.556	1	1	1	1	1	1	0.405	1	1	1	1	1	1	1	1	1	1	1	1	1	1
E126_NHDF-Ad_Adult_Dermal_Fibroblast_Primary_Cells_Epithelial_erc2-chromatin15state-all-files/E126_11_BivFlnk.bed	1	1	1	1	1	1	1	1	1	1	1	1	1	1	1	1	1	1	1	1	1	1	1	1	1	1	1	1	0.291	1	1	1	1	0.202	1	1	1	1	1	1	1	1	1	1	1	1	1	1	1
E126_NHDF-Ad_Adult_Dermal_Fibroblast_Primary_Cells_Epithelial_erc2-chromatin15state-all-files/E126_12_EnhBiv.bed	0.662	1	1	0.451	1	1	1	1	1	0.935	1	0.198	1	1	1	1	1	1	1	1	0.808	1	0.343	1	1	1	1	1	1	1	1	1	1	1	1	1	1	0.877	1	1	1	1	0.72	1	0.138	1	1	1	1
E126_NHDF-Ad_Adult_Dermal_Fibroblast_Primary_Cells_Epithelial_erc2-chromatin15state-all-files/E126_13_ReprPC.bed	1	0.78	1	0.46	1	1	0.303	1	1	0.155	0.838	0.227	1	0.819	0.966	1	1	1	1	0.00222	1	1	0.647	0.219	0.757	1	1	1	1	1	0.785	1	1	1	1	0.622	1	0.752	1	1	0.246	1	1	1	1	0.944	1	1	0.659
E126_NHDF-Ad_Adult_Dermal_Fibroblast_Primary_Cells_Epithelial_erc2-chromatin15state-all-files/E126_14_ReprPCWk.bed	0.158	1	1	0.227	0.315	0.202	0.753	1	0.161	1	0.199	0.587	1	1	0.0977	0.622	0.884	0.0894	1	1	1	0.824	1	1	0.0243	0.073	1	1	0.69	1	0.82	0.00412	1	0.633	0.316	0.677	1	0.791	0.44	1	0.0224	1	1	0.929	1	0.0784	1	1	0.0392
E126_NHDF-Ad_Adult_Dermal_Fibroblast_Primary_Cells_Epithelial_erc2-chromatin15state-all-files/E126_15_Quies.bed	1	0.0128	1	1	1	1	1	1	1	1	1	1	0.212	1	1	1	1	1	1	1	1	1	1	1	1	1	0.581	1	1	0.00148	1	1	1	1	1	1	1	1	1	1	1	1	1	1	1	1	1	0.0337	1
E127_NHEK-Epidermal_Keratinocyte_Primary_Cells_Epithelial_erc2-chromatin15state-all-files/E127_1_TssA.bed	1	0.434	1	0.0536	1	1	1	0.0369	1	0.0759	1	0.137	1	1	0.073	1	0.286	1	1	0.445	0.00363	1	0.343	1	0.656	0.81	0.0882	1	0.643	1	0.0182	1	1	1	0.161	1	0.12	0.00465	0.16	1	0.151	1	1	1	0.655	1	0.835	1	0.497
E127_NHEK-Epidermal_Keratinocyte_Primary_Cells_Epithelial_erc2-chromatin15state-all-files/E127_2_TssAFlnk.bed	1	1	1	1	1	1	1	0.673	1	0.977	0.134	0.0835	1	1	1	1	0.374	1	0.798	0.308	0.257	1	1	1	0.152	1	1	0.155	0.3	1	0.243	1	0.922	1	1	0.794	0.28	0.119	0.506	0.821	1	1	1	1	0.521	0.195	0.83	1	0.961
E127_NHEK-Epidermal_Keratinocyte_Primary_Cells_Epithelial_erc2-chromatin15state-all-files/E127_3_TxFlnk.bed	1	1	0.819	0.825	1	1	0.976	0.205	1	0.612	1	0.00893	1	1	1	0.775	0.207	1	1	1	0.843	0.824	0.66	1	0.72	1	1	1	1	1	1	1	1	1	0.708	1	0.193	1	0.68	1	1	1	1	1	0.457	1	1	1	0.884
E127_NHEK-Epidermal_Keratinocyte_Primary_Cells_Epithelial_erc2-chromatin15state-all-files/E127_4_Tx.bed	1	1	1	1	1	1	1	0.149	1	0.907	1	0.61	1	1	0.25	1	1	1	1	1	0.843	1	0.51	1	0.722	0.762	1	0.61	0.751	1	0.808	1	0.373	1	0.171	0.726	0.0651	0.532	1	1	1	1	1	1	0.658	1	1	1	0.572
E127_NHEK-Epidermal_Keratinocyte_Primary_Cells_Epithelial_erc2-chromatin15state-all-files/E127_5_TxWk.bed	1	1	1	0.301	1	1	1	2.07e-05	1	0.313	1	0.0493	1	1	1	1	0.517	1	1	1	0.019	1	0.261	1	1	0.352	0.111	0.0121	0.0145	1	0.323	1	0.617	1	0.708	1	5.45e-05	1	0.923	1	1	1	1	1	0.0137	0.365	0.492	1	1
E127_NHEK-Epidermal_Keratinocyte_Primary_Cells_Epithelial_erc2-chromatin15state-all-files/E127_6_EnhG.bed	1	0.943	1	1	1	1	1	0.11	1	0.971	1	0.235	1	1	0.966	0.533	0.46	1	1	1	0.395	0.956	0.618	1	0.551	0.243	1	1	1	1	0.241	1	0.151	1	1	1	0.377	0.764	1	1	1	1	1	1	0.129	1	1	1	0.403
E127_NHEK-Epidermal_Keratinocyte_Primary_Cells_Epithelial_erc2-chromatin15state-all-files/E127_7_Enh.bed	0.235	1	1	0.176	0.727	1	0.956	0.00349	1	1	1	0.0668	1	1	0.993	1	0.639	1	1	1	0.161	1	1	1	0.312	0.00667	1	1	1	1	0.515	1	1	1	1	1	0.129	0.943	1	1	1	1	1	1	0.0333	0.811	1	1	0.561
E127_NHEK-Epidermal_Keratinocyte_Primary_Cells_Epithelial_erc2-chromatin15state-all-files/E127_8_ZNF-Rpts.bed	1	1	1	1	1	1	1	1	1	0.727	1	0.807	1	1	1	0.63	1	1	1	1	1	1	1	1	0.937	1	1	1	1	1	1	1	1	1	1	1	1	1	1	1	1	1	1	1	1	1	1	1	1
E127_NHEK-Epidermal_Keratinocyte_Primary_Cells_Epithelial_erc2-chromatin15state-all-files/E127_9_Het.bed	1	1	1	1	1	1	1	1	1	1	1	1	1	1	1	1	1	1	1	1	1	1	0.956	1	1	1	1	1	1	1	1	1	1	1	1	0.425	1	0.922	1	1	1	1	1	1	1	1	1	1	1
E127_NHEK-Epidermal_Keratinocyte_Primary_Cells_Epithelial_erc2-chromatin15state-all-files/E127_10_TssBiv.bed	1	0.78	1	0.377	1	1	0.424	1	1	0.847	1	0.0218	1	1	1	1	0.528	1	1	1	1	1	1	0.494	1	0.232	1	1	1	1	0.578	1	1	1	1	1	0.29	0.266	1	1	1	0.0704	1	1	1	1	1	1	0.462
E127_NHEK-Epidermal_Keratinocyte_Primary_Cells_Epithelial_erc2-chromatin15state-all-files/E127_11_BivFlnk.bed	1	1	1	1	1	1	1	0.637	1	0.486	1	0.176	1	1	1	1	0.582	1	0.553	1	0.1	1	0.34	1	1	0.808	1	1	1	1	0.709	1	1	1	1	1	0.416	1	1	0.52	1	0.137	1	0.0103	0.572	1	1	1	1
E127_NHEK-Epidermal_Keratinocyte_Primary_Cells_Epithelial_erc2-chromatin15state-all-files/E127_12_EnhBiv.bed	1	1	1	1	1	1	1	1	1	0.692	0.984	0.269	1	1	1	1	1	1	1	1	0.201	1	0.922	1	1	1	1	1	0.592	1	0.381	1	0.904	1	1	1	1	0.323	1	1	0.0313	1	0.72	1	1	0.06	1	1	0.63
E127_NHEK-Epidermal_Keratinocyte_Primary_Cells_Epithelial_erc2-chromatin15state-all-files/E127_13_ReprPC.bed	1	1	1	0.28	1	1	0.541	1	1	0.835	1	0.313	1	1	1	1	0.0273	1	1	0.3	0.166	1	0.935	0.658	0.645	1	0.709	1	1	1	1	1	1	0.451	1	0.462	0.164	0.234	1	1	0.033	1	1	1	1	0.851	1	1	0.69
E127_NHEK-Epidermal_Keratinocyte_Primary_Cells_Epithelial_erc2-chromatin15state-all-files/E127_14_ReprPCWk.bed	0.149	1	1	1	1	1	1	1	1	1	0.287	0.676	1	1	0.00274	0.412	1	0.25	1	0.15	0.653	1	1	0.526	0.566	1	1	1	0.78	1	0.212	0.905	1	0.0397	1	0.152	1	0.65	0.0123	0.854	0.73	1	1	0.837	1	0.333	1	1	0.472
E127_NHEK-Epidermal_Keratinocyte_Primary_Cells_Epithelial_erc2-chromatin15state-all-files/E127_15_Quies.bed	1	0.0054	1	1	1	1	1	1	1	0.65	1	1	0.487	1	1	1	1	1	1	1	1	1	1	1	1	1	0.35	1	1	0.302	1	1	1	1	1	1	1	1	1	1	1	1	1	1	1	1	1	0.442	1
E001_ES-I3_ESC_erc2-chromatin15state-all-files/E001_1_TssA.bed	1	0.297	0.682	0.227	1	1	1	0.0202	1	0.135	1	0.0599	1	0.414	0.207	0.7	0.2	1	1	0.925	0.0841	1	0.437	1	0.407	0.443	0.0145	1	0.501	1	0.154	1	1	1	0.0571	1	0.0606	0.06	0.449	1	0.346	1	1	1	0.797	0.728	0.78	1	1
E001_ES-I3_ESC_erc2-chromatin15state-all-files/E001_2_TssAFlnk.bed	1	1	1	1	1	1	1	0.931	1	0.996	0.598	0.534	1	1	1	1	0.806	1	1	0.25	0.674	1	1	1	1	0.954	1	0.321	0.671	1	1	1	0.839	1	1	1	1	0.765	1	1	1	1	1	1	0.648	0.231	1	1	1
E001_ES-I3_ESC_erc2-chromatin15state-all-files/E001_3_TxFlnk.bed	1	1	1	1	1	1	1	1	1	1	1	0.0737	1	1	1	1	0.446	1	1	1	1	1	1	1	1	0.592	1	1	1	1	1	1	1	1	1	1	0.18	0.695	1	1	1	1	1	1	0.419	1	1	1	1
E001_ES-I3_ESC_erc2-chromatin15state-all-files/E001_4_Tx.bed	1	1	0.863	1	1	1	1	0.503	1	1	1	0.483	1	1	0.634	1	1	1	1	1	1	1	0.604	1	1	0.598	1	0.0125	0.924	1	0.659	1	0.562	1	0.202	1	0.182	0.742	1	1	1	1	1	1	0.0868	1	1	1	1
E001_ES-I3_ESC_erc2-chromatin15state-all-files/E001_5_TxWk.bed	1	1	1	0.339	1	1	1	5.65e-06	1	0.0866	0.796	0.0234	1	1	1	1	0.879	1	1	0.463	0.0061	1	0.0613	1	0.818	0.924	0.248	0.984	0.188	1	0.263	1	0.0912	1	1	1	0.000333	1	1	1	1	1	1	1	0.36	1	0.685	1	1
E001_ES-I3_ESC_erc2-chromatin15state-all-files/E001_6_EnhG.bed	1	1	1	1	1	1	1	1	1	1	1	0.33	1	1	1	1	0.366	1	1	1	1	1	1	1	1	1	1	1	1	1	1	1	0.935	1	0.598	1	1	1	0.597	1	1	1	1	1	1	1	1	1	0.775
E001_ES-I3_ESC_erc2-chromatin15state-all-files/E001_7_Enh.bed	1	1	1	0.293	1	1	1	0.000314	1	1	1	0.646	1	1	0.924	1	0.489	1	0.895	1	0.367	1	1	1	0.737	1	1	1	1	1	1	1	1	1	1	1	0.509	0.973	1	0.558	1	1	1	1	0.171	1	0.685	1	0.0861
E001_ES-I3_ESC_erc2-chromatin15state-all-files/E001_8_ZNF-Rpts.bed	1	1	1	1	1	1	1	1	1	1	1	0.971	1	1	1	1	1	1	1	1	0.466	1	1	1	1	1	1	1	1	1	1	1	1	0.711	1	1	1	1	1	1	1	1	1	1	0.806	1	1	1	1
E001_ES-I3_ESC_erc2-chromatin15state-all-files/E001_9_Het.bed	1	1	1	1	1	1	0.159	1	1	1	1	1	1	1	0.704	1	1	1	1	1	0.496	1	1	1	1	1	1	1	1	1	1	1	1	1	0.796	0.483	1	0.303	0.0805	1	1	1	1	1	1	1	1	1	1
E001_ES-I3_ESC_erc2-chromatin15state-all-files/E001_10_TssBiv.bed	0.906	0.33	0.913	0.172	1	1	1	0.894	1	0.134	0.986	0.00132	1	1	0.331	0.768	0.0898	1	1	1	4.92e-05	1	0.22	1	0.916	0.447	0.165	1	1	1	0.377	1	1	1	0.423	1	0.0194	0.0443	1	1	0.01	0.0153	1	0.0738	0.364	1	0.709	1	1
E001_ES-I3_ESC_erc2-chromatin15state-all-files/E001_11_BivFlnk.bed	0.718	1	1	0.491	1	1	1	1	1	0.445	1	1	1	1	1	1	0.141	1	1	1	1	1	1	1	1	1	1	1	0.598	1	1	1	1	1	1	1	0.924	0.846	1	1	1	1	1	0.256	1	0.707	1	1	0.557
E001_ES-I3_ESC_erc2-chromatin15state-all-files/E001_12_EnhBiv.bed	1	1	1	0.0562	0.365	1	0.159	0.607	1	0.641	0.842	0.0783	1	1	1	1	0.338	1	0.876	1	1	1	0.861	1	0.874	0.831	0.656	1	1	1	1	1	1	1	0.846	1	1	0.287	0.56	0.93	0.455	1	1	1	1	0.74	1	1	0.486
E001_ES-I3_ESC_erc2-chromatin15state-all-files/E001_13_ReprPC.bed	1	0.943	1	0.236	0.0194	1	1	1	1	0.979	1	0.108	1	1	0.566	1	0.155	1	0.876	0.925	0.196	1	0.912	0.475	1	0.92	1	1	0.133	1	1	1	0.637	0.752	1	1	0.0345	1	1	0.835	1	1	0.843	1	0.784	0.00548	1	1	0.0188
E001_ES-I3_ESC_erc2-chromatin15state-all-files/E001_14_ReprPCWk.bed	1	1	1	1	1	1	0.557	1	0.637	0.994	1	0.428	1	0.851	0.491	0.771	0.826	0.165	1	0.338	1	1	1	0.732	0.505	0.564	1	1	0.792	0.852	0.0812	1	1	0.278	0.609	0.175	1	0.867	1	1	0.566	1	1	1	0.585	1	0.526	1	0.787
E001_ES-I3_ESC_erc2-chromatin15state-all-files/E001_15_Quies.bed	0.68	0.988	1	1	1	1	1	1	1	1	1	1	0.128	1	1	1	1	1	1	1	1	1	1	1	1	1	1	1	1	1	1	1	1	1	1	1	1	1	1	1	1	1	1	1	1	1	1	1	1
E002_ES-WA7_ESC_erc2-chromatin15state-all-files/E002_1_TssA.bed	1	0.793	1	0.156	1	1	1	0.0357	1	0.35	1	0.00256	1	1	0.0974	1	0.022	1	1	0.764	0.0146	1	0.845	1	0.39	1	0.0458	1	0.612	1	0.134	1	1	1	0.0811	1	0.00465	0.00413	0.219	1	0.769	1	1	1	0.928	0.126	0.526	1	1
E002_ES-WA7_ESC_erc2-chromatin15state-all-files/E002_2_TssAFlnk.bed	1	1	1	1	1	1	1	0.247	1	1	1	0.268	1	1	1	1	1	1	1	1	1	1	1	1	1	1	1	0.37	1	1	1	1	1	1	1	0.976	0.432	1	1	1	1	1	1	1	1	1	1	1	1
E002_ES-WA7_ESC_erc2-chromatin15state-all-files/E002_3_TxFlnk.bed	1	1	1	1	1	1	1	1	1	1	1	1	1	1	1	1	1	1	1	1	1	1	1	1	1	1	1	1	1	1	1	1	1	1	1	1	1	1	1	1	1	1	1	1	1	1	1	1	1
E002_ES-WA7_ESC_erc2-chromatin15state-all-files/E002_4_Tx.bed	1	1	1	1	1	1	1	0.445	1	1	1	0.926	1	1	1	1	1	1	1	1	0.683	1	1	1	1	1	1	1	0.856	1	1	1	1	1	1	1	0.779	0.876	1	1	1	1	1	1	0.776	1	1	1	1
E002_ES-WA7_ESC_erc2-chromatin15state-all-files/E002_5_TxWk.bed	1	1	1	0.704	1	1	1	0.000259	1	1	1	0.152	1	1	0.539	1	0.711	1	1	1	0.0639	1	0.122	1	1	0.0329	1	0.148	0.671	1	0.589	1	1	1	0.171	1	0.0965	0.956	1	1	0.862	1	1	1	0.384	1	1	1	0.613
E002_ES-WA7_ESC_erc2-chromatin15state-all-files/E002_6_EnhG.bed	1	1	1	1	1	1	1	1	1	1	1	1	1	1	1	1	1	1	1	1	1	1	1	1	1	1	1	1	1	1	1	1	1	1	1	1	1	1	1	1	1	1	1	1	1	1	1	1	1
E002_ES-WA7_ESC_erc2-chromatin15state-all-files/E002_7_Enh.bed	0.618	1	1	0.116	1	1	1	0.266	0.537	0.611	0.812	0.262	1	1	0.108	1	0.466	1	1	1	0.351	1	1	1	1	1	1	0.552	0.814	1	0.829	1	1	1	1	1	0.554	0.996	0.16	1	1	1	1	1	0.797	0.742	0.69	1	0.474
E002_ES-WA7_ESC_erc2-chromatin15state-all-files/E002_8_ZNF-Rpts.bed	1	1	1	1	1	1	1	1	1	1	1	1	1	1	1	1	1	1	1	1	0.377	1	1	1	1	1	1	1	1	1	1	1	1	1	1	1	1	1	1	1	1	1	1	1	1	1	1	1	1
E002_ES-WA7_ESC_erc2-chromatin15state-all-files/E002_9_Het.bed	1	1	1	1	1	1	1	1	1	0.602	1	1	1	1	1	1	1	1	0.719	1	0.368	1	1	1	1	1	1	1	1	1	0.402	1	1	1	1	1	1	0.979	1	1	1	1	1	1	1	1	1	1	1
E002_ES-WA7_ESC_erc2-chromatin15state-all-files/E002_10_TssBiv.bed	1	1	1	0.669	1	1	1	0.364	1	0.836	1	0.812	1	1	1	1	0.854	1	1	1	0.674	1	0.561	0.716	0.957	0.589	1	1	1	1	0.484	1	1	1	1	1	0.457	0.673	1	1	1	0.22	1	0.381	0.0926	1	0.866	1	0.775
E002_ES-WA7_ESC_erc2-chromatin15state-all-files/E002_11_BivFlnk.bed	1	1	1	1	1	1	1	1	1	0.386	1	1	1	1	1	1	0.0198	1	1	1	1	1	1	1	1	1	1	1	1	1	1	1	1	1	1	1	1	1	1	1	1	1	1	1	1	1	1	1	1
E002_ES-WA7_ESC_erc2-chromatin15state-all-files/E002_12_EnhBiv.bed	1	0.654	1	0.263	1	1	1	0.884	1	0.0461	1	0.396	1	1	1	1	1	1	0.697	1	0.336	1	1	1	1	1	1	1	0.729	1	1	1	0.987	1	0.637	1	0.222	0.717	1	0.734	1	1	1	0.408	1	1	0.479	1	1
E002_ES-WA7_ESC_erc2-chromatin15state-all-files/E002_13_ReprPC.bed	0.375	0.969	1	0.00787	1	1	0.325	1	1	0.753	1	0.0326	1	1	1	1	0.145	1	0.47	0.324	0.00311	1	1	0.208	0.402	0.787	1	1	0.751	1	0.8	1	1	0.888	1	0.338	0.181	0.609	1	0.468	0.0224	1	1	1	1	1	0.971	1	0.203
E002_ES-WA7_ESC_erc2-chromatin15state-all-files/E002_14_ReprPCWk.bed	0.398	1	1	0.228	1	1	0.863	0.423	1	1	0.886	0.474	1	0.901	0.00596	0.593	0.465	0.0909	1	0.93	1	1	0.51	1	1	0.642	1	1	1	1	0.0758	0.0279	1	0.465	1	0.145	1	0.85	0.208	1	0.709	1	1	0.859	0.414	0.307	1	1	0.621
E002_ES-WA7_ESC_erc2-chromatin15state-all-files/E002_15_Quies.bed	1	0.961	1	1	1	1	1	1	1	0.907	1	1	0.339	1	1	1	1	1	1	1	1	0.735	1	1	1	1	1	1	1	1	1	1	1	1	1	1	1	1	1	1	1	1	1	1	1	1	1	1	1
E003_H1_ESC_erc2-chromatin15state-all-files/E003_1_TssA.bed	1	0.139	1	0.11	1	1	0.956	0.421	1	0.00961	1	0.0935	1	0.844	0.154	1	0.713	1	1	0.157	0.147	1	0.351	1	0.915	1	0.134	1	0.347	1	0.39	1	1	1	0.146	1	0.249	0.0325	0.261	1	0.212	1	1	1	0.842	0.74	0.452	1	1
E003_H1_ESC_erc2-chromatin15state-all-files/E003_2_TssAFlnk.bed	1	0.845	0.292	1	1	1	1	0.0238	1	1	0.842	0.299	1	1	0.336	0.156	1	1	1	0.44	0.149	0.056	1	1	0.0698	1	1	0.608	0.972	1	0.781	1	1	1	0.768	1	0.3	0.632	1	1	1	1	1	1	1	1	1	1	1
E003_H1_ESC_erc2-chromatin15state-all-files/E003_3_TxFlnk.bed	1	1	1	1	1	1	1	1	1	1	1	0.4	1	1	1	1	0.46	1	1	1	1	1	1	1	1	1	1	1	1	1	1	1	1	1	1	1	0.655	1	1	1	1	1	1	1	1	1	1	1	1
E003_H1_ESC_erc2-chromatin15state-all-files/E003_4_Tx.bed	1	1	0.913	1	1	1	1	0.882	1	0.979	1	0.321	1	1	0.243	1	0.794	1	1	1	1	0.968	0.351	1	1	0.54	0.646	0.0363	0.509	1	0.886	1	0.424	1	0.267	1	0.0708	0.229	1	1	1	1	1	1	0.454	1	1	1	0.895
E003_H1_ESC_erc2-chromatin15state-all-files/E003_5_TxWk.bed	1	1	1	1	1	1	1	2.07e-06	1	0.0118	1	0.0182	1	1	0.96	1	0.552	1	1	1	0.00959	1	0.0844	1	0.767	0.646	0.881	0.984	0.438	1	0.863	1	0.62	1	1	1	0.000607	0.998	1	1	1	1	1	1	0.289	1	1	1	1
E003_H1_ESC_erc2-chromatin15state-all-files/E003_6_EnhG.bed	1	1	1	1	1	1	1	0.393	1	1	1	0.413	1	1	1	1	1	1	0.661	0.94	1	1	0.59	1	1	0.0932	1	0.984	0.802	1	0.121	1	1	1	0.641	1	0.131	0.0995	1	0.697	1	1	1	1	0.824	1	1	1	0.818
E003_H1_ESC_erc2-chromatin15state-all-files/E003_7_Enh.bed	1	1	1	0.205	1	1	1	0.000718	1	0.847	1	0.0621	1	1	0.614	0.907	1	1	1	1	0.286	1	0.716	1	1	1	1	1	0.262	1	1	1	1	1	1	1	0.924	1	0.15	1	1	1	1	1	0.136	0.479	0.604	1	0.277
E003_H1_ESC_erc2-chromatin15state-all-files/E003_8_ZNF-Rpts.bed	1	1	1	1	1	1	0.555	1	1	1	1	1	1	1	1	1	1	1	1	1	0.566	1	1	1	0.781	1	1	1	1	1	1	1	1	0.804	1	1	1	1	1	1	1	1	1	1	1	1	1	1	1
E003_H1_ESC_erc2-chromatin15state-all-files/E003_9_Het.bed	1	1	1	1	1	1	1	1	1	1	1	1	1	1	1	1	1	1	1	1	1	1	1	1	0.817	1	1	1	1	4.75e-14	1	1	0.832	1	0.653	1	1	0.925	0.135	1	1	1	1	1	1	1	1	9.97e-09	1
E003_H1_ESC_erc2-chromatin15state-all-files/E003_10_TssBiv.bed	1	0.264	1	0.781	1	1	1	1	1	0.89	1	0.00455	1	1	1	1	0.134	1	1	0.929	0.000405	1	0.571	0.766	0.981	0.67	0.00239	1	0.773	1	0.0896	1	1	1	0.622	1	0.133	0.161	1	1	0.0268	0.229	1	1	0.342	1	1	1	1
E003_H1_ESC_erc2-chromatin15state-all-files/E003_11_BivFlnk.bed	1	1	0.722	1	1	1	1	1	1	0.182	1	0.905	1	1	1	0.63	0.0049	1	0.799	1	0.00296	1	1	1	1	0.67	1	1	0.856	1	1	1	1	1	0.637	1	0.077	0.211	1	0.742	1	1	1	0.00254	0.897	1	1	1	0.39
E003_H1_ESC_erc2-chromatin15state-all-files/E003_12_EnhBiv.bed	0.783	1	1	0.312	1	1	0.219	1	1	0.739	0.67	0.186	1	1	1	1	0.00621	1	1	1	0.784	1	0.742	0.487	1	0.224	1	1	1	1	1	1	1	1	0.447	1	0.323	0.338	1	1	0.111	1	1	0.692	1	0.936	1	1	1
E003_H1_ESC_erc2-chromatin15state-all-files/E003_13_ReprPC.bed	1	1	1	0.00353	1	1	1	1	1	0.856	1	0.109	1	1	1	1	0.507	1	0.439	0.435	0.0378	1	0.415	1	0.472	1	1	0.908	0.358	1	0.863	1	1	0.687	1	0.815	0.309	1	1	0.405	1	1	0.949	1	1	0.00769	1	1	0.116
E003_H1_ESC_erc2-chromatin15state-all-files/E003_14_ReprPCWk.bed	0.683	1	1	1	0.581	1	0.889	0.482	1	0.917	1	0.569	1	1	0.187	0.937	0.76	1	1	0.711	0.934	1	1	0.196	0.813	1	1	1	0.757	1	0.533	0.952	1	0.962	1	0.342	1	0.884	1	1	0.199	1	1	1	0.175	0.542	0.984	1	0.502
E003_H1_ESC_erc2-chromatin15state-all-files/E003_15_Quies.bed	1	1	1	1	1	1	1	1	1	1	1	1	0.156	1	1	1	1	1	1	1	1	1	1	1	1	1	1	1	1	1	1	1	1	1	1	1	1	1	1	1	1	1	1	1	1	1	1	1	1
E008_H9_ESC_erc2-chromatin15state-all-files/E008_1_TssA.bed	1	0.199	1	0.114	1	1	0.999	0.0829	1	0.0903	1	0.00221	1	0.876	0.0974	1	0.308	1	1	0.502	0.00108	1	0.604	1	0.542	1	0.00831	0.657	0.314	1	0.333	1	1	1	0.00605	1	0.00506	0.0054	0.506	1	0.194	1	1	1	0.532	0.414	0.604	1	1
E008_H9_ESC_erc2-chromatin15state-all-files/E008_2_TssAFlnk.bed	1	1	0.14	1	1	1	1	0.809	1	0.631	0.954	1	1	1	1	0.0921	0.73	1	1	0.188	0.945	1	1	1	0.466	0.119	1	1	0.714	1	1	1	1	1	1	1	1	1	1	1	1	1	1	1	1	1	0.78	1	1
E008_H9_ESC_erc2-chromatin15state-all-files/E008_3_TxFlnk.bed	1	1	0.535	1	1	1	1	1	1	1	1	0.0493	1	1	1	0.415	0.363	1	1	1	0.455	0.473	1	1	1	1	1	1	1	1	1	1	1	1	0.322	1	0.516	0.609	1	1	1	1	1	1	1	1	1	1	0.382
E008_H9_ESC_erc2-chromatin15state-all-files/E008_4_Tx.bed	1	1	0.671	1	1	1	1	0.535	1	1	1	0.304	1	1	0.148	1	1	0.789	1	1	0.984	0.823	0.248	1	1	1	1	0.17	0.776	1	0.645	1	0.424	1	0.0877	0.511	0.077	0.0757	1	1	1	1	1	1	0.172	0.67	1	1	0.758
E008_H9_ESC_erc2-chromatin15state-all-files/E008_5_TxWk.bed	1	1	1	1	0.494	1	1	3.63e-08	1	0.00831	0.812	0.00951	1	1	1	1	0.97	1	1	0.711	0.00591	1	0.145	1	0.453	0.93	1	0.427	0.122	1	0.375	1	0.193	1	1	1	0.0166	0.995	1	1	1	1	1	1	0.0428	0.801	0.856	1	1
E008_H9_ESC_erc2-chromatin15state-all-files/E008_6_EnhG.bed	1	1	1	1	1	1	1	1	1	1	1	0.602	1	1	1	1	1	1	1	1	1	1	1	1	1	0.792	1	1	1	1	1	1	1	1	1	1	1	1	1	1	1	1	1	1	1	1	1	1	1
E008_H9_ESC_erc2-chromatin15state-all-files/E008_7_Enh.bed	1	1	1	0.292	1	1	1	0.353	1	1	1	0.366	1	1	0.132	1	1	1	1	1	1	1	1	1	0.978	1	1	1	1	1	1	1	1	1	1	1	1	1	1	1	1	1	1	1	1	0.671	0.843	1	0.496
E008_H9_ESC_erc2-chromatin15state-all-files/E008_8_ZNF-Rpts.bed	1	1	1	1	1	1	1	1	1	1	1	1	1	1	1	1	1	1	1	0.929	0.44	1	1	1	1	1	1	1	1	1	1	1	1	1	1	1	1	1	0.152	1	0.456	1	1	1	1	1	1	1	0.884
E008_H9_ESC_erc2-chromatin15state-all-files/E008_9_Het.bed	1	1	1	1	1	1	1	1	1	1	1	1	1	1	1	1	1	1	1	1	1	1	1	1	1	1	1	1	1	0.467	1	1	0.978	1	1	0.976	1	1	0.000864	1	0.791	1	1	1	1	1	1	1	1
E008_H9_ESC_erc2-chromatin15state-all-files/E008_10_TssBiv.bed	1	1	1	0.704	1	1	1	0.419	1	0.0635	1	0.05	1	1	1	1	0.0474	1	0.814	1	0.000413	1	0.127	0.744	0.975	0.303	0.246	1	0.779	1	0.569	1	1	1	1	1	0.132	0.0218	1	0.715	0.0224	0.142	1	0.0248	0.122	1	1	1	0.799
E008_H9_ESC_erc2-chromatin15state-all-files/E008_11_BivFlnk.bed	1	1	1	1	1	1	1	1	1	1	1	1	1	1	1	1	1	1	1	1	1	1	1	1	1	0.385	1	1	1	1	0.361	1	1	1	1	1	1	1	1	1	1	1	1	1	1	1	1	1	1
E008_H9_ESC_erc2-chromatin15state-all-files/E008_12_EnhBiv.bed	1	1	1	1	1	1	1	1	1	0.439	0.838	1	1	1	1	1	0.144	1	1	1	0.766	1	1	1	1	0.709	1	1	1	1	1	1	1	1	1	1	0.867	1	1	1	1	1	1	0.266	1	1	1	1	0.535
E008_H9_ESC_erc2-chromatin15state-all-files/E008_13_ReprPC.bed	0.874	0.358	1	0.00177	0.752	1	1	1	1	1	1	0.553	1	1	1	1	0.00242	1	0.163	0.324	0.0614	1	0.909	0.435	0.715	1	0.993	1	1	1	1	1	1	1	1	1	0.00408	1	1	0.178	0.868	1	1	0.927	1	0.738	1	1	0.474
E008_H9_ESC_erc2-chromatin15state-all-files/E008_14_ReprPCWk.bed	0.646	1	1	0.196	1	0.382	0.386	0.587	1	0.143	1	0.208	1	0.468	0.0743	1	0.261	1	1	1	0.71	1	0.739	0.452	1	1	1	1	0.431	0.464	0.799	1	1	1	1	0.584	1	0.752	1	1	1	1	1	0.715	0.814	0.779	1	1	0.486
E008_H9_ESC_erc2-chromatin15state-all-files/E008_15_Quies.bed	0.952	0.673	1	1	1	1	1	1	1	1	1	1	0.293	1	1	1	1	1	1	1	1	1	1	1	1	0.901	1	1	1	1	1	1	1	1	1	1	1	1	1	1	1	1	1	1	1	1	1	1	1
E014_HUES48_ESC_erc2-chromatin15state-all-files/E014_1_TssA.bed	1	0.176	0.59	0.134	1	1	0.95	0.0115	1	0.00859	1	0.0645	1	1	0.126	0.57	0.51	1	1	0.711	0.0378	1	0.402	1	0.742	1	0.0605	1	0.359	1	0.43	1	1	1	0.146	1	0.0389	0.0105	0.59	1	0.214	1	1	1	0.584	0.742	0.479	1	1
E014_HUES48_ESC_erc2-chromatin15state-all-files/E014_2_TssAFlnk.bed	1	0.924	1	1	1	1	1	1	1	1	1	0.526	1	1	1	1	1	1	1	0.132	0.411	1	1	1	0.391	1	1	0.0751	1	1	0.895	1	1	1	1	1	0.321	1	0.664	1	1	1	1	1	1	1	1	1	1
E014_HUES48_ESC_erc2-chromatin15state-all-files/E014_3_TxFlnk.bed	1	0.85	0.65	1	1	1	1	0.199	1	0.443	1	0.62	1	1	1	0.632	0.625	1	1	1	0.812	0.581	0.783	1	1	0.276	1	1	1	1	1	1	1	1	1	1	0.437	0.493	1	1	1	1	1	1	0.641	1	1	1	1
E014_HUES48_ESC_erc2-chromatin15state-all-files/E014_4_Tx.bed	1	1	1	1	1	1	1	0.524	1	0.905	1	0.342	1	1	0.186	1	1	1	1	1	0.918	1	0.132	1	1	0.901	1	0.0162	0.903	1	0.785	1	0.305	1	0.212	1	0.0071	0.254	1	1	1	1	1	1	0.234	1	1	1	0.83
E014_HUES48_ESC_erc2-chromatin15state-all-files/E014_5_TxWk.bed	1	0.654	1	1	1	1	1	8.72e-07	1	0.00597	0.812	0.0631	1	1	1	1	0.658	1	1	0.807	0.00969	1	0.22	1	1	0.478	0.874	1	0.229	1	0.248	1	0.216	1	0.637	1	0.00267	1	1	1	1	1	1	1	0.0796	0.406	1	1	1
E014_HUES48_ESC_erc2-chromatin15state-all-files/E014_6_EnhG.bed	1	1	1	0.857	1	1	1	1	1	1	1	0.0389	1	1	1	1	0.981	1	0.648	1	0.843	1	1	1	1	0.645	1	1	1	1	0.771	1	1	1	1	1	0.649	1	1	0.731	1	1	1	1	1	1	1	1	0.892
E014_HUES48_ESC_erc2-chromatin15state-all-files/E014_7_Enh.bed	1	1	1	0.0315	1	1	1	0.261	1	0.601	1	0.155	1	1	1	1	1	1	1	1	0.777	1	1	1	1	1	1	1	1	1	1	1	1	1	1	1	1	1	1	1	1	1	1	1	0.936	0.728	0.24	1	0.324
E014_HUES48_ESC_erc2-chromatin15state-all-files/E014_8_ZNF-Rpts.bed	1	1	1	1	1	1	1	1	1	1	1	1	1	1	1	1	1	1	1	1	0.933	1	1	1	0.786	1	1	1	1	1	1	1	1	0.858	1	1	1	0.842	0.0839	1	1	1	1	1	1	1	1	1	1
E014_HUES48_ESC_erc2-chromatin15state-all-files/E014_9_Het.bed	1	1	1	1	1	1	1	1	1	1	1	1	1	1	1	1	1	1	1	1	1	1	1	1	1	1	1	1	1	0.000142	1	1	1	1	1	1	1	1	0.00644	1	1	1	1	1	1	1	1	0.0116	1
E014_HUES48_ESC_erc2-chromatin15state-all-files/E014_10_TssBiv.bed	1	0.456	1	0.949	1	1	1	0.679	1	1	0.857	0.00221	1	1	1	1	0.0365	1	0.876	1	0.000483	1	0.45	1	0.753	0.895	0.142	1	0.922	1	0.435	1	1	1	0.316	1	0.614	0.382	1	0.781	0.0421	0.24	1	0.0469	0.225	1	1	1	0.968
E014_HUES48_ESC_erc2-chromatin15state-all-files/E014_11_BivFlnk.bed	1	1	1	0.224	1	1	1	1	1	0.226	1	1	1	1	1	1	0.00998	1	1	1	0.0477	1	0.562	1	0.981	1	0.996	0.987	1	1	0.569	1	1	1	1	1	0.11	0.422	1	1	1	1	1	1	1	0.982	0.87	1	1
E014_HUES48_ESC_erc2-chromatin15state-all-files/E014_12_EnhBiv.bed	1	1	1	1	0.592	1	1	1	1	0.897	1	0.0387	1	1	0.114	1	0.145	1	1	1	0.769	1	1	1	0.592	0.196	1	1	1	1	1	1	1	1	1	0.878	0.439	0.391	1	1	1	1	1	0.715	1	0.424	1	1	1
E014_HUES48_ESC_erc2-chromatin15state-all-files/E014_13_ReprPC.bed	1	0.851	1	0.0169	1	1	0.673	1	1	0.126	1	0.0682	1	0.851	1	1	0.385	1	0.21	1	0.0612	1	1	0.202	0.724	1	1	1	0.202	1	1	1	1	1	1	0.653	0.169	0.999	1	0.192	0.745	1	1	0.478	1	0.0251	1	1	0.104
E014_HUES48_ESC_erc2-chromatin15state-all-files/E014_14_ReprPCWk.bed	1	1	1	0.673	0.126	0.877	0.788	0.34	1	1	1	0.928	1	1	0.073	1	1	0.164	1	0.495	1	1	1	0.573	0.817	0.742	1	1	0.788	1	0.569	1	1	0.962	0.423	1	1	0.718	1	1	0.287	1	1	1	0.707	0.609	1	1	0.527
E014_HUES48_ESC_erc2-chromatin15state-all-files/E014_15_Quies.bed	0.58	1	1	1	1	1	1	1	1	1	1	1	0.156	1	1	1	1	1	1	1	1	1	1	1	1	1	1	1	1	1	1	1	1	1	1	1	1	1	1	1	1	1	1	1	1	1	1	1	1
E015_HUES6_ESC_erc2-chromatin15state-all-files/E015_1_TssA.bed	1	0.292	1	0.132	1	1	1	0.291	1	0.00429	0.885	0.0226	1	0.851	0.166	1	0.777	1	1	0.372	0.076	1	0.291	1	0.767	1	0.116	1	0.622	1	0.304	1	1	1	0.0453	1	0.0248	0.0918	0.361	1	0.284	1	1	1	1	0.578	0.992	1	1
E015_HUES6_ESC_erc2-chromatin15state-all-files/E015_2_TssAFlnk.bed	1	0.733	1	0.806	0.795	1	1	0.116	1	1	1	1	1	1	1	1	0.713	1	1	0.389	0.556	0.824	1	1	0.466	0.924	1	0.566	0.469	1	0.0928	1	1	1	0.609	1	0.855	0.836	0.397	1	0.761	1	1	1	0.279	0.724	0.604	1	0.816
E015_HUES6_ESC_erc2-chromatin15state-all-files/E015_3_TxFlnk.bed	1	1	0.711	1	1	1	1	0.851	1	1	1	0.0826	1	1	1	0.63	0.248	1	1	1	0.933	0.627	0.386	1	0.915	0.389	1	0.882	1	1	0.881	1	1	1	0.609	1	0.0129	0.605	1	1	1	1	1	1	0.743	1	1	1	0.682
E015_HUES6_ESC_erc2-chromatin15state-all-files/E015_4_Tx.bed	1	1	1	1	1	1	1	0.414	1	1	1	0.812	1	1	0.137	1	1	1	1	1	1	1	0.086	1	0.907	0.316	1	0.0363	0.814	1	0.25	1	0.346	1	0.329	1	0.00656	0.215	1	1	1	1	1	1	0.203	0.96	0.992	1	1
E015_HUES6_ESC_erc2-chromatin15state-all-files/E015_5_TxWk.bed	1	1	1	0.778	0.934	1	1	1e-05	1	0.0417	0.348	0.00471	1	1	1	1	0.183	1	1	0.493	0.0109	1	0.793	1	0.957	0.93	0.785	0.627	0.0731	1	0.471	1	0.0905	1	1	1	0.0209	0.961	1	1	1	1	1	1	0.0267	0.923	1	1	1
E015_HUES6_ESC_erc2-chromatin15state-all-files/E015_6_EnhG.bed	1	1	1	1	1	1	1	0.0486	1	1	1	0.45	1	1	0.525	1	1	1	0.876	1	1	1	1	1	1	0.93	1	1	1	1	1	1	1	1	0.871	1	0.458	1	0.891	0.902	1	1	1	1	1	1	1	1	0.562
E015_HUES6_ESC_erc2-chromatin15state-all-files/E015_7_Enh.bed	1	1	1	0.741	1	1	1	0.000579	1	0.758	1	0.258	1	1	1	1	1	1	1	1	0.199	1	1	1	0.957	0.433	1	1	1	1	0.978	1	1	1	1	1	0.257	0.889	0.26	1	1	1	1	1	0.373	0.296	0.297	1	0.603
E015_HUES6_ESC_erc2-chromatin15state-all-files/E015_8_ZNF-Rpts.bed	1	1	1	1	1	1	1	1	1	1	1	0.955	1	1	1	1	0.907	1	0.918	1	0.74	1	1	1	1	1	1	1	1	1	1	1	1	1	0.998	1	1	1	0.781	1	1	1	1	1	1	0.977	1	1	1
E015_HUES6_ESC_erc2-chromatin15state-all-files/E015_9_Het.bed	1	1	1	1	1	1	0.219	1	1	1	1	1	1	1	0.879	1	1	1	1	1	1	1	1	1	1	1	1	1	0.986	0.0658	1	1	1	1	1	0.152	1	0.989	0.0204	1	0.788	1	1	1	1	1	1	1	1
E015_HUES6_ESC_erc2-chromatin15state-all-files/E015_10_TssBiv.bed	1	0.105	1	0.396	1	1	1	0.372	1	0.226	1	0.004	1	1	1	1	0.00596	1	1	1	3.29e-06	1	0.533	0.309	1	0.93	0.00701	1	0.996	1	0.136	1	1	1	0.853	1	0.0373	0.0208	1	1	0.364	0.25	1	0.0626	0.262	1	1	1	0.558
E015_HUES6_ESC_erc2-chromatin15state-all-files/E015_11_BivFlnk.bed	0.489	1	0.69	0.102	1	1	1	1	1	0.253	1	0.251	1	1	0.272	0.684	0.0273	1	0.314	1	0.145	1	0.209	1	0.182	0.186	1	1	1	1	1	1	1	1	1	1	0.769	0.16	1	0.294	0.348	0.24	1	0.439	1	0.578	1	1	0.908
E015_HUES6_ESC_erc2-chromatin15state-all-files/E015_12_EnhBiv.bed	1	1	1	1	1	1	0.509	1	1	1	1	0.142	1	1	0.437	1	1	1	1	1	1	1	0.956	1	1	1	1	1	0.518	1	1	1	0.291	1	0.882	1	0.319	0.921	1	1	0.0958	1	1	1	1	0.508	0.709	1	0.522
E015_HUES6_ESC_erc2-chromatin15state-all-files/E015_13_ReprPC.bed	1	1	1	0.0365	1	1	0.423	1	1	0.312	1	0.529	1	1	1	1	1	1	0.352	0.333	0.536	1	0.906	0.672	1	1	1	1	0.248	0.288	0.895	1	1	0.147	1	0.196	0.752	1	1	0.349	0.908	1	1	0.712	1	0.822	1	1	0.149
E015_HUES6_ESC_erc2-chromatin15state-all-files/E015_14_ReprPCWk.bed	0.341	1	1	1	1	1	1	0.959	1	1	1	0.859	1	0.605	0.246	0.769	1	0.25	1	1	1	1	1	1	0.999	1	1	1	1	0.524	0.861	0.367	1	1	0.441	0.354	1	1	0.639	1	1	1	1	1	0.464	1	1	0.004	1
E015_HUES6_ESC_erc2-chromatin15state-all-files/E015_15_Quies.bed	1	0.301	1	1	1	1	1	1	1	1	1	1	0.0457	1	1	1	1	1	1	1	1	1	1	1	1	1	1	1	1	1	1	1	1	1	1	1	1	1	1	1	1	1	1	1	1	1	1	1	1
E016_HUES64_ESC_erc2-chromatin15state-all-files/E016_1_TssA.bed	1	0.524	0.59	0.134	1	1	0.535	0.0764	1	0.076	0.889	0.207	1	1	0.115	0.57	0.777	1	1	0.362	0.216	1	0.413	1	0.55	1	0.495	1	0.617	1	0.199	1	1	1	0.492	1	0.0289	0.0221	0.6	1	0.208	1	1	1	0.218	1	0.709	1	1
E016_HUES64_ESC_erc2-chromatin15state-all-files/E016_2_TssAFlnk.bed	1	0.695	1	1	1	1	1	0.995	1	0.977	1	0.0824	1	1	1	1	0.769	1	1	1	0.396	1	1	1	0.981	0.634	1	0.055	0.66	1	0.738	1	1	1	1	1	1	0.958	1	1	1	1	1	1	1	0.0715	1	1	1
E016_HUES64_ESC_erc2-chromatin15state-all-files/E016_3_TxFlnk.bed	1	1	0.657	1	1	1	1	0.244	1	0.506	1	0.075	1	1	1	0.645	0.231	1	1	1	0.883	0.603	0.823	1	1	0.327	1	1	1	1	1	1	1	1	0.607	1	0.555	0.924	1	1	1	1	1	1	0.685	1	1	1	1
E016_HUES64_ESC_erc2-chromatin15state-all-files/E016_4_Tx.bed	1	1	1	1	1	1	1	0.692	1	0.733	1	0.608	1	1	0.108	1	1	1	1	1	1	1	0.086	1	0.975	0.535	1	0.0392	0.959	1	0.547	1	0.45	1	0.452	1	0.00225	0.341	1	1	1	1	1	1	0.373	1	1	1	1
E016_HUES64_ESC_erc2-chromatin15state-all-files/E016_5_TxWk.bed	1	1	1	0.834	1	1	1	1.01e-07	1	0.0277	0.118	0.00832	1	1	1	1	0.363	1	1	0.999	0.00927	1	0.209	1	1	0.893	0.992	1	0.0752	1	0.443	1	0.225	1	1	1	0.0399	1	1	1	1	1	1	1	0.0246	0.479	1	1	1
E016_HUES64_ESC_erc2-chromatin15state-all-files/E016_6_EnhG.bed	1	1	1	1	1	1	1	1	1	1	1	0.294	1	1	0.687	1	0.97	1	1	1	0.843	1	1	1	1	1	1	1	1	1	1	1	1	1	1	1	0.371	1	0.991	1	1	1	1	1	1	1	1	1	0.895
E016_HUES64_ESC_erc2-chromatin15state-all-files/E016_7_Enh.bed	0.943	0.856	1	0.252	1	1	1	0.0639	1	0.124	1	0.184	1	1	1	0.872	1	1	1	1	0.531	1	1	1	0.966	0.484	1	1	0.931	1	1	1	1	1	1	1	0.992	0.929	1	1	1	1	1	1	0.897	0.804	0.765	1	1
E016_HUES64_ESC_erc2-chromatin15state-all-files/E016_8_ZNF-Rpts.bed	1	1	1	1	1	1	1	1	1	1	1	1	1	1	1	1	1	1	1	1	0.497	1	1	1	0.911	1	1	1	1	1	1	1	1	0.991	0.916	1	1	1	0.442	1	1	1	1	1	1	0.804	1	1	1
E016_HUES64_ESC_erc2-chromatin15state-all-files/E016_9_Het.bed	1	1	1	1	1	1	0.409	1	1	0.736	1	1	1	1	1	1	1	1	1	1	1	1	1	1	1	1	1	1	1	4.75e-07	1	1	1	1	0.879	0.915	1	0.921	0.309	1	1	1	1	1	1	1	1	9.76e-05	1
E016_HUES64_ESC_erc2-chromatin15state-all-files/E016_10_TssBiv.bed	1	0.163	0.942	0.466	1	1	1	0.463	1	0.0485	1	0.00616	1	1	1	0.758	0.0796	1	1	1	1.42e-05	1	0.581	1	1	1	0.00701	1	1	1	0.636	1	1	1	0.157	1	6.06e-05	0.0768	1	0.902	0.348	0.0145	1	0.0766	0.339	1	1	1	1
E016_HUES64_ESC_erc2-chromatin15state-all-files/E016_11_BivFlnk.bed	1	1	1	1	1	1	1	1	1	1	1	0.804	1	1	0.339	1	0.341	1	1	1	0.288	1	0.237	1	0.975	0.01	0.412	1	1	1	0.477	1	1	1	1	1	0.788	0.697	1	1	0.348	1	1	1	1	0.411	1	1	0.754
E016_HUES64_ESC_erc2-chromatin15state-all-files/E016_12_EnhBiv.bed	1	1	1	0.152	0.515	1	1	1	1	0.793	0.326	0.00372	1	1	0.583	1	0.3	1	1	1	0.663	1	1	1	0.874	1	1	1	1	1	0.829	1	1	1	1	1	0.183	0.998	1	1	1	1	1	1	0.955	0.346	1	1	0.929
E016_HUES64_ESC_erc2-chromatin15state-all-files/E016_13_ReprPC.bed	1	1	1	0.0141	1	1	0.162	1	1	0.328	1	0.748	1	1	1	1	0.375	1	0.266	0.436	0.23	1	1	0.0935	0.55	1	1	1	0.453	1	1	1	0.879	1	1	0.206	1	0.902	1	0.25	0.861	1	1	0.163	0.541	1	1	1	0.167
E016_HUES64_ESC_erc2-chromatin15state-all-files/E016_14_ReprPCWk.bed	0.922	1	1	0.115	0.126	0.327	1	0.765	1	0.982	1	0.391	1	0.647	0.258	0.622	0.684	0.164	1	0.66	1	1	0.797	0.159	0.537	1	1	1	0.761	1	0.375	0.116	1	1	0.29	0.83	0.236	0.641	1	1	0.24	1	1	1	0.8	0.0276	0.685	1	0.673
E016_HUES64_ESC_erc2-chromatin15state-all-files/E016_15_Quies.bed	1	1	1	1	1	1	1	1	1	1	1	1	0.18	1	1	1	1	1	1	1	1	1	1	1	1	1	1	1	1	1	1	1	1	1	1	1	1	1	1	0.993	1	1	1	1	1	1	1	1	1
E024_ES-UCSF4_ESC_erc2-chromatin15state-all-files/E024_1_TssA.bed	1	0.55	1	0.2	1	1	1	0.139	1	0.221	1	0.111	1	1	0.0727	1	0.366	1	1	1	0.011	0.991	0.413	1	0.351	0.93	0.587	1	0.462	1	0.156	1	1	1	0.106	1	0.321	0.0218	0.422	1	0.152	0.987	1	1	0.454	1	0.655	1	1
E024_ES-UCSF4_ESC_erc2-chromatin15state-all-files/E024_2_TssAFlnk.bed	1	0.826	0.305	1	1	1	1	0.0235	1	1	1	0.1	1	1	1	0.156	0.535	1	1	0.446	0.0564	1	1	1	1	1	0.0412	1	0.908	1	1	1	1	1	1	1	0.297	0.139	1	1	1	1	1	1	0.948	1	1	1	1
E024_ES-UCSF4_ESC_erc2-chromatin15state-all-files/E024_3_TxFlnk.bed	1	1	0.313	0.212	1	1	1	1	1	1	1	0.22	1	1	1	0.386	1	1	1	1	0.34	0.38	1	1	1	1	1	0.419	1	1	0.401	1	1	1	0.267	1	1	1	1	1	1	1	1	1	1	1	1	1	0.353
E024_ES-UCSF4_ESC_erc2-chromatin15state-all-files/E024_4_Tx.bed	1	1	1	1	1	1	1	0.539	1	0.611	1	0.187	1	1	0.0845	1	0.851	1	1	1	0.985	1	0.0844	1	0.796	0.443	1	0.0363	0.424	1	0.31	1	0.24	1	0.157	1	0.11	0.216	1	1	1	1	1	1	0.11	1	1	1	0.737
E024_ES-UCSF4_ESC_erc2-chromatin15state-all-files/E024_5_TxWk.bed	1	0.845	1	1	0.534	1	1	4.19e-06	1	0.126	1	0.0731	1	1	0.513	1	0.495	1	1	1	0.0129	1	0.826	1	0.999	0.895	0.464	1	0.523	1	0.978	1	0.937	1	1	1	0.0399	1	1	1	1	1	1	1	0.044	0.855	1	1	1
E024_ES-UCSF4_ESC_erc2-chromatin15state-all-files/E024_6_EnhG.bed	1	1	0.917	1	1	1	1	1	1	1	0.992	0.269	1	1	1	0.798	1	1	1	1	0.924	0.056	0.99	1	1	0.695	0.846	1	1	1	0.706	1	0.176	0.98	0.906	0.385	0.064	0.141	1	1	1	1	1	1	1	1	1	1	1
E024_ES-UCSF4_ESC_erc2-chromatin15state-all-files/E024_7_Enh.bed	1	1	1	0.0734	1	1	1	0.00209	1	0.395	0.644	0.0114	1	1	0.281	0.731	1	1	1	1	0.515	1	0.601	1	0.911	0.813	1	1	0.262	1	0.782	1	1	1	1	1	0.509	1	0.552	1	0.716	1	1	1	0.593	0.598	0.0409	1	0.133
E024_ES-UCSF4_ESC_erc2-chromatin15state-all-files/E024_8_ZNF-Rpts.bed	1	1	1	1	1	1	0.657	1	1	1	1	1	1	1	1	1	1	1	1	1	1	1	1	1	1	1	1	1	1	1	1	1	1	1	1	1	1	1	0.0454	1	1	1	1	1	1	1	1	1	1
E024_ES-UCSF4_ESC_erc2-chromatin15state-all-files/E024_9_Het.bed	1	1	1	1	1	1	1	1	1	1	1	1	1	1	1	1	1	1	1	1	1	1	1	1	1	1	1	1	1	0.328	1	1	1	1	1	1	1	1	0.00209	1	1	1	1	1	1	1	1	1	1
E024_ES-UCSF4_ESC_erc2-chromatin15state-all-files/E024_10_TssBiv.bed	1	0.219	1	0.314	1	1	1	1	1	0.758	1	0.373	1	1	1	1	0.463	1	1	1	0.0283	1	0.211	0.392	1	1	0.293	1	1	1	1	1	1	1	1	1	0.655	0.21	1	1	0.126	1	1	0.155	1	1	1	1	1
E024_ES-UCSF4_ESC_erc2-chromatin15state-all-files/E024_11_BivFlnk.bed	1	1	1	1	1	1	1	0.659	1	0.226	1	0.16	1	1	1	1	0.657	1	1	1	0.1	1	0.812	1	0.722	0.327	0.571	0.855	0.518	1	1	1	1	1	0.389	1	0.435	0.105	1	1	1	0.142	1	1	0.56	0.731	1	1	0.562
E024_ES-UCSF4_ESC_erc2-chromatin15state-all-files/E024_12_EnhBiv.bed	1	0.924	1	0.0424	1	1	0.976	1	1	0.614	0.421	0.0627	1	1	1	1	0.00321	1	0.105	1	0.00538	1	0.27	0.256	0.831	0.825	1	1	1	1	1	1	1	1	1	1	0.0184	0.471	1	0.065	0.472	1	1	0.052	1	0.00501	1	1	0.0669
E024_ES-UCSF4_ESC_erc2-chromatin15state-all-files/E024_13_ReprPC.bed	0.874	1	1	0.487	1	1	0.961	1	1	1	0.921	1	1	1	0.864	1	1	1	1	0.778	0.739	1	1	1	0.544	1	1	1	0.453	1	1	1	1	0.299	1	1	0.391	1	0.397	1	0.336	1	1	1	1	0.823	1	1	1
E024_ES-UCSF4_ESC_erc2-chromatin15state-all-files/E024_14_ReprPCWk.bed	0.841	1	1	0.335	1	1	1	1	1	1	1	0.983	1	1	0.978	1	1	0.217	1	0.899	1	1	1	1	1	1	1	1	1	0.0414	0.692	1	1	1	1	1	1	1	0.923	1	0.829	1	1	1	1	0.701	0.997	0.027	0.629
E024_ES-UCSF4_ESC_erc2-chromatin15state-all-files/E024_15_Quies.bed	0.35	0.8	1	1	1	1	1	1	1	1	1	1	0.0521	1	1	1	1	1	0.743	1	1	1	1	1	1	1	0.453	1	1	1	1	1	1	1	1	1	1	0.796	1	0.9	1	1	1	1	1	1	1	1	1
E004_H1_BMP4_Derived_Mesendoderm_Cultured_ES-derived_erc2-chromatin15state-all-files/E004_1_TssA.bed	1	0.36	0.156	0.102	1	1	1	0.201	1	0.457	0.812	0.0206	1	1	0.0562	0.156	0.064	1	1	1	0.0191	0.297	0.72	1	0.253	0.561	0.125	1	0.318	1	0.745	1	1	1	0.107	1	0.032	0.0168	0.354	1	0.154	1	1	1	0.537	0.929	0.685	1	1
E004_H1_BMP4_Derived_Mesendoderm_Cultured_ES-derived_erc2-chromatin15state-all-files/E004_2_TssAFlnk.bed	1	0.826	1	1	1	1	1	0.151	1	1	1	1	1	1	1	1	1	1	1	1	0.816	1	1	1	1	1	1	0.727	1	1	1	1	1	1	1	1	1	0.143	1	1	1	1	1	1	0.521	1	0.78	1	1
E004_H1_BMP4_Derived_Mesendoderm_Cultured_ES-derived_erc2-chromatin15state-all-files/E004_3_TxFlnk.bed	1	1	1	1	1	1	1	1	1	1	1	1	1	1	1	1	1	1	1	1	1	1	1	1	1	1	1	1	1	1	1	1	1	1	1	1	1	1	1	1	1	1	1	1	1	1	1	1	1
E004_H1_BMP4_Derived_Mesendoderm_Cultured_ES-derived_erc2-chromatin15state-all-files/E004_4_Tx.bed	1	1	1	1	1	1	1	1	1	1	1	1	1	1	1	1	1	1	1	1	1	1	1	1	1	1	1	0.497	1	1	1	1	1	1	0.322	1	1	1	1	1	1	1	1	1	1	1	1	1	1
E004_H1_BMP4_Derived_Mesendoderm_Cultured_ES-derived_erc2-chromatin15state-all-files/E004_5_TxWk.bed	1	1	1	1	1	1	1	6.93e-05	1	0.141	1	0.0764	1	1	1	1	0.995	1	1	1	0.156	1	0.587	1	1	0.895	0.282	0.0662	1	1	1	1	0.849	1	0.204	1	0.0772	0.986	1	1	1	1	1	1	0.0428	0.504	1	1	1
E004_H1_BMP4_Derived_Mesendoderm_Cultured_ES-derived_erc2-chromatin15state-all-files/E004_6_EnhG.bed	1	1	1	1	1	1	1	1	1	1	1	1	1	1	1	1	1	1	1	1	1	1	1	1	1	1	1	1	1	1	1	1	1	1	1	1	1	1	1	1	1	1	1	1	1	1	1	1	1
E004_H1_BMP4_Derived_Mesendoderm_Cultured_ES-derived_erc2-chromatin15state-all-files/E004_7_Enh.bed	1	1	1	0.32	1	1	1	0.00159	1	0.991	1	0.505	1	1	1	1	0.53	1	1	1	0.617	1	1	1	1	0.241	1	1	1	1	0.695	1	1	1	1	1	0.984	1	0.467	1	1	1	1	1	0.0733	1	0.756	1	0.976
E004_H1_BMP4_Derived_Mesendoderm_Cultured_ES-derived_erc2-chromatin15state-all-files/E004_8_ZNF-Rpts.bed	1	1	1	1	1	1	1	1	1	1	1	1	1	1	1	1	1	1	1	1	0.586	1	1	1	0.574	1	1	1	1	1	1	1	1	1	1	1	1	1	1	1	1	1	1	1	1	1	1	1	1
E004_H1_BMP4_Derived_Mesendoderm_Cultured_ES-derived_erc2-chromatin15state-all-files/E004_9_Het.bed	1	1	1	1	1	1	0.951	1	1	1	1	1	1	1	0.996	1	1	1	1	1	1	1	1	1	1	1	1	1	0.955	9.75e-05	1	1	0.912	1	1	1	1	1	0.0618	1	1	1	1	1	1	1	1	3.21e-06	1
E004_H1_BMP4_Derived_Mesendoderm_Cultured_ES-derived_erc2-chromatin15state-all-files/E004_10_TssBiv.bed	1	1	1	0.508	1	1	1	0.771	1	1	0.953	0.00311	1	1	1	1	0.0474	1	1	1	0.0405	1	0.873	1	1	0.906	0.241	0.978	1	1	1	1	0.912	1	0.493	1	0.247	0.837	1	1	0.162	1	1	0.0154	0.609	1	1	1	1
E004_H1_BMP4_Derived_Mesendoderm_Cultured_ES-derived_erc2-chromatin15state-all-files/E004_11_BivFlnk.bed	1	1	1	1	1	1	1	1	1	1	1	1	1	1	1	1	1	1	0.237	1	0.196	1	1	1	1	1	1	1	1	1	0.0198	1	1	1	1	1	1	1	1	0.281	1	1	1	1	1	1	1	1	1
E004_H1_BMP4_Derived_Mesendoderm_Cultured_ES-derived_erc2-chromatin15state-all-files/E004_12_EnhBiv.bed	1	1	1	1	1	1	1	1	1	0.127	1	1	1	1	1	1	0.134	1	1	1	0.056	1	1	1	0.281	0.698	1	1	1	1	1	1	1	1	1	1	0.822	1	1	1	1	1	1	1	1	1	1	1	1
E004_H1_BMP4_Derived_Mesendoderm_Cultured_ES-derived_erc2-chromatin15state-all-files/E004_13_ReprPC.bed	1	0.0856	1	0.00351	1	1	0.535	1	1	0.15	1	0.482	1	1	1	1	0.181	1	0.314	0.312	0.0131	1	0.145	0.0877	0.808	0.984	0.745	1	0.469	1	0.842	1	1	0.584	1	1	0.0125	0.686	1	0.306	0.0877	0.971	0.72	0.229	1	1	1	1	0.126
E004_H1_BMP4_Derived_Mesendoderm_Cultured_ES-derived_erc2-chromatin15state-all-files/E004_14_ReprPCWk.bed	1	1	1	0.395	0.581	1	0.406	0.291	1	1	0.939	0.0114	1	0.98	0.093	0.91	0.537	0.706	1	0.784	0.778	1	0.627	1	0.911	1	1	1	1	0.949	0.891	0.905	1	1	1	1	0.366	1	1	1	0.352	1	1	0.997	0.271	0.66	0.709	1	0.282
E004_H1_BMP4_Derived_Mesendoderm_Cultured_ES-derived_erc2-chromatin15state-all-files/E004_15_Quies.bed	0.58	1	1	1	1	1	1	1	1	1	1	1	1	1	1	1	1	1	1	1	1	1	1	1	1	1	1	1	1	1	0.471	1	1	1	1	1	1	0.986	1	1	1	1	1	1	1	1	1	1	1
E005_H1_BMP4_Derived_Trophoblast_Cultured_ES-derived_erc2-chromatin15state-all-files/E005_1_TssA.bed	1	0.631	0.992	0.04	1	0.912	1	0.21	1	0.377	0.819	0.0621	1	1	0.0109	0.872	0.188	1	1	1	0.0313	1	0.259	1	0.53	0.682	0.452	1	0.525	1	0.361	1	1	1	0.0453	1	0.162	0.06	0.125	1	0.0811	1	1	1	0.507	1	1	1	1
E005_H1_BMP4_Derived_Trophoblast_Cultured_ES-derived_erc2-chromatin15state-all-files/E005_2_TssAFlnk.bed	0.646	1	0.722	1	1	1	1	0.0625	1	1	1	0.481	1	1	1	0.632	0.97	1	1	1	0.284	0.497	1	1	0.334	1	1	1	0.424	1	0.0483	1	1	1	1	1	0.132	0.228	1	1	1	1	1	0.0369	1	1	1	1	1
E005_H1_BMP4_Derived_Trophoblast_Cultured_ES-derived_erc2-chromatin15state-all-files/E005_3_TxFlnk.bed	0.626	1	1	1	1	1	1	1	1	1	1	0.0629	1	1	1	1	0.0923	1	0.406	1	0.15	1	1	1	1	0.591	1	1	1	1	0.545	1	1	1	1	0.915	0.0016	1	1	0.466	1	1	1	1	1	0.593	0.647	1	1
E005_H1_BMP4_Derived_Trophoblast_Cultured_ES-derived_erc2-chromatin15state-all-files/E005_4_Tx.bed	1	1	0.75	1	1	1	1	0.000624	1	0.555	1	0.0635	1	1	0.181	1	1	1	1	1	0.624	0.824	0.129	1	0.221	1	1	0.135	0.0176	1	0.303	1	0.104	1	0.203	0.351	0.0265	0.287	0.532	1	1	1	1	1	0.0105	1	1	1	0.719
E005_H1_BMP4_Derived_Trophoblast_Cultured_ES-derived_erc2-chromatin15state-all-files/E005_5_TxWk.bed	1	1	1	1	1	1	1	0.000349	1	0.639	0.82	0.304	1	1	1	1	0.258	1	1	1	0.116	1	0.399	1	1	0.419	1	0.419	1	1	0.793	1	0.315	1	1	1	0.000195	1	1	0.9	1	1	1	1	0.0872	1	1	1	0.668
E005_H1_BMP4_Derived_Trophoblast_Cultured_ES-derived_erc2-chromatin15state-all-files/E005_6_EnhG.bed	1	1	1	1	1	1	1	0.28	1	0.957	0.048	0.112	1	1	0.598	1	0.53	1	1	1	0.11	1	1	1	1	0.255	1	1	0.707	1	0.0282	1	1	1	0.777	1	0.268	0.841	0.0308	1	1	1	1	1	0.316	0.0136	1	1	0.0146
E005_H1_BMP4_Derived_Trophoblast_Cultured_ES-derived_erc2-chromatin15state-all-files/E005_7_Enh.bed	1	1	1	0.115	1	0.873	0.381	0.00219	1	1	1	0.00789	1	1	0.0791	0.204	0.0708	1	1	0.94	0.48	1	1	1	0.153	0.172	1	0.916	0.244	1	1	1	0.911	1	0.267	0.177	0.437	0.807	0.164	1	0.722	1	1	1	0.402	0.0682	1	1	0.562
E005_H1_BMP4_Derived_Trophoblast_Cultured_ES-derived_erc2-chromatin15state-all-files/E005_8_ZNF-Rpts.bed	1	1	1	1	1	1	1	0.306	1	1	1	0.85	1	1	0.44	1	1	1	1	1	0.766	1	1	1	1	1	0.605	1	1	1	1	1	1	1	1	1	1	1	1	1	1	1	1	0.699	0.751	1	0.835	1	1
E005_H1_BMP4_Derived_Trophoblast_Cultured_ES-derived_erc2-chromatin15state-all-files/E005_9_Het.bed	1	1	1	1	1	1	0.162	1	1	1	1	1	1	1	0.321	1	1	1	1	1	1	1	1	1	1	1	1	1	1	6.7e-06	1	1	1	1	0.666	0.385	1	0.588	0.218	1	0.868	1	1	1	1	1	1	1.07e-05	0.956
E005_H1_BMP4_Derived_Trophoblast_Cultured_ES-derived_erc2-chromatin15state-all-files/E005_10_TssBiv.bed	1	1	1	0.215	1	1	1	1	1	1	1	0.238	1	1	1	1	0.283	1	1	1	0.375	1	0.467	1	1	1	1	1	1	1	0.347	1	1	1	1	1	0.0975	1	1	1	1	1	1	1	1	1	1	1	1
E005_H1_BMP4_Derived_Trophoblast_Cultured_ES-derived_erc2-chromatin15state-all-files/E005_11_BivFlnk.bed	1	0.826	1	1	1	1	1	1	1	0.455	1	0.00494	1	1	1	1	0.0263	1	1	1	0.00218	1	0.71	1	1	0.768	0.0115	0.804	1	1	1	1	0.745	1	0.357	1	0.309	0.685	1	1	1	0.0442	1	1	0.472	1	1	1	0.495
E005_H1_BMP4_Derived_Trophoblast_Cultured_ES-derived_erc2-chromatin15state-all-files/E005_12_EnhBiv.bed	1	1	1	1	1	1	1	1	1	0.154	0.992	0.673	1	1	1	1	0.286	1	0.198	1	0.00488	1	0.407	0.61	0.412	0.933	1	1	1	1	1	1	1	1	1	1	0.295	0.509	1	0.114	0.231	0.142	1	1	1	1	0.78	1	0.713
E005_H1_BMP4_Derived_Trophoblast_Cultured_ES-derived_erc2-chromatin15state-all-files/E005_13_ReprPC.bed	1	0.219	1	0.0166	0.646	1	1	1	1	0.0477	1	0.19	1	1	1	1	0.307	1	0.46	1	0.0537	1	1	0.128	0.562	0.489	0.403	1	0.713	1	1	1	1	0.249	1	1	0.041	0.951	1	0.437	0.0231	1	1	1	0.741	0.929	1	1	0.368
E005_H1_BMP4_Derived_Trophoblast_Cultured_ES-derived_erc2-chromatin15state-all-files/E005_14_ReprPCWk.bed	0.0113	1	1	0.12	1	1	0.895	1	1	1	1	0.198	1	1	0.124	0.836	1	0.553	1	0.753	0.775	1	1	0.101	1	1	1	1	0.891	1	0.532	1	1	1	1	0.0755	1	0.925	1	1	1	1	0.226	0.916	0.399	1	0.996	1	0.587
E005_H1_BMP4_Derived_Trophoblast_Cultured_ES-derived_erc2-chromatin15state-all-files/E005_15_Quies.bed	1	0.176	1	1	1	1	1	1	1	1	1	1	1	1	1	1	1	1	1	1	1	1	1	1	1	1	0.338	1	1	1	1	1	1	1	1	1	1	1	1	1	1	1	1	1	1	1	1	1	1
E006_H1_Derived_Mesenchymal_Stem_Cells_ES-derived_erc2-chromatin15state-all-files/E006_1_TssA.bed	1	0.654	1	0.331	1	0.912	1	0.0118	1	0.416	0.829	0.0131	1	1	0.0116	1	0.0904	1	1	1	0.0071	1	0.413	1	0.537	1	0.501	1	0.873	1	0.871	1	1	1	0.107	1	0.11	0.0163	0.107	1	0.0807	1	1	1	0.53	1	1	1	0.787
E006_H1_Derived_Mesenchymal_Stem_Cells_ES-derived_erc2-chromatin15state-all-files/E006_2_TssAFlnk.bed	1	1	0.722	0.266	1	1	1	1	1	0.797	1	0.0924	1	1	1	0.63	0.225	1	0.801	1	0.0219	1	1	1	0.692	1	0.116	1	0.424	1	0.012	1	1	1	1	1	0.00354	0.815	1	0.781	0.165	0.174	1	0.411	0.959	1	1	1	1
E006_H1_Derived_Mesenchymal_Stem_Cells_ES-derived_erc2-chromatin15state-all-files/E006_3_TxFlnk.bed	1	1	1	1	1	1	1	1	1	1	1	0.348	1	1	1	1	0.438	1	0.461	0.0701	0.0298	1	0.604	1	0.619	0.663	1	1	1	1	0.545	1	1	1	1	1	0.24	0.185	1	0.41	1	1	1	1	0.444	1	0.685	1	1
E006_H1_Derived_Mesenchymal_Stem_Cells_ES-derived_erc2-chromatin15state-all-files/E006_4_Tx.bed	1	1	1	1	1	1	1	0.00109	1	0.808	1	0.0326	1	1	0.0148	1	1	0.552	1	1	0.378	1	0.408	1	1	1	1	0.244	0.104	0.795	0.318	1	0.232	1	0.165	0.235	0.0071	0.129	0.331	1	0.877	1	1	1	0.0084	1	1	1	0.758
E006_H1_Derived_Mesenchymal_Stem_Cells_ES-derived_erc2-chromatin15state-all-files/E006_5_TxWk.bed	0.664	1	1	0.388	1	1	1	0.0117	1	0.0529	0.626	0.294	1	1	1	1	0.179	1	1	1	0.00138	1	0.72	1	0.901	0.922	1	0.0363	0.497	1	0.963	1	0.219	1	1	1	2.6e-05	1	1	0.962	1	1	1	1	1	1	1	1	0.984
E006_H1_Derived_Mesenchymal_Stem_Cells_ES-derived_erc2-chromatin15state-all-files/E006_6_EnhG.bed	1	0.851	0.596	0.615	0.913	1	1	0.0036	1	1	1	0.0375	1	1	0.0109	0.567	1	1	1	1	0.0467	0.275	0.561	1	0.302	0.151	1	1	0.22	1	0.0434	1	1	1	0.75	1	0.329	0.645	0.0587	1	0.954	0.987	1	1	0.0571	0.0149	0.756	1	0.043
E006_H1_Derived_Mesenchymal_Stem_Cells_ES-derived_erc2-chromatin15state-all-files/E006_7_Enh.bed	1	1	1	0.0536	1	1	1	0.00298	1	0.991	0.985	0.00471	1	1	0.156	0.156	0.867	1	0.859	1	0.0182	1	1	1	0.00171	0.0958	1	1	0.0325	1	0.325	1	0.647	1	0.447	0.677	0.0426	0.639	0.143	0.862	1	1	1	0.357	0.0736	0.172	0.668	1	0.0141
E006_H1_Derived_Mesenchymal_Stem_Cells_ES-derived_erc2-chromatin15state-all-files/E006_8_ZNF-Rpts.bed	1	1	1	1	1	1	0.557	1	1	1	1	1	1	1	0.592	1	1	1	1	1	0.812	1	1	1	0.911	1	1	1	1	1	0.569	1	1	1	0.935	1	1	0.501	0.938	1	1	1	1	1	1	1	1	1	1
E006_H1_Derived_Mesenchymal_Stem_Cells_ES-derived_erc2-chromatin15state-all-files/E006_9_Het.bed	1	1	1	1	1	1	1	1	1	1	1	1	1	1	1	1	1	1	1	1	1	1	1	1	1	1	1	1	1	0.00121	1	1	1	1	1	0.487	1	0.572	1	1	0.629	1	1	1	1	1	1	0.983	1
E006_H1_Derived_Mesenchymal_Stem_Cells_ES-derived_erc2-chromatin15state-all-files/E006_10_TssBiv.bed	1	1	1	1	1	1	1	0.205	1	1	1	1	1	1	1	1	1	1	1	1	1	1	1	1	1	1	1	1	1	1	1	1	1	1	1	1	1	1	1	1	1	1	1	1	1	1	1	1	1
E006_H1_Derived_Mesenchymal_Stem_Cells_ES-derived_erc2-chromatin15state-all-files/E006_11_BivFlnk.bed	1	1	1	0.32	1	1	1	1	1	0.787	1	0.414	1	1	1	1	1	1	1	1	0.173	1	0.608	1	1	0.628	1	0.638	1	1	1	1	1	1	0.303	1	0.679	1	1	1	1	1	1	1	1	1	1	1	0.46
E006_H1_Derived_Mesenchymal_Stem_Cells_ES-derived_erc2-chromatin15state-all-files/E006_12_EnhBiv.bed	0.626	1	1	0.405	1	1	0.9	0.548	1	0.000506	0.842	0.0682	1	1	1	1	0.262	1	1	1	0.0929	1	0.827	0.409	0.781	1	1	1	0.368	1	0.443	1	1	0.738	1	1	0.316	0.217	1	1	0.268	1	1	1	0.454	1	1	1	0.943
E006_H1_Derived_Mesenchymal_Stem_Cells_ES-derived_erc2-chromatin15state-all-files/E006_13_ReprPC.bed	0.344	1	0.648	0.127	1	0.877	1	1	1	1	1	0.0902	1	0.7	1	0.724	0.133	1	1	0.139	0.755	1	0.743	0.227	1	1	1	1	1	1	1	1	1	0.301	1	0.145	0.924	0.361	0.908	1	0.0874	1	1	1	1	0.207	1	1	0.943
E006_H1_Derived_Mesenchymal_Stem_Cells_ES-derived_erc2-chromatin15state-all-files/E006_14_ReprPCWk.bed	1	1	1	1	1	0.912	0.0753	1	1	1	1	1	1	1	0.0361	0.622	1	0.799	1	0.342	1	1	0.935	1	0.645	1	1	1	1	1	0.714	0.000327	1	0.844	1	0.279	1	0.772	0.435	1	0.592	1	1	0.794	1	0.981	1	1	1
E006_H1_Derived_Mesenchymal_Stem_Cells_ES-derived_erc2-chromatin15state-all-files/E006_15_Quies.bed	1	0.00694	1	1	1	1	1	1	1	0.765	1	1	0.00612	1	1	1	1	1	1	1	1	1	1	1	1	1	0.0239	1	1	1	1	1	1	1	1	1	1	1	1	1	1	1	1	1	1	1	1	1	1
E007_H1_Derived_Neuronal_Progenitor_Cultured_ES-derived_erc2-chromatin15state-all-files/E007_1_TssA.bed	1	0.337	1	0.207	1	0.939	1	0.133	1	0.169	0.41	0.000947	1	1	0.02	1	0.0172	1	1	1	0.000216	1	0.647	1	0.767	1	0.00701	1	0.431	1	0.251	1	0.932	1	0.0877	1	0.23	0.0565	0.167	1	0.0812	1	1	1	0.714	1	1	1	1
E007_H1_Derived_Neuronal_Progenitor_Cultured_ES-derived_erc2-chromatin15state-all-files/E007_2_TssAFlnk.bed	1	1	0.657	1	1	1	1	0.756	1	1	1	1	1	1	1	0.465	0.689	1	1	0.763	0.5	1	1	1	0.372	1	1	0.285	1	1	1	1	1	1	1	1	0.267	1	1	1	1	1	1	1	1	0.811	0.799	1	1
E007_H1_Derived_Neuronal_Progenitor_Cultured_ES-derived_erc2-chromatin15state-all-files/E007_3_TxFlnk.bed	1	1	1	1	1	1	1	1	1	1	1	0.112	1	1	1	1	1	1	0.178	1	1	1	1	1	1	1	1	1	1	1	1	1	1	1	1	1	1	1	1	0.324	1	1	1	1	1	1	1	1	1
E007_H1_Derived_Neuronal_Progenitor_Cultured_ES-derived_erc2-chromatin15state-all-files/E007_4_Tx.bed	1	1	0.368	1	1	1	1	0.366	1	0.475	1	0.395	1	1	0.251	0.758	1	1	1	1	1	1	0.887	1	0.918	1	1	0.242	1	1	0.469	1	0.33	1	0.371	1	0.693	0.561	1	1	1	1	1	1	0.0957	0.822	0.835	1	0.41
E007_H1_Derived_Neuronal_Progenitor_Cultured_ES-derived_erc2-chromatin15state-all-files/E007_5_TxWk.bed	1	1	1	0.947	1	1	1	3.69e-08	1	0.303	1	0.0796	1	1	0.22	1	0.776	1	1	0.941	0.137	1	0.086	1	1	0.356	1	0.577	0.14	1	0.348	1	1	1	0.906	1	7.78e-08	0.713	1	1	1	1	1	1	0.0733	0.731	1	1	1
E007_H1_Derived_Neuronal_Progenitor_Cultured_ES-derived_erc2-chromatin15state-all-files/E007_6_EnhG.bed	1	1	1	1	1	1	1	1	1	0.897	1	0.132	1	1	1	1	0.601	1	1	1	1	1	1	1	1	0.241	1	1	1	1	0.691	1	0.745	1	1	1	0.82	0.793	1	1	1	1	1	1	1	1	1	1	0.126
E007_H1_Derived_Neuronal_Progenitor_Cultured_ES-derived_erc2-chromatin15state-all-files/E007_7_Enh.bed	1	1	0.383	0.232	1	1	1	0.361	1	0.227	1	0.15	1	1	0.0185	0.216	0.705	1	1	1	0.304	0.497	1	1	1	1	1	1	0.931	1	0.706	1	1	1	1	0.892	0.396	0.54	0.408	1	0.837	1	1	1	1	1	0.631	1	0.527
E007_H1_Derived_Neuronal_Progenitor_Cultured_ES-derived_erc2-chromatin15state-all-files/E007_8_ZNF-Rpts.bed	1	1	1	1	1	1	1	1	1	1	1	1	1	1	1	1	1	1	1	1	0.663	1	0.808	1	0.817	1	1	1	0.864	0.892	1	1	1	1	1	0.865	1	1	0.648	1	1	1	1	1	0.902	1	1	1	0.941
E007_H1_Derived_Neuronal_Progenitor_Cultured_ES-derived_erc2-chromatin15state-all-files/E007_9_Het.bed	1	1	1	1	1	1	1	1	1	1	0.938	1	1	1	0.316	1	1	1	1	1	1	1	1	1	1	1	1	1	0.593	1	1	0.886	1	1	0.72	0.868	1	0.933	0.0999	1	0.834	1	1	1	1	1	1	0.896	1
E007_H1_Derived_Neuronal_Progenitor_Cultured_ES-derived_erc2-chromatin15state-all-files/E007_10_TssBiv.bed	1	0.629	1	0.248	1	1	1	1	1	0.217	1	0.052	1	1	1	1	0.404	1	1	1	1	1	0.133	1	1	0.517	1	0.578	1	1	1	1	1	1	0.317	1	0.151	0.128	1	1	1	0.0704	1	1	1	1	1	1	1
E007_H1_Derived_Neuronal_Progenitor_Cultured_ES-derived_erc2-chromatin15state-all-files/E007_11_BivFlnk.bed	1	1	1	1	1	1	1	0.184	1	1	1	1	1	1	1	1	1	1	1	1	1	1	1	1	1	1	1	1	1	1	0.272	1	1	1	1	1	0.259	1	1	1	1	1	1	0.0374	0.0092	1	1	1	1
E007_H1_Derived_Neuronal_Progenitor_Cultured_ES-derived_erc2-chromatin15state-all-files/E007_12_EnhBiv.bed	1	1	1	0.0545	1	1	1	1	1	0.749	1	0.0762	1	1	1	1	0.503	1	1	1	0.0058	1	1	0.391	1	0.626	1	1	1	1	1	1	1	1	1	1	0.659	0.181	1	1	1	1	1	1	1	1	1	1	0.45
E007_H1_Derived_Neuronal_Progenitor_Cultured_ES-derived_erc2-chromatin15state-all-files/E007_13_ReprPC.bed	1	1	1	0.0734	1	1	1	1	1	0.156	1	0.19	1	1	1	1	0.0162	1	0.00645	1	1.62e-05	1	0.62	0.196	0.681	0.285	0.276	1	0.372	1	1	1	1	0.817	1	0.718	0.000563	0.772	1	0.0046	0.00778	0.22	1	1	1	0.489	1	1	0.398
E007_H1_Derived_Neuronal_Progenitor_Cultured_ES-derived_erc2-chromatin15state-all-files/E007_14_ReprPCWk.bed	0.415	0.567	1	0.147	1	1	0.0673	0.808	1	0.231	1	0.0305	1	0.132	1	1	0.968	1	1	1	1	1	0.209	0.776	0.791	0.906	1	1	0.827	1	1	1	1	1	1	1	0.699	0.86	1	1	1	1	1	0.0843	0.901	0.433	1	1	0.582
E007_H1_Derived_Neuronal_Progenitor_Cultured_ES-derived_erc2-chromatin15state-all-files/E007_15_Quies.bed	0.854	1	1	1	1	1	1	1	1	1	1	1	0.334	1	1	1	1	1	1	1	1	1	1	1	0.975	1	1	1	1	1	1	1	1	1	1	1	1	1	1	1	1	1	1	1	1	1	1	1	1
E009_H9_Derived_Neuronal_Progenitor_Cultured_ES-derived_erc2-chromatin15state-all-files/E009_1_TssA.bed	1	0.33	1	0.0997	1	1	0.902	0.0855	1	0.0253	1	0.00882	1	1	0.115	1	0.126	1	1	0.3	0.013	1	0.93	1	0.831	1	0.158	1	1	1	0.475	1	1	1	0.75	1	0.268	0.00945	0.236	1	0.199	1	1	1	1	0.662	0.912	1	0.979
E009_H9_Derived_Neuronal_Progenitor_Cultured_ES-derived_erc2-chromatin15state-all-files/E009_2_TssAFlnk.bed	1	1	1	1	1	1	1	1	1	1	1	0.692	1	1	1	1	0.533	1	1	0.339	0.421	1	1	1	0.372	0.546	1	0.978	0.453	1	0.362	1	1	1	0.579	1	0.105	0.837	1	1	1	0.987	1	1	0.797	0.612	0.756	1	1
E009_H9_Derived_Neuronal_Progenitor_Cultured_ES-derived_erc2-chromatin15state-all-files/E009_3_TxFlnk.bed	1	1	0.156	1	1	1	1	0.903	1	1	1	0.0904	1	1	1	0.156	0.793	1	1	1	0.98	0.056	0.422	1	0.935	0.431	0.784	0.978	0.757	1	0.912	1	1	1	0.203	1	0.058	0.98	1	1	1	1	1	1	1	1	0.809	1	0.733
E009_H9_Derived_Neuronal_Progenitor_Cultured_ES-derived_erc2-chromatin15state-all-files/E009_4_Tx.bed	1	1	1	1	1	1	1	0.0348	1	0.312	1	0.674	1	1	0.22	1	1	1	1	1	0.923	1	0.0866	1	1	0.172	0.881	0.038	0.604	1	0.457	1	0.0113	1	0.459	1	0.000348	0.641	1	1	1	1	1	1	0.175	1	1	1	1
E009_H9_Derived_Neuronal_Progenitor_Cultured_ES-derived_erc2-chromatin15state-all-files/E009_5_TxWk.bed	1	1	1	0.72	0.581	1	1	0.000603	1	0.000506	1	0.00868	1	1	1	1	0.00122	1	1	1	0.00993	1	0.467	1	1	1	1	0.795	0.922	1	0.661	1	0.0986	1	0.933	1	0.000435	1	1	1	1	1	1	1	0.00322	0.0612	1	1	1
E009_H9_Derived_Neuronal_Progenitor_Cultured_ES-derived_erc2-chromatin15state-all-files/E009_6_EnhG.bed	1	1	1	1	1	1	1	1	1	1	1	0.227	1	1	0.166	1	0.736	1	0.876	1	1	1	0.561	1	1	0.594	1	1	0.61	1	0.944	1	1	1	1	1	1	0.431	0.955	0.868	1	1	1	1	1	0.431	1	1	1
E009_H9_Derived_Neuronal_Progenitor_Cultured_ES-derived_erc2-chromatin15state-all-files/E009_7_Enh.bed	1	0.379	1	0.942	1	1	1	0.0174	1	0.611	0.939	0.146	1	1	1	1	1	1	1	1	0.0601	1	0.694	1	1	0.634	1	1	0.493	1	1	1	1	0.108	1	1	0.25	0.889	0.517	1	0.3	1	1	1	0.0713	1	1	1	0.494
E009_H9_Derived_Neuronal_Progenitor_Cultured_ES-derived_erc2-chromatin15state-all-files/E009_8_ZNF-Rpts.bed	1	1	1	1	1	1	1	1	1	1	1	0.82	1	1	1	1	1	1	1	1	0.384	1	1	1	1	1	1	1	1	1	0.871	1	1	1	0.716	1	1	1	1	1	1	1	1	1	1	1	1	1	1
E009_H9_Derived_Neuronal_Progenitor_Cultured_ES-derived_erc2-chromatin15state-all-files/E009_9_Het.bed	1	1	1	1	1	1	1	0.32	1	1	0.0561	1	1	1	1	1	0.736	1	1	1	0.481	1	1	1	1	1	0.864	1	1	1	0.805	1	1	1	1	0.644	1	0.727	0.506	1	0.724	1	1	1	1	1	1	1	1
E009_H9_Derived_Neuronal_Progenitor_Cultured_ES-derived_erc2-chromatin15state-all-files/E009_10_TssBiv.bed	0.177	0.769	1	1	1	1	1	1	1	1	1	0.396	1	1	1	1	1	1	1	1	0.045	1	1	1	1	1	0.024	0.665	1	1	0.597	1	1	1	0.349	1	0.267	0.684	1	1	1	1	1	1	1	1	1	1	1
E009_H9_Derived_Neuronal_Progenitor_Cultured_ES-derived_erc2-chromatin15state-all-files/E009_11_BivFlnk.bed	1	1	1	1	1	1	1	1	1	0.846	1	0.445	1	1	1	1	0.115	1	1	1	0.0466	1	1	1	1	1	1	1	0.51	1	1	1	0.713	1	1	1	1	0.722	1	1	1	1	1	1	0.46	1	1	1	1
E009_H9_Derived_Neuronal_Progenitor_Cultured_ES-derived_erc2-chromatin15state-all-files/E009_12_EnhBiv.bed	1	1	1	0.115	1	1	1	1	1	0.268	0.711	0.553	1	1	1	1	1	1	0.876	1	0.0537	1	1	1	0.781	0.145	0.501	1	0.821	1	0.706	1	0.54	1	1	1	0.106	0.622	1	0.868	1	1	1	0.029	0.886	1	0.957	1	0.406
E009_H9_Derived_Neuronal_Progenitor_Cultured_ES-derived_erc2-chromatin15state-all-files/E009_13_ReprPC.bed	1	1	0.888	0.0811	1	1	0.0673	1	1	0.253	1	0.0216	1	1	0.974	1	0.775	1	0.864	0.929	0.196	1	1	0.344	0.621	0.634	1	0.537	1	1	1	1	1	0.187	1	0.145	0.931	0.846	0.725	0.52	0.203	1	0.774	0.248	1	0.32	1	1	0.0224
E009_H9_Derived_Neuronal_Progenitor_Cultured_ES-derived_erc2-chromatin15state-all-files/E009_14_ReprPCWk.bed	0.011	1	1	0.126	1	0.00454	0.664	1	1	1	0.207	1	1	0.132	0.0206	0.484	1	0.864	1	0.312	1	0.726	1	1	0.249	1	1	1	0.184	0.556	0.121	0.947	1	1	0.247	0.578	1	0.335	0.201	1	0.626	1	1	0.758	0.817	1	1	0.0689	0.313
E009_H9_Derived_Neuronal_Progenitor_Cultured_ES-derived_erc2-chromatin15state-all-files/E009_15_Quies.bed	1	0.252	1	1	1	1	1	1	1	1	1	1	0.156	1	1	1	1	1	1	1	1	1	1	1	1	1	1	1	1	0.339	1	1	1	1	1	1	1	1	1	1	1	1	1	1	1	1	1	1	1
E010_H9_Derived_Neuron_Cultured_ES-derived_erc2-chromatin15state-all-files/E010_1_TssA.bed	1	0.199	1	0.116	1	1	0.657	0.31	1	0.00309	0.857	0.000785	1	1	0.0779	1	0.111	1	1	0.371	0.0192	1	0.685	1	1	1	0.168	1	0.921	1	0.13	1	1	1	0.313	1	0.647	0.06	0.135	1	0.152	1	1	1	0.942	0.406	1	1	0.823
E010_H9_Derived_Neuron_Cultured_ES-derived_erc2-chromatin15state-all-files/E010_2_TssAFlnk.bed	1	0.709	0.657	1	1	1	1	0.644	1	1	1	0.698	1	1	1	0.287	0.683	1	1	0.711	0.481	1	0.982	1	0.131	0.977	1	0.573	0.775	1	0.661	1	1	1	0.861	1	0.064	0.537	1	1	1	1	1	1	1	0.492	0.287	1	1
E010_H9_Derived_Neuron_Cultured_ES-derived_erc2-chromatin15state-all-files/E010_3_TxFlnk.bed	1	1	1	1	1	1	1	0.722	1	1	1	0.0492	1	1	1	1	0.661	1	0.507	1	1	1	0.331	1	1	1	1	0.834	1	1	0.822	1	1	1	0.579	1	0.0186	0.909	1	0.528	1	1	1	1	1	1	1	1	0.603
E010_H9_Derived_Neuron_Cultured_ES-derived_erc2-chromatin15state-all-files/E010_4_Tx.bed	1	1	1	1	1	1	1	0.122	1	0.385	1	0.443	1	1	0.334	1	1	1	1	1	1	1	0.0364	1	1	0.225	1	0.038	0.689	1	0.4	1	0.0113	1	0.601	1	0.000841	0.609	1	1	1	1	1	1	0.15	1	1	1	1
E010_H9_Derived_Neuron_Cultured_ES-derived_erc2-chromatin15state-all-files/E010_5_TxWk.bed	1	0.653	1	0.583	0.682	1	1	6.42e-06	1	4.63e-05	1	0.176	1	1	0.974	1	0.0182	1	1	1	0.0061	1	0.351	1	1	1	0.567	1	0.643	1	0.596	1	1	1	1	1	0.000255	1	1	1	1	1	1	1	0.133	0.309	1	1	0.979
E010_H9_Derived_Neuron_Cultured_ES-derived_erc2-chromatin15state-all-files/E010_6_EnhG.bed	1	0.708	0.942	1	1	1	1	0.844	1	0.497	1	1	1	1	1	1	1	1	1	1	0.872	0.704	1	1	0.701	0.172	1	1	1	1	0.698	1	1	1	0.947	1	1	0.742	1	1	1	1	1	0.715	1	0.849	1	1	1
E010_H9_Derived_Neuron_Cultured_ES-derived_erc2-chromatin15state-all-files/E010_7_Enh.bed	1	0.717	1	0.422	1	1	1	0.152	1	0.739	1	0.0228	1	1	0.791	1	0.59	0.573	1	0.528	0.0446	1	0.537	1	1	0.564	1	1	1	1	1	1	1	0.171	1	1	0.396	0.921	0.671	1	1	1	1	1	0.201	1	1	1	0.737
E010_H9_Derived_Neuron_Cultured_ES-derived_erc2-chromatin15state-all-files/E010_8_ZNF-Rpts.bed	1	1	1	1	1	1	0.905	1	1	1	1	1	1	1	0.879	1	1	1	1	1	0.38	1	1	1	0.929	1	1	1	1	1	1	1	1	1	0.607	1	1	0.926	1	1	1	1	1	1	1	1	1	1	1
E010_H9_Derived_Neuron_Cultured_ES-derived_erc2-chromatin15state-all-files/E010_9_Het.bed	1	1	1	1	1	1	0.872	1	1	1	1	0.604	1	1	1	1	1	1	1	1	1	1	1	1	1	1	0.435	1	0.931	1	0.963	1	1	1	0.509	0.687	0.989	0.66	0.874	1	1	0.987	1	1	1	1	1	1	0.472
E010_H9_Derived_Neuron_Cultured_ES-derived_erc2-chromatin15state-all-files/E010_10_TssBiv.bed	1	1	1	1	1	1	1	1	1	1	1	0.269	1	1	1	1	1	1	1	1	0.0766	1	1	1	1	1	0.185	1	1	1	1	1	1	1	1	1	0.0282	1	1	1	1	1	1	1	1	1	1	1	1
E010_H9_Derived_Neuron_Cultured_ES-derived_erc2-chromatin15state-all-files/E010_11_BivFlnk.bed	0.85	0.851	1	1	1	1	1	1	1	0.488	1	0.509	1	1	1	1	0.602	1	1	1	0.0884	1	0.737	1	1	1	0.179	1	0.598	1	0.71	1	0.781	1	1	1	0.385	0.799	1	1	1	0.128	1	1	0.528	1	1	1	1
E010_H9_Derived_Neuron_Cultured_ES-derived_erc2-chromatin15state-all-files/E010_12_EnhBiv.bed	1	1	1	0.111	1	1	0.139	0.21	1	0.834	1	0.625	1	1	1	1	0.583	1	1	1	0.955	1	1	1	1	0.169	0.576	1	0.873	1	1	1	1	1	0.769	1	0.492	0.94	1	1	0.0782	1	1	0.0477	0.156	1	1	1	0.926
E010_H9_Derived_Neuron_Cultured_ES-derived_erc2-chromatin15state-all-files/E010_13_ReprPC.bed	0.0767	1	1	0.00651	1	1	0.808	1	1	0.635	1	0.165	1	1	0.0877	1	0.85	0.282	0.553	0.967	0.0838	1	1	0.672	0.722	0.436	1	0.52	0.82	1	0.746	1	1	0.584	0.534	0.354	0.989	0.718	1	0.558	0.456	1	0.774	0.834	0.661	0.0102	0.756	1	0.0451
E010_H9_Derived_Neuron_Cultured_ES-derived_erc2-chromatin15state-all-files/E010_14_ReprPCWk.bed	0.00599	1	1	0.673	1	0.0457	1	1	1	1	0.639	1	1	0.222	0.084	0.0606	1	1	1	0.347	1	0.916	1	1	0.77	1	1	1	0.965	3.34e-05	0.282	0.793	1	1	0.682	0.538	1	0.713	0.0719	1	1	1	1	1	1	1	1	0.0673	0.28
E010_H9_Derived_Neuron_Cultured_ES-derived_erc2-chromatin15state-all-files/E010_15_Quies.bed	1	0.219	1	1	1	1	0.749	1	1	1	1	1	0.214	1	1	1	1	1	1	1	1	1	1	1	0.975	1	0.99	1	1	1	1	1	1	1	1	1	1	1	1	1	1	1	1	1	1	1	1	1	1
E011_hESC_Derived_CD184+_Endoderm_Cultured_ES-derived_erc2-chromatin15state-all-files/E011_1_TssA.bed	1	0.693	0.69	0.209	1	1	1	0.112	1	0.549	0.791	0.0349	1	1	0.251	0.758	0.337	1	1	0.502	0.0335	1	1	1	0.407	1	0.0677	1	0.741	1	0.373	1	1	1	0.0684	1	0.0441	0.0269	0.991	1	0.368	1	1	1	0.552	0.977	1	1	1
E011_hESC_Derived_CD184+_Endoderm_Cultured_ES-derived_erc2-chromatin15state-all-files/E011_2_TssAFlnk.bed	1	0.78	1	1	1	1	1	0.526	1	1	0.648	0.643	1	1	0.816	1	1	1	0.917	1	0.959	0.826	1	1	1	1	1	1	1	1	0.805	1	1	1	1	1	0.742	1	1	0.993	1	1	1	1	1	1	0.756	1	1
E011_hESC_Derived_CD184+_Endoderm_Cultured_ES-derived_erc2-chromatin15state-all-files/E011_3_TxFlnk.bed	1	0.602	1	1	1	1	1	0.434	1	0.784	1	0.888	1	1	1	1	0.941	1	0.6	0.94	1	1	1	1	1	0.243	1	0.456	0.908	1	1	1	0.978	1	1	1	0.294	0.846	0.874	0.678	1	1	1	1	0.373	1	1	1	0.363
E011_hESC_Derived_CD184+_Endoderm_Cultured_ES-derived_erc2-chromatin15state-all-files/E011_4_Tx.bed	1	1	0.75	1	1	1	1	0.218	1	0.932	1	0.321	1	1	0.331	1	0.366	1	1	1	0.918	0.824	0.205	1	1	0.639	1	0.0647	1	1	0.484	1	0.13	1	0.754	1	0.00248	0.856	1	1	1	1	1	1	0.207	1	0.685	1	0.624
E011_hESC_Derived_CD184+_Endoderm_Cultured_ES-derived_erc2-chromatin15state-all-files/E011_5_TxWk.bed	1	0.541	1	0.466	1	1	1	8.72e-07	1	0.0334	1	0.0131	1	1	0.893	0.749	0.787	1	1	1	0.0609	1	0.481	1	1	1	1	0.566	0.0755	1	0.283	1	0.292	1	0.692	1	0.00191	0.895	1	1	1	1	1	1	0.0733	0.0207	1	1	1
E011_hESC_Derived_CD184+_Endoderm_Cultured_ES-derived_erc2-chromatin15state-all-files/E011_6_EnhG.bed	1	0.739	1	0.544	1	1	1	0.235	1	1	1	0.312	1	1	0.814	1	1	1	1	1	1	1	1	1	1	0.943	1	1	1	1	0.425	1	0.333	1	0.979	1	0.607	0.98	1	1	1	1	1	1	1	1	1	1	0.611
E011_hESC_Derived_CD184+_Endoderm_Cultured_ES-derived_erc2-chromatin15state-all-files/E011_7_Enh.bed	1	1	1	0.476	1	1	1	0.0958	1	1	1	0.416	1	1	1	0.729	0.76	1	1	1	0.775	1	1	1	0.576	0.257	1	1	0.461	1	1	1	1	1	1	1	0.989	1	0.397	1	1	1	1	1	1	1	0.607	1	0.983
E011_hESC_Derived_CD184+_Endoderm_Cultured_ES-derived_erc2-chromatin15state-all-files/E011_8_ZNF-Rpts.bed	1	1	1	1	1	1	1	0.84	1	0.672	1	1	1	1	0.824	1	1	1	1	1	0.214	1	1	1	1	1	0.645	1	1	1	1	1	1	1	1	1	1	0.742	0.222	1	1	1	1	1	0.69	1	1	1	1
E011_hESC_Derived_CD184+_Endoderm_Cultured_ES-derived_erc2-chromatin15state-all-files/E011_9_Het.bed	1	1	1	1	1	1	0.303	1	1	1	1	1	1	1	1	1	1	1	1	1	1	1	1	1	1	1	1	1	0.986	0.00346	1	1	1	1	0.853	0.851	1	1	0.329	1	1	1	1	1	1	1	1	0.0619	1
E011_hESC_Derived_CD184+_Endoderm_Cultured_ES-derived_erc2-chromatin15state-all-files/E011_10_TssBiv.bed	1	0.616	1	0.2	1	1	1	0.446	1	0.0147	1	0.146	1	1	1	1	0.038	1	1	1	2.95e-05	1	0.122	0.74	0.964	0.651	0.0115	1	0.804	1	0.566	1	1	1	0.658	1	0.278	0.404	1	1	1	0.22	1	0.033	0.108	0.994	1	1	1
E011_hESC_Derived_CD184+_Endoderm_Cultured_ES-derived_erc2-chromatin15state-all-files/E011_11_BivFlnk.bed	0.0842	1	1	1	1	1	1	1	1	1	1	0.434	1	1	1	1	1	1	1	1	0.0372	1	1	1	1	0.67	1	1	1	1	0.181	1	1	1	1	1	0.235	0.709	1	1	0.174	1	1	1	1	1	1	1	1
E011_hESC_Derived_CD184+_Endoderm_Cultured_ES-derived_erc2-chromatin15state-all-files/E011_12_EnhBiv.bed	1	1	1	1	1	1	1	1	1	0.186	1	0.934	1	1	1	1	0.203	1	0.24	1	0.468	1	1	1	1	1	1	1	0.778	1	1	1	1	1	1	1	0.352	0.876	1	0.2	1	1	1	1	1	0.0358	0.971	1	1
E011_hESC_Derived_CD184+_Endoderm_Cultured_ES-derived_erc2-chromatin15state-all-files/E011_13_ReprPC.bed	1	0.511	1	0.218	0.494	1	0.901	1	1	0.644	1	0.259	0.616	1	1	1	0.628	1	0.656	0.66	0.0326	1	0.403	0.235	1	0.98	1	1	1	1	1	0.61	1	0.555	1	0.167	0.0936	0.742	1	0.671	0.724	1	1	1	0.815	0.703	0.684	1	0.398
E011_hESC_Derived_CD184+_Endoderm_Cultured_ES-derived_erc2-chromatin15state-all-files/E011_14_ReprPCWk.bed	0.123	1	1	0.591	1	1	1	1	1	0.65	1	0.453	1	1	0.781	1	0.525	1	1	1	1	1	0.808	1	0.506	0.443	1	1	1	1	0.375	0.00656	1	1	1	1	0.787	0.798	0.781	1	1	1	1	1	1	1	1	1	0.145
E011_hESC_Derived_CD184+_Endoderm_Cultured_ES-derived_erc2-chromatin15state-all-files/E011_15_Quies.bed	1	1	1	1	1	1	1	1	1	1	1	1	1	1	1	1	1	1	1	1	1	1	1	1	1	1	1	1	1	1	1	1	1	1	1	1	1	1	1	1	1	1	1	1	1	1	1	1	1
E012_hESC_Derived_CD56+_Ectoderm_Cultured_ES-derived_erc2-chromatin15state-all-files/E012_1_TssA.bed	1	0.602	0.572	0.0942	1	1	0.874	0.882	1	0.261	1	0.0657	1	1	0.106	0.567	0.434	1	1	0.598	0.0074	1	0.935	1	0.848	1	0.281	1	0.757	1	0.484	1	1	1	0.109	1	0.015	0.0347	0.501	1	0.169	1	1	1	1	0.662	1	1	1
E012_hESC_Derived_CD56+_Ectoderm_Cultured_ES-derived_erc2-chromatin15state-all-files/E012_2_TssAFlnk.bed	1	1	0.913	1	1	1	1	0.611	1	1	1	0.0395	1	1	0.489	0.758	0.97	1	1	0.397	0.839	0.677	0.667	1	1	0.733	1	1	0.947	1	0.745	1	1	1	1	1	1	0.609	1	1	1	1	1	1	0.966	1	0.934	1	0.899
E012_hESC_Derived_CD56+_Ectoderm_Cultured_ES-derived_erc2-chromatin15state-all-files/E012_3_TxFlnk.bed	1	1	1	1	1	1	1	1	1	1	1	1	1	1	1	1	1	1	1	1	1	1	1	1	1	1	1	1	1	1	1	1	1	1	1	1	0.346	1	1	1	1	1	1	1	1	1	1	1	1
E012_hESC_Derived_CD56+_Ectoderm_Cultured_ES-derived_erc2-chromatin15state-all-files/E012_4_Tx.bed	1	1	1	1	1	1	1	0.0497	1	0.991	1	0.324	1	1	0.293	1	1	1	1	1	1	1	1	1	0.767	0.443	1	0.394	0.964	1	0.67	1	0.369	1	0.212	1	0.064	0.499	1	1	1	1	1	1	0.0366	1	1	1	0.609
E012_hESC_Derived_CD56+_Ectoderm_Cultured_ES-derived_erc2-chromatin15state-all-files/E012_5_TxWk.bed	1	1	1	0.986	1	0.92	1	0.000349	1	0.119	0.415	0.0572	1	1	0.781	1	0.663	1	1	1	0.146	1	0.086	1	1	0.241	0.249	0.252	0.233	1	0.692	1	0.834	1	1	1	0.00829	0.887	1	1	1	1	1	1	0.244	0.944	1	1	1
E012_hESC_Derived_CD56+_Ectoderm_Cultured_ES-derived_erc2-chromatin15state-all-files/E012_6_EnhG.bed	1	1	1	1	1	1	1	1	1	1	1	0.155	1	1	1	1	0.621	1	0.5	1	0.781	1	1	0.494	1	0.786	1	1	1	1	1	1	1	1	1	1	1	1	1	0.558	1	1	1	1	1	0.74	1	1	1
E012_hESC_Derived_CD56+_Ectoderm_Cultured_ES-derived_erc2-chromatin15state-all-files/E012_7_Enh.bed	1	0.513	1	0.581	1	1	1	0.0013	1	0.801	0.992	0.241	1	1	0.739	0.908	1	1	1	0.515	0.0234	1	0.327	1	0.798	1	1	1	0.864	1	1	1	1	1	1	1	0.496	1	0.329	1	0.224	1	1	1	0.673	0.424	0.685	1	0.375
E012_hESC_Derived_CD56+_Ectoderm_Cultured_ES-derived_erc2-chromatin15state-all-files/E012_8_ZNF-Rpts.bed	1	1	1	1	1	1	1	1	1	0.847	1	1	1	1	0.33	1	1	1	0.461	1	0.734	1	0.71	1	0.767	1	1	1	1	1	0.698	1	1	1	1	1	0.86	0.877	1	1	1	1	1	1	1	1	1	1	1
E012_hESC_Derived_CD56+_Ectoderm_Cultured_ES-derived_erc2-chromatin15state-all-files/E012_9_Het.bed	1	1	1	1	1	1	1	1	1	1	1	1	1	1	1	1	1	1	1	1	0.661	1	1	1	1	1	1	1	0.931	1	0.808	1	1	1	1	0.865	1	0.731	0.342	1	1	1	1	1	1	1	1	1	1
E012_hESC_Derived_CD56+_Ectoderm_Cultured_ES-derived_erc2-chromatin15state-all-files/E012_10_TssBiv.bed	1	0.124	1	0.266	1	1	1	0.201	1	1	1	0.000785	1	1	1	1	0.0624	1	0.75	1	0.00526	1	0.181	0.759	0.648	1	0.00239	0.566	1	1	0.313	1	1	1	0.274	1	0.0404	0.488	1	0.738	1	0.229	1	0.419	0.369	1	1	1	1
E012_hESC_Derived_CD56+_Ectoderm_Cultured_ES-derived_erc2-chromatin15state-all-files/E012_11_BivFlnk.bed	0.921	1	1	1	1	1	1	1	1	0.641	1	0.232	1	1	1	1	0.0719	1	1	1	0.918	1	1	1	1	0.898	1	1	0.681	1	0.346	1	0.972	1	1	1	0.278	0.518	1	1	1	0.163	1	0.277	1	0.804	0.809	1	0.191
E012_hESC_Derived_CD56+_Ectoderm_Cultured_ES-derived_erc2-chromatin15state-all-files/E012_12_EnhBiv.bed	1	0.636	1	0.159	1	1	1	1	1	0.692	0.459	0.736	1	1	0.45	1	0.161	1	1	1	0.295	1	0.297	0.383	0.915	0.303	1	1	0.961	1	0.873	1	1	1	1	1	0.275	0.0396	0.0406	1	0.442	1	1	0.58	1	0.746	0.411	1	0.543
E012_hESC_Derived_CD56+_Ectoderm_Cultured_ES-derived_erc2-chromatin15state-all-files/E012_13_ReprPC.bed	1	1	1	0.00397	0.35	1	0.221	1	1	0.0804	1	0.305	1	1	1	1	0.583	1	0.465	0.684	0.0197	1	1	1	0.458	0.866	1	1	0.235	1	1	1	0.468	0.993	1	1	0.0877	1	1	0.468	0.268	1	1	0.551	0.481	0.0974	1	1	0.0669
E012_hESC_Derived_CD56+_Ectoderm_Cultured_ES-derived_erc2-chromatin15state-all-files/E012_14_ReprPCWk.bed	0.149	1	1	0.888	0.157	1	1	0.514	1	0.579	0.968	0.463	1	1	0.00468	0.983	0.286	0.0194	1	1	0.933	1	0.744	0.922	0.227	1	0.35	1	0.357	1	0.0466	0.422	1	1	0.217	0.263	0.129	0.0623	1	1	1	1	1	1	0.315	0.183	1	0.864	0.0451
E012_hESC_Derived_CD56+_Ectoderm_Cultured_ES-derived_erc2-chromatin15state-all-files/E012_15_Quies.bed	1	1	1	1	1	1	1	1	1	1	1	1	0.21	1	1	1	1	1	1	1	1	1	1	1	1	1	1	1	1	0.0996	1	1	1	1	1	1	1	1	1	0.868	1	1	1	1	1	1	1	1	1
E013_hESC_Derived_CD56+_Mesoderm_Cultured_ES-derived_erc2-chromatin15state-all-files/E013_1_TssA.bed	1	0.55	1	0.0292	1	1	1	0.101	1	0.644	1	0.0303	1	1	0.154	1	0.133	1	1	0.242	0.000693	1	0.692	1	0.825	0.93	0.0361	1	0.931	1	0.0859	1	1	1	0.186	1	0.000132	0.00218	0.29	1	0.257	1	1	0.25	0.699	0.602	1	1	1
E013_hESC_Derived_CD56+_Mesoderm_Cultured_ES-derived_erc2-chromatin15state-all-files/E013_2_TssAFlnk.bed	1	1	1	1	1	1	1	0.446	1	0.741	1	0.137	1	1	1	1	0.854	1	0.582	0.899	0.674	1	1	0.658	0.999	1	1	0.996	0.354	1	0.0848	1	1	1	1	1	0.82	0.98	1	0.731	1	1	1	1	1	0.976	0.24	1	1
E013_hESC_Derived_CD56+_Mesoderm_Cultured_ES-derived_erc2-chromatin15state-all-files/E013_3_TxFlnk.bed	1	0.977	0.156	1	1	1	1	0.304	1	0.618	0.415	0.00622	1	1	1	0.156	0.0807	1	0.566	0.827	0.191	0.0587	0.394	1	0.205	0.916	1	0.347	1	1	1	1	1	1	0.209	1	0.135	0.945	0.547	0.628	1	1	1	1	0.271	0.902	0.78	1	0.699
E013_hESC_Derived_CD56+_Mesoderm_Cultured_ES-derived_erc2-chromatin15state-all-files/E013_4_Tx.bed	1	1	0.992	1	1	1	1	0.00437	1	0.687	1	0.268	1	1	0.246	1	1	1	1	1	0.0533	0.862	0.257	1	1	0.47	1	0.0811	0.194	1	0.253	1	0.236	1	0.389	1	2.11e-05	0.628	1	1	1	1	1	1	0.00335	1	1	1	1
E013_hESC_Derived_CD56+_Mesoderm_Cultured_ES-derived_erc2-chromatin15state-all-files/E013_5_TxWk.bed	1	1	1	1	1	1	1	0.014	1	0.00809	1	0.00536	1	1	1	0.872	0.166	1	1	1	0.0853	1	0.83	1	0.911	0.761	1	0.0945	0.931	1	0.91	1	0.044	1	0.601	1	0.0435	1	1	1	1	1	1	1	0.773	0.347	1	1	1
E013_hESC_Derived_CD56+_Mesoderm_Cultured_ES-derived_erc2-chromatin15state-all-files/E013_6_EnhG.bed	1	1	1	1	1	1	1	0.0043	1	1	0.996	0.525	1	1	0.27	1	0.00813	1	1	1	0.665	1	0.574	1	0.874	0.106	1	1	0.637	1	0.513	1	1	1	1	1	0.0708	1	1	1	1	1	1	1	0.212	1	0.984	1	0.373
E013_hESC_Derived_CD56+_Mesoderm_Cultured_ES-derived_erc2-chromatin15state-all-files/E013_7_Enh.bed	0.526	1	1	0.0268	1	1	1	0.00749	1	1	1	0.0414	1	1	1	0.444	0.686	1	1	1	0.00074	1	1	1	0.182	0.93	1	1	0.873	1	1	1	1	0.826	1	1	0.0292	0.953	0.483	0.693	0.716	1	1	1	0.521	0.0221	1	1	0.288
E013_hESC_Derived_CD56+_Mesoderm_Cultured_ES-derived_erc2-chromatin15state-all-files/E013_8_ZNF-Rpts.bed	1	1	1	1	1	1	1	0.967	1	1	1	1	1	1	0.88	1	1	1	0.856	1	0.458	1	1	1	1	1	0.301	1	1	1	1	1	1	1	1	1	0.951	0.731	1	1	1	1	1	1	1	0.929	1	1	1
E013_hESC_Derived_CD56+_Mesoderm_Cultured_ES-derived_erc2-chromatin15state-all-files/E013_9_Het.bed	1	1	1	1	1	1	0.214	0.984	1	1	1	1	1	1	1	1	1	1	1	1	1	1	1	1	1	1	1	1	1	0.06	1	1	1	1	1	0.374	1	0.609	0.165	1	1	1	1	1	1	1	1	1	1
E013_hESC_Derived_CD56+_Mesoderm_Cultured_ES-derived_erc2-chromatin15state-all-files/E013_10_TssBiv.bed	1	0.337	1	1	1	1	1	1	1	0.295	1	0.0115	1	1	1	1	0.209	1	1	1	0.0386	1	0.88	1	1	0.896	0.0805	0.888	1	1	1	1	0.939	1	0.476	1	1	1	1	1	1	0.104	1	1	0.63	1	1	1	0.645
E013_hESC_Derived_CD56+_Mesoderm_Cultured_ES-derived_erc2-chromatin15state-all-files/E013_11_BivFlnk.bed	1	1	1	1	1	1	1	1	1	0.0965	1	0.0246	1	1	1	1	0.0326	1	1	1	0.364	1	0.0356	1	1	0.387	1	1	1	1	1	1	1	1	1	1	0.0642	1	1	1	1	1	1	1	1	1	1	1	1
E013_hESC_Derived_CD56+_Mesoderm_Cultured_ES-derived_erc2-chromatin15state-all-files/E013_12_EnhBiv.bed	1	0.0503	1	0.395	1	1	1	1	1	0.111	1	1	1	1	1	1	0.51	1	1	1	0.68	1	0.647	0.452	0.722	1	1	1	0.0843	1	1	1	1	1	1	1	0.72	0.263	1	1	0.174	1	1	1	1	1	1	1	1
E013_hESC_Derived_CD56+_Mesoderm_Cultured_ES-derived_erc2-chromatin15state-all-files/E013_13_ReprPC.bed	1	0.971	1	0.079	1	1	0.422	1	1	0.212	1	0.583	1	1	1	1	0.462	1	0.176	0.162	0.0161	1	0.931	0.192	1	0.67	0.135	1	0.828	1	1	1	1	1	1	1	0.194	0.95	1	0.18	0.0796	1	1	1	0.287	1	1	1	0.242
E013_hESC_Derived_CD56+_Mesoderm_Cultured_ES-derived_erc2-chromatin15state-all-files/E013_14_ReprPCWk.bed	1	1	1	0.377	0.0385	1	0.47	0.889	1	0.778	1	0.298	1	1	0.159	1	1	0.213	1	0.783	1	1	1	1	1	1	1	1	0.173	1	0.478	1	0.937	0.712	1	0.251	1	0.436	0.778	1	0.827	1	1	0.797	0.772	0.347	0.756	0.0346	0.242
E013_hESC_Derived_CD56+_Mesoderm_Cultured_ES-derived_erc2-chromatin15state-all-files/E013_15_Quies.bed	1	0.83	1	1	1	1	1	1	1	1	1	1	0.469	1	1	1	1	1	1	1	1	1	1	1	1	1	1	1	1	1	1	1	1	1	1	1	1	1	1	1	1	1	1	1	1	1	1	1	1
E065_Aorta_Heart_erc2-chromatin15state-all-files/E065_1_TssA.bed	1	0.671	1	0.206	1	1	1	0.433	1	0.647	1	0.000595	1	1	0.159	1	0.00494	1	1	0.478	0.000404	1	0.407	1	0.724	1	0.153	1	0.487	1	0.861	1	1	1	0.183	1	7.78e-06	0.00509	0.37	1	0.0877	1	1	0.291	0.332	0.907	0.411	1	0.847
E065_Aorta_Heart_erc2-chromatin15state-all-files/E065_2_TssAFlnk.bed	1	0.847	1	1	1	1	1	0.122	1	1	0.819	1	1	1	1	1	1	1	1	1	1	1	1	1	1	1	1	1	1	1	0.662	1	1	1	1	0.587	0.334	1	1	1	1	1	1	1	1	1	1	1	1
E065_Aorta_Heart_erc2-chromatin15state-all-files/E065_3_TxFlnk.bed	1	1	1	1	1	1	1	1	1	1	1	0.157	1	1	1	1	1	1	1	1	1	1	1	1	1	1	1	1	1	1	1	1	1	1	1	1	1	1	1	1	1	1	1	1	1	1	1	1	1
E065_Aorta_Heart_erc2-chromatin15state-all-files/E065_4_Tx.bed	1	1	1	1	1	1	1	0.205	1	0.787	1	0.209	1	1	0.154	1	1	1	1	1	0.766	1	0.55	1	0.981	0.86	1	0.395	0.318	0.749	0.889	1	0.229	1	0.739	0.599	0.3	0.33	0.952	1	1	1	1	1	0.366	0.721	0.996	1	0.629
E065_Aorta_Heart_erc2-chromatin15state-all-files/E065_5_TxWk.bed	1	1	1	0.425	1	1	1	1.43e-05	1	0.0199	0.401	0.0251	1	1	1	1	0.0027	1	1	1	1.4e-05	1	0.22	1	0.8	1	1	1	0.311	1	0.136	1	0.468	1	1	1	4.73e-18	1	1	1	1	1	1	1	0.000771	0.738	0.808	1	1
E065_Aorta_Heart_erc2-chromatin15state-all-files/E065_6_EnhG.bed	1	1	1	1	1	1	1	1	1	0.705	1	0.776	1	1	1	1	0.102	1	0.597	1	1	1	1	1	0.957	1	1	0.804	1	1	1	1	1	1	0.637	1	0.346	0.713	1	0.64	1	1	1	1	1	1	1	1	1
E065_Aorta_Heart_erc2-chromatin15state-all-files/E065_7_Enh.bed	1	1	1	0.396	1	1	1	0.131	1	1	1	0.0276	1	1	1	1	1	1	1	0.941	0.0888	1	0.636	1	0.926	1	1	0.61	1	1	0.871	1	1	1	1	1	0.000407	0.799	0.603	1	1	1	1	1	0.383	1	0.425	1	0.109
E065_Aorta_Heart_erc2-chromatin15state-all-files/E065_8_ZNF-Rpts.bed	1	1	1	1	1	1	1	1	1	1	1	1	1	1	1	1	1	1	1	1	0.737	1	1	1	1	0.504	1	1	1	1	0.871	1	1	1	1	1	0.955	0.457	0.809	1	1	1	1	1	1	1	1	1	1
E065_Aorta_Heart_erc2-chromatin15state-all-files/E065_9_Het.bed	1	1	1	1	1	1	0.181	1	1	1	1	1	1	1	0.277	1	1	1	1	1	1	1	1	1	1	1	1	1	1	0.0134	1	0.947	1	0.147	1	0.00241	1	1	0.0651	1	0.237	1	1	1	1	1	1	0.0337	1
E065_Aorta_Heart_erc2-chromatin15state-all-files/E065_10_TssBiv.bed	1	1	1	1	1	1	1	1	1	0.439	1	1	1	1	1	1	0.205	1	1	1	1	1	0.343	1	1	0.299	1	1	1	1	1	1	1	1	1	1	1	1	1	1	1	0.0442	1	1	1	1	1	1	1
E065_Aorta_Heart_erc2-chromatin15state-all-files/E065_11_BivFlnk.bed	1	1	1	1	1	1	1	1	1	1	1	1	1	1	1	1	1	1	1	1	1	1	1	1	1	1	1	1	1	1	1	1	1	1	1	1	1	1	1	1	1	1	1	1	1	1	1	1	1
E065_Aorta_Heart_erc2-chromatin15state-all-files/E065_12_EnhBiv.bed	1	1	1	1	1	1	1	1	1	1	1	1	1	1	1	1	1	1	1	1	0.0081	1	1	1	1	1	1	1	1	1	1	1	1	1	1	1	1	1	1	1	1	1	1	1	1	1	1	1	1
E065_Aorta_Heart_erc2-chromatin15state-all-files/E065_13_ReprPC.bed	1	1	1	1	1	1	1	1	1	1	1	0.724	1	1	1	1	1	1	1	1	0.962	1	0.937	1	0.00385	1	1	1	1	1	1	1	1	1	1	1	1	0.165	1	1	1	1	1	1	1	0.887	1	1	0.668
E065_Aorta_Heart_erc2-chromatin15state-all-files/E065_14_ReprPCWk.bed	1	1	1	0.0935	0.00535	1	0.265	1	1	1	1	0.789	1	1	0.416	1	0.965	1	0.834	0.251	0.766	1	1	0.603	1	0.599	0.469	1	1	1	1	1	1	1	0.483	0.62	1	0.818	1	0.744	0.758	1	1	1	1	0.00343	1	1	0.6
E065_Aorta_Heart_erc2-chromatin15state-all-files/E065_15_Quies.bed	1	0.55	1	1	1	1	1	1	1	1	1	1	0.556	0.328	1	1	1	1	1	1	1	1	1	1	1	0.922	0.537	1	1	1	1	1	1	1	1	1	1	1	1	1	1	1	1	1	1	1	1	1	1
E083_Fetal_Heart_Heart_erc2-chromatin15state-all-files/E083_1_TssA.bed	1	1	1	0.283	1	1	1	0.0126	1	0.682	1	0.029	1	1	0.184	1	0.000455	1	1	1	0.564	1	0.636	1	0.555	1	0.982	1	0.864	1	1	1	1	1	0.272	1	0.157	0.0391	0.0839	1	1	1	1	1	0.912	0.683	1	1	1
E083_Fetal_Heart_Heart_erc2-chromatin15state-all-files/E083_2_TssAFlnk.bed	1	1	0.557	1	1	1	1	1	1	1	0.939	0.714	1	1	1	0.568	0.077	1	1	0.941	0.114	1	1	1	0.566	0.99	1	1	0.931	1	0.86	1	1	1	1	1	0.137	0.511	1	1	1	1	1	1	1	1	0.846	1	0.527
E083_Fetal_Heart_Heart_erc2-chromatin15state-all-files/E083_3_TxFlnk.bed	1	1	1	1	1	1	1	1	1	1	1	1	1	1	1	1	0.243	1	1	1	1	1	1	1	1	1	1	1	1	1	1	1	1	1	1	1	1	1	1	1	1	1	1	1	1	1	1	1	1
E083_Fetal_Heart_Heart_erc2-chromatin15state-all-files/E083_4_Tx.bed	1	1	1	1	1	1	1	1	1	1	1	1	1	1	1	1	0.922	1	1	1	1	1	1	1	1	1	1	1	1	1	1	1	0.897	1	1	1	0.771	1	1	1	1	1	1	1	1	1	0.819	1	1
E083_Fetal_Heart_Heart_erc2-chromatin15state-all-files/E083_5_TxWk.bed	1	1	1	0.72	1	1	1	0.0223	1	0.0165	1	0.299	1	1	0.249	1	0.229	1	1	1	0.000777	1	0.843	1	1	0.98	0.283	0.0418	0.648	1	0.778	1	0.186	1	0.292	1	1.9e-05	0.544	1	1	1	1	1	1	0.525	1	1	1	1
E083_Fetal_Heart_Heart_erc2-chromatin15state-all-files/E083_6_EnhG.bed	1	1	1	1	1	1	1	1	1	1	1	0.978	1	1	1	1	0.0848	1	1	1	1	1	0.699	1	1	0.642	1	1	1	1	0.745	1	0.0759	1	0.718	1	0.205	1	1	1	1	1	1	1	1	1	0.971	1	1
E083_Fetal_Heart_Heart_erc2-chromatin15state-all-files/E083_7_Enh.bed	1	1	1	0.104	1	1	1	9.11e-05	1	1	1	0.0593	1	1	0.517	1	2.97e-09	1	1	1	0.0048	1	0.984	1	1	0.598	1	1	0.0613	1	0.135	1	1	1	1	0.524	3.21e-06	1	0.895	1	1	1	1	1	0.000159	1	1.02e-05	1	0.0258
E083_Fetal_Heart_Heart_erc2-chromatin15state-all-files/E083_8_ZNF-Rpts.bed	1	1	1	1	1	1	1	1	1	1	1	1	1	1	1	1	0.713	1	1	1	0.113	1	1	1	0.884	1	0.534	1	1	1	1	0.924	1	1	1	1	0.986	0.946	1	1	1	1	1	1	1	1	1	1	1
E083_Fetal_Heart_Heart_erc2-chromatin15state-all-files/E083_9_Het.bed	1	1	1	1	1	1	1	1	1	1	1	0.89	1	1	1	1	1	1	0.507	1	1	1	1	1	1	1	1	1	1	1	0.209	1	1	1	1	1	1	1	1	1	1	1	1	1	1	1	1	1	1
E083_Fetal_Heart_Heart_erc2-chromatin15state-all-files/E083_10_TssBiv.bed	1	1	1	1	1	1	1	1	1	1	1	1	1	1	1	1	1	1	1	1	1	1	1	1	1	1	1	1	1	1	1	1	1	1	1	1	1	1	1	1	1	1	1	0.0626	1	1	1	1	1
E083_Fetal_Heart_Heart_erc2-chromatin15state-all-files/E083_11_BivFlnk.bed	1	1	1	1	1	1	1	1	1	1	1	1	1	1	1	1	1	1	1	1	1	1	1	1	0.458	1	1	1	1	1	1	1	1	1	1	1	1	1	1	1	1	1	1	1	0.268	1	0.59	1	1
E083_Fetal_Heart_Heart_erc2-chromatin15state-all-files/E083_12_EnhBiv.bed	1	0.584	1	0.22	1	1	0.201	1	1	0.21	1	0.788	1	1	1	1	0.824	1	0.743	0.871	0.0337	1	0.263	1	1	0.198	0.996	0.984	0.729	1	1	1	1	1	0.613	1	0.0318	0.143	1	0.628	0.228	1	1	0.00232	1	1	1	1	0.758
E083_Fetal_Heart_Heart_erc2-chromatin15state-all-files/E083_13_ReprPC.bed	0.872	0.176	1	0.0206	1	1	0.222	1	1	0.254	1	0.0189	1	1	1	1	1	1	0.404	0.256	0.0766	1	0.259	0.196	0.448	1	0.868	1	1	1	0.861	1	1	1	1	1	0.309	0.281	1	0.405	0.769	1	1	1	1	0.406	1	1	0.714
E083_Fetal_Heart_Heart_erc2-chromatin15state-all-files/E083_14_ReprPCWk.bed	0.177	1	1	0.791	1	1	0.302	1	1	1	0.939	0.176	1	0.638	0.0361	1	1	0.0987	1	0.409	1	1	1	1	0.645	0.443	0.661	1	0.443	1	0.198	0.793	1	0.301	1	0.562	1	0.187	1	1	0.00202	1	1	0.693	1	0.000227	1	1	0.457
E083_Fetal_Heart_Heart_erc2-chromatin15state-all-files/E083_15_Quies.bed	1	0.922	1	1	1	1	1	1	1	1	1	1	0.141	1	1	1	1	1	1	1	1	1	1	1	1	1	1	1	1	0.032	1	1	1	1	1	1	1	1	1	1	1	1	1	1	1	1	1	0.304	1
E095_Left_Ventricle_Heart_erc2-chromatin15state-all-files/E095_1_TssA.bed	1	0.55	1	0.144	1	1	0.906	0.000573	1	0.612	0.892	0.00485	1	1	0.275	1	6.77e-05	1	1	0.2	0.000374	1	0.437	1	0.592	1	0.126	1	0.903	1	0.511	1	1	1	0.146	1	0.00146	0.0407	0.46	1	0.187	1	1	1	0.237	1	0.756	1	1
E095_Left_Ventricle_Heart_erc2-chromatin15state-all-files/E095_2_TssAFlnk.bed	1	1	0.156	0.89	1	1	1	0.0656	1	0.474	1	0.219	1	1	0.209	0.156	1	1	1	0.393	0.586	0.603	0.403	1	0.713	1	1	1	0.425	1	0.141	1	1	1	1	1	0.484	0.119	1	1	1	1	1	1	0.419	1	0.281	1	1
E095_Left_Ventricle_Heart_erc2-chromatin15state-all-files/E095_3_TxFlnk.bed	1	1	1	1	1	1	1	1	1	1	1	0.0411	1	1	1	1	0.0526	1	1	1	1	1	1	1	1	1	1	1	1	1	1	1	1	1	1	1	0.00387	1	1	1	1	1	1	0.155	1	1	1	1	0.397
E095_Left_Ventricle_Heart_erc2-chromatin15state-all-files/E095_4_Tx.bed	1	1	1	1	1	1	1	0.886	1	0.994	1	0.321	1	1	0.228	1	0.633	1	1	1	1	1	0.243	1	0.781	0.859	1	0.32	0.181	1	0.745	1	0.044	1	0.405	0.91	0.00364	1	1	1	1	1	1	1	0.541	1	1	1	0.855
E095_Left_Ventricle_Heart_erc2-chromatin15state-all-files/E095_5_TxWk.bed	1	1	1	1	0.78	1	1	0.00172	1	0.0101	0.574	0.487	1	1	1	1	0.0198	1	0.876	1	0.000231	1	0.568	1	0.911	0.211	0.783	0.359	1	1	0.745	1	0.624	1	0.79	1	1.45e-11	0.961	1	1	1	1	1	1	0.072	1	0.765	1	1
E095_Left_Ventricle_Heart_erc2-chromatin15state-all-files/E095_6_EnhG.bed	1	1	1	1	1	1	1	0.389	1	0.882	1	0.346	1	1	1	1	0.946	1	1	1	0.0775	1	1	1	0.915	0.141	1	1	1	1	0.746	1	1	1	1	0.434	1	0.723	0.417	1	1	1	1	1	1	0.929	0.708	1	1
E095_Left_Ventricle_Heart_erc2-chromatin15state-all-files/E095_7_Enh.bed	1	1	1	0.0318	1	1	1	6.35e-05	1	0.807	1	0.0108	1	1	0.105	0.844	0.00035	1	1	1	0.147	1	1	1	0.0894	0.39	1	0.834	0.0577	1	0.501	1	0.606	0.968	0.567	0.0787	0.0662	1	0.0443	1	0.47	1	1	1	4.25e-05	0.973	0.383	1	0.0134
E095_Left_Ventricle_Heart_erc2-chromatin15state-all-files/E095_8_ZNF-Rpts.bed	1	1	1	1	1	1	1	0.876	1	1	1	1	1	1	1	1	1	1	1	1	0.266	1	1	1	0.978	0.953	0.902	0.866	1	1	0.491	1	1	1	0.693	1	1	0.778	1	1	1	1	1	1	1	1	1	1	0.774
E095_Left_Ventricle_Heart_erc2-chromatin15state-all-files/E095_9_Het.bed	1	1	1	1	1	1	0.466	1	1	1	1	1	1	1	0.408	1	1	1	1	1	1	1	1	1	1	1	1	1	1	0.893	1	1	1	1	1	0.614	1	0.698	0.408	1	0.067	1	1	1	1	1	1	1	1
E095_Left_Ventricle_Heart_erc2-chromatin15state-all-files/E095_10_TssBiv.bed	0.638	0.647	1	1	1	1	1	1	1	1	1	0.341	1	1	1	1	0.107	1	1	1	0.555	1	1	1	1	0.609	1	1	1	1	1	1	1	1	1	1	0.0473	0.154	1	1	1	0.142	1	0.19	1	0.542	1	1	1
E095_Left_Ventricle_Heart_erc2-chromatin15state-all-files/E095_11_BivFlnk.bed	1	1	1	1	1	1	1	1	1	1	1	0.26	1	1	1	1	1	1	1	1	0.414	1	1	1	1	0.446	1	0.497	1	1	1	1	1	1	0.245	1	0.456	1	1	1	1	1	1	1	1	1	1	1	1
E095_Left_Ventricle_Heart_erc2-chromatin15state-all-files/E095_12_EnhBiv.bed	0.841	0.943	1	1	1	1	0.539	0.539	1	0.977	0.867	0.554	1	1	1	1	0.589	1	1	1	0.00526	1	1	1	0.767	1	1	1	1	1	0.695	1	1	1	1	1	0.412	0.0357	1	1	1	1	1	0.00712	1	1	1	1	0.149
E095_Left_Ventricle_Heart_erc2-chromatin15state-all-files/E095_13_ReprPC.bed	1	0.782	1	0.00574	1	1	1	1	1	0.612	1	0.0893	1	1	0.771	1	1	1	0.116	1	0.583	0.921	0.701	0.11	1	1	0.982	1	0.575	1	1	1	1	1	1	1	0.239	0.665	1	0.102	0.0231	1	1	1	1	0.00852	1	1	0.968
E095_Left_Ventricle_Heart_erc2-chromatin15state-all-files/E095_14_ReprPCWk.bed	0.213	1	1	0.562	1	0.728	0.162	1	1	1	1	0.936	1	1	0.45	1	1	1	1	0.219	1	1	1	0.55	1	1	1	1	1	0.00924	0.916	0.793	1	1	1	0.388	1	0.876	1	1	0.724	1	1	0.902	1	0.738	1	0.0183	0.49
E095_Left_Ventricle_Heart_erc2-chromatin15state-all-files/E095_15_Quies.bed	1	0.729	1	1	1	1	1	1	1	1	1	1	0.0694	1	1	1	1	1	1	1	1	1	1	1	1	1	0.5	1	1	1	1	1	1	1	1	1	1	1	0.958	1	1	1	1	1	1	1	1	1	1
E104_Right_Atrium_Heart_erc2-chromatin15state-all-files/E104_1_TssA.bed	1	0.629	1	0.32	1	1	1	0.0603	1	0.364	1	0.00131	1	1	0.349	1	0.00402	1	1	0.093	0.00278	1	0.601	1	0.466	0.642	0.153	1	1	1	0.778	1	1	1	0.103	1	0.000173	0.0552	1	1	0.47	0.251	1	0.411	0.203	0.902	0.297	1	0.758
E104_Right_Atrium_Heart_erc2-chromatin15state-all-files/E104_2_TssAFlnk.bed	1	1	0.762	0.934	1	1	1	0.0156	1	1	1	0.244	1	1	1	0.63	0.543	1	0.856	1	1	1	1	1	0.738	1	1	0.556	0.891	1	0.374	1	1	1	1	1	0.00253	0.576	1	0.893	1	1	1	0.446	0.428	1	0.604	1	1
E104_Right_Atrium_Heart_erc2-chromatin15state-all-files/E104_3_TxFlnk.bed	1	0.201	1	0.519	1	1	1	1	1	0.395	1	0.0239	1	1	1	1	0.0597	1	1	0.683	0.0797	1	0.98	1	1	1	1	1	0.0109	1	0.106	1	0.939	1	1	1	0.163	0.431	0.107	1	0.0811	1	1	1	0.655	0.769	1	1	0.169
E104_Right_Atrium_Heart_erc2-chromatin15state-all-files/E104_4_Tx.bed	1	1	1	1	1	1	1	0.602	1	1	1	1	1	1	0.121	1	1	1	1	1	1	1	1	1	1	1	1	1	1	1	1	1	1	1	1	1	1	0.817	1	1	1	1	1	1	0.537	1	1	1	1
E104_Right_Atrium_Heart_erc2-chromatin15state-all-files/E104_5_TxWk.bed	1	1	0.59	0.0272	0.0161	1	1	0.000276	1	0.0965	0.000671	0.000584	1	0.932	0.00849	1	0.0355	0.513	1	1	2.45e-05	0.885	0.556	0.866	0.213	0.0354	1	0.0988	0.001	1	0.00568	1	0.00373	1	0.109	1	2.99e-06	0.62	0.776	1	1	1	1	1	0.0351	0.00948	0.883	1	0.0224
E104_Right_Atrium_Heart_erc2-chromatin15state-all-files/E104_6_EnhG.bed	0.683	1	1	1	1	1	1	0.465	1	0.825	1	0.464	1	1	1	1	0.517	0.0864	1	1	0.705	1	1	1	0.672	1	1	0.608	0.011	1	1	1	1	1	0.0877	1	0.767	0.298	1	1	1	1	1	1	0.46	1	1	1	1
E104_Right_Atrium_Heart_erc2-chromatin15state-all-files/E104_7_Enh.bed	1	1	1	0.916	1	1	1	0.000349	1	1	1	0.037	1	1	0.4	0.425	0.0526	1	1	1	0.019	1	0.925	1	0.462	0.357	1	0.456	0.675	1	0.425	1	0.216	1	1	0.0623	0.000453	0.911	0.506	1	0.794	1	1	1	5.7e-05	1	0.479	1	0.0676
E104_Right_Atrium_Heart_erc2-chromatin15state-all-files/E104_8_ZNF-Rpts.bed	1	1	1	0.408	1	1	1	1	1	1	1	1	1	1	1	1	1	1	1	1	0.178	1	0.664	1	1	1	1	1	1	1	0.61	1	1	1	1	1	0.724	0.689	1	1	1	1	1	1	1	1	1	1	1
E104_Right_Atrium_Heart_erc2-chromatin15state-all-files/E104_9_Het.bed	1	1	1	1	1	1	0.956	1	1	1	1	1	1	1	1	1	1	1	1	1	1	1	1	1	1	1	1	1	1	1	1	1	1	1	1	0.402	1	0.477	0.81	1	1	1	1	1	1	1	1	1	1
E104_Right_Atrium_Heart_erc2-chromatin15state-all-files/E104_10_TssBiv.bed	1	1	1	1	1	1	1	1	1	1	1	1	1	1	1	1	1	1	1	1	1	1	1	1	1	1	1	1	1	1	1	1	1	1	1	1	1	0.161	1	1	1	1	1	1	1	1	1	1	1
E104_Right_Atrium_Heart_erc2-chromatin15state-all-files/E104_11_BivFlnk.bed	1	1	1	1	1	1	1	1	1	1	1	1	1	1	1	1	1	1	1	1	1	1	1	1	1	0.0332	1	1	1	1	1	1	1	1	1	1	1	1	1	1	1	1	1	1	1	1	1	1	1
E104_Right_Atrium_Heart_erc2-chromatin15state-all-files/E104_12_EnhBiv.bed	1	1	1	1	1	1	1	1	1	1	1	1	1	1	1	1	1	1	1	1	0.0952	1	1	1	1	1	1	1	1	1	1	1	1	1	1	1	1	1	1	1	1	1	1	1	1	1	1	1	1
E104_Right_Atrium_Heart_erc2-chromatin15state-all-files/E104_13_ReprPC.bed	0.653	1	1	0.115	1	1	1	1	1	1	1	0.2	1	1	1	1	1	1	1	1	1	1	1	1	1	1	0.176	1	1	1	1	1	1	1	1	1	1	0.909	1	1	1	1	1	1	1	1	1	1	1
E104_Right_Atrium_Heart_erc2-chromatin15state-all-files/E104_14_ReprPCWk.bed	0.303	0.76	1	0.935	1	1	0.62	1	1	1	1	0.569	1	1	0.44	1	1	1	1	1	1	1	0.808	0.383	0.592	1	0.254	1	1	1	0.796	1	1	1	1	0.791	1	0.665	1	1	1	1	1	1	1	0.183	1	1	1
E104_Right_Atrium_Heart_erc2-chromatin15state-all-files/E104_15_Quies.bed	1	0.729	1	1	1	1	1	1	1	1	1	1	0.398	1	1	1	1	1	1	1	1	1	1	1	1	1	1	1	1	1	1	0.656	1	1	1	1	1	1	1	1	1	1	1	1	1	1	1	1	1
E105_Right_Ventricle_Heart_erc2-chromatin15state-all-files/E105_1_TssA.bed	1	0.287	1	0.0997	1	1	1	0.0359	1	0.488	0.486	0.00117	1	1	0.513	1	0.000112	1	1	0.899	0.0067	1	0.302	1	0.747	1	0.0884	1	0.741	1	0.371	1	1	1	0.203	1	0.00352	0.0163	0.383	1	0.284	1	1	1	0.199	0.431	0.411	1	0.88
E105_Right_Ventricle_Heart_erc2-chromatin15state-all-files/E105_2_TssAFlnk.bed	1	1	0.917	1	1	1	1	0.212	1	0.561	0.96	0.0915	1	1	0.232	0.823	0.399	1	1	0.249	0.0415	0.612	1	1	0.916	1	0.874	1	0.306	1	0.313	1	1	1	0.819	1	7.86e-05	0.0701	1	1	1	0.0267	1	0.609	0.624	1	0.411	1	0.292
E105_Right_Ventricle_Heart_erc2-chromatin15state-all-files/E105_3_TxFlnk.bed	1	1	1	1	1	1	1	1	1	1	1	0.312	1	1	1	1	1	1	0.404	1	1	1	1	1	1	1	1	1	1	1	0.145	1	1	1	1	0.997	0.221	1	1	0.41	1	1	1	1	1	1	1	1	0.454
E105_Right_Ventricle_Heart_erc2-chromatin15state-all-files/E105_4_Tx.bed	1	1	1	1	0.494	1	1	0.0948	1	1	1	0.287	1	1	0.283	1	0.892	1	1	1	1	1	0.413	1	0.645	0.757	1	0.0965	0.755	1	0.243	1	0.21	1	0.183	0.726	0.0192	0.553	0.51	1	1	1	1	1	0.999	1	0.835	1	0.976
E105_Right_Ventricle_Heart_erc2-chromatin15state-all-files/E105_5_TxWk.bed	1	1	1	0.523	1	1	1	0.00273	1	0.0372	0.807	0.206	1	1	0.441	1	0.0268	1	0.497	1	0.000182	1	0.086	1	0.394	0.175	1	0.594	0.75	1	0.82	1	0.172	1	0.284	1	2.37e-06	0.942	1	0.628	1	1	1	1	0.0166	0.823	0.993	1	1
E105_Right_Ventricle_Heart_erc2-chromatin15state-all-files/E105_6_EnhG.bed	1	1	1	1	1	1	1	0.0159	1	0.611	0.986	1	1	1	1	0.881	0.311	1	1	1	0.147	0.709	1	1	0.974	0.864	1	1	0.3	1	0.818	1	0.236	1	1	1	0.315	0.335	1	1	1	1	1	1	0.0628	0.78	0.659	1	0.909
E105_Right_Ventricle_Heart_erc2-chromatin15state-all-files/E105_7_Enh.bed	0.589	1	1	0.098	1	1	1	0.000288	1	0.506	1	0.0726	1	1	0.145	0.63	0.00122	1	1	1	0.0167	1	0.739	1	0.551	0.588	1	0.75	0.0584	1	0.465	1	0.895	0.712	1	0.0291	0.000278	1	0.0454	1	1	1	0.767	0.908	0.0404	0.67	0.664	1	0.0224
E105_Right_Ventricle_Heart_erc2-chromatin15state-all-files/E105_8_ZNF-Rpts.bed	1	1	1	1	1	1	1	1	1	1	1	1	1	1	1	1	1	1	1	1	0.671	1	1	1	1	1	1	1	1	1	1	1	1	1	1	1	1	0.799	1	1	1	1	1	1	1	1	1	1	1
E105_Right_Ventricle_Heart_erc2-chromatin15state-all-files/E105_9_Het.bed	1	1	1	1	1	1	1	1	1	1	1	0.899	1	1	1	1	1	1	1	1	0.301	1	1	1	1	1	1	1	1	1	0.779	1	1	1	1	1	1	0.117	0.504	1	0.724	1	1	1	1	1	1	1	1
E105_Right_Ventricle_Heart_erc2-chromatin15state-all-files/E105_10_TssBiv.bed	1	0.576	1	1	1	1	1	1	1	0.614	1	1	1	1	1	1	1	1	0.442	1	0.395	1	1	0.03	1	1	1	1	1	1	0.357	1	1	1	1	1	1	1	1	0.306	0.0718	1	1	1	1	1	1	1	1
E105_Right_Ventricle_Heart_erc2-chromatin15state-all-files/E105_11_BivFlnk.bed	1	1	1	1	1	1	1	0.274	1	1	1	0.0326	1	1	1	1	0.333	1	1	1	1	1	1	1	1	0.484	1	0.483	1	1	1	1	1	1	0.203	1	1	0.454	1	1	1	1	1	1	1	1	1	1	1
E105_Right_Ventricle_Heart_erc2-chromatin15state-all-files/E105_12_EnhBiv.bed	1	1	1	0.351	1	1	1	1	1	1	1	0.405	1	1	1	1	1	1	1	1	0.184	1	1	1	0.0206	0.621	1	1	1	1	1	1	1	1	1	1	0.241	0.693	1	1	1	1	1	1	1	1	1	1	1
E105_Right_Ventricle_Heart_erc2-chromatin15state-all-files/E105_13_ReprPC.bed	1	1	1	0.688	1	1	0.505	1	1	0.203	0.968	0.0386	1	1	1	1	1	1	0.461	1	1	1	0.72	1	1	1	0.497	1	1	1	1	1	1	0.993	1	0.869	1	0.223	1	0.437	0.518	1	1	1	1	0.0218	1	1	0.0987
E105_Right_Ventricle_Heart_erc2-chromatin15state-all-files/E105_14_ReprPCWk.bed	0.196	1	1	1	1	0.997	0.658	1	1	1	1	1	1	0.00863	0.00168	1	1	1	1	1	1	0.282	1	1	0.98	1	1	1	0.572	1	1	0.981	1	1	0.695	0.145	1	0.248	0.448	1	0.344	1	1	0.266	1	0.769	1	0.00645	0.998
E105_Right_Ventricle_Heart_erc2-chromatin15state-all-files/E105_15_Quies.bed	1	0.296	1	1	1	1	1	1	1	1	1	1	0.0431	1	1	1	1	1	1	1	1	1	1	1	1	1	0.765	1	1	0.317	1	1	1	1	1	1	1	1	1	1	1	1	1	1	1	1	1	1	1
E018_iPS-15b_iPSC_erc2-chromatin15state-all-files/E018_1_TssA.bed	1	0.219	1	0.145	1	1	0.92	0.0155	1	0.0147	0.935	0.0802	1	0.847	0.139	1	0.796	1	1	0.399	0.0938	1	0.654	1	0.974	1	0.151	1	0.122	0.996	0.206	1	1	1	0.157	1	0.00305	0.0913	0.256	1	0.229	1	1	1	0.647	0.782	0.492	1	0.758
E018_iPS-15b_iPSC_erc2-chromatin15state-all-files/E018_2_TssAFlnk.bed	1	1	1	1	1	1	1	0.14	1	1	1	0.376	1	1	1	1	0.847	1	1	0.3	0.499	1	1	1	0.316	1	1	1	1	1	0.808	1	1	1	1	1	0.956	0.631	1	1	1	1	1	1	0.368	0.973	0.709	1	1
E018_iPS-15b_iPSC_erc2-chromatin15state-all-files/E018_3_TxFlnk.bed	1	1	0.535	1	1	1	1	1	1	0.765	1	0.435	1	1	1	0.456	0.473	1	1	1	0.614	0.392	1	1	1	0.159	1	1	1	1	0.589	1	1	1	1	1	0.257	0.71	1	1	1	1	1	1	1	1	1	1	0.472
E018_iPS-15b_iPSC_erc2-chromatin15state-all-files/E018_4_Tx.bed	1	1	0.557	1	1	1	1	0.0906	1	0.988	1	0.1	1	1	0.0974	1	1	1	1	1	0.734	0.607	0.086	1	0.729	0.598	1	0.0363	0.361	1	0.315	1	0.22	1	0.107	0.687	0.077	0.117	1	1	1	1	1	1	0.0428	0.427	1	1	0.682
E018_iPS-15b_iPSC_erc2-chromatin15state-all-files/E018_5_TxWk.bed	1	1	1	1	1	1	1	0.00824	1	0.211	0.793	0.0852	1	1	0.746	1	0.254	1	1	1	0.0368	1	0.629	1	0.999	1	0.429	0.984	0.0588	1	0.771	1	0.24	1	1	1	0.0213	0.761	0.703	1	1	1	1	1	0.242	1	0.997	1	1
E018_iPS-15b_iPSC_erc2-chromatin15state-all-files/E018_6_EnhG.bed	1	1	1	1	1	1	1	1	1	1	1	0.217	1	1	1	1	1	1	0.535	1	0.923	1	0.912	1	1	0.873	1	0.832	1	1	0.13	1	1	1	1	1	0.539	0.91	1	0.558	1	1	1	1	0.627	1	1	1	1
E018_iPS-15b_iPSC_erc2-chromatin15state-all-files/E018_7_Enh.bed	1	0.8	1	0.207	1	1	1	0.000166	1	0.405	0.939	0.0804	1	1	1	1	1	1	1	1	0.875	1	1	1	0.641	0.443	1	1	1	1	1	1	1	1	1	1	1	0.933	1	1	1	1	1	1	0.599	1	0.78	1	0.603
E018_iPS-15b_iPSC_erc2-chromatin15state-all-files/E018_8_ZNF-Rpts.bed	1	1	1	1	1	1	1	1	1	1	1	1	1	1	1	1	1	1	1	1	0.845	1	1	1	0.372	1	1	1	1	1	0.815	1	1	1	1	1	1	1	1	1	1	1	1	1	1	1	1	1	1
E018_iPS-15b_iPSC_erc2-chromatin15state-all-files/E018_9_Het.bed	1	1	1	1	1	1	1	1	1	1	1	1	1	1	1	1	1	1	1	1	1	1	1	1	1	1	1	1	1	0.528	1	1	1	1	1	0.622	1	1	0.287	1	0.831	1	1	1	1	1	1	1	1
E018_iPS-15b_iPSC_erc2-chromatin15state-all-files/E018_10_TssBiv.bed	0.939	0.382	0.992	0.00353	1	1	1	1	1	0.00784	1	0.00448	1	1	0.331	0.88	0.00206	1	0.163	1	6.5e-08	1	0.261	0.391	1	0.797	0.00239	1	1	1	0.463	1	1	1	0.434	1	0.00219	0.263	1	0.114	0.0209	0.0317	1	0.00872	0.178	1	1	1	0.149
E018_iPS-15b_iPSC_erc2-chromatin15state-all-files/E018_11_BivFlnk.bed	1	0.729	1	0.935	1	1	1	1	1	0.935	1	0.969	1	1	1	1	0.517	1	0.823	0.995	0.548	1	0.699	1	0.391	0.143	1	1	0.891	1	1	1	1	1	0.736	1	1	0.129	1	0.781	1	1	1	1	1	1	1	1	1
E018_iPS-15b_iPSC_erc2-chromatin15state-all-files/E018_12_EnhBiv.bed	1	1	1	0.589	1	1	1	1	1	1	1	0.0652	1	1	0.603	1	0.439	1	1	1	0.869	1	0.986	1	0.978	1	1	1	1	1	0.681	1	1	1	0.955	1	0.84	1	1	1	1	1	1	1	1	0.238	1	1	1
E018_iPS-15b_iPSC_erc2-chromatin15state-all-files/E018_13_ReprPC.bed	1	1	1	0.3	0.396	1	0.386	0.984	1	0.226	1	0.239	1	1	1	1	0.863	1	1	0.308	0.872	1	1	0.658	0.826	1	1	1	0.729	1	0.836	1	1	0.147	1	0.152	0.422	1	1	1	0.949	1	1	0.19	1	0.0569	0.852	1	0.527
E018_iPS-15b_iPSC_erc2-chromatin15state-all-files/E018_14_ReprPCWk.bed	0.303	1	1	0.835	1	0.266	1	0.828	1	1	0.939	1	1	1	0.00596	1	0.517	0.042	1	1	1	1	0.983	1	0.927	1	1	1	0.756	1	0.0885	0.31	1	1	1	0.529	0.886	1	1	1	0.367	1	1	1	0.54	0.857	1	1	0.654
E018_iPS-15b_iPSC_erc2-chromatin15state-all-files/E018_15_Quies.bed	1	1	1	1	1	1	1	1	1	1	1	1	0.172	1	1	1	1	1	1	1	1	1	1	1	1	1	1	1	1	1	1	1	1	1	1	1	1	1	1	0.9	1	1	1	1	1	1	1	1	1
E019_iPS-18_iPSC_erc2-chromatin15state-all-files/E019_1_TssA.bed	1	0.859	0.535	0.0882	1	1	0.788	0.0298	1	0.00481	1	0.0584	1	0.652	0.0888	0.488	0.616	1	1	1	0.158	0.994	0.437	1	1	1	0.164	1	0.491	1	0.169	1	1	1	0.107	1	0.0654	0.0546	0.147	1	0.169	1	1	1	0.783	0.657	1	1	1
E019_iPS-18_iPSC_erc2-chromatin15state-all-files/E019_2_TssAFlnk.bed	1	0.636	1	1	1	1	1	0.107	1	1	1	0.363	1	1	0.922	1	1	1	1	0.16	0.742	0.932	1	1	0.722	0.356	1	0.577	0.83	1	1	1	1	1	1	1	0.806	0.673	1	1	0.862	1	1	1	0.882	0.738	0.78	1	1
E019_iPS-18_iPSC_erc2-chromatin15state-all-files/E019_3_TxFlnk.bed	1	0.847	1	1	1	1	1	0.654	1	0.0317	1	0.177	1	1	1	1	0.605	1	1	1	1	1	0.714	1	1	0.054	1	1	1	1	1	1	1	1	0.475	1	0.867	0.86	1	1	1	1	1	1	0.598	1	1	1	1
E019_iPS-18_iPSC_erc2-chromatin15state-all-files/E019_4_Tx.bed	1	1	1	1	1	1	1	0.931	1	1	1	0.414	1	1	0.76	1	1	1	1	1	1	1	0.326	1	1	0.825	1	0.0488	1	1	0.863	1	0.239	1	0.44	1	0.00849	0.301	1	1	1	1	1	1	0.429	1	1	1	0.677
E019_iPS-18_iPSC_erc2-chromatin15state-all-files/E019_5_TxWk.bed	1	0.826	1	0.702	1	1	1	0.000123	1	0.00481	0.194	0.028	1	1	0.516	1	0.198	1	1	1	0.0406	1	0.0613	1	0.757	0.787	0.255	0.69	0.188	1	1	1	0.182	1	0.542	1	0.00506	1	1	1	1	1	1	1	0.0417	0.917	1	1	1
E019_iPS-18_iPSC_erc2-chromatin15state-all-files/E019_6_EnhG.bed	1	1	1	0.751	1	1	1	1	1	1	1	0.0479	1	1	1	1	1	1	1	1	0.679	1	1	1	1	0.986	0.908	0.964	1	1	0.587	1	1	1	1	1	0.411	1	1	1	1	1	1	1	1	1	1	1	0.798
E019_iPS-18_iPSC_erc2-chromatin15state-all-files/E019_7_Enh.bed	1	1	1	0.206	1	1	1	0.14	1	0.605	1	0.299	1	1	1	0.91	1	1	1	1	0.845	1	1	1	0.956	1	1	1	1	1	1	1	1	1	1	1	1	1	0.671	1	1	1	1	1	0.78	0.346	0.425	1	0.332
E019_iPS-18_iPSC_erc2-chromatin15state-all-files/E019_8_ZNF-Rpts.bed	1	1	1	1	1	1	1	1	1	1	1	1	1	1	1	1	1	1	1	1	1	1	0.562	1	0.999	1	1	1	1	1	0.562	1	1	1	0.698	1	1	1	0.923	1	1	1	1	1	1	1	1	1	1
E019_iPS-18_iPSC_erc2-chromatin15state-all-files/E019_9_Het.bed	1	1	1	1	1	1	1	1	1	1	1	1	1	1	1	1	1	1	1	1	1	1	1	1	1	1	1	1	1	0.00196	1	1	1	1	1	1	1	1	0.0828	1	1	1	1	1	1	1	1	0.000216	1
E019_iPS-18_iPSC_erc2-chromatin15state-all-files/E019_10_TssBiv.bed	1	0.48	1	0.981	1	1	1	0.736	1	1	0.838	0.00256	1	1	1	1	0.0434	1	1	1	6.74e-05	1	0.471	0.296	0.426	0.599	0.0841	1	0.986	1	0.805	1	1	1	0.307	1	0.131	0.0906	1	1	0.336	0.0174	1	0.549	0.534	1	1	1	0.49
E019_iPS-18_iPSC_erc2-chromatin15state-all-files/E019_11_BivFlnk.bed	1	0.379	0.722	0.986	1	1	1	1	1	0.226	1	1	1	1	1	0.649	0.0263	1	0.876	1	0.00284	1	0.403	1	1	0.773	0.793	1	1	1	0.43	1	1	1	1	1	0.0641	0.0821	1	0.818	0.429	1	1	0.577	0.99	0.25	1	1	1
E019_iPS-18_iPSC_erc2-chromatin15state-all-files/E019_12_EnhBiv.bed	0.644	0.847	1	0.0882	1	1	1	1	1	0.805	1	0.0131	1	1	0.687	1	0.465	1	1	1	1	1	0.685	1	0.426	0.934	1	1	1	1	0.989	1	1	1	1	0.655	0.631	0.951	0.984	1	0.73	1	1	0.733	1	1	0.743	1	1
E019_iPS-18_iPSC_erc2-chromatin15state-all-files/E019_13_ReprPC.bed	1	1	1	0.0502	0.351	1	0.497	1	1	0.386	1	0.249	1	0.894	1	1	0.205	1	0.232	0.372	0.0756	1	0.941	1	0.958	1	1	1	0.604	1	0.755	1	0.85	0.991	1	0.858	0.0686	1	0.952	0.232	0.791	1	1	0.144	0.7	0.0221	1	1	0.135
E019_iPS-18_iPSC_erc2-chromatin15state-all-files/E019_14_ReprPCWk.bed	0.85	1	1	0.342	0.126	1	1	0.0601	1	0.506	1	0.137	1	0.925	0.385	1	1	0.0182	1	1	0.618	1	1	0.0623	0.665	1	0.536	1	0.107	1	0.276	0.952	0.984	0.301	0.157	1	0.988	0.206	1	1	0.709	1	1	1	0.0796	0.296	0.872	1	0.191
E019_iPS-18_iPSC_erc2-chromatin15state-all-files/E019_15_Quies.bed	1	1	1	1	1	1	0.812	1	1	1	1	1	0.205	1	1	1	1	1	1	1	1	1	1	1	1	1	1	1	1	1	1	1	1	1	1	0.644	1	0.96	1	1	1	1	1	1	1	1	1	1	1
E020_iPS-20b_iPSC_erc2-chromatin15state-all-files/E020_1_TssA.bed	1	0.822	1	0.0622	1	1	0.614	0.0403	1	0.0457	0.141	0.0455	1	0.876	0.181	1	0.793	1	1	0.376	0.367	1	0.863	1	0.975	0.907	0.0858	1	0.225	1	0.0661	1	1	1	0.162	1	0.0521	0.0648	0.725	1	0.287	1	1	1	0.95	0.579	0.756	1	1
E020_iPS-20b_iPSC_erc2-chromatin15state-all-files/E020_2_TssAFlnk.bed	1	0.823	1	1	1	1	1	1	1	0.971	1	0.477	1	1	0.993	1	1	1	1	0.899	0.152	1	1	1	0.56	1	1	0.984	1	1	1	1	1	1	1	0.381	0.938	0.713	1	1	1	1	1	1	1	1	1	1	1
E020_iPS-20b_iPSC_erc2-chromatin15state-all-files/E020_3_TxFlnk.bed	1	1	0.154	1	1	1	1	0.335	1	1	1	0.794	1	1	1	0.156	0.791	1	1	1	0.958	0.612	0.913	1	1	0.0318	0.72	0.347	1	1	1	1	1	1	0.242	1	0.694	0.989	1	1	1	1	1	1	0.766	1	1	1	1
E020_iPS-20b_iPSC_erc2-chromatin15state-all-files/E020_4_Tx.bed	1	1	1	1	1	1	1	0.408	1	1	1	0.423	1	1	0.233	1	1	1	1	1	1	1	0.205	1	1	0.417	1	0.0363	0.964	1	0.977	1	0.308	1	0.612	1	0.077	0.518	1	1	1	1	1	1	0.338	1	1	1	1
E020_iPS-20b_iPSC_erc2-chromatin15state-all-files/E020_5_TxWk.bed	1	1	1	0.704	1	1	1	1.01e-07	1	0.00428	0.716	0.0303	1	1	1	1	0.102	1	1	0.569	0.000509	1	0.162	1	0.83	0.802	0.625	0.456	0.421	1	0.406	1	0.151	1	0.598	1	0.00352	1	1	1	1	1	1	1	0.00531	0.504	0.835	1	1
E020_iPS-20b_iPSC_erc2-chromatin15state-all-files/E020_6_EnhG.bed	1	1	1	0.862	1	1	1	0.473	1	0.897	1	0.228	1	1	1	1	0.971	1	0.658	1	1	1	1	1	1	1	1	1	1	1	1	1	1	1	1	1	0.345	0.911	1	0.784	1	1	1	1	0.876	1	1	1	1
E020_iPS-20b_iPSC_erc2-chromatin15state-all-files/E020_7_Enh.bed	1	1	1	0.615	1	1	1	0.159	1	0.185	1	0.141	1	1	1	1	1	1	1	1	0.949	1	1	1	1	1	1	1	1	1	1	1	1	1	1	1	0.767	0.912	0.925	1	1	1	1	1	0.99	0.946	0.765	1	0.649
E020_iPS-20b_iPSC_erc2-chromatin15state-all-files/E020_8_ZNF-Rpts.bed	1	1	1	1	1	1	0.701	1	1	1	1	1	1	1	0.816	1	1	1	1	1	0.189	1	1	1	1	1	1	1	1	1	1	1	1	1	1	1	0.862	1	1	1	1	1	1	1	1	1	1	1	1
E020_iPS-20b_iPSC_erc2-chromatin15state-all-files/E020_9_Het.bed	1	1	1	1	1	1	0.162	1	1	0.775	1	1	1	1	0.864	1	1	1	1	1	1	1	1	1	1	1	1	1	1	1.08e-07	1	1	1	1	0.693	0.868	1	0.951	0.0521	1	0.696	1	1	1	1	1	1	8.51e-07	1
E020_iPS-20b_iPSC_erc2-chromatin15state-all-files/E020_10_TssBiv.bed	1	0.072	1	0.521	1	1	1	0.982	1	0.436	1	0.00367	1	1	1	1	0.0355	1	1	0.598	0.00381	1	0.377	1	0.915	0.446	0.0425	1	0.604	1	0.208	1	1	1	0.915	1	0.0761	0.0484	1	1	0.0811	0.0267	1	0.0814	0.689	1	0.71	1	1
E020_iPS-20b_iPSC_erc2-chromatin15state-all-files/E020_11_BivFlnk.bed	0.416	1	1	0.909	1	1	1	1	1	0.579	1	0.943	1	1	0.363	1	0.189	1	0.781	1	0.00994	1	0.636	1	1	1	1	1	1	1	1	1	1	1	1	1	0.0975	0.277	1	0.752	1	1	1	0.475	1	0.578	1	1	1
E020_iPS-20b_iPSC_erc2-chromatin15state-all-files/E020_12_EnhBiv.bed	1	1	1	1	0.458	1	1	1	1	0.65	1	0.371	1	1	1	1	0.621	1	1	1	0.734	1	1	1	0.537	0.073	1	1	1	1	0.852	1	1	1	0.814	0.425	0.882	0.989	1	1	0.111	1	1	1	1	0.347	0.641	1	0.967
E020_iPS-20b_iPSC_erc2-chromatin15state-all-files/E020_13_ReprPC.bed	1	1	1	0.00353	1	1	0.501	0.84	1	0.653	1	0.103	1	1	0.815	1	0.166	1	0.288	1	0.0841	1	1	0.256	0.601	1	1	1	0.307	1	1	1	0.909	1	1	0.644	0.449	1	1	0.275	1	1	1	0.155	0.584	0.0341	1	1	0.0451
E020_iPS-20b_iPSC_erc2-chromatin15state-all-files/E020_14_ReprPCWk.bed	0.379	1	1	1	0.176	0.939	0.698	0.356	1	1	0.683	0.938	1	1	0.0408	1	0.47	0.141	1	0.902	0.924	1	0.68	0.227	0.562	1	1	1	0.236	1	0.0842	0.208	1	1	0.506	1	0.294	0.637	0.316	1	0.178	1	1	1	0.237	0.614	1	1	0.45
E020_iPS-20b_iPSC_erc2-chromatin15state-all-files/E020_15_Quies.bed	1	1	1	1	1	1	1	1	1	1	1	1	0.157	1	1	1	1	1	1	1	1	1	1	1	1	1	1	1	1	1	1	1	1	1	1	1	1	1	1	1	1	1	1	1	1	1	1	1	1
E021_iPS_DF_6.9_iPSC_erc2-chromatin15state-all-files/E021_1_TssA.bed	1	0.28	0.59	0.0502	1	1	0.788	0.215	1	0.176	1	0.00274	1	1	0.0423	0.488	0.463	1	1	0.692	0.0073	1	0.559	1	0.458	1	0.00239	1	0.184	1	0.243	1	1	1	0.0571	1	0.126	0.00482	0.324	1	0.133	1	1	1	0.541	1	0.461	1	0.687
E021_iPS_DF_6.9_iPSC_erc2-chromatin15state-all-files/E021_2_TssAFlnk.bed	1	1	1	1	1	1	1	0.155	1	1	0.2	0.487	1	1	0.105	1	1	1	1	1	0.0814	1	1	1	1	1	1	1	1	1	1	1	0.745	1	1	1	0.13	1	1	1	1	1	1	1	1	0.729	1	1	1
E021_iPS_DF_6.9_iPSC_erc2-chromatin15state-all-files/E021_3_TxFlnk.bed	1	1	1	1	1	1	1	1	1	1	1	0.121	1	1	1	1	0.0112	1	1	1	1	1	1	1	1	1	1	1	1	1	1	1	1	1	1	1	1	1	1	1	1	1	1	1	1	1	1	1	1
E021_iPS_DF_6.9_iPSC_erc2-chromatin15state-all-files/E021_4_Tx.bed	1	1	0.487	1	1	1	1	0.294	1	0.907	1	0.0804	1	1	0.251	0.844	1	1	1	1	0.466	0.403	0.343	1	0.706	0.874	1	0.0363	0.662	1	0.705	1	0.906	1	0.0568	0.923	0.0466	0.0811	1	1	1	1	1	1	0.373	1	1	1	0.454
E021_iPS_DF_6.9_iPSC_erc2-chromatin15state-all-files/E021_5_TxWk.bed	1	1	1	0.698	1	1	0.656	0.000443	1	0.59	0.812	0.0305	1	1	0.00697	1	0.625	1	1	1	0.557	1	0.233	1	1	1	0.838	0.487	0.0739	1	0.406	1	0.232	1	0.777	1	0.000949	0.572	1	1	0.856	1	1	1	0.0172	0.74	1	1	1
E021_iPS_DF_6.9_iPSC_erc2-chromatin15state-all-files/E021_6_EnhG.bed	1	1	1	1	1	1	1	0.514	1	1	1	0.472	1	1	1	1	0.592	1	1	1	1	1	1	1	1	0.0533	1	1	1	1	1	1	1	1	1	1	0.798	0.791	1	1	1	1	1	1	1	1	1	1	0.118
E021_iPS_DF_6.9_iPSC_erc2-chromatin15state-all-files/E021_7_Enh.bed	1	1	0.657	0.882	1	1	1	0.00256	1	0.641	1	0.0971	1	1	1	0.425	0.726	1	1	0.251	0.44	1	0.937	1	0.755	1	1	1	0.318	1	0.77	1	1	1	0.745	1	1	1	0.958	1	1	1	1	1	0.153	0.406	0.607	1	0.457
E021_iPS_DF_6.9_iPSC_erc2-chromatin15state-all-files/E021_8_ZNF-Rpts.bed	1	1	1	1	1	1	1	1	1	1	1	1	1	1	1	1	1	1	1	1	0.284	1	0.739	1	0.757	1	0.496	1	1	1	1	1	1	1	1	0.726	1	1	1	1	1	1	1	1	1	1	1	1	1
E021_iPS_DF_6.9_iPSC_erc2-chromatin15state-all-files/E021_9_Het.bed	1	1	1	1	1	1	1	1	1	1	1	1	1	1	1	1	1	1	1	1	1	1	1	1	1	1	1	1	1	0.214	1	1	1	1	1	0.152	1	0.628	0.0377	1	1	1	1	1	1	1	1	1	1
E021_iPS_DF_6.9_iPSC_erc2-chromatin15state-all-files/E021_10_TssBiv.bed	1	1	1	1	1	1	1	0.229	1	0.65	0.968	0.0157	1	1	1	1	0.235	1	1	1	0.0117	1	0.386	0.603	0.856	0.908	1	1	1	1	0.806	1	1	1	1	1	0.238	0.0132	1	1	0.00773	1	1	0.013	0.197	1	1	1	1
E021_iPS_DF_6.9_iPSC_erc2-chromatin15state-all-files/E021_11_BivFlnk.bed	1	1	1	1	1	1	1	1	1	0.0504	1	1	1	1	1	1	0.0126	1	1	1	0.548	1	1	1	1	0.598	0.865	1	1	1	0.425	1	1	1	1	1	0.579	0.58	1	1	1	1	1	1	1	0.466	1	1	1
E021_iPS_DF_6.9_iPSC_erc2-chromatin15state-all-files/E021_12_EnhBiv.bed	0.919	1	1	0.183	1	1	1	1	1	0.185	1	0.726	1	1	1	1	0.0898	1	0.661	1	0.258	1	1	0.14	0.927	0.93	1	1	1	1	1	1	0.934	1	0.564	1	1	0.932	1	0.62	0.212	0.104	1	0.439	1	1	1	1	1
E021_iPS_DF_6.9_iPSC_erc2-chromatin15state-all-files/E021_13_ReprPC.bed	1	0.382	1	0.00353	1	1	0.854	1	1	1	1	0.357	1	1	1	1	0.021	1	0.176	0.365	0.0319	1	0.259	1	0.727	0.918	0.454	1	0.814	1	1	1	1	1	1	1	0.00115	1	1	0.184	0.252	1	1	1	1	0.78	1	1	0.25
E021_iPS_DF_6.9_iPSC_erc2-chromatin15state-all-files/E021_14_ReprPCWk.bed	0.621	1	1	0.183	1	1	0.589	0.522	1	0.226	0.962	0.479	1	0.936	1	1	0.982	1	1	0.93	0.637	1	0.845	0.434	1	0.719	1	1	0.803	1	0.136	1	0.54	0.147	1	0.414	0.989	0.94	1	1	0.73	1	1	1	0.797	1	1	1	0.454
E021_iPS_DF_6.9_iPSC_erc2-chromatin15state-all-files/E021_15_Quies.bed	0.864	0.604	1	1	1	1	1	1	1	1	1	1	0.277	1	1	1	1	1	1	1	1	1	1	1	1	1	1	1	1	1	1	1	1	1	1	1	1	1	1	1	1	1	1	1	1	1	1	1	1
E022_iPS_DF_19.11_iPSC_erc2-chromatin15state-all-files/E022_1_TssA.bed	1	0.301	1	0.203	1	1	1	0.443	1	0.612	0.968	0.161	1	1	0.0361	1	0.338	1	1	1	0.0323	1	0.597	1	0.768	1	0.116	1	0.712	1	0.251	1	1	1	0.183	1	0.539	0.00819	0.29	1	0.566	1	1	1	0.705	1	0.859	1	0.9
E022_iPS_DF_19.11_iPSC_erc2-chromatin15state-all-files/E022_2_TssAFlnk.bed	0.706	1	0.71	1	1	1	0.759	0.00385	1	0.092	0.812	0.0381	1	1	0.201	0.568	1	1	1	0.372	0.375	1	1	1	0.381	0.49	0.141	1	0.465	1	0.402	1	0.658	1	0.739	1	0.334	0.837	1	1	0.0224	1	1	1	0.963	1	0.992	1	1
E022_iPS_DF_19.11_iPSC_erc2-chromatin15state-all-files/E022_3_TxFlnk.bed	1	1	0.1	0.531	1	1	1	0.842	1	0.741	1	0.246	1	1	1	0.0878	0.0754	1	0.507	1	0.00602	0.282	1	1	1	0.995	0.38	1	0.698	1	0.0276	1	0.987	1	0.468	1	0.000331	0.0524	1	0.507	1	0.128	1	1	0.245	0.78	0.78	1	0.735
E022_iPS_DF_19.11_iPSC_erc2-chromatin15state-all-files/E022_4_Tx.bed	1	1	1	1	1	1	1	1	1	1	1	0.0448	1	1	0.105	1	1	1	1	1	0.766	0.824	0.379	1	0.729	1	1	0.32	1	1	0.808	1	0.406	1	0.109	1	1	0.06	1	1	1	1	1	1	0.797	0.41	1	1	0.795
E022_iPS_DF_19.11_iPSC_erc2-chromatin15state-all-files/E022_5_TxWk.bed	1	1	1	1	1	1	1	0.0022	1	1	0.705	0.08	1	0.42	0.0361	1	0.909	1	1	1	0.933	1	1	1	0.911	1	1	0.984	0.622	1	0.0638	1	0.315	1	0.909	0.418	0.0606	0.827	0.0651	1	1	1	1	1	0.00397	0.735	1	1	1
E022_iPS_DF_19.11_iPSC_erc2-chromatin15state-all-files/E022_6_EnhG.bed	1	1	1	1	1	1	1	0.307	1	0.752	0.812	0.00455	1	1	0.0136	0.425	1	0.331	1	0.905	0.00465	0.504	1	1	0.462	1	0.982	0.456	0.000778	1	1	1	0.633	1	0.521	0.677	0.01	0.00516	0.00838	1	1	1	1	1	0.287	0.00419	0.78	1	0.000326
E022_iPS_DF_19.11_iPSC_erc2-chromatin15state-all-files/E022_7_Enh.bed	1	1	1	0.589	1	1	0.688	0.00254	0.857	0.897	1	0.0369	1	1	0.192	1	0.721	0.971	1	0.929	0.367	1	0.979	1	0.131	0.695	1	1	0.275	1	0.409	1	0.848	0.278	1	0.658	0.367	0.511	0.17	1	0.0214	1	1	0.336	0.181	0.827	0.414	1	0.132
E022_iPS_DF_19.11_iPSC_erc2-chromatin15state-all-files/E022_8_ZNF-Rpts.bed	1	1	1	1	1	1	0.783	0.931	1	1	1	1	1	1	0.0588	1	0.904	1	1	1	1	1	1	1	0.838	1	1	1	0.0956	1	0.692	1	1	1	1	0.915	0.388	0.229	0.778	1	1	1	1	1	1	1	1	1	0.929
E022_iPS_DF_19.11_iPSC_erc2-chromatin15state-all-files/E022_9_Het.bed	1	1	1	1	1	1	1	1	1	1	1	1	1	1	1	1	1	1	1	1	1	1	1	1	1	1	1	1	1	1	1	0.952	1	1	1	0.145	1	0.496	0.0999	1	0.111	1	1	1	1	1	1	1	1
E022_iPS_DF_19.11_iPSC_erc2-chromatin15state-all-files/E022_10_TssBiv.bed	1	1	1	1	1	1	1	1	1	0.228	0.711	0.057	1	1	1	1	1	1	1	1	1	1	1	1	1	1	1	1	0.421	1	1	1	1	1	1	1	0.644	0.602	1	1	0.134	1	1	1	1	1	1	1	1
E022_iPS_DF_19.11_iPSC_erc2-chromatin15state-all-files/E022_11_BivFlnk.bed	1	1	1	0.606	1	1	1	0.931	1	0.263	1	0.00926	1	1	1	1	0.00171	1	1	1	0.0114	1	0.248	0.624	0.911	0.214	0.99	1	1	1	0.876	1	1	1	0.552	1	0.418	0.0357	1	1	1	0.0905	1	0.0012	0.786	0.888	1	1	0.756
E022_iPS_DF_19.11_iPSC_erc2-chromatin15state-all-files/E022_12_EnhBiv.bed	0.526	0.892	1	0.0338	1	1	0.814	1	1	1	0.725	0.58	1	1	1	1	0.519	1	0.29	0.995	0.024	1	1	0.256	0.722	1	0.5	1	0.854	1	1	1	1	1	1	1	0.0529	1	1	0.295	0.31	1	1	1	0.923	1	1	1	0.14
E022_iPS_DF_19.11_iPSC_erc2-chromatin15state-all-files/E022_13_ReprPC.bed	1	1	1	0.0235	1	1	1	1	1	0.957	1	0.479	1	1	1	1	0.0027	1	0.352	0.175	0.0908	1	0.343	1	0.72	1	1	1	0.589	1	1	1	1	1	1	1	0.0378	1	1	0.41	1	1	1	1	1	0.489	1	1	1
E022_iPS_DF_19.11_iPSC_erc2-chromatin15state-all-files/E022_14_ReprPCWk.bed	0.683	1	1	0.784	1	1	0.265	0.522	1	0.479	1	0.595	1	1	1	1	1	1	1	0.44	0.666	1	0.912	1	1	0.949	1	1	0.891	1	0.311	1	1	1	0.942	0.976	0.997	0.693	1	1	0.547	1	1	1	1	0.346	1	1	0.725
E022_iPS_DF_19.11_iPSC_erc2-chromatin15state-all-files/E022_15_Quies.bed	1	0.00323	1	1	1	1	1	1	1	0.0715	1	1	0.0303	1	1	1	1	1	0.314	1	1	1	1	1	1	1	1	1	1	1	1	1	1	1	1	1	1	1	1	0.533	1	1	1	1	1	1	1	1	1
E086_Fetal_Kidney_Kidney_erc2-chromatin15state-all-files/E086_1_TssA.bed	1	1	1	0.0135	1	1	1	0.0555	1	0.204	0.705	0.00455	1	1	0.154	1	0.0383	1	1	1	0.00443	1	0.371	1	0.466	1	0.076	1	0.953	1	0.569	1	0.906	1	0.0459	1	0.0135	0.0477	0.277	1	0.237	1	1	1	1	0.359	0.602	1	1
E086_Fetal_Kidney_Kidney_erc2-chromatin15state-all-files/E086_2_TssAFlnk.bed	1	0.938	0.395	1	1	1	1	0.197	1	1	1	0.23	1	1	1	0.345	1	1	0.859	0.256	1	0.824	1	1	0.972	1	1	0.715	0.723	1	0.978	1	1	1	1	1	1	0.688	1	0.966	1	1	1	1	0.628	1	1	1	1
E086_Fetal_Kidney_Kidney_erc2-chromatin15state-all-files/E086_3_TxFlnk.bed	1	1	1	1	1	1	1	1	1	1	1	1	1	1	1	1	0.309	1	0.281	0.324	1	1	1	1	1	0.442	1	1	1	1	1	1	1	1	1	1	0.426	1	1	0.306	1	1	1	1	1	1	1	1	1
E086_Fetal_Kidney_Kidney_erc2-chromatin15state-all-files/E086_4_Tx.bed	1	1	1	1	1	1	1	0.576	1	1	1	1	1	1	1	1	0.941	1	1	1	1	1	0.812	1	1	1	1	1	1	1	1	1	0.468	1	0.609	1	1	0.877	1	1	1	1	1	1	0.521	1	1	1	1
E086_Fetal_Kidney_Kidney_erc2-chromatin15state-all-files/E086_5_TxWk.bed	1	1	1	0.116	1	1	1	0.00144	1	0.198	0.676	0.0336	1	1	0.824	1	0.417	1	1	1	0.0036	1	0.22	1	0.848	0.274	0.874	0.0815	0.275	1	0.237	1	0.0298	1	0.711	1	6.72e-14	0.921	1	1	1	1	1	1	0.219	1	1	1	0.496
E086_Fetal_Kidney_Kidney_erc2-chromatin15state-all-files/E086_6_EnhG.bed	1	1	1	0.659	1	1	1	1	1	0.982	1	1	1	1	1	1	1	1	1	1	0.447	1	1	1	1	0.334	1	1	1	1	0.874	1	0.842	1	1	1	1	1	1	1	0.435	1	1	1	0.194	0.856	1	1	1
E086_Fetal_Kidney_Kidney_erc2-chromatin15state-all-files/E086_7_Enh.bed	1	1	1	0.000248	1	1	1	0.359	1	0.928	1	0.00474	1	1	0.324	1	1	1	1	1	0.00235	1	0.925	1	0.407	0.394	1	0.521	1	1	0.944	1	1	1	0.858	1	0.382	0.527	0.396	1	0.762	1	1	1	0.411	0.74	1	1	0.0435
E086_Fetal_Kidney_Kidney_erc2-chromatin15state-all-files/E086_8_ZNF-Rpts.bed	1	1	1	1	1	1	1	1	1	1	1	0.853	1	1	1	1	1	1	0.572	1	1	1	1	1	0.997	1	0.464	1	0.772	1	0.968	1	1	1	1	1	1	1	1	1	1	1	1	1	1	1	1	1	1
E086_Fetal_Kidney_Kidney_erc2-chromatin15state-all-files/E086_9_Het.bed	1	1	1	1	1	1	1	1	1	0.935	1	1	1	1	1	1	1	1	1	1	0.764	1	1	1	1	1	1	0.866	1	1	1	1	0.99	1	1	0.265	1	0.156	0.261	1	1	1	1	1	1	1	1	1	1
E086_Fetal_Kidney_Kidney_erc2-chromatin15state-all-files/E086_10_TssBiv.bed	0.906	1	1	0.562	1	1	1	1	1	1	1	0.0219	1	1	1	1	1	1	1	1	0.00447	1	0.407	1	1	1	1	1	1	1	0.819	1	1	1	1	1	0.101	0.921	1	1	1	1	1	0.013	0.655	1	0.78	1	0.654
E086_Fetal_Kidney_Kidney_erc2-chromatin15state-all-files/E086_11_BivFlnk.bed	0.511	1	1	1	1	1	1	1	1	0.154	1	1	1	1	1	1	1	1	1	1	0.416	1	0.54	1	1	1	1	1	0.424	1	0.0886	1	1	1	1	1	0.121	0.605	1	1	1	1	1	1	1	1	1	1	1
E086_Fetal_Kidney_Kidney_erc2-chromatin15state-all-files/E086_12_EnhBiv.bed	1	1	1	0.115	1	1	1	1	1	0.524	1	1	1	1	1	1	1	1	1	1	0.823	1	1	1	1	1	1	1	1	1	1	1	1	1	1	0.937	1	1	1	1	1	1	1	0.25	1	1	1	1	1
E086_Fetal_Kidney_Kidney_erc2-chromatin15state-all-files/E086_13_ReprPC.bed	1	0.0861	1	0.188	1	1	0.905	1	1	0.684	1	0.52	1	1	1	1	0.409	1	0.439	0.816	0.302	1	0.604	0.00178	1	0.971	0.485	1	1	1	1	1	1	1	1	1	0.72	0.503	0.816	0.383	0.266	1	0.511	1	0.689	0.19	1	1	1
E086_Fetal_Kidney_Kidney_erc2-chromatin15state-all-files/E086_14_ReprPCWk.bed	1	1	1	1	0.286	0.912	0.698	1	1	1	1	0.983	1	0.15	0.605	1	0.875	1	1	0.315	1	1	1	1	1	1	1	1	0.575	1	0.961	0.905	1	0.0283	1	1	1	1	0.0164	1	0.442	1	1	0.927	1	0.474	1	1	1
E086_Fetal_Kidney_Kidney_erc2-chromatin15state-all-files/E086_15_Quies.bed	1	1	1	1	1	1	1	1	1	1	1	1	0.214	1	1	1	1	1	1	1	1	1	1	1	1	1	1	1	1	0.0407	1	1	1	1	1	1	1	1	1	1	1	1	1	1	1	1	1	0.486	1
E066_Liver_Liver_erc2-chromatin15state-all-files/E066_1_TssA.bed	1	1	1	0.114	1	1	1	0.545	1	0.573	0.519	0.19	1	1	0.279	1	0.229	1	1	1	0.00373	1	0.444	1	0.372	0.978	0.567	0.834	0.589	0.164	0.264	1	1	1	0.157	1	0.831	0.00218	0.509	1	0.762	1	1	1	0.936	1	1	1	0.234
E066_Liver_Liver_erc2-chromatin15state-all-files/E066_2_TssAFlnk.bed	1	1	0.313	1	1	1	1	0.0861	1	0.176	1	0.09	1	1	1	0.389	0.733	1	1	0.274	0.287	0.0902	1	1	0.68	1	1	0.0363	0.34	1	0.268	1	0.101	1	0.628	1	0.00185	0.58	1	1	1	0.198	1	0.334	0.797	0.981	0.78	1	0.905
E066_Liver_Liver_erc2-chromatin15state-all-files/E066_3_TxFlnk.bed	1	1	1	0.342	0.302	1	1	1	1	0.807	1	0.0251	1	1	1	1	1	1	0.461	1	0.764	1	1	1	1	1	1	0.206	1	1	1	1	0.205	0.584	0.12	1	0.304	1	1	0.437	1	1	1	1	1	1	1	1	0.493
E066_Liver_Liver_erc2-chromatin15state-all-files/E066_4_Tx.bed	1	1	1	0.639	1	1	1	0.201	1	0.741	1	1	1	1	0.598	1	1	1	1	0.719	0.907	1	0.22	1	0.708	1	1	0.312	0.318	8e-07	0.889	1	0.182	0.752	0.269	1	0.0378	0.723	1	1	1	1	1	1	0.802	1	1	1.21e-06	0.476
E066_Liver_Liver_erc2-chromatin15state-all-files/E066_5_TxWk.bed	0.344	0.718	1	0.688	1	1	1	0.0266	1	0.116	0.717	0.0184	1	1	0.971	1	0.0219	1	1	1	0.00306	1	0.252	1	0.785	0.358	1	0.888	0.518	0.304	0.325	1	0.176	1	0.886	1	0.000106	0.98	0.811	1	1	1	1	1	0.0274	1	1	1	0.816
E066_Liver_Liver_erc2-chromatin15state-all-files/E066_6_EnhG.bed	1	1	1	1	1	1	0.999	0.277	1	1	1	0.625	1	1	1	1	1	1	1	1	0.753	0.951	1	1	0.915	0.134	1	0.457	0.712	0.778	0.379	1	0.91	1	0.127	1	1	0.64	1	1	1	1	1	1	0.48	1	0.992	1	0.0224
E066_Liver_Liver_erc2-chromatin15state-all-files/E066_7_Enh.bed	1	1	0.75	0.00353	1	1	1	5.1e-05	1	0.778	0.122	0.0749	1	1	0.745	0.57	0.336	1	1	0.993	0.00526	1	1	1	0.122	0.224	1	1.28e-05	0.14	1	0.342	0.61	0.000327	1	0.167	1	0.261	0.808	0.552	1	1	1	1	1	0.00291	1	1	1	0.486
E066_Liver_Liver_erc2-chromatin15state-all-files/E066_8_ZNF-Rpts.bed	1	1	1	1	1	1	1	1	1	0.989	1	1	1	1	1	1	1	1	1	1	0.575	1	1	1	0.962	1	1	1	1	1	0.96	1	1	1	1	1	1	0.849	0.722	1	1	1	1	1	1	1	1	1	1
E066_Liver_Liver_erc2-chromatin15state-all-files/E066_9_Het.bed	1	1	1	1	1	1	1	1	1	1	1	1	1	1	0.934	1	1	1	1	1	1	1	1	1	1	1	1	1	1	1	1	1	1	1	1	0.587	1	0.953	0.0769	1	0.73	1	1	0.811	1	1	1	1	1
E066_Liver_Liver_erc2-chromatin15state-all-files/E066_10_TssBiv.bed	1	1	1	1	1	1	1	1	1	1	1	1	1	1	1	1	0.201	1	1	1	1	1	1	1	1	1	1	1	1	1	1	1	1	1	1	1	1	1	1	1	1	1	1	1	1	1	1	1	1
E066_Liver_Liver_erc2-chromatin15state-all-files/E066_11_BivFlnk.bed	1	1	1	1	1	1	1	0.231	1	1	1	0.0234	1	1	1	1	1	1	1	1	1	1	0.394	1	1	1	0.569	1	1	1	1	1	1	1	0.29	1	0.062	0.385	1	1	1	1	1	1	0.239	0.376	1	1	1
E066_Liver_Liver_erc2-chromatin15state-all-files/E066_12_EnhBiv.bed	1	0.36	1	1	1	1	1	0.736	1	0.296	0.96	0.0166	1	1	1	1	0.681	1	1	1	0.0111	1	1	0.553	1	1	0.0986	1	1	1	1	1	1	1	1	1	0.0071	0.195	1	1	1	1	1	1	0.636	1	1	1	0.648
E066_Liver_Liver_erc2-chromatin15state-all-files/E066_13_ReprPC.bed	1	0.219	1	0.0164	1	1	1	1	1	0.36	1	0.715	1	1	1	1	0.318	1	0.461	1	0.515	1	0.343	0.526	0.999	0.642	1	1	0.776	1	1	1	1	0.367	1	0.511	1	0.95	1	0.477	0.0811	1	1	1	1	1	0.859	1	1
E066_Liver_Liver_erc2-chromatin15state-all-files/E066_14_ReprPCWk.bed	1	1	1	1	1	1	0.509	1	1	1	1	1	1	0.605	1	1	1	1	1	1	1	1	1	1	1	1	1	1	1	1	1	1	1	1	1	0.415	1	0.876	1	1	1	1	1	1	1	0.414	1	1	1
E066_Liver_Liver_erc2-chromatin15state-all-files/E066_15_Quies.bed	1	1	1	1	1	1	1	1	1	0.515	1	1	1	1	1	1	1	1	1	1	1	1	1	1	1	1	1	1	1	1	1	1	1	1	1	1	1	1	1	1	1	1	1	1	1	1	1	1	1
E118_HepG2_Hepatocellular_Carcinoma_Liver_erc2-chromatin15state-all-files/E118_1_TssA.bed	1	1	1	0.541	1	0.912	1	0.148	1	0.647	0.613	0.939	1	1	0.0934	1	0.51	1	1	0.25	0.000903	1	1	1	0.699	0.783	0.709	0.996	0.741	1	0.136	1	0.424	1	0.562	1	0.0039	0.187	0.473	1	0.169	1	1	1	0.743	0.929	1	1	0.654
E118_HepG2_Hepatocellular_Carcinoma_Liver_erc2-chromatin15state-all-files/E118_2_TssAFlnk.bed	1	1	0.313	0.781	0.302	1	1	0.0186	1	0.697	1	0.0202	1	1	0.054	0.0593	1	1	1	1	0.867	0.392	1	1	0.00799	1	1	0.0873	0.00109	1	0.922	1	0.00241	1	0.297	1	0.125	0.501	1	1	1	1	1	1	0.165	0.0251	1	1	0.344
E118_HepG2_Hepatocellular_Carcinoma_Liver_erc2-chromatin15state-all-files/E118_3_TxFlnk.bed	1	1	0.648	1	1	1	1	0.818	1	0.626	1	0.249	1	1	1	0.57	1	1	0.546	1	0.977	0.392	0.923	1	0.911	0.414	1	0.347	0.731	1	1	1	1	1	0.611	1	1	1	1	0.628	1	1	1	1	1	1	1	1	0.237
E118_HepG2_Hepatocellular_Carcinoma_Liver_erc2-chromatin15state-all-files/E118_4_Tx.bed	1	1	1	1	1	1	1	0.148	1	1	1	0.625	1	1	0.814	1	1	1	1	1	1	1	0.719	1	0.699	0.454	1	0.0721	0.587	1	1	1	0.538	1	0.322	1	0.162	0.778	1	1	1	1	1	1	0.429	1	1	1	0.854
E118_HepG2_Hepatocellular_Carcinoma_Liver_erc2-chromatin15state-all-files/E118_5_TxWk.bed	1	0.822	1	1	1	1	1	0.0336	1	0.066	0.408	0.0852	1	1	0.382	1	0.248	1	1	1	0.00252	1	0.186	1	0.755	0.443	0.549	0.495	0.469	1	0.0886	1	0.511	1	0.3	1	2.67e-06	1	1	1	1	1	1	1	0.289	0.724	1	1	1
E118_HepG2_Hepatocellular_Carcinoma_Liver_erc2-chromatin15state-all-files/E118_6_EnhG.bed	1	1	1	1	1	1	1	0.0022	1	1	1	0.814	1	1	1	1	0.239	1	1	1	0.185	1	1	1	1	1	1	0.902	0.502	1	0.957	1	0.186	1	0.284	1	0.802	1	1	1	1	1	1	1	0.00509	1	0.607	1	0.804
E118_HepG2_Hepatocellular_Carcinoma_Liver_erc2-chromatin15state-all-files/E118_7_Enh.bed	1	1	1	0.000435	1	1	1	0.0937	1	0.977	0.529	0.0459	1	1	1	1	0.061	1	1	1	0.0936	1	1	1	0.458	0.192	1	0.164	0.864	1	0.681	1	0.639	1	1	1	0.579	0.477	0.281	1	1	1	1	1	0.25	1	0.835	1	0.447
E118_HepG2_Hepatocellular_Carcinoma_Liver_erc2-chromatin15state-all-files/E118_8_ZNF-Rpts.bed	1	0.886	1	1	1	1	1	1	1	1	1	1	1	1	1	1	1	1	1	1	0.766	1	1	1	1	1	1	1	1	1	0.692	1	1	1	1	1	1	0.894	1	1	1	1	1	1	1	1	1	1	1
E118_HepG2_Hepatocellular_Carcinoma_Liver_erc2-chromatin15state-all-files/E118_9_Het.bed	1	1	1	1	1	1	1	1	1	0.226	1	1	1	0.896	1	1	1	1	1	1	1	1	1	1	1	1	1	1	1	1	1	1	1	1	1	1	1	0.958	1	1	1	1	1	1	1	1	1	1	1
E118_HepG2_Hepatocellular_Carcinoma_Liver_erc2-chromatin15state-all-files/E118_10_TssBiv.bed	1	0.769	0.942	0.208	1	1	1	0.143	1	0.212	1	0.0023	1	1	1	0.889	0.0426	1	1	1	0.0484	1	0.772	1	1	0.297	0.765	0.573	0.0829	1	0.121	1	0.987	1	0.194	1	0.32	0.137	0.638	1	1	0.0566	1	1	1	1	1	1	1
E118_HepG2_Hepatocellular_Carcinoma_Liver_erc2-chromatin15state-all-files/E118_11_BivFlnk.bed	1	1	1	1	1	1	0.458	0.363	1	0.982	1	0.105	1	1	1	1	0.749	1	1	1	0.382	1	0.601	1	1	0.938	1	1	1	1	0.2	1	1	1	0.374	0.382	0.323	0.801	1	1	0.456	1	1	1	0.606	0.161	1	1	0.535
E118_HepG2_Hepatocellular_Carcinoma_Liver_erc2-chromatin15state-all-files/E118_12_EnhBiv.bed	1	1	1	0.132	1	1	1	0.45	1	0.31	0.954	0.183	1	1	0.506	1	0.843	1	1	0.414	0.133	1	1	1	0.574	0.178	1	1	1	1	0.601	1	0.726	1	0.357	0.639	0.00908	1	0.925	1	1	1	1	0.155	0.541	0.329	1	1	0.0451
E118_HepG2_Hepatocellular_Carcinoma_Liver_erc2-chromatin15state-all-files/E118_13_ReprPC.bed	0.801	1	1	0.251	1	0.939	0.589	0.463	1	1	1	0.523	1	0.511	0.0532	1	0.631	1	1	1	1	1	1	1	0.682	0.634	1	1	1	0.949	0.64	1	1	1	1	0.54	1	0.06	0.517	1	0.216	1	1	1	1	0.835	1	1	0.126
E118_HepG2_Hepatocellular_Carcinoma_Liver_erc2-chromatin15state-all-files/E118_14_ReprPCWk.bed	0.00103	1	1	1	1	1	1	1	1	1	1	1	1	1	0.4	0.919	1	0.492	1	0.316	1	1	1	0.672	1	1	1	1	1	0.949	0.957	0.905	1	0.555	1	0.49	1	0.599	0.345	1	0.253	1	1	1	1	0.973	1	0.867	1
E118_HepG2_Hepatocellular_Carcinoma_Liver_erc2-chromatin15state-all-files/E118_15_Quies.bed	1	0.000933	1	1	1	1	1	1	1	0.764	1	1	0.00972	1	1	1	1	1	0.412	1	1	1	1	1	1	1	0.024	1	1	1	1	1	1	1	1	1	1	1	1	0.349	1	1	1	1	1	1	1	1	1
E017_IMR90_fetal_lung_fibroblasts_Lung_erc2-chromatin15state-all-files/E017_1_TssA.bed	1	0.219	1	0.0364	1	1	0.956	0.101	1	0.684	0.773	0.0223	1	1	0.148	1	0.248	1	1	0.137	0.00172	1	0.694	1	0.458	1	0.471	1	1	1	0.371	1	1	1	0.447	1	0.293	0.0046	0.667	1	0.246	1	1	1	1	0.69	0.917	1	0.658
E017_IMR90_fetal_lung_fibroblasts_Lung_erc2-chromatin15state-all-files/E017_2_TssAFlnk.bed	1	1	0.395	1	1	1	1	1	1	0.575	1	0.0917	1	1	1	0.289	0.911	1	1	1	0.13	0.824	0.812	1	0.338	1	1	0.925	0.0843	1	0.0907	1	0.987	1	0.267	1	0.0279	0.373	0.608	1	1	1	1	0.113	0.0232	0.587	0.77	1	1
E017_IMR90_fetal_lung_fibroblasts_Lung_erc2-chromatin15state-all-files/E017_3_TxFlnk.bed	1	1	1	1	1	1	1	0.0601	1	1	1	0.661	1	1	1	1	0.0767	1	0.546	1	0.52	1	1	1	0.907	1	1	0.9	1	1	0.847	1	1	1	1	1	2.86e-05	1	1	0.618	1	1	1	1	0.0736	1	0.78	1	0.203
E017_IMR90_fetal_lung_fibroblasts_Lung_erc2-chromatin15state-all-files/E017_4_Tx.bed	1	1	1	1	1	1	1	0.00937	1	0.626	1	0.055	1	1	0.0117	1	0.383	1	1	1	0.262	1	0.086	1	0.974	0.739	1	0.0881	0.0146	1	0.209	1	0.193	1	0.272	0.74	0.000633	0.887	0.552	1	1	1	1	1	0.138	1	0.78	1	1
E017_IMR90_fetal_lung_fibroblasts_Lung_erc2-chromatin15state-all-files/E017_5_TxWk.bed	0.589	0.9	1	0.145	1	1	1	0.0419	1	0.00141	1	0.221	1	1	1	1	0.0428	1	0.876	1	0.00629	1	0.986	1	0.981	0.267	1	0.677	0.53	1	0.863	1	0.0125	1	1	1	1.2e-06	0.961	1	1	1	1	1	1	0.212	1	1	1	0.582
E017_IMR90_fetal_lung_fibroblasts_Lung_erc2-chromatin15state-all-files/E017_6_EnhG.bed	1	1	1	0.887	1	1	1	0.281	0.857	0.735	1	0.052	1	1	1	1	0.297	1	1	1	0.0194	1	0.343	1	0.915	0.0142	1	1	1	1	0.066	1	1	1	1	1	0.0794	0.185	0.285	1	1	1	1	1	0.0219	0.908	1	1	0.587
E017_IMR90_fetal_lung_fibroblasts_Lung_erc2-chromatin15state-all-files/E017_7_Enh.bed	1	1	1	0.0587	1	1	1	0.00412	1	1	0.574	0.000785	1	1	0.329	1	0.485	1	0.871	1	0.0157	1	1	1	0.0651	0.909	1	0.803	0.905	1	0.495	1	0.545	1	0.316	1	0.000491	1	0.923	0.558	1	1	1	1	0.224	0.0243	0.607	1	0.117
E017_IMR90_fetal_lung_fibroblasts_Lung_erc2-chromatin15state-all-files/E017_8_ZNF-Rpts.bed	1	1	1	1	1	1	1	1	1	0.611	1	1	1	1	0.598	1	1	1	1	1	0.0849	1	1	1	1	1	0.567	1	1	1	0.506	1	1	1	1	1	1	1	1	1	1	1	1	1	1	1	1	1	1
E017_IMR90_fetal_lung_fibroblasts_Lung_erc2-chromatin15state-all-files/E017_9_Het.bed	1	1	1	1	1	1	1	1	1	1	1	1	1	0.328	1	1	1	1	1	1	1	1	0.993	1	1	1	1	1	1	9.65e-11	1	1	1	0.804	1	0.342	1	0.943	0.148	1	1	1	1	1	1	1	1	0.000121	1
E017_IMR90_fetal_lung_fibroblasts_Lung_erc2-chromatin15state-all-files/E017_10_TssBiv.bed	0.66	1	1	1	1	1	1	1	1	0.739	1	0.0122	1	1	1	1	1	1	1	1	1	1	0.205	1	1	1	0.289	1	0.449	1	0.134	1	1	1	0.374	1	0.0595	1	0.171	1	1	0.0442	1	1	1	1	1	1	0.452
E017_IMR90_fetal_lung_fibroblasts_Lung_erc2-chromatin15state-all-files/E017_11_BivFlnk.bed	0.8	0.769	1	1	1	1	1	1	1	0.892	1	1	1	1	1	1	0.134	1	1	1	0.00218	1	1	1	1	0.708	1	1	0.529	1	1	1	1	1	1	1	0.0975	0.719	1	1	1	1	1	1	0.475	1	1	1	1
E017_IMR90_fetal_lung_fibroblasts_Lung_erc2-chromatin15state-all-files/E017_12_EnhBiv.bed	1	0.718	1	1	1	1	0.466	1	1	1	1	0.45	1	1	1	1	1	0.112	1	1	0.0274	1	1	1	0.884	1	1	0.481	1	1	1	1	0.656	0.129	0.369	1	0.62	0.391	0.506	1	1	1	1	0.57	1	1	1	1	0.968
E017_IMR90_fetal_lung_fibroblasts_Lung_erc2-chromatin15state-all-files/E017_13_ReprPC.bed	0.4	1	1	0.0398	1	1	0.488	1	1	0.935	0.598	0.119	1	1	1	1	0.768	0.553	1	0.297	1	1	0.878	0.603	0.249	0.598	1	1	1	1	0.881	1	1	1	1	0.0224	1	0.161	0.295	1	0.187	1	0.275	1	1	0.277	1	1	0.0841
E017_IMR90_fetal_lung_fibroblasts_Lung_erc2-chromatin15state-all-files/E017_14_ReprPCWk.bed	0.706	1	1	1	1	0.912	0.882	1	1	1	1	1	1	0.851	0.00882	1	1	1	1	1	1	1	1	1	0.408	1	1	1	1	1	0.512	0.133	1	1	1	1	1	0.45	0.219	1	0.138	1	1	1	0.917	1	1	1	1
E017_IMR90_fetal_lung_fibroblasts_Lung_erc2-chromatin15state-all-files/E017_15_Quies.bed	1	1.02e-06	1	1	1	1	1	1	1	0.0564	1	1	0.012	1	1	1	1	1	1	1	1	1	1	1	1	1	0.00239	1	1	1	1	1	1	1	1	1	1	1	1	1	1	1	1	1	1	1	1	1	1
E088_Fetal_Lung_Lung_erc2-chromatin15state-all-files/E088_1_TssA.bed	1	0.462	1	0.167	1	1	1	0.0134	1	0.409	1	0.134	1	1	0.0743	1	0.157	1	1	0.936	0.00591	1	1	1	0.281	1	0.0601	1	1	1	0.545	1	1	1	0.357	1	0.00395	0.0565	0.135	1	0.724	0.987	1	1	0.685	1	0.857	1	0.899
E088_Fetal_Lung_Lung_erc2-chromatin15state-all-files/E088_2_TssAFlnk.bed	1	1	1	1	1	1	1	0.0705	1	0.89	1	0.0176	1	1	1	1	1	1	1	1	0.854	1	1	1	0.767	1	0.825	0.647	0.61	1	0.382	1	1	1	0.183	1	0.394	0.233	1	1	1	1	1	1	0.35	0.84	0.83	1	1
E088_Fetal_Lung_Lung_erc2-chromatin15state-all-files/E088_3_TxFlnk.bed	1	1	1	0.375	1	1	1	1	1	1	1	0.428	1	1	1	1	0.53	1	0.461	0.569	1	1	0.64	1	1	0.698	1	0.677	1	1	1	1	1	1	1	1	0.00423	1	1	0.41	1	1	1	1	1	1	1	1	0.486
E088_Fetal_Lung_Lung_erc2-chromatin15state-all-files/E088_4_Tx.bed	1	1	0.59	1	1	1	1	0.244	1	1	1	0.389	1	1	0.845	1	1	1	1	1	0.819	1	0.326	1	0.899	0.578	1	0.224	1	1	0.41	1	0.151	1	0.322	1	0.00351	0.691	1	1	1	1	1	1	0.564	1	0.94	1	0.9
E088_Fetal_Lung_Lung_erc2-chromatin15state-all-files/E088_5_TxWk.bed	1	0.913	1	0.126	0.494	1	1	0.000653	1	0.00309	0.118	0.00994	1	1	0.578	0.684	0.00543	1	1	1	0.000156	1	0.22	1	0.981	1	0.958	0.32	0.254	1	0.714	1	0.112	1	1	1	2.64e-08	0.977	1	1	1	1	1	1	0.00952	0.374	1	1	0.38
E088_Fetal_Lung_Lung_erc2-chromatin15state-all-files/E088_6_EnhG.bed	1	1	1	1	1	1	0.562	0.422	1	0.741	1	0.843	1	1	0.609	0.908	0.449	1	1	1	1	1	0.626	1	1	0.0564	1	0.744	0.612	1	1	1	0.344	1	0.936	1	0.547	1	0.956	1	0.722	1	1	1	0.286	0.845	1	1	0.255
E088_Fetal_Lung_Lung_erc2-chromatin15state-all-files/E088_7_Enh.bed	0.589	1	1	0.157	1	1	1	0.0992	1	1	1	0.00622	1	1	1	0.632	1	1	0.429	0.399	0.000242	1	0.527	1	0.576	0.708	1	0.564	0.325	1	1	1	0.906	1	1	1	0.0473	0.961	1	0.188	1	1	0.973	1	0.609	0.387	0.78	1	0.88
E088_Fetal_Lung_Lung_erc2-chromatin15state-all-files/E088_8_ZNF-Rpts.bed	1	1	1	1	1	1	1	1	1	1	1	1	1	1	1	1	1	1	0.747	1	0.368	1	1	1	0.832	0.734	1	1	0.917	1	0.82	1	1	1	0.879	1	1	0.848	1	1	1	1	1	1	1	1	1	1	1
E088_Fetal_Lung_Lung_erc2-chromatin15state-all-files/E088_9_Het.bed	1	1	1	1	1	1	1	1	1	1	1	1	1	1	1	1	1	1	1	1	0.934	1	1	1	1	1	1	1	1	0.106	1	1	1	1	1	1	1	1	0.0443	1	1	1	1	1	1	1	1	1	1
E088_Fetal_Lung_Lung_erc2-chromatin15state-all-files/E088_10_TssBiv.bed	1	1	1	1	1	1	0.603	1	1	1	1	0.00603	1	1	1	1	1	1	1	1	0.729	1	0.699	1	1	1	1	1	1	1	0.692	1	1	1	1	1	0.0877	0.742	1	1	0.18	1	1	0.229	1	1	1	1	1
E088_Fetal_Lung_Lung_erc2-chromatin15state-all-files/E088_11_BivFlnk.bed	1	1	1	1	1	1	1	1	1	0.395	1	0.497	1	1	1	1	0.145	1	1	1	0.293	1	0.261	1	1	0.72	1	1	1	1	0.239	1	1	1	1	1	0.362	0.752	1	1	1	1	1	0.212	1	1	1	1	1
E088_Fetal_Lung_Lung_erc2-chromatin15state-all-files/E088_12_EnhBiv.bed	1	0.943	1	0.00351	1	1	1	0.596	1	0.336	1	0.623	1	1	1	1	0.589	1	0.876	1	0.076	1	0.257	1	0.475	0.187	1	1	0.905	1	0.805	1	1	0.149	0.753	1	0.592	0.272	1	0.805	0.493	0.308	1	0.0428	0.181	0.67	1	1	0.454
E088_Fetal_Lung_Lung_erc2-chromatin15state-all-files/E088_13_ReprPC.bed	1	0.578	1	0.0935	1	1	0.304	0.984	1	0.0317	1	0.831	1	1	1	1	0.685	1	0.442	1	0.986	1	1	0.507	1	1	0.486	1	1	1	1	1	1	0.193	1	1	1	0.645	1	0.386	0.43	1	1	1	0.705	0.278	1	1	0.771
E088_Fetal_Lung_Lung_erc2-chromatin15state-all-files/E088_14_ReprPCWk.bed	0.557	1	1	1	1	1	1	1	1	1	0.992	0.674	1	0.652	0.00596	1	1	0.00475	1	0.887	1	1	1	1	1	1	1	1	1	1	1	1	1	1	1	1	1	0.572	0.0156	1	1	1	0.898	1	1	0.738	1	1	1
E088_Fetal_Lung_Lung_erc2-chromatin15state-all-files/E088_15_Quies.bed	1	0.886	1	1	1	1	0.912	1	1	1	1	1	0.566	1	1	1	1	1	1	1	1	1	1	1	1	1	0.978	1	1	0.499	1	1	1	1	1	0.483	1	1	1	1	1	1	1	1	1	1	1	0.423	1
E096_Lung_Lung_erc2-chromatin15state-all-files/E096_1_TssA.bed	1	0.803	1	0.198	1	0.939	1	0.000529	1	0.787	1	0.0389	1	1	0.116	1	0.016	1	1	1	0.0307	1	0.156	1	0.537	0.912	0.549	0.967	0.718	1	0.253	1	0.895	1	0.161	1	0.0271	0.0221	0.208	1	0.0938	0.987	1	1	0.0436	1	0.867	1	0.587
E096_Lung_Lung_erc2-chromatin15state-all-files/E096_2_TssAFlnk.bed	1	1	0.657	1	1	1	1	0.124	1	1	0.597	0.794	1	1	0.148	0.57	0.84	1	1	0.929	0.143	1	1	1	0.968	1	0.495	1	0.757	1	0.912	1	1	1	0.6	1	0.00395	0.0154	1	1	1	0.22	1	1	1	1	0.835	1	1
E096_Lung_Lung_erc2-chromatin15state-all-files/E096_3_TxFlnk.bed	1	1	1	1	0.136	1	1	0.0266	1	1	1	0.205	1	1	1	1	1	1	1	1	1	1	1	1	0.465	0.422	1	1	1	1	1	1	1	1	1	1	0.00204	1	1	1	1	1	1	1	0.359	1	1	1	0.287
E096_Lung_Lung_erc2-chromatin15state-all-files/E096_4_Tx.bed	1	1	1	1	1	1	1	0.256	1	0.804	1	0.0633	1	1	0.108	1	1	0.789	1	1	1	1	0.252	1	0.702	0.646	1	0.32	0.22	1	0.0984	1	0.156	1	0.109	0.333	0.324	0.369	0.282	1	1	1	1	1	0.48	0.958	0.867	1	0.787
E096_Lung_Lung_erc2-chromatin15state-all-files/E096_5_TxWk.bed	1	1	1	0.0393	1	1	1	2.77e-07	1	0.00459	0.0561	0.137	1	1	1	1	0.154	1	1	0.683	3.18e-05	1	1	1	0.0267	0.0567	1	0.0363	0.681	1	0.0907	1	0.112	1	0.384	1	2.53e-09	1	1	1	1	1	1	1	0.042	1	0.819	1	0.518
E096_Lung_Lung_erc2-chromatin15state-all-files/E096_6_EnhG.bed	1	1	1	1	0.0829	1	0.667	0.000102	1	0.764	1	0.892	1	1	0.408	0.849	0.552	0.373	1	0.976	0.246	0.788	1	1	0.337	0.044	1	0.984	0.268	1	0.0275	1	0.762	1	1	1	0.122	0.514	0.0459	1	0.575	1	1	1	0.0231	1	1	1	0.929
E096_Lung_Lung_erc2-chromatin15state-all-files/E096_7_Enh.bed	0.625	1	0.777	0.0661	1	1	1	3.87e-05	1	0.579	1	0.0216	1	1	0.163	0.202	0.0353	0.977	1	1	0.0779	1	0.539	1	0.237	0.134	1	1	0.306	1	0.489	1	0.116	1	1	0.234	0.174	0.717	0.664	1	1	1	1	0.229	2.85e-05	1	0.971	1	0.0755
E096_Lung_Lung_erc2-chromatin15state-all-files/E096_8_ZNF-Rpts.bed	0.664	1	1	1	1	1	1	1	1	1	1	0.964	1	1	1	1	0.909	1	1	1	0.178	1	1	1	0.981	1	1	1	1	1	0.74	1	1	1	0.952	1	1	0.797	1	1	1	1	1	1	1	1	1	1	0.333
E096_Lung_Lung_erc2-chromatin15state-all-files/E096_9_Het.bed	1	1	1	1	1	1	0.168	1	1	1	1	1	1	1	0.0841	1	1	1	1	1	1	1	1	1	1	1	1	1	1	0.0302	1	0.952	1	1	1	0.184	1	0.844	0.0202	1	1	1	1	1	1	0.403	1	0.303	1
E096_Lung_Lung_erc2-chromatin15state-all-files/E096_10_TssBiv.bed	1	1	1	1	1	1	1	1	1	1	1	0.145	1	1	1	1	1	1	1	1	1	1	1	1	1	1	1	1	1	1	0.216	1	1	1	1	1	0.244	1	1	1	1	1	1	1	1	1	1	1	1
E096_Lung_Lung_erc2-chromatin15state-all-files/E096_11_BivFlnk.bed	1	1	1	1	1	1	1	1	1	0.363	1	1	1	1	1	1	1	1	1	1	0.0145	1	1	1	1	1	0.5	0.312	1	1	1	1	1	1	0.124	1	1	1	1	1	1	1	1	1	1	1	1	1	1
E096_Lung_Lung_erc2-chromatin15state-all-files/E096_12_EnhBiv.bed	1	1	1	1	1	1	1	1	1	0.865	0.829	0.105	1	1	1	1	0.53	1	1	1	0.228	1	1	0.452	0.645	0.771	1	1	1	1	1	1	1	1	1	1	0.777	0.0643	1	1	0.105	1	1	1	0.429	1	1	1	0.113
E096_Lung_Lung_erc2-chromatin15state-all-files/E096_13_ReprPC.bed	1	0.811	1	0.291	1	1	0.29	1	1	0.444	1	0.0824	1	1	1	1	0.485	1	0.266	1	0.494	1	1	0.256	1	1	0.145	1	1	1	1	1	1	1	1	1	1	0.841	1	0.209	0.344	1	1	1	1	0.555	0.971	1	0.834
E096_Lung_Lung_erc2-chromatin15state-all-files/E096_14_ReprPCWk.bed	1	1	1	1	1	1	0.956	1	1	1	1	1	1	0.851	1	1	1	1	1	1	1	1	1	0.92	1	1	1	1	1	1	1	1	1	1	1	1	1	1	0.419	1	0.766	1	1	0.578	1	1	1	1	0.664
E096_Lung_Lung_erc2-chromatin15state-all-files/E096_15_Quies.bed	1	0.219	1	1	1	1	1	1	1	1	1	1	0.0333	1	1	1	1	1	1	1	1	1	1	1	1	1	0.471	1	1	1	1	1	1	1	1	1	1	1	1	1	1	1	1	1	1	1	1	1	1
E114_A549_EtOH_0.02pct_Lung_Carcinoma_Lung_erc2-chromatin15state-all-files/E114_1_TssA.bed	1	0.411	1	0.0834	1	1	0.672	0.0666	1	0.138	0.964	0.0379	1	1	0.192	1	0.157	1	1	0.446	0.0145	1	0.723	1	0.879	1	0.675	1	0.687	1	0.109	1	0.284	1	0.585	1	0.0117	0.0465	0.895	1	0.344	1	1	1	0.755	0.895	1	1	0.527
E114_A549_EtOH_0.02pct_Lung_Carcinoma_Lung_erc2-chromatin15state-all-files/E114_2_TssAFlnk.bed	1	1	1	0.00353	1	1	0.964	0.0704	1	1	1	0.0994	1	1	1	1	1	1	1	0.87	0.617	1	1	1	0.0115	0.803	1	1	0.269	1	0.495	1	0.286	1	0.423	1	0.125	0.235	0.143	1	1	1	1	1	1	0.177	1	1	1
E114_A549_EtOH_0.02pct_Lung_Carcinoma_Lung_erc2-chromatin15state-all-files/E114_3_TxFlnk.bed	1	1	0.0619	1	1	1	1	0.353	1	0.764	0.825	0.0727	1	1	1	0.0813	0.341	1	0.876	1	1	0.123	1	1	0.897	0.0189	1	0.634	1	1	1	1	0.623	1	0.859	1	0.403	0.614	0.957	0.954	1	1	1	1	0.242	1	1	1	0.0706
E114_A549_EtOH_0.02pct_Lung_Carcinoma_Lung_erc2-chromatin15state-all-files/E114_4_Tx.bed	1	1	0.75	1	1	1	1	0.133	1	1	1	1	1	1	0.584	1	1	1	1	0.985	0.766	1	0.145	1	1	0.97	1	0.37	0.779	1	0.833	1	0.545	1	0.201	1	0.31	0.586	1	1	1	1	1	1	0.399	1	0.904	1	1
E114_A549_EtOH_0.02pct_Lung_Carcinoma_Lung_erc2-chromatin15state-all-files/E114_5_TxWk.bed	1	1	1	0.331	0.377	1	1	0.00959	1	0.00591	0.968	0.0195	1	1	0.233	1	0.259	1	1	0.865	0.0034	1	0.257	1	0.794	0.9	0.454	0.274	0.15	1	0.156	1	0.17	1	1	1	5.44e-09	0.877	1	0.696	0.544	0.841	1	1	0.181	0.895	0.526	1	0.366
E114_A549_EtOH_0.02pct_Lung_Carcinoma_Lung_erc2-chromatin15state-all-files/E114_6_EnhG.bed	1	1	1	1	1	1	1	0.169	1	1	1	0.732	1	1	1	1	1	1	1	1	1	1	1	1	0.267	0.93	1	1	1	1	0.425	1	1	1	1	1	0.254	0.908	1	1	1	1	1	1	0.077	1	1	1	0.472
E114_A549_EtOH_0.02pct_Lung_Carcinoma_Lung_erc2-chromatin15state-all-files/E114_7_Enh.bed	1	1	1	0.00353	1	1	1	0.0192	1	1	0.939	0.0087	1	1	1	1	0.3	1	0.937	1	0.000702	1	1	1	0.458	0.447	1	1	0.598	1	0.311	1	1	1	0.947	1	0.0196	0.0971	1	0.868	1	1	1	1	0.154	0.13	1	1	0.0665
E114_A549_EtOH_0.02pct_Lung_Carcinoma_Lung_erc2-chromatin15state-all-files/E114_8_ZNF-Rpts.bed	1	1	1	1	1	1	1	1	1	1	1	0.663	1	1	1	1	1	1	1	1	0.0291	1	1	1	0.249	0.787	1	1	1	1	0.834	1	1	0.96	1	1	1	1	1	1	1	1	1	1	1	1	1	1	1
E114_A549_EtOH_0.02pct_Lung_Carcinoma_Lung_erc2-chromatin15state-all-files/E114_9_Het.bed	1	1	1	1	1	1	1	1	1	1	1	0.928	1	1	1	1	1	1	1	1	0.32	1	1	1	1	1	1	1	1	1	0.823	1	1	1	1	1	1	0.951	1	1	1	1	1	1	1	1	1	1	1
E114_A549_EtOH_0.02pct_Lung_Carcinoma_Lung_erc2-chromatin15state-all-files/E114_10_TssBiv.bed	1	1	1	1	1	1	1	0.503	1	1	1	0.0202	1	1	1	1	0.124	1	1	0.0744	0.0562	1	0.716	1	1	0.735	0.126	0.677	1	1	1	1	1	1	0.423	1	1	1	1	1	1	0.113	1	1	0.476	1	1	1	1
E114_A549_EtOH_0.02pct_Lung_Carcinoma_Lung_erc2-chromatin15state-all-files/E114_11_BivFlnk.bed	1	1	1	1	1	1	1	1	1	0.149	1	1	1	1	1	1	0.366	1	1	1	1	1	0.45	0.368	1	1	1	1	1	1	1	1	1	1	1	1	1	1	1	1	1	1	1	1	1	1	1	1	1
E114_A549_EtOH_0.02pct_Lung_Carcinoma_Lung_erc2-chromatin15state-all-files/E114_12_EnhBiv.bed	1	1	1	1	1	1	1	1	1	1	1	0.274	1	1	1	1	1	1	1	1	0.506	1	1	1	1	1	1	1	1	1	1	0.391	1	1	0.331	1	0.528	1	1	1	0.165	1	0.476	1	0.352	1	1	1	1
E114_A549_EtOH_0.02pct_Lung_Carcinoma_Lung_erc2-chromatin15state-all-files/E114_13_ReprPC.bed	1	0.513	1	1	1	1	0.719	1	1	1	1	1	1	1	0.324	1	1	1	1	1	1	1	1	1	1	1	1	1	1	1	1	1	1	1	1	1	1	0.446	1	1	0.769	1	1	1	1	1	1	1	1
E114_A549_EtOH_0.02pct_Lung_Carcinoma_Lung_erc2-chromatin15state-all-files/E114_14_ReprPCWk.bed	1	1	1	1	1	0.592	1	1	1	1	1	1	1	0.463	0.467	1	1	1	1	1	1	1	1	1	1	1	1	1	1	0.0495	1	0.48	1	0.15	1	0.587	1	1	1	1	0.191	1	1	1	1	0.683	1	0.942	1
E114_A549_EtOH_0.02pct_Lung_Carcinoma_Lung_erc2-chromatin15state-all-files/E114_15_Quies.bed	1	0.0664	1	1	1	1	1	1	1	0.518	1	1	0.571	1	1	1	1	1	0.87	1	1	1	1	1	1	1	0.464	1	1	1	1	1	1	1	1	1	1	1	0.763	0.765	1	1	1	1	1	1	1	1	1
E128_NHLF_Lung_Fibroblast_Primary_Cells_Lung_erc2-chromatin15state-all-files/E128_1_TssA.bed	1	0.33	1	0.335	1	1	1	0.0244	1	0.805	1	0.0384	1	1	0.22	1	0.259	1	1	0.432	0.00619	1	1	1	0.462	1	0.165	1	0.689	1	0.16	1	1	1	0.564	1	0.0521	0.00218	0.449	1	0.111	1	1	1	0.48	0.907	0.756	1	0.83
E128_NHLF_Lung_Fibroblast_Primary_Cells_Lung_erc2-chromatin15state-all-files/E128_2_TssAFlnk.bed	1	1	0.535	1	1	1	1	1	1	1	1	0.179	1	1	1	0.465	1	1	1	0.88	0.133	0.951	0.937	1	0.467	0.912	1	1	0.14	1	0.533	1	1	1	0.637	1	0.0589	0.945	1	1	0.73	1	1	0.163	0.521	0.411	0.83	1	1
E128_NHLF_Lung_Fibroblast_Primary_Cells_Lung_erc2-chromatin15state-all-files/E128_3_TxFlnk.bed	1	1	1	1	1	1	1	0.333	1	0.37	1	0.0258	1	1	1	1	0.787	1	0.582	0.847	0.257	1	0.936	1	0.957	0.447	1	0.988	1	1	0.912	1	1	1	0.622	1	0.000298	1	0.487	0.612	1	1	1	1	0.285	1	1	1	0.0676
E128_NHLF_Lung_Fibroblast_Primary_Cells_Lung_erc2-chromatin15state-all-files/E128_4_Tx.bed	1	1	1	1	1	1	1	0.0255	1	1	0.968	0.238	1	1	0.809	1	1	0.819	1	1	0.923	1	0.154	1	1	0.661	1	0.0373	0.776	1	0.144	1	0.32	1	0.369	0.354	0.0171	0.2	1	1	1	1	1	1	0.062	1	0.756	1	0.351
E128_NHLF_Lung_Fibroblast_Primary_Cells_Lung_erc2-chromatin15state-all-files/E128_5_TxWk.bed	0.68	1	1	0.174	0.417	1	1	0.00131	1	0.0118	1	0.0626	1	1	0.295	0.666	0.00035	1	1	1	0.000185	1	0.728	1	1	0.211	0.38	0.32	0.14	1	0.895	1	0.0113	1	1	1	4.83e-11	1	1	1	1	1	1	1	0.469	0.731	1	1	1
E128_NHLF_Lung_Fibroblast_Primary_Cells_Lung_erc2-chromatin15state-all-files/E128_6_EnhG.bed	1	1	1	0.92	1	1	0.806	0.594	1	1	1	0.0783	1	1	1	1	0.315	1	1	1	0.574	0.885	0.742	1	0.0894	0.0325	1	1	0.584	1	0.406	1	0.713	1	1	1	0.121	0.452	0.45	1	0.839	1	1	1	0.167	0.111	1	1	1
E128_NHLF_Lung_Fibroblast_Primary_Cells_Lung_erc2-chromatin15state-all-files/E128_7_Enh.bed	1	1	1	0.568	1	1	1	0.0122	1	1	0.913	0.00232	1	1	1	1	0.801	1	0.368	1	0.000188	1	1	1	0.486	0.73	1	1	0.644	1	0.0558	1	0.738	1	0.998	1	0.00909	1	0.781	0.346	1	1	1	1	0.185	1	1	1	0.203
E128_NHLF_Lung_Fibroblast_Primary_Cells_Lung_erc2-chromatin15state-all-files/E128_8_ZNF-Rpts.bed	1	1	1	1	1	1	1	1	1	0.932	1	1	1	1	1	1	0.655	1	1	1	0.819	1	1	1	0.81	0.762	1	1	1	1	0.746	1	1	1	1	1	1	1	1	1	1	1	1	1	1	1	1	1	1
E128_NHLF_Lung_Fibroblast_Primary_Cells_Lung_erc2-chromatin15state-all-files/E128_9_Het.bed	1	1	1	1	1	1	1	1	1	1	1	1	1	1	1	1	1	1	1	1	1	1	1	1	1	1	1	1	1	0.599	1	1	1	1	1	1	1	0.798	1	1	1	1	1	1	1	1	1	0.983	1
E128_NHLF_Lung_Fibroblast_Primary_Cells_Lung_erc2-chromatin15state-all-files/E128_10_TssBiv.bed	1	1	1	0.317	1	1	1	1	1	0.775	1	0.0843	1	1	1	1	0.463	1	1	1	0.00553	1	0.239	1	1	1	0.99	0.641	1	1	0.533	1	1	1	0.371	1	0.247	1	1	1	1	0.0905	1	1	1	1	1	1	1
E128_NHLF_Lung_Fibroblast_Primary_Cells_Lung_erc2-chromatin15state-all-files/E128_11_BivFlnk.bed	1	1	1	1	1	1	1	1	1	0.505	1	1	1	1	1	1	0.248	1	1	1	0.32	1	0.343	1	1	0.362	1	1	1	1	1	1	1	1	1	1	0.345	0.438	1	1	1	1	1	1	0.218	1	1	1	1
E128_NHLF_Lung_Fibroblast_Primary_Cells_Lung_erc2-chromatin15state-all-files/E128_12_EnhBiv.bed	1	1	1	0.452	1	1	0.488	1	1	1	1	1	1	1	1	1	0.502	1	1	1	1	1	1	1	1	1	1	1	0.429	1	1	1	1	0.0383	1	1	1	0.301	1	1	1	1	1	1	1	1	1	1	1
E128_NHLF_Lung_Fibroblast_Primary_Cells_Lung_erc2-chromatin15state-all-files/E128_13_ReprPC.bed	0.425	0.77	1	0.0264	1	1	0.303	1	1	0.682	0.0931	0.045	1	0.132	1	1	0.77	1	0.674	0.117	0.46	1	0.725	0.468	0.292	0.303	1	1	1	1	0.476	1	1	1	1	0.252	0.577	0.628	1	0.676	0.111	1	0.685	1	0.943	0.477	0.912	1	0.454
E128_NHLF_Lung_Fibroblast_Primary_Cells_Lung_erc2-chromatin15state-all-files/E128_14_ReprPCWk.bed	0.123	1	1	0.94	1	0.912	1	0.747	1	1	0.672	0.803	1	1	0.00217	0.156	0.414	0.0677	1	1	1	0.719	1	0.716	0.0461	0.935	1	1	0.113	1	0.316	1	1	0.462	0.374	0.115	1	0.263	0.304	1	0.149	1	1	0.854	1	0.424	1	1	0.149
E128_NHLF_Lung_Fibroblast_Primary_Cells_Lung_erc2-chromatin15state-all-files/E128_15_Quies.bed	1	0.0127	1	1	1	1	1	1	1	1	1	1	0.192	1	1	1	1	1	1	1	1	1	1	1	1	1	0.656	1	1	0.164	1	1	1	1	1	1	1	1	1	1	1	1	1	1	1	1	1	0.423	1
E023_Mesenchymal_Stem_Cell_Derived_Adipocyte_Cultured_Mesenchymal_erc2-chromatin15state-all-files/E023_1_TssA.bed	1	0.629	0.657	0.032	1	1	0.656	0.212	1	0.296	1	0.00131	1	1	0.187	0.649	0.000422	1	0.658	0.226	6.5e-08	0.38	0.259	1	0.851	1	0.0439	0.91	0.921	1	0.253	1	1	1	0.0453	1	0.000154	0.0054	0.428	0.565	0.346	0.139	1	1	0.159	0.614	0.765	1	1
E023_Mesenchymal_Stem_Cell_Derived_Adipocyte_Cultured_Mesenchymal_erc2-chromatin15state-all-files/E023_2_TssAFlnk.bed	1	1	1	1	1	1	1	0.165	1	1	0.973	0.195	1	1	1	0.939	1	1	0.824	0.369	0.00381	1	1	1	0.398	1	1	0.9	0.424	1	0.547	1	0.424	1	1	1	0.0122	0.595	1	0.862	1	1	1	1	0.685	1	0.912	1	0.351
E023_Mesenchymal_Stem_Cell_Derived_Adipocyte_Cultured_Mesenchymal_erc2-chromatin15state-all-files/E023_3_TxFlnk.bed	1	1	0.648	0.54	1	1	0.902	1	1	0.59	1	0.269	1	1	1	0.632	1	1	1	1	1	0.607	1	1	0.466	0.893	1	0.906	1	1	1	1	0.315	1	1	1	0.0385	0.954	0.664	1	1	1	1	1	1	1	1	1	1
E023_Mesenchymal_Stem_Cell_Derived_Adipocyte_Cultured_Mesenchymal_erc2-chromatin15state-all-files/E023_4_Tx.bed	1	1	1	1	1	1	1	0.827	1	1	1	0.814	1	1	0.369	1	1	1	1	1	0.977	1	0.258	1	0.774	0.93	1	0.116	1	1	1	1	0.352	1	0.189	1	0.00415	1	1	1	1	1	1	1	0.687	1	1	1	1
E023_Mesenchymal_Stem_Cell_Derived_Adipocyte_Cultured_Mesenchymal_erc2-chromatin15state-all-files/E023_5_TxWk.bed	1	1	1	0.229	0.953	1	1	1.85e-05	1	0.0372	1	0.00664	1	1	1	1	0.00105	1	0.281	1	0.0003	1	0.597	1	1	0.508	0.848	0.594	0.164	1	0.284	1	0.193	1	0.882	1	2.41e-06	0.989	1	0.349	1	1	1	1	0.29	0.611	0.411	1	0.728
E023_Mesenchymal_Stem_Cell_Derived_Adipocyte_Cultured_Mesenchymal_erc2-chromatin15state-all-files/E023_6_EnhG.bed	1	1	1	1	1	1	1	0.329	1	0.977	1	1	1	1	1	1	0.295	1	1	1	0.199	1	1	1	1	0.0173	1	1	0.0672	1	0.871	1	0.334	1	0.693	1	0.175	0.961	1	1	1	1	1	1	0.187	1	1	1	1
E023_Mesenchymal_Stem_Cell_Derived_Adipocyte_Cultured_Mesenchymal_erc2-chromatin15state-all-files/E023_7_Enh.bed	1	1	1	0.475	1	1	1	0.0622	1	1	0.763	0.0101	1	1	1	1	1	1	1	1	4.76e-05	1	1	1	0.552	0.357	1	0.809	1	1	0.195	1	0.15	1	0.75	1	0.00979	0.696	1	0.836	0.807	1	1	1	0.0895	0.0243	1	1	0.621
E023_Mesenchymal_Stem_Cell_Derived_Adipocyte_Cultured_Mesenchymal_erc2-chromatin15state-all-files/E023_8_ZNF-Rpts.bed	1	1	1	1	1	1	1	1	1	0.518	1	1	1	1	0.845	1	1	1	1	1	0.359	1	1	1	1	1	1	1	0.931	1	0.829	1	1	1	0.919	1	1	0.894	1	1	1	1	1	1	1	1	1	1	1
E023_Mesenchymal_Stem_Cell_Derived_Adipocyte_Cultured_Mesenchymal_erc2-chromatin15state-all-files/E023_9_Het.bed	1	1	1	1	1	1	0.214	1	1	1	1	1	1	1	1	1	1	1	1	0.995	1	1	1	1	0.767	1	1	1	1	0.986	0.978	1	1	1	0.936	1	1	0.877	0.293	1	1	1	1	1	1	1	1	1	1
E023_Mesenchymal_Stem_Cell_Derived_Adipocyte_Cultured_Mesenchymal_erc2-chromatin15state-all-files/E023_10_TssBiv.bed	1	1	1	1	1	1	1	1	1	1	1	0.376	1	1	1	1	1	1	1	1	0.152	1	1	1	1	0.59	0.992	1	0.453	1	1	1	1	1	1	1	1	1	1	1	1	1	1	1	1	1	0.68	1	0.444
E023_Mesenchymal_Stem_Cell_Derived_Adipocyte_Cultured_Mesenchymal_erc2-chromatin15state-all-files/E023_11_BivFlnk.bed	1	1	1	1	1	1	1	0.315	1	0.622	1	1	1	1	1	1	0.293	1	1	1	0.46	1	1	1	1	0.491	1	1	1	1	1	1	1	1	1	1	0.482	1	1	1	1	1	0.438	1	1	1	1	1	1
E023_Mesenchymal_Stem_Cell_Derived_Adipocyte_Cultured_Mesenchymal_erc2-chromatin15state-all-files/E023_12_EnhBiv.bed	0.767	0.43	1	0.531	1	1	1	1	1	0.627	0.968	0.249	1	1	1	1	1	1	1	1	1	1	1	1	0.838	0.8	1	1	1	1	1	1	1	0.405	1	1	1	0.925	1	1	1	1	1	1	1	1	1	1	1
E023_Mesenchymal_Stem_Cell_Derived_Adipocyte_Cultured_Mesenchymal_erc2-chromatin15state-all-files/E023_13_ReprPC.bed	0.401	1	1	0.0431	1	1	0.214	1	1	1	1	0.483	1	1	1	1	0.415	1	1	0.904	1	1	0.473	0.61	1	1	1	1	1	1	1	1	1	0.0383	1	0.791	1	0.0609	1	1	0.616	1	0.783	1	1	1	1	1	0.423
E023_Mesenchymal_Stem_Cell_Derived_Adipocyte_Cultured_Mesenchymal_erc2-chromatin15state-all-files/E023_14_ReprPCWk.bed	0.589	1	1	1	1	0.626	1	1	1	1	0.885	1	1	0.0371	0.108	1	1	0.288	1	1	1	1	1	1	1	1	1	1	1	1	1	1	1	1	1	0.684	1	0.799	0.0156	1	0.461	1	1	1	1	0.943	1	1	0.505
E023_Mesenchymal_Stem_Cell_Derived_Adipocyte_Cultured_Mesenchymal_erc2-chromatin15state-all-files/E023_15_Quies.bed	1	0.00323	1	1	1	1	1	1	1	0.641	1	1	0.0261	1	1	1	1	1	1	1	1	1	1	1	1	1	0.188	1	1	0.898	1	1	1	1	1	1	1	1	1	1	1	1	1	1	1	1	1	1	1
E025_Adipose_Derived_Mesenchymal_Stem_Cell_Cultured_Mesenchymal_erc2-chromatin15state-all-files/E025_1_TssA.bed	1	0.729	0.657	0.0402	1	1	0.749	0.0174	1	0.674	0.507	0.00144	1	1	0.228	0.689	0.0126	1	0.7	0.256	3.33e-05	1	0.601	1	0.388	1	0.113	0.638	1	1	0.0453	1	1	1	0.0571	1	2.75e-05	0.0132	0.486	0.611	0.38	0.149	1	0.28	0.582	1	0.604	1	0.403
E025_Adipose_Derived_Mesenchymal_Stem_Cell_Cultured_Mesenchymal_erc2-chromatin15state-all-files/E025_2_TssAFlnk.bed	1	1	1	1	1	1	1	0.201	1	1	1	0.602	1	1	1	0.163	1	1	0.795	0.3	0.0244	1	0.947	1	1	1	1	0.82	0.0198	1	1	1	0.579	1	1	1	0.0316	0.614	1	0.821	1	1	1	1	0.187	0.419	1	1	0.462
E025_Adipose_Derived_Mesenchymal_Stem_Cell_Cultured_Mesenchymal_erc2-chromatin15state-all-files/E025_3_TxFlnk.bed	1	1	1	1	1	1	1	1	1	0.357	1	0.0466	1	1	1	1	0.351	1	0.528	1	1	1	1	1	0.267	0.172	1	1	1	1	1	1	0.396	1	1	1	0.176	1	0.776	0.628	1	1	1	1	1	1	1	1	0.734
E025_Adipose_Derived_Mesenchymal_Stem_Cell_Cultured_Mesenchymal_erc2-chromatin15state-all-files/E025_4_Tx.bed	1	1	1	1	1	1	1	0.463	1	0.881	1	0.419	1	1	1	1	0.776	1	1	1	0.488	1	0.145	1	0.729	1	1	0.422	1	1	1	1	0.1	1	0.509	1	0.000193	0.958	1	1	1	1	1	1	0.476	1	1	1	0.723
E025_Adipose_Derived_Mesenchymal_Stem_Cell_Cultured_Mesenchymal_erc2-chromatin15state-all-files/E025_5_TxWk.bed	1	1	1	0.466	1	1	1	2.81e-05	1	0.313	0.797	0.0213	1	1	0.325	1	0.00728	1	1	0.769	0.00447	1	1	1	1	0.475	0.254	0.0721	0.318	1	0.669	1	0.608	1	1	1	2.25e-05	1	1	1	1	1	1	1	0.181	0.929	0.83	1	1
E025_Adipose_Derived_Mesenchymal_Stem_Cell_Cultured_Mesenchymal_erc2-chromatin15state-all-files/E025_6_EnhG.bed	1	1	1	0.721	1	1	1	0.701	1	1	1	0.432	1	1	1	1	0.593	1	1	1	0.458	1	1	1	1	0.356	1	1	0.318	1	0.25	1	1	1	0.929	1	0.326	0.517	1	1	1	1	1	1	0.343	1	1	1	1
E025_Adipose_Derived_Mesenchymal_Stem_Cell_Cultured_Mesenchymal_erc2-chromatin15state-all-files/E025_7_Enh.bed	0.683	1	1	0.404	1	1	1	0.007	1	1	0.968	0.0564	1	1	1	1	1	1	0.5	1	2.95e-05	1	1	1	0.0322	0.385	1	1	1	1	0.099	1	0.0759	1	0.745	1	0.00144	0.961	1	0.178	1	1	1	1	0.0307	0.0242	1	1	0.242
E025_Adipose_Derived_Mesenchymal_Stem_Cell_Cultured_Mesenchymal_erc2-chromatin15state-all-files/E025_8_ZNF-Rpts.bed	1	1	1	1	1	1	1	1	1	0.54	1	1	1	1	0.845	1	1	1	1	1	0.687	1	1	1	1	1	1	1	1	1	0.269	1	1	1	0.913	1	1	0.888	1	1	1	1	1	1	1	1	1	1	1
E025_Adipose_Derived_Mesenchymal_Stem_Cell_Cultured_Mesenchymal_erc2-chromatin15state-all-files/E025_9_Het.bed	1	1	1	1	1	1	1	1	1	1	1	1	1	1	1	1	1	1	1	1	1	1	1	1	1	1	0.997	1	1	0.304	1	1	1	1	1	0.834	1	0.414	0.334	1	1	1	1	1	1	1	1	1	1
E025_Adipose_Derived_Mesenchymal_Stem_Cell_Cultured_Mesenchymal_erc2-chromatin15state-all-files/E025_10_TssBiv.bed	0.943	1	1	1	1	1	1	1	1	0.296	1	0.0585	1	1	1	1	0.661	1	1	1	0.0483	1	0.833	0.555	1	0.389	0.708	0.869	1	1	1	1	1	1	0.47	1	1	0.86	1	1	1	1	1	1	1	1	1	1	0.167
E025_Adipose_Derived_Mesenchymal_Stem_Cell_Cultured_Mesenchymal_erc2-chromatin15state-all-files/E025_11_BivFlnk.bed	1	1	1	1	1	1	1	1	1	0.801	1	1	1	1	1	1	1	1	1	1	1	1	0.216	1	1	0.151	0.996	1	1	1	1	1	1	1	1	1	0.677	0.236	1	1	1	1	0.72	1	1	1	1	1	1
E025_Adipose_Derived_Mesenchymal_Stem_Cell_Cultured_Mesenchymal_erc2-chromatin15state-all-files/E025_12_EnhBiv.bed	1	0.406	1	0.92	1	1	0.948	1	1	0.471	1	0.547	1	1	0.0376	1	1	1	1	1	0.822	1	0.71	1	1	1	1	1	1	1	1	1	1	1	0.693	1	0.6	1	1	1	0.456	1	1	1	1	1	1	1	0.845
E025_Adipose_Derived_Mesenchymal_Stem_Cell_Cultured_Mesenchymal_erc2-chromatin15state-all-files/E025_13_ReprPC.bed	0.458	1	1	0.399	1	0.912	0.546	1	1	1	1	0.568	1	1	0.428	1	0.805	1	1	0.315	1	1	1	1	0.706	1	1	1	1	1	1	1	1	0.187	1	0.587	1	0.3	0.664	1	0.566	1	1	1	1	0.909	1	1	0.33
E025_Adipose_Derived_Mesenchymal_Stem_Cell_Cultured_Mesenchymal_erc2-chromatin15state-all-files/E025_14_ReprPCWk.bed	0.32	1	1	0.702	1	0.939	1	1	1	1	1	0.692	1	0.0371	0.0791	1	1	1	1	1	1	1	1	0.672	1	0.742	1	1	0.686	1	0.596	1	1	1	1	0.152	1	0.373	0.00209	1	0.352	1	1	1	1	0.746	1	1	0.484
E025_Adipose_Derived_Mesenchymal_Stem_Cell_Cultured_Mesenchymal_erc2-chromatin15state-all-files/E025_15_Quies.bed	1	0.045	1	1	1	1	0.509	1	1	0.721	1	1	0.0241	1	1	1	1	1	1	1	1	1	1	1	1	1	0.244	1	1	0.00346	1	1	1	1	1	1	1	1	1	1	1	1	1	1	1	1	1	0.936	1
E026_Bone_Marrow_Derived_Cultured_Mesenchymal_Stem_Cells_Mesenchymal_erc2-chromatin15state-all-files/E026_1_TssA.bed	1	0.739	1	0.0536	1	1	1	0.001	1	0.19	1	0.0607	1	1	0.112	1	0.00808	1	1	0.175	4.41e-05	1	0.601	1	0.918	1	0.0356	1	1	1	0.168	1	0.713	1	0.483	1	0.0226	0.0221	0.293	1	0.848	0.139	1	1	0.368	1	0.989	1	0.457
E026_Bone_Marrow_Derived_Cultured_Mesenchymal_Stem_Cells_Mesenchymal_erc2-chromatin15state-all-files/E026_2_TssAFlnk.bed	1	0.819	0.711	1	1	1	1	0.465	1	1	1	0.151	1	1	1	0.889	0.795	1	1	0.905	0.0259	1	1	1	0.55	0.964	1	0.267	0.168	1	0.471	1	1	1	0.425	1	0.0473	0.0668	0.778	1	1	1	1	0.365	0.00684	1	0.479	1	0.643
E026_Bone_Marrow_Derived_Cultured_Mesenchymal_Stem_Cells_Mesenchymal_erc2-chromatin15state-all-files/E026_3_TxFlnk.bed	1	1	1	1	1	1	1	0.919	1	0.317	1	0.121	1	1	1	1	0.366	1	0.507	0.899	0.612	1	0.961	1	0.537	0.443	1	1	1	1	0.935	1	1	1	1	1	0.00621	1	0.777	0.558	1	1	1	1	0.797	1	1	1	0.231
E026_Bone_Marrow_Derived_Cultured_Mesenchymal_Stem_Cells_Mesenchymal_erc2-chromatin15state-all-files/E026_4_Tx.bed	1	1	1	1	1	1	1	0.228	1	0.977	1	1	1	1	0.315	1	1	1	1	1	0.258	1	0.22	1	0.722	0.288	1	0.52	0.973	1	0.382	1	0.637	1	0.468	1	0.000106	0.818	1	1	1	1	1	1	0.222	1	1	1	1
E026_Bone_Marrow_Derived_Cultured_Mesenchymal_Stem_Cells_Mesenchymal_erc2-chromatin15state-all-files/E026_5_TxWk.bed	0.568	1	1	0.331	0.34	1	1	0.00323	1	0.0811	1	0.11	1	1	1	0.735	0.0027	1	1	1	0.0226	1	0.912	1	1	0.895	1	0.354	0.0739	1	0.25	1	0.182	1	0.75	1	8.82e-08	1	1	1	1	1	1	1	0.0796	0.621	0.78	1	0.723
E026_Bone_Marrow_Derived_Cultured_Mesenchymal_Stem_Cells_Mesenchymal_erc2-chromatin15state-all-files/E026_6_EnhG.bed	1	1	1	1	1	1	1	0.462	1	1	1	0.582	1	1	1	1	0.73	1	1	1	0.119	0.824	0.92	1	1	0.169	1	1	0.818	1	1	1	1	1	1	1	0.163	1	1	1	1	1	1	1	1	1	1	1	1
E026_Bone_Marrow_Derived_Cultured_Mesenchymal_Stem_Cells_Mesenchymal_erc2-chromatin15state-all-files/E026_7_Enh.bed	1	1	1	0.102	1	1	1	0.00093	1	1	0.0657	0.0132	1	1	1	1	0.803	1	0.656	1	0.00356	1	1	1	0.000657	0.375	1	0.672	1	1	1	1	0.547	1	1	1	2.75e-05	0.955	1	0.628	1	1	1	1	0.247	0.075	1	1	0.242
E026_Bone_Marrow_Derived_Cultured_Mesenchymal_Stem_Cells_Mesenchymal_erc2-chromatin15state-all-files/E026_8_ZNF-Rpts.bed	1	1	1	1	1	1	1	1	1	0.385	1	1	1	1	1	1	1	1	1	1	0.559	1	1	1	0.957	1	1	1	1	1	0.943	1	1	1	1	1	1	1	1	1	1	1	1	1	1	1	1	1	1
E026_Bone_Marrow_Derived_Cultured_Mesenchymal_Stem_Cells_Mesenchymal_erc2-chromatin15state-all-files/E026_9_Het.bed	1	1	1	1	1	1	1	1	1	1	1	1	1	1	0.489	1	1	1	1	1	1	1	0.594	1	1	1	1	1	1	0.354	1	1	1	1	1	0.115	1	0.586	0.664	1	1	1	1	1	1	1	1	0.385	1
E026_Bone_Marrow_Derived_Cultured_Mesenchymal_Stem_Cells_Mesenchymal_erc2-chromatin15state-all-files/E026_10_TssBiv.bed	1	1	1	1	1	1	0.471	1	1	0.299	1	0.00382	1	1	1	1	1	1	1	1	0.0422	1	0.667	1	1	1	1	0.677	1	1	0.187	1	1	1	0.107	1	0.736	0.249	1	1	0.165	1	1	1	1	1	1	1	1
E026_Bone_Marrow_Derived_Cultured_Mesenchymal_Stem_Cells_Mesenchymal_erc2-chromatin15state-all-files/E026_11_BivFlnk.bed	1	1	1	1	1	1	1	1	1	0.612	1	1	1	1	1	1	1	1	1	1	0.412	1	0.467	1	1	0.462	1	1	1	1	1	1	1	1	1	1	1	1	1	1	1	1	1	1	1	1	1	1	1
E026_Bone_Marrow_Derived_Cultured_Mesenchymal_Stem_Cells_Mesenchymal_erc2-chromatin15state-all-files/E026_12_EnhBiv.bed	1	1	1	0.331	1	1	1	1	1	0.798	1	1	1	1	1	1	1	1	1	1	0.584	1	1	1	1	1	1	1	1	1	0.585	1	1	1	1	1	0.67	1	1	1	1	1	1	1	1	1	1	1	1
E026_Bone_Marrow_Derived_Cultured_Mesenchymal_Stem_Cells_Mesenchymal_erc2-chromatin15state-all-files/E026_13_ReprPC.bed	0.337	0.971	1	0.346	1	1	0.464	1	1	1	0.87	0.19	1	1	0.561	1	0.376	1	1	0.222	1	1	1	1	0.722	0.783	1	1	1	1	0.772	1	1	0.0428	1	0.227	1	0.668	1	1	0.165	1	1	1	1	0.738	1	1	0.129
E026_Bone_Marrow_Derived_Cultured_Mesenchymal_Stem_Cells_Mesenchymal_erc2-chromatin15state-all-files/E026_14_ReprPCWk.bed	0.453	1	1	1	1	0.856	1	1	1	1	1	1	1	0.463	0.0591	1	1	1	1	0.494	1	0.401	1	1	1	1	1	1	1	1	1	0.575	1	1	1	1	1	0.126	0.125	1	0.493	1	1	0.941	1	0.508	1	1	0.936
E026_Bone_Marrow_Derived_Cultured_Mesenchymal_Stem_Cells_Mesenchymal_erc2-chromatin15state-all-files/E026_15_Quies.bed	1	0.00268	1	1	1	1	1	1	1	1	1	1	0.793	1	1	1	1	1	1	1	1	1	1	1	1	1	0.243	1	1	0.0688	1	1	1	1	1	1	1	1	1	1	1	1	1	1	1	1	1	1	1
E049_Mesenchymal_Stem_Cell_Derived_Chondrocyte_Cultured_Mesenchymal_erc2-chromatin15state-all-files/E049_1_TssA.bed	1	1	1	0.00342	1	1	0.235	0.00749	1	0.0648	1	0.00474	1	1	0.0425	1	0.0179	1	0.461	1	0.000182	1	0.737	1	0.58	1	0.226	1	0.903	1	0.141	1	1	1	0.292	1	0.0607	0.032	0.0915	0.405	0.126	1	1	1	0.575	0.719	1	1	1
E049_Mesenchymal_Stem_Cell_Derived_Chondrocyte_Cultured_Mesenchymal_erc2-chromatin15state-all-files/E049_2_TssAFlnk.bed	1	1	0.832	1	1	1	1	0.396	1	1	1	0.0427	1	1	1	0.52	0.824	1	1	0.131	0.0046	1	0.728	1	0.82	1	1	1	0.0588	1	0.936	1	0.329	1	0.588	1	0.0427	0.0163	1	1	1	1	1	0.133	0.149	0.00937	0.589	1	0.444
E049_Mesenchymal_Stem_Cell_Derived_Chondrocyte_Cultured_Mesenchymal_erc2-chromatin15state-all-files/E049_3_TxFlnk.bed	1	1	1	1	1	1	0.874	0.833	1	0.241	1	0.09	1	1	1	1	0.744	1	0.507	1	0.189	1	1	1	1	0.893	1	0.904	1	1	1	1	0.274	1	1	1	0.00885	0.956	0.649	0.558	1	1	1	1	1	1	1	1	0.203
E049_Mesenchymal_Stem_Cell_Derived_Chondrocyte_Cultured_Mesenchymal_erc2-chromatin15state-all-files/E049_4_Tx.bed	1	1	1	1	1	1	1	0.277	1	0.687	1	0.376	1	1	0.148	1	0.694	1	1	1	0.32	1	0.209	1	1	0.588	1	0.162	0.458	1	0.521	1	0.976	1	0.673	1	0.000105	0.815	1	1	1	1	1	1	0.222	1	1	1	1
E049_Mesenchymal_Stem_Cell_Derived_Chondrocyte_Cultured_Mesenchymal_erc2-chromatin15state-all-files/E049_5_TxWk.bed	1	1	1	0.0997	0.0608	1	1	0.00231	1	0.0294	1	0.0182	1	1	1	1	0.239	1	1	1	0.00246	1	1	1	0.897	1	1	0.244	1	1	0.0785	1	0.475	1	0.628	1	0.000234	1	1	1	0.563	1	1	1	0.137	0.162	1	1	0.925
E049_Mesenchymal_Stem_Cell_Derived_Chondrocyte_Cultured_Mesenchymal_erc2-chromatin15state-all-files/E049_6_EnhG.bed	1	1	1	1	1	1	1	0.423	1	1	1	0.83	1	1	1	1	0.928	1	1	1	0.663	0.878	1	1	1	0.0318	1	1	0.961	1	0.957	1	0.232	1	1	1	0.064	1	1	1	1	1	1	1	0.419	1	0.955	1	1
E049_Mesenchymal_Stem_Cell_Derived_Chondrocyte_Cultured_Mesenchymal_erc2-chromatin15state-all-files/E049_7_Enh.bed	1	1	1	1	1	1	1	2.87e-05	1	1	0.0332	0.0228	1	1	1	1	0.46	1	0.876	1	0.0104	1	0.993	1	0.00217	0.0169	1	1	1	1	0.235	1	0.352	1	0.952	1	3.96e-05	1	1	0.501	1	1	1	1	0.0447	0.209	1	1	0.236
E049_Mesenchymal_Stem_Cell_Derived_Chondrocyte_Cultured_Mesenchymal_erc2-chromatin15state-all-files/E049_8_ZNF-Rpts.bed	1	1	1	1	1	1	1	1	1	0.81	1	1	1	1	1	1	1	1	1	1	0.353	1	1	1	1	1	1	1	1	1	1	1	1	1	0.739	1	1	0.877	1	1	1	1	1	1	1	1	1	1	1
E049_Mesenchymal_Stem_Cell_Derived_Chondrocyte_Cultured_Mesenchymal_erc2-chromatin15state-all-files/E049_9_Het.bed	1	1	1	1	1	1	1	1	1	1	1	1	1	1	0.928	1	1	1	1	1	1	1	0.971	1	1	1	1	1	1	0.0219	1	1	1	1	1	0.529	1	0.713	0.144	1	1	1	1	1	1	1	1	0.279	1
E049_Mesenchymal_Stem_Cell_Derived_Chondrocyte_Cultured_Mesenchymal_erc2-chromatin15state-all-files/E049_10_TssBiv.bed	1	1	1	1	1	1	1	1	1	0.717	1	0.325	1	1	1	1	1	1	1	1	0.131	1	1	0.452	1	1	0.902	1	1	1	1	1	1	1	0.326	1	0.649	0.609	1	1	1	1	1	1	1	1	1	1	0.403
E049_Mesenchymal_Stem_Cell_Derived_Chondrocyte_Cultured_Mesenchymal_erc2-chromatin15state-all-files/E049_11_BivFlnk.bed	0.822	1	1	1	1	1	1	1	1	0.49	1	1	1	1	1	1	1	1	1	1	0.303	1	0.27	1	1	0.787	1	0.795	1	1	0.226	1	1	1	0.475	1	1	0.798	1	1	1	0.128	1	1	0.54	1	1	1	1
E049_Mesenchymal_Stem_Cell_Derived_Chondrocyte_Cultured_Mesenchymal_erc2-chromatin15state-all-files/E049_12_EnhBiv.bed	0.943	0.602	1	0.646	1	1	1	1	1	0.185	1	1	1	1	0.221	1	0.734	1	1	1	0.951	1	0.444	1	0.916	0.901	1	1	1	1	1	1	1	1	1	1	1	1	1	1	1	1	0.843	1	1	0.888	1	1	0.707
E049_Mesenchymal_Stem_Cell_Derived_Chondrocyte_Cultured_Mesenchymal_erc2-chromatin15state-all-files/E049_13_ReprPC.bed	1	1	1	0.206	1	1	0.788	1	1	1	0.968	0.322	1	1	1	0.547	0.785	1	1	0.162	1	0.968	1	1	1	0.613	1	1	1	1	1	1	1	0.247	1	0.218	1	0.268	1	1	0.106	1	1	1	1	0.614	1	1	0.296
E049_Mesenchymal_Stem_Cell_Derived_Chondrocyte_Cultured_Mesenchymal_erc2-chromatin15state-all-files/E049_14_ReprPCWk.bed	0.407	1	1	1	1	1	0.999	1	1	1	1	0.79	1	1	0.0891	1	1	1	1	1	1	1	1	1	1	1	1	1	1	1	1	0.947	1	1	1	0.966	1	0.291	0.111	1	1	1	1	0.983	1	1	1	1	0.943
E049_Mesenchymal_Stem_Cell_Derived_Chondrocyte_Cultured_Mesenchymal_erc2-chromatin15state-all-files/E049_15_Quies.bed	1	0.0027	1	1	1	1	0.937	1	1	0.936	1	1	0.132	1	1	1	1	1	0.924	1	1	1	1	1	1	1	0.384	1	1	0.162	1	1	1	1	1	1	1	1	1	0.902	1	1	1	1	1	1	1	1	1
E052_Muscle_Satellite_Cultured_Muscle_erc2-chromatin15state-all-files/E052_1_TssA.bed	1	0.48	1	0.0587	1	1	0.788	0.11	1	0.401	0.954	0.0796	1	1	0.0855	1	0.158	1	1	0.492	0.000999	1	0.823	1	0.957	1	0.181	1	1	1	0.376	1	1	1	0.356	1	0.0977	0.00818	0.464	1	0.191	1	1	1	0.415	0.822	0.865	1	0.905
E052_Muscle_Satellite_Cultured_Muscle_erc2-chromatin15state-all-files/E052_2_TssAFlnk.bed	1	1	0.711	1	1	1	1	0.508	1	1	1	0.0617	1	1	1	0.804	0.439	1	1	0.522	0.0129	1	0.363	1	0.156	0.901	1	0.495	0.0866	1	0.0326	1	1	1	0.708	1	0.00506	0.141	0.615	1	1	1	1	1	0.557	0.827	0.859	1	0.711
E052_Muscle_Satellite_Cultured_Muscle_erc2-chromatin15state-all-files/E052_3_TxFlnk.bed	1	1	1	1	1	1	1	0.349	1	0.701	1	0.0114	1	1	1	1	0.362	1	0.578	1	0.305	1	0.951	1	0.981	0.172	1	1	1	1	0.963	1	0.987	1	1	1	0.0716	0.998	0.668	0.628	1	1	1	1	0.797	1	1	1	0.75
E052_Muscle_Satellite_Cultured_Muscle_erc2-chromatin15state-all-files/E052_4_Tx.bed	1	1	1	1	1	1	1	0.101	1	1	1	0.84	1	1	0.424	1	1	1	1	1	1	1	0.22	1	1	0.797	1	0.238	1	1	0.863	1	0.503	1	0.347	1	7.43e-05	0.994	1	1	1	1	1	1	0.0895	1	1	1	1
E052_Muscle_Satellite_Cultured_Muscle_erc2-chromatin15state-all-files/E052_5_TxWk.bed	1	1	1	0.124	1	1	1	0.0138	1	0.0375	1	0.0796	1	1	0.781	0.488	6.37e-05	1	1	1	0.000285	1	0.689	1	1	0.111	0.363	0.588	0.0739	1	0.156	1	0.107	1	1	1	9.74e-06	1	1	1	1	1	1	1	0.704	1	0.425	1	0.572
E052_Muscle_Satellite_Cultured_Muscle_erc2-chromatin15state-all-files/E052_6_EnhG.bed	1	1	1	1	1	1	1	0.165	1	1	1	0.0456	1	1	1	1	0.846	1	1	1	0.212	1	1	0.526	1	0.141	1	1	0.164	1	0.255	1	1	1	1	1	0.064	0.961	1	1	1	1	1	1	0.0716	0.838	1	1	0.332
E052_Muscle_Satellite_Cultured_Muscle_erc2-chromatin15state-all-files/E052_7_Enh.bed	0.841	1	1	0.781	1	1	1	0.0548	1	1	0.303	0.000962	1	1	1	1	0.463	1	0.288	1	0.00135	1	1	1	0.0157	0.385	1	1	1	1	0.825	1	0.468	1	0.802	1	0.000213	0.846	1	0.0645	1	1	1	1	0.338	0.00399	0.975	1	0.149
E052_Muscle_Satellite_Cultured_Muscle_erc2-chromatin15state-all-files/E052_8_ZNF-Rpts.bed	1	1	1	1	1	1	1	1	1	0.938	1	1	1	1	1	1	0.745	1	1	1	0.836	1	1	1	0.831	1	1	1	1	1	0.817	1	1	1	1	1	1	0.932	1	1	1	1	1	1	1	1	1	1	1
E052_Muscle_Satellite_Cultured_Muscle_erc2-chromatin15state-all-files/E052_9_Het.bed	1	1	1	1	1	1	1	1	1	1	1	1	1	1	1	1	1	1	1	1	1	1	1	1	1	1	1	1	1	1	1	1	1	1	1	1	1	0.876	1	1	1	1	1	1	1	0.918	1	1	1
E052_Muscle_Satellite_Cultured_Muscle_erc2-chromatin15state-all-files/E052_10_TssBiv.bed	0.687	1	1	0.32	1	1	1	1	1	0.752	1	0.342	1	1	1	1	1	1	0.446	1	0.139	1	0.587	1	1	1	0.96	1	1	1	1	1	1	1	0.349	1	0.0404	0.634	1	0.41	1	0.0905	1	1	1	1	1	1	1
E052_Muscle_Satellite_Cultured_Muscle_erc2-chromatin15state-all-files/E052_11_BivFlnk.bed	1	0.826	1	1	1	1	1	1	1	0.817	1	0.115	1	1	1	1	1	1	1	1	0.617	1	1	1	1	0.693	1	0.597	1	1	1	1	1	1	0.375	1	0.746	0.718	1	1	1	0.0704	1	1	0.445	1	1	1	1
[truncated: 319 more rows]
[truncated: 205 more columns]
