# Supplementary material for: Integrative analysis of 3604 GWAS reveals multiple novel cell type-specific regulatory associations
Source: Genome Biol. 2022 Jan 7;23:13. doi: 10.1186/s13059-021-02560-3 (PMC8742386; doi:10.1186/s13059-021-02560-3)
Supplement: Supplementary file 12 — Additional file 12: Table S11. FORGE2 histone mark broadPeak analysis results (q-values, combined H3K4me1, H3K4me3, H3K9me3, H3K36me3, and H3K27me3) for a set of 25 variants from a GWAS on myeloproliferative neoplasms. [file 13059_2021_2560_MOESM12_ESM.xlsx]

## Sheet: Table S11. MPNs_example.analysi
Table S11: FORGE2 histone mark broadPeak analysis results (q-values, combined H3K4me1, H3K4me3, H3K9me3, H3K36me3, and H3K27me3) for a set of 25 variants from a GWAS on myeloproliferative neoplasms:
FORGE2 enrichment Zscore	FORGE2 enrichment Pvalue	Cell	Tissue	Datatype	File	Probe	Accession	FORGE2 enrichment Qvalue
5.312	0.000121	E029 Primary monocytes from peripheral blood	Blood	H3K4me1	E029-H3K4me1.broadPeak.gz	rs12616536,rs1633768,rs17099613,rs250763,rs7310615,rs74676712,rs7713981,rs9864772,rs9946154	E029	0.0114
2.352	0.0321	E029 Primary monocytes from peripheral blood	Blood	H3K4me3	E029-H3K4me3.broadPeak.gz	rs74676712,rs7713981	E029	0.232
1.57	0.112	E029 Primary monocytes from peripheral blood	Blood	H3K9me3	E029-H3K9me3.broadPeak.gz	rs12616536,rs1327494,rs1633768,rs2853677,rs7705526,rs7713981	E029	0.369
-1.547	0.977	E029 Primary monocytes from peripheral blood	Blood	H3K27me3	E029-H3K27me3.broadPeak.gz	rs1633768	E029	1
1.753	0.0829	E029 Primary monocytes from peripheral blood	Blood	H3K36me3	E029-H3K36me3.broadPeak.gz	rs1327494,rs17879961,rs1800057,rs60833263,rs62471615,rs7310615,rs8002412	E029	0.332
3.384	0.00602	E032 Primary B cells from peripheral blood	Blood	H3K4me1	E032-H3K4me1.broadPeak.gz	rs12616536,rs1633768,rs1860826,rs250763,rs55857134,rs62471615,rs7310615,rs74676712	E032	0.0838
0.868	0.227	E032 Primary B cells from peripheral blood	Blood	H3K4me3	E032-H3K4me3.broadPeak.gz	rs12616536,rs2853677,rs74676712	E032	0.553
-2.082	1	E032 Primary B cells from peripheral blood	Blood	H3K9me3	E032-H3K9me3.broadPeak.gz		E032	1
-2.057	0.991	E032 Primary B cells from peripheral blood	Blood	H3K27me3	E032-H3K27me3.broadPeak.gz	rs1633768,rs17099613,rs7713981,rs9946154	E032	1
0.548	0.372	E032 Primary B cells from peripheral blood	Blood	H3K36me3	E032-H3K36me3.broadPeak.gz	rs1327494,rs17879961,rs1800057,rs62471615,rs7310615,rs8002412	E032	0.706
3.394	0.00828	E033 Primary T cells from cord blood	Blood	H3K4me1	E033-H3K4me1.broadPeak.gz	rs1860826,rs250763,rs55857134,rs60833263,rs7310615,rs74676712	E033	0.085
1.767	0.0884	E033 Primary T cells from cord blood	Blood	H3K4me3	E033-H3K4me3.broadPeak.gz	rs55857134,rs60833263,rs74676712	E033	0.332
-1.947	1	E033 Primary T cells from cord blood	Blood	H3K9me3	E033-H3K9me3.broadPeak.gz		E033	1
-1.38	0.958	E033 Primary T cells from cord blood	Blood	H3K27me3	E033-H3K27me3.broadPeak.gz	rs1633768	E033	1
0.857	0.263	E033 Primary T cells from cord blood	Blood	H3K36me3	E033-H3K36me3.broadPeak.gz	rs1327494,rs17879961,rs1800057,rs60833263,rs7705526,rs8002412	E033	0.587
2.687	0.0192	E034 Primary T cells from peripheral blood	Blood	H3K4me1	E034-H3K4me1.broadPeak.gz	rs1327494,rs1633768,rs1860826,rs250763,rs55857134,rs60833263,rs62471615,rs7310615	E034	0.162
-0.803	0.741	E034 Primary T cells from peripheral blood	Blood	H3K4me3	E034-H3K4me3.broadPeak.gz	rs7713981	E034	1
-1.543	0.971	E034 Primary T cells from peripheral blood	Blood	H3K9me3	E034-H3K9me3.broadPeak.gz	rs144202762,rs7713981,rs9847631	E034	1
0.013	0.572	E034 Primary T cells from peripheral blood	Blood	H3K27me3	E034-H3K27me3.broadPeak.gz	rs116466979,rs12616536,rs1633768,rs17099613,rs7705526,rs7713981,rs77249081	E034	0.892
0.617	0.345	E034 Primary T cells from peripheral blood	Blood	H3K36me3	E034-H3K36me3.broadPeak.gz	rs17879961,rs1800057,rs55857134,rs62471615,rs7310615,rs8002412	E034	0.694
3.853	0.00302	E046 Primary Natural Killer cells from peripheral	Blood	H3K4me1	E046-H3K4me1.broadPeak.gz	rs12616536,rs1633768,rs1860826,rs250763,rs55857134,rs62471615,rs7310615,rs7713981	E046	0.0491
0.257	0.456	E046 Primary Natural Killer cells from peripheral	Blood	H3K4me3	E046-H3K4me3.broadPeak.gz	rs1800057,rs55857134,rs74676712	E046	0.808
-0.746	0.83	E046 Primary Natural Killer cells from peripheral	Blood	H3K9me3	E046-H3K9me3.broadPeak.gz	rs75405916,rs7705526,rs7713981,rs77249081	E046	1
-0.665	0.811	E046 Primary Natural Killer cells from peripheral	Blood	H3K27me3	E046-H3K27me3.broadPeak.gz	rs1633768,rs17099613,rs62329718,rs77249081	E046	1
2.197	0.0346	E046 Primary Natural Killer cells from peripheral	Blood	H3K36me3	E046-H3K36me3.broadPeak.gz	rs1327494,rs17879961,rs1800057,rs1860826,rs55857134,rs62471615,rs7310615,rs8002412	E046	0.241
4.58	0.000256	E050 Primary hematopoietic stem cells G-CSF-mobili	Blood	H3K4me1	E050-H3K4me1.broadPeak.gz	rs12616536,rs1633768,rs17099613,rs1860826,rs55857134,rs60833263,rs62471615,rs7310615,rs74676712,rs7713981,rs9946154	E050	0.0125
1.918	0.069	E050 Primary hematopoietic stem cells G-CSF-mobili	Blood	H3K4me3	E050-H3K4me3.broadPeak.gz	rs1633768,rs250763,rs7310615,rs74676712,rs9946154	E050	0.321
-1.326	0.946	E050 Primary hematopoietic stem cells G-CSF-mobili	Blood	H3K9me3	E050-H3K9me3.broadPeak.gz	rs1327494,rs2853677,rs7705526	E050	1
-1.81	0.984	E050 Primary hematopoietic stem cells G-CSF-mobili	Blood	H3K27me3	E050-H3K27me3.broadPeak.gz	rs144202762,rs7713981,rs77249081	E050	1
2.867	0.00958	E050 Primary hematopoietic stem cells G-CSF-mobili	Blood	H3K36me3	E050-H3K36me3.broadPeak.gz	rs12616536,rs1327494,rs17879961,rs1800057,rs2853677,rs55857134,rs60833263,rs7705526,rs8002412,rs9847631	E050	0.091
5.621	2.64e-05	E051 Primary hematopoietic stem cells G-CSF-mobili	Blood	H3K4me1	E051-H3K4me1.broadPeak.gz	rs12616536,rs1633768,rs17099613,rs1860826,rs55857134,rs60833263,rs62471615,rs7310615,rs74676712,rs7713981,rs9946154	E051	0.00514
4.715	0.00106	E051 Primary hematopoietic stem cells G-CSF-mobili	Blood	H3K4me3	E051-H3K4me3.broadPeak.gz	rs12616536,rs1633768,rs7310615,rs74676712,rs7713981,rs9946154	E051	0.0294
-1.473	0.966	E051 Primary hematopoietic stem cells G-CSF-mobili	Blood	H3K9me3	E051-H3K9me3.broadPeak.gz	rs1327494,rs2853677	E051	1
-2.255	1	E051 Primary hematopoietic stem cells G-CSF-mobili	Blood	H3K27me3	E051-H3K27me3.broadPeak.gz		E051	1
2.935	0.00759	E051 Primary hematopoietic stem cells G-CSF-mobili	Blood	H3K36me3	E051-H3K36me3.broadPeak.gz	rs1327494,rs17879961,rs1800057,rs2853677,rs55857134,rs60833263,rs62471615,rs7705526,rs8002412,rs9847631	E051	0.0838
0.107	0.535	E028 Breast variant Human Mammary Epithelial Cells	Breast	H3K4me1	E028-H3K4me1.broadPeak.gz	rs17879961,rs250763,rs74676712,rs9847631,rs9864772,rs9946154	E028	0.872
0.002	0.577	E028 Breast variant Human Mammary Epithelial Cells	Breast	H3K4me3	E028-H3K4me3.broadPeak.gz	rs1327494,rs1800057,rs2853677,rs74676712,rs9847631	E028	0.892
-2.199	0.997	E028 Breast variant Human Mammary Epithelial Cells	Breast	H3K9me3	E028-H3K9me3.broadPeak.gz	rs144202762	E028	1
0.903	0.253	E028 Breast variant Human Mammary Epithelial Cells	Breast	H3K27me3	E028-H3K27me3.broadPeak.gz	rs1633768,rs17099613,rs1860826,rs2853677,rs60833263,rs62329718,rs7705526,rs7713981,rs9864772	E028	0.573
0.62	0.338	E028 Breast variant Human Mammary Epithelial Cells	Breast	H3K36me3	E028-H3K36me3.broadPeak.gz	rs1327494,rs17879961,rs1800057,rs55857134,rs62471615,rs8002412,rs9847631	E028	0.694
0.084	0.544	E003 H1 Cells	ES Cell	H3K4me1	E003-H3K4me1.broadPeak.gz	rs1633768,rs60833263,rs7713981,rs9946154	E003	0.872
0.53	0.265	E003 H1 Cells	ES Cell	H3K4me3	E003-H3K4me3.broadPeak.gz	rs1633768,rs74676712	E003	0.587
0.593	0.345	E003 H1 Cells	ES Cell	H3K9me3	E003-H3K9me3.broadPeak.gz	rs1327494,rs1633768,rs1800057,rs2853677,rs62471615,rs74676712,rs77249081	E003	0.694
0.34	0.447	E003 H1 Cells	ES Cell	H3K27me3	E003-H3K27me3.broadPeak.gz	rs1633768,rs2853677,rs7713981,rs9864772,rs9946154	E003	0.799
1.057	0.206	E003 H1 Cells	ES Cell	H3K36me3	E003-H3K36me3.broadPeak.gz	rs1327494,rs17879961,rs1800057,rs2853677,rs62471615,rs7310615,rs7705526,rs8002412	E003	0.521
0.844	0.281	E004 H1 BMP4 Derived Mesendoderm Cultured Cells	ES Cell	H3K4me1	E004-H3K4me1.broadPeak.gz	rs1633768,rs250763,rs60833263,rs74676712,rs9946154	E004	0.61
-0.977	0.799	E004 H1 BMP4 Derived Mesendoderm Cultured Cells	ES Cell	H3K4me3	E004-H3K4me3.broadPeak.gz	rs74676712	E004	1
-1.231	0.925	E004 H1 BMP4 Derived Mesendoderm Cultured Cells	ES Cell	H3K9me3	E004-H3K9me3.broadPeak.gz	rs250763	E004	1
-0.676	0.806	E004 H1 BMP4 Derived Mesendoderm Cultured Cells	ES Cell	H3K27me3	E004-H3K27me3.broadPeak.gz	rs116466979,rs1633768,rs2853677,rs74676712,rs9946154	E004	1
-0.588	0.765	E004 H1 BMP4 Derived Mesendoderm Cultured Cells	ES Cell	H3K36me3	E004-H3K36me3.broadPeak.gz	rs17879961,rs9946154	E004	1
1.604	0.109	E005 H1 BMP4 Derived Trophoblast Cultured Cells	ES Cell	H3K4me1	E005-H3K4me1.broadPeak.gz	rs1633768,rs1860826,rs250763,rs60833263,rs7310615,rs74676712,rs7713981,rs77249081,rs9864772	E005	0.369
1.515	0.143	E005 H1 BMP4 Derived Trophoblast Cultured Cells	ES Cell	H3K4me3	E005-H3K4me3.broadPeak.gz	rs1633768,rs1860826,rs60833263,rs7310615,rs7705526,rs7713981,rs9864772	E005	0.428
2.146	0.056	E005 H1 BMP4 Derived Trophoblast Cultured Cells	ES Cell	H3K9me3	E005-H3K9me3.broadPeak.gz	rs116466979,rs1860826,rs2853677,rs60833263,rs7310615,rs7705526,rs7713981,rs77249081,rs9864772	E005	0.285
-0.671	0.804	E005 H1 BMP4 Derived Trophoblast Cultured Cells	ES Cell	H3K27me3	E005-H3K27me3.broadPeak.gz	rs144202762,rs1633768,rs2853677,rs7713981,rs9864772	E005	1
1.258	0.169	E005 H1 BMP4 Derived Trophoblast Cultured Cells	ES Cell	H3K36me3	E005-H3K36me3.broadPeak.gz	rs1633768,rs17879961,rs1860826,rs7705526,rs77249081,rs9864772,rs9946154	E005	0.457
2.19	0.0502	E006 H1 Derived Mesenchymal Stem Cells	ES Cell	H3K4me1	E006-H3K4me1.broadPeak.gz	rs1633768,rs17099613,rs1860826,rs60833263,rs7310615,rs7713981,rs77249081,rs9864772,rs9946154	E006	0.278
2.215	0.0484	E006 H1 Derived Mesenchymal Stem Cells	ES Cell	H3K4me3	E006-H3K4me3.broadPeak.gz	rs116466979,rs1633768,rs17099613,rs1860826,rs60833263,rs74676712,rs7713981,rs9864772	E006	0.278
-2.456	0.999	E006 H1 Derived Mesenchymal Stem Cells	ES Cell	H3K9me3	E006-H3K9me3.broadPeak.gz	rs7705526	E006	1
0.142	0.523	E006 H1 Derived Mesenchymal Stem Cells	ES Cell	H3K27me3	E006-H3K27me3.broadPeak.gz	rs116466979,rs12616536,rs60833263,rs7713981	E006	0.872
1.708	0.1	E006 H1 Derived Mesenchymal Stem Cells	ES Cell	H3K36me3	E006-H3K36me3.broadPeak.gz	rs1633768,rs17099613,rs1860826,rs60833263,rs7310615,rs7713981,rs8002412,rs9864772	E006	0.359
-0.252	0.662	E007 H1 Derived Neuronal Progenitor Cultured Cells	ES Cell	H3K4me1	E007-H3K4me1.broadPeak.gz	rs1633768,rs17099613,rs250763,rs60833263,rs7713981,rs9946154	E007	0.971
-0.215	0.653	E007 H1 Derived Neuronal Progenitor Cultured Cells	ES Cell	H3K4me3	E007-H3K4me3.broadPeak.gz	rs12616536,rs1860826,rs2853677,rs7713981,rs9946154	E007	0.965
-1.713	0.974	E007 H1 Derived Neuronal Progenitor Cultured Cells	ES Cell	H3K9me3	E007-H3K9me3.broadPeak.gz	rs12616536,rs250763,rs7713981	E007	1
-0.145	0.631	E007 H1 Derived Neuronal Progenitor Cultured Cells	ES Cell	H3K27me3	E007-H3K27me3.broadPeak.gz	rs116466979,rs12616536,rs1860826,rs2853677,rs55857134,rs74676712,rs7705526	E007	0.947
-1.732	0.977	E007 H1 Derived Neuronal Progenitor Cultured Cells	ES Cell	H3K36me3	E007-H3K36me3.broadPeak.gz	rs17879961,rs9864772,rs9946154	E007	1
0.526	0.385	E008 H9 Cells	ES Cell	H3K4me1	E008-H3K4me1.broadPeak.gz	rs1633768,rs60833263,rs74676712,rs9864772,rs9946154	E008	0.722
2.162	0.0549	E008 H9 Cells	ES Cell	H3K4me3	E008-H3K4me3.broadPeak.gz	rs2853677,rs60833263,rs74676712,rs7705526,rs7713981,rs9946154	E008	0.285
1.406	0.15	E008 H9 Cells	ES Cell	H3K9me3	E008-H3K9me3.broadPeak.gz	rs1860826,rs2853677,rs60833263,rs7310615,rs7705526,rs7713981,rs77249081,rs9864772,rs9946154	E008	0.431
0.586	0.353	E008 H9 Cells	ES Cell	H3K27me3	E008-H3K27me3.broadPeak.gz	rs144202762,rs1633768,rs7713981,rs9946154	E008	0.694
1.222	0.176	E008 H9 Cells	ES Cell	H3K36me3	E008-H3K36me3.broadPeak.gz	rs17099613,rs17879961,rs1800057,rs1860826,rs2853677,rs7310615,rs7705526,rs7713981,rs77249081,rs9946154	E008	0.471
2.954	0.00774	E085 Fetal Intestine Small	Feta Intestine Small	H3K4me1	E085-H3K4me1.broadPeak.gz	rs12616536,rs1327494,rs1633768,rs17099613,rs250763,rs2853677,rs60833263,rs7310615,rs74676712,rs7713981,rs9946154	E085	0.0838
1.159	0.189	E085 Fetal Intestine Small	Feta Intestine Small	H3K4me3	E085-H3K4me3.broadPeak.gz	rs12616536,rs1800057,rs74676712	E085	0.491
-0.518	0.762	E085 Fetal Intestine Small	Feta Intestine Small	H3K9me3	E085-H3K9me3.broadPeak.gz	rs1327494,rs2853677,rs62471615,rs7713981,rs77249081	E085	1
-0.464	0.749	E085 Fetal Intestine Small	Feta Intestine Small	H3K27me3	E085-H3K27me3.broadPeak.gz	rs12616536,rs1633768,rs17099613,rs77249081,rs9864772,rs9946154	E085	1
2.463	0.0239	E085 Fetal Intestine Small	Feta Intestine Small	H3K36me3	E085-H3K36me3.broadPeak.gz	rs12616536,rs1327494,rs17879961,rs1860826,rs60833263,rs7310615,rs7705526,rs77249081,rs8002412,rs9864772	E085	0.187
1.595	0.105	E080 Fetal Adrenal Gland	Fetal Adrenal Gland	H3K4me1	E080-H3K4me1.broadPeak.gz	rs1633768,rs17099613,rs250763,rs60833263,rs7310615,rs74676712,rs9946154	E080	0.365
-0.676	0.598	E080 Fetal Adrenal Gland	Fetal Adrenal Gland	H3K4me3	E080-H3K4me3.broadPeak.gz	rs74676712	E080	0.903
-0.686	0.822	E080 Fetal Adrenal Gland	Fetal Adrenal Gland	H3K9me3	E080-H3K9me3.broadPeak.gz	rs1327494,rs144202762,rs60833263	E080	1
1.826	0.101	E080 Fetal Adrenal Gland	Fetal Adrenal Gland	H3K27me3	E080-H3K27me3.broadPeak.gz	rs1633768,rs1860826,rs2853677,rs60833263,rs7705526,rs7713981,rs77249081,rs9864772	E080	0.359
1.488	0.112	E080 Fetal Adrenal Gland	Fetal Adrenal Gland	H3K36me3	E080-H3K36me3.broadPeak.gz	rs1327494,rs17879961,rs1800057,rs1860826,rs60833263,rs7310615,rs8002412,rs9864772	E080	0.369
0.07	0.546	E081 Fetal Brain Male	Fetal Brain	H3K4me1	E081-H3K4me1.broadPeak.gz	rs1633768,rs1860826,rs74676712,rs9946154	E081	0.872
1.676	0.0836	E081 Fetal Brain Male	Fetal Brain	H3K4me3	E081-H3K4me3.broadPeak.gz	rs250763,rs74676712,rs9946154	E081	0.332
0.033	0.544	E081 Fetal Brain Male	Fetal Brain	H3K9me3	E081-H3K9me3.broadPeak.gz	rs12616536,rs1327494,rs250763	E081	0.872
0.519	0.373	E081 Fetal Brain Male	Fetal Brain	H3K27me3	E081-H3K27me3.broadPeak.gz	rs1633768,rs7713981,rs9847631,rs9946154	E081	0.706
0.212	0.498	E081 Fetal Brain Male	Fetal Brain	H3K36me3	E081-H3K36me3.broadPeak.gz	rs17879961,rs1800057,rs8002412,rs9847631	E081	0.866
0.059	0.555	E082 Fetal Brain Female	Fetal Brain	H3K4me1	E082-H3K4me1.broadPeak.gz	rs1860826,rs62329718,rs7310615,rs74676712,rs9946154	E082	0.88
-2.258	1	E082 Fetal Brain Female	Fetal Brain	H3K4me3	E082-H3K4me3.broadPeak.gz		E082	1
-0.414	0.699	E082 Fetal Brain Female	Fetal Brain	H3K9me3	E082-H3K9me3.broadPeak.gz	rs12616536,rs1327494	E082	1
0.474	0.391	E082 Fetal Brain Female	Fetal Brain	H3K27me3	E082-H3K27me3.broadPeak.gz	rs1633768,rs60833263,rs77249081,rs9847631,rs9946154	E082	0.726
-0.729	0.832	E082 Fetal Brain Female	Fetal Brain	H3K36me3	E082-H3K36me3.broadPeak.gz	rs1327494,rs17879961,rs1800057	E082	1
0.913	0.247	E083 Fetal Heart	Fetal Heart	H3K4me1	E083-H3K4me1.broadPeak.gz	rs12616536,rs250763,rs60833263,rs74676712,rs7713981,rs9946154	E083	0.573
-0.357	0.714	E083 Fetal Heart	Fetal Heart	H3K4me3	E083-H3K4me3.broadPeak.gz	rs144202762,rs250763,rs60833263,rs74676712	E083	1
-1.236	0.926	E083 Fetal Heart	Fetal Heart	H3K9me3	E083-H3K9me3.broadPeak.gz	rs12616536,rs144202762,rs1800057,rs9847631,rs9946154	E083	1
-0.931	0.884	E083 Fetal Heart	Fetal Heart	H3K27me3	E083-H3K27me3.broadPeak.gz	rs17099613,rs55857134	E083	1
-1.116	0.914	E083 Fetal Heart	Fetal Heart	H3K36me3	E083-H3K36me3.broadPeak.gz	rs17879961,rs1800057,rs250763,rs9847631	E083	1
1.145	0.192	E084 Fetal Intestine Large	Fetal Intestine Large	H3K4me1	E084-H3K4me1.broadPeak.gz	rs1633768,rs250763,rs60833263,rs7310615,rs74676712,rs7713981,rs9946154	E084	0.492
0.506	0.281	E084 Fetal Intestine Large	Fetal Intestine Large	H3K4me3	E084-H3K4me3.broadPeak.gz	rs62329718,rs74676712	E084	0.61
1.634	0.0885	E084 Fetal Intestine Large	Fetal Intestine Large	H3K9me3	E084-H3K9me3.broadPeak.gz	rs116466979,rs1327494,rs144202762,rs1633768,rs1860826,rs60833263,rs7310615,rs75405916,rs7705526	E084	0.332
-1.237	0.93	E084 Fetal Intestine Large	Fetal Intestine Large	H3K27me3	E084-H3K27me3.broadPeak.gz	rs1633768,rs17099613,rs55857134,rs9946154	E084	1
0.954	0.235	E084 Fetal Intestine Large	Fetal Intestine Large	H3K36me3	E084-H3K36me3.broadPeak.gz	rs12616536,rs17879961,rs1800057,rs60833263,rs7310615,rs8002412,rs9847631	E084	0.56
-0.474	0.748	E086 Fetal Kidney	Fetal Kidney	H3K4me1	E086-H3K4me1.broadPeak.gz	rs60833263,rs9847631,rs9946154	E086	1
1.259	0.163	E086 Fetal Kidney	Fetal Kidney	H3K4me3	E086-H3K4me3.broadPeak.gz	rs55857134,rs74676712,rs9946154	E086	0.447
-1.622	0.978	E086 Fetal Kidney	Fetal Kidney	H3K9me3	E086-H3K9me3.broadPeak.gz	rs12616536	E086	1
-2.188	1	E086 Fetal Kidney	Fetal Kidney	H3K27me3	E086-H3K27me3.broadPeak.gz		E086	1
1.54	0.114	E086 Fetal Kidney	Fetal Kidney	H3K36me3	E086-H3K36me3.broadPeak.gz	rs12616536,rs1327494,rs17879961,rs1800057,rs8002412,rs9847631	E086	0.371
1.029	0.208	E088 Fetal Lung	Fetal Lung	H3K4me1	E088-H3K4me1.broadPeak.gz	rs1633768,rs1860826,rs250763,rs60833263,rs74676712,rs7713981,rs9847631,rs9946154	E088	0.521
1.312	0.153	E088 Fetal Lung	Fetal Lung	H3K4me3	E088-H3K4me3.broadPeak.gz	rs1327494,rs17879961,rs1800057,rs250763,rs74676712,rs9847631,rs9946154	E088	0.432
-1.495	0.973	E088 Fetal Lung	Fetal Lung	H3K9me3	E088-H3K9me3.broadPeak.gz	rs1800057,rs74676712	E088	1
-2.379	0.999	E088 Fetal Lung	Fetal Lung	H3K27me3	E088-H3K27me3.broadPeak.gz	rs17099613	E088	1
0.614	0.339	E088 Fetal Lung	Fetal Lung	H3K36me3	E088-H3K36me3.broadPeak.gz	rs12616536,rs17879961,rs1800057,rs60833263,rs74676712,rs8002412,rs9847631	E088	0.694
2.177	0.0493	E090 Fetal Muscle Leg	Fetal Muscle Leg	H3K4me1	E090-H3K4me1.broadPeak.gz	rs12616536,rs1633768,rs17099613,rs1860826,rs250763,rs60833263,rs7310615,rs7713981,rs9946154	E090	0.278
-0.549	0.513	E090 Fetal Muscle Leg	Fetal Muscle Leg	H3K4me3	E090-H3K4me3.broadPeak.gz	rs74676712	E090	0.872
-1.91	1	E090 Fetal Muscle Leg	Fetal Muscle Leg	H3K9me3	E090-H3K9me3.broadPeak.gz		E090	1
1.96	0.0763	E090 Fetal Muscle Leg	Fetal Muscle Leg	H3K27me3	E090-H3K27me3.broadPeak.gz	rs116466979,rs12616536,rs1633768,rs17099613,rs1860826,rs250763,rs2853677,rs60833263,rs7310615,rs7705526,rs7713981	E090	0.331
0.994	0.224	E090 Fetal Muscle Leg	Fetal Muscle Leg	H3K36me3	E090-H3K36me3.broadPeak.gz	rs12616536,rs1327494,rs17879961,rs1800057,rs60833263,rs7310615,rs8002412	E090	0.553
2.406	0.0414	E089 Fetal Muscle Trunk	Fetal Muscle Trunk	H3K4me1	E089-H3K4me1.broadPeak.gz	rs1633768,rs17099613,rs1860826,rs250763,rs60833263,rs62471615,rs7310615,rs7713981,rs9864772	E089	0.269
-2.05	1	E089 Fetal Muscle Trunk	Fetal Muscle Trunk	H3K4me3	E089-H3K4me3.broadPeak.gz		E089	1
-0.65	0.785	E089 Fetal Muscle Trunk	Fetal Muscle Trunk	H3K9me3	E089-H3K9me3.broadPeak.gz	rs12616536,rs1327494	E089	1
2.023	0.0809	E089 Fetal Muscle Trunk	Fetal Muscle Trunk	H3K27me3	E089-H3K27me3.broadPeak.gz	rs1633768,rs17099613,rs1860826,rs2853677,rs60833263,rs7310615,rs7713981	E089	0.332
0.592	0.35	E089 Fetal Muscle Trunk	Fetal Muscle Trunk	H3K36me3	E089-H3K36me3.broadPeak.gz	rs12616536,rs17879961,rs1800057,rs1860826,rs8002412	E089	0.694
2.779	0.0103	E092 Fetal Stomach	Fetal Stomach	H3K4me1	E092-H3K4me1.broadPeak.gz	rs12616536,rs1633768,rs17099613,rs1860826,rs250763,rs60833263,rs7310615,rs74676712,rs7713981,rs9847631,rs9864772,rs9946154	E092	0.091
0.377	0.311	E092 Fetal Stomach	Fetal Stomach	H3K4me3	E092-H3K4me3.broadPeak.gz	rs74676712,rs9946154	E092	0.659
0.996	0.251	E092 Fetal Stomach	Fetal Stomach	H3K9me3	E092-H3K9me3.broadPeak.gz	rs12616536,rs1327494,rs1633768,rs17099613,rs60833263,rs7310615,rs7713981,rs77249081,rs9864772	E092	0.573
2.272	0.0514	E092 Fetal Stomach	Fetal Stomach	H3K27me3	E092-H3K27me3.broadPeak.gz	rs116466979,rs1633768,rs17099613,rs1860826,rs60833263,rs7310615,rs7705526,rs7713981,rs77249081,rs9864772	E092	0.278
1.75	0.0864	E092 Fetal Stomach	Fetal Stomach	H3K36me3	E092-H3K36me3.broadPeak.gz	rs12616536,rs1327494,rs17879961,rs1860826,rs60833263,rs7310615,rs8002412	E092	0.332
3.566	0.00258	E093 Fetal Thymus	Fetal Thymus	H3K4me1	E093-H3K4me1.broadPeak.gz	rs12616536,rs1633768,rs17099613,rs1860826,rs250763,rs2853677,rs55857134,rs60833263,rs7310615,rs7713981,rs9946154	E093	0.0482
1.933	0.0724	E093 Fetal Thymus	Fetal Thymus	H3K4me3	E093-H3K4me3.broadPeak.gz	rs144202762,rs1860826,rs250763,rs60833263,rs74676712	E093	0.321
1.721	0.0997	E093 Fetal Thymus	Fetal Thymus	H3K9me3	E093-H3K9me3.broadPeak.gz	rs116466979,rs1327494,rs1633768,rs1860826,rs2853677,rs60833263,rs62471615,rs74676712,rs7705526,rs7713981,rs77249081,rs9864772	E093	0.359
-1.161	0.921	E093 Fetal Thymus	Fetal Thymus	H3K27me3	E093-H3K27me3.broadPeak.gz	rs1633768,rs1860826,rs74676712	E093	1
2.921	0.00744	E093 Fetal Thymus	Fetal Thymus	H3K36me3	E093-H3K36me3.broadPeak.gz	rs1327494,rs17879961,rs1800057,rs1860826,rs2853677,rs55857134,rs60833263,rs7310615,rs7705526,rs8002412,rs9864772	E093	0.0838
2.213	0.0382	E094 Gastric	Gastric	H3K4me1	E094-H3K4me1.broadPeak.gz	rs12616536,rs1633768,rs250763,rs2853677,rs60833263,rs62471615,rs7310615,rs7705526,rs7713981,rs77249081,rs9946154	E094	0.257
-0.003	0.578	E094 Gastric	Gastric	H3K4me3	E094-H3K4me3.broadPeak.gz	rs1860826,rs250763,rs60833263,rs7310615,rs7713981	E094	0.892
-1.63	0.972	E094 Gastric	Gastric	H3K9me3	E094-H3K9me3.broadPeak.gz	rs12616536,rs2853677,rs7713981	E094	1
-0.013	0.581	E094 Gastric	Gastric	H3K27me3	E094-H3K27me3.broadPeak.gz	rs116466979,rs1633768,rs17099613,rs17879961,rs250763,rs60833263,rs77249081,rs9946154	E094	0.892
1.873	0.0708	E094 Gastric	Gastric	H3K36me3	E094-H3K36me3.broadPeak.gz	rs12616536,rs1327494,rs1633768,rs60833263,rs62471615,rs7310615,rs7705526,rs7713981,rs9864772	E094	0.321
1.44	0.122	E021 iPS DF 6.9 Cells	IPS cell	H3K4me1	E021-H3K4me1.broadPeak.gz	rs1633768,rs17099613,rs1860826,rs250763,rs60833263,rs7310615,rs7713981,rs9864772,rs9946154	E021	0.39
-0.613	0.78	E021 iPS DF 6.9 Cells	IPS cell	H3K4me3	E021-H3K4me3.broadPeak.gz	rs1860826,rs74676712	E021	1
-1.183	0.908	E021 iPS DF 6.9 Cells	IPS cell	H3K9me3	E021-H3K9me3.broadPeak.gz	rs250763	E021	1
1.34	0.145	E021 iPS DF 6.9 Cells	IPS cell	H3K27me3	E021-H3K27me3.broadPeak.gz	rs1633768,rs1860826,rs250763,rs2853677,rs74676712,rs7705526,rs7713981,rs77249081	E021	0.428
1.341	0.148	E021 iPS DF 6.9 Cells	IPS cell	H3K36me3	E021-H3K36me3.broadPeak.gz	rs17879961,rs1800057,rs2853677,rs60833263,rs7310615,rs7705526,rs77249081,rs9864772	E021	0.43
1.973	0.0815	E022 iPS DF 19.11 Cells	IPS cell	H3K4me1	E022-H3K4me1.broadPeak.gz	rs1633768,rs17099613,rs1860826,rs2853677,rs60833263,rs7310615,rs7713981,rs9864772	E022	0.332
2.848	0.0296	E022 iPS DF 19.11 Cells	IPS cell	H3K4me3	E022-H3K4me3.broadPeak.gz	rs1633768,rs17099613,rs1860826,rs60833263,rs9864772	E022	0.222
-0.346	0.693	E022 iPS DF 19.11 Cells	IPS cell	H3K9me3	E022-H3K9me3.broadPeak.gz	rs1860826,rs2853677,rs60833263,rs7713981	E022	1
1.465	0.131	E022 iPS DF 19.11 Cells	IPS cell	H3K27me3	E022-H3K27me3.broadPeak.gz	rs116466979,rs144202762,rs1633768,rs1800057,rs250763,rs2853677,rs7310615	E022	0.411
1.327	0.184	E022 iPS DF 19.11 Cells	IPS cell	H3K36me3	E022-H3K36me3.broadPeak.gz	rs12616536,rs1633768,rs17099613,rs1860826,rs2853677,rs60833263,rs7310615,rs7705526,rs7713981,rs9864772	E022	0.486
2.081	0.048	E017 IMR90 fetal lung fibroblasts Cell Line	Lung	H3K4me1	E017-H3K4me1.broadPeak.gz	rs1633768,rs250763,rs62471615,rs7310615,rs74676712,rs9847631,rs9864772,rs9946154	E017	0.278
-0.252	0.247	E017 IMR90 fetal lung fibroblasts Cell Line	Lung	H3K4me3	E017-H3K4me3.broadPeak.gz	rs74676712	E017	0.573
-0.567	0.775	E017 IMR90 fetal lung fibroblasts Cell Line	Lung	H3K9me3	E017-H3K9me3.broadPeak.gz	rs1327494,rs1800057,rs60833263,rs7705526,rs7713981	E017	1
-1.171	0.919	E017 IMR90 fetal lung fibroblasts Cell Line	Lung	H3K27me3	E017-H3K27me3.broadPeak.gz	rs1633768,rs17099613,rs7713981	E017	1
3.284	0.00474	E017 IMR90 fetal lung fibroblasts Cell Line	Lung	H3K36me3	E017-H3K36me3.broadPeak.gz	rs12616536,rs1327494,rs17879961,rs1800057,rs1860826,rs60833263,rs62471615,rs7310615,rs8002412,rs9946154	E017	0.0711
-1.039	0.89	E097 Ovary	Ovary	H3K4me1	E097-H3K4me1.broadPeak.gz	rs17099613,rs250763,rs62471615,rs9946154	E097	1
-1.927	1	E097 Ovary	Ovary	H3K4me3	E097-H3K4me3.broadPeak.gz		E097	1
-1.629	0.966	E097 Ovary	Ovary	H3K9me3	E097-H3K9me3.broadPeak.gz	rs1633768,rs2853677,rs7713981,rs77249081	E097	1
-0.585	0.784	E097 Ovary	Ovary	H3K27me3	E097-H3K27me3.broadPeak.gz	rs1633768,rs17879961,rs55857134,rs77249081,rs9847631,rs9864772	E097	1
-1.588	0.97	E097 Ovary	Ovary	H3K36me3	E097-H3K36me3.broadPeak.gz	rs1327494,rs17879961,rs2853677	E097	1
2.997	0.0101	E098 Pancreas	Pancreas	H3K4me1	E098-H3K4me1.broadPeak.gz	rs12616536,rs1860826,rs250763,rs2853677,rs60833263,rs7310615,rs74676712,rs7705526,rs7713981,rs77249081,rs9864772,rs9946154	E098	0.091
0.086	0.526	E098 Pancreas	Pancreas	H3K4me3	E098-H3K4me3.broadPeak.gz	rs1633768,rs7713981,rs77249081	E098	0.872
-0.922	0.858	E098 Pancreas	Pancreas	H3K9me3	E098-H3K9me3.broadPeak.gz	rs116466979,rs1860826,rs2853677,rs7705526,rs77249081	E098	1
0.129	0.526	E098 Pancreas	Pancreas	H3K27me3	E098-H3K27me3.broadPeak.gz	rs1327494,rs1633768,rs1860826,rs250763,rs60833263,rs77249081,rs8002412,rs9946154	E098	0.872
0.144	0.524	E098 Pancreas	Pancreas	H3K36me3	E098-H3K36me3.broadPeak.gz	rs1327494,rs1860826,rs60833263,rs7705526,rs7713981,rs77249081	E098	0.872
3.878	0.00198	E091 Placenta	Placenta	H3K4me1	E091-H3K4me1.broadPeak.gz	rs12616536,rs1633768,rs17099613,rs250763,rs60833263,rs62471615,rs7310615,rs7713981,rs9864772,rs9946154	E091	0.0428
-0.669	0.597	E091 Placenta	Placenta	H3K4me3	E091-H3K4me3.broadPeak.gz	rs1633768	E091	0.903
0.278	0.475	E091 Placenta	Placenta	H3K9me3	E091-H3K9me3.broadPeak.gz	rs12616536,rs60833263,rs7705526,rs7713981,rs77249081	E091	0.835
0.607	0.365	E091 Placenta	Placenta	H3K27me3	E091-H3K27me3.broadPeak.gz	rs1633768,rs17099613,rs1860826,rs60833263,rs7713981,rs9864772	E091	0.704
0.963	0.23	E091 Placenta	Placenta	H3K36me3	E091-H3K36me3.broadPeak.gz	rs1327494,rs17879961,rs1800057,rs62471615,rs7310615,rs8002412	E091	0.553
-0.191	0.649	E100 Psoas Muscle	Psoas Muscle	H3K4me1	E100-H3K4me1.broadPeak.gz	rs12616536,rs1860826,rs62471615,rs74676712,rs9946154	E100	0.965
0.21	0.404	E100 Psoas Muscle	Psoas Muscle	H3K4me3	E100-H3K4me3.broadPeak.gz	rs74676712,rs9946154	E100	0.74
-2.062	0.993	E100 Psoas Muscle	Psoas Muscle	H3K9me3	E100-H3K9me3.broadPeak.gz	rs144202762,rs77249081	E100	1
-0.433	0.737	E100 Psoas Muscle	Psoas Muscle	H3K27me3	E100-H3K27me3.broadPeak.gz	rs116466979,rs17099613,rs250763,rs55857134,rs7705526,rs77249081	E100	1
-0.311	0.693	E100 Psoas Muscle	Psoas Muscle	H3K36me3	E100-H3K36me3.broadPeak.gz	rs1327494,rs17879961,rs1800057,rs55857134,rs62471615,rs8002412	E100	1
2.446	0.0199	E055 Foreskin Fibroblast Primary Cells skin01	Skin	H3K4me1	E055-H3K4me1.broadPeak.gz	rs12616536,rs17099613,rs1860826,rs250763,rs55857134,rs7310615,rs74676712,rs77249081,rs9847631,rs9864772,rs9946154	E055	0.162
2.262	0.0473	E055 Foreskin Fibroblast Primary Cells skin01	Skin	H3K4me3	E055-H3K4me3.broadPeak.gz	rs250763,rs7310615,rs74676712,rs9864772,rs9946154	E055	0.278
-1.197	0.916	E055 Foreskin Fibroblast Primary Cells skin01	Skin	H3K9me3	E055-H3K9me3.broadPeak.gz	rs144202762,rs75405916,rs7705526,rs7713981	E055	1
1.391	0.14	E055 Foreskin Fibroblast Primary Cells skin01	Skin	H3K27me3	E055-H3K27me3.broadPeak.gz	rs12616536,rs1633768,rs17099613,rs1860826,rs2853677,rs60833263,rs7705526,rs7713981,rs77249081,rs9864772	E055	0.425
2.843	0.00717	E055 Foreskin Fibroblast Primary Cells skin01	Skin	H3K36me3	E055-H3K36me3.broadPeak.gz	rs12616536,rs1327494,rs17099613,rs17879961,rs1800057,rs1860826,rs60833263,rs62471615,rs7310615,rs7713981,rs77249081,rs8002412	E055	0.0838
3.583	0.00137	E056 Foreskin Fibroblast Primary Cells skin02	Skin	H3K4me1	E056-H3K4me1.broadPeak.gz	rs12616536,rs1633768,rs17099613,rs1860826,rs250763,rs2853677,rs55857134,rs60833263,rs7310615,rs74676712,rs7713981,rs77249081,rs9847631,rs9864772,rs9946154	E056	0.0333
4.387	0.000894	E056 Foreskin Fibroblast Primary Cells skin02	Skin	H3K4me3	E056-H3K4me3.broadPeak.gz	rs1633768,rs17099613,rs1860826,rs250763,rs60833263,rs7310615,rs74676712,rs7713981,rs77249081,rs9946154	E056	0.0294
-0.603	0.785	E056 Foreskin Fibroblast Primary Cells skin02	Skin	H3K9me3	E056-H3K9me3.broadPeak.gz	rs144202762,rs1633768,rs60833263,rs7705526,rs7713981	E056	1
1.408	0.159	E056 Foreskin Fibroblast Primary Cells skin02	Skin	H3K27me3	E056-H3K27me3.broadPeak.gz	rs12616536,rs1633768,rs17099613,rs1860826,rs2853677,rs60833263,rs7310615,rs7705526,rs7713981,rs77249081	E056	0.444
1.921	0.06	E056 Foreskin Fibroblast Primary Cells skin02	Skin	H3K36me3	E056-H3K36me3.broadPeak.gz	rs12616536,rs1633768,rs1800057,rs1860826,rs55857134,rs60833263,rs62471615,rs7310615,rs7713981,rs77249081,rs9847631	E056	0.285
0.794	0.296	E057 Foreskin Keratinocyte Primary Cells skin02	Skin	H3K4me1	E057-H3K4me1.broadPeak.gz	rs1633768,rs17099613,rs250763,rs74676712,rs7713981	E057	0.634
4.674	0.00272	E057 Foreskin Keratinocyte Primary Cells skin02	Skin	H3K4me3	E057-H3K4me3.broadPeak.gz	rs17099613,rs250763,rs74676712,rs9864772	E057	0.0482
0.447	0.406	E057 Foreskin Keratinocyte Primary Cells skin02	Skin	H3K9me3	E057-H3K9me3.broadPeak.gz	rs116466979,rs1800057,rs2853677,rs75405916,rs7705526,rs7713981,rs9847631	E057	0.74
0.11	0.537	E057 Foreskin Keratinocyte Primary Cells skin02	Skin	H3K27me3	E057-H3K27me3.broadPeak.gz	rs1633768,rs17099613,rs60833263,rs7705526,rs7713981	E057	0.872
1.926	0.0598	E057 Foreskin Keratinocyte Primary Cells skin02	Skin	H3K36me3	E057-H3K36me3.broadPeak.gz	rs1327494,rs17879961,rs1800057,rs1860826,rs62471615,rs7310615,rs8002412,rs9847631	E057	0.285
1.95	0.0584	E059 Foreskin Melanocyte Primary Cells skin01	Skin	H3K4me1	E059-H3K4me1.broadPeak.gz	rs1633768,rs17099613,rs1860826,rs250763,rs60833263,rs7310615,rs74676712,rs7713981,rs9946154	E059	0.285
5.224	0.000176	E059 Foreskin Melanocyte Primary Cells skin01	Skin	H3K4me3	E059-H3K4me3.broadPeak.gz	rs116466979,rs12616536,rs1633768,rs1860826,rs60833263,rs7310615,rs74676712,rs7705526,rs7713981,rs9864772	E059	0.0114
1.477	0.139	E059 Foreskin Melanocyte Primary Cells skin01	Skin	H3K9me3	E059-H3K9me3.broadPeak.gz	rs12616536,rs17099613,rs1860826,rs250763,rs2853677,rs7705526,rs7713981,rs9864772	E059	0.425
0.681	0.335	E059 Foreskin Melanocyte Primary Cells skin01	Skin	H3K27me3	E059-H3K27me3.broadPeak.gz	rs12616536,rs1633768,rs17099613,rs2853677,rs7705526,rs7713981,rs77249081	E059	0.694
3.755	0.00103	E059 Foreskin Melanocyte Primary Cells skin01	Skin	H3K36me3	E059-H3K36me3.broadPeak.gz	rs12616536,rs1327494,rs1633768,rs17099613,rs1800057,rs1860826,rs250763,rs60833263,rs7310615,rs7713981,rs77249081,rs8002412,rs9864772	E059	0.0294
0.571	0.356	E109 Small Intestine	Small Intestine	H3K4me1	E109-H3K4me1.broadPeak.gz	rs250763,rs55857134,rs60833263,rs62471615,rs7310615,rs74676712,rs7713981,rs8002412	E109	0.694
-0.397	0.73	E109 Small Intestine	Small Intestine	H3K4me3	E109-H3K4me3.broadPeak.gz	rs144202762,rs17099613,rs17879961,rs55857134	E109	1
0.342	0.435	E109 Small Intestine	Small Intestine	H3K9me3	E109-H3K9me3.broadPeak.gz	rs116466979,rs144202762,rs250763,rs55857134,rs60833263,rs74676712,rs77249081,rs8002412	E109	0.786
-0.388	0.712	E109 Small Intestine	Small Intestine	H3K27me3	E109-H3K27me3.broadPeak.gz	rs1633768,rs17099613,rs2853677,rs7705526,rs7713981,rs77249081	E109	1
-0.944	0.868	E109 Small Intestine	Small Intestine	H3K36me3	E109-H3K36me3.broadPeak.gz	rs1800057,rs2853677,rs60833263,rs7310615,rs7713981	E109	1
FORGE2 enrichment Zscore: Z-score of the overlap count of the input data versus the background.
FORGE2 enrichment Pvalue: P-value of the overlap count of the input data versus the background.
Cell: cell type in which the enrichment is being computed.
Tissue: tissue annotation according to either ENCODE, Roadmap Epigenomics, BLUEPRINT, or BioSamples.
Datatype: type of epigenomic track analysed.
File: file name for the specific epigenomic track analysed.
Probe: The specific SNPs that overlap epigenomic tracks in that file.
Accession: GEO accession number of the sample or dataset.
FORGE2 enrichment Qvalue: Q-value of the overlap count of the input data versus the background.
Input SNPs for analysis:
rs12616536
rs75405916
rs9864772
rs77249081
rs74676712
rs9847631
rs62329718
rs60833263
rs7713981
rs7705526
rs2853677
rs250763
rs116466979
rs1860826
rs62471615
rs1327494
rs1633768
rs1800057
rs7310615
rs8002412
rs144202762
rs17099613
rs9946154
rs55857134
rs17879961
