# Supplementary material for: Integrative analysis of 3604 GWAS reveals multiple novel cell type-specific regulatory associations
Source: Genome Biol. 2022 Jan 7;23:13. doi: 10.1186/s13059-021-02560-3 (PMC8742386; doi:10.1186/s13059-021-02560-3)
Supplement: Supplementary file 13 — Additional file 13: Table S12. FORGE2 DNase I hotspot analysis results (q-values) for a set of 25 variants from a GWAS on myeloproliferative neoplasms. [file 13059_2021_2560_MOESM13_ESM.xlsx]

## Sheet: Table S12. MPNs_example.analysi
Table S12: FORGE2 DNase I hotspot analysis results (q-values) for a set of 25 variants from a GWAS on myeloproliferative neoplasms:
FORGE2 enrichment Zscore	FORGE2 enrichment Pvalue	Cell	Tissue	Datatype	File	Probe	Accession	FORGE2 enrichment Qvalue
-0.519	0.421	CD3	Blood	DHS	UW.CD3_Primary_Cells.ChromatinAccessibility.CB1_1-3-2011.DS17702.twopass.merge150.wgt10.zgt2.wig.gz	rs250763	GSM701525	0.604
-0.441	0.397	CD3	Blood	DHS	UW.CD3_Primary_Cells.ChromatinAccessibility.CB6_1-4-2011.DS17706.twopass.merge150.wgt10.zgt2.wig.gz	rs12616536	GSM701526	0.604
-0.472	0.422	CD3	Blood	DHS	UW.CD3_Primary_Cells.ChromatinAccessibility.RO_01679.DS17198.twopass.merge150.wgt10.zgt2.wig.gz	rs74676712	GSM665837	0.604
1.966	0.0601	CD3	Blood	DHS	UW.CD3_Primary_Cells.ChromatinAccessibility.RO_01701.DS17534.twopass.merge150.wgt10.zgt2.wig.gz	rs250763,rs55857134,rs74676712	GSM701516	0.428
3.325	0.0109	CD4_Mobilised;	Blood	DHS	UW.Mobilized_CD4_Primary_Cells.ChromatinAccessibility.RO_01679.DS16955.twopass.merge150.wgt10.zgt2.wig.gz	rs1860826,rs250763,rs55857134,rs74676712	GSM701489	0.326
-0.607	0.545	CD4_Mobilised;	Blood	DHS	UW.Mobilized_CD4_Primary_Cells.ChromatinAccessibility.RO_01701.DS17175.twopass.merge150.wgt10.zgt2.wig.gz	rs55857134	GSM701491	0.689
-0.649	0.568	CD4	Blood	DHS	UW.CD4_Primary_Cells.ChromatinAccessibility.RO_01549.DS15947.twopass.merge150.wgt10.zgt2.wig.gz	rs250763	GSM665812	0.708
-0.539	0.472	CD4	Blood	DHS	UW.CD4_Primary_Cells.ChromatinAccessibility.RO_01679.DS17212.twopass.merge150.wgt10.zgt2.wig.gz	rs250763	GSM665839	0.629
0.837	0.209	CD4	Blood	DHS	UW.CD4_Primary_Cells.ChromatinAccessibility.RO_01689.DS17329.twopass.merge150.wgt10.zgt2.wig.gz	rs250763,rs55857134	GSM817166	0.501
-2.631	1	CD4	Blood	DHS	UW.CD4_Primary_Cells.ChromatinAccessibility.RO_01701.DS17881.twopass.merge150.wgt10.zgt2.wig.gz		GSM701539	1
0.751	0.207	CD8_Mobilised;	Blood	DHS	UW.Mobilized_CD8_Primary_Cells.ChromatinAccessibility.RO_01679.DS16962.twopass.merge150.wgt10.zgt2.wig.gz	rs250763,rs74676712	GSM817160	0.501
-1.939	1	CD8	Blood	DHS	UW.CD8_Primary_Cells.ChromatinAccessibility.RO_01549.DS16012.twopass.merge150.wgt10.zgt2.wig.gz		GSM665813	1
-2.931	1	CD8	Blood	DHS	UW.CD8_Primary_Cells.ChromatinAccessibility.RO_01679.DS17203.twopass.merge150.wgt10.zgt2.wig.gz		GSM665838	1
-2.114	1	CD8	Blood	DHS	UW.CD8_Primary_Cells.ChromatinAccessibility.RO_01689.DS17332.twopass.merge150.wgt10.zgt2.wig.gz		GSM701499	1
-2.677	1	CD8	Blood	DHS	UW.CD8_Primary_Cells.ChromatinAccessibility.RO_01701.DS17885.twopass.merge150.wgt10.zgt2.wig.gz		GSM701540	1
-0.51	0.459	CD14	Blood	DHS	UW.CD14_Primary_Cells.ChromatinAccessibility.RO_01689.DS17391.twopass.merge150.wgt10.zgt2.wig.gz	rs7713981	GSM701503	0.627
-0.596	0.464	CD14	Blood	DHS	UW.CD14_Primary_Cells.ChromatinAccessibility.RO_01701.DS17889.twopass.merge150.wgt10.zgt2.wig.gz	rs250763	GSM701541	0.629
2.597	0.036	CD19	Blood	DHS	UW.CD19_Primary_Cells.ChromatinAccessibility.RO_01679.DS17186.twopass.merge150.wgt10.zgt2.wig.gz	rs12616536,rs1860826,rs7713981	GSM701492	0.428
1.095	0.134	CD19	Blood	DHS	UW.CD19_Primary_Cells.ChromatinAccessibility.RO_01689.DS17281.twopass.merge150.wgt10.zgt2.wig.gz	rs12616536,rs250763	GSM701493	0.5
0.928	0.176	CD19	Blood	DHS	UW.CD19_Primary_Cells.ChromatinAccessibility.RO_01701.DS17440.twopass.merge150.wgt10.zgt2.wig.gz	rs1860826,rs74676712	GSM701507	0.5
3.005	0.0263	CD20	Blood	DHS	UW.CD20_Primary_Cells.ChromatinAccessibility.RO_01778.DS17371.twopass.merge150.wgt10.zgt2.wig.gz	rs250763,rs74676712,rs7713981,rs9946154	GSM701500	0.428
0.958	0.151	CD34_Mobilised;	Blood	DHS	UW.Mobilized_CD34_Primary_Cells.ChromatinAccessibility.RO_00738.DS13199.twopass.merge150.wgt10.zgt2.wig.gz	rs1633768,rs9946154	GSM530664	0.5
-0.628	0.474	CD34_Mobilised;	Blood	DHS	UW.Mobilized_CD34_Primary_Cells.ChromatinAccessibility.RO_01480.DS12771.twopass.merge150.wgt10.zgt2.wig.gz	rs1633768	GSM530658	0.629
1.208	0.109	CD34_Mobilised;	Blood	DHS	UW.Mobilized_CD34_Primary_Cells.ChromatinAccessibility.RO_01492.DS12774.twopass.merge150.wgt10.zgt2.wig.gz	rs1633768,rs9946154	GSM530659	0.499
2.543	0.0355	CD34_Mobilised;	Blood	DHS	UW.Mobilized_CD34_Primary_Cells.ChromatinAccessibility.RO_01492.DS14206.twopass.merge150.wgt10.zgt2.wig.gz	rs1633768,rs60833263,rs9946154	GSM595919	0.428
0.765	0.172	CD34_Mobilised;	Blood	DHS	UW.Mobilized_CD34_Primary_Cells.ChromatinAccessibility.RO_01508.DS11202.twopass.merge150.wgt10.zgt2.wig.gz	rs1633768,rs9946154	GSM493386	0.5
5.235	0.000964	CD34_Mobilised;	Blood	DHS	UW.Mobilized_CD34_Primary_Cells.ChromatinAccessibility.RO_01517.DS14129.twopass.merge150.wgt10.zgt2.wig.gz	rs1633768,rs17099613,rs250763,rs9864772,rs9946154	GSM595917	0.096
-0.611	0.509	CD34_Mobilised;	Blood	DHS	UW.Mobilized_CD34_Primary_Cells.ChromatinAccessibility.RO_01520.DS12785.twopass.merge150.wgt10.zgt2.wig.gz	rs1633768	GSM530660	0.664
1.075	0.167	CD34_Mobilised;	Blood	DHS	UW.Mobilized_CD34_Primary_Cells.ChromatinAccessibility.RO_01527.DS11666.twopass.merge150.wgt10.zgt2.wig.gz	rs1633768,rs9946154	GSM493387	0.5
-0.585	0.473	CD34_Mobilised;	Blood	DHS	UW.Mobilized_CD34_Primary_Cells.ChromatinAccessibility.RO_01535.DS12274.twopass.merge150.wgt10.zgt2.wig.gz	rs1633768	GSM493384	0.629
0.908	0.179	CD34_Mobilised;	Blood	DHS	UW.Mobilized_CD34_Primary_Cells.ChromatinAccessibility.RO_01535.DS14197.twopass.merge150.wgt10.zgt2.wig.gz	rs1633768,rs9946154	GSM595918	0.5
8.265	2.87e-05	CD34_Mobilised;	Blood	DHS	UW.Mobilized_CD34_Primary_Cells.ChromatinAccessibility.RO_01536.DS12339.twopass.merge150.wgt10.zgt2.wig.gz	rs1633768,rs250763,rs60833263,rs7713981,rs9864772,rs9946154	GSM530652	0.00858
3.667	0.00843	CD34_Mobilised;	Blood	DHS	UW.Mobilized_CD34_Primary_Cells.ChromatinAccessibility.RO_01549.DS12734.twopass.merge150.wgt10.zgt2.wig.gz	rs1633768,rs250763,rs9864772,rs9946154	GSM530657	0.315
-0.61	0.491	CD34_Mobilised;	Blood	DHS	UW.Mobilized_CD34_Primary_Cells.ChromatinAccessibility.RO_01562.DS13196.twopass.merge150.wgt10.zgt2.wig.gz	rs1633768	GSM530663	0.644
2.22	0.0519	CD34_Mobilised;	Blood	DHS	UW.Mobilized_CD34_Primary_Cells.ChromatinAccessibility.RO_01701.DS17112.twopass.merge150.wgt10.zgt2.wig.gz	rs1633768,rs9864772,rs9946154	GSM774208	0.428
0.618	0.265	CD56_Mobilised;	Blood	DHS	UW.Mobilized_CD56_Primary_Cells.ChromatinAccessibility.RO_01689.DS16376.twopass.merge150.wgt10.zgt2.wig.gz	rs250763,rs55857134	GSM665820	0.532
-0.454	0.357	CD56	Blood	DHS	UW.CD56_Primary_Cells.ChromatinAccessibility.RO_01679.DS17189.twopass.merge150.wgt10.zgt2.wig.gz	rs250763	GSM665836	0.594
-0.628	0.536	CD56	Blood	DHS	UW.CD56_Primary_Cells.ChromatinAccessibility.RO_01701.DS17443.twopass.merge150.wgt10.zgt2.wig.gz	rs74676712	GSM701508	0.682
-0.666	0.601	Breast_vHMEC	Breast	DHS	UW.Breast_vHMEC.ChromatinAccessibility.RM035.DS18406.twopass.merge150.wgt10.zgt2.wig.gz	rs250763	GSM753973	0.718
0.732	0.225	Breast_vHMEC	Breast	DHS	UW.Breast_vHMEC.ChromatinAccessibility.RM035.DS18438.twopass.merge150.wgt10.zgt2.wig.gz	rs250763,rs74676712	GSM753974	0.513
1.504	0.124	H1	ES Cell	DHS	UW.H1.ChromatinAccessibility.DS18873.twopass.merge150.wgt10.zgt2.wig.gz	rs1633768,rs60833263,rs7713981	GSM878616	0.5
-0.539	0.437	H1	ES Cell	DHS	UW.H1.ChromatinAccessibility.DS19100.twopass.merge150.wgt10.zgt2.wig.gz	rs1633768	GSM878621	0.614
2.46	0.0474	H9	ES Cell	DHS	UW.H9.ChromatinAccessibility.DS18517.twopass.merge150.wgt10.zgt2.wig.gz	rs1633768,rs250763,rs7713981,rs9946154	GSM878612	0.428
0.778	0.229	H9	ES Cell	DHS	UW.H9.ChromatinAccessibility.DS18522.twopass.merge150.wgt10.zgt2.wig.gz	rs1633768,rs7713981	GSM878613	0.52
-0.638	0.585	Mesenchymal_Stem_Cells	ES Cell	DHS	UW.H1_Derived_Mesenchymal_Stem_Cells.ChromatinAccessibility.DS20671.twopass.merge150.wgt10.zgt2.wig.gz	rs250763	GSM906380	0.714
2.948	0.0207	Mesenchymal_Stem_Cells	ES Cell	DHS	UW.H1_Derived_Mesenchymal_Stem_Cells.ChromatinAccessibility.DS21042.twopass.merge150.wgt10.zgt2.wig.gz	rs250763,rs55857134,rs74676712,rs9946154	GSM906381	0.428
0.502	0.252	Mesendoderm_Cultured_Cells	ES Cell	DHS	UW.H1_BMP4_Derived_Mesendoderm_Cultured_Cells.ChromatinAccessibility.DS18732.twopass.merge150.wgt10.zgt2.wig.gz	rs1633768,rs250763	GSM817198	0.53
-0.746	0.665	Mesendoderm_Cultured_Cells	ES Cell	DHS	UW.H1_BMP4_Derived_Mesendoderm_Cultured_Cells.ChromatinAccessibility.DS19310.twopass.merge150.wgt10.zgt2.wig.gz	rs1633768	GSM817215	0.771
0.99	0.177	Neuronal_Progenitor_Cultured_Cells	ES Cell	DHS	UW.H1_Derived_Neuronal_Progenitor_Cultured_Cells.ChromatinAccessibility.DS18739.twopass.merge150.wgt10.zgt2.wig.gz	rs1633768,rs60833263	GSM878615	0.5
1.739	0.0855	Neuronal_Progenitor_Cultured_Cells	ES Cell	DHS	UW.H1_Derived_Neuronal_Progenitor_Cultured_Cells.ChromatinAccessibility.DS20153.twopass.merge150.wgt10.zgt2.wig.gz	rs1633768,rs250763,rs60833263	GSM906379	0.499
-1.948	1	Trophoblast_Cultured_Cells	ES Cell	DHS	UW.H1_BMP4_Derived_Trophoblast_Cultured_Cells.ChromatinAccessibility.DS18736.twopass.merge150.wgt10.zgt2.wig.gz		GSM878614	1
-0.69	0.583	Trophoblast_Cultured_Cells	ES Cell	DHS	UW.H1_BMP4_Derived_Trophoblast_Cultured_Cells.ChromatinAccessibility.DS19317.twopass.merge150.wgt10.zgt2.wig.gz	rs250763	GSM878628	0.714
0.324	0.344	Fetal_Adrenal_Gland	Fetal Adrenal	DHS	UW.Fetal_Adrenal_Gland.ChromatinAccessibility.H-22662.DS12528.twopass.merge150.wgt10.zgt2.wig.gz	rs17099613,rs250763	GSM530653	0.594
0.623	0.238	Fetal_Adrenal_Gland	Fetal Adrenal	DHS	UW.Fetal_Adrenal_Gland.ChromatinAccessibility.H-23769.DS17319.twopass.merge150.wgt10.zgt2.wig.gz	rs250763,rs9946154	GSM817165	0.53
0.286	0.351	Fetal_Adrenal_Gland	Fetal Adrenal	DHS	UW.Fetal_Adrenal_Gland.ChromatinAccessibility.H-24409.DS20343.twopass.merge150.wgt10.zgt2.wig.gz	rs17099613,rs250763	GSM878658	0.594
-2.113	1	Fetal_Brain	Fetal Brain	DHS	UW.Fetal_Brain.ChromatinAccessibility.H-22510.DS11872.twopass.merge150.wgt10.zgt2.wig.gz		GSM530651	1
-0.644	0.574	Fetal_Brain	Fetal Brain	DHS	UW.Fetal_Brain.ChromatinAccessibility.H-22510.DS11877.twopass.merge150.wgt10.zgt2.wig.gz	rs62329718	GSM595913	0.709
-0.688	0.62	Fetal_Brain	Fetal Brain	DHS	UW.Fetal_Brain.ChromatinAccessibility.H-22911.DS14464.twopass.merge150.wgt10.zgt2.wig.gz	rs62329718	GSM595920	0.728
0.304	0.401	Fetal_Brain	Fetal Brain	DHS	UW.Fetal_Brain.ChromatinAccessibility.H-23266.DS14717.twopass.merge150.wgt10.zgt2.wig.gz	rs250763,rs9946154	GSM595922	0.604
-0.79	0.712	Fetal_Brain	Fetal Brain	DHS	UW.Fetal_Brain.ChromatinAccessibility.H-23266.DS14718.twopass.merge150.wgt10.zgt2.wig.gz	rs250763	GSM595923	0.792
-2.152	1	Fetal_Brain	Fetal Brain	DHS	UW.Fetal_Brain.ChromatinAccessibility.H-23284.DS14803.twopass.merge150.wgt10.zgt2.wig.gz		GSM595926	1
-2.037	1	Fetal_Brain	Fetal Brain	DHS	UW.Fetal_Brain.ChromatinAccessibility.H-23284.DS14815.twopass.merge150.wgt10.zgt2.wig.gz		GSM595928	1
0.115	0.445	Fetal_Brain	Fetal Brain	DHS	UW.Fetal_Brain.ChromatinAccessibility.H-23399.DS15453.twopass.merge150.wgt10.zgt2.wig.gz	rs250763,rs9946154	GSM665804	0.614
-0.846	0.752	Fetal_Brain	Fetal Brain	DHS	UW.Fetal_Brain.ChromatinAccessibility.H-23548.DS16302.twopass.merge150.wgt10.zgt2.wig.gz	rs9946154	GSM665819	0.814
-0.863	0.746	Fetal_Brain	Fetal Brain	DHS	UW.Fetal_Brain.ChromatinAccessibility.H-24279.DS20221.twopass.merge150.wgt10.zgt2.wig.gz	rs1633768	GSM878650	0.814
-0.693	0.635	Fetal_Brain	Fetal Brain	DHS	UW.Fetal_Brain.ChromatinAccessibility.H-24297.DS20226.twopass.merge150.wgt10.zgt2.wig.gz	rs1633768	GSM878651	0.742
-0.686	0.605	Fetal_Brain	Fetal Brain	DHS	UW.Fetal_Brain.ChromatinAccessibility.H-24381.DS20231.twopass.merge150.wgt10.zgt2.wig.gz	rs250763	GSM878652	0.718
0.536	0.275	Fetal_Heart	Fetal Heart	DHS	UW.Fetal_Heart.ChromatinAccessibility.H-22662.DS12531.twopass.merge150.wgt10.zgt2.wig.gz	rs250763,rs60833263	GSM530654	0.545
1.174	0.161	Fetal_Heart	Fetal Heart	DHS	UW.Fetal_Heart.ChromatinAccessibility.H-22727.DS12810.twopass.merge150.wgt10.zgt2.wig.gz	rs250763,rs74676712,rs9946154	GSM530661	0.5
3.712	0.0046	Fetal_Heart	Fetal Heart	DHS	UW.Fetal_Heart.ChromatinAccessibility.H-23468.DS15839.twopass.merge150.wgt10.zgt2.wig.gz	rs1633768,rs60833263,rs74676712,rs7713981,rs77249081,rs9946154	GSM665811	0.275
2.119	0.0556	Fetal_Heart	Fetal Heart	DHS	UW.Fetal_Heart.ChromatinAccessibility.H-23500.DS16018.twopass.merge150.wgt10.zgt2.wig.gz	rs250763,rs60833263,rs74676712,rs9946154	GSM665814	0.428
2.109	0.0634	Fetal_Heart	Fetal Heart	DHS	UW.Fetal_Heart.ChromatinAccessibility.H-23524.DS16146.twopass.merge150.wgt10.zgt2.wig.gz	rs250763,rs60833263,rs74676712,rs9946154	GSM665817	0.44
1.484	0.121	Fetal_Heart	Fetal Heart	DHS	UW.Fetal_Heart.ChromatinAccessibility.H-23589.DS16500.twopass.merge150.wgt10.zgt2.wig.gz	rs250763,rs60833263,rs74676712,rs9946154	GSM665824	0.5
2.14	0.0505	Fetal_Heart	Fetal Heart	DHS	UW.Fetal_Heart.ChromatinAccessibility.H-23604.DS16582.twopass.merge150.wgt10.zgt2.wig.gz	rs250763,rs60833263,rs74676712,rs9946154	GSM665830	0.428
0.992	0.212	Fetal_Heart	Fetal Heart	DHS	UW.Fetal_Heart.ChromatinAccessibility.H-23617.DS16621.twopass.merge150.wgt10.zgt2.wig.gz	rs250763,rs74676712,rs9946154	GSM665831	0.501
1.053	0.189	Fetal_Heart	Fetal Heart	DHS	UW.Fetal_Heart.ChromatinAccessibility.H-23663.DS16819.twopass.merge150.wgt10.zgt2.wig.gz	rs250763,rs74676712,rs9946154	GSM774203	0.5
0.091	0.439	Fetal_Heart	Fetal Heart	DHS	UW.Fetal_Heart.ChromatinAccessibility.H-23744.DS19431.twopass.merge150.wgt10.zgt2.wig.gz	rs250763,rs60833263	GSM817220	0.614
2.116	0.0544	Fetal_Heart	Fetal Heart	DHS	UW.Fetal_Heart.ChromatinAccessibility.H-24042.DS19427.twopass.merge150.wgt10.zgt2.wig.gz	rs250763,rs60833263,rs74676712,rs9946154	GSM878630	0.428
0.579	0.305	Fetal_Intestine_Large	Fetal Intestine, Large	DHS	UW.Fetal_Intestine_Large.ChromatinAccessibility.H-23500.DS16027.twopass.merge150.wgt10.zgt2.wig.gz	rs250763,rs7713981	GSM665815	0.573
1.603	0.11	Fetal_Intestine_Large	Fetal Intestine, Large	DHS	UW.Fetal_Intestine_Large.ChromatinAccessibility.H-23524.DS16164.twopass.merge150.wgt10.zgt2.wig.gz	rs250763,rs74676712,rs7713981	GSM665818	0.499
1.486	0.124	Fetal_Intestine_Large	Fetal Intestine, Large	DHS	UW.Fetal_Intestine_Large.ChromatinAccessibility.H-23604.DS16563.twopass.merge150.wgt10.zgt2.wig.gz	rs250763,rs74676712,rs7713981	GSM665826	0.5
0.289	0.369	Fetal_Intestine_Large	Fetal Intestine, Large	DHS	UW.Fetal_Intestine_Large.ChromatinAccessibility.H-23744.DS17094.twopass.merge150.wgt10.zgt2.wig.gz	rs250763,rs7713981	GSM817162	0.598
-0.673	0.598	Fetal_Intestine_Large	Fetal Intestine, Large	DHS	UW.Fetal_Intestine_Large.ChromatinAccessibility.H-23758.DS17157.twopass.merge150.wgt10.zgt2.wig.gz	rs250763	GSM701490	0.718
1.619	0.12	Fetal_Intestine_Large	Fetal Intestine, Large	DHS	UW.Fetal_Intestine_Large.ChromatinAccessibility.H-23769.DS17313.twopass.merge150.wgt10.zgt2.wig.gz	rs250763,rs7713981,rs9946154	GSM701495	0.5
0.6	0.256	Fetal_Intestine_Large	Fetal Intestine, Large	DHS	UW.Fetal_Intestine_Large.ChromatinAccessibility.H-23808.DS17422.twopass.merge150.wgt10.zgt2.wig.gz	rs250763,rs9946154	GSM774213	0.53
2.331	0.0416	Fetal_Intestine_Large	Fetal Intestine, Large	DHS	UW.Fetal_Intestine_Large.ChromatinAccessibility.H-23833.DS17462.twopass.merge150.wgt10.zgt2.wig.gz	rs250763,rs2853677,rs74676712,rs7713981	GSM774214	0.428
-2.333	1	Fetal_Intestine_Large	Fetal Intestine, Large	DHS	UW.Fetal_Intestine_Large.ChromatinAccessibility.H-23855.DS17502.twopass.merge150.wgt10.zgt2.wig.gz		GSM701514	1
1.193	0.184	Fetal_Intestine_Large	Fetal Intestine, Large	DHS	UW.Fetal_Intestine_Large.ChromatinAccessibility.H-23887.DS17647.twopass.merge150.wgt10.zgt2.wig.gz	rs250763,rs74676712,rs7713981	GSM774217	0.5
0.614	0.27	Fetal_Intestine_Large	Fetal Intestine, Large	DHS	UW.Fetal_Intestine_Large.ChromatinAccessibility.H-23914.DS17748.twopass.merge150.wgt10.zgt2.wig.gz	rs250763,rs7713981	GSM774220	0.538
0.599	0.256	Fetal_Intestine_Large	Fetal Intestine, Large	DHS	UW.Fetal_Intestine_Large.ChromatinAccessibility.H-23941.DS17785.twopass.merge150.wgt10.zgt2.wig.gz	rs250763,rs7713981	GSM701531	0.53
1.847	0.0998	Fetal_Intestine_Large	Fetal Intestine, Large	DHS	UW.Fetal_Intestine_Large.ChromatinAccessibility.H-23964.DS17841.twopass.merge150.wgt10.zgt2.wig.gz	rs1633768,rs250763,rs74676712,rs7713981	GSM774228	0.499
0.555	0.303	Fetal_Intestine_Large	Fetal Intestine, Large	DHS	UW.Fetal_Intestine_Large.ChromatinAccessibility.H-24005.DS17990.twopass.merge150.wgt10.zgt2.wig.gz	rs250763,rs7713981	GSM774233	0.573
0.254	0.392	Fetal_Intestine_Large	Fetal Intestine, Large	DHS	UW.Fetal_Intestine_Large.ChromatinAccessibility.H-24111.DS18499.twopass.merge150.wgt10.zgt2.wig.gz	rs250763,rs9946154	GSM817188	0.604
1.219	0.161	Fetal_Intestine_Small	Fetal Intestine, Small	DHS	UW.Fetal_Intestine_Small.ChromatinAccessibility.H-23604.DS16559.twopass.merge150.wgt10.zgt2.wig.gz	rs250763,rs74676712,rs7713981	GSM665825	0.5
2.598	0.0386	Fetal_Intestine_Small	Fetal Intestine, Small	DHS	UW.Fetal_Intestine_Small.ChromatinAccessibility.H-23640.DS16712.twopass.merge150.wgt10.zgt2.wig.gz	rs250763,rs60833263,rs7713981	GSM701487	0.428
0.419	0.345	Fetal_Intestine_Small	Fetal Intestine, Small	DHS	UW.Fetal_Intestine_Small.ChromatinAccessibility.H-23663.DS16822.twopass.merge150.wgt10.zgt2.wig.gz	rs250763,rs7713981	GSM665835	0.594
-0.712	0.689	Fetal_Intestine_Small	Fetal Intestine, Small	DHS	UW.Fetal_Intestine_Small.ChromatinAccessibility.H-23724.DS16975.twopass.merge150.wgt10.zgt2.wig.gz	rs7713981	GSM817161	0.786
1.649	0.0994	Fetal_Intestine_Small	Fetal Intestine, Small	DHS	UW.Fetal_Intestine_Small.ChromatinAccessibility.H-23744.DS17092.twopass.merge150.wgt10.zgt2.wig.gz	rs250763,rs2853677,rs7713981	GSM774205	0.499
2.781	0.025	Fetal_Intestine_Small	Fetal Intestine, Small	DHS	UW.Fetal_Intestine_Small.ChromatinAccessibility.H-23758.DS17150.twopass.merge150.wgt10.zgt2.wig.gz	rs250763,rs74676712,rs7713981,rs9946154	GSM774210	0.428
0.466	0.292	Fetal_Intestine_Small	Fetal Intestine, Small	DHS	UW.Fetal_Intestine_Small.ChromatinAccessibility.H-23769.DS17317.twopass.merge150.wgt10.zgt2.wig.gz	rs250763,rs7713981	GSM701496	0.563
1.105	0.142	Fetal_Intestine_Small	Fetal Intestine, Small	DHS	UW.Fetal_Intestine_Small.ChromatinAccessibility.H-23808.DS17425.twopass.merge150.wgt10.zgt2.wig.gz	rs250763,rs60833263	GSM701504	0.5
0.338	0.358	Fetal_Intestine_Small	Fetal Intestine, Small	DHS	UW.Fetal_Intestine_Small.ChromatinAccessibility.H-23864.DS17844.twopass.merge150.wgt10.zgt2.wig.gz	rs250763,rs7713981	GSM774229	0.594
0.278	0.378	Fetal_Intestine_Small	Fetal Intestine, Small	DHS	UW.Fetal_Intestine_Small.ChromatinAccessibility.H-23887.DS17643.twopass.merge150.wgt10.zgt2.wig.gz	rs250763,rs7713981	GSM774216	0.598
0.516	0.281	Fetal_Intestine_Small	Fetal Intestine, Small	DHS	UW.Fetal_Intestine_Small.ChromatinAccessibility.H-23914.DS17763.twopass.merge150.wgt10.zgt2.wig.gz	rs250763,rs7713981	GSM701530	0.552
3.395	0.00972	Fetal_Intestine_Small	Fetal Intestine, Small	DHS	UW.Fetal_Intestine_Small.ChromatinAccessibility.H-23941.DS17808.twopass.merge150.wgt10.zgt2.wig.gz	rs1633768,rs1860826,rs250763,rs60833263,rs7713981	GSM774225	0.323
0.455	0.314	Fetal_Intestine_Small	Fetal Intestine, Small	DHS	UW.Fetal_Intestine_Small.ChromatinAccessibility.H-24111.DS18495.twopass.merge150.wgt10.zgt2.wig.gz	rs250763,rs74676712	GSM817187	0.584
-0.743	0.7	Fetal_Kidney_Left	Fetal Kidney	DHS	UW.Fetal_Kidney_Left.ChromatinAccessibility.H-23589.DS16446.twopass.merge150.wgt10.zgt2.wig.gz	rs9946154	GSM665822	0.792
-0.924	0.807	Fetal_Kidney_Left	Fetal Kidney	DHS	UW.Fetal_Kidney_Left.ChromatinAccessibility.H-23604.DS16579.twopass.merge150.wgt10.zgt2.wig.gz	rs9946154	GSM665829	0.854
1.601	0.108	Fetal_Kidney_Left	Fetal Kidney	DHS	UW.Fetal_Kidney_Left.ChromatinAccessibility.H-23640.DS16805.twopass.merge150.wgt10.zgt2.wig.gz	rs60833263,rs7713981,rs9946154	GSM665834	0.499
-0.787	0.724	Fetal_Kidney_Left	Fetal Kidney	DHS	UW.Fetal_Kidney_Left.ChromatinAccessibility.H-23758.DS17140.twopass.merge150.wgt10.zgt2.wig.gz	rs9946154	GSM774209	0.799
0.132	0.421	Fetal_Kidney_Left	Fetal Kidney	DHS	UW.Fetal_Kidney_Left.ChromatinAccessibility.H-24089.DS18466.twopass.merge150.wgt10.zgt2.wig.gz	rs60833263,rs9946154	GSM817181	0.604
0.065	0.472	Fetal_Kidney_Right	Fetal Kidney	DHS	UW.Fetal_Kidney_Right.ChromatinAccessibility.H-23435.DS15651.twopass.merge150.wgt10.zgt2.wig.gz	rs60833263,rs74676712	GSM665810	0.629
-0.894	0.765	Fetal_Kidney_Right	Fetal Kidney	DHS	UW.Fetal_Kidney_Right.ChromatinAccessibility.H-23589.DS16441.twopass.merge150.wgt10.zgt2.wig.gz	rs9946154	GSM665821	0.82
-0.908	0.814	Fetal_Kidney_Right	Fetal Kidney	DHS	UW.Fetal_Kidney_Right.ChromatinAccessibility.H-23640.DS16801.twopass.merge150.wgt10.zgt2.wig.gz	rs60833263	GSM665833	0.857
1.647	0.107	Fetal_Kidney_Right	Fetal Kidney	DHS	UW.Fetal_Kidney_Right.ChromatinAccessibility.H-23758.DS17144.twopass.merge150.wgt10.zgt2.wig.gz	rs1633768,rs60833263,rs9946154	GSM817163	0.499
1.176	0.184	Fetal_Kidney_Right	Fetal Kidney	DHS	UW.Fetal_Kidney_Right.ChromatinAccessibility.H-24089.DS18463.twopass.merge150.wgt10.zgt2.wig.gz	rs1633768,rs250763,rs9946154	GSM817180	0.5
1.46	0.114	Fetal_Kidney	Fetal Kidney	DHS	UW.Fetal_Kidney.ChromatinAccessibility.H-22337.DS10986.twopass.merge150.wgt10.zgt2.wig.gz	rs250763,rs60833263,rs9946154	GSM493385	0.5
0.595	0.261	Fetal_Kidney	Fetal Kidney	DHS	UW.Fetal_Kidney.ChromatinAccessibility.H-22676.DS12635.twopass.merge150.wgt10.zgt2.wig.gz	rs60833263,rs9946154	GSM530655	0.53
-1.845	1	Fetal_Kidney	Fetal Kidney	DHS	UW.Fetal_Kidney.ChromatinAccessibility.H-23524.DS16139.twopass.merge150.wgt10.zgt2.wig.gz		GSM665816	1
2.714	0.0358	Fetal_Kidney	Fetal Kidney	DHS	UW.Fetal_Kidney.ChromatinAccessibility.H-23663.DS16837.twopass.merge150.wgt10.zgt2.wig.gz	rs1633768,rs60833263,rs74676712,rs9946154	GSM817159	0.428
0.828	0.26	Fetal_Kidney	Fetal Kidney	DHS	UW.Fetal_Kidney.ChromatinAccessibility.H-23855.DS17522.twopass.merge150.wgt10.zgt2.wig.gz	rs250763,rs74676712,rs9946154	GSM701515	0.53
-0.686	0.656	Fetal_Kidney	Fetal Kidney	DHS	UW.Fetal_Kidney.ChromatinAccessibility.H-23914.DS17753.twopass.merge150.wgt10.zgt2.wig.gz	rs60833263	GSM774221	0.763
0.45	0.283	Fetal_Kidney	Fetal Kidney	DHS	UW.Fetal_Kidney.ChromatinAccessibility.H-24507.DS20564.twopass.merge150.wgt10.zgt2.wig.gz	rs60833263,rs7713981	GSM878666	0.552
1.271	0.165	Fetal_Lung_Left	Fetal Lung	DHS	UW.Fetal_Lung_Left.ChromatinAccessibility.H-23435.DS15637.twopass.merge150.wgt10.zgt2.wig.gz	rs1633768,rs250763,rs9946154	GSM665808	0.5
1.187	0.193	Fetal_Lung_Left	Fetal Lung	DHS	UW.Fetal_Lung_Left.ChromatinAccessibility.H-23604.DS16570.twopass.merge150.wgt10.zgt2.wig.gz	rs250763,rs60833263,rs9946154	GSM665828	0.501
2.284	0.0512	Fetal_Lung_Left	Fetal Lung	DHS	UW.Fetal_Lung_Left.ChromatinAccessibility.H-23640.DS18170.twopass.merge150.wgt10.zgt2.wig.gz	rs1633768,rs250763,rs60833263,rs9946154	GSM774237	0.428
3.283	0.0137	Fetal_Lung_Left	Fetal Lung	DHS	UW.Fetal_Lung_Left.ChromatinAccessibility.H-23744.DS17105.twopass.merge150.wgt10.zgt2.wig.gz	rs1633768,rs250763,rs60833263,rs74676712,rs9946154	GSM774207	0.372
2.672	0.029	Fetal_Lung_Left	Fetal Lung	DHS	UW.Fetal_Lung_Left.ChromatinAccessibility.H-23758.DS17154.twopass.merge150.wgt10.zgt2.wig.gz	rs1633768,rs250763,rs60833263,rs74676712,rs9946154	GSM774211	0.428
0.134	0.445	Fetal_Lung_Left	Fetal Lung	DHS	UW.Fetal_Lung_Left.ChromatinAccessibility.H-23833.DS17464.twopass.merge150.wgt10.zgt2.wig.gz	rs250763,rs9946154	GSM701512	0.614
0.663	0.252	Fetal_Lung_Left	Fetal Lung	DHS	UW.Fetal_Lung_Left.ChromatinAccessibility.H-23887.DS17674.twopass.merge150.wgt10.zgt2.wig.gz	rs250763,rs9946154	GSM701524	0.53
-0.623	0.592	Fetal_Lung_Left	Fetal Lung	DHS	UW.Fetal_Lung_Left.ChromatinAccessibility.H-23914.DS17739.twopass.merge150.wgt10.zgt2.wig.gz	rs250763	GSM701527	0.718
-0.592	0.53	Fetal_Lung_Left	Fetal Lung	DHS	UW.Fetal_Lung_Left.ChromatinAccessibility.H-23964.DS17835.twopass.merge150.wgt10.zgt2.wig.gz	rs250763	GSM701534	0.677
0.156	0.426	Fetal_Lung_Left	Fetal Lung	DHS	UW.Fetal_Lung_Left.ChromatinAccessibility.H-24005.DS17959.twopass.merge150.wgt10.zgt2.wig.gz	rs250763,rs9946154	GSM817168	0.607
3.105	0.0175	Fetal_Lung_Left	Fetal Lung	DHS	UW.Fetal_Lung_Left.ChromatinAccessibility.H-24089.DS18421.twopass.merge150.wgt10.zgt2.wig.gz	rs1633768,rs250763,rs60833263,rs74676712,rs9946154	GSM817175	0.428
1.567	0.115	Fetal_Lung_Left	Fetal Lung	DHS	UW.Fetal_Lung_Left.ChromatinAccessibility.H-24111.DS18487.twopass.merge150.wgt10.zgt2.wig.gz	rs250763,rs55857134,rs74676712,rs9946154	GSM817185	0.5
1.411	0.141	Fetal_Lung_Right	Fetal Lung	DHS	UW.Fetal_Lung_Right.ChromatinAccessibility.H-23435.DS15632.twopass.merge150.wgt10.zgt2.wig.gz	rs1633768,rs250763,rs9946154	GSM665807	0.5
1.154	0.184	Fetal_Lung_Right	Fetal Lung	DHS	UW.Fetal_Lung_Right.ChromatinAccessibility.H-23604.DS16566.twopass.merge150.wgt10.zgt2.wig.gz	rs250763,rs74676712,rs9946154	GSM665827	0.5
2.295	0.059	Fetal_Lung_Right	Fetal Lung	DHS	UW.Fetal_Lung_Right.ChromatinAccessibility.H-23640.DS16790.twopass.merge150.wgt10.zgt2.wig.gz	rs1633768,rs250763,rs60833263,rs9946154	GSM665832	0.428
1.21	0.171	Fetal_Lung_Right	Fetal Lung	DHS	UW.Fetal_Lung_Right.ChromatinAccessibility.H-23744.DS17101.twopass.merge150.wgt10.zgt2.wig.gz	rs250763,rs60833263,rs9946154	GSM774206	0.5
0.289	0.37	Fetal_Lung_Right	Fetal Lung	DHS	UW.Fetal_Lung_Right.ChromatinAccessibility.H-23758.DS17162.twopass.merge150.wgt10.zgt2.wig.gz	rs250763,rs9946154	GSM817164	0.598
2.62	0.0358	Fetal_Lung_Right	Fetal Lung	DHS	UW.Fetal_Lung_Right.ChromatinAccessibility.H-23887.DS17670.twopass.merge150.wgt10.zgt2.wig.gz	rs1633768,rs250763,rs60833263,rs9946154	GSM701523	0.428
-0.034	0.513	Fetal_Lung_Right	Fetal Lung	DHS	UW.Fetal_Lung_Right.ChromatinAccessibility.H-23964.DS17831.twopass.merge150.wgt10.zgt2.wig.gz	rs250763,rs9946154	GSM774227	0.665
2.08	0.059	Fetal_Lung_Right	Fetal Lung	DHS	UW.Fetal_Lung_Right.ChromatinAccessibility.H-24005.DS17954.twopass.merge150.wgt10.zgt2.wig.gz	rs250763,rs60833263,rs74676712,rs9946154	GSM774231	0.428
2.621	0.0272	Fetal_Lung_Right	Fetal Lung	DHS	UW.Fetal_Lung_Right.ChromatinAccessibility.H-24089.DS18418.twopass.merge150.wgt10.zgt2.wig.gz	rs1633768,rs250763,rs60833263,rs74676712,rs9946154	GSM817174	0.428
-0.124	0.57	Fetal_Lung_Right	Fetal Lung	DHS	UW.Fetal_Lung_Right.ChromatinAccessibility.H-24111.DS18492.twopass.merge150.wgt10.zgt2.wig.gz	rs250763,rs9946154	GSM817186	0.708
0.938	0.189	Fetal_Lung	Fetal Lung	DHS	UW.Fetal_Lung.ChromatinAccessibility.H-22676.DS12646.twopass.merge150.wgt10.zgt2.wig.gz	rs250763,rs9946154	GSM530656	0.5
0.372	0.354	Fetal_Lung	Fetal Lung	DHS	UW.Fetal_Lung.ChromatinAccessibility.H-22727.DS12817.twopass.merge150.wgt10.zgt2.wig.gz	rs250763,rs9946154	GSM530662	0.594
1.278	0.172	Fetal_Lung	Fetal Lung	DHS	UW.Fetal_Lung.ChromatinAccessibility.H-22934B.DS13507.twopass.merge150.wgt10.zgt2.wig.gz	rs1633768,rs250763,rs9946154	GSM595915	0.5
0.074	0.474	Fetal_Lung	Fetal Lung	DHS	UW.Fetal_Lung.ChromatinAccessibility.H-23090.DS13985.twopass.merge150.wgt10.zgt2.wig.gz	rs250763,rs9946154	GSM595916	0.629
1.706	0.104	Fetal_Lung	Fetal Lung	DHS	UW.Fetal_Lung.ChromatinAccessibility.H-23247.DS14666.twopass.merge150.wgt10.zgt2.wig.gz	rs1633768,rs250763,rs9946154	GSM595921	0.499
1.653	0.101	Fetal_Lung	Fetal Lung	DHS	UW.Fetal_Lung.ChromatinAccessibility.H-23266.DS14724.twopass.merge150.wgt10.zgt2.wig.gz	rs250763,rs60833263,rs9946154	GSM595924	0.499
0.2	0.407	Fetal_Lung	Fetal Lung	DHS	UW.Fetal_Lung.ChromatinAccessibility.H-23266.DS14751.twopass.merge150.wgt10.zgt2.wig.gz	rs250763,rs9946154	GSM595925	0.604
-0.696	0.594	Fetal_Lung	Fetal Lung	DHS	UW.Fetal_Lung.ChromatinAccessibility.H-23284.DS14809.twopass.merge150.wgt10.zgt2.wig.gz	rs250763	GSM595927	0.718
1.584	0.106	Fetal_Lung	Fetal Lung	DHS	UW.Fetal_Lung.ChromatinAccessibility.H-23284.DS14820.twopass.merge150.wgt10.zgt2.wig.gz	rs250763,rs74676712,rs9946154	GSM595929	0.499
0.341	0.33	Fetal_Lung	Fetal Lung	DHS	UW.Fetal_Lung.ChromatinAccessibility.H-23365.DS15227.twopass.merge150.wgt10.zgt2.wig.gz	rs250763,rs9946154	GSM595930	0.591
1.207	0.179	Fetal_Lung	Fetal Lung	DHS	UW.Fetal_Lung.ChromatinAccessibility.H-23399.DS15461.twopass.merge150.wgt10.zgt2.wig.gz	rs1633768,rs250763,rs9946154	GSM665805	0.5
1.169	0.178	Fetal_Lung	Fetal Lung	DHS	UW.Fetal_Lung.ChromatinAccessibility.H-23419.DS15573.twopass.merge150.wgt10.zgt2.wig.gz	rs250763,rs74676712,rs9946154	GSM665806	0.5
0.173	0.406	Fetal_Muscle_Arm	Fetal Muscle	DHS	UW.Fetal_Muscle_Arm.ChromatinAccessibility.H-23808.DS17432.twopass.merge150.wgt10.zgt2.wig.gz	rs250763,rs9946154	GSM701506	0.604
1.176	0.177	Fetal_Muscle_Arm	Fetal Muscle	DHS	UW.Fetal_Muscle_Arm.ChromatinAccessibility.H-23914.DS17765.twopass.merge150.wgt10.zgt2.wig.gz	rs250763,rs74676712,rs7713981,rs9946154	GSM774223	0.5
0.196	0.418	Fetal_Muscle_Arm	Fetal Muscle	DHS	UW.Fetal_Muscle_Arm.ChromatinAccessibility.H-23941.DS17825.twopass.merge150.wgt10.zgt2.wig.gz	rs250763,rs9946154	GSM774226	0.604
0.311	0.363	Fetal_Muscle_Arm	Fetal Muscle	DHS	UW.Fetal_Muscle_Arm.ChromatinAccessibility.H-23964.DS17848.twopass.merge150.wgt10.zgt2.wig.gz	rs250763,rs60833263	GSM701535	0.594
0.635	0.325	Fetal_Muscle_Arm	Fetal Muscle	DHS	UW.Fetal_Muscle_Arm.ChromatinAccessibility.H-24005.DS18080.twopass.merge150.wgt10.zgt2.wig.gz	rs250763,rs74676712,rs9946154	GSM774234	0.589
0.228	0.386	Fetal_Muscle_Arm	Fetal Muscle	DHS	UW.Fetal_Muscle_Arm.ChromatinAccessibility.H-24042.DS18176.twopass.merge150.wgt10.zgt2.wig.gz	rs250763,rs9946154	GSM774239	0.604
0.498	0.301	Fetal_Muscle_Arm	Fetal Muscle	DHS	UW.Fetal_Muscle_Arm.ChromatinAccessibility.H-24078.DS18379.twopass.merge150.wgt10.zgt2.wig.gz	rs250763,rs9946154	GSM878610	0.573
1.945	0.0755	Fetal_Muscle_Arm	Fetal Muscle	DHS	UW.Fetal_Muscle_Arm.ChromatinAccessibility.H-24089.DS18452.twopass.merge150.wgt10.zgt2.wig.gz	rs250763,rs74676712,rs7713981,rs9946154	GSM817178	0.461
1.038	0.217	Fetal_Muscle_Arm	Fetal Muscle	DHS	UW.Fetal_Muscle_Arm.ChromatinAccessibility.H-24111.DS18473.twopass.merge150.wgt10.zgt2.wig.gz	rs250763,rs7713981,rs9946154	GSM817184	0.501
1.378	0.145	Fetal_Muscle_Arm	Fetal Muscle	DHS	UW.Fetal_Muscle_Arm.ChromatinAccessibility.H-24125.DS18559.twopass.merge150.wgt10.zgt2.wig.gz	rs250763,rs74676712,rs9946154	GSM817191	0.5
1.687	0.101	Fetal_Muscle_Arm	Fetal Muscle	DHS	UW.Fetal_Muscle_Arm.ChromatinAccessibility.H-24143.DS18992.twopass.merge150.wgt10.zgt2.wig.gz	rs250763,rs74676712,rs9946154	GSM878618	0.499
0.246	0.36	Fetal_Muscle_Arm	Fetal Muscle	DHS	UW.Fetal_Muscle_Arm.ChromatinAccessibility.H-24198.DS19051.twopass.merge150.wgt10.zgt2.wig.gz	rs250763,rs9946154	GSM878619	0.594
1.143	0.188	Fetal_Muscle_Arm	Fetal Muscle	DHS	UW.Fetal_Muscle_Arm.ChromatinAccessibility.H-24218.DS19053.twopass.merge150.wgt10.zgt2.wig.gz	rs250763,rs60833263,rs9946154	GSM878620	0.5
2.326	0.0524	Fetal_Muscle_Arm	Fetal Muscle	DHS	UW.Fetal_Muscle_Arm.ChromatinAccessibility.H-24244.DS19270.twopass.merge150.wgt10.zgt2.wig.gz	rs1633768,rs250763,rs60833263,rs9946154	GSM878625	0.428
0.207	0.42	Fetal_Muscle_Arm	Fetal Muscle	DHS	UW.Fetal_Muscle_Arm.ChromatinAccessibility.H-24259.DS19295.twopass.merge150.wgt10.zgt2.wig.gz	rs250763,rs9946154	GSM817214	0.604
0.126	0.445	Fetal_Muscle_Arm	Fetal Muscle	DHS	UW.Fetal_Muscle_Arm.ChromatinAccessibility.H-24272.DS19380.twopass.merge150.wgt10.zgt2.wig.gz	rs250763,rs9946154	GSM817216	0.614
1.496	0.121	Fetal_Muscle_Arm	Fetal Muscle	DHS	UW.Fetal_Muscle_Arm.ChromatinAccessibility.H-24297.DS19646.twopass.merge150.wgt10.zgt2.wig.gz	rs250763,rs74676712,rs9946154	GSM878638	0.5
0.573	0.344	Fetal_Muscle_Back	Fetal Muscle	DHS	UW.Fetal_Muscle_Back.ChromatinAccessibility.H-23914.DS17767.twopass.merge150.wgt10.zgt2.wig.gz	rs1860826,rs250763,rs9946154	GSM774224	0.594
0.412	0.334	Fetal_Muscle_Back	Fetal Muscle	DHS	UW.Fetal_Muscle_Back.ChromatinAccessibility.H-23964.DS17850.twopass.merge150.wgt10.zgt2.wig.gz	rs250763,rs9946154	GSM701536	0.591
0.604	0.315	Fetal_Muscle_Back	Fetal Muscle	DHS	UW.Fetal_Muscle_Back.ChromatinAccessibility.H-24005.DS18083.twopass.merge150.wgt10.zgt2.wig.gz	rs250763,rs60833263,rs9946154	GSM774235	0.584
1.395	0.144	Fetal_Muscle_Back	Fetal Muscle	DHS	UW.Fetal_Muscle_Back.ChromatinAccessibility.H-24078.DS18377.twopass.merge150.wgt10.zgt2.wig.gz	rs250763,rs60833263,rs9946154	GSM817171	0.5
0.197	0.407	Fetal_Muscle_Back	Fetal Muscle	DHS	UW.Fetal_Muscle_Back.ChromatinAccessibility.H-24089.DS18454.twopass.merge150.wgt10.zgt2.wig.gz	rs250763,rs9946154	GSM878611	0.604
-0.044	0.521	Fetal_Muscle_Back	Fetal Muscle	DHS	UW.Fetal_Muscle_Back.ChromatinAccessibility.H-24111.DS18468.twopass.merge150.wgt10.zgt2.wig.gz	rs250763,rs9946154	GSM817182	0.672
0.174	0.408	Fetal_Muscle_Back	Fetal Muscle	DHS	UW.Fetal_Muscle_Back.ChromatinAccessibility.H-24143.DS18842.twopass.merge150.wgt10.zgt2.wig.gz	rs250763,rs9946154	GSM817200	0.604
0.261	0.378	Fetal_Muscle_Back	Fetal Muscle	DHS	UW.Fetal_Muscle_Back.ChromatinAccessibility.H-24218.DS19117.twopass.merge150.wgt10.zgt2.wig.gz	rs250763,rs9946154	GSM817207	0.598
0.237	0.374	Fetal_Muscle_Back	Fetal Muscle	DHS	UW.Fetal_Muscle_Back.ChromatinAccessibility.H-24244.DS19283.twopass.merge150.wgt10.zgt2.wig.gz	rs250763,rs9946154	GSM817212	0.598
1.159	0.185	Fetal_Muscle_Back	Fetal Muscle	DHS	UW.Fetal_Muscle_Back.ChromatinAccessibility.H-24272.DS19384.twopass.merge150.wgt10.zgt2.wig.gz	rs250763,rs74676712,rs9946154	GSM817217	0.5
1.291	0.154	Fetal_Muscle_Back	Fetal Muscle	DHS	UW.Fetal_Muscle_Back.ChromatinAccessibility.H-24279.DS19441.twopass.merge150.wgt10.zgt2.wig.gz	rs250763,rs60833263,rs9946154	GSM878632	0.5
1.001	0.216	Fetal_Muscle_Back	Fetal Muscle	DHS	UW.Fetal_Muscle_Back.ChromatinAccessibility.H-24297.DS19648.twopass.merge150.wgt10.zgt2.wig.gz	rs250763,rs74676712,rs9946154	GSM878639	0.501
0.273	0.355	Fetal_Muscle_Back	Fetal Muscle	DHS	UW.Fetal_Muscle_Back.ChromatinAccessibility.H-24409.DS20244.twopass.merge150.wgt10.zgt2.wig.gz	rs250763,rs9946154	GSM878655	0.594
0.104	0.439	Fetal_Muscle_Leg	Fetal Muscle	DHS	UW.Fetal_Muscle_Leg.ChromatinAccessibility.H-23808.DS17429.twopass.merge150.wgt10.zgt2.wig.gz	rs250763,rs9946154	GSM701505	0.614
1.706	0.11	Fetal_Muscle_Leg	Fetal Muscle	DHS	UW.Fetal_Muscle_Leg.ChromatinAccessibility.H-24078.DS18386.twopass.merge150.wgt10.zgt2.wig.gz	rs250763,rs60833263,rs9946154	GSM774242	0.499
1.016	0.216	Fetal_Muscle_Leg	Fetal Muscle	DHS	UW.Fetal_Muscle_Leg.ChromatinAccessibility.H-24089.DS18456.twopass.merge150.wgt10.zgt2.wig.gz	rs1633768,rs250763,rs9946154	GSM817179	0.501
1.641	0.11	Fetal_Muscle_Leg	Fetal Muscle	DHS	UW.Fetal_Muscle_Leg.ChromatinAccessibility.H-24111.DS18471.twopass.merge150.wgt10.zgt2.wig.gz	rs17099613,rs250763,rs74676712,rs9946154	GSM817183	0.499
0.702	0.21	Fetal_Muscle_Leg	Fetal Muscle	DHS	UW.Fetal_Muscle_Leg.ChromatinAccessibility.H-24143.DS18844.twopass.merge150.wgt10.zgt2.wig.gz	rs250763,rs9946154	GSM817201	0.501
1.696	0.102	Fetal_Muscle_Leg	Fetal Muscle	DHS	UW.Fetal_Muscle_Leg.ChromatinAccessibility.H-24198.DS19158.twopass.merge150.wgt10.zgt2.wig.gz	rs17099613,rs250763,rs74676712,rs9946154	GSM878622	0.499
2.213	0.0544	Fetal_Muscle_Leg	Fetal Muscle	DHS	UW.Fetal_Muscle_Leg.ChromatinAccessibility.H-24218.DS19115.twopass.merge150.wgt10.zgt2.wig.gz	rs17099613,rs250763,rs74676712,rs9946154	GSM817206	0.428
2.038	0.0727	Fetal_Muscle_Leg	Fetal Muscle	DHS	UW.Fetal_Muscle_Leg.ChromatinAccessibility.H-24244.DS19272.twopass.merge150.wgt10.zgt2.wig.gz	rs1633768,rs250763,rs74676712,rs9946154	GSM878626	0.453
1.329	0.148	Fetal_Muscle_Leg	Fetal Muscle	DHS	UW.Fetal_Muscle_Leg.ChromatinAccessibility.H-24259.DS19291.twopass.merge150.wgt10.zgt2.wig.gz	rs250763,rs60833263,rs9946154	GSM817213	0.5
0.191	0.419	Fetal_Muscle_Leg	Fetal Muscle	DHS	UW.Fetal_Muscle_Leg.ChromatinAccessibility.H-24279.DS19436.twopass.merge150.wgt10.zgt2.wig.gz	rs250763,rs9946154	GSM878631	0.604
0.208	0.402	Fetal_Muscle_Leg	Fetal Muscle	DHS	UW.Fetal_Muscle_Leg.ChromatinAccessibility.H-24297.DS19643.twopass.merge150.wgt10.zgt2.wig.gz	rs250763,rs9946154	GSM878637	0.604
0.225	0.407	Fetal_Muscle_Leg	Fetal Muscle	DHS	UW.Fetal_Muscle_Leg.ChromatinAccessibility.H-24409.DS20239.twopass.merge150.wgt10.zgt2.wig.gz	rs250763,rs9946154	GSM878653	0.604
0.728	0.288	Fetal_Muscle_Lower_Limb_Skeletal	Fetal Muscle	DHS	UW.Fetal_Muscle_Lower_Limb_Skeletal.ChromatinAccessibility.H-24042.DS18174.twopass.merge150.wgt10.zgt2.wig.gz	rs250763,rs74676712,rs9946154	GSM774238	0.559
2.526	0.0321	Fetal_Muscle_Trunk	Fetal Muscle	DHS	UW.Fetal_Muscle_Trunk.ChromatinAccessibility.H-23941.DS17827.twopass.merge150.wgt10.zgt2.wig.gz	rs250763,rs60833263,rs7713981,rs9946154	GSM701533	0.428
0.046	0.446	Fetal_Muscle_Trunk	Fetal Muscle	DHS	UW.Fetal_Muscle_Trunk.ChromatinAccessibility.H-24409.DS20242.twopass.merge150.wgt10.zgt2.wig.gz	rs250763,rs9946154	GSM878654	0.614
0.224	0.378	Fetal_Muscle_Trunk	Fetal Muscle	DHS	UW.Fetal_Muscle_Trunk.ChromatinAccessibility.H-24507.DS20544.twopass.merge150.wgt10.zgt2.wig.gz	rs250763,rs9946154	GSM878664	0.598
0.418	0.319	Fetal_Muscle_Upper_Limb_Skeletal	Fetal Muscle	DHS	UW.Fetal_Muscle_Upper_Limb_Skeletal.ChromatinAccessibility.H-23887.DS17661.twopass.merge150.wgt10.zgt2.wig.gz	rs250763,rs9946154	GSM701522	0.584
0.039	0.481	Fetal_Muscle_Upper_Trunk	Fetal Muscle	DHS	UW.Fetal_Muscle_Upper_Trunk.ChromatinAccessibility.H-23887.DS17664.twopass.merge150.wgt10.zgt2.wig.gz	rs250763,rs9946154	GSM774218	0.634
-0.003	0.513	Fetal_Placenta	Fetal Placenta	DHS	UW.Fetal_Placenta.ChromatinAccessibility.H-23887.DS17639.twopass.merge150.wgt10.zgt2.wig.gz	rs250763,rs9864772	GSM774215	0.665
-0.827	0.721	Fetal_Placenta	Fetal Placenta	DHS	UW.Fetal_Placenta.ChromatinAccessibility.H-23914.DS17744.twopass.merge150.wgt10.zgt2.wig.gz	rs250763	GSM774219	0.799
-0.785	0.698	Fetal_Placenta	Fetal Placenta	DHS	UW.Fetal_Placenta.ChromatinAccessibility.H-24272.DS19391.twopass.merge150.wgt10.zgt2.wig.gz	rs9864772	GSM817219	0.792
-0.813	0.712	Fetal_Placenta	Fetal Placenta	DHS	UW.Fetal_Placenta.ChromatinAccessibility.H-24409.DS20346.twopass.merge150.wgt10.zgt2.wig.gz	rs74676712	GSM878659	0.792
2.042	0.0695	Fetal_Renal_Cortex_Left	Fetal Renal Cortex	DHS	UW.Fetal_Renal_Cortex_Left.ChromatinAccessibility.H-23871.DS17550.twopass.merge150.wgt10.zgt2.wig.gz	rs1633768,rs60833263,rs74676712,rs9946154	GSM701519	0.442
0.904	0.249	Fetal_Renal_Cortex_Left	Fetal Renal Cortex	DHS	UW.Fetal_Renal_Cortex_Left.ChromatinAccessibility.H-24111.DS18542.twopass.merge150.wgt10.zgt2.wig.gz	rs250763,rs60833263,rs9946154	GSM817190	0.53
-1.941	1	Fetal_Renal_Cortex_Left	Fetal Renal Cortex	DHS	UW.Fetal_Renal_Cortex_Left.ChromatinAccessibility.H-24169.DS18931.twopass.merge150.wgt10.zgt2.wig.gz		GSM817203	1
0.975	0.218	Fetal_Renal_Cortex_Left	Fetal Renal Cortex	DHS	UW.Fetal_Renal_Cortex_Left.ChromatinAccessibility.H-24232.DS19257.twopass.merge150.wgt10.zgt2.wig.gz	rs60833263,rs7713981,rs9946154	GSM817211	0.501
0.067	0.475	Fetal_Renal_Cortex_Right	Fetal Renal Cortex	DHS	UW.Fetal_Renal_Cortex_Right.ChromatinAccessibility.H-23871.DS17545.twopass.merge150.wgt10.zgt2.wig.gz	rs250763,rs60833263	GSM701517	0.629
-0.859	0.75	Fetal_Renal_Cortex_Right	Fetal Renal Cortex	DHS	UW.Fetal_Renal_Cortex_Right.ChromatinAccessibility.H-24169.DS18928.twopass.merge150.wgt10.zgt2.wig.gz	rs1633768	GSM817202	0.814
-0.843	0.764	Fetal_Renal_Cortex_Right	Fetal Renal Cortex	DHS	UW.Fetal_Renal_Cortex_Right.ChromatinAccessibility.H-24232.DS19254.twopass.merge150.wgt10.zgt2.wig.gz	rs9946154	GSM817210	0.82
1.055	0.191	Fetal_Renal_Cortex	Fetal Renal Cortex	DHS	UW.Fetal_Renal_Cortex.ChromatinAccessibility.H-23769.DS17307.twopass.merge150.wgt10.zgt2.wig.gz	rs250763,rs60833263,rs9946154	GSM701494	0.5
0.385	0.348	Fetal_Renal_Cortex	Fetal Renal Cortex	DHS	UW.Fetal_Renal_Cortex.ChromatinAccessibility.H-23790.DS17387.twopass.merge150.wgt10.zgt2.wig.gz	rs250763,rs74676712	GSM701502	0.594
0.222	0.404	Fetal_Renal_Cortex	Fetal Renal Cortex	DHS	UW.Fetal_Renal_Cortex.ChromatinAccessibility.H-23833.DS17455.twopass.merge150.wgt10.zgt2.wig.gz	rs60833263,rs9946154	GSM701511	0.604
-0.721	0.621	Fetal_Renal_Cortex	Fetal Renal Cortex	DHS	UW.Fetal_Renal_Cortex.ChromatinAccessibility.H-23914.DS17756.twopass.merge150.wgt10.zgt2.wig.gz	rs9847631	GSM701529	0.728
-1.923	1	Fetal_Renal_Cortex	Fetal Renal Cortex	DHS	UW.Fetal_Renal_Cortex.ChromatinAccessibility.H-23941.DS17804.twopass.merge150.wgt10.zgt2.wig.gz		GSM701532	1
0.158	0.422	Fetal_Renal_Cortex	Fetal Renal Cortex	DHS	UW.Fetal_Renal_Cortex.ChromatinAccessibility.H-24078.DS18428.twopass.merge150.wgt10.zgt2.wig.gz	rs60833263,rs9946154	GSM817176	0.604
0.482	0.302	Fetal_Renal_Cortex	Fetal Renal Cortex	DHS	UW.Fetal_Renal_Cortex.ChromatinAccessibility.H-24259.DS19388.twopass.merge150.wgt10.zgt2.wig.gz	rs1633768,rs74676712	GSM878629	0.573
1.247	0.167	Fetal_Renal_Cortex	Fetal Renal Cortex	DHS	UW.Fetal_Renal_Cortex.ChromatinAccessibility.H-24493.DS20568.twopass.merge150.wgt10.zgt2.wig.gz	rs250763,rs60833263,rs74676712	GSM878667	0.5
2.202	0.0569	Fetal_Renal_Pelvis_Left	Fetal Renal Pelvis	DHS	UW.Fetal_Renal_Pelvis_Left.ChromatinAccessibility.H-23871.DS17553.twopass.merge150.wgt10.zgt2.wig.gz	rs250763,rs60833263,rs74676712,rs9946154	GSM701520	0.428
-2.01	1	Fetal_Renal_Pelvis_Left	Fetal Renal Pelvis	DHS	UW.Fetal_Renal_Pelvis_Left.ChromatinAccessibility.H-24111.DS18666.twopass.merge150.wgt10.zgt2.wig.gz		GSM817193	1
-0.786	0.712	Fetal_Renal_Pelvis_Left	Fetal Renal Pelvis	DHS	UW.Fetal_Renal_Pelvis_Left.ChromatinAccessibility.H-24169.DS18964.twopass.merge150.wgt10.zgt2.wig.gz	rs9946154	GSM817205	0.792
2.374	0.0408	Fetal_Renal_Pelvis_Left	Fetal Renal Pelvis	DHS	UW.Fetal_Renal_Pelvis_Left.ChromatinAccessibility.H-24232.DS19238.twopass.merge150.wgt10.zgt2.wig.gz	rs1633768,rs250763,rs60833263,rs74676712	GSM817209	0.428
0.156	0.45	Fetal_Renal_Pelvis_Right	Fetal Renal Pelvis	DHS	UW.Fetal_Renal_Pelvis_Right.ChromatinAccessibility.H-23871.DS17548.twopass.merge150.wgt10.zgt2.wig.gz	rs250763,rs9946154	GSM701518	0.618
-0.867	0.779	Fetal_Renal_Pelvis_Right	Fetal Renal Pelvis	DHS	UW.Fetal_Renal_Pelvis_Right.ChromatinAccessibility.H-24111.DS18663.twopass.merge150.wgt10.zgt2.wig.gz	rs60833263	GSM817192	0.829
-0.746	0.685	Fetal_Renal_Pelvis_Right	Fetal Renal Pelvis	DHS	UW.Fetal_Renal_Pelvis_Right.ChromatinAccessibility.H-24169.DS18961.twopass.merge150.wgt10.zgt2.wig.gz	rs60833263	GSM817204	0.786
-0.779	0.705	Fetal_Renal_Pelvis_Right	Fetal Renal Pelvis	DHS	UW.Fetal_Renal_Pelvis_Right.ChromatinAccessibility.H-24232.DS19235.twopass.merge150.wgt10.zgt2.wig.gz	rs60833263	GSM817208	0.792
1.325	0.15	Fetal_Renal_Pelvis	Fetal Renal Pelvis	DHS	UW.Fetal_Renal_Pelvis.ChromatinAccessibility.H-23790.DS17381.twopass.merge150.wgt10.zgt2.wig.gz	rs250763,rs60833263,rs9946154	GSM701501	0.5
-0.817	0.765	Fetal_Renal_Pelvis	Fetal Renal Pelvis	DHS	UW.Fetal_Renal_Pelvis.ChromatinAccessibility.H-23833.DS17451.twopass.merge150.wgt10.zgt2.wig.gz	rs60833263	GSM701510	0.82
-0.818	0.74	Fetal_Renal_Pelvis	Fetal Renal Pelvis	DHS	UW.Fetal_Renal_Pelvis.ChromatinAccessibility.H-23914.DS17760.twopass.merge150.wgt10.zgt2.wig.gz	rs250763	GSM774222	0.811
-2.11	1	Fetal_Renal_Pelvis	Fetal Renal Pelvis	DHS	UW.Fetal_Renal_Pelvis.ChromatinAccessibility.H-24005.DS18088.twopass.merge150.wgt10.zgt2.wig.gz		GSM774236	1
-0.802	0.712	Fetal_Renal_Pelvis	Fetal Renal Pelvis	DHS	UW.Fetal_Renal_Pelvis.ChromatinAccessibility.H-24078.DS18431.twopass.merge150.wgt10.zgt2.wig.gz	rs9946154	GSM817177	0.792
0.239	0.41	Fetal_Renal_Pelvis	Fetal Renal Pelvis	DHS	UW.Fetal_Renal_Pelvis.ChromatinAccessibility.H-24259.DS19386.twopass.merge150.wgt10.zgt2.wig.gz	rs250763,rs74676712	GSM817218	0.604
-0.969	0.809	Fetal_Renal_Pelvis	Fetal Renal Pelvis	DHS	UW.Fetal_Renal_Pelvis.ChromatinAccessibility.H-24477.DS20448.twopass.merge150.wgt10.zgt2.wig.gz	rs60833263	GSM878662	0.854
-0.716	0.618	Fetal_Skin	Fetal Skin	DHS	UW.Fetal_Skin.ChromatinAccessibility.H-22337.DS10987.twopass.merge150.wgt10.zgt2.wig.gz	rs9946154	GSM817158	0.728
-0.228	0.605	Fetal_Spinal_Cord	Fetal Spinal Cord	DHS	UW.Fetal_Spinal_Cord.ChromatinAccessibility.H-24111.DS18501.twopass.merge150.wgt10.zgt2.wig.gz	rs250763,rs9946154	GSM817189	0.718
0.213	0.398	Fetal_Spinal_Cord	Fetal Spinal Cord	DHS	UW.Fetal_Spinal_Cord.ChromatinAccessibility.H-24409.DS20351.twopass.merge150.wgt10.zgt2.wig.gz	rs250763,rs9946154	GSM878661	0.604
-0.88	0.773	Fetal_Spinal_Cord	Fetal Spinal Cord	DHS	UW.Fetal_Spinal_Cord.ChromatinAccessibility.H-24493.DS20530.twopass.merge150.wgt10.zgt2.wig.gz	rs250763	GSM878663	0.825
0.392	0.333	Fetal_Spleen	Fetal Spleen	DHS	UW.Fetal_Spleen.ChromatinAccessibility.H-23399.DS17448.twopass.merge150.wgt10.zgt2.wig.gz	rs12616536,rs250763	GSM701509	0.591
0.382	0.33	Fetal_Stomach	Fetal Stomach	DHS	UW.Fetal_Stomach.ChromatinAccessibility.H-23589.DS16530.twopass.merge150.wgt10.zgt2.wig.gz	rs250763,rs7713981	GSM774202	0.591
0.41	0.319	Fetal_Stomach	Fetal Stomach	DHS	UW.Fetal_Stomach.ChromatinAccessibility.H-23758.DS17172.twopass.merge150.wgt10.zgt2.wig.gz	rs250763,rs7713981	GSM774212	0.584
1.037	0.177	Fetal_Stomach	Fetal Stomach	DHS	UW.Fetal_Stomach.ChromatinAccessibility.H-23769.DS17325.twopass.merge150.wgt10.zgt2.wig.gz	rs250763,rs7713981	GSM701498	0.5
2.1	0.0598	Fetal_Stomach	Fetal Stomach	DHS	UW.Fetal_Stomach.ChromatinAccessibility.H-23887.DS17659.twopass.merge150.wgt10.zgt2.wig.gz	rs250763,rs74676712,rs9946154	GSM701521	0.428
-0.721	0.597	Fetal_Stomach	Fetal Stomach	DHS	UW.Fetal_Stomach.ChromatinAccessibility.H-23914.DS17750.twopass.merge150.wgt10.zgt2.wig.gz	rs250763	GSM701528	0.718
0.317	0.364	Fetal_Stomach	Fetal Stomach	DHS	UW.Fetal_Stomach.ChromatinAccessibility.H-23964.DS17878.twopass.merge150.wgt10.zgt2.wig.gz	rs250763,rs7713981	GSM701538	0.594
1.27	0.154	Fetal_Stomach	Fetal Stomach	DHS	UW.Fetal_Stomach.ChromatinAccessibility.H-24005.DS17963.twopass.merge150.wgt10.zgt2.wig.gz	rs1633768,rs250763,rs9946154	GSM774232	0.5
0.354	0.342	Fetal_Stomach	Fetal Stomach	DHS	UW.Fetal_Stomach.ChromatinAccessibility.H-24078.DS18389.twopass.merge150.wgt10.zgt2.wig.gz	rs250763,rs7713981	GSM817173	0.594
2.68	0.0256	Fetal_Stomach	Fetal Stomach	DHS	UW.Fetal_Stomach.ChromatinAccessibility.H-24125.DS18821.twopass.merge150.wgt10.zgt2.wig.gz	rs250763,rs74676712,rs7713981,rs9946154	GSM817199	0.428
2.518	0.0383	Fetal_Stomach	Fetal Stomach	DHS	UW.Fetal_Stomach.ChromatinAccessibility.H-24401.DS20349.twopass.merge150.wgt10.zgt2.wig.gz	rs17099613,rs250763,rs7713981,rs9946154	GSM878660	0.428
2.559	0.0351	Fetal_Stomach	Fetal Stomach	DHS	UW.Fetal_Stomach.ChromatinAccessibility.H-24507.DS20546.twopass.merge150.wgt10.zgt2.wig.gz	rs1633768,rs250763,rs2853677,rs74676712	GSM878665	0.428
-0.814	0.739	Fetal_Testes	Fetal Testes	DHS	UW.Fetal_Testes.ChromatinAccessibility.H24198_H23640_H24042.DS18942.twopass.merge150.wgt10.zgt2.wig.gz	rs9946154	GSM878617	0.811
4.349	0.00327	Fetal_Thymus	Fetal Thymus	DHS	UW.Fetal_Thymus.ChromatinAccessibility.H-23589.DS16490.twopass.merge150.wgt10.zgt2.wig.gz	rs1860826,rs250763,rs55857134,rs60833263,rs74676712	GSM665823	0.244
6.208	0.00023	Fetal_Thymus	Fetal Thymus	DHS	UW.Fetal_Thymus.ChromatinAccessibility.H-23663.DS16841.twopass.merge150.wgt10.zgt2.wig.gz	rs1633768,rs1860826,rs250763,rs60833263,rs7713981,rs9946154	GSM774204	0.0345
2.124	0.056	Fetal_Thymus	Fetal Thymus	DHS	UW.Fetal_Thymus.ChromatinAccessibility.H-23769.DS17323.twopass.merge150.wgt10.zgt2.wig.gz	rs1860826,rs60833263,rs9946154	GSM701497	0.428
1.746	0.0996	Fetal_Thymus	Fetal Thymus	DHS	UW.Fetal_Thymus.ChromatinAccessibility.H-23833.DS17474.twopass.merge150.wgt10.zgt2.wig.gz	rs1860826,rs60833263,rs9946154	GSM701513	0.499
-0.633	0.529	Fetal_Thymus	Fetal Thymus	DHS	UW.Fetal_Thymus.ChromatinAccessibility.H-23964.DS17875.twopass.merge150.wgt10.zgt2.wig.gz	rs1860826	GSM701537	0.677
3.742	0.00829	Fetal_Thymus	Fetal Thymus	DHS	UW.Fetal_Thymus.ChromatinAccessibility.H-23964.DS17876.twopass.merge150.wgt10.zgt2.wig.gz	rs1860826,rs250763,rs55857134,rs60833263,rs9946154	GSM774230	0.315
1.107	0.203	Fetal_Thymus	Fetal Thymus	DHS	UW.Fetal_Thymus.ChromatinAccessibility.H-24078.DS18382.twopass.merge150.wgt10.zgt2.wig.gz	rs1633768,rs1860826,rs60833263	GSM817172	0.501
0.615	0.256	Fetal_Thymus	Fetal Thymus	DHS	UW.Fetal_Thymus.ChromatinAccessibility.H-24259.DS19287.twopass.merge150.wgt10.zgt2.wig.gz	rs250763,rs9946154	GSM878627	0.53
0.925	0.173	Fetal_Thymus	Fetal Thymus	DHS	UW.Fetal_Thymus.ChromatinAccessibility.H-24401.DS20335.twopass.merge150.wgt10.zgt2.wig.gz	rs1860826,rs60833263	GSM878656	0.5
3.586	0.00826	Fetal_Thymus	Fetal Thymus	DHS	UW.Fetal_Thymus.ChromatinAccessibility.H-24409.DS20341.twopass.merge150.wgt10.zgt2.wig.gz	rs1860826,rs250763,rs60833263,rs9946154	GSM878657	0.315
1.951	0.0647	Fibroblasts_Fetal_Skin_Abdomen	Fibroblast	DHS	UW.Fibroblasts_Fetal_Skin_Abdomen.ChromatinAccessibility.H-24259.DS19558.twopass.merge150.wgt10.zgt2.wig.gz	rs250763,rs7713981,rs9864772	GSM878635	0.44
1.937	0.0662	Fibroblasts_Fetal_Skin_Abdomen	Fibroblast	DHS	UW.Fibroblasts_Fetal_Skin_Abdomen.ChromatinAccessibility.H-24259.DS19561.twopass.merge150.wgt10.zgt2.wig.gz	rs1633768,rs250763,rs9864772	GSM878636	0.44
0.891	0.169	Fibroblasts_Fetal_Skin_Back	Fibroblast	DHS	UW.Fibroblasts_Fetal_Skin_Back.ChromatinAccessibility.H-24218.DS19233.twopass.merge150.wgt10.zgt2.wig.gz	rs250763,rs9864772	GSM878624	0.5
0.739	0.211	Fibroblasts_Fetal_Skin_Biceps_Left	Fibroblast	DHS	UW.Fibroblasts_Fetal_Skin_Biceps_Left.ChromatinAccessibility.H-24259.DS19857.twopass.merge150.wgt10.zgt2.wig.gz	rs250763,rs9864772	GSM878644	0.501
0.783	0.204	Fibroblasts_Fetal_Skin_Biceps_Left	Fibroblast	DHS	UW.Fibroblasts_Fetal_Skin_Biceps_Left.ChromatinAccessibility.H-24259.DS19867.twopass.merge150.wgt10.zgt2.wig.gz	rs250763,rs9864772	GSM878645	0.501
0.867	0.178	Fibroblasts_Fetal_Skin_Biceps_Right	Fibroblast	DHS	UW.Fibroblasts_Fetal_Skin_Biceps_Right.ChromatinAccessibility.H-24259.DS19745.twopass.merge150.wgt10.zgt2.wig.gz	rs250763,rs9864772	GSM878642	0.5
-0.66	0.57	Fibroblasts_Fetal_Skin_Biceps_Right	Fibroblast	DHS	UW.Fibroblasts_Fetal_Skin_Biceps_Right.ChromatinAccessibility.H-24259.DS19761.twopass.merge150.wgt10.zgt2.wig.gz	rs250763	GSM878643	0.708
0.598	0.245	Fibroblasts_Fetal_Skin_Quadriceps_Left	Fibroblast	DHS	UW.Fibroblasts_Fetal_Skin_Quadriceps_Left.ChromatinAccessibility.H-24259.DS20046.twopass.merge150.wgt10.zgt2.wig.gz	rs250763,rs9864772	GSM878648	0.53
0.56	0.263	Fibroblasts_Fetal_Skin_Quadriceps_Left	Fibroblast	DHS	UW.Fibroblasts_Fetal_Skin_Quadriceps_Left.ChromatinAccessibility.H-24259.DS20056.twopass.merge150.wgt10.zgt2.wig.gz	rs250763,rs9864772	GSM878649	0.531
-0.652	0.57	Fibroblasts_Fetal_Skin_Quadriceps_Right	Fibroblast	DHS	UW.Fibroblasts_Fetal_Skin_Quadriceps_Right.ChromatinAccessibility.H-24259.DS19943.twopass.merge150.wgt10.zgt2.wig.gz	rs250763	GSM878646	0.708
0.606	0.253	Fibroblasts_Fetal_Skin_Quadriceps_Right	Fibroblast	DHS	UW.Fibroblasts_Fetal_Skin_Quadriceps_Right.ChromatinAccessibility.H-24259.DS19948.twopass.merge150.wgt10.zgt2.wig.gz	rs250763,rs9864772	GSM878647	0.53
0.918	0.152	Fibroblasts_Fetal_Skin_Scalp	Fibroblast	DHS	UW.Fibroblasts_Fetal_Skin_Scalp.ChromatinAccessibility.H-24259.DS19444.twopass.merge150.wgt10.zgt2.wig.gz	rs250763,rs9864772	GSM878633	0.5
0.921	0.172	Fibroblasts_Fetal_Skin_Scalp	Fibroblast	DHS	UW.Fibroblasts_Fetal_Skin_Scalp.ChromatinAccessibility.H-24259.DS19449.twopass.merge150.wgt10.zgt2.wig.gz	rs250763,rs9864772	GSM878634	0.5
-0.687	0.578	Fibroblasts_Fetal_Skin_Upper_Back	Fibroblast	DHS	UW.Fibroblasts_Fetal_Skin_Upper_Back.ChromatinAccessibility.H-24259.DS19696.twopass.merge150.wgt10.zgt2.wig.gz	rs250763	GSM878640	0.712
0.534	0.261	Fibroblasts_Fetal_Skin_Upper_Back	Fibroblast	DHS	UW.Fibroblasts_Fetal_Skin_Upper_Back.ChromatinAccessibility.H-24259.DS19706.twopass.merge150.wgt10.zgt2.wig.gz	rs250763,rs9864772	GSM878641	0.53
1.125	0.184	Penis_Foreskin_Fibroblast	Fibroblast	DHS	UW.Penis_Foreskin_Fibroblast_Primary_Cells.ChromatinAccessibility.skin01.DS18224.twopass.merge150.wgt10.zgt2.wig.gz	rs17099613,rs250763,rs9864772	GSM774240	0.5
1.451	0.132	Penis_Foreskin_Fibroblast	Fibroblast	DHS	UW.Penis_Foreskin_Fibroblast_Primary_Cells.ChromatinAccessibility.skin01.DS18229.twopass.merge150.wgt10.zgt2.wig.gz	rs17099613,rs250763,rs9864772	GSM774241	0.5
0.652	0.241	Penis_Foreskin_Fibroblast	Fibroblast	DHS	UW.Penis_Foreskin_Fibroblast_Primary_Cells.ChromatinAccessibility.skin02.DS18252.twopass.merge150.wgt10.zgt2.wig.gz	rs250763,rs9864772	GSM817169	0.53
0.587	0.258	Penis_Foreskin_Fibroblast	Fibroblast	DHS	UW.Penis_Foreskin_Fibroblast_Primary_Cells.ChromatinAccessibility.skin02.DS18256.twopass.merge150.wgt10.zgt2.wig.gz	rs250763,rs9864772	GSM817170	0.53
0.815	0.207	iPS_DF_4.7	IPS cell	DHS	UW.iPS_DF_4.7.ChromatinAccessibility.DS15169.twopass.merge150.wgt10.zgt2.wig.gz	rs1633768,rs74676712	GSM665803	0.501
1.678	0.101	iPS_DF_6.9	IPS cell	DHS	UW.iPS_DF_6.9.ChromatinAccessibility.DS15164.twopass.merge150.wgt10.zgt2.wig.gz	rs1633768,rs60833263,rs7713981	GSM665802	0.499
-0.621	0.546	iPS_DF_19.7	IPS cell	DHS	UW.iPS_DF_19.7.ChromatinAccessibility.DS15148.twopass.merge150.wgt10.zgt2.wig.gz	rs1633768	GSM665800	0.689
2.194	0.0691	iPS_DF_19.11	IPS cell	DHS	UW.iPS_DF_19.11.ChromatinAccessibility.DS15153.twopass.merge150.wgt10.zgt2.wig.gz	rs1633768,rs60833263,rs7713981	GSM665801	0.442
0.801	0.206	IMR90	Lung	DHS	UW.IMR90.ChromatinAccessibility.DS11759.twopass.merge150.wgt10.zgt2.wig.gz	rs250763,rs9864772	GSM468792	0.501
0.768	0.207	IMR90	Lung	DHS	UW.IMR90.ChromatinAccessibility.DS11764.twopass.merge150.wgt10.zgt2.wig.gz	rs250763,rs9864772	GSM468801	0.501
1.936	0.0852	IMR90	Lung	DHS	UW.IMR90.ChromatinAccessibility.DS13219.twopass.merge150.wgt10.zgt2.wig.gz	rs250763,rs74676712,rs9864772	GSM530665	0.499
0.741	0.216	IMR90	Lung	DHS	UW.IMR90.ChromatinAccessibility.DS13229.twopass.merge150.wgt10.zgt2.wig.gz	rs250763,rs9864772	GSM530666	0.501
0.352	0.348	Penis_Foreskin_Keratinocyte	Skin	DHS	UW.Penis_Foreskin_Keratinocyte_Primary_Cells.ChromatinAccessibility.skin01.DS18692.twopass.merge150.wgt10.zgt2.wig.gz	rs250763,rs74676712	GSM817194	0.594
-0.789	0.673	Penis_Foreskin_Keratinocyte	Skin	DHS	UW.Penis_Foreskin_Keratinocyte_Primary_Cells.ChromatinAccessibility.skin01.DS18695.twopass.merge150.wgt10.zgt2.wig.gz	rs250763	GSM817195	0.777
-0.777	0.688	Penis_Foreskin_Keratinocyte	Skin	DHS	UW.Penis_Foreskin_Keratinocyte_Primary_Cells.ChromatinAccessibility.skin02.DS18714.twopass.merge150.wgt10.zgt2.wig.gz	rs250763	GSM817196	0.786
0.481	0.323	Penis_Foreskin_Keratinocyte	Skin	DHS	UW.Penis_Foreskin_Keratinocyte_Primary_Cells.ChromatinAccessibility.skin02.DS18718.twopass.merge150.wgt10.zgt2.wig.gz	rs250763,rs74676712	GSM817197	0.589
0.584	0.253	Penis_Foreskin_Melanocyte	Skin	DHS	UW.Penis_Foreskin_Melanocyte_Primary_Cells.ChromatinAccessibility.skin01.DS18590.twopass.merge150.wgt10.zgt2.wig.gz	rs250763,rs7713981	GSM774243	0.53
1.487	0.125	Penis_Foreskin_Melanocyte	Skin	DHS	UW.Penis_Foreskin_Melanocyte_Primary_Cells.ChromatinAccessibility.skin01.DS18601.twopass.merge150.wgt10.zgt2.wig.gz	rs250763,rs74676712,rs9946154	GSM774244	0.5
FORGE2 enrichment Zscore: Z-score of the overlap count of the input data versus the background.
FORGE2 enrichment Pvalue: P-value of the overlap count of the input data versus the background.
Cell: cell type in which the enrichment is being computed.
Tissue: tissue annotation according to either ENCODE, Roadmap Epigenomics, BLUEPRINT, or BioSamples.
Datatype: type of epigenomic track analysed.
File: file name for the specific epigenomic track analysed.
Probe: The specific SNPs that overlap epigenomic tracks in that file.
Accession: GEO accession number of the sample or dataset.
FORGE2 enrichment Qvalue: Q-value of the overlap count of the input data versus the background.
Input SNPs for analysis:
rs12616536
rs75405916
rs9864772
rs77249081
rs74676712
rs9847631
rs62329718
rs60833263
rs7713981
rs7705526
rs2853677
rs250763
rs116466979
rs1860826
rs62471615
rs1327494
rs1633768
rs1800057
rs7310615
rs8002412
rs144202762
rs17099613
rs9946154
rs55857134
rs17879961
